# Supplementary material for: Proteome profile of peripheral myelin in healthy mice and in a neuropathy model
Source: eLife. 2020 Mar 4;9:e51406. doi: 10.7554/eLife.51406 (PMC7056269; doi:10.7554/eLife.51406)
Supplement: Figure 1—source data 1. — Tryptic peptides derived from four technical replicates (replicate digestion and replicate injection) per three biological replicate (20 sciatic nerves pooled from 10 animals) were analyzed by LC-MS (12 runs in total). Proteins (FDR < 1%; 2 peptides/protein) and peptides (FDR < 1%;≥7 amino acids) were identified by database search against the UniprotKB/SwissProt mouse database using PLGS. Data were post-processed with the software package ISOQuant to calculate absolute in-sample amounts for each detected protein based on the TOP3 approach. Reported abundance values are defined as the relative amount of each protein in respect to the sum over all detected proteins (ppm: parts per million (w/w) of total protein). Typical contaminant proteins like keratins were filtered. → sheet 1: protein identification details → sheet 2: WT myelin proteome by MSE → sheet 3: WT myelin proteome by UD-MSE → sheet 4: WT myelin proteome by DRE UD-MSE → sheet 5: 45 proteins additionally identified in WT myelin by 1D-gel-LC-MS. [file elife-51406-fig1-data1.xlsx]

## Sheet: Table legend
Figure 1-Source data 1. Label-free quantification of proteins in wild-type PNS myelin fractions by three different data acquisition modes
Identification and quantification data of detected myelin-associated proteins. Tryptic peptides derived from four technical replicates (replicate digestion and replicate injection) per three biological replicate (20 sciatic nerves pooled from 10 animals) were analyzed by LC-MS (12 runs in total). Proteins (FDR < 1%; 2 peptides/protein) and peptides (FDR < 1%; ≥7 amino acids) were identified by da…
Tab 1	Protein ID details	Number of peptides and proteins identified
Tab 2	MSe proteome WT myelin	LC-MS analysis of PNS myelin by MSe (i.e. with highest dynamic range)
Tab 3	UDMSe proteome WT myelin	LC-MS analysis of PNS myelin by UDMSe (i.e. with highest proteome depth)
Tab 4	DRE-UDMSe proteome WT myelin	LC-MS analysis of PNS myelin by DRE-UDMSe (i.e. with intermediate proteome depth and dynamic range)
Tab 5	add. ID 1D-gel-LC-MS	Proteins additionally identified by 1D-gel-LC-MS (qualitative data only)
Column descriptions (Tab 2 to Tab 4)
A	gene name	Gene name as extracted from description (column B)
B	description	Protein description as parsed from source database (UniprotKB/SwissProt mouse, release 2015-08)
C	IEP	Calculated isoelectric point
D	mw	Calculated molecular weight (Da)
E	max score	Maximum identification score provided by PLGS database searching
F	accession	Database accession number as parsed from source database
G	reported peptides	Number of peptides after ISOQuant processing
H	sequence coverage	Sequence coverage of the protein
I	FDR level	FDR rate at protein level
J	entry	Protein entry as parsed from source database
K-V	WT 1 - WT 12	Relative protein abundance in ppm for each replicate
W	AVERAGE WT	Average relative protein abundance in ppm
X	AVERAGE WT corr	Average relative protein abundance in ppm adjusted to yield 1 mio after removal of contaminants and manual curation of protein quantification
Note
Only 45 proteins were identified in addition (Tab 5) when myelin fractions were subjected to 1D-gel-LC-MS as 24 gel slices per lane, underscoring the high myelin proteome coverage achieved by UDMSe (Tab 2).
These proteins were added to the UDMSe dataset to generate the combined proteome inventory for transcriptome comparison.

## Sheet: 1 Protein ID details
Acquisition mode	Identified peptides mean (SD); n = 12 PLGS	Identified proteins mean (SD); n = 12 PLGS	Pre-normalization TOP3 values spike mean (SD); n = 12 ISOQuant	Post-normalization TOP3 values spike mean (SD); n = 12 ISOQuant	Quantified proteins ISOQuant	% Sequence coverage ISOQuant
UDMSE	13379 (2158)	1102 (156)	149327 (10585)	159860 (13877)	1078	34.3
MSE	3771 (759)	364 (53)	116060 (6083)	124464 (20110)	351	35.5
DRE-UDMSE	7454 (1225)	727 (100)	87502 (12598)	92655 (17648)	554	30.6
Number of peptides (column B) and proteins (column C) identified by database search against the UniProtKB/Swiss-Prot mouse proteome using ProteinLynx Global Server (PLGS). TOP3 intensity values (abitrary units) obtained by averaging the intensity of the three most intense peptides from the spike tryptic digest of ENO1_YEAST before (columns D) and after (column E) peak intensity normalization. Mea…

## Sheet: 2  MSe proteome WT myelin
gene name	description	IEP	mw	max score	accession	reported peptides	sequence coverage	FDR level	entry	WT 1	WT 2	WT 3	WT 4	WT 5	WT 6	WT 7	WT 8	WT 9	WT 10	WT 11	WT 12	AVERAGE WT	AVERAGE WT corr
Mpz	Myelin protein P0 OS=Mus musculus GN=Mpz PE=1 SV=1	9.75	27792.9	24944.5	P27573	10	37.5	0	MYP0_MOUSE	366017	373474	303439	344617	409213	429662	364083	375035	290173	334154	393885	397456	365101	444833
Mbp	Myelin basic protein OS=Mus musculus GN=Mbp PE=1 SV=2	10.05	27167.7	27837.2	P04370	6	21.6	0	MBP_MOUSE	154822	158340	129771	149772	158158	158594	159886	152780	125265	147496	153827	158479	150599	183488
Prx	Periaxin OS=Mus musculus GN=Prx PE=2 SV=1	8.36	147916	57904.6	O55103	61	65.78	0	PRAX_MOUSE	137194	120324	101348	117170	138007	132395	135079	122743	103701	127414	148148	141313	127070	154820
Cd9	CD9 antigen OS=Mus musculus GN=Cd9 PE=1 SV=2	6.96	25828.3	25315.2	P40240	5	26.55	0	CD9_MOUSE	4010.08	7717.82	6192.89	6278.03	6501.33	8874.36	3860.09	7764.5	5787.43	5349.42	5580.43	7575.09	6290.96	7664.8
Tuba4a	Tubulin alpha-4A chain OS=Mus musculus GN=Tuba4a PE=1 SV=1	4.75	50665.8	20525.6	P68368	22	72.32	0	TBA4A_MOUSE	5846.23	5418.33	2386.16	2917.86	5293.24	4949.1	5938.01	5340.51	2455.98	2979.97	5467.63	5378.38	4530.95	5520.44
Nefm	Neurofilament medium polypeptide OS=Mus musculus GN=Nefm PE=1 SV=4	4.56	96030.3	6130.79	P08553	44	58.61	0	NFM_MOUSE	4766.78	5565.72	2938.7	3950.75	4394.48	4420.71	4853.55	5384.19	2893.14	3956.91	4282.45	4490.3	4324.81	5269.27
Sptbn1	Spectrin beta chain, non-erythrocytic 1 OS=Mus musculus GN=Sptbn1 PE=1 SV=2	5.26	275079	1497.77	Q62261	95	52.77	0	SPTB2_MOUSE	4496.53	4075.88	3923.7	4854.63	3817.36	3115.89	4636.73	5019.34	4059.65	3904.33	4478.61	5094.15	4289.74	5226.54
Tuba8	Tubulin alpha-8 chain OS=Mus musculus GN=Tuba8 PE=1 SV=1	4.8	50735.9	15194.9	Q9JJZ2	12	35.63	0	TBA8_MOUSE	5133.98	4901.76	1983.73	2378.9	4672.44	4367.55	5111.92	4650.71	2062.12	2472.27	4758.03	4580.19	3922.8	4779.48
Eno1	Alpha-enolase OS=Mus musculus GN=Eno1 PE=1 SV=3	6.38	47483.1	38525.4	P17182	23	69.59	0	ENOA_MOUSE	3311.33	2871.37	2977.96	3581.01	4005	3803.92	3349.27	2979.67	2976.95	3884.12	4314.25	3974.47	3502.44	4267.32
Sptan1	Spectrin alpha chain, non-erythrocytic 1 OS=Mus musculus GN=Sptan1 PE=1 SV=4	5.04	285396	1233.78	P16546	103	53.84	0	SPTN1_MOUSE	4178.97	3492.97	2424.16	2482.16	3842.09	3618.26	3807.81	3523.4	2720.25	2695.06	4177.51	4069.22	3419.32	4166.05
Eef1a1	Elongation factor 1-alpha 1 OS=Mus musculus GN=Eef1a1 PE=1 SV=3	9.34	50456.1	16893	P10126	17	65.37	0	EF1A1_MOUSE	3192.7	2649.18	2363.69	3051.62	3966.59	3633.65	2984.07	2791.04	2614.38	3340.23	4613.69	4034.25	3269.59	3983.62
Epb41l2	Band 4.1-like protein 2 OS=Mus musculus GN=Epb41l2 PE=1 SV=2	5.15	110453	4475.7	O70318	53	61.64	0	E41L2_MOUSE	3326.17	3325.28	2251.7	2913.99	3452.79	3461.88	3149.67	3328.02	2262.69	3017.51	3614.52	3495.37	3133.3	3817.56
Nefl	Neurofilament light polypeptide OS=Mus musculus GN=Nefl PE=1 SV=5	4.41	61565.6	13802.2	P08551	32	64.27	0	NFL_MOUSE	3744.44	3541.12	2050.66	2367.59	2870.15	2681.52	3767.51	3558.43	2044.2	2538.26	3082.78	2851.44	2924.84	3563.58
Dpysl2	Dihydropyrimidinase-related protein 2 OS=Mus musculus GN=Dpysl2 PE=1 SV=2	5.92	62676.9	17467.4	O08553	30	80.24	0	DPYL2_MOUSE	2345.11	2597.81	2663.31	3270.94	3104.03	2872.83	2122.85	2592.16	2685.84	3257.18	3268.23	3231.47	2834.31	3453.28
Vim	Vimentin OS=Mus musculus GN=Vim PE=1 SV=3	4.86	53744.8	18998	P20152	32	71.24	0	VIME_MOUSE	2815.68	2330.07	1965.82	2477.16	3557.66	3111.05	2752.05	2287.98	2018.19	2707.58	3922.99	3708.92	2804.6	3417.08
Cnp	2',3'-cyclic-nucleotide 3'-phosphodiesterase OS=Mus musculus GN=Cnp PE=1 SV=3	9.26	47522.6	14005.5	P16330	24	66.9	0	CN37_MOUSE	2914.04	2623.49	1768.51	2199.89	3386.31	3177.22	2852.43	2673.03	1865.29	2413.23	3568.59	3466.33	2742.36	3341.25
Tf	Serotransferrin OS=Mus musculus GN=Tf PE=1 SV=1	6.85	78890.9	9854.94	Q921I1	38	66.14	0	TRFE_MOUSE	2541.35	2583.33	2565.15	3250.37	2427.63	2469.02	2563.81	2558.68	2679.74	3354.63	2566.68	2557.76	2676.51	3261.02
Pmp2	Myelin P2 protein OS=Mus musculus GN=Pmp2 PE=2 SV=2	10	15049.5	36115	P24526	10	65.15	0	MYP2_MOUSE	2459.37	2232.58	2357.29	3066.51	2630.68	2688.39	2514.74	2356.29	2539.45	3148.96	2638.63	2624.22	2604.76	3173.6
Map1b	Microtubule-associated protein 1B OS=Mus musculus GN=Map1b PE=1 SV=2	4.57	271510	688.26	P14873	50	33.97	0.0039	MAP1B_MOUSE	3508.81	2257.35	1375.38	2291.8	2821.65	2508.23	3196.29	2313.78	1908.84	2797	3214.16	2615.03	2567.36	3128.03
Fasn	Fatty acid synthase OS=Mus musculus GN=Fasn PE=1 SV=2	6.12	275166	1083.9	P19096	72	46.81	0	FAS_MOUSE	1992.97	1917.61	3165.51	2272.97	2451.85	2354.04	2108.98	1855.45	3183.19	2405.12	2538.21	2283.85	2377.48	2896.68
Acly	ATP-citrate synthase OS=Mus musculus GN=Acly PE=1 SV=1	7.12	120641	939.601	Q91V92	31	39.78	0	ACLY_MOUSE	1534.55	2804.22	2046.53	3476.39	1816.77	1938.18	1561.01	2817.3	2410.61	3549.6	1876.25	2322.68	2346.17	2858.54
Dync1h1	Cytoplasmic dynein 1 heavy chain 1 OS=Mus musculus GN=Dync1h1 PE=1 SV=2	5.98	534784	396.048	Q9JHU4	39	12.75	0.0039	DYHC1_MOUSE	2356.43	2109.23	1758.93	2256.53	2814.27	2525.53	2242.85	2198.93	1938.4	2318.9	2901.17	2699.69	2343.4	2855.17
Plec	Plectin OS=Mus musculus GN=Plec PE=1 SV=3	5.63	536127	325.558	Q9QXS1	15	5.05	0.0039	PLEC_MOUSE	2358.19	2138.3	1731.28	2034.76	2542.18	2476.62	2315.81	2196.81	1838.62	2094.46	2567.15	2656.68	2245.9	2736.37
Flnb	Filamin-B OS=Mus musculus GN=Flnb PE=1 SV=3	5.34	280277	840.928	Q80X90	86	54.46	0	FLNB_MOUSE	2285.36	1778.36	1848.12	2152.34	2315.13	2396.12	2637.9	2039.85	1732.07	2125.68	2491.43	2642.39	2203.73	2684.99
Tkt	Transketolase OS=Mus musculus GN=Tkt PE=1 SV=1	7.23	68314.9	7299.72	P40142	27	67.58	0	TKT_MOUSE	1759.24	1697.34	1786.57	2175.64	2451.5	2363.79	1839.88	1721.14	1811.19	2280.39	2584.02	2524.15	2082.9	2537.78
Tubb5	Tubulin beta-5 chain OS=Mus musculus GN=Tubb5 PE=1 SV=1	4.59	50127.2	42996.4	P99024	26	76.58	0	TBB5_MOUSE	2576.67	2285.79	1090.91	1343.85	2482.55	2339.57	2734.28	2397.7	1064.35	1447.4	2655.84	2459.55	2073.21	2525.96
Nefh	Neurofilament heavy polypeptide OS=Mus musculus GN=Nefh PE=1 SV=3	5.56	117280	2788.58	P19246	33	34.4	0	NFH_MOUSE	2084.46	1986.66	1554.33	1876.33	2277.74	1837.87	2093.02	2005.17	1627.05	2053.83	2460.37	1964.13	1985.08	2418.59
Gapdh	Glyceraldehyde-3-phosphate dehydrogenase OS=Mus musculus GN=Gapdh PE=1 SV=2	8.35	36095.2	17682	P16858	14	63.96	0	G3P_MOUSE	1982.88	1835.62	1502.57	1475.19	2214.61	2306.08	1991.98	1702.88	1335.55	1554.57	2324.74	2181.52	1867.35	2275.15
Col1a1	Collagen alpha-1(I) chain OS=Mus musculus GN=Col1a1 PE=1 SV=4	5.51	139059	691.909	P11087	15	16.31	0.0039	CO1A1_MOUSE	2243.9	2324.06	1295.98	1724.43	1630.42	1698.86	2216.44	2437.66	1327.17	1902.25	1717.49	1809.09	1860.65	2266.98
Acta1	Actin, alpha skeletal muscle OS=Mus musculus GN=Acta1 PE=1 SV=1	5.07	42393.3	6459.72	P68134	16	62.07	0	ACTS_MOUSE	2030.04	1909.26	1317.58	1562.23	2007.29	2043.04	1991.98	2034.8	1341.49	1646.22	2113.12	2097.31	1841.2	2243.28
Anxa2	Annexin A2 OS=Mus musculus GN=Anxa2 PE=1 SV=2	7.69	38961.4	15717.4	P07356	23	69.91	0	ANXA2_MOUSE	2168.41	1938.01	1306.02	1513.49	1809.76	1657.08	2131.06	2062.4	1416.93	1622.44	1798.89	1782.11	1767.22	2153.15
Mag	Myelin-associated glycoprotein OS=Mus musculus GN=Mag PE=1 SV=2	4.85	70115.2	2802.84	P20917	14	32.75	0	MAG_MOUSE	1621.68	1903.87	1205.25	1537.96	1786.69	1890.58	1549.58	1856.06	1279.95	1511.79	1885.41	1631.37	1638.35	1996.14
Atp1a1	Sodium/potassium-transporting ATPase subunit alpha-1 OS=Mus musculus GN=Atp1a1 PE=1 SV=1	5.14	114294	3835.49	Q8VDN2	40	45.65	0	AT1A1_MOUSE	1588.78	1447.84	1184.73	1602.49	1421.67	1303.51	1634.24	1462.13	1270.99	1525.95	1478.57	1391.2	1442.67	1757.73
C3	Complement C3 OS=Mus musculus GN=C3 PE=1 SV=3	6.27	188024	701.795	P01027	54	42.81	0.0039	CO3_MOUSE	1366.5	1333.81	1440.3	1702.66	1397.6	1231.8	1321.94	1335.36	1409.65	1672.11	1500.57	1243.89	1413.01	1721.59
Flna	Filamin-A OS=Mus musculus GN=Flna PE=1 SV=5	5.61	284073	483.316	Q8BTM8	48	32.57	0.0039	FLNA_MOUSE	991.087	999.361	2968.92	999.993	1054.39	968.678	980.494	1073.56	3408.47	1054.52	1125.1	1284.33	1409.07	1716.79
Plp1	Myelin proteolipid protein OS=Mus musculus GN=Plp1 PE=1 SV=2	8.29	30875.6	8033.16	P60202	6	23.1	0	MYPR_MOUSE	1439.07	1262.39	1085.51	1396.95	1560.21	1554.67	1472.08	1235.75	1143.38	1386.92	1665.2	1605.93	1400.67	1706.56
Hspa8	Heat shock cognate 71 kDa protein OS=Mus musculus GN=Hspa8 PE=1 SV=1	5.2	71099.3	5553.88	P63017	28	55.26	0	HSP7C_MOUSE	1655.12	1372.39	971.227	1266.21	1480.26	1363.12	1583.54	1452.09	1042.56	1340.13	1552.51	1516.28	1382.95	1684.97
Col1a2	Collagen alpha-2(I) chain OS=Mus musculus GN=Col1a2 PE=2 SV=2	9.5	130070	663.989	Q01149	11	12.1	0.0039	CO1A2_MOUSE	1482.35	1570.01	890.842	1213.01	1323.58	1375.51	1663.15	1534.68	984.827	1228.26	1427.87	1394.88	1340.75	1633.54
Atp5b	ATP synthase subunit beta, mitochondrial OS=Mus musculus GN=Atp5b PE=1 SV=2	5.03	56300.6	8247.44	P56480	22	62	0	ATPB_MOUSE	1520.16	1321.59	921.492	1160.72	1482.67	1375.97	1521.29	1387.4	982.482	1281.35	1621.73	1444.54	1335.12	1626.68
Hspg2	Basement membrane-specific heparan sulfate proteoglycan core protein OS=Mus musculus GN=Hspg2 PE=1 SV=1	5.85	408103	356.259	Q05793	18	8.63	0.0039	PGBM_MOUSE	1224.92	901.582	1067.31	1305.64	1624.64	1541.81	1236.7	1181.17	1139.62	1282.03	1755.7	1755.98	1334.76	1626.25
Cltc	Clathrin heavy chain 1 OS=Mus musculus GN=Cltc PE=1 SV=3	5.35	193325	1032.36	Q68FD5	46	39.94	0	CLH1_MOUSE	1586.49	1433.37	946.752	1085.35	1378.2	1366.7	1598.54	1477.76	973.344	1172.83	1506.54	1451.3	1331.43	1622.19
Map4	Microtubule-associated protein 4 OS=Mus musculus GN=Map4 PE=1 SV=3	4.7	118000	2365.14	P27546	44	71.47	0	MAP4_MOUSE	1473.05	1336.91	914.592	1147.18	1478.7	1289.45	1453.09	1477.12	943.583	1189.98	1448.88	1348.6	1291.76	1573.86
Aldoa	Fructose-bisphosphate aldolase A OS=Mus musculus GN=Aldoa PE=1 SV=2	8.07	39812.2	10879.5	P05064	22	80.22	0	ALDOA_MOUSE	1181.35	1107.04	896.557	1107.17	1565.12	1515.64	1176.07	1093.36	945.316	1170.06	1665.25	1660.01	1256.91	1531.4
Ckm	Creatine kinase M-type OS=Mus musculus GN=Ckm PE=2 SV=1	6.62	43273.2	15853.1	P07310	17	68.77	0	KCRM_MOUSE	735.099	617.971	826.881	1096.19	1968.91	1900.67	621.68	691.492	893.496	1110.27	2064.98	1965.96	1207.8	1471.56
Pkm	Pyruvate kinase PKM OS=Mus musculus GN=Pkm PE=1 SV=4	7.21	58415.3	5222.35	P52480	25	70.06	0	KPYM_MOUSE	1434.54	1200.56	840.944	1050.89	1278.7	1178.17	1466.58	1241.63	882.816	1161.06	1358.68	1241.66	1194.69	1455.59
Actbl2	Beta-actin-like protein 2 OS=Mus musculus GN=Actbl2 PE=1 SV=1	5.15	42346.5	6889.97	Q8BFZ3	8	26.6	0	ACTBL_MOUSE	1271.62	1223.56	911.913	1078.77	1326.64	1181.38	1245.87	1300.45	891.239	1114.92	1446.61	1230.74	1185.31	1444.16
Tubb3	Tubulin beta-3 chain OS=Mus musculus GN=Tubb3 PE=1 SV=1	4.63	50875	19201.3	Q9ERD7	25	72	0	TBB3_MOUSE	1300.33	1354.85	704.77	765.656	1338.86	1416.6	1342.45	1418.88	699.256	725.454	1386.47	1394.77	1154.03	1406.05
Gstm1	Glutathione S-transferase Mu 1 OS=Mus musculus GN=Gstm1 PE=1 SV=2	8.12	26084.1	2117.69	P10649	11	54.13	0	GSTM1_MOUSE	1168.95	908.824	1122.61	1182.22	1145.41	1022.6	1160.63	1082.37	1060.74	1278.41	1175.61	1115.77	1118.68	1362.98
Vcp	Transitional endoplasmic reticulum ATPase OS=Mus musculus GN=Vcp PE=1 SV=4	4.95	90006.3	730.127	Q01853	21	42.31	0.0039	TERA_MOUSE	1228.32	1255.73	1258.29	1883.08	735.153	547.872	1217.82	1154.18	1217.6	1395.74	684.944	721.011	1108.31	1350.35
Myh9	Myosin-9 OS=Mus musculus GN=Myh9 PE=1 SV=4	5.38	227570	418.326	Q8VDD5	30	21.33	0.0039	MYH9_MOUSE	1278.34	971.069	730.18	1045.79	1304.15	1230.46	1278.72	1033.91	812.449	997.967	1406.08	1171.06	1105.01	1346.33
Anxa6	Annexin A6 OS=Mus musculus GN=Anxa6 PE=1 SV=3	5.18	76341.7	3084.15	P14824	42	70.28	0	ANXA6_MOUSE	1200.02	1113.13	761.803	950.819	1261.38	1182.2	1154.35	1147.36	788.601	1057.62	1305.26	1297.94	1101.71	1342.3
Prph	Peripherin OS=Mus musculus GN=Prph PE=1 SV=2	5.25	54381.7	7416.53	P15331	32	62.11	0	PERI_MOUSE	1211.33	1120.99	625.642	863.368	1170.5	1118.47	1202.13	1158.14	665.765	891.22	1243.21	1266.32	1044.76	1272.92
Prdx1	Peroxiredoxin-1 OS=Mus musculus GN=Prdx1 PE=1 SV=1	8.23	22404.6	10409.1	P35700	12	67.34	0	PRDX1_MOUSE	1006.51	892.777	842.237	1041.27	1125.13	1147.08	1002.82	920.979	912.66	1079.88	1244.11	1140.41	1029.66	1254.52
Tubb2b	Tubulin beta-2B chain OS=Mus musculus GN=Tubb2b PE=1 SV=1	4.59	50409.4	40220.6	Q9CWF2	25	72.58	0	TBB2B_MOUSE	1253.02	1119.69	531.916	658.455	1237.27	1170.79	1315.74	1169.95	505.982	712.737	1325.57	1225.44	1018.88	1241.39
Slc44a1	Choline transporter-like protein 1 OS=Mus musculus GN=Slc44a1 PE=1 SV=3	8.72	74606.9	1268.42	Q6X893	15	28.02	0	CTL1_MOUSE	843.452	760.843	924.961	1103.53	1247.58	1107.95	890.29	735.878	891.577	1077.92	1265.56	1185.88	1002.95	1221.98
Cd81	CD81 antigen OS=Mus musculus GN=Cd81 PE=1 SV=2	5.44	26498.9	14736.6	P35762	4	30.93	0	CD81_MOUSE	843.781	890.781	874.474	1090.29	1096.12	1123.35	794.136	884.766	875.941	1107.72	1084.59	1163.4	985.78	1201.06
Atp5a1	ATP synthase subunit alpha, mitochondrial OS=Mus musculus GN=Atp5a1 PE=1 SV=1	9.52	59866.8	5229.08	Q03265	21	48.46	0	ATPA_MOUSE	1005.43	961.485	729.061	890.621	1165.33	1106.08	988.559	980.921	754.647	856.114	1179.08	1202.93	985.021	1200.13
Tubb2a	Tubulin beta-2A chain OS=Mus musculus GN=Tubb2a PE=1 SV=1	4.59	50306.3	40390.5	Q7TMM9	25	72.58	0	TBB2A_MOUSE	1181.23	1052.74	510.623	629.411	1183.07	1119.37	1235.32	1096.4	484.281	681.087	1271.74	1172.25	968.128	1179.55
Aco2	Aconitate hydratase, mitochondrial OS=Mus musculus GN=Aco2 PE=1 SV=1	7.83	86205	2101.77	Q99KI0	31	54.23	0	ACON_MOUSE	638.973	566.052	848.97	1218.08	1207.08	945.982	621.316	621.706	1134.15	1340.29	1058.58	1287.02	957.351	1166.42
Gsn	Gelsolin OS=Mus musculus GN=Gsn PE=1 SV=3	5.76	86340.9	1269.23	P13020	17	35.77	0	GELS_MOUSE	1156.06	1099.41	828.733	915.981	770.468	735.851	1167.25	1143.26	767.385	1076.22	853.294	779.372	941.107	1146.63
Atp1a3	Sodium/potassium-transporting ATPase subunit alpha-3 OS=Mus musculus GN=Atp1a3 PE=1 SV=1	5.09	113117	2831.68	Q6PIC6	33	45.8	0	AT1A3_MOUSE	1009.86	1019.69	657.074	850.727	1089.67	1033.97	1110.99	971.07	640.33	840.494	1046.2	974.215	937.025	1141.66
Tln1	Talin-1 OS=Mus musculus GN=Tln1 PE=1 SV=2	5.76	271989	315.341	P26039	19	15.43	0.0039	TLN1_MOUSE	881.907	945.296	778.03	774.702	922.985	1095.99	820.375	938.565	886.552	748.139	998.046	1038.98	902.463	1099.55
Pllp	Plasmolipin OS=Mus musculus GN=Pllp PE=2 SV=1	9.57	19915.6	6526.48	Q9DCU2	2	21.43	0	PLLP_MOUSE	963.499	976.451	747.398	909.949	873.978	838.625	925.453	955.276	759.386	927.942	981.344	909.586	897.407	1093.39
Ppia	Peptidyl-prolyl cis-trans isomerase A OS=Mus musculus GN=Ppia PE=1 SV=2	8	18142.5	22489	P17742	9	64.63	0	PPIA_MOUSE	933.621	964.142	782.122	978.724	804.944	830.71	909.977	1022.05	803.667	975.258	887.596	864.731	896.462	1092.24
Tubb4b	Tubulin beta-4B chain OS=Mus musculus GN=Tubb4b PE=1 SV=1	4.6	50287.4	39412	P68372	26	78.65	0	TBB4B_MOUSE	1120.97	989.781	487.527	619.196	1036.86	1024.52	1180	968.183	494.623	659.855	1074.79	1037.96	891.189	1085.81
Serpinh1	Serpin H1 OS=Mus musculus GN=Serpinh1 PE=1 SV=3	9.19	46647.7	1207.84	P19324	14	43.41	0	SERPH_MOUSE	443.926	373.387	2511.23	521.601	485.976	448.744	459.903	395.269	2774	589.266	471.74	501.588	831.386	1012.95
Bcas1	Breast carcinoma-amplified sequence 1 homolog OS=Mus musculus GN=Bcas1 PE=2 SV=3	5.82	67833.8	1704.58	Q80YN3	10	22.75	0	BCAS1_MOUSE	772.712	717.714	697.453	748.237	851.456	768.257	792.085	778.729	716.156	844.597	778.305	766.41	769.343	937.355
Cs	Citrate synthase, mitochondrial OS=Mus musculus GN=Cs PE=1 SV=1	8.72	52021.9	1338.62	Q9CZU6	12	30.6	0	CISY_MOUSE	436.166	698.673	712.078	934.166	885.315	930.084	356.668	787.039	818.129	1026.92	789.963	847.437	768.553	936.393
Col14a1	Collagen alpha-1(XIV) chain OS=Mus musculus GN=Col14a1 PE=2 SV=2	4.8	194211	368.423	Q80X19	18	15.47	0.0039	COEA1_MOUSE	785.105	657.33	582.69	653.317	848.96	783.23	736.797	684.467	715.568	767.838	960.826	726.021	741.846	903.853
Col6a1	Collagen alpha-1(VI) chain OS=Mus musculus GN=Col6a1 PE=2 SV=1	5.03	109630	1007.58	Q04857	18	26.05	0	CO6A1_MOUSE	707.01	676.05	551.128	728.609	843.068	769.385	691.395	747.539	546.62	734.816	853.772	855.786	725.431	883.854
Ndrg1	Protein NDRG1 OS=Mus musculus GN=Ndrg1 PE=1 SV=1	5.65	43465	6772.3	Q62433	10	46.7	0	NDRG1_MOUSE	1018.22	1191.25	362.599	409.706	642.826	671.234	1042.69	1205.33	375.983	429.265	646.569	615.631	717.609	874.323
Rtn4	Reticulon-4 OS=Mus musculus GN=Rtn4 PE=1 SV=2	4.27	127127	371.548	Q99P72	8	13.86	0.0039	RTN4_MOUSE	784.685	666.228	575.038	543.603	804.226	656.691	777.748	921.534	582.391	795.933	861.132	628.315	716.46	872.924
Msn	Moesin OS=Mus musculus GN=Msn PE=1 SV=3	6.18	67881.2	1815.69	P26041	28	54.59	0	MOES_MOUSE	696.4	680.343	586.915	749.866	820.822	734.961	607.629	733.336	644.225	692.453	808.079	779.908	711.245	866.569
Col6a2	Collagen alpha-2(VI) chain OS=Mus musculus GN=Col6a2 PE=2 SV=3	5.97	111475	427.535	Q02788	12	16.73	0.0039	CO6A2_MOUSE	591.819	674.806	438.229	587.328	934.1	888.596	610.683	704.153	506.387	610.676	933.475	908.911	699.097	851.769
Eno3	Beta-enolase OS=Mus musculus GN=Eno3 PE=1 SV=3	6.81	47367.1	13634.7	P21550	15	52.76	0	ENOB_MOUSE	501.484	428.123	459.062	608.14	1051.02	871.845	449.412	461.925	529.128	629.444	1124.4	979.772	674.479	821.775
Gdi2	Rab GDP dissociation inhibitor beta OS=Mus musculus GN=Gdi2 PE=1 SV=1	5.85	51050.5	5117.81	Q61598	29	73.48	0	GDIB_MOUSE	765.81	596.931	587.959	628.923	681.403	614.915	765.853	564.974	596.987	727.198	768.626	676.68	664.688	809.846
Cap1	Adenylyl cyclase-associated protein 1 OS=Mus musculus GN=Cap1 PE=1 SV=4	7.3	51907.1	4635.31	P40124	22	60.76	0	CAP1_MOUSE	600.109	602.933	623.792	686.532	679.906	685.873	633.936	581.705	660.145	747.884	708.956	739.885	662.638	807.348
Epb41l3	Band 4.1-like protein 3 OS=Mus musculus GN=Epb41l3 PE=1 SV=1	5.03	103794	840.135	Q9WV92	21	34.55	0	E41L3_MOUSE	685.733	656.361	437.418	569.781	662.747	614.526	672.878	664.262	455.083	577.187	708.594	669.571	614.512	748.711
Nid1	Nidogen-1 OS=Mus musculus GN=Nid1 PE=1 SV=2	5.08	139389	342.652	P10493	9	13.41	0.0039	NID1_MOUSE	578.003	462.486	432.502	553.124	671.686	678.242	546.75	637.206	467.922	673.529	733.908	719.48	596.236	726.445
Rab10	Ras-related protein Rab-10 OS=Mus musculus GN=Rab10 PE=1 SV=1	8.57	22769.1	1721.93	P61027	5	30	0	RAB10_MOUSE	561.856	542.031	485.544	654.019	626.145	610.319	526.474	569.551	462.814	683.741	622.836	616.922	580.188	706.891
Hadha	Trifunctional enzyme subunit alpha, mitochondrial OS=Mus musculus GN=Hadha PE=1 SV=1	9.46	83354.3	1216.98	Q8BMS1	22	46.4	0	ECHA_MOUSE	500.112	527.995	522.134	580.152	626.061	639.364	500.65	513.856	532.164	610.498	638.298	665.92	571.434	696.226
Igh-3	Ig gamma-2B chain C region OS=Mus musculus GN=Igh-3 PE=1 SV=3	6.07	45000.8	3328.49	P01867	10	35.89	0	IGG2B_MOUSE	398.745	332.524	583.369	733.345	654.97	606.322	386.984	334.489	595.732	771.305	710.617	666.772	564.598	687.897
Cadm4	Cell adhesion molecule 4 OS=Mus musculus GN=Cadm4 PE=1 SV=1	5.88	43179.6	1941.95	Q8R464	11	37.89	0	CADM4_MOUSE	564.647	512.189	416.347	499.699	625.152	559.003	574.206	487.404	430.088	519.261	629.88	622.925	536.733	653.947
Aldh2	Aldehyde dehydrogenase, mitochondrial OS=Mus musculus GN=Aldh2 PE=1 SV=1	7.49	57050.9	1134.55	P47738	19	53.18	0	ALDH2_MOUSE	675.539	527.115	454.524	600.697	451.45	490.421	643.387	560.757	457.857	610.487	493.555	470.014	536.317	653.44
Lamc1	Laminin subunit gamma-1 OS=Mus musculus GN=Lamc1 PE=1 SV=2	4.9	182944	304.771	P02468	6	6.29	0.0039	LAMC1_MOUSE	524.116	559.324	412.418	510.802	572.314	554.879	544.163	557.586	408.055	461.99	578.229	575.006	521.573	635.477
Tppp3	Tubulin polymerization-promoting protein family member 3 OS=Mus musculus GN=Tppp3 PE=1 SV=1	9.52	19136.6	11881.3	Q9CRB6	9	39.77	0	TPPP3_MOUSE	538.517	567.546	428.191	574.06	464.692	476.563	561.669	471.519	518.764	593.494	500.184	514.076	517.44	630.44
Hspa12a	Heat shock 70 kDa protein 12A OS=Mus musculus GN=Hspa12a PE=1 SV=1	6.32	75213.7	2192.77	Q8K0U4	19	41.93	0	HS12A_MOUSE	609.503	515.402	346.814	461.305	555.117	499.905	599.805	512.703	379.646	522.239	610.611	528.248	511.775	623.538
Eef2	Elongation factor 2 OS=Mus musculus GN=Eef2 PE=1 SV=2	6.39	96283.7	991.47	P58252	26	39.51	0	EF2_MOUSE	487.461	527.58	466.523	452.969	523.481	542.757	500.816	502.378	467.748	471.67	576.252	607.871	510.626	622.138
Dpysl3	Dihydropyrimidinase-related protein 3 OS=Mus musculus GN=Dpysl3 PE=1 SV=1	6.03	62335.6	3218.86	Q62188	20	64.91	0	DPYL3_MOUSE	441.973	404.887	409.834	526.196	590.98	519.093	462.424	470.44	449.774	587.468	668.598	581.188	509.404	620.65
Hsp90ab1	Heat shock protein HSP 90-beta OS=Mus musculus GN=Hsp90ab1 PE=1 SV=3	4.78	83623.5	1309.95	P11499	23	40.33	0	HS90B_MOUSE	686.061	613.347	271.887	320.036	534.586	500.289	688.891	641.13	283.682	340.664	579.143	530.969	499.224	608.246
Got2	Aspartate aminotransferase, mitochondrial OS=Mus musculus GN=Got2 PE=1 SV=1	9.26	47810.7	1963.74	P05202	17	53.49	0	AATM_MOUSE	560.995	554.015	378.495	492.783	481.457	430.998	567.275	571.546	391.626	510.005	494.011	493.223	493.869	601.722
Nme2	Nucleoside diphosphate kinase B OS=Mus musculus GN=Nme2 PE=1 SV=1	7.37	17477.2	8195.61	Q01768	11	75	0	NDKB_MOUSE	520.252	472.901	411.97	490.15	454	440.809	547.558	543.362	431.912	511.509	462.478	472.356	479.938	584.749
Ywhaz	14-3-3 protein zeta/delta OS=Mus musculus GN=Ywhaz PE=1 SV=1	4.53	27942.3	7986.27	P63101	13	53.88	0	1433Z_MOUSE	808.357	624.853	214.097	279.098	462.127	414.044	741.424	641.38	245.815	295.351	481.98	466.421	472.912	576.189
Atp1b1	Sodium/potassium-transporting ATPase subunit beta-1 OS=Mus musculus GN=Atp1b1 PE=1 SV=1	8.78	35593.8	2662.66	P14094	10	40.79	0	AT1B1_MOUSE	555.743	464.184	328.508	425.381	488.931	464.89	564.301	471.833	335.722	441.87	533.589	495.793	464.229	565.609
Fga	Fibrinogen alpha chain OS=Mus musculus GN=Fga PE=2 SV=1	5.69	88170.7	648.8	E9PV24	11	22.69	0.0039	FIBA_MOUSE	455.211	414.267	379.58	445.868	492.258	476.972	470.361	435.764	400.833	478.99	543.902	500.648	457.888	557.883
Mdh2	Malate dehydrogenase, mitochondrial OS=Mus musculus GN=Mdh2 PE=1 SV=3	8.82	36067.7	7780.62	P08249	13	50.89	0	MDHM_MOUSE	419.33	434.159	324.398	430.347	588.928	558.714	273.373	445.641	344.054	446.144	592.54	594.398	454.336	553.555
Canx	Calnexin OS=Mus musculus GN=Canx PE=1 SV=1	4.29	67677.2	705.456	P35564	12	25.04	0.0039	CALX_MOUSE	491.355	516.646	301.85	349.824	480.358	450.279	559.821	549.639	288.639	390.765	465.293	496.054	445.044	542.234
Ckb	Creatine kinase B-type OS=Mus musculus GN=Ckb PE=1 SV=1	5.29	42998.5	1130.69	Q04447	9	38.58	0	KCRB_MOUSE	515.512	510.543	308.469	385.789	488.256	410.922	496.742	497.142	315.869	384.24	504.871	467.682	440.503	536.702
Atp12a	Potassium-transporting ATPase alpha chain 2 OS=Mus musculus GN=Atp12a PE=1 SV=3	5.9	115468	420.662	Q9Z1W8	5	5.12	0.0039	AT12A_MOUSE	451.232	389.182	309.86	375.516	449.944	401.373	471.974	440.42	314.528	335.466	487.855	462.367	407.477	496.463
Cat	Catalase OS=Mus musculus GN=Cat PE=1 SV=4	7.79	60080.6	1458.43	P24270	17	50.28	0	CATA_MOUSE	457.57	409.14	362.776	413.408	356.852	336.654	481.718	424.379	411.886	446.16	381.302	361.287	403.594	491.733
Gdi1	Rab GDP dissociation inhibitor alpha OS=Mus musculus GN=Gdi1 PE=1 SV=3	4.76	51092	2750.59	P50396	14	44.97	0	GDIA_MOUSE	450.335	328.216	296.459	686.594	505.203	327.335	314.951	356.68	511.025	455.834	295.52	296.724	402.073	489.879
Rac1	Ras-related C3 botulinum toxin substrate 1 OS=Mus musculus GN=Rac1 PE=1 SV=1	8.57	21849.3	6654.43	P63001	7	40.63	0	RAC1_MOUSE	404.723	341.984	261.883	305.993	540.99	520.27	389.053	349.854	263.192	320.905	553.348	564.547	401.395	489.053
	Ig gamma-2A chain C region secreted form OS=Mus musculus PE=1 SV=1	8.2	37109.2	1676.71	P01864	5	17.31	0	GCAB_MOUSE	312.85	275.102	436.297	529.356	412.225	398.199	305.302	283.914	447.157	567.087	428.267	417.094	401.071	488.658
Ptrf	Polymerase I and transcript release factor OS=Mus musculus GN=Ptrf PE=1 SV=1	5.26	43953.7	2236.1	O54724	10	33.42	0	PTRF_MOUSE	480.392	458.773	249.718	324.121	429.65	401.031	457.542	450.692	267.395	351.434	455.751	441.618	397.343	484.116
Atp1a2	Sodium/potassium-transporting ATPase subunit alpha-2 OS=Mus musculus GN=Atp1a2 PE=1 SV=1	5.23	113529	2558.86	Q6PIE5	32	38.43	0	AT1A2_MOUSE	422.312	371.034	349.44	396.525	403.81	379.45	410.505	479.508	349.377	255.494	426.879	431.131	389.622	474.709
Uqcrc1	Cytochrome b-c1 complex subunit 1, mitochondrial OS=Mus musculus GN=Uqcrc1 PE=1 SV=2	5.76	53479.1	970.562	Q9CZ13	15	48.33	0	QCR1_MOUSE	412.089	364.964	316.975	374.484	428.115	394.793	379.304	396.679	330.982	368.349	418.711	426.375	384.318	468.247
Eef1a2	Elongation factor 1-alpha 2 OS=Mus musculus GN=Eef1a2 PE=1 SV=1	9.35	50796.4	3935.77	P62631	16	62.63	0	EF1A2_MOUSE	339.441	299.8	285.998	363.76	455.07	426.951	326.176	306.897	312.575	394.657	491.123	474.731	373.098	454.577
Dcn	Decorin OS=Mus musculus GN=Dcn PE=2 SV=1	8.85	40151.2	1243.07	P28654	8	27.4	0	PGS2_MOUSE	394.49	343.108	276.171	342.471	429.821	399.713	395.664	357.437	287.242	347.117	450.341	431.395	371.248	452.322
Actn4	Alpha-actinin-4 OS=Mus musculus GN=Actn4 PE=1 SV=1	5.09	105434	424.82	P57780	18	28.4	0.0039	ACTN4_MOUSE	435.394	367.112	234.385	287.268	412.457	383.36	432.252	365.793	238.867	314.097	462.196	404.975	361.513	440.462
Ca3	Carbonic anhydrase 3 OS=Mus musculus GN=Ca3 PE=1 SV=3	6.99	29651.5	3331.95	P16015	12	65.38	0	CAH3_MOUSE	207.061	230.669	535.959	593.635	287.022	256.5	201.109	228.449	572.092	627.032	300.623	294.167	361.193	440.072
Slc25a4	ADP/ATP translocase 1 OS=Mus musculus GN=Slc25a4 PE=1 SV=4	10.02	33132.4	5394.02	P48962	13	50.67	0	ADT1_MOUSE	424.094	396.563	237.828	293.002	388.971	401.26	433.234	410.057	239.283	292.779	399.919	410.487	360.623	439.377
Tubb4a	Tubulin beta-4A chain OS=Mus musculus GN=Tubb4a PE=1 SV=3	4.59	50042.1	31026.3	Q9D6F9	25	81.76	0	TBB4A_MOUSE	437.273	388.722	206.455	237.744	413.756	405.515	458.138	385.772	201.485	254.027	426.313	411.653	352.238	429.161
Vat1l	Synaptic vesicle membrane protein VAT-1 homolog-like OS=Mus musculus GN=Vat1l PE=2 SV=2	4.79	46159.6	1859.85	Q80TB8	14	47.48	0	VAT1L_MOUSE	495.547	394.663	234.127	306.903	336.088	293.322	513.86	370.763	243.047	330.878	351.983	316.667	348.987	425.201
Atp2a1	Sarcoplasmic/endoplasmic reticulum calcium ATPase 1 OS=Mus musculus GN=Atp2a1 PE=1 SV=1	4.95	110794	593.228	Q8R429	16	24.95	0.0039	AT2A1_MOUSE	164.349	220.562	204.415	237.774	590.01	558.787	167.18	222.573	210.374	254.366	752.891	540.316	343.633	418.677
Vwa5a	von Willebrand factor A domain-containing protein 5A OS=Mus musculus GN=Vwa5a PE=1 SV=2	6.13	87884.3	587.297	Q99KC8	20	38.59	0.0039	VMA5A_MOUSE	334.164	280.174	452.76	348.102	298.09	277.014	325.824	297.386	455.803	358.362	321.413	294.833	336.994	410.588
Vcl	Vinculin OS=Mus musculus GN=Vcl PE=1 SV=4	5.65	117288	359.845	Q64727	10	14.17	0.0039	VINC_MOUSE	366.076	391.14	312.152	277.409	309.751	389.824	374.772	384.903	274.363	270.525	339.134	352.396	336.871	410.438
Ca2	Carbonic anhydrase 2 OS=Mus musculus GN=Ca2 PE=1 SV=4	6.53	29146.6	4104.61	P00920	10	59.23	0	CAH2_MOUSE	300.532	267.704	445.57	556.239	210.963	209.153	298.704	280.587	443.437	538.131	224.957	206.537	331.876	404.353
Fgb	Fibrinogen beta chain OS=Mus musculus GN=Fgb PE=2 SV=1	6.71	55437.2	945.26	Q8K0E8	15	48.23	0	FIBB_MOUSE	299.491	346.017	255.82	315.217	342.753	324.07	318.776	363.095	293.04	347.187	339.625	378.379	326.956	398.358
Fgg	Fibrinogen gamma chain OS=Mus musculus GN=Fgg PE=1 SV=1	5.44	50075.8	1200.09	Q8VCM7	13	45.64	0	FIBG_MOUSE	312.697	294.479	265.157	325.137	375.202	330.393	299.57	300.926	280.037	341.328	395.017	367.131	323.923	394.662
Acaa2	3-ketoacyl-CoA thiolase, mitochondrial OS=Mus musculus GN=Acaa2 PE=1 SV=3	8.07	42286.2	1357.13	Q8BWT1	14	61.46	0	THIM_MOUSE	312.92	300.471	272.34	590.348	295.145	263.173	274.172	252.7	224.811	393.982	364.513	300.144	320.393	390.362
Apoa1	Apolipoprotein A-I OS=Mus musculus GN=Apoa1 PE=1 SV=2	5.39	30615.6	3588.52	Q00623	16	49.24	0	APOA1_MOUSE	421.685	390.864	181.52	238.235	325.802	319.284	428.646	401.507	182.022	235.611	346.354	344.985	318.043	387.498
Uqcrc2	Cytochrome b-c1 complex subunit 2, mitochondrial OS=Mus musculus GN=Uqcrc2 PE=1 SV=1	9.57	48292	788.914	Q9DB77	15	44.15	0.0039	QCR2_MOUSE	326.397	294.277	239.867	289.328	353.891	324.014	327.064	300.657	238.409	309.906	365.995	350.31	310.01	377.711
Sept2	Septin-2 OS=Mus musculus GN=Sept2 PE=1 SV=2	6.09	41753.7	1366.17	P42208	12	50.69	0	SEPT2_MOUSE	321.922	265.231	254.869	315.078	375.876	319.751	309.446	293.464	255.699	289.245	353.614	335.94	307.511	374.667
Cfl1	Cofilin-1 OS=Mus musculus GN=Cfl1 PE=1 SV=3	8.22	18787.7	11078.1	P18760	10	62.05	0	COF1_MOUSE	300.26	406.102	331.997	298.272	254.687	300.188	278.88	378.954	305.901	317.721	221.608	262.37	304.745	371.296
Atp1a4	Sodium/potassium-transporting ATPase subunit alpha-4 OS=Mus musculus GN=Atp1a4 PE=1 SV=3	5.37	116085	1629.72	Q9WV27	10	12.89	0	AT1A4_MOUSE	293.688	278.659	291.42	307.429	325.301	340.298	300.167	274.317	262.934	372.907	292.594	297.32	303.086	369.275
Slc25a3	Phosphate carrier protein, mitochondrial OS=Mus musculus GN=Slc25a3 PE=1 SV=1	9.49	40088.6	977.956	Q8VEM8	12	38.94	0	MPCP_MOUSE	325.868	293.207	218.924	257.824	367.979	320.356	333.022	276.262	212.008	264.909	351.177	357.548	298.257	363.392
Atp5o	ATP synthase subunit O, mitochondrial OS=Mus musculus GN=Atp5o PE=1 SV=1	10.41	23420.6	3324.73	Q9DB20	7	44.6	0	ATPO_MOUSE	316.141	249.518	285.399	397.522	256.065	159.087	321.446	301.408	313.323	484.397	318.401	175.585	298.191	363.311
Jup	Junction plakoglobin OS=Mus musculus GN=Jup PE=1 SV=3	5.69	82542.3	2028.44	Q02257	12	23.36	0	PLAK_MOUSE	176.172	190.622	829.081	258.127	130.247	136.23	185.544	223.378	745.399	268.575	154.882	135.583	286.153	348.645
Cryab	Alpha-crystallin B chain OS=Mus musculus GN=Cryab PE=1 SV=2	6.92	20068.8	5184.33	P23927	8	54.86	0	CRYAB_MOUSE	253.483	308.638	243.532	281.004	288.103	328.588	254.499	320.143	245.092	275.201	288.477	335.021	285.148	347.42
Ogdh	2-oxoglutarate dehydrogenase, mitochondrial OS=Mus musculus GN=Ogdh PE=1 SV=3	6.36	117647	329.349	Q60597	4	6.16	0.0039	ODO1_MOUSE	259.278	222.776	180.983	277.333	324.949	296.437	258.861	255.523	287.516	319.118	384.057	317.849	282.057	343.653
Gpi	Glucose-6-phosphate isomerase OS=Mus musculus GN=Gpi PE=1 SV=4	8.2	62995.1	546.49	P06745	8	22.94	0.0039	G6PI_MOUSE	196.641	179.998	296.882	348.314	335.421	334.679	194.808	183.125	293.148	367.849	354.848	261.427	278.928	339.842
Ehd2	EH domain-containing protein 2 OS=Mus musculus GN=Ehd2 PE=1 SV=1	6.05	61345.7	1593.76	Q8BH64	19	52.12	0	EHD2_MOUSE	294.769	275.763	194.559	259.484	287.198	295.762	288.496	277.725	192.328	264.817	354.563	305.809	274.273	334.169
Ywhae	14-3-3 protein epsilon OS=Mus musculus GN=Ywhae PE=1 SV=1	4.44	29345	5580.07	P62259	14	56.86	0	1433E_MOUSE	443.572	357.998	132.454	174.642	256.306	226.658	422.291	368.557	153.332	196.621	271.034	249.112	271.048	330.241
Gnb1	Guanine nucleotide-binding protein G(I)/G(S)/G(T) subunit beta-1 OS=Mus musculus GN=Gnb1 PE=1 SV=3	5.54	38175.4	3131.66	P62874	12	72.06	0	GBB1_MOUSE	272.907	287.923	203.14	250.324	288.635	284.138	278.155	284.685	213.99	258.25	306.825	305.06	269.503	328.358
Ppp2r1a	Serine/threonine-protein phosphatase 2A 65 kDa regulatory subunit A alpha isoform OS=Mus musculus GN=Ppp2r1a PE=1 SV=3	4.81	66121.1	409.578	Q76MZ3	8	21.22	0.0039	2AAA_MOUSE	301.867	149.443	174.398	449.034	222.381	209.934	312.129	237.936	161.345	556.865	114.251	251.11	261.724	318.881
Hspa5	78 kDa glucose-regulated protein OS=Mus musculus GN=Hspa5 PE=1 SV=3	4.87	72536.2	1150.96	P20029	15	29.31	0	GRP78_MOUSE	255.129	263.92	227.313	247.374	260.171	261.921	273.793	250.317	231.548	247.763	296.207	261.375	256.403	312.397
Vdac1	Voltage-dependent anion-selective channel protein 1 OS=Mus musculus GN=Vdac1 PE=1 SV=3	8.67	32522.6	2073.31	Q60932	11	55.07	0	VDAC1_MOUSE	281.702	269.372	170.648	231.915	288.052	270.098	277.252	281.45	171.752	240.448	289.197	289.689	255.131	310.848
Stxbp1	Syntaxin-binding protein 1 OS=Mus musculus GN=Stxbp1 PE=1 SV=2	6.51	67968	664.702	O08599	15	37.21	0.0039	STXB1_MOUSE	290.48	251.244	158.176	208.472	313.431	287.48	224.642	231.321	203.902	215.449	336.529	302.196	251.943	306.964
Ehd1	EH domain-containing protein 1 OS=Mus musculus GN=Ehd1 PE=1 SV=1	6.36	60659.9	523.497	Q9WVK4	12	40.45	0.0039	EHD1_MOUSE	255.489	214.426	216.305	185.812	291.958	265.221	238.509	248.589	221.464	275.237	317.199	282.947	251.096	305.932
Ap2b1	AP-2 complex subunit beta OS=Mus musculus GN=Ap2b1 PE=1 SV=1	5.05	105495	377.594	Q9DBG3	4	5.76	0.0039	AP2B1_MOUSE	289.812	227.098	138.759	197.806	235.486	267.445	234.937	274.533	384.978	185.869	278.121	264.118	248.247	302.46
Hsp90b1	Endoplasmin OS=Mus musculus GN=Hsp90b1 PE=1 SV=2	4.55	92761.1	415.195	P08113	8	14.34	0.0039	ENPL_MOUSE	290.304	260.671	160.881	199.173	268.702	253.148	290.382	279.183	177.132	220.114	292.735	274.344	247.231	301.222
Cadm3	Cell adhesion molecule 3 OS=Mus musculus GN=Cadm3 PE=1 SV=1	5.4	43363.6	829.579	Q99N28	11	42.93	0	CADM3_MOUSE	270.277	246.575	167.338	246.101	289.982	247.052	266.261	254.457	192.34	246.278	254.725	252.426	244.484	297.876
Fscn1	Fascin OS=Mus musculus GN=Fscn1 PE=1 SV=4	6.45	55249.4	487.479	Q61553	9	23.53	0.0039	FSCN1_MOUSE	173.418	176.742	274.647	306.672	269.119	211.389	205.234	184.727	259.06	271.526	278.461	307.555	243.213	296.326
Actr1a	Alpha-centractin OS=Mus musculus GN=Actr1a PE=2 SV=1	6.18	42727.9	507.681	P61164	7	26.33	0.0039	ACTZ_MOUSE	285.562	260.827	200.478	249.808	221.8	193.262	257.776	268.552	223.884	265.28	246.026	201.253	239.542	291.855
Mapt	Microtubule-associated protein tau OS=Mus musculus GN=Mapt PE=1 SV=3	6.32	76585.7	591.436	P10637	10	30.56	0.0039	TAU_MOUSE	252.474	238.802	183.565	259.628	266.08	181.14	266.799	260.664	211.342	249.315	246.721	251.884	239.034	291.236
Dusp15	Dual specificity protein phosphatase 15 OS=Mus musculus GN=Dusp15 PE=2 SV=3	9.57	26642.5	1886.62	Q8R4V2	11	52.77	0	DUS15_MOUSE	172.011	231.417	225.323	281.335	232.327	249.17	240.314	226.909	225.516	227.789	286.441	255.723	237.856	289.8
Anxa1	Annexin A1 OS=Mus musculus GN=Anxa1 PE=1 SV=2	7.17	39019.5	2430.28	P10107	16	56.94	0	ANXA1_MOUSE	221.204	233.805	208.707	275.191	235.649	226.58	250.783	205.268	225.966	282.132	249.425	236.099	237.567	289.448
Mpp6	MAGUK p55 subfamily member 6 OS=Mus musculus GN=Mpp6 PE=1 SV=1	5.96	62916	583.426	Q9JLB0	10	22.6	0.0039	MPP6_MOUSE	241.703	221.422	147.585	268.901	267.429	195.193	275.786	227.234	225.715	273.509	214.224	290.16	237.405	289.251
Slc25a31	ADP/ATP translocase 4 OS=Mus musculus GN=Slc25a31 PE=2 SV=1	9.89	35543.1	2613.24	Q3V132	9	26.25	0	ADT4_MOUSE	258.053	207.194	218.779	258.795	217.955	202.561	259.669	252.222	241.222	255.945	245.377	220.396	236.514	288.165
Csrp1	Cysteine and glycine-rich protein 1 OS=Mus musculus GN=Csrp1 PE=1 SV=3	8.55	21438.8	1489.92	P97315	8	60.62	0	CSRP1_MOUSE	237.903	222.592	203.642	253.412	234.887	235.564	237.682	225.27	209.395	264.885	250.394	254.643	235.856	287.363
Plg	Plasminogen OS=Mus musculus GN=Plg PE=1 SV=3	6.17	93545.3	430.183	P20918	7	13.67	0.0039	PLMN_MOUSE	261.805	234.173	194.172	291.155	199.635	221.222	250.985	221.905	210.082	280.159	234.289	229.998	235.799	287.293
Mtco2	Cytochrome c oxidase subunit 2 OS=Mus musculus GN=Mtco2 PE=1 SV=1	4.41	26147.6	2012.56	P00405	7	48.02	0	COX2_MOUSE	200.906	224.079	197.29	246.154	276.147	269.91	187.968	231.424	200.468	263.327	288.027	239.321	235.418	286.83
Sdha	Succinate dehydrogenase [ubiquinone] flavoprotein subunit, mitochondrial OS=Mus musculus GN=Sdha PE=1 SV=1	7.03	73669	406.446	Q8K2B3	5	14.91	0.0039	SDHA_MOUSE	238.88	213.276	188.7	242.143	261.065	230.121	241.639	180.801	185.949	254.804	273.782	251.482	230.22	280.497
Dpysl5	Dihydropyrimidinase-related protein 5 OS=Mus musculus GN=Dpysl5 PE=1 SV=1	6.65	62086.8	682.257	Q9EQF6	7	26.77	0.0039	DPYL5_MOUSE	203.526	230.134	192.865	234.316	247.712	228.476	192.968	237.195	211.478	255.755	253.665	253.046	228.428	278.313
Lum	Lumican OS=Mus musculus GN=Lum PE=1 SV=2	5.98	38664.2	1255.96	P51885	6	24.85	0	LUM_MOUSE	363.371	424.998	103.656	129.531	170.531	149.507	319.393	450.373	114.275	123.308	160.472	181.622	224.253	273.227
Ywhag	14-3-3 protein gamma OS=Mus musculus GN=Ywhag PE=1 SV=2	4.61	28473.7	4260.88	P61982	11	51.82	0	1433G_MOUSE	347.978	288.526	111.894	143.196	220.176	211.525	320.522	306.405	122.75	167.004	222.254	222.779	223.751	272.614
Serpinf1	Pigment epithelium-derived factor OS=Mus musculus GN=Serpinf1 PE=1 SV=2	6.52	46291.2	1214.03	P97298	9	33.57	0	PEDF_MOUSE	191.391	223.529	230.325	266.026	245.555	250.496	148.016	185.017	221.296	211.686	214.844	291.489	223.306	272.072
Prdx2	Peroxiredoxin-2 OS=Mus musculus GN=Prdx2 PE=1 SV=3	5.04	21949.8	7100.81	Q61171	12	68.69	0	PRDX2_MOUSE	247.715	210.577	188.6	209.665	236.858	213.519	249.592	219.777	190.338	234.857	239.747	235.732	223.081	271.799
Cav1	Caveolin-1 OS=Mus musculus GN=Cav1 PE=1 SV=1	5.59	20709.8	3900.19	P49817	9	63.48	0	CAV1_MOUSE	268.648	260.95	136.939	184.124	230.713	233.294	275.423	263.79	141.836	183.311	248.278	241.436	222.395	270.963
Actr3	Actin-related protein 3 OS=Mus musculus GN=Actr3 PE=1 SV=3	5.51	47813.4	753.826	Q99JY9	8	31.82	0.0039	ARP3_MOUSE	213.652	225.249	167.505	212.657	239.585	222.354	223.564	220.116	197.259	232.461	232.914	249.672	219.749	267.739
Prdx5	Peroxiredoxin-5, mitochondrial OS=Mus musculus GN=Prdx5 PE=1 SV=2	9.13	22239.7	4856.8	P99029	9	52.38	0	PRDX5_MOUSE	224.682	207.317	210.205	251.367	200.022	198.545	226.7	216.845	221.025	246.088	203.963	193.813	216.714	264.041
Cyb5r3	NADH-cytochrome b5 reductase 3 OS=Mus musculus GN=Cyb5r3 PE=1 SV=3	8.52	34355.8	2201.55	Q9DCN2	11	55.15	0	NB5R3_MOUSE	235.091	220.895	154.091	198.595	223.419	233.774	236.283	227.711	171.825	197.453	246.141	231.46	214.728	261.622
Pdia3	Protein disulfide-isomerase A3 OS=Mus musculus GN=Pdia3 PE=1 SV=2	5.81	57134.7	565.255	P27773	16	40.99	0.0039	PDIA3_MOUSE	192.012	164.567	195.573	235.298	229.651	213.135	205.166	172.236	190.012	226.307	250.84	219.324	207.843	253.233
Mme	Neprilysin OS=Mus musculus GN=Mme PE=1 SV=3	5.46	86386.4	343.175	Q61391	3	7.33	0.0039	NEP_MOUSE	203.345	183.243	160.26	201.026	251.869	234.999	201.772	195.629	168.725	223.594	246.443	219.029	207.494	252.808
Fermt2	Fermitin family homolog 2 OS=Mus musculus GN=Fermt2 PE=1 SV=1	6.25	78484.9	839.897	Q8CIB5	11	33.24	0	FERM2_MOUSE	184.358	175.833	139.984	187.769	272.82	229.538	193.828	184.825	155.537	216.146	284.445	229.546	204.552	249.223
Ldha	L-lactate dehydrogenase A chain OS=Mus musculus GN=Ldha PE=1 SV=3	7.67	36840.8	2249.84	P06151	12	45.78	0	LDHA_MOUSE	172.698	175.458	178.38	199.724	253.524	245.318	168.935	172.787	173.307	191.787	246.391	260.465	203.231	247.614
Des	Desmin OS=Mus musculus GN=Des PE=1 SV=3	5.03	53554.9	1873.52	P31001	5	8.74	0	DESM_MOUSE	226.851	216.543	156.272	207.643	193.915	188.55	219.485	213.281	169.018	208.814	210.45	199.325	200.846	244.707
Phgdh	D-3-phosphoglycerate dehydrogenase OS=Mus musculus GN=Phgdh PE=1 SV=3	6.1	57384	529.984	Q61753	10	25.7	0.0039	SERA_MOUSE	298.553	246.321	125.264	151.521	189.546	171.692	296.534	258.688	123.329	152.097	203.177	188.824	200.462	244.24
Vdac2	Voltage-dependent anion-selective channel protein 2 OS=Mus musculus GN=Vdac2 PE=1 SV=2	7.37	32360.2	2197.14	Q60930	9	48.81	0	VDAC2_MOUSE	225.931	214.585	144.248	176.718	211.175	203.892	217.825	212.786	149.049	181.421	230.228	234.034	200.158	243.869
Hspa1l	Heat shock 70 kDa protein 1-like OS=Mus musculus GN=Hspa1l PE=2 SV=4	5.83	71036.6	1801.03	P16627	9	18.1	0	HS71L_MOUSE	162.988	159.077	322.941	223.043	169.948	146.689	166.592	164.705	319.346	230.283	172.063	160.219	199.825	243.463
Hsp90aa1	Heat shock protein HSP 90-alpha OS=Mus musculus GN=Hsp90aa1 PE=1 SV=4	4.74	85187.2	1142.95	P07901	14	22.78	0	HS90A_MOUSE	280.401	304.766	84.5192	99.4353	191.869	214.886	282.156	321.346	90.7925	121.261	199.4	201.314	199.345	242.879
Gnb2	Guanine nucleotide-binding protein G(I)/G(S)/G(T) subunit beta-2 OS=Mus musculus GN=Gnb2 PE=1 SV=3	5.54	38072.5	2046.79	P62880	10	47.35	0	GBB2_MOUSE	218.241	208.241	138.681	178.29	218.416	213.658	227.983	206.895	143.538	179.785	232.519	209.88	198.011	241.253
Capg	Macrophage-capping protein OS=Mus musculus GN=Capg PE=1 SV=2	6.81	39525.6	781.05	P24452	7	33.24	0.0039	CAPG_MOUSE	211.124	213.073	221.998	227.471	142.125	166.729	199.595	208.083	182.178	202.126	182.784	165.14	193.535	235.801
Hadhb	Trifunctional enzyme subunit beta, mitochondrial OS=Mus musculus GN=Hadhb PE=1 SV=1	9.73	51671.6	402.865	Q99JY0	10	29.47	0.0039	ECHB_MOUSE	153.177	234.165	183.487	195.009	180.275	195.734	161.085	218.97	200.109	198.148	200.655	182.724	191.962	233.883
Ahcy	Adenosylhomocysteinase OS=Mus musculus GN=Ahcy PE=1 SV=3	6.07	48201.5	631.896	P50247	7	23.61	0.0039	SAHH_MOUSE	224.541	212.558	183.327	230.443	149.125	160.665	194.256	213.448	175.402	239.782	155.091	151.526	190.847	232.525
Sept7	Septin-7 OS=Mus musculus GN=Sept7 PE=1 SV=1	8.77	50892.1	864.035	O55131	13	41.97	0	SEPT7_MOUSE	211.303	182.981	139.794	174.028	207.38	197.779	209.135	192.321	150.805	189.189	226.749	204.423	190.491	232.091
Gjc3	Gap junction gamma-3 protein OS=Mus musculus GN=Gjc3 PE=2 SV=2	8.37	30805.9	819.762	Q921C1	6	27.14	0.0039	CXG3_MOUSE	196.244	185.647	140.031	174.933	209.654	218.457	206.049	198.117	122.509	175.238	225.485	227.325	189.974	231.461
Calr	Calreticulin OS=Mus musculus GN=Calr PE=1 SV=1	4.14	48165.7	438.003	P14211	6	29.09	0.0039	CALR_MOUSE	183.728	168.239	159.84	191.242	204.905	190.009	187.145	164.63	167.063	193.416	202.62	191.67	183.709	223.828
Nme1	Nucleoside diphosphate kinase A OS=Mus musculus GN=Nme1 PE=1 SV=1	7.26	17321.9	7079.69	P15532	11	75	0	NDKA_MOUSE	178.661	183.035	174.831	191.381	177.005	172.579	188.923	203.888	173.95	186.373	171.639	168.832	180.925	220.436
Apoa4	Apolipoprotein A-IV OS=Mus musculus GN=Apoa4 PE=1 SV=3	5.18	45029.1	378.315	P06728	7	22.28	0.0039	APOA4_MOUSE	192.269	206.607	105.351	143.362	197.745	215.798	193.704	210.89	98.3404	128.482	230.154	237.897	180.05	219.37
Prelp	Prolargin OS=Mus musculus GN=Prelp PE=1 SV=2	9.84	43634.7	455.443	Q9JK53	9	25.93	0.0039	PRELP_MOUSE	170.719	152.317	143.664	187.305	212.842	189.137	147.512	145.563	154.917	196.109	233.226	199.223	177.711	216.52
Rdx	Radixin OS=Mus musculus GN=Rdx PE=1 SV=3	5.83	68657	733.927	P26043	13	26.76	0.0039	RADI_MOUSE	175.299	155.71	135.875	170.375	188.45	174.581	180.659	176.045	142.264	202.5	204.136	193.84	174.978	213.19
Acat1	Acetyl-CoA acetyltransferase, mitochondrial OS=Mus musculus GN=Acat1 PE=1 SV=1	8.65	45158.4	529.073	Q8QZT1	6	29.25	0.0039	THIL_MOUSE	138.963	132.158	155.75	217.331	198.849	184.987	141.108	145.485	167.167	225.661	191.351	197.855	174.722	212.879
Hspa2	Heat shock-related 70 kDa protein 2 OS=Mus musculus GN=Hspa2 PE=1 SV=2	5.34	69926.9	2758.23	P17156	13	25.43	0	HSP72_MOUSE	187.697	173.443	135.542	162.324	184.555	174.223	197.005	171.556	143.264	170.976	196.624	192.155	174.114	212.137
Cdc42	Cell division control protein 42 homolog OS=Mus musculus GN=Cdc42 PE=1 SV=2	6.15	21600.8	2900.13	P60766	9	48.17	0	CDC42_MOUSE	106.836	107.69	124.512	180.58	231.864	161.26	191.514	126.594	133.637	217.99	273.356	225.482	173.443	211.32
Aspn	Asporin OS=Mus musculus GN=Aspn PE=1 SV=1	8.71	42971.8	503.539	Q99MQ4	6	23.32	0.0039	ASPN_MOUSE	159.615	153.886	208.613	167.843	172.252	154.353	164.329	153.589	210.53	175.445	190.911	167.525	173.241	211.074
Ppib	Peptidyl-prolyl cis-trans isomerase B OS=Mus musculus GN=Ppib PE=1 SV=2	10	23713.5	2013.03	P24369	12	57.41	0	PPIB_MOUSE	176.633	147.501	128.498	174.294	204.511	174.545	180.785	166.298	133.148	184.339	205.443	202.651	173.22	211.049
Entpd2	Ectonucleoside triphosphate diphosphohydrolase 2 OS=Mus musculus GN=Entpd2 PE=1 SV=2	8.33	54946.8	492.972	O55026	8	23.43	0.0039	ENTP2_MOUSE	211.204	186.467	116.879	149.847	192.621	176.979	205.356	194.668	119.296	137.661	198.426	187.609	173.085	210.884
Bsg	Basigin OS=Mus musculus GN=Bsg PE=1 SV=2	5.46	42901	509.005	P18572	5	16.71	0.0039	BASI_MOUSE	198.319	170.373	120.139	145.024	186.647	179.687	198.204	186.191	123.345	157.695	197.571	189.538	171.061	208.418
Gapdhs	Glyceraldehyde-3-phosphate dehydrogenase, testis-specific OS=Mus musculus GN=Gapdhs PE=2 SV=1	7.8	48398.4	2910.49	Q64467	3	10.23	0	G3PT_MOUSE	149.236	139.064	128.52	134.219	352.347	185.035	141.868	137.82	129.065	151.811	201.214	197.935	170.678	207.951
Pfn1	Profilin-1 OS=Mus musculus GN=Pfn1 PE=1 SV=2	8.48	15128.3	6390.48	P62962	9	70.71	0	PROF1_MOUSE	215.397	162.198	155.973	199.609	153.416	146.486	164.135	165.35	151.062	198.78	165.859	160.109	169.864	206.96
Dlat	Dihydrolipoyllysine-residue acetyltransferase component of pyruvate dehydrogenase complex, mitochondrial OS=Mus musculus GN=Dlat PE=1 SV=2	8.67	68512.1	392.875	Q8BMF4	5	13.24	0.0039	ODP2_MOUSE	197.017	180.11	129.752	173.222	165.671	161.54	204.173	167.951	142.472	160.472	163.052	170.228	167.971	204.654
Sept11	Septin-11 OS=Mus musculus GN=Sept11 PE=1 SV=4	6.23	50036.9	369.384	Q8C1B7	3	9.51	0.0039	SEP11_MOUSE	186.114	159.153	121.69	183.622	162.99	179.785	176.882	154.205	155.118	156.94	201.648	172.958	167.592	204.191
Ckmt1	Creatine kinase U-type, mitochondrial OS=Mus musculus GN=Ckmt1 PE=1 SV=1	8.16	47403	565.822	P30275	8	37.56	0.0039	KCRU_MOUSE	169.824	186.014	137.63	172.193	164.154	151.95	187.132	187.04	142.625	172.849	172.278	155.006	166.558	202.932
Cnn3	Calponin-3 OS=Mus musculus GN=Cnn3 PE=1 SV=1	5.34	36599.9	630.147	Q9DAW9	7	27.88	0.0039	CNN3_MOUSE	131.225	144.563	112.513	160.334	178.08	186.221	194.444	172.063	144.376	171.669	210.452	187.501	166.12	202.398
Pgam2	Phosphoglycerate mutase 2 OS=Mus musculus GN=Pgam2 PE=2 SV=3	8.77	28998.2	1203.95	O70250	10	43.87	0	PGAM2_MOUSE	121.49	106.122	139.837	173.557	212.786	202.533	126.485	111.269	146.399	182.902	223.082	211.853	163.193	198.832
Ddah1	N(G),N(G)-dimethylarginine dimethylaminohydrolase 1 OS=Mus musculus GN=Ddah1 PE=1 SV=3	5.56	31780.2	1074.72	Q9CWS0	14	52.63	0	DDAH1_MOUSE	168.177	146.882	144.675	173.039	162.929	151.1	173.118	154.072	149.718	184.904	181.826	154.842	162.107	197.508
Crip2	Cysteine-rich protein 2 OS=Mus musculus GN=Crip2 PE=1 SV=1	8.62	23525.4	10272.4	Q9DCT8	7	63.94	0	CRIP2_MOUSE	142.137	156.49	153.288	190.175	159.356	169.801	140.438	126.145	156.762	209.849	186.487	151.652	161.882	197.234
Atp1b3	Sodium/potassium-transporting ATPase subunit beta-3 OS=Mus musculus GN=Atp1b3 PE=1 SV=1	8.63	32117.9	1458.64	P97370	5	34.53	0	AT1B3_MOUSE	195.962	155.291	112.13	119.378	197.83	168.886	198.988	159.278	92.6894	162.748	193.406	167.736	160.36	195.38
Gnb2l1	Guanine nucleotide-binding protein subunit beta-2-like 1 OS=Mus musculus GN=Gnb2l1 PE=1 SV=3	7.56	35533	1062.2	P68040	11	58.99	0	GBLP_MOUSE	168.926	157.306	110.242	151.519	159.791	226.498	145.155	175.057	139.565	158.244	165.387	157.87	159.63	194.49
Vat1	Synaptic vesicle membrane protein VAT-1 homolog OS=Mus musculus GN=Vat1 PE=1 SV=3	5.92	43324.8	1113.07	Q62465	11	48.52	0	VAT1_MOUSE	154.939	170.041	104.57	146.574	180.397	164.929	154.538	181.126	114.831	145.094	192.049	178.509	157.3	191.651
Slc25a5	ADP/ATP translocase 2 OS=Mus musculus GN=Slc25a5 PE=1 SV=3	10.03	33159.5	4351.08	P51881	11	41.28	0	ADT2_MOUSE	175.455	170.358	112.664	135.461	166.304	171.295	181.033	183.059	113.723	137.901	162.9	175.544	157.141	191.459
Hist1h4a	Histone H4 OS=Mus musculus GN=Hist1h4a PE=1 SV=2	11.77	11367.4	4261.24	P62806	6	57.28	0	H4_MOUSE	148.363	160.414	121.909	133.016	177.388	164.502	148.889	155.949	132.472	164.557	187.334	181.124	156.326	190.466
Crmp1	Dihydropyrimidinase-related protein 1 OS=Mus musculus GN=Crmp1 PE=1 SV=1	6.78	62510	3494.22	P97427	14	50.17	0	DPYL1_MOUSE	134.903	141.975	119.612	148.267	194.012	196.07	125.42	147.723	139.405	149.308	185.487	191.482	156.139	190.237
Ndufs1	NADH-ubiquinone oxidoreductase 75 kDa subunit, mitochondrial OS=Mus musculus GN=Ndufs1 PE=1 SV=2	5.37	80803.5	303.634	Q91VD9	3	6.6	0.0039	NDUS1_MOUSE	186.795	135.999	110.431	164.861	176.37	140.199	177.793	141.792	123.239	183.294	166.394	155.402	155.214	189.11
Slc25a12	Calcium-binding mitochondrial carrier protein Aralar1 OS=Mus musculus GN=Slc25a12 PE=1 SV=1	8.29	74968.9	573.686	Q8BH59	10	27.92	0.0039	CMC1_MOUSE	165.579	159.9	113.045	121.986	161.071	176.047	136.767	172.638	141.14	149.703	177.363	182.849	154.841	188.655
Rufy3	Protein RUFY3 OS=Mus musculus GN=Rufy3 PE=1 SV=1	5.2	53292.3	383.486	Q9D394	6	19.62	0.0039	RUFY3_MOUSE	148.077	125.318	130.552	166.421	170.486	167.613	137.985	126.681	124.583	171.508	185.958	173.615	152.4	185.681
Acat2	Acetyl-CoA acetyltransferase, cytosolic OS=Mus musculus GN=Acat2 PE=1 SV=2	7.24	41754.1	907.667	Q8CAY6	7	32.24	0	THIC_MOUSE	136.933	114.133	145.873	189.557	154.925	139.811	135.698	123.054	152.649	213.728	163.78	152.914	151.921	185.099
Apoh	Beta-2-glycoprotein 1 OS=Mus musculus GN=Apoh PE=1 SV=1	8.12	39930.5	653.809	Q01339	3	13.62	0.0039	APOH_MOUSE	156.91	141.846	128.153	150.331	153.916	144.198	162.104	138.894	124.537	158.699	167.722	151.638	148.246	180.62
Cox4i1	Cytochrome c oxidase subunit 4 isoform 1, mitochondrial OS=Mus musculus GN=Cox4i1 PE=1 SV=2	9.59	19587.5	1112.9	P19783	7	40.83	0	COX41_MOUSE	154.505	129.116	112.68	151.076	172.058	146.769	152.415	130.037	118.553	154.791	180.747	161.06	146.984	179.083
Rhoa	Transforming protein RhoA OS=Mus musculus GN=Rhoa PE=1 SV=1	5.73	22124.4	4297.38	Q9QUI0	7	49.22	0	RHOA_MOUSE	139.388	139.313	118.834	140.553	170.979	167.267	142.689	130.673	113.173	141.917	182.926	170.337	146.504	178.498
Glud1	Glutamate dehydrogenase 1, mitochondrial OS=Mus musculus GN=Glud1 PE=1 SV=1	7.98	61679.1	357.327	P26443	8	19	0.0039	DHE3_MOUSE	184.803	177.02	104.978	179.581	131.252	121.22	190.089	169.98	112.336	133.067	123.666	127.817	146.317	178.271
Mapk3	Mitogen-activated protein kinase 3 OS=Mus musculus GN=Mapk3 PE=1 SV=5	6.14	43408.7	1586.47	Q63844	9	29.21	0	MK03_MOUSE	139.769	134.082	124.762	144.207	156.239	134.749	144.849	145.818	132.683	159.378	163.675	153.487	144.475	176.026
Ywhaq	14-3-3 protein theta OS=Mus musculus GN=Ywhaq PE=1 SV=1	4.49	28063.5	4427.73	P68254	13	63.27	0	1433T_MOUSE	234.95	200.179	73.4489	92.1018	130.969	123.416	224.704	207.235	77.1812	99.6696	134.993	134.493	144.445	175.989
Pdhb	Pyruvate dehydrogenase E1 component subunit beta, mitochondrial OS=Mus musculus GN=Pdhb PE=1 SV=1	6.44	39279.4	656.92	Q9D051	6	23.12	0.0039	ODPB_MOUSE	167.524	147.283	114.646	144.016	139.43	134.724	170.944	157.843	105.298	142.389	162.834	133.264	143.35	174.655
Ogn	Mimecan OS=Mus musculus GN=Ogn PE=2 SV=1	5.4	34354.3	897.18	Q62000	6	20.81	0	MIME_MOUSE	221.965	222.606	89.0218	109.659	110.731	94.9344	215.949	230.405	85.7659	112.942	116.193	110.007	143.348	174.653
Stxbp6	Syntaxin-binding protein 6 OS=Mus musculus GN=Stxbp6 PE=2 SV=1	9.57	23956.2	659.599	Q8R3T5	5	27.14	0.0039	STXB6_MOUSE	142.253	134.513	120.505	165.749	146.942	134.99	143.027	127.552	115.356	161.99	156.873	142.437	141.016	171.811
Aldoc	Fructose-bisphosphate aldolase C OS=Mus musculus GN=Aldoc PE=1 SV=4	6.74	39794.1	2885.16	P05063	7	27.82	0	ALDOC_MOUSE	143.694	142.565	105.642	151.951	146.835	138.523	145.15	131.136	110.36	160.425	152.687	134.337	138.609	168.879
Gnb4	Guanine nucleotide-binding protein subunit beta-4 OS=Mus musculus GN=Gnb4 PE=2 SV=4	5.7	38120.4	1313.19	P29387	7	37.65	0	GBB4_MOUSE	95.9232	238.893	113.418	95.3233	136.682	178.355	96.0793	247.16	101.275	83.3126	105.641	155.818	137.323	167.313
Gnai2	Guanine nucleotide-binding protein G(i) subunit alpha-2 OS=Mus musculus GN=Gnai2 PE=1 SV=5	5.12	41059.3	1322.76	P08752	13	49.58	0	GNAI2_MOUSE	155.495	150.502	101.26	127.956	149.924	137.987	152.228	149.71	95.0515	129.468	136.902	142.19	135.723	165.362
Stk39	STE20/SPS1-related proline-alanine-rich protein kinase OS=Mus musculus GN=Stk39 PE=1 SV=1	5.87	60833.2	424.751	Q9Z1W9	2	7.19	0.0039	STK39_MOUSE	107.38	113.264	97.7859	125.964	173.714	177.394	95.6121	126.653	116.232	118.695	171.735	183.919	134.029	163.299
Ywhab	14-3-3 protein beta/alpha OS=Mus musculus GN=Ywhab PE=1 SV=3	4.57	28200.5	3473.65	Q9CQV8	10	49.59	0	1433B_MOUSE	225.729	202.593	63.1325	72.0482	117.889	103.913	240.443	192.789	67.721	76.1601	112.75	126.867	133.503	162.658
Ndufv1	NADH dehydrogenase [ubiquinone] flavoprotein 1, mitochondrial OS=Mus musculus GN=Ndufv1 PE=1 SV=1	8.15	51518.6	529.58	Q91YT0	5	22.41	0.0039	NDUV1_MOUSE	136.674	123.239	105.467	133.545	143.875	127.093	133.617	128.915	109.249	140.752	139.854	133.196	129.623	157.931
Tagln	Transgelin OS=Mus musculus GN=Tagln PE=1 SV=3	9.22	22632.9	2122.72	P37804	12	65.67	0	TAGL_MOUSE	106.108	115.256	164.436	202.506	80.837	97.2804	108.631	116.932	168.833	207.354	89.2493	96.7162	129.512	157.795
Hspd1	60 kDa heat shock protein, mitochondrial OS=Mus musculus GN=Hspd1 PE=1 SV=1	5.8	61126.7	301.608	P63038	3	9.42	0.0039	CH60_MOUSE	126.472	119.804	94.2418	130.07	143.818	138.236	125.38	126.769	98.6054	132.938	158.385	152.326	128.92	157.075
Rab7a	Ras-related protein Rab-7a OS=Mus musculus GN=Rab7a PE=1 SV=2	6.57	23774.9	1885.3	P51150	12	67.15	0	RAB7A_MOUSE	131.118	122.206	89.4389	121.808	146.686	139.097	135.676	125.042	94.0578	122.453	157.395	148.563	127.795	155.704
Gnaq	Guanine nucleotide-binding protein G(q) subunit alpha OS=Mus musculus GN=Gnaq PE=1 SV=4	5.34	42443.3	855.243	P21279	10	35.93	0	GNAQ_MOUSE	140.901	129.29	105.405	117.091	127.514	139.039	114.493	139.443	119.439	115.321	139.552	142.092	127.465	155.301
Ldhc	L-lactate dehydrogenase C chain OS=Mus musculus GN=Ldhc PE=1 SV=2	8.26	36254.1	982.409	P00342	3	11.75	0	LDHC_MOUSE	116.363	95.3504	119.768	142.025	130.442	129.032	121.856	110.442	128.016	158.356	133.892	134.785	126.694	154.362
Cct2	T-complex protein 1 subunit beta OS=Mus musculus GN=Cct2 PE=1 SV=4	5.95	57819.5	445.988	P80314	6	17.94	0.0039	TCPB_MOUSE	104.403	111.796	107.367	138.428	143.353	137.026	101.956	109.463	110.152	135.553	151.943	149.766	125.101	152.42
Dlst	Dihydrolipoyllysine-residue succinyltransferase component of 2-oxoglutarate dehydrogenase complex, mitochondrial OS=Mus musculus GN=Dlst PE=1 SV=1	9.26	49336.8	548.518	Q9D2G2	4	12.11	0.0039	ODO2_MOUSE	139.821	126.953	93.7068	120.314	130.891	126.481	149.213	122.361	82.1543	134.255	143.008	130.849	125.001	152.299
Atp6v1a	V-type proton ATPase catalytic subunit A OS=Mus musculus GN=Atp6v1a PE=1 SV=2	5.26	68668.4	359.641	P50516	5	14.42	0.0039	VATA_MOUSE	144.112	112.228	83.7167	124.161	134.643	123.011	147.404	123.908	104.623	124.551	136.713	131.179	124.187	151.308
Mapk1	Mitogen-activated protein kinase 1 OS=Mus musculus GN=Mapk1 PE=1 SV=3	6.53	41674.9	1425.04	P63085	7	29.61	0	MK01_MOUSE	115.504	106.568	105.671	120.775	135.021	131.685	117.987	114.062	106.193	127.943	141.011	132.831	121.271	147.755
Rpl4	60S ribosomal protein L4 OS=Mus musculus GN=Rpl4 PE=1 SV=3	11.44	47438.9	448.245	Q9D8E6	5	18.38	0.0039	RL4_MOUSE	129.661	110.269	80.4119	104.363	145.519	141.11	122.915	117.762	80.1376	100.781	153.501	139.391	118.818	144.767
Wdr1	WD repeat-containing protein 1 OS=Mus musculus GN=Wdr1 PE=1 SV=3	6.11	67091.1	405.159	O88342	6	20.3	0.0039	WDR1_MOUSE	80.5853	77.8101	84.6384	113.039	169.057	163.114	74.2797	75.0922	92.063	115.052	179.659	168.594	116.082	141.432
Rap1b	Ras-related protein Rap-1b OS=Mus musculus GN=Rap1b PE=2 SV=2	5.46	21052.9	4505.68	Q99JI6	9	59.78	0	RAP1B_MOUSE	118.35	117.544	92.5431	114.511	117.158	127.638	120.38	117.523	95.1702	119.742	118.54	113.623	114.394	139.375
Cyc1	Cytochrome c1, heme protein, mitochondrial OS=Mus musculus GN=Cyc1 PE=1 SV=1	9.37	35555.8	668.117	Q9D0M3	5	32.92	0.0039	CY1_MOUSE	110.675	120.247	100.063	96.0998	120.606	120.326	98.0815	117.785	103.728	116.112	127.253	119.982	112.58	137.166
Eno2	Gamma-enolase OS=Mus musculus GN=Eno2 PE=1 SV=2	4.8	47638.9	6220.79	P17183	7	28.11	0	ENOG_MOUSE	90.8338	96.9008	103.996	128.185	120.646	122.213	85.8257	85.9476	101.354	139.518	130.628	128.006	111.171	135.449
Cycs	Cytochrome c, somatic OS=Mus musculus GN=Cycs PE=1 SV=2	10	11719.5	4509.96	P62897	6	45.71	0	CYC_MOUSE	112.618	105.12	104.311	125.854	110.937	105.318	106.928	105.705	109.652	128.965	113.206	103.498	111.009	135.252
Rplp0	60S acidic ribosomal protein P0 OS=Mus musculus GN=Rplp0 PE=1 SV=3	5.85	34387.6	544.954	P14869	3	20.5	0.0039	RLA0_MOUSE	117.375	99.1642	69.7651	86.3896	122.208	145.626	154.101	109.404	72.144	88.6861	133.859	119.597	109.86	133.852
Acadvl	Very long-chain specific acyl-CoA dehydrogenase, mitochondrial OS=Mus musculus GN=Acadvl PE=1 SV=3	8.97	71274.8	330.348	P50544	4	12.04	0.0039	ACADV_MOUSE		67.8449	104.234	133.915	134.007	115.364	63.9856	74.5913	101.146	141.932	121.858	140.087	108.997	132.8
Hspa1a	Heat shock 70 kDa protein 1A OS=Mus musculus GN=Hspa1a PE=1 SV=2	5.38	70364.4	1407.4	Q61696	9	21.06	0	HS71A_MOUSE	111.056	121.184	79.8198	97.6472	100.587	115.526	104.824	124.228	87.209	105.814	104.765	125.624	106.524	129.787
Cmtm5	CKLF-like MARVEL transmembrane domain-containing protein 5 OS=Mus musculus GN=Cmtm5 PE=1 SV=1	4.55	17617.5	2798.32	Q9D6G9	2	12.82	0	CKLF5_MOUSE	97.463	89.0269	92.6984	122.418	118.481	104.435	103.877	86.5134	94.5289	124.336	117.617	113.252	105.387	128.402
Hadh	Hydroxyacyl-coenzyme A dehydrogenase, mitochondrial OS=Mus musculus GN=Hadh PE=1 SV=2	9	34635	1137.13	Q61425	5	31.21	0	HCDH_MOUSE	86.5159	89.3925	99.0296	118.456	119.291	111.231	82.9459	90.4915	96.9131	129.076	127.182	108.922	104.954	127.874
Gstp1	Glutathione S-transferase P 1 OS=Mus musculus GN=Gstp1 PE=1 SV=2	7.96	23780.3	1374.44	P19157	8	53.33	0	GSTP1_MOUSE	118.07	110.597	85.4037	104.509	97.3264	89.6121	119.973	113.44	106.234	108.283	104.563	97.9336	104.662	127.519
Ldhb	L-lactate dehydrogenase B chain OS=Mus musculus GN=Ldhb PE=1 SV=2	5.63	36857.5	1464.73	P16125	9	35.33	0	LDHB_MOUSE	119.645	105.981	87.7895	107.842	98.9905	89.4702	124.881	117.587	88.9818	112.415	106.132	93.939	104.471	127.286
Rab5c	Ras-related protein Rab-5C OS=Mus musculus GN=Rab5c PE=1 SV=2	8.58	23640.7	1507.31	P35278	9	58.8	0	RAB5C_MOUSE	96.5949	89.2719	82.4012	108.744	126.493	118.454	89.924	88.347	83.8454	116.706	127.987	118.378	103.929	126.625
Arf4	ADP-ribosylation factor 4 OS=Mus musculus GN=Arf4 PE=1 SV=2	7.04	20510.7	2349.91	P61750	5	37.22	0	ARF4_MOUSE	105.792	151.813	71.6305	90.4341	94.9568	114.434	107.259	151.538	71.4453	83.344	96.2406	102.819	103.476	126.073
Vdac3	Voltage-dependent anion-selective channel protein 3 OS=Mus musculus GN=Vdac3 PE=1 SV=1	9	31094.9	1315.3	Q60931	3	12.01	0	VDAC3_MOUSE	115.796	103.387	75.4725	87.4287	109.398	106.809	121.145	103.117	79.9787	102.404	121.249	113.137	103.277	125.831
Uchl1	Ubiquitin carboxyl-terminal hydrolase isozyme L1 OS=Mus musculus GN=Uchl1 PE=1 SV=1	4.97	25180.5	759.012	Q9R0P9	5	31.39	0.0039	UCHL1_MOUSE	125.185	123.342	65.879	72.7879	107.833	102.407	131.798	133.783	67.0542	79.6993	119.849	107.404	103.085	125.597
Thy1	Thy-1 membrane glycoprotein OS=Mus musculus GN=Thy1 PE=1 SV=1	9.27	18308.1	1085.09	P01831	3	24.07	0	THY1_MOUSE	136.921	104.001	69.2982	106.106	93.7915	86.6812	135.502	132.674	73.1606	105.614	99.7772	91.6134	102.928	125.406
Tufm	Elongation factor Tu, mitochondrial OS=Mus musculus GN=Tufm PE=1 SV=1	7.32	49907.6	383.617	Q8BFR5	4	15.93	0.0039	EFTU_MOUSE	111.232	89.2521	79.3426	103.241	108.978	100.711	125.091	93.3423	92.5065	110.076	111.223	108.05	102.754	125.194
Cct5	T-complex protein 1 subunit epsilon OS=Mus musculus GN=Cct5 PE=1 SV=1	5.63	60080.5	352.425	P80316	3	13.86	0.0039	TCPE_MOUSE	106.258	79.2719	108.756	93.9133	115.847	114.342	117.259	75.7305	119.734	73.4819	98.9178	113.063	101.381	123.521
Jam3	Junctional adhesion molecule C OS=Mus musculus GN=Jam3 PE=1 SV=2	6.64	35407.9	562.218	Q9D8B7	4	20	0.0039	JAM3_MOUSE	69.891	100.974	89.3088	119.009	114.669	97.5019	89.0826	92.0057	96.0556	116.119	116.506	108.653	100.815	122.831
Dynll1	Dynein light chain 1, cytoplasmic OS=Mus musculus GN=Dynll1 PE=1 SV=1	7.23	10537	5086.09	P63168	2	37.08	0	DYL1_MOUSE	103.502	102.362	77.508	95.6835	104.602	103.988	103.459	106.066	79.8287	101.123	114.392	108.53	100.087	121.944
Gnao1	Guanine nucleotide-binding protein G(o) subunit alpha OS=Mus musculus GN=Gnao1 PE=1 SV=3	5.19	40654.9	934.817	P18872	8	32.49	0	GNAO_MOUSE	120.396	105.979	70.1301	88.1722	104.121	94.2689	116.553	105.987	70.6913	93.9626	114.566	99.8482	98.723	120.283
Park7	Protein deglycase DJ-1 OS=Mus musculus GN=Park7 PE=1 SV=1	6.36	20249.5	1551.53	Q99LX0	9	56.61	0	PARK7_MOUSE	109.098	93.1232	93.1068	105.306	93.9587	78.9185	110.931	95.7173	92.7631	116.66	101.485	87.4698	98.2115	119.659
Cfl2	Cofilin-2 OS=Mus musculus GN=Cfl2 PE=1 SV=1	8.16	18823.7	1993.23	P45591	6	45.18	0	COF2_MOUSE	109.449	99.0876	100.666	110.21	78.4117	68.4905	109.397	103.047	110.681	121.4	86.2064	72.0802	97.4271	118.704
Etfa	Electron transfer flavoprotein subunit alpha, mitochondrial OS=Mus musculus GN=Etfa PE=1 SV=2	8.49	35351.6	771.844	Q99LC5	7	29.73	0.0039	ETFA_MOUSE	77.274	65.225	101.039	126.668	102.747	95.4747	84.1745	67.9173	101.91	140.249	111.895	94.0046	97.3814	118.648
Pafah1b1	Platelet-activating factor acetylhydrolase IB subunit alpha OS=Mus musculus GN=Pafah1b1 PE=1 SV=2	7.01	47240.4	433.165	P63005	5	21.71	0.0039	LIS1_MOUSE	110.932	101.574	64.592	99.8244	104.064	96.3265	102.015	100.166	79.7631	89.2857	112.888	103.222	97.0545	118.25
Mgll	Monoglyceride lipase OS=Mus musculus GN=Mgll PE=1 SV=1	6.72	33729.7	739.484	O35678	5	27.39	0.0039	MGLL_MOUSE	93.9708	89.2592	77.0496	117.798	114.06	88.2737	90.0633	94.3984	84.8349	113.34	104.557	96.326	96.9942	118.176
	Ig kappa chain C region OS=Mus musculus PE=1 SV=1	5.07	11949	4408.7	P01837	4	63.21	0	IGKC_MOUSE	40.7242	111.176	157.054	94.1217	87.9339	140.918	41.262	97.8156	135.414	73.1269	68.9679	112.062	96.7147	117.836
Hsd17b10	3-hydroxyacyl-CoA dehydrogenase type-2 OS=Mus musculus GN=Hsd17b10 PE=1 SV=4	8.78	27532.7	1114.68	O08756	4	28.35	0	HCD2_MOUSE	108.085	78.6094	81.2304	101.536	97.2423	74.8749	129.341	75.5254	99.3682	114.887	105.837	91.9377	96.5395	117.622
Gatm	Glycine amidinotransferase, mitochondrial OS=Mus musculus GN=Gatm PE=1 SV=1	7.8	48810.6	569.837	Q9D964	3	13.48	0.0039	GATM_MOUSE	87.7567	75.5364	78.7946	98.9691	115.509	97.4913	117.386	77.7787	85.4414	113.864	109.759	93.1391	95.952	116.906
Tecr	Very-long-chain enoyl-CoA reductase OS=Mus musculus GN=Tecr PE=1 SV=1	9.78	36489.7	327.033	Q9CY27	2	6.49	0.0039	TECR_MOUSE	135.119	99.6626	59.5022	79.87	102.584	85.4462	105.604	102.65	68.9097	95.5488	114.469	94.657	95.3352	116.155
Gstm2	Glutathione S-transferase Mu 2 OS=Mus musculus GN=Gstm2 PE=1 SV=2	7.44	25887.9	1652.27	P15626	10	49.08	0	GSTM2_MOUSE	97.6524	87.1271	98.966	131.616	65.3817	63.8331	99.4071	94.0682	107.701	143.178	77.1993	65.1887	94.2766	114.865
Fh	Fumarate hydratase, mitochondrial OS=Mus musculus GN=Fh PE=1 SV=3	9.38	54585	309.04	P97807	2	5.52	0.0039	FUMH_MOUSE	97.0016	55.1727	79.5712	103.593	91.1475	70.352	83.9493	66.9004	112.231	161.04	113.916	84.7417	93.3013	113.677
Fhl1	Four and a half LIM domains protein 1 OS=Mus musculus GN=Fhl1 PE=1 SV=3	8.26	33827.7	402.493	P97447	3	19.29	0.0039	FHL1_MOUSE	90.9775	88.8886	83.5887	91.9606	96.9477	92.7365	93.6765	92.0693	89.7072	86.4606	98.4721	97.1505	91.8863	111.953
Anxa5	Annexin A5 OS=Mus musculus GN=Anxa5 PE=1 SV=1	4.62	35809.5	335.022	P48036	4	13.17	0.0039	ANXA5_MOUSE	108.671	94.672	81.2059	93.003	88.622	78.5694	104.48	95.4834	84.2428	94.4183	87.7104	88.3456	91.6187	111.627
Rpsa	40S ribosomal protein SA OS=Mus musculus GN=Rpsa PE=1 SV=4	4.6	32952.2	420.695	P14206	4	18.98	0.0039	RSSA_MOUSE	99.7728	86.8446	54.2676	77.0636	112.985	96.6155	106.202	87.3597	70.3654	87.8865	100.941	114.345	91.2207	111.142
Aldh1a1	Retinal dehydrogenase 1 OS=Mus musculus GN=Aldh1a1 PE=1 SV=5	7.7	55095.2	321.876	P24549	3	8.98	0.0039	AL1A1_MOUSE	90.5697	81.4706	96.0746	120.968	76.9958	71.6257	95.8487	81.3518	94.8631	124.68	75.0927	58.6673	89.0173	108.457
Rab5a	Ras-related protein Rab-5A OS=Mus musculus GN=Rab5a PE=1 SV=1	8.25	23826.8	922.83	Q9CQD1	9	59.07	0	RAB5A_MOUSE	83.5022	74.9353	67.9381	91.2014	105.733	93.0041	82.8491	82.0021	74.1775	96.4374	114.609	101.183	88.9643	108.393
Atp5h	ATP synthase subunit d, mitochondrial OS=Mus musculus GN=Atp5h PE=1 SV=3	5.37	18806.5	2390.21	Q9DCX2	7	57.76	0	ATP5H_MOUSE	89.0718	99.0136	72.6645	81.7916	87.7372	94.79	85.1019	100.243	82.3631	86.2569	88.1135	91.3443	88.2076	107.471
Phb	Prohibitin OS=Mus musculus GN=Phb PE=1 SV=1	5.43	29877.1	1125.11	P67778	8	38.97	0	PHB_MOUSE	104.806	91.7493	77.4973	89.0735	87.7015	90.048	78.1281	94.0282	70.3861	69.1477	100.316	98.9909	87.6561	106.799
Ywhah	14-3-3 protein eta OS=Mus musculus GN=Ywhah PE=1 SV=2	4.61	28382.9	3250.34	P68510	12	61.38	0	1433F_MOUSE	119.668	122.511	59.4956	56.8694	82.2526	82.3573	111.869	135.643	62.1372	55.6454	79.6226	79.0123	87.2569	106.312
Rab1A	Ras-related protein Rab-1A OS=Mus musculus GN=Rab1A PE=1 SV=3	5.85	22905.9	1593.72	P62821	8	54.15	0	RAB1A_MOUSE	97.2533	71.0042	57.8668	88.1771	98.485	85.8938	109.002	83.3907	64.9301	88.5513	106.467	93.0329	87.0045	106.005
Nsdhl	Sterol-4-alpha-carboxylate 3-dehydrogenase, decarboxylating OS=Mus musculus GN=Nsdhl PE=2 SV=1	7.78	40971.1	442.464	Q9R1J0	6	24.31	0.0039	NSDHL_MOUSE	105.019	86.2842	59.2632	68.0329	94.796	84.1609	96.276	97.0101	51.6295	82.8736	108.514	91.6866	85.4621	104.126
Gnai1	Guanine nucleotide-binding protein G(i) subunit alpha-1 OS=Mus musculus GN=Gnai1 PE=2 SV=1	5.59	40931.4	1391.41	B2RSH2	12	44.92	0	GNAI1_MOUSE	95.4798	86.0286	60.308	74.1014	94.161	89.9483	100.868	86.7683	62.6748	79.0157	100.592	89.9696	84.993	103.554
Cyb5a	Cytochrome b5 OS=Mus musculus GN=Cyb5a PE=1 SV=2	4.76	15241	1712.25	P56395	4	41.04	0	CYB5_MOUSE	94.4458	91.6389	57.1386	76.7533	87.3291	81.6515	100.188	93.9646	65.0552	74.8907	95.4713	91.1726	84.1416	102.517
Rps27a	Ubiquitin-40S ribosomal protein S27a OS=Mus musculus GN=Rps27a PE=1 SV=2	10.03	18293.1	2266.8	P62983	3	28.21	0	RS27A_MOUSE	95.7745	75.5203	66.1595	74.5263	92.5558	84.3661	94.1284	83.8185	69.9739	75.5357	94.6918	88.9684	83.0016	101.128
Hnrnpk	Heterogeneous nuclear ribonucleoprotein K OS=Mus musculus GN=Hnrnpk PE=1 SV=1	5.22	51261.5	581.693	P61979	4	18.14	0.0039	HNRPK_MOUSE	82.6175	88.3942	51.3837	72.6253	92.6237	84.9728	84.6426	87.8766	54.4884	92.624	84.8503	91.6599	80.7299	98.36
Ola1	Obg-like ATPase 1 OS=Mus musculus GN=Ola1 PE=1 SV=1	7.83	44957.7	743.797	Q9CZ30	3	14.39	0.0039	OLA1_MOUSE	60.1421	63.1224	58.6731	81.9439	94.5768	97.2022	55.5224	65.5749	87.7045	92.966	104.741	99.6183	80.149	97.6523
Tubal3	Tubulin alpha chain-like 3 OS=Mus musculus GN=Tubal3 PE=2 SV=2	5.24	50729.6	940.646	Q3UX10	3	7.4	0	TBAL3_MOUSE	104.47	101.639	44.873	55.9075	85.0306	81.4617	106.011	103.701	49.8564	57.0421	87.0119	84.3019	80.1089	97.6035
Gpd1	Glycerol-3-phosphate dehydrogenase [NAD(+)], cytoplasmic OS=Mus musculus GN=Gpd1 PE=1 SV=3	6.8	38200.1	967.665	P13707	7	36.39	0	GPDA_MOUSE	45.7822	70.7908	90.0758	77.1768	88.309	96.8424	47.9913	84.3006	90.9527	97.274	80.234	88.8833	79.8844	97.3299
Pcyox1	Prenylcysteine oxidase OS=Mus musculus GN=Pcyox1 PE=1 SV=1	6.46	56722.9	325.116	Q9CQF9	2	8.12	0.0039	PCYOX_MOUSE	78.4992	77.6639	54.2519	84.2612	74.6867	72.0095	79.7488	85.6572	76.902	101.82	80.9681	72.3307	78.2333	95.3182
Etfb	Electron transfer flavoprotein subunit beta OS=Mus musculus GN=Etfb PE=1 SV=3	8.25	27851.4	821.299	Q9DCW4	5	29.02	0.0039	ETFB_MOUSE	61.4842	53.1166	91.8157	117.087	73.5641	76.9972	53.6856	41.8304	93.7043	120.295	74.9893	70.3322	77.4085	94.3132
Rps3	40S ribosomal protein S3 OS=Mus musculus GN=Rps3 PE=1 SV=1	10.04	26845.4	872.288	P62908	6	31.28	0	RS3_MOUSE	87.8075	74.0213	47.2229	60.4122	97.2017	89.6836	87.2947	77.8119	47.2554	63.0694	98.6134	95.0189	77.1177	93.959
Prnp	Major prion protein OS=Mus musculus GN=Prnp PE=1 SV=2	9.55	28148.6	434.511	P04925	3	12.2	0.0039	PRIO_MOUSE	70.5318	65.6012	64.9403	77.5149	76.6643	81.3661	90.5591	65.4348	71.3474	82.0731	82.2468	74.0598	75.195	91.6163
Ezr	Ezrin OS=Mus musculus GN=Ezr PE=1 SV=3	5.73	69521	565.075	P26040	9	16.21	0.0039	EZRI_MOUSE	82.025	70.657	56.9648	72.5591	80.9993	73.3959	82.8054	74.2875	59.8328	78.5106	89.6894	78.7918	75.0432	91.4315
Dctn2	Dynactin subunit 2 OS=Mus musculus GN=Dctn2 PE=1 SV=3	4.97	44231	515.039	Q99KJ8	3	15.17	0.0039	DCTN2_MOUSE	78.3676	77.2964	48.5829	75.269	74.897	80.3312	103.591	74.7884	34.5169	75.5316	81.8739	80.1812	73.7689	89.8789
Rps4x	40S ribosomal protein S4, X isoform OS=Mus musculus GN=Rps4x PE=2 SV=2	10.59	29825.9	546.198	P62702	3	16.73	0.0039	RS4X_MOUSE	88.9224	61.0864	46.8735	65.8614	81.9358	67.895	86.0857	64.607	58.8396	78.5706	100.849	78.9426	73.3724	89.3958
Rap1a	Ras-related protein Rap-1A OS=Mus musculus GN=Rap1a PE=2 SV=1	6.53	21329.4	4310.97	P62835	10	59.78	0	RAP1A_MOUSE	73.241	71.3963	57.1739	67.1616	78.5825	80.3052	74.1834	73.9093	59.1213	71.8524	82.5943	76.815	72.1947	87.9609
Rps2	40S ribosomal protein S2 OS=Mus musculus GN=Rps2 PE=2 SV=3	10.65	31516.5	1021.87	P25444	3	13.31	0	RS2_MOUSE	80.2336	67.5436	54.647	57.9704	94.6011	67.5391	80.4132	72.9005	43.9284	67.3343	101.548	73.2418	71.8251	87.5106
Mapre1	Microtubule-associated protein RP/EB family member 1 OS=Mus musculus GN=Mapre1 PE=1 SV=3	4.93	30187.3	485.904	Q61166	3	23.88	0.0039	MARE1_MOUSE	60.9982	47.1555	53.4618	81.6825	87.8487	79.6809	59.9686	66.9741	53.8835	79.9491	90.1591	91.3556	71.0931	86.6187
Ndufa9	NADH dehydrogenase [ubiquinone] 1 alpha subcomplex subunit 9, mitochondrial OS=Mus musculus GN=Ndufa9 PE=1 SV=2	10.06	42639.3	644.016	Q9DC69	2	9.81	0.0039	NDUA9_MOUSE	59.9684	91.9115	50.6395	67.2391	99.9221	72.0846	53.9708	71.778	69.2082	59.0465	82.4297	73.2017	70.95	86.4444
Pcmt1	Protein-L-isoaspartate(D-aspartate) O-methyltransferase OS=Mus musculus GN=Pcmt1 PE=1 SV=3	7.59	24691.5	742.718	P23506	4	37	0.0039	PIMT_MOUSE	65.5782	70.9193	56.7576	76.7895	78.7368	66.006	61.4581	74.4079	64.578	80.848	82.0979	72.9802	70.9298	86.4197
Rab2a	Ras-related protein Rab-2A OS=Mus musculus GN=Rab2a PE=1 SV=1	6.08	23718.6	709.409	P53994	4	26.89	0.0039	RAB2A_MOUSE	78.2124	75.1928	48.6615	71.6769	75.5023	73.4264	84.0695	74.9221	40.434	72.857	75.252	70.4284	70.0529	85.3514
Rpl18	60S ribosomal protein L18 OS=Mus musculus GN=Rpl18 PE=2 SV=3	12.19	21701.6	317.333	P35980	2	13.83	0.0039	RL18_MOUSE	79.4406	68.0974	45.7476	58.3594	82.2135	75.3291	78.3482	69.7277	47.4724	62.1936	86.8215	80.0594	69.4842	84.6584
Tagln2	Transgelin-2 OS=Mus musculus GN=Tagln2 PE=1 SV=4	8.44	22566.6	1129.98	Q9WVA4	10	57.29	0	TAGL2_MOUSE	83.5907	69.2688	58.7202	72.0672	67.1437	62.2658	83.6844	69.6695	60.1199	73.5784	69.2625	62.1318	69.2919	84.4241
Calm1	Calmodulin OS=Mus musculus GN=Calm1 PE=1 SV=2	3.88	16837.7	683.063	P62204	5	36.24	0.0039	CALM_MOUSE	61.0472	96.9393	48.1971	66.0825	63.9447	61.6174	62.3082	97.8575	51.5791	69.6024	67.3006	69.562	68.0032	82.854
Tubb6	Tubulin beta-6 chain OS=Mus musculus GN=Tubb6 PE=1 SV=1	4.59	50546.7	9210.84	Q922F4	18	53.69	0	TBB6_MOUSE	77.3027	87.6997	38.7108	48.7841	72.3074	69.9305	79.5473	68.5336	40.941	57.2882	76.6648	71.2366	65.7456	80.1034
Ube2n	Ubiquitin-conjugating enzyme E2 N OS=Mus musculus GN=Ube2n PE=1 SV=1	6.15	17194.9	1574.87	P61089	3	25	0	UBE2N_MOUSE	65.7143	70.1806	46.6221	73.9583	73.5708	54.8184	68.9004	74.9835	62.1394	64.0469	61.2717	58.8638	64.5892	78.6944
Myl12b	Myosin regulatory light chain 12B OS=Mus musculus GN=Myl12b PE=1 SV=2	4.49	19836.2	585.699	Q3THE2	7	55.81	0.0039	ML12B_MOUSE	69.2161	65.7418	48.2226	70.1735	60.1446	63.5485	67.3068	66.389	56.5959	73.1254	63.3291	64.008	63.9834	77.9564
Rab14	Ras-related protein Rab-14 OS=Mus musculus GN=Rab14 PE=1 SV=3	5.8	24125.1	1426.11	Q91V41	7	48.84	0	RAB14_MOUSE	73.2931	68.0922	40.7341	52.0752	70.4999	61.4555	73.782	71.3629	46.9554	57.2167	71.94	72.7353	63.3452	77.1788
Dstn	Destrin OS=Mus musculus GN=Dstn PE=1 SV=3	7.99	18863.8	840.745	Q9R0P5	5	42.42	0	DEST_MOUSE	56.3768	68.5585	57.5338	73.3836	52.9385	58.9852	59.3071	73.618	61.4273	78.086	56.3715	50.5766	62.2636	75.8609
Rps8	40S ribosomal protein S8 OS=Mus musculus GN=Rps8 PE=1 SV=2	10.72	24490.3	573.801	P62242	5	31.73	0.0039	RS8_MOUSE	56.7919	74.2331	35.5073	57.9152	82.8427	70.1268	80.7166	52.6829	33.781	40.6049	83.8704	71.2023	61.6896	75.1616
Tpi1	Triosephosphate isomerase OS=Mus musculus GN=Tpi1 PE=1 SV=4	5.43	32705.1	554.99	P17751	2	9.03	0.0039	TPIS_MOUSE	52.2225	63.4745	79.7865	76.4386	52.1924	47.4302	51.7589	46.5803	82.9537	80.9498	55.1664	50.5454	61.6249	75.0828
Ina	Alpha-internexin OS=Mus musculus GN=Ina PE=1 SV=3	5.18	55553.7	1069.67	P46660	8	12.97	0	AINX_MOUSE	67.444	59.5012	41.1808	50.3113	71.1898	62.2427	73.1856	67.716	40.2162	61.3003	74.3091	66.8083	61.2838	74.6672
Rab5b	Ras-related protein Rab-5B OS=Mus musculus GN=Rab5b PE=1 SV=1	8.24	23935	1057.16	P61021	7	46.98	0	RAB5B_MOUSE	63.7475	56.3185	43.3882	60.0627	65.352	61.1557	67.2669	59.7264	46.1317	60.2398	71.9751	65.6937	60.0882	73.2105
Cd59a	CD59A glycoprotein OS=Mus musculus GN=Cd59a PE=2 SV=1	7.34	14332.4	619.62	O55186	2	21.14	0.0039	CD59A_MOUSE	61.7202	55.8114	54.898	63.1012	62.8363	64.3597	59.4995	54.2239	54.2614	63.6518	60.0236	61.8848	59.6893	72.7245
Marcks	Myristoylated alanine-rich C-kinase substrate OS=Mus musculus GN=Marcks PE=1 SV=2	4.12	29718.4	1016.38	P26645	7	75.73	0	MARCS_MOUSE	52.838	61.2233	53.302	58.0527	65.5723	52.0313	59.49	63.5211	52.866	59.1674	68.7963	54.341	58.4334	71.1944
Eif4a1	Eukaryotic initiation factor 4A-I OS=Mus musculus GN=Eif4a1 PE=1 SV=1	5.15	46382.2	357.363	P60843	6	23.4	0.0039	IF4A1_MOUSE	69.627	62.6554	39.4516	52.5936	64.6867	60.9316	67.8626	61.0816	39.7945	51.1764	67.0025	58.6787	57.9618	70.6198
Arhgdia	Rho GDP-dissociation inhibitor 1 OS=Mus musculus GN=Arhgdia PE=1 SV=3	4.91	23464.5	1187.99	Q99PT1	4	32.84	0	GDIR1_MOUSE	69.5259	84.8623	36.0249	43.695	53.1797	63.5282	68.2402	76.5447	32.4127	46.6793	56.4862	59.6319	57.5676	70.1394
Ube2l3	Ubiquitin-conjugating enzyme E2 L3 OS=Mus musculus GN=Ube2l3 PE=2 SV=1	8.8	18032.7	818.493	P68037	3	42.21	0.0039	UB2L3_MOUSE	56.662	73.5146	48.6728	77.7901	42.5455	38.8189	48.4919	77.1351	49.882	73.4723	46.9106	51.348	57.1036	69.5742
Alad	Delta-aminolevulinic acid dehydratase OS=Mus musculus GN=Alad PE=1 SV=1	6.33	36479.8	447.36	P10518	4	26.36	0.0039	HEM2_MOUSE	50.6875	63.3248	56.2308	51.7882	61.3483	53.7697	50.3053	62.89	46.9767	58.859	60.7735	54.8418	55.983	68.2087
Fkbp1a	Peptidyl-prolyl cis-trans isomerase FKBP1A OS=Mus musculus GN=Fkbp1a PE=1 SV=2	8.66	11979.7	1097.4	P26883	2	25	0	FKB1A_MOUSE	49.1495	83.8211	44.2523	59.374	36.7964	44.9439	47.166	90.2912	49.7491	59.931	38.3835	42.091	53.8291	65.5845
Rab6a	Ras-related protein Rab-6A OS=Mus musculus GN=Rab6a PE=1 SV=4	5.23	23703.9	812.297	P35279	3	17.31	0.0039	RAB6A_MOUSE	61.3235	55.2528	41.2764	43.2275	52.5747	57.2045	76.0211	73.1641	45.04	46.5025	48.3672	40.5477	53.3752	65.0314
Rab1b	Ras-related protein Rab-1B OS=Mus musculus GN=Rab1b PE=1 SV=1	5.39	22358.3	934.452	Q9D1G1	7	52.74	0	RAB1B_MOUSE	56.4414	50.8544	38.5626	44.121	58.0122	54.8522	58.4177	50.6989	37.7967	53.801	59.2882	60.4062	51.9377	63.2801
Tubb1	Tubulin beta-1 chain OS=Mus musculus GN=Tubb1 PE=1 SV=1	4.78	51125.4	2285.45	A2AQ07	6	10.64	0	TBB1_MOUSE	65.9985	53.2779	18.7529	40.2467	63.2792	60.667	63.5737	52.8599	18.5559	40.9584	73.7233	63.5303	51.2853	62.4852
Gng2	Guanine nucleotide-binding protein G(I)/G(S)/G(O) subunit gamma-2 OS=Mus musculus GN=Gng2 PE=2 SV=2	8.25	7964.22	5978.92	P63213	5	69.01	0	GBG2_MOUSE	55.9218	47.2486	39.2348	48.439	58.6999	52.6562	55.621	45.8911	39.8503	48.0265	60.9946	54.9744	50.6299	61.6866
Purb	Transcriptional activator protein Pur-beta OS=Mus musculus GN=Purb PE=1 SV=3	5.14	34015.5	543.784	O35295	2	15.12	0.0039	PURB_MOUSE	58.5028	50.7092	35.7171	52.5445	50.3439	45.7392	61.3883	50.3065	39.3466	57.8753	54.2637	48.4797	50.4347	61.4489
Rps7	40S ribosomal protein S7 OS=Mus musculus GN=Rps7 PE=2 SV=1	10.58	22126.9	835.947	P62082	4	37.63	0	RS7_MOUSE	42.6018	49.8638	38.2699	43.3505	51.5819	53.269	68.7108	47.8403	49.3757	37.1931	47.4797	53.5833	48.5933	59.2053
Arpc4	Actin-related protein 2/3 complex subunit 4 OS=Mus musculus GN=Arpc4 PE=1 SV=3	8.78	19781.1	439.283	P59999	2	11.31	0.0039	ARPC4_MOUSE	53.0431	46.2144	36.3558	53.7637	45.1967	43.332	53.9959	49.157	35.7922	53.0159	47.9776	44.2616	46.8422	57.0717
Hpcal1	Hippocalcin-like protein 1 OS=Mus musculus GN=Hpcal1 PE=2 SV=2	5.16	22452.3	643.38	P62748	6	38.34	0.0039	HPCL1_MOUSE	49.7396	46.9536	38.9812	47.8016	45.1838	41.1236	54.418	49.5719	42.4081	53.2983	47.8746	43.6547	46.7507	56.9604
Rpl12	60S ribosomal protein L12 OS=Mus musculus GN=Rpl12 PE=1 SV=2	9.9	17975.7	1047.14	P35979	5	43.03	0	RL12_MOUSE	51.7775	44.7553	32.1624	40.3899	49.4301	45.5135	50.2615	46.9115	31.6691	39.5086	52.1347	48.3144	44.4024	54.0991
Eif4a2	Eukaryotic initiation factor 4A-II OS=Mus musculus GN=Eif4a2 PE=2 SV=2	5.16	46630.5	372.31	P10630	7	26.29	0.0039	IF4A2_MOUSE	51.336	43.8556	29.4179	45.4253	48.4889	43.2965	50.0351	45.0354	29.3405	37.7323	55.9221	47.4356	43.9434	53.54
Atp5j2	ATP synthase subunit f, mitochondrial OS=Mus musculus GN=Atp5j2 PE=1 SV=3	10.23	10401.3	1214.04	P56135	2	26.14	0	ATPK_MOUSE	44.5271	36.0863	24.6604	44.5106	48.0473	43.9432	53.817	45.4093	27.4871	39.7601	55.9469	46.631	42.5689	51.8652
Ppic	Peptidyl-prolyl cis-trans isomerase C OS=Mus musculus GN=Ppic PE=1 SV=1	7.36	22908.3	642.443	P30412	4	25	0.0039	PPIC_MOUSE	39.9697	38.8319	36.5227	47.4109	50.6285	44.8111	41.3013	39.1703	33.7279	47.3868	44.7998	44.9183	42.4566	51.7285
Gstp2	Glutathione S-transferase P 2 OS=Mus musculus GN=Gstp2 PE=2 SV=2	7.96	23708.2	1303.67	P46425	6	37.62	0	GSTP2_MOUSE	48.5201	37.8931	31.7322	42.9476	39.9958	36.3875	48.7729	44.0661	43.6563	44.4981	42.9696	40.2941	41.8111	50.942
Gna11	Guanine nucleotide-binding protein subunit alpha-11 OS=Mus musculus GN=Gna11 PE=1 SV=1	5.6	42309.4	342.861	P21278	4	15.6	0.0039	GNA11_MOUSE	48.5145	41.5139	28.7099	42.9234	43.5109	37.0006	48.6632	45.2272	34.3757	42.6877	46.2267	41.3576	41.7259	50.8382
Tmed9	Transmembrane emp24 domain-containing protein 9 OS=Mus musculus GN=Tmed9 PE=1 SV=2	8.7	27241.3	555.664	Q99KF1	2	11.91	0.0039	TMED9_MOUSE	45.0055	42.5189	32.4842	39.0722	39.4403	39.6868	47.9838	42.9431	30.1655	37.2232	51.5424	39.076	40.5952	49.4605
Gnai3	Guanine nucleotide-binding protein G(k) subunit alpha OS=Mus musculus GN=Gnai3 PE=1 SV=3	5.36	41108.5	926.152	Q9DC51	7	23.45	0	GNAI3_MOUSE	44.205	40.6059	30.2139	32.7023	47.0284	44.5088	43.6797	44.5114	25.9666	30.8185	47.0575	48.0057	39.942	48.6647
Rps14	40S ribosomal protein S14 OS=Mus musculus GN=Rps14 PE=2 SV=3	10.53	16443.8	532.717	P62264	2	22.52	0.0039	RS14_MOUSE	41.3904	36.9524	32.6042	38.0308	41.172	39.039	43.8746	38.0317	35.3229	44.4514	42.3698	40.5773	39.4847	48.1075
Rpl23	60S ribosomal protein L23 OS=Mus musculus GN=Rpl23 PE=1 SV=1	10.94	14979.5	1139.01	P62830	3	30.71	0	RL23_MOUSE	37.7087	37.2703	31.1897	31.7999	39.8567	35.1108	40.4325	34.9431	32.3157	32.4767	43.0035	40.0068	36.3429	44.2796
Rps13	40S ribosomal protein S13 OS=Mus musculus GN=Rps13 PE=1 SV=2	10.94	17222.3	702.737	P62301	3	24.5	0.0039	RS13_MOUSE	38.4209	33.4574	24.3895	33.6822	40.9234	35.4725	38.1728	34.2671	24.8997	33.2445	41.4077	43.6327	35.1642	42.8435
Cnrip1	CB1 cannabinoid receptor-interacting protein 1 OS=Mus musculus GN=Cnrip1 PE=1 SV=1	8.19	18726.4	677.605	Q5M8N0	3	28.05	0.0039	CNRP1_MOUSE	28.231	32.1964	28.2706	41.244	38.353	37.7922	27.0095	34.0414	30.7905	35.8336	35.7324	39.3261	34.0684	41.5084
Rab35	Ras-related protein Rab-35 OS=Mus musculus GN=Rab35 PE=1 SV=1	8.39	23310.4	1590.45	Q6PHN9	2	14.43	0	RAB35_MOUSE	34.8371	33.4072	37.4363	37.5944	30.6276	31.198	25.5331	34.5955	29.9674	49.618	29.9372	31.1178	33.8225	41.2088
Dynll2	Dynein light chain 2, cytoplasmic OS=Mus musculus GN=Dynll2 PE=1 SV=1	7.24	10463.9	520.887	Q9D0M5	2	37.08	0.0039	DYL2_MOUSE	35.8433	36.9722	28.3255	34.1313	30.8895	29.4459	34.6818	37.3144	28.7282	33.5277	33.1115	30.5	32.7893	39.9499
Cend1	Cell cycle exit and neuronal differentiation protein 1 OS=Mus musculus GN=Cend1 PE=1 SV=1	9.55	15044	901.224	Q9JKC6	3	40.94	0	CEND_MOUSE	33.6808	32.5377	22.3815	28.5481	31.0007	28.7016	33.9534	32.7437	22.4445	28.2345	33.812	30.0958	29.8445	36.3621
Basp1	Brain acid soluble protein 1 OS=Mus musculus GN=Basp1 PE=1 SV=3	4.29	22086.6	410.439	Q91XV3	2	20.35	0.0039	BASP1_MOUSE	31.3318	27.0674	25.7553	34.6639	29.1409	27.9167	33.9442	29.6425	21.1249	30.5134	31.7635	33.8441	29.7257	36.2173
Ddah2	N(G),N(G)-dimethylarginine dimethylaminohydrolase 2 OS=Mus musculus GN=Ddah2 PE=1 SV=1	5.59	29988	325.423	Q99LD8	3	10.53	0.0039	DDAH2_MOUSE	29.3877	26.0577	31.8573	31.7245	25.5098	25.1441	28.3771	27.6726	29.6825	33.4483	26.1613	24.4492	28.2893	34.4673
Rhob	Rho-related GTP-binding protein RhoB OS=Mus musculus GN=Rhob PE=1 SV=1	4.91	22579.6	1563.16	P62746	4	25	0	RHOB_MOUSE	29.2664	26.3215	18.8886	23.8134	28.3728	33.4787	17.1322	25.9924	19.2674	30.9969	29.9424	28.5752	26.004	31.6828
Gypc	Glycophorin-C OS=Mus musculus GN=Gypc PE=3 SV=2	5.05	10386	1091.46	Q78HU7	2	28.42	0	GLPC_MOUSE	23.5658	33.4206	17.7573	24.9343	23.4696	21.0777	19.8944	28.0565	18.676	23.6364	23.4619	24.8732	23.5686	28.7157
Prdx4	Peroxiredoxin-4 OS=Mus musculus GN=Prdx4 PE=1 SV=1	6.76	31280.7	2212.01	O08807	2	8.03	0	PRDX4_MOUSE	25.0547	24.3761	20.5757		26.3533	25.0631	21.7942	22.9452	14.7965	18.856	28.49	26.5063	23.1646	28.2234
Rhog	Rho-related GTP-binding protein RhoG OS=Mus musculus GN=Rhog PE=2 SV=1	8.08	21764.7	1692.62	P84096	3	17.28	0	RHOG_MOUSE	22.8962	20.4613	18.6815	22.2927	26.4179	26.3584	23.2777	21.9638	17.4685	21.2533	23.0792	23.3303	22.2901	27.1579
Cox6b1	Cytochrome c oxidase subunit 6B1 OS=Mus musculus GN=Cox6b1 PE=1 SV=2	8.97	10299.6	732.293	P56391	2	29.07	0.0039	CX6B1_MOUSE	19.1594	34.3478	18.5386	28.6214	14.0869	19.5818	18.5458	33.5335	19.8537	27.9733	15.2211	16.9769	22.2034	27.0522
Gnat2	Guanine nucleotide-binding protein G(t) subunit alpha-2 OS=Mus musculus GN=Gnat2 PE=2 SV=2	5.04	40688.1	763.643	P50149	4	10.17	0.0039	GNAT2_MOUSE	16.7668	15.7937	22.3768	18.8506	24.5173	21.5474	17.2482	24.4046	11.3955	15.501	25.0098	24.1238	19.7946	24.1175
Rab8b	Ras-related protein Rab-8B OS=Mus musculus GN=Rab8b PE=1 SV=1	9.43	23774.2	759.765	P61028	4	21.74	0.0039	RAB8B_MOUSE	17.3294	17.8984	14.6786	22.2377	23.2326	23.2339	17.1966	21.8579	14.632	15.8383	20.7962	25.3095	19.5201	23.7829
Fabp4	Fatty acid-binding protein, adipocyte OS=Mus musculus GN=Fabp4 PE=1 SV=3	8.8	14764	4225.58	P04117	3	24.24	0	FABP4_MOUSE	12.8586	12.3431	11.4458	14.9165	13.7089	16.3788	12.0236	16.3465	13.5992	16.2495	13.5142	23.2047	14.7158	17.9295
Rhoc	Rho-related GTP-binding protein RhoC OS=Mus musculus GN=Rhoc PE=1 SV=2	6.19	22348.6	2664.07	Q62159	6	36.79	0	RHOC_MOUSE	12.5835	12.1822	10.68	13.2445	16.9302	15.2617	12.8833	14.5946	11.1543	13.8415	16.5875	15.819	13.8135	16.8302
Gstm5	Glutathione S-transferase Mu 5 OS=Mus musculus GN=Gstm5 PE=1 SV=1	7	27034.2	576.005	P48774	2	8.93	0.0039	GSTM5_MOUSE	12.2411	14.9879	14.9373	18.5565	11.9678	14.3576	16.3697	10.638	14.6894	14.2523	9.51292	11.8135	13.6937	16.6841
Gng12	Guanine nucleotide-binding protein G(I)/G(S)/G(O) subunit gamma-12 OS=Mus musculus GN=Gng12 PE=1 SV=3	9.48	8111.3	913.799	Q9DAS9	2	34.72	0	GBG12_MOUSE	9.78641	8.99338	7.01844	9.71449	10.4064	10.6011	9.88492	8.64727	7.2119	8.63037	11.1169	11.4407	9.45435	11.519
SPIKE	Enolase 1 OS=Saccharomyces cerevisiae (strain ATCC 204508 / S288c) GN=ENO1 PE=1 SV=3	6.15	46873.2	11411.5	P00924	12	35.47	0	ENO1_YEAST	3600.17	3323.84	2951.69	3682.24	2648.51	2153.2	3610.15	3426.84	3050.4	3843.41	2769.98	2324.76	3115.43
TRYPSIN	Trypsin OS=Sus scrofa PE=1 SV=1	6.91	25093.8	2382.41	P00761	5	31.17	0	TRYP_PIG	6320.58	5722.1	4376.09	5442.5	4782.04	4302.61	7089.47	5411.41	4612.58	5264.35	5128.28	4568.11	5251.68

## Sheet: 3  UDMSe proteome WT myelin
gene name	description	IEP	mw	max score	accession	reported peptides	sequence coverage	FDR level	entry	WT 1	WT 2	WT 3	WT 4	WT 5	WT 6	WT 7	WT 8	WT 9	WT 10	WT 11	WT 12	AVERAGE WT	AVERAGE WT corr
Flna	Filamin-A OS=Mus musculus GN=Flna PE=1 SV=5	5.61	284073	1884.13	Q8BTM8	84	53.49	0	FLNA_MOUSE	53323.9	52153.6	45019.1	52581.6	97760.4	105521	58095.4	56677.6	62262.8	55629.1	104467	88614.2	69342.1	75450.6
Prx	Periaxin OS=Mus musculus GN=Prx PE=2 SV=1	8.36	147916	53043.9	O55103	59	64.92	0	PRAX_MOUSE	61884.7	53491.5	49743.4	57218.7	59266.8	56001.3	69949.3	58252.1	52454.1	60746.1	61753.5	57801.4	58213.6	63341.8
Dmd	Dystrophin OS=Mus musculus GN=Dmd PE=1 SV=3	5.56	427942	259.847	P11531	18	6.96	0.003	DMD_MOUSE	28356.5	28854.4	15921.9	22192.3	24888.5	24900.4	27213.7	28156.7	18866.2	18678.3	24253.1	25616.3	23991.5	26105
Nxn	Nucleoredoxin OS=Mus musculus GN=Nxn PE=1 SV=1	4.66	48743.3	442.274	P97346	2	5.75	0.0024	NXN_MOUSE	13213.4	13521	23268.1	26317.4	12693.5	11928.7	13138.5	19552.3	22914.2	13314.3	11247.5	16554.6	16472	17923
Lama4	Laminin subunit alpha-4 OS=Mus musculus GN=Lama4 PE=1 SV=2	5.77	204500	361.646	P97927	22	18.23	0.0024	LAMA4_MOUSE	1264.5	19380	16068.7	19679.1	19568.8	20084.1	19568.1	17239.2	14617	6608.53	17496.6	18514	15840.7	17236.2
Dync1h1	Cytoplasmic dynein 1 heavy chain 1 OS=Mus musculus GN=Dync1h1 PE=1 SV=2	5.98	534784	2071.03	Q9JHU4	184	52.3	0	DYHC1_MOUSE	15341.1	15551.4	14996.4	18113.7	16020.2	16101.9	15011.9	14022.5	14299.8	18662.2	15148.8	15389.6	15721.6	17106.6
Fasn	Fatty acid synthase OS=Mus musculus GN=Fasn PE=1 SV=2	6.12	275166	3782.76	P19096	107	64.86	0	FAS_MOUSE	13313.1	14108.1	20062.9	16216.7	14445.2	14651	12886.4	13436.5	19802.8	15954.3	12804	14247.1	15160.7	16496.2
Fbn1	Fibrillin-1 OS=Mus musculus GN=Fbn1 PE=1 SV=1	4.6	332854	942.794	Q61554	47	23.02	0.0024	FBN1_MOUSE	10971.2	10503.9	37884.6	15116.4	8314.7	7628.07	11321.8	11139.4	33870.5	15140.5	8408.56	8370.11	14889.1	16200.8
Nefm	Neurofilament medium polypeptide OS=Mus musculus GN=Nefm PE=1 SV=4	4.56	96030.3	16374	P08553	45	55.9	0	NFM_MOUSE	15119.6	15556.3	9243.38	12097.2	12326.2	12443	14881.2	14450.7	9088.49	12842.4	12267.9	12654	12747.5	13870.5
Epb41l2	Band 4.1-like protein 2 OS=Mus musculus GN=Epb41l2 PE=1 SV=2	5.15	110453	10972.8	O70318	59	72.17	0	E41L2_MOUSE	12125	15242.1	13347.5	11994.2	13501.7	11764	12754.2	12102.2	9109.99	14045.7	10390.8	12289.8	12388.9	13480.3
Mpz	Myelin protein P0 OS=Mus musculus GN=Mpz PE=1 SV=1	9.75	27792.9	23759.8	P27573	11	50	0	MYP0_MOUSE	10558.1	9769.09	8321.47	9232.47	16097.4	11527.2	8229.62	8478.86	12526.9	11397.8	19129	17826.8	11924.6	12975
Sptan1	Spectrin alpha chain, non-erythrocytic 1 OS=Mus musculus GN=Sptan1 PE=1 SV=4	5.04	285396	6945.27	P16546	147	68.97	0	SPTN1_MOUSE	13140.2	12218.9	7805.54	8897.26	11822.3	10851.3	14878.3	12168	8331.69	9970.83	13040.1	12174.1	11274.9	12268.1
Hdlbp	Vigilin OS=Mus musculus GN=Hdlbp PE=1 SV=1	6.42	142313	367.338	Q8VDJ3	14	16.17	0.0024	VIGLN_MOUSE	12157.1	11088.2	10253.1	11418.5	10075.6	10233.1	10219.6	11224.2	10716.3	11268.1	10755.1	10217.8	10802.2	11753.8
Sptbn1	Spectrin beta chain, non-erythrocytic 1 OS=Mus musculus GN=Sptbn1 PE=1 SV=2	5.26	275079	7481.24	Q62261	125	65.38	0	SPTB2_MOUSE	9562.22	9078.78	6813.12	8349.44	10289.8	9934.07	9823.73	10348.4	12574.8	12099.9	9111.13	10517.4	9875.22	10745.2
Mbp	Myelin basic protein OS=Mus musculus GN=Mbp PE=1 SV=2	10.05	27167.7	16311.3	P04370	5	16.8	0	MBP_MOUSE	7246.36	10789.2	8368.98	8126.53	9263.47	8012.1	7661.8	9080.02	9092.47	7886.11	10342.5	10408.2	8856.48	9636.68
Lamc1	Laminin subunit gamma-1 OS=Mus musculus GN=Lamc1 PE=1 SV=2	4.9	182944	1288.38	P02468	33	24.77	0.0024	LAMC1_MOUSE	10269.1	10180.9	9225.08	10593.5	1660.6	9958.87	10982.5	9619.69	8099.01	10739.5	9641.61	1617.51	8548.99	9302.1
Tf	Serotransferrin OS=Mus musculus GN=Tf PE=1 SV=1	6.85	78890.9	21420.8	Q921I1	41	72.74	0	TRFE_MOUSE	9727.55	6789.64	8145	9591.56	6866.89	6451.92	9587.01	8202.37	9051.55	11008.8	6652.81	7486.98	8296.84	9027.74
Mpp2	MAGUK p55 subfamily member 2 OS=Mus musculus GN=Mpp2 PE=1 SV=1	6	61840.3	584.457	Q9WV34	2	4.17	0.0024	MPP2_MOUSE	7399.48	7021.44	6705.9	6338.9	7930.15	7935.74	7438.25	6564.71	7448.91	7868.35	10724.2	7887.24	7605.27	8275.24
Eno1	Alpha-enolase OS=Mus musculus GN=Eno1 PE=1 SV=3	6.38	47483.1	64407.7	P17182	24	70.28	0	ENOA_MOUSE	7314.96	6247.47	6494.88	7199.37	8617.22	7875.35	8082.61	6285.05	6979.08	8645.17	9185.98	8251.28	7598.2	8267.55
Plec	Plectin OS=Mus musculus GN=Plec PE=1 SV=3	5.63	536127	1473.76	Q9QXS1	172	46	0.0024	PLEC_MOUSE	7507.8	7064.05	6145.79	4588.05	8751.19	8601.18	8660.52	8402.97	6560.16	7544.88	9398.16	7829.72	7587.87	8256.31
Rab39a	Ras-related protein Rab-39A OS=Mus musculus GN=Rab39a PE=1 SV=1	6.67	25376.8	1212.42	Q8BHD0	2	8.29	0.0024	RB39A_MOUSE	10425.7	4384.17	8080.9	8648.62	6979.98	6538.27	8158.18	9030.91	7145.64	8419.47	6051.03	6348.41	7517.61	8179.86
Tuba8	Tubulin alpha-8 chain OS=Mus musculus GN=Tuba8 PE=1 SV=1	4.8	50735.9	29547.8	Q9JJZ2	12	35.63	0	TBA8_MOUSE	8767.23	8363.4	5217.4	5661.85	7876.24	7121.43	8708.67	8113.74	5034.64	5644.22	7245.03	7672.83	7118.89	7746.02
Nefl	Neurofilament light polypeptide OS=Mus musculus GN=Nefl PE=1 SV=5	4.41	61565.6	34820.5	P08551	34	70.72	0	NFL_MOUSE	8145.37	8007.36	5525.17	6170	6579.49	6539.4	7848.54	7871.03	5209.32	6301.9	6029.95	6292.7	6710.02	7301.13
Atp1a1	Sodium/potassium-transporting ATPase subunit alpha-1 OS=Mus musculus GN=Atp1a1 PE=1 SV=1	5.14	114294	11408.5	Q8VDN2	43	47.12	0	AT1A1_MOUSE	7902.95	7488.83	5479.88	6630.84	6342.44	5813.48	7203.15	7226.14	5297.7	6606.45	5817.1	5852.88	6471.82	7041.94
Dpysl2	Dihydropyrimidinase-related protein 2 OS=Mus musculus GN=Dpysl2 PE=1 SV=2	5.92	62676.9	31870.5	O08553	29	80.07	0	DPYL2_MOUSE	5872.87	5750.45	6410.9	6841.92	6887.68	6719.94	5806.69	5563.3	5927.57	7220.52	6769.59	6619.49	6365.91	6926.7
Tuba4a	Tubulin alpha-4A chain OS=Mus musculus GN=Tuba4a PE=1 SV=1	4.75	50665.8	36087.5	P68368	23	69.64	0	TBA4A_MOUSE	7460.84	6998.65	4171.82	4562.95	6716.29	6806.55	7526.59	6762.64	4040.14	4702.29	6389.63	6493.26	6052.64	6585.83
Eef1a1	Elongation factor 1-alpha 1 OS=Mus musculus GN=Eef1a1 PE=1 SV=3	9.34	50456.1	28597.9	P10126	19	64.29	0	EF1A1_MOUSE	5815.96	5214.66	4749.18	5657.14	6373.55	6127.36	5925.16	5633.62	5251.99	6363.68	6798.26	6397.19	5858.98	6375.11
Cd9	CD9 antigen OS=Mus musculus GN=Cd9 PE=1 SV=2	6.96	25828.3	20177.3	P40240	7	28.76	0	CD9_MOUSE	5695.17	5612.9	5875.05	5867.75	6072.07	5856.83	5154.55	5241.25	4635.66	5829.17	5848.89	5856.19	5628.79	6124.65
Vim	Vimentin OS=Mus musculus GN=Vim PE=1 SV=3	4.86	53744.8	35087	P20152	34	74.25	0	VIME_MOUSE	5303.88	5036.72	4436.49	4820.22	6235.83	6102.62	5209.62	4993.99	4219.98	5100.34	6047.13	6488.02	5332.9	5802.7
Sec23a	Protein transport protein Sec23A OS=Mus musculus GN=Sec23a PE=1 SV=2	6.65	87074.4	729.901	Q01405	18	35.69	0.0024	SC23A_MOUSE	4896.95	4686.99	11315.2	5564.02	2897.14	2645.32	4717.46	4335.82	10603.5	5475.75	2748.41	2492.74	5198.28	5656.21
Tkt	Transketolase OS=Mus musculus GN=Tkt PE=1 SV=1	7.23	68314.9	20814.9	P40142	33	79.61	0	TKT_MOUSE	5327.22	4980.65	4993.27	5614.57	5769.66	5513.39	4251.8	4471.22	4941.94	5159.98	5247.68	6046.33	5193.14	5650.62
Map1b	Microtubule-associated protein 1B OS=Mus musculus GN=Map1b PE=1 SV=2	4.57	271510	1902.37	P14873	66	43.79	0	MAP1B_MOUSE	5169.45	4278.87	7132.79	3940.6	4691.07	4606.17	5885.5	4663.9	7139.55	5292.27	5118.08	4326.14	5187.03	5643.98
Cnp	2',3'-cyclic-nucleotide 3'-phosphodiesterase OS=Mus musculus GN=Cnp PE=1 SV=3	9.26	47522.6	41918.8	P16330	25	65.95	0	CN37_MOUSE	4468.3	6340.23	4892.92	4742.01	6650.28	7346.69	4236.52	4757.08	3698.47	4216.06	5201.85	5161.48	5142.66	5595.69
Anxa2	Annexin A2 OS=Mus musculus GN=Anxa2 PE=1 SV=2	7.69	38961.4	35736	P07356	25	71.98	0	ANXA2_MOUSE	5360.36	6787.42	4469.12	4825.33	4699.66	5220.24	5395.31	5807.12	3809.3	4464.73	4580.03	4964.09	5031.89	5475.17
Cltc	Clathrin heavy chain 1 OS=Mus musculus GN=Cltc PE=1 SV=3	5.35	193325	4858.96	Q68FD5	73	61.01	0	CLH1_MOUSE	4747.48	4986.88	9445.06	3424.69	4062.6	3877.03	5093.08	4259.51	8197.01	3887.79	4132.49	4158.96	5022.71	5465.18
Flnb	Filamin-B OS=Mus musculus GN=Flnb PE=1 SV=3	5.34	280277	3251.29	Q80X90	110	66.26	0	FLNB_MOUSE	5693.12	5458.26	4375.79	4648.41	5091.18	5870.94	5413.94	4589.81	3901.12	4808.13	4990.98	5216.21	5004.82	5445.72
Gapdh	Glyceraldehyde-3-phosphate dehydrogenase OS=Mus musculus GN=Gapdh PE=1 SV=2	8.35	36095.2	29168.8	P16858	15	72.37	0	G3P_MOUSE	4989.61	4667.36	3998.54	3983.69	6226.06	6167.53	5010.53	4698.59	3804.36	4314.42	5525.01	6486.62	4989.36	5428.89
Mag	Myelin-associated glycoprotein OS=Mus musculus GN=Mag PE=1 SV=2	4.85	70115.2	6254.95	P20917	16	39.94	0	MAG_MOUSE	5133.49	5537.28	4038.89	4544.26	5541.52	5747.46	4597.9	5076.79	3578	4448.5	4765.8	5558.97	4880.74	5310.7
Nefh	Neurofilament heavy polypeptide OS=Mus musculus GN=Nefh PE=1 SV=3	5.56	117280	8153.26	P19246	37	37.43	0	NFH_MOUSE	5870.75	5353.8	3756.3	4339.71	4785.61	4423.49	6517.53	5380.32	3886.31	4423.46	4641.93	4749.33	4844.05	5270.77
Actb	Actin, cytoplasmic 1 OS=Mus musculus GN=Actb PE=1 SV=1	5.14	42079	31417.9	P60710	17	60.27	0	ACTB_MOUSE	4965.82	5045.42	3920.47	4098.6	4983.6	4554.92	5396.55	5206.33	4056.43	4555.87	4933.2	4912.71	4719.16	5134.88
Jup	Junction plakoglobin OS=Mus musculus GN=Jup PE=1 SV=3	5.69	82542.3	6390.37	Q02257	28	49.8	0	PLAK_MOUSE	3868.3	4289.11	6225.61	4780.77	4238.29	4242.24	4101.2	4206.96	5668.91	4744.71	3866.04	4303.96	4544.67	4945.03
Hspa8	Heat shock cognate 71 kDa protein OS=Mus musculus GN=Hspa8 PE=1 SV=1	5.2	71099.3	18246.4	P63017	30	61.46	0	HSP7C_MOUSE	5066.14	4911.47	3672.99	3967.6	4597.73	4595.22	4933.17	4616.46	3645.05	4360.83	4317.01	4680.15	4446.98	4838.73
Col1a2	Collagen alpha-2(I) chain OS=Mus musculus GN=Col1a2 PE=2 SV=2	9.5	130070	1191.67	Q01149	18	21.43	0.0024	CO1A2_MOUSE	5161.84	5216.57	3587.77	4417.32	4433.8	4501.46	4827.62	5087.71	3486.56	4114.54	4038.27	4437.62	4442.59	4833.95
Tubb5	Tubulin beta-5 chain OS=Mus musculus GN=Tubb5 PE=1 SV=1	4.59	50127.2	56707.3	P99024	23	69.14	0	TBB5_MOUSE	5360.43	5285.13	3051.38	3368.71	5104.96	5169.27	4849.31	5376.3	2842.18	3226.8	4452.68	5197.65	4440.4	4831.57
Myh9	Myosin-9 OS=Mus musculus GN=Myh9 PE=1 SV=4	5.38	227570	3677.97	Q8VDD5	84	49.74	0	MYH9_MOUSE	4074.79	4170	4446.17	4611.77	4501.94	4468.95	4135.09	3729.7	3705.65	4817.63	4401.04	4315.14	4281.49	4658.66
Atp5b	ATP synthase subunit beta, mitochondrial OS=Mus musculus GN=Atp5b PE=1 SV=2	5.03	56300.6	20341.4	P56480	25	75.24	0	ATPB_MOUSE	4742.81	4505.23	3403.14	3466.26	4283.28	4083.74	4863.74	4252.94	3212.11	3739.97	4557.59	4283.77	4116.21	4478.82
Tln1	Talin-1 OS=Mus musculus GN=Tln1 PE=1 SV=2	5.76	271989	1739.74	P26039	84	54.15	0.0024	TLN1_MOUSE	3631.81	4051.04	4155.58	4756.41	4029.89	3403.73	3228.12	4078.49	3924.53	4928.62	4036.58	4359.86	4048.72	4405.39
Hspg2	Basement membrane-specific heparan sulfate proteoglycan core protein OS=Mus musculus GN=Hspg2 PE=1 SV=1	5.85	408103	1228.68	Q05793	68	30.16	0.0024	PGBM_MOUSE	3434.56	3171.07	3760.37	3918.41	4998.71	5362.01	3084.14	3282.47	3382.61	4159.32	5019.11	4946.56	4043.28	4399.46
Map4	Microtubule-associated protein 4 OS=Mus musculus GN=Map4 PE=1 SV=3	4.7	118000	7008.99	P27546	48	73.51	0	MAP4_MOUSE	4566.79	4540.57	3068.53	3457.62	4210.31	3941.17	4386.21	4290.08	3147.96	3821.83	4167.35	3975.52	3964.5	4313.74
Cab39	Calcium-binding protein 39 OS=Mus musculus GN=Cab39 PE=1 SV=2	6.46	40014.1	685.139	Q06138	12	41.35	0.0024	CAB39_MOUSE	4484.67	4115.65	3944.85	4493.2	3187.12	3148.04	4213.01	4907.14	4037.73	4378.69	3079.33	3055.45	3920.41	4265.77
Actbl2	Beta-actin-like protein 2 OS=Mus musculus GN=Actbl2 PE=1 SV=1	5.15	42346.5	9031.92	Q8BFZ3	8	26.86	0	ACTBL_MOUSE	4298.27	4138.47	3798.99	3989.73	3429.89	3398.22	3931.68	4246.25	3902.38	4186.03	3490.83	3423.65	3852.86	4192.28
Col1a1	Collagen alpha-1(I) chain OS=Mus musculus GN=Col1a1 PE=1 SV=4	5.51	139059	1086.57	P11087	11	12.94	0.0024	CO1A1_MOUSE	4405.42	4881.93	2422.15	2910.12	2974.05	3532.11	4139.14	5055.99	2514.18	3077.44	2952.4	3563.44	3535.7	3847.17
Atp5a1	ATP synthase subunit alpha, mitochondrial OS=Mus musculus GN=Atp5a1 PE=1 SV=1	9.52	59866.8	13334.8	Q03265	27	62.21	0	ATPA_MOUSE	3739.49	3574.19	2986.57	3086.01	3741.43	3931.4	3565.89	3681.46	2926.56	3362.65	3827.53	3955.27	3531.54	3842.64
Ckm	Creatine kinase M-type OS=Mus musculus GN=Ckm PE=2 SV=1	6.62	43273.2	29759.6	P07310	17	68.77	0	KCRM_MOUSE	2319.96	2206.82	2669.61	3116.51	5108.34	4928.5	2143.66	2239.44	2781.01	3262.9	5180.91	4967.94	3410.47	3710.91
Pkm	Pyruvate kinase PKM OS=Mus musculus GN=Pkm PE=1 SV=4	7.21	58415.3	13838.9	P52480	29	73.63	0	KPYM_MOUSE	3816.91	3750.05	2820.55	3151.1	3195.9	3415.98	3846.78	3531.04	2530.36	3203.48	3338.28	3127.1	3310.63	3602.27
Anxa6	Annexin A6 OS=Mus musculus GN=Anxa6 PE=1 SV=3	5.18	76341.7	11056.6	P14824	47	73.25	0	ANXA6_MOUSE	3683.29	3744.07	2608.53	3155.55	3381.85	3219.33	3664.82	3425.91	2605.47	3195.56	3426.6	3309.08	3285	3574.39
Flnc	Filamin-C OS=Mus musculus GN=Flnc PE=1 SV=3	5.54	293743	411.242	Q8VHX6	15	6.53	0.0024	FLNC_MOUSE	2958.51	3756.85	3346.16	4439.69	2448.17	2782.4	2785.76	3524.08	3181.49	4481.87	2486.01	2836.75	3252.31	3538.82
Prph	Peripherin OS=Mus musculus GN=Prph PE=1 SV=2	5.25	54381.7	17871.3	P15331	33	67.79	0	PERI_MOUSE	3638.97	3839.3	2547.65	2855.74	3575.88	3446.07	3493.79	3384.66	2367.45	2971.11	3164.06	3542.8	3235.62	3520.66
C3	Complement C3 OS=Mus musculus GN=C3 PE=1 SV=3	6.27	188024	3491.37	P01027	73	61.33	0	CO3_MOUSE	3374.53	3518.88	3307.7	4331.62	2528.83	2632.28	2865.15	3390.46	3516.95	4154.24	2408.21	2597.58	3218.87	3502.43
Plp1	Myelin proteolipid protein OS=Mus musculus GN=Plp1 PE=1 SV=2	8.29	30875.6	10268.2	P60202	8	28.16	0	MYPR_MOUSE	3357.95	3213.1	2724.47	3128.73	3438.02	3459.56	3240.12	3131.86	2763.29	3411	3337.53	3308.35	3209.5	3492.23
Pygb	Glycogen phosphorylase, brain form OS=Mus musculus GN=Pygb PE=1 SV=3	6.27	97414.4	781.547	Q8CI94	30	46.62	0.0024	PYGB_MOUSE	2423.91	2129.26	8726.48	2495.08	1374.93	1210.89	2302.81	2229.53	9274.12	2606.02	578.11	1210.94	3046.84	3315.25
Aldoa	Fructose-bisphosphate aldolase A OS=Mus musculus GN=Aldoa PE=1 SV=2	8.07	39812.2	22678	P05064	23	82.14	0	ALDOA_MOUSE	2831.69	2735.86	2476.66	2626.21	3399.58	3463.08	2768.48	2827.02	2554.41	2927.07	3366.11	3674.77	2970.91	3232.63
Dsp	Desmoplakin OS=Mus musculus GN=Dsp PE=1 SV=1	6.38	335365	2404.61	E9Q557	48	19.11	0	DESP_MOUSE	483.228	1259.07	14612.7	2274.7	280.958	341.134	470.166	1281.83	11436.4	2029.84	281.55	289.154	2920.06	3177.3
Atp1a3	Sodium/potassium-transporting ATPase subunit alpha-3 OS=Mus musculus GN=Atp1a3 PE=1 SV=1	5.09	113117	10307.4	Q6PIC6	41	51.53	0	AT1A3_MOUSE	3351.11	3378.18	2345.32	2649.82	3032.96	3019.83	3200.16	3139.25	2232.58	2619.48	2918.07	2808.34	2891.26	3145.96
Pmp2	Myelin P2 protein OS=Mus musculus GN=Pmp2 PE=2 SV=2	10	15049.5	38972	P24526	10	65.15	0	MYP2_MOUSE	2975.34	3049.06	2853.63	3324.17	2726.32	2573.68	2861.93	2835	2676.68	3420.38	2640.5	2670.78	2883.96	3138.01
Fn1	Fibronectin OS=Mus musculus GN=Fn1 PE=1 SV=4	5.25	276188	338.486	P11276	22	14.86	0.0024	FINC_MOUSE	2291.54	3276.06	2922.57	4270.72	2793.17	2795.1	2691.23	2396.34	2630.3	2875.5	2792.69	2657.45	2866.06	3118.54
Tubb3	Tubulin beta-3 chain OS=Mus musculus GN=Tubb3 PE=1 SV=1	4.63	50875	33232.1	Q9ERD7	24	74.22	0	TBB3_MOUSE	3662.11	3019.73	1838.18	2077.9	3271.61	3031.81	3499.56	3157.21	1869.42	2246.77	3292.53	3051.77	2834.88	3084.62
Aco2	Aconitate hydratase, mitochondrial OS=Mus musculus GN=Aco2 PE=1 SV=1	7.83	86205	7370.47	Q99KI0	32	62.82	0	ACON_MOUSE	2202.84	2114.66	3342.4	3500.38	2760.02	2582.39	2258.23	2070.67	3298.06	3993.21	2889.42	2828.02	2820.02	3068.45
Gdi2	Rab GDP dissociation inhibitor beta OS=Mus musculus GN=Gdi2 PE=1 SV=1	5.85	51050.5	14349.6	Q61598	32	76.4	0	GDIB_MOUSE	3660.11	2670.16	2581.63	2895	2747.53	2210.35	2635.31	2681.1	2779.89	2842.64	2691.94	2857.21	2771.07	3015.19
Twf2	Twinfilin-2 OS=Mus musculus GN=Twf2 PE=1 SV=1	6.34	39699.1	740.751	Q9Z0P5	2	4.3	0.0024	TWF2_MOUSE	2916.26	2566.53	2853.77	3102.87	2768.28	2355.14	2468.81	2802.64	2779.88	3236.25	2516.1	2720.64	2757.26	3000.16
Ppp2r1a	Serine/threonine-protein phosphatase 2A 65 kDa regulatory subunit A alpha isoform OS=Mus musculus GN=Ppp2r1a PE=1 SV=3	4.81	66121.1	2016.21	Q76MZ3	25	52.12	0	2AAA_MOUSE	2140.05	2562.38	4043.99	5322.38	1417.15	1600.68	1307.9	2776.26	3978.51	4580.05	1870.13	1075.86	2722.94	2962.82
Vcp	Transitional endoplasmic reticulum ATPase OS=Mus musculus GN=Vcp PE=1 SV=4	4.95	90006.3	3346.14	Q01853	32	58.19	0	TERA_MOUSE	3142.83	2687.28	3246.58	4553.53	1034.74	1288.44	3056.87	2647.92	3459.46	4221.16	1218.39	1448.56	2667.15	2902.11
Gsn	Gelsolin OS=Mus musculus GN=Gsn PE=1 SV=3	5.76	86340.9	4287.99	P13020	25	52.44	0	GELS_MOUSE	3197.88	3221.33	2355.39	2715.68	2070.19	1935.98	3388.79	3230.87	2056.42	2627.45	2129.67	2001.1	2577.56	2804.63
Atp2b1	Plasma membrane calcium-transporting ATPase 1 OS=Mus musculus GN=Atp2b1 PE=1 SV=1	5.54	135717	571.545	G5E829	16	19.43	0.0024	AT2B1_MOUSE	1893.41	4083.28	3228.41	4471.07	1466.21	1891.18	592.074	3996.72	2714.4	2850.01	966.761	2354.63	2542.35	2766.31
Cd81	CD81 antigen OS=Mus musculus GN=Cd81 PE=1 SV=2	5.44	26498.9	17993.7	P35762	4	30.93	0	CD81_MOUSE	2536.43	2268.36	2411.56	2626.34	2698.08	2521.28	2380.45	2273.05	2351.31	2738.01	2650.87	2770.24	2518.83	2740.72
Pabpc1	Polyadenylate-binding protein 1 OS=Mus musculus GN=Pabpc1 PE=1 SV=2	9.81	70899.1	653.412	P29341	18	38.52	0.0024	PABP1_MOUSE	1983.08	1722.74	4211.81	3989.24	1087.89	1349.95	2344.13	2083.74	4116.54	3852.13	1467.62	1613.93	2485.23	2704.17
Col6a1	Collagen alpha-1(VI) chain OS=Mus musculus GN=Col6a1 PE=2 SV=1	5.03	109630	5199.01	Q04857	26	36.39	0	CO6A1_MOUSE	2151.52	2016.88	1862.25	2241.53	3407	3177.21	2001.32	1994.71	1758.98	2357.75	3198.8	3448.78	2468.06	2685.48
Ppia	Peptidyl-prolyl cis-trans isomerase A OS=Mus musculus GN=Ppia PE=1 SV=2	8	18142.5	36826.6	P17742	9	64.63	0	PPIA_MOUSE	2648.38	2686.13	2160.23	2558.21	2437.73	2398.35	2358.18	2715.78	2138.86	2711.02	2262.75	2483.69	2463.28	2680.27
Hk1	Hexokinase-1 OS=Mus musculus GN=Hk1 PE=1 SV=3	6.35	109615	1075.06	P17710	31	40.04	0.0024	HXK1_MOUSE	3095.95	2510.79	2783.22	2000.26	2888.79	3024.42	2090.74	1806.04	2524.97	569.526	2739.42	2670.27	2392.03	2602.75
Cap1	Adenylyl cyclase-associated protein 1 OS=Mus musculus GN=Cap1 PE=1 SV=4	7.3	51907.1	13513.4	P40124	22	59.7	0	CAP1_MOUSE	2611.44	2367.87	1963.57	2393.3	2507.74	2571.79	2091.25	2322.06	2268.23	2574.61	2507.09	2273.65	2371.05	2579.92
Rdx	Radixin OS=Mus musculus GN=Rdx PE=1 SV=3	5.83	68657	3767.13	P26043	26	48.89	0	RADI_MOUSE	1550.15	1554.21	1267.79	1381.32	3476.32	3619.76	1578.46	1519.35	3025.18	1428.44	3695.35	3952.01	2337.36	2543.27
Itgb4	Integrin beta-4 OS=Mus musculus GN=Itgb4 PE=2 SV=1	5.49	205472	1273.65	A2A863	56	44.77	0.0024	ITB4_MOUSE	2750.33	2723.36	1536.52	1706.8	2588.81	2557.38	2557.65	2628.13	1595.67	1855.94	2451.05	2492.32	2287	2488.47
P4hb	Protein disulfide-isomerase OS=Mus musculus GN=P4hb PE=1 SV=2	4.58	57457.7	2813.92	P09103	24	56.78	0	PDIA1_MOUSE	2243.53	2448.61	2087.66	2069.04	2415.86	2855.5	1896.07	2110.8	2091.22	2073.35	2186.55	2605.54	2256.98	2455.8
Map1a	Microtubule-associated protein 1A OS=Mus musculus GN=Map1a PE=1 SV=2	4.73	301509	507.525	Q9QYR6	33	18.12	0.0024	MAP1A_MOUSE	2349.76	2003.51	1618.13	2139.61	2297.84	2412.01	2654.93	2433.8	1909.48	2051.4	2554.93	2423.39	2237.4	2434.5
Prdx1	Peroxiredoxin-1 OS=Mus musculus GN=Prdx1 PE=1 SV=1	8.23	22404.6	29227.7	P35700	13	67.34	0	PRDX1_MOUSE	2366.49	2340.63	2078.62	2315.81	2251.53	2311.73	2193.65	2128.28	1986.55	2234.93	2252.36	2244.86	2225.45	2421.5
Lama2	Laminin subunit alpha-2 OS=Mus musculus GN=Lama2 PE=1 SV=2	5.67	353054	494.773	Q60675	49	22.55	0.0024	LAMA2_MOUSE	2368.71	1756.19	2018.95	2401.38	2498.85	2203.03	2230.03	2043.51	1882.41	2516.8	2110.58	2279.42	2192.49	2385.63
Fam129b	Niban-like protein 1 OS=Mus musculus GN=Fam129b PE=2 SV=2	5.56	85446	805.221	Q8R1F1	19	36.72	0.0024	NIBL1_MOUSE	935.95	1924.1	3132.36	3680.18	1416.32	1600.23	2151.04	950.821	2984.84	3623.57	1916.81	1558.01	2156.19	2346.13
Ndrg1	Protein NDRG1 OS=Mus musculus GN=Ndrg1 PE=1 SV=1	5.65	43465	20565.1	Q62433	14	68.78	0	NDRG1_MOUSE	3436.09	3060.73	1137.45	1191.99	1851.01	1808.8	3448.72	2870.62	1045.14	1249.98	1896.97	1930.31	2077.32	2260.31
Col14a1	Collagen alpha-1(XIV) chain OS=Mus musculus GN=Col14a1 PE=2 SV=2	4.8	194211	1927.77	Q80X19	53	43.02	0	COEA1_MOUSE	1967.66	2082.79	1870.64	1862.52	2068.66	2589.76	1763.77	2099.5	1544.81	1827.69	2112.34	2082.51	1989.39	2164.64
Acly	ATP-citrate synthase OS=Mus musculus GN=Acly PE=1 SV=1	7.12	120641	3864.57	Q91V92	45	59.76	0	ACLY_MOUSE	1886.06	2312.51	1834.58	2000.21	1948.29	2214.89	1697.31	2177.68	1783.22	1768.09	1706.25	2433.67	1980.23	2154.68
Atp2b2	Plasma membrane calcium-transporting ATPase 2 OS=Mus musculus GN=Atp2b2 PE=1 SV=2	5.59	133785	400.57	Q9R0K7	11	12.02	0.0024	AT2B2_MOUSE	2278.96	2269.07	1454.6	1757	1881.32	2033.36	2227.9	2480.95	1281.1	1933.38	2008.7	2075.49	1973.49	2147.34
Bcas1	Breast carcinoma-amplified sequence 1 homolog OS=Mus musculus GN=Bcas1 PE=2 SV=3	5.82	67833.8	3888.72	Q80YN3	12	27.33	0	BCAS1_MOUSE	2210.88	2162.44	1727	1914.65	1945.08	1800.92	1999.3	2005.24	1690.13	2075.22	1969.87	1872.35	1947.76	2119.34
Tubb4b	Tubulin beta-4B chain OS=Mus musculus GN=Tubb4b PE=1 SV=1	4.6	50287.4	51205.8	P68372	25	75.28	0	TBB4B_MOUSE	2388.73	2154.01	1213.86	1350.43	2147.48	2163.91	2254.21	2328.54	1126.95	1321.1	2130.26	2127.03	1892.21	2058.9
Myh10	Myosin-10 OS=Mus musculus GN=Myh10 PE=1 SV=2	5.27	229966	981.433	Q61879	48	32.03	0.0024	MYH10_MOUSE	1803.37	1474.47	1932.28	2193.99	1689.24	1677.9	1819.82	1621.07	2079.84	2451.37	1991.95	1773.48	1875.73	2040.97
Pllp	Plasmolipin OS=Mus musculus GN=Pllp PE=2 SV=1	9.57	19915.6	8591.27	Q9DCU2	2	21.43	0	PLLP_MOUSE	1970.37	1862.57	1687.43	1899.76	1764.5	1752.76	1796.13	1876.47	1654.85	2069.44	1767.38	1792.56	1824.52	1985.25
Tubb2b	Tubulin beta-2B chain OS=Mus musculus GN=Tubb2b PE=1 SV=1	4.59	50409.4	44420.6	Q9CWF2	25	71.91	0	TBB2B_MOUSE	2191.71	2050.52	1147.25	1294.16	2158.94	2194.2	2168.8	1944.97	1136.76	1347.41	2088.06	2130.59	1821.11	1981.54
Fermt2	Fermitin family homolog 2 OS=Mus musculus GN=Fermt2 PE=1 SV=1	6.25	78484.9	1456.89	Q8CIB5	18	42.06	0.0024	FERM2_MOUSE	1650.89	1594.22	1984.26	2010.21	1780.14	1641.7	1546.72	1972.06	1872.76	1954.1	1804.38	1999.18	1817.55	1977.66
Rtn4	Reticulon-4 OS=Mus musculus GN=Rtn4 PE=1 SV=2	4.27	127127	1298.45	Q99P72	24	39.59	0.0024	RTN4_MOUSE	2183.6	1814.44	1226.2	1598.11	1968.67	1927.14	2165.35	2005.28	1349.82	1570.35	1900.44	1893.11	1800.21	1958.79
Col6a2	Collagen alpha-2(VI) chain OS=Mus musculus GN=Col6a2 PE=2 SV=3	5.97	111475	2047.86	Q02788	22	31.04	0	CO6A2_MOUSE	1506.23	1571.28	1411.44	1544.26	2089.47	2156.4	1473.08	1637.99	1337.26	1646.5	2004.22	2336.33	1726.2	1878.27
Lamb1	Laminin subunit beta-1 OS=Mus musculus GN=Lamb1 PE=1 SV=3	4.63	204333	599.744	P02469	26	19.04	0.0024	LAMB1_MOUSE	1924.29	1640.06	1617.73	1682.41	1651.43	1746.91	1557.45	1981.52	1459.69	1608.01	1726.27	2003.03	1716.57	1867.78
Vcl	Vinculin OS=Mus musculus GN=Vcl PE=1 SV=4	5.65	117288	2537.91	Q64727	45	52.16	0	VINC_MOUSE	1872.06	2259.96	1670.53	1760.26	1701.9	1771.58	1247.64	2229.1	1341.13	1283.87	1143.73	1836.28	1676.5	1824.19
Eef2	Elongation factor 2 OS=Mus musculus GN=Eef2 PE=1 SV=2	6.39	96283.7	5008.39	P58252	40	56.99	0	EF2_MOUSE	1583.68	2003	1594.4	1433.57	1708.42	1941.42	1602.02	1918.02	1530.79	1263.8	1608.73	1910.95	1674.9	1822.45
Msn	Moesin OS=Mus musculus GN=Msn PE=1 SV=3	6.18	67881.2	7896.92	P26041	36	66.2	0	MOES_MOUSE	1703.21	1584.85	2103.42	1536.77	1590.4	1463.25	1719.18	1447.26	2275.49	1617.92	1458.94	1498.43	1666.6	1813.41
Nid1	Nidogen-1 OS=Mus musculus GN=Nid1 PE=1 SV=2	5.08	139389	1292.8	P10493	28	39.12	0.0024	NID1_MOUSE	1553.28	1628.78	1478.94	1589.48	1843.7	1799.65	1563.14	1768.63	1399.25	1676.79	1653.38	1712.96	1639	1783.38
Hspa12a	Heat shock 70 kDa protein 12A OS=Mus musculus GN=Hspa12a PE=1 SV=1	6.32	75213.7	6574.73	Q8K0U4	29	62.22	0	HS12A_MOUSE	1956.57	1474.72	1317.4	1538.94	1665	1565.61	1646.27	1782.38	1426.32	1680.5	1602.67	1784.09	1620.04	1762.75
Eno3	Beta-enolase OS=Mus musculus GN=Eno3 PE=1 SV=3	6.81	47367.1	31338	P21550	18	58.99	0	ENOB_MOUSE	1275.79	1078.58	1234.11	1352.5	2343.16	1995.36	1437.91	1099	1256.06	1511.01	2631.9	2208.7	1618.67	1761.27
Hadha	Trifunctional enzyme subunit alpha, mitochondrial OS=Mus musculus GN=Hadha PE=1 SV=1	9.46	83354.3	4973.85	Q8BMS1	29	55.44	0	ECHA_MOUSE	1537.34	1368.32	1479.61	1783.4	1705.98	1591.89	1437.61	1546.42	1554.1	1823.97	1684.45	1901.6	1617.89	1760.42
Lmna	Prelamin-A/C OS=Mus musculus GN=Lmna PE=1 SV=2	6.55	74522.8	337.812	P48678	11	19.55	0.0024	LMNA_MOUSE	1288.32	1233.03	1421	1524.04	1959.81	1909.9	1371.83	1341.14	1641.52	1631.23	2121.62	1889.56	1611.08	1753.01
Cct6a	T-complex protein 1 subunit zeta OS=Mus musculus GN=Cct6a PE=1 SV=3	6.66	58460.6	978.09	P80317	14	40.68	0.0024	TCPZ_MOUSE	1222.5	1328.42	1948.26	2445.14	941.441	886.896	888.541	1482.55	2578.72	3148.88	954.784	1107.47	1577.8	1716.79
Slc44a1	Choline transporter-like protein 1 OS=Mus musculus GN=Slc44a1 PE=1 SV=3	8.72	74606.9	5609.15	Q6X893	17	32.31	0	CTL1_MOUSE	1395.49	1423.19	1420.26	1669.7	1625.75	1640.74	1209.67	1334.05	1411.84	1708.85	1514.01	1677.86	1502.62	1634.99
Apoa4	Apolipoprotein A-IV OS=Mus musculus GN=Apoa4 PE=1 SV=3	5.18	45029.1	3137.92	P06728	21	73.67	0	APOA4_MOUSE	1192.99	1671.51	1349.85	2175.81	1542.29	1732.18	1448.59	1616.18	1632.93	1883.61	840.812	864.24	1495.92	1627.7
Epb41l3	Band 4.1-like protein 3 OS=Mus musculus GN=Epb41l3 PE=1 SV=1	5.03	103794	3104.58	Q9WV92	38	52.21	0	E41L3_MOUSE	1849.76	1777.89	999.287	1457.57	1556.79	1452.86	1653.72	1640.62	992.747	1443.65	1507.12	1500.85	1486.07	1616.99
Ptrf	Polymerase I and transcript release factor OS=Mus musculus GN=Ptrf PE=1 SV=1	5.26	43953.7	8967.92	O54724	12	35.46	0	PTRF_MOUSE	1824.42	1751.84	1060.1	1176.55	1594.45	1693.53	1661.58	1666.97	985.237	1193.23	1462.13	1598.33	1472.36	1602.07
Rab10	Ras-related protein Rab-10 OS=Mus musculus GN=Rab10 PE=1 SV=1	8.57	22769.1	5546.44	P61027	9	46.5	0	RAB10_MOUSE	1447.77	1318.74	1278.03	1423.9	2108.07	1240.34	1290.2	1448.41	1259.17	1421.84	1260.13	2025.59	1460.18	1588.81
Ywhaz	14-3-3 protein zeta/delta OS=Mus musculus GN=Ywhaz PE=1 SV=1	4.53	27942.3	26136.6	P63101	14	56.33	0	1433Z_MOUSE	2227.99	1947.39	746.136	876.405	1377.19	1290.26	2383.98	2032.24	774.016	910.922	1435.93	1405.54	1450.67	1578.46
Syncrip	Heterogeneous nuclear ribonucleoprotein Q OS=Mus musculus GN=Syncrip PE=1 SV=2	8.79	69860.9	532.418	Q7TMK9	7	15.89	0.0024	HNRPQ_MOUSE	1463.51	1185.33	1240.12	1550.89	1707.74	1558.15	1443.97	1100.66	1290.16	1438.52	1685.83	1539.42	1433.69	1559.99
Snx2	Sorting nexin-2 OS=Mus musculus GN=Snx2 PE=1 SV=2	4.85	58585.3	484.972	Q9CWK8	4	9.44	0.0024	SNX2_MOUSE	1101.18	1334.11	1430.08	2294.73	1741.44	1240.3	1151.67	1549.59	1627.25	1313.57	1051.32	1167.85	1416.92	1541.74
Phgdh	D-3-phosphoglycerate dehydrogenase OS=Mus musculus GN=Phgdh PE=1 SV=3	6.1	57384	2907.94	Q61753	18	42.4	0	SERA_MOUSE	1813.06	1375.02	1490.73	1794.88	913.092	680.314	2020.9	1286.87	1656.28	2475.81	447.837	818.647	1397.79	1520.92
Hsp90ab1	Heat shock protein HSP 90-beta OS=Mus musculus GN=Hsp90ab1 PE=1 SV=3	4.78	83623.5	6465.2	P11499	31	49.03	0	HS90B_MOUSE	2009.23	1770.71	749.735	805.732	1439.36	1556.64	1985.01	1694.36	713.836	915.56	1464.21	1500.77	1383.76	1505.66
Oxsr1	Serine/threonine-protein kinase OSR1 OS=Mus musculus GN=Oxsr1 PE=1 SV=1	5.99	58498.8	365.661	Q6P9R2	5	13.28	0.0024	OXSR1_MOUSE	848.112	741.324	2000.47	1822.91	864.333	847.741	887.317	738.405	3484.26	2458.25	874.21	899.845	1372.27	1493.15
Fga	Fibrinogen alpha chain OS=Mus musculus GN=Fga PE=2 SV=1	5.69	88170.7	2970.33	E9PV24	17	28.77	0	FIBA_MOUSE	1366.27	1264.37	1352.87	1521.25	1476.58	1435.6	1266.5	1182.83	1205.29	1433.87	1367	1398.55	1355.91	1475.36
Ctnnd1	Catenin delta-1 OS=Mus musculus GN=Ctnnd1 PE=1 SV=2	6.41	105495	648.283	P30999	25	39.34	0.0024	CTND1_MOUSE	1602.04	1723.97	1175.2	1558.09	1252.54	973.036	2005.19	1989.12	909.367	1104.31	945.987	954.478	1349.44	1468.32
Cat	Catalase OS=Mus musculus GN=Cat PE=1 SV=4	7.79	60080.6	7642.95	P24270	29	70.59	0	CATA_MOUSE	1465.7	1366.17	1717.82	1208.78	1100.65	1143.73	1608.23	1448.8	1639.02	1323.73	1075.7	1025.61	1343.66	1462.03
Serpinh1	Serpin H1 OS=Mus musculus GN=Serpinh1 PE=1 SV=3	9.19	46647.7	9418.07	P19324	17	58.51	0	SERPH_MOUSE	1123.26	1845.64	1257.18	1190.01	1455.85	1761.57	1083.06	1081.22	1035.3	1130.45	1384.2	1434.03	1315.15	1431
Cadm4	Cell adhesion molecule 4 OS=Mus musculus GN=Cadm4 PE=1 SV=1	5.88	43179.6	7228.53	Q8R464	11	44.59	0	CADM4_MOUSE	1326.21	1335.78	1104.39	1292.71	1448.55	1392.23	1345.1	1245.87	1080.52	1257.61	1477.79	1415.47	1310.18	1425.6
Klc2	Kinesin light chain 2 OS=Mus musculus GN=Klc2 PE=1 SV=1	6.81	67061.6	770.086	O88448	9	20.03	0.0024	KLC2_MOUSE	1224.88	1259.68	1385.93	1500.19	1352.5	1300.24	1227.06	1197.39	1068.31	1464.1	1306.33	1394.73	1306.78	1421.9
Atp1b1	Sodium/potassium-transporting ATPase subunit beta-1 OS=Mus musculus GN=Atp1b1 PE=1 SV=1	8.78	35593.8	5690.33	P14094	13	38.82	0	AT1B1_MOUSE	1588.16	1397.28	1063.65	1159.69	1354.27	1331.76	1469.19	1395.8	989.062	1177.47	1360.78	1354.93	1303.5	1418.33
Myh11	Myosin-11 OS=Mus musculus GN=Myh11 PE=1 SV=1	5.2	227884	628.999	O08638	33	20.64	0.0024	MYH11_MOUSE	1248.2	1266.78	1315.92	1427.25	1368.07	1325.68	1279.69	1200.86	1197.65	1522.41	1206.34	1161.06	1293.33	1407.26
Mdh2	Malate dehydrogenase, mitochondrial OS=Mus musculus GN=Mdh2 PE=1 SV=3	8.82	36067.7	13787.5	P08249	17	75.15	0	MDHM_MOUSE	1216.07	1163.33	1182.21	1390.31	1359.48	1415.57	1069.95	1132.16	1163.73	1435.58	1455.45	1384.37	1280.69	1393.5
Canx	Calnexin OS=Mus musculus GN=Canx PE=1 SV=1	4.29	67677.2	2519.66	P35564	18	44.67	0	CALX_MOUSE	1721.02	1690.3	802.676	946.466	1360.38	1355.21	1582.89	1477.21	787.641	983.387	1328.32	1293.88	1277.45	1389.98
Kif5c	Kinesin heavy chain isoform 5C OS=Mus musculus GN=Kif5c PE=1 SV=3	5.79	109845	912.139	P28738	19	24.27	0.0024	KIF5C_MOUSE	1043.25	1119.16	1682.52	1837.9	1002.88	1635.19	1076.49	1131.65	1421.54	1728.46	709.034	806.37	1266.2	1377.75
Got2	Aspartate aminotransferase, mitochondrial OS=Mus musculus GN=Got2 PE=1 SV=1	9.26	47810.7	8330.48	P05202	23	64.88	0	AATM_MOUSE	1491.85	1594.44	995.34	1138.8	1087.54	1064.21	1499.26	1630.49	908.108	1084.38	1137.99	1122.52	1229.58	1337.9
Dpysl3	Dihydropyrimidinase-related protein 3 OS=Mus musculus GN=Dpysl3 PE=1 SV=1	6.03	62335.6	9337.57	Q62188	23	69.47	0	DPYL3_MOUSE	1109.77	1054.16	1094.6	1268.18	1355.51	1370.28	1041.18	1114.26	1117.34	1273.95	1280.74	1281.84	1196.82	1302.25
Igh-3	Ig gamma-2B chain C region OS=Mus musculus GN=Igh-3 PE=1 SV=3	6.07	45000.8	4685.55	P01867	8	30.94	0	IGG2B_MOUSE	734.11	665.214	1345.08	1559.21	1367.34	1294.1	689.451	674.854	1356.48	1658.95	1294.24	1205.69	1153.73	1255.36
Ehd1	EH domain-containing protein 1 OS=Mus musculus GN=Ehd1 PE=1 SV=1	6.36	60659.9	1928.81	Q9WVK4	20	51.87	0	EHD1_MOUSE	848.396	735.593	3119.47	966.149	673.204	600.531	789.49	681.098	3051.84	994.78	657.755	591.418	1142.48	1243.12
Nme2	Nucleoside diphosphate kinase B OS=Mus musculus GN=Nme2 PE=1 SV=1	7.37	17477.2	18325.8	Q01768	12	79.61	0	NDKB_MOUSE	1284.85	1248.35	1031.86	1222.32	1061.33	1074.96	1139.99	1256.84	1013.4	1224.84	1007.65	1030.53	1133.08	1232.89
Rac1	Ras-related C3 botulinum toxin substrate 1 OS=Mus musculus GN=Rac1 PE=1 SV=1	8.57	21849.3	13186.5	P63001	7	40.63	0	RAC1_MOUSE	1245.65	1147.63	823.344	996.824	1269.26	1272.68	1230.79	1051.31	776.802	1110.83	1259.11	1319	1125.27	1224.4
Postn	Periostin OS=Mus musculus GN=Postn PE=1 SV=2	7.27	93828.1	1360.85	Q62009	25	45.82	0.0024	POSTN_MOUSE	1231.49	1429.88	713.55	1015.59	1066.9	1192.59	1258.77	1186.85	1015.95	1055.26	1128.26	1191.43	1123.88	1222.88
Ca2	Carbonic anhydrase 2 OS=Mus musculus GN=Ca2 PE=1 SV=4	6.53	29146.6	10660.3	P00920	11	67.69	0	CAH2_MOUSE	1035.55	1029.78	1556	1838.31	709.692	668.916	997.68	992.5	1530.6	1858.71	600.462	620.09	1119.86	1218.51
Gdi1	Rab GDP dissociation inhibitor alpha OS=Mus musculus GN=Gdi1 PE=1 SV=3	4.76	51092	5749.57	P50396	19	54.14	0	GDIA_MOUSE	429.855	350.206	373.133	461.291	463.936	357.435	496.723	408.841	332.032	338.486	4488.81	4904.53	1117.11	1215.52
Slc25a4	ADP/ATP translocase 1 OS=Mus musculus GN=Slc25a4 PE=1 SV=4	10.02	33132.4	13217.6	P48962	16	51.01	0	ADT1_MOUSE	1363.03	1218.48	770.747	908.325	1170.13	1167.78	1427.32	1245.27	771.591	907.023	1145.37	1128.89	1102	1199.08
Itpr3	Inositol 1,4,5-trisphosphate receptor type 3 OS=Mus musculus GN=Itpr3 PE=1 SV=3	6.08	307127	387.91	P70227	31	17.23	0.0024	ITPR3_MOUSE	1371.11	1017.51	709.575	820.985	1148.66	1199.53	1073.89	1223.46	959.661	1080.86	1271.73	1316.29	1099.44	1196.29
Serpinf1	Pigment epithelium-derived factor OS=Mus musculus GN=Serpinf1 PE=1 SV=2	6.52	46291.2	4662.97	P97298	17	53.48	0	PEDF_MOUSE	1198.66	978.359	1085.71	1108.07	1027.65	903.202	1045.72	1050.07	1122.12	1495.32	1005.54	1159.89	1098.36	1195.12
	Ig gamma-2A chain C region secreted form OS=Mus musculus PE=1 SV=1	8.2	37109.2	4385.46	P01864	6	24.78	0	GCAB_MOUSE	798.395	790.514	1211.09	1377.5	1179.16	1230.93	778.659	741.768	1207.79	1471.81	1150.97	1119.94	1088.21	1184.07
Tubb2a	Tubulin beta-2A chain OS=Mus musculus GN=Tubb2a PE=1 SV=1	4.59	50306.3	45199.6	Q7TMM9	25	71.91	0	TBB2A_MOUSE	1348.82	1231.95	636.651	727.172	1292.68	1351.2	1265.09	1190.27	598.855	759.749	1282.76	1268.19	1079.45	1174.54
Ogdh	2-oxoglutarate dehydrogenase, mitochondrial OS=Mus musculus GN=Ogdh PE=1 SV=3	6.36	117647	1247.95	Q60597	25	37.24	0.0024	ODO1_MOUSE	976.205	1025.4	1050.11	1178.69	1063.76	1091.1	1230.36	1107.58	987.569	751.47	1061.62	1255.9	1064.98	1158.8
Cs	Citrate synthase, mitochondrial OS=Mus musculus GN=Cs PE=1 SV=1	8.72	52021.9	5860.02	Q9CZU6	18	54.09	0	CISY_MOUSE	1173.34	1266.68	866.576	972.97	1116.29	1077.86	1145.5	1156.61	842.786	1037.02	991.994	1057.11	1058.73	1151.99
Tppp3	Tubulin polymerization-promoting protein family member 3 OS=Mus musculus GN=Tppp3 PE=1 SV=1	9.52	19136.6	16991.8	Q9CRB6	11	44.32	0	TPPP3_MOUSE	1188.26	1024.67	976.774	1219.26	935.595	909.877	1276.46	994.924	1054.07	1284.83	876.155	900.266	1053.43	1146.23
Apoh	Beta-2-glycoprotein 1 OS=Mus musculus GN=Apoh PE=1 SV=1	8.12	39930.5	2748.02	Q01339	13	49.28	0	APOH_MOUSE	505.885	2227.17	2801.15	979.026	646.934	1102.98	486.251	1515.65	737.374	540.702	492.838	520.157	1046.34	1138.52
Vat1l	Synaptic vesicle membrane protein VAT-1 homolog-like OS=Mus musculus GN=Vat1l PE=2 SV=2	4.79	46159.6	6637.83	Q80TB8	21	75.3	0	VAT1L_MOUSE	1404.15	1327.18	783.335	839.395	1005.19	938.736	1508.69	1319.24	730.499	765.33	1069.54	861.157	1046.04	1138.19
Itga6	Integrin alpha-6 OS=Mus musculus GN=Itga6 PE=1 SV=3	6.63	123299	1591.42	Q61739	28	35.93	0.0024	ITA6_MOUSE	1214.35	1102.58	800.457	915.028	1119.39	1076.33	1135.29	1139.9	889.35	904.163	1132.26	1097.61	1043.89	1135.85
Fgg	Fibrinogen gamma chain OS=Mus musculus GN=Fgg PE=1 SV=1	5.44	50075.8	6338.71	Q8VCM7	21	61.24	0	FIBG_MOUSE	1046.35	977.797	872.296	1018.07	1181.5	1180.28	968.489	941.782	874.548	1103.08	1188.47	1154.06	1042.23	1134.04
Col4a2	Collagen alpha-2(IV) chain OS=Mus musculus GN=Col4a2 PE=2 SV=4	8.5	168523	360.021	P08122	7	6.03	0.0024	CO4A2_MOUSE	901.656	797.744	1054.81	1004.05	1145.57	1206.55	860.169	753.949	987.785	1206.45	1145.03	1204.28	1022.34	1112.4
Actn4	Alpha-actinin-4 OS=Mus musculus GN=Actn4 PE=1 SV=1	5.09	105434	2717.03	P57780	42	58.77	0	ACTN4_MOUSE	1079.39	1166.93	731.529	908.789	1114.43	1142.07	999.243	1087.21	796.84	844.307	1084.75	1281.12	1019.72	1109.55
Col15a1	Collagen alpha-1(XV) chain OS=Mus musculus GN=Col15a1 PE=1 SV=2	4.6	140929	413.672	O35206	10	10.53	0.0024	COFA1_MOUSE	1155.54	1071.82	884.978	1038.74	1055.2	970.145	1139.85	974.051	838.77	1087.47	1006.03	950.359	1014.41	1103.78
Aldh2	Aldehyde dehydrogenase, mitochondrial OS=Mus musculus GN=Aldh2 PE=1 SV=1	7.49	57050.9	5156.31	P47738	21	54.72	0	ALDH2_MOUSE	1121.5	936.588	1021.02	1175	813.048	804.588	1162.2	993.333	1134.39	1266.02	903.454	826.72	1013.16	1102.41
Actn1	Alpha-actinin-1 OS=Mus musculus GN=Actn1 PE=1 SV=1	5.07	103696	1798.99	Q7TPR4	28	43.27	0	ACTN1_MOUSE	745.646	660.921	1892.78	2050.8	640.743	576.935	746.083	642.664	363.421	2546.42	647.225	594.245	1008.99	1097.88
Cryab	Alpha-crystallin B chain OS=Mus musculus GN=Cryab PE=1 SV=2	6.92	20068.8	15419.8	P23927	10	80.57	0	CRYAB_MOUSE	1029.2	966.238	867.602	1007.02	1072.79	1030.54	916.315	1048.6	903.033	1042.46	1050.8	1043.83	998.202	1086.14
Mgll	Monoglyceride lipase OS=Mus musculus GN=Mgll PE=1 SV=1	6.72	33729.7	1450.69	O35678	11	53.14	0.0024	MGLL_MOUSE	973.763	976.37	1743.11	890.807	766.714	594.327	953.022	945.146	1739.55	935.597	742.41	643.122	991.995	1079.38
Atp1a2	Sodium/potassium-transporting ATPase subunit alpha-2 OS=Mus musculus GN=Atp1a2 PE=1 SV=1	5.23	113529	7671.66	Q6PIE5	43	48.63	0	AT1A2_MOUSE	1083.93	1098	872.659	969.428	1007.03	978.808	1114.53	1029.77	830.099	960.838	926.003	918.645	982.478	1069.03
Gnb1	Guanine nucleotide-binding protein G(I)/G(S)/G(T) subunit beta-1 OS=Mus musculus GN=Gnb1 PE=1 SV=3	5.54	38175.4	15463.4	P62874	9	53.24	0	GBB1_MOUSE	1064.27	897.327	731.586	849.255	1116.39	1111.91	1047.23	986.569	772.315	938.061	1130.69	1143.02	982.385	1068.93
Vdac1	Voltage-dependent anion-selective channel protein 1 OS=Mus musculus GN=Vdac1 PE=1 SV=3	8.67	32522.6	7058.29	Q60932	13	62.5	0	VDAC1_MOUSE	1099.23	1073.52	730.807	919.738	1077.73	1062.06	1033.17	1042.95	701.433	906.548	1039.28	1052.22	978.224	1064.4
Vwa5a	von Willebrand factor A domain-containing protein 5A OS=Mus musculus GN=Vwa5a PE=1 SV=2	6.13	87884.3	2833.69	Q99KC8	34	61.54	0	VMA5A_MOUSE	936.893	963.265	951.557	1101.32	956.039	769.077	1047.08	1103.65	962.64	1062.94	994.459	815.388	972.026	1057.65
Eef1a2	Elongation factor 1-alpha 2 OS=Mus musculus GN=Eef1a2 PE=1 SV=1	9.35	50796.4	12532.7	P62631	17	62.42	0	EF1A2_MOUSE	914.017	791.984	804.921	994.268	1126.9	1103.5	789.995	911.847	821.512	1059.78	1177.4	1156.35	971.039	1056.58
Tubb4a	Tubulin beta-4A chain OS=Mus musculus GN=Tubb4a PE=1 SV=3	4.59	50042.1	45473.9	Q9D6F9	22	74.32	0	TBB4A_MOUSE	1198.34	1123.22	621.216	673.814	1120.06	1014.77	1201.76	1166.88	617.211	716.802	1118.42	1051.02	968.626	1053.96
Mif	Macrophage migration inhibitory factor OS=Mus musculus GN=Mif PE=1 SV=2	7.16	12675.4	2172.19	P34884	4	42.61	0	MIF_MOUSE	978.853	1099.31	886.876	1035.25	909.651	861.62	1001.9	1041.17	840.487	1004.03	874.135	963.36	958.053	1042.45
Dcn	Decorin OS=Mus musculus GN=Dcn PE=2 SV=1	8.85	40151.2	6526.45	P28654	10	35.59	0	PGS2_MOUSE	1043.11	913.38	742.204	823.238	1098.4	1043.72	1028.61	911.022	776.975	901.195	1117.63	1078.03	956.46	1040.72
Gpi	Glucose-6-phosphate isomerase OS=Mus musculus GN=Gpi PE=1 SV=4	8.2	62995.1	3340.18	P06745	18	44.27	0	G6PI_MOUSE	702.322	546.465	1052.76	1306.14	1073.6	947.436	453.039	722.533	1166.56	1200.29	1027.47	1226.75	952.113	1035.99
Cand1	Cullin-associated NEDD8-dissociated protein 1 OS=Mus musculus GN=Cand1 PE=2 SV=2	5.4	138043	621.046	Q6ZQ38	28	28.62	0.0024	CAND1_MOUSE	672.477	685.376	2673.21	715.816	603.89	571.364	614.139	677.701	2364.51	643.773	570.869	578.79	947.659	1031.14
Apoa1	Apolipoprotein A-I OS=Mus musculus GN=Apoa1 PE=1 SV=2	5.39	30615.6	12189.5	Q00623	18	67.8	0	APOA1_MOUSE	1211.11	1102.76	569.001	678.094	964.279	858.763	1169.3	1085.31	572.7	756.952	920.057	936.914	902.103	981.573
Ywhae	14-3-3 protein epsilon OS=Mus musculus GN=Ywhae PE=1 SV=1	4.44	29345	15551	P62259	18	68.24	0	1433E_MOUSE	1333.85	1320.75	461.016	526.068	802.958	783.312	1519.57	1283.25	484.316	569.221	829.352	849.06	896.893	975.904
Uqcrc1	Cytochrome b-c1 complex subunit 1, mitochondrial OS=Mus musculus GN=Uqcrc1 PE=1 SV=2	5.76	53479.1	3878.07	Q9CZ13	18	53.75	0	QCR1_MOUSE	962.295	862.013	800.929	904.902	927.451	988.603	892.334	853.228	755.211	943.575	880.456	967.56	894.88	973.713
Ahcy	Adenosylhomocysteinase OS=Mus musculus GN=Ahcy PE=1 SV=3	6.07	48201.5	4423.35	P50247	17	53.7	0	SAHH_MOUSE	994.988	1068.24	1079.47	1100.92	701.941	729.506	691.261	1076.1	857.56	959.301	550.746	815.101	885.428	963.428
Uba1	Ubiquitin-like modifier-activating enzyme 1 OS=Mus musculus GN=Uba1 PE=1 SV=1	5.3	119007	891.708	Q02053	29	43.48	0.0024	UBA1_MOUSE	1155.54	1044.58	1508.51	494.356	565.912	563.477	896.534	1035.26	1514.77	508.238	493.742	637.441	868.197	944.679
Slc25a3	Phosphate carrier protein, mitochondrial OS=Mus musculus GN=Slc25a3 PE=1 SV=1	9.49	40088.6	4047.01	Q8VEM8	13	46.78	0	MPCP_MOUSE	936.923	908.23	593.55	755.495	953.239	925.859	921.195	850.381	625.657	776.858	962.47	909.938	843.316	917.607
Atp2a1	Sarcoplasmic/endoplasmic reticulum calcium ATPase 1 OS=Mus musculus GN=Atp2a1 PE=1 SV=1	4.95	110794	2933.4	Q8R429	30	37.73	0	AT2A1_MOUSE	441.912	396.936	430.024	476.511	1602.47	1525.84	438.742	472.061	441.853	520.618	1813.77	1545.53	842.19	916.381
Fgb	Fibrinogen beta chain OS=Mus musculus GN=Fgb PE=2 SV=1	6.71	55437.2	5527.62	Q8K0E8	26	69.02	0	FIBB_MOUSE	803.988	865.907	807.597	880.937	899.362	890.84	699.79	858.151	746.394	873.554	740.92	934.428	833.489	906.914
Cfl1	Cofilin-1 OS=Mus musculus GN=Cfl1 PE=1 SV=3	8.22	18787.7	32319.2	P18760	13	66.27	0	COF1_MOUSE	977.13	954.487	771.566	867.153	696.655	755.974	923.285	951.06	701.692	853.646	677.14	702.887	819.39	891.572
Rpl10	60S ribosomal protein L10 OS=Mus musculus GN=Rpl10 PE=1 SV=3	10.49	25060.2	807.525	Q6ZWV3	7	36.45	0.0024	RL10_MOUSE	75.3185	76.8282	48.9199	60.178	87.8458	82.9734	2444.72	2399.44	1986.4	2411.01	75.5062	77.0666	818.851	890.986
Anxa1	Annexin A1 OS=Mus musculus GN=Anxa1 PE=1 SV=2	7.17	39019.5	13268.3	P10107	23	69.94	0	ANXA1_MOUSE	879.074	773.462	784.409	899.626	856.022	756.348	802.099	741.026	782.325	937.199	766.699	809.326	815.635	887.486
Myo1c	Unconventional myosin-Ic OS=Mus musculus GN=Myo1c PE=1 SV=2	9.62	122800	1569.25	Q9WTI7	33	41.58	0.0024	MYO1C_MOUSE	733.186	1203.06	892.877	699.838	844.735	947.493	693.201	824.289	558.829	681.326	780.591	921.824	815.104	886.909
Calr	Calreticulin OS=Mus musculus GN=Calr PE=1 SV=1	4.14	48165.7	1747.88	P14211	14	46.15	0	CALR_MOUSE	957.67	1183.43	659.109	725.636	781.092	850.017	567.701	1108.07	620.336	682.346	658.655	871.631	805.475	876.432
Hadhb	Trifunctional enzyme subunit beta, mitochondrial OS=Mus musculus GN=Hadhb PE=1 SV=1	9.73	51671.6	3115.63	Q99JY0	20	61.47	0	ECHB_MOUSE	786.892	808.205	715.873	906.59	896.464	876.884	703.934	716.483	715.631	785.172	815.781	919.128	803.92	874.74
Gjc3	Gap junction gamma-3 protein OS=Mus musculus GN=Gjc3 PE=2 SV=2	8.37	30805.9	4358.36	Q921C1	11	49.44	0	CXG3_MOUSE	844.316	900.731	728.763	902.807	858.898	811.93	744.293	814.949	742.291	650.673	757.633	757.292	792.881	862.729
Mtco2	Cytochrome c oxidase subunit 2 OS=Mus musculus GN=Mtco2 PE=1 SV=1	4.41	26147.6	2736.22	P00405	7	48.02	0	COX2_MOUSE	831.178	715.425	643.92	768.669	840.989	820.448	845.372	717.283	673.797	827.435	878.392	792.818	779.644	848.325
Abat	4-aminobutyrate aminotransferase, mitochondrial OS=Mus musculus GN=Abat PE=1 SV=1	8.01	57136.3	582.845	P61922	7	24.8	0.0024	GABT_MOUSE	456.219	418.065	2742.9	641.324	258.165	222.702	359.247	415.239	2833.25	556.367	177.377	211.057	774.326	842.539
Vapb	Vesicle-associated membrane protein-associated protein B OS=Mus musculus GN=Vapb PE=2 SV=3	7.84	27174.4	2015.68	Q9QY76	7	43.21	0	VAPB_MOUSE	695.024	1367.31	1106.46	655.21	479.482	485.484	671.95	1197.69	1008.22	641.507	438.927	405.818	762.758	829.952
Rrbp1	Ribosome-binding protein 1 OS=Mus musculus GN=Rrbp1 PE=1 SV=2	9.81	173336	408.913	Q99PL5	20	16.26	0.0024	RRBP1_MOUSE	865.64	814.59	558.014	720.883	827.226	718.55	879.615	866.653	535.864	648.161	818.979	692.13	745.525	811.201
Tln2	Talin-2 OS=Mus musculus GN=Tln2 PE=1 SV=3	5.44	255902	421.302	Q71LX4	20	11.58	0.0024	TLN2_MOUSE	744.622	881.894	584.821	710.187	707.071	788.967	785.531	901.631	444.339	716.864	796.91	876.437	744.94	810.564
Glg1	Golgi apparatus protein 1 OS=Mus musculus GN=Glg1 PE=1 SV=1	6.41	137612	316.95	Q61543	12	12.94	0.003	GSLG1_MOUSE	908.174	956.987	435.049	573.724	732.399	819.696	979.746	1072.44	416.36	481.465	777.489	766.038	743.298	808.777
Aifm1	Apoptosis-inducing factor 1, mitochondrial OS=Mus musculus GN=Aifm1 PE=1 SV=1	9.52	66993.7	292.142	Q9Z0X1	4	7.84	0.003	AIFM1_MOUSE	1045.46	983.802	244.575	411.994	892.426	953.839	1014.51	956.516	235.989	361.291	931.47	867.139	741.585	806.913
Ldha	L-lactate dehydrogenase A chain OS=Mus musculus GN=Ldha PE=1 SV=3	7.67	36840.8	8252.13	P06151	18	76.51	0	LDHA_MOUSE	647.712	897.098	689.344	697.774	859.052	1013.71	584.862	525.34	582.831	695.911	798.355	808.103	733.341	797.943
Atp5o	ATP synthase subunit O, mitochondrial OS=Mus musculus GN=Atp5o PE=1 SV=1	10.41	23420.6	9777.49	Q9DB20	12	67.14	0	ATPO_MOUSE	602.243	694.625	732.942	942.711	574.158	531.733	683.343	719.206	860.137	1249.33	574.951	549.924	726.275	790.255
Gstm1	Glutathione S-transferase Mu 1 OS=Mus musculus GN=Gstm1 PE=1 SV=2	8.12	26084.1	14840.9	P10649	14	61.47	0	GSTM1_MOUSE	828.31	722.936	719.888	873.374	601.559	586.064	859.654	744.903	697.444	873.819	599.855	601.891	725.808	789.747
Mpp6	MAGUK p55 subfamily member 6 OS=Mus musculus GN=Mpp6 PE=1 SV=1	5.96	62916	2891.73	Q9JLB0	27	58.23	0	MPP6_MOUSE	641.185	1211.29	601.33	565.697	682.967	663.906	638.537	1199.58	582.566	561.801	662.54	665.314	723.059	786.756
Drp2	Dystrophin-related protein 2 OS=Mus musculus GN=Drp2 PE=2 SV=1	5.8	109305	1329.57	Q05AA6	26	43.99	0.0024	DRP2_MOUSE	1010.85	766.077	568.71	665.864	647.521	599.75	927.44	782.029	571.574	733.92	687.409	633.011	716.179	779.27
Uqcrc2	Cytochrome b-c1 complex subunit 2, mitochondrial OS=Mus musculus GN=Uqcrc2 PE=1 SV=1	9.57	48292	5064.01	Q9DB77	17	56.51	0	QCR2_MOUSE	745.994	690.528	595.997	726.735	722.987	755.299	725.496	729.665	593.691	798.888	752.519	737.071	714.572	777.521
Dusp15	Dual specificity protein phosphatase 15 OS=Mus musculus GN=Dusp15 PE=2 SV=3	9.57	26642.5	8469.88	Q8R4V2	12	57.02	0	DUS15_MOUSE	632.512	639.18	749.621	847.851	782.646	778.255	549.167	615.926	682.789	810.645	689.378	777.84	712.984	775.793
Anxa7	Annexin A7 OS=Mus musculus GN=Anxa7 PE=1 SV=2	5.81	50210.5	857.269	Q07076	18	37.8	0.0024	ANXA7_MOUSE	791.031	665.355	836.064	806.546	554.997	442.135	767.286	757.206	804.08	959.015	572.675	497.98	704.531	766.595
Plg	Plasminogen OS=Mus musculus GN=Plg PE=1 SV=3	6.17	93545.3	1725.31	P20918	31	55.91	0.0024	PLMN_MOUSE	766.004	742.853	714.334	797.948	609.908	626.701	694.336	694.496	718.31	852.309	556.28	660.89	702.864	764.782
Sdha	Succinate dehydrogenase [ubiquinone] flavoprotein subunit, mitochondrial OS=Mus musculus GN=Sdha PE=1 SV=1	7.03	73669	2692.87	Q8K2B3	22	53.92	0	SDHA_MOUSE	709.217	769.81	726.526	781.413	707.166	705.471	592.103	744.502	661.039	678.78	601.05	636.215	692.774	753.803
Ehd2	EH domain-containing protein 2 OS=Mus musculus GN=Ehd2 PE=1 SV=1	6.05	61345.7	5836.85	Q8BH64	27	67.4	0	EHD2_MOUSE	749.692	712.893	508.002	655.935	733.971	683.709	752.865	943.061	511.934	576.718	721.32	708.045	688.179	748.803
Prdx2	Peroxiredoxin-2 OS=Mus musculus GN=Prdx2 PE=1 SV=3	5.04	21949.8	10081.1	Q61171	11	71.21	0	PRDX2_MOUSE	673.247	651.832	666.135	684.281	720.679	709.4	648.691	616.899	623.354	728.986	738.052	765.88	685.62	746.018
Hsp90b1	Endoplasmin OS=Mus musculus GN=Hsp90b1 PE=1 SV=2	4.55	92761.1	2200.96	P08113	30	43.64	0	ENPL_MOUSE	867.31	802.176	434.327	529.521	765.631	761.574	814.02	751.125	426.662	509.13	785.766	779.573	685.568	745.962
Sec31a	Protein transport protein Sec31A OS=Mus musculus GN=Sec31a PE=1 SV=2	6.29	134596	664.667	Q3UPL0	19	25.28	0.0024	SC31A_MOUSE	775.953	565.232	591.785	695.113	729.125	735.794	498.491	775.303	583.982	746.81	619.46	877.456	682.875	743.032
Csrp1	Cysteine and glycine-rich protein 1 OS=Mus musculus GN=Csrp1 PE=1 SV=3	8.55	21438.8	11826.8	P97315	9	60.62	0	CSRP1_MOUSE	692.649	640.249	673.706	813.283	580.305	712.523	642.488	673.485	634.696	789.63	600.071	666.401	676.624	736.23
Ywhag	14-3-3 protein gamma OS=Mus musculus GN=Ywhag PE=1 SV=2	4.61	28473.7	14464	P61982	15	63.56	0	1433G_MOUSE	903.873	1401.48	339.562	391.004	619.477	766.869	966.543	903.651	246.749	383.357	555.808	581.865	671.686	730.857
Ap2a2	AP-2 complex subunit alpha-2 OS=Mus musculus GN=Ap2a2 PE=1 SV=2	6.5	104929	1403.26	P17427	33	48.4	0.0024	AP2A2_MOUSE	737.596	930.141	572.54	647.305	625.069	732.56	599.248	786.449	467.207	607.694	575.651	653.513	661.248	719.499
Fscn1	Fascin OS=Mus musculus GN=Fscn1 PE=1 SV=4	6.45	55249.4	4123.39	Q61553	26	73.23	0	FSCN1_MOUSE	547.899	591.033	802.217	1042.54	641.518	736.874	418.566	569.292	633.694	741.822	595.032	600.864	660.113	718.264
Cfh	Complement factor H OS=Mus musculus GN=Cfh PE=1 SV=2	6.6	143814	579.074	P06909	31	40.52	0.0024	CFAH_MOUSE	651.885	627.89	731.987	805.476	654.502	698.255	624.346	593.317	654.653	720.362	551.834	565.622	656.677	714.526
Cadm3	Cell adhesion molecule 3 OS=Mus musculus GN=Cadm3 PE=1 SV=1	5.4	43363.6	2980.07	Q99N28	12	48.99	0	CADM3_MOUSE	680.726	694.921	512.192	609.007	686.77	659.522	700.108	656.521	492.762	655.074	742.154	702.913	649.389	706.596
Akap12	A-kinase anchor protein 12 OS=Mus musculus GN=Akap12 PE=1 SV=1	4.19	181265	483.942	Q9WTQ5	22	21.2	0.0024	AKA12_MOUSE	901.247	832.963	470.716	523.767	610.409	592.261	859.064	832.888	456.977	491.659	609.788	562.734	645.373	702.226
Pdia3	Protein disulfide-isomerase A3 OS=Mus musculus GN=Pdia3 PE=1 SV=2	5.81	57134.7	3479.96	P27773	22	53.66	0	PDIA3_MOUSE	575.199	533.161	602.305	725.155	703.048	621.756	564.987	559.747	626.579	764.45	708.28	680.021	638.724	694.991
Hspd1	60 kDa heat shock protein, mitochondrial OS=Mus musculus GN=Hspd1 PE=1 SV=1	5.8	61126.7	2699.55	P63038	27	71.55	0	CH60_MOUSE	634.034	676.401	645.354	671.586	757.245	736.004	442.649	657.078	529.842	517.489	560.962	796.229	635.406	691.381
Ugt8	2-hydroxyacylsphingosine 1-beta-galactosyltransferase OS=Mus musculus GN=Ugt8 PE=2 SV=2	9.66	61477.5	1000.79	Q64676	13	35.86	0.0024	CGT_MOUSE	824.512	685.673	433.191	459.908	723.834	748.822	704.578	635.471	449.273	461.617	749.899	735.809	634.382	690.267
Sept7	Septin-7 OS=Mus musculus GN=Sept7 PE=1 SV=1	8.77	50892.1	4343.37	O55131	15	48.17	0	SEPT7_MOUSE	700.57	621.823	497.276	584.95	667.896	616.314	725.876	632.898	521.323	638.347	701.342	683.368	632.665	688.399
Prelp	Prolargin OS=Mus musculus GN=Prelp PE=1 SV=2	9.84	43634.7	5691	Q9JK53	14	39.95	0	PRELP_MOUSE	634.997	602.816	585.915	683.286	690.967	629.167	547.181	545.439	590.07	758.005	626.662	683.583	631.507	687.139
Pdcd6ip	Programmed cell death 6-interacting protein OS=Mus musculus GN=Pdcd6ip PE=1 SV=3	6.1	96594.6	1519.19	Q9WU78	32	48.33	0.0024	PDC6I_MOUSE	513.799	543.369	711.608	865.392	610.015	622.651	540.503	600.595	637.192	699.504	552.435	655.936	629.417	684.864
Hspa5	78 kDa glucose-regulated protein OS=Mus musculus GN=Hspa5 PE=1 SV=3	4.87	72536.2	4129.74	P20029	19	37.25	0	GRP78_MOUSE	723.51	621.81	604.176	562.332	676.857	652.557	625.339	611.878	580.763	586.418	638.305	649.759	627.809	683.114
Entpd2	Ectonucleoside triphosphate diphosphohydrolase 2 OS=Mus musculus GN=Entpd2 PE=1 SV=2	8.33	54946.8	2372.16	O55026	11	35.35	0	ENTP2_MOUSE	809.979	1045.35	416.752	450.47	654.716	618.332	727.449	687.503	386.097	480.382	617.997	600.441	624.623	679.648
Myh14	Myosin-14 OS=Mus musculus GN=Myh14 PE=1 SV=1	5.32	229498	700.174	Q6URW6	38	24.35	0.0024	MYH14_MOUSE	655.149	586.096	549.184	634.201	711.499	679.683	617.048	568.226	490.766	588.284	687.196	704.563	622.658	677.51
Ckb	Creatine kinase B-type OS=Mus musculus GN=Ckb PE=1 SV=1	5.29	42998.5	5967.29	Q04447	13	58.53	0	KCRB_MOUSE	839.297	749.934	477.11	572.472	639.887	516.858	734.389	800.61	456.581	467.462	550.176	664.237	622.418	677.248
Ehd3	EH domain-containing protein 3 OS=Mus musculus GN=Ehd3 PE=1 SV=2	6	60878.2	1451.29	Q9QXY6	13	34.77	0.0024	EHD3_MOUSE	421.972	358.613	1950.93	504.689	286.557	232.701	383.1	344	1909.83	551.276	271.712	249.375	622.063	676.863
Dag1	Dystroglycan OS=Mus musculus GN=Dag1 PE=1 SV=4	8.58	97247	424.668	Q62165	9	14.33	0.0024	DAG1_MOUSE	694.825	602.771	455.904	534.615	538.921	474.879	763.92	758.537	587.657	808.968	626.243	613.519	621.73	676.5
Lamb2	Laminin subunit beta-2 OS=Mus musculus GN=Lamb2 PE=2 SV=2	6.21	203708	258.038	Q61292	13	10.45	0.003	LAMB2_MOUSE	553.166	501.38	454.168	743.262	638.37	602.035	611.989	600.612	644.455	784.174	595.276	629.271	613.18	667.197
Nsf	Vesicle-fusing ATPase OS=Mus musculus GN=Nsf PE=1 SV=2	6.52	83183.9	1330.24	P46460	24	40.59	0.0024	NSF_MOUSE	751.097	832.685	576.459	585.182	554.123	635.893	729.921	643.89	456.565	538.003	502.857	523.684	610.863	664.676
Acaa2	3-ketoacyl-CoA thiolase, mitochondrial OS=Mus musculus GN=Acaa2 PE=1 SV=3	8.07	42286.2	5803.76	Q8BWT1	19	78.59	0	THIM_MOUSE	449.135	396.89	613.599	692.362	720.81	746.881	444.312	397.63	625.325	738.715	748.264	748.691	610.218	663.974
Rpn1	Dolichyl-diphosphooligosaccharide--protein glycosyltransferase subunit 1 OS=Mus musculus GN=Rpn1 PE=1 SV=1	6	68699.5	1720.84	Q91YQ5	25	55.76	0.0024	RPN1_MOUSE	615.838	724.728	451.646	484.45	654.44	699.357	612.052	752.686	445.838	525.39	661.796	693.684	610.159	663.909
Mapt	Microtubule-associated protein tau OS=Mus musculus GN=Mapt PE=1 SV=3	6.32	76585.7	1261.64	P10637	19	44.07	0.0024	TAU_MOUSE	715.825	773.718	533.9	624.652	565.509	588.724	645.719	718.802	457.551	550.614	554.371	554.138	606.96	660.43
Cyb5r3	NADH-cytochrome b5 reductase 3 OS=Mus musculus GN=Cyb5r3 PE=1 SV=3	8.52	34355.8	9658.85	Q9DCN2	14	61.46	0	NB5R3_MOUSE	678.825	627.292	431.563	516.669	621.414	657.59	721.242	683.509	443.539	534.209	653.167	677.395	603.868	657.064
Dpysl5	Dihydropyrimidinase-related protein 5 OS=Mus musculus GN=Dpysl5 PE=1 SV=1	6.65	62086.8	2150.79	Q9EQF6	19	58.16	0	DPYL5_MOUSE	494.32	617.052	573.08	647.48	568.261	675.415	445.661	686.412	525.672	580.816	614.131	743.863	597.68	650.332
Adam10	Disintegrin and metalloproteinase domain-containing protein 10 OS=Mus musculus GN=Adam10 PE=1 SV=2	7.8	86021.2	786.369	O35598	11	22.96	0.0024	ADA10_MOUSE	632.61	683.474	496.391	537.809	689.753	691.409	588.217	608.94	381.573	535.037	619.173	686.736	595.927	648.424
Pfkm	ATP-dependent 6-phosphofructokinase, muscle type OS=Mus musculus GN=Pfkm PE=1 SV=3	7.9	86124.2	1454.1	P47857	24	44.87	0.0024	PFKAM_MOUSE	585.772	582.095	484.362	534.264	724.852	762.459	499.323	507.427	450.84	640.371	666.493	712.176	595.87	648.362
Hmgcs1	Hydroxymethylglutaryl-CoA synthase, cytoplasmic OS=Mus musculus GN=Hmgcs1 PE=1 SV=1	5.56	58196.4	773.236	Q8JZK9	11	32.88	0.0024	HMCS1_MOUSE	634.761	715.252	460.735	549.284	567.622	564.054	747.38	686.84	485.027	537.038	560.207	616.833	593.753	646.058
Mme	Neprilysin OS=Mus musculus GN=Mme PE=1 SV=3	5.46	86386.4	2146.88	Q61391	27	45.07	0	NEP_MOUSE	604.783	629.686	466.244	535.374	680.963	699.365	571.233	583.601	426.393	548.999	684.166	681.887	592.725	644.94
Capg	Macrophage-capping protein OS=Mus musculus GN=Capg PE=1 SV=2	6.81	39525.6	4304.66	P24452	8	35.23	0	CAPG_MOUSE	695.467	701.599	600.457	685.449	518.137	491.229	597.355	658.971	530.897	683.435	454.735	477.303	591.253	643.338
Ca3	Carbonic anhydrase 3 OS=Mus musculus GN=Ca3 PE=1 SV=3	6.99	29651.5	6653.91	P16015	15	84.23	0	CAH3_MOUSE	370.282	398.767	757.999	917.135	521.888	549.84	345.597	329.253	793.924	971.834	520.629	531.715	584.072	635.525
Dld	Dihydrolipoyl dehydrogenase, mitochondrial OS=Mus musculus GN=Dld PE=1 SV=2	7.81	54785.7	1621.99	O08749	14	41.26	0.0024	DLDH_MOUSE	613.25	550.711	506.567	582.97	592.085	602.201	617.667	561.239	502.828	670.821	602.275	602.309	583.744	635.167
Vdac2	Voltage-dependent anion-selective channel protein 2 OS=Mus musculus GN=Vdac2 PE=1 SV=2	7.37	32360.2	4088.24	Q60930	12	55.93	0	VDAC2_MOUSE	663.381	615.384	457.59	469.831	612.799	607.985	640.261	583.307	469.144	522.715	620.888	659.351	576.886	627.706
Sept2	Septin-2 OS=Mus musculus GN=Sept2 PE=1 SV=2	6.09	41753.7	4157.06	P42208	14	60.94	0	SEPT2_MOUSE	671.638	521.609	506.361	522.617	662.026	638.476	645.253	509.031	494.114	581.764	583.171	574.218	575.857	626.586
Ddost	Dolichyl-diphosphooligosaccharide--protein glycosyltransferase 48 kDa subunit OS=Mus musculus GN=Ddost PE=1 SV=2	5.42	49256.1	1583.14	O54734	12	47.85	0.0024	OST48_MOUSE	465.129	681.773	546.017	743.225	488.201	445.583	327.004	695.128	609.836	834.658	441.143	601.156	573.238	623.736
Hsp90aa1	Heat shock protein HSP 90-alpha OS=Mus musculus GN=Hsp90aa1 PE=1 SV=4	4.74	85187.2	4727.41	P07901	24	42.84	0	HS90A_MOUSE	834.263	736.94	336.48	355.829	565.948	617.402	805.582	743.724	315.785	364.69	567.244	598.041	570.161	620.388
Nes	Nestin OS=Mus musculus GN=Nes PE=1 SV=1	4.1	207752	257.62	Q6P5H2	8	5.9	0.003	NEST_MOUSE	442.486	462.008	569.955	571.217	709.09	708.352	419.529	378.38	512.626	587.189	711.222	763.019	569.589	619.766
Ppib	Peptidyl-prolyl cis-trans isomerase B OS=Mus musculus GN=Ppib PE=1 SV=2	10	23713.5	6754.01	P24369	13	57.87	0	PPIB_MOUSE	597.627	548.066	438.366	521.156	675.261	563.893	624.779	542.212	427.719	591.894	648.956	620.429	566.696	616.619
Ndufc2	NADH dehydrogenase [ubiquinone] 1 subunit C2 OS=Mus musculus GN=Ndufc2 PE=1 SV=1	9.5	14220.7	667.367	Q9CQ54	2	18.33	0.0024	NDUC2_MOUSE	86.5174	79.3071	71.5946	1389.29	89.5158	1153.9	1211.63	1154.27	78.4665	1310.89	81.8646	87.297	566.212	616.092
Prdx5	Peroxiredoxin-5, mitochondrial OS=Mus musculus GN=Prdx5 PE=1 SV=2	9.13	22239.7	11868	P99029	11	62.86	0	PRDX5_MOUSE	586.972	583.345	549.429	644.429	530.107	511.712	609.632	569.712	536.848	664.927	485.019	520.969	566.092	615.961
Hsd17b4	Peroxisomal multifunctional enzyme type 2 OS=Mus musculus GN=Hsd17b4 PE=1 SV=3	8.69	79995.2	1471.86	P51660	17	35.65	0.0024	DHB4_MOUSE	533.372	698.727	451.804	704.905	541.34	517.694	571.955	623.631	465.536	661.757	506.318	495.777	564.401	614.121
Cct2	T-complex protein 1 subunit beta OS=Mus musculus GN=Cct2 PE=1 SV=4	5.95	57819.5	1904.65	P80314	22	60.56	0	TCPB_MOUSE	548.696	601.765	524.664	550.648	636.137	613.092	532.577	606.226	407.98	534.273	583.971	632.684	564.393	614.112
Zc3hav1l	Zinc finger CCCH-type antiviral protein 1-like OS=Mus musculus GN=Zc3hav1l PE=2 SV=1	8.36	33800.5	307.293	Q8BFR1	2	7.09	0.003	ZCCHL_MOUSE	478.722	473.887	837.876	877.414	301.959	280.09	535.663	433.711	930.808	972.674	344.075	293.315	563.349	612.977
Tns3	Tensin-3 OS=Mus musculus GN=Tns3 PE=1 SV=1	6.18	157129	179.48	Q5SSZ5	2	2.92	0.003	TENS3_MOUSE	555.976	470.161	523.564	625.805	589.559	571.087	505.711	523.445	493.964	616.47	617.969	653.962	562.306	611.841
Wdr1	WD repeat-containing protein 1 OS=Mus musculus GN=Wdr1 PE=1 SV=3	6.11	67091.1	2717.98	O88342	18	47.52	0	WDR1_MOUSE	380.823	393.013	506.213	575.284	745.464	750.785	363.815	355.119	530.417	600.735	759.439	765.32	560.536	609.915
Myo1b	Unconventional myosin-Ib OS=Mus musculus GN=Myo1b PE=2 SV=3	9.53	129591	556.92	P46735	23	27.01	0.0024	MYO1B_MOUSE	471.43	534.743	613.496	541.445	548.14	502.113	559.636	501.383	567.201	704.694	526.429	596.906	555.635	604.582
Ica	Inhibitor of carbonic anhydrase OS=Mus musculus GN=Ica PE=1 SV=1	6.91	78761.8	1263.31	Q9DBD0	23	50.57	0.0024	ICA_MOUSE	516.206	509.063	616.193	774.568	416.033	455.78	453.425	485.007	669.502	813.466	451.521	496.951	554.81	603.684
Iqgap1	Ras GTPase-activating-like protein IQGAP1 OS=Mus musculus GN=Iqgap1 PE=1 SV=2	6.04	189541	471.444	Q9JKF1	22	18.77	0.0024	IQGA1_MOUSE	609.863	542.986	402.503	456.416	592.867	606.657	653.601	522.298	402.334	515.275	703.671	613.198	551.806	600.416
Slc25a5	ADP/ATP translocase 2 OS=Mus musculus GN=Slc25a5 PE=1 SV=3	10.03	33159.5	9541.22	P51881	17	54.36	0	ADT2_MOUSE	698.912	571.381	413.664	459.473	575.581	534.515	724.969	608.349	408.388	485.932	571.649	548.777	550.132	598.595
Kif5b	Kinesin-1 heavy chain OS=Mus musculus GN=Kif5b PE=1 SV=3	6.01	110293	1412.47	Q61768	35	49.74	0.0024	KINH_MOUSE	600.707	489.518	544.766	592.875	596.952	584.822	454.101	503.367	462.673	548.207	527.976	618.76	543.727	591.626
Itgb1	Integrin beta-1 OS=Mus musculus GN=Itgb1 PE=1 SV=1	5.57	91482	718	P09055	8	16.79	0.0024	ITB1_MOUSE	630.225	569.711	415.572	452.329	597.711	594.005	594.751	579.203	399.79	501.459	555.01	611.18	541.745	589.47
Gnb2	Guanine nucleotide-binding protein G(I)/G(S)/G(T) subunit beta-2 OS=Mus musculus GN=Gnb2 PE=1 SV=3	5.54	38072.5	12984.2	P62880	11	60	0	GBB2_MOUSE	601.355	559.011	415.373	454.225	595.615	581.85	582.81	581.506	405.63	470.753	593.722	649.904	540.979	588.636
Slc44a2	Choline transporter-like protein 2 OS=Mus musculus GN=Slc44a2 PE=1 SV=2	8.79	81592.8	709.951	Q8BY89	8	16.01	0.0024	CTL2_MOUSE	578.058	547.633	424.07	573.362	555.584	574.83	588.406	520.505	414.634	564.675	532.071	564.71	536.545	583.811
Mtco1	Cytochrome c oxidase subunit 1 OS=Mus musculus GN=Mtco1 PE=3 SV=2	6.21	56967.3	254.214	P00397	2	7.78	0.003	COX1_MOUSE	614.267	679.455	614.187	661.292	421.262	432.215	383.694	403.478	623.876	715.909	432.086	443.64	535.447	582.616
Rab12	Ras-related protein Rab-12 OS=Mus musculus GN=Rab12 PE=1 SV=3	8.51	27670.7	1582.87	P35283	2	9.05	0.0024	RAB12_MOUSE	731.711	461.496	529.598	689.594	540.178	372.688	389.086	365.129	461.463	957.006	432.474	494.74	535.43	582.598
Ahsg	Alpha-2-HS-glycoprotein OS=Mus musculus GN=Ahsg PE=1 SV=1	6.04	38124	2027.39	P29699	7	35.65	0	FETUA_MOUSE	920.007	1207.34	409.303	359.197	443.597	445.456	384.573	1060.45	271.92	199.079	236.029	459.477	533.036	579.993
Nfasc	Neurofascin OS=Mus musculus GN=Nfasc PE=1 SV=1	5.77	138774	177.504	Q810U3	2	2.58	0.003	NFASC_MOUSE	611.468	534.484	385.844	528.311	569.016	572.802	582.895	486.842	442.231	505.273	572.779	582.676	531.218	578.015
Ywhaq	14-3-3 protein theta OS=Mus musculus GN=Ywhaq PE=1 SV=1	4.49	28063.5	12984.3	P68254	13	53.88	0	1433T_MOUSE	868.274	791.264	264.329	296.477	484.557	460.057	802.393	821.131	251.502	342.844	491.846	485.633	530.025	576.717
Slc25a12	Calcium-binding mitochondrial carrier protein Aralar1 OS=Mus musculus GN=Slc25a12 PE=1 SV=1	8.29	74968.9	1389.95	Q8BH59	24	54.36	0.0024	CMC1_MOUSE	561.584	729.221	479.781	516.762	462.65	418.596	574.83	566.608	491.127	579.844	482.696	467.151	527.571	574.046
Kpnb1	Importin subunit beta-1 OS=Mus musculus GN=Kpnb1 PE=1 SV=2	4.49	98438.9	571.813	P70168	15	24.43	0.0024	IMB1_MOUSE	691.736	640.772	342.151	454.624	552.856	460.868	631.346	696.426	369.937	350.502	478.176	595.331	522.06	568.05
Atp2a2	Sarcoplasmic/endoplasmic reticulum calcium ATPase 2 OS=Mus musculus GN=Atp2a2 PE=1 SV=2	5.05	116512	1229.76	O55143	24	28.74	0.0024	AT2A2_MOUSE	505.17	495.291	323.677	437.362	695.533	672.884	472.849	448.663	341.254	408.248	752.526	685.808	519.939	565.742
Pfn1	Profilin-1 OS=Mus musculus GN=Pfn1 PE=1 SV=2	8.48	15128.3	19680.8	P62962	9	72.86	0	PROF1_MOUSE	575.988	587.296	504.772	558.003	452.899	470.104	532.793	572.426	494.714	564.938	444.935	473.246	519.343	565.094
Stxbp6	Syntaxin-binding protein 6 OS=Mus musculus GN=Stxbp6 PE=2 SV=1	9.57	23956.2	6511.26	Q8R3T5	10	53.81	0	STXB6_MOUSE	478.787	488.014	499.886	622.348	523.068	511.243	478.153	465.92	498.228	610.181	541.191	512.768	519.149	564.882
Gnas	Guanine nucleotide-binding protein G(s) subunit alpha isoforms XLas OS=Mus musculus GN=Gnas PE=2 SV=1	4.52	122589	811.227	Q6R0H7	10	11.65	0.0024	GNAS1_MOUSE	439.489	577.045	559.272	541.861	513.395	506.591	435.913	660.46	459.732	420.907	434.441	671.282	518.366	564.03
Pls3	Plastin-3 OS=Mus musculus GN=Pls3 PE=1 SV=3	5.27	71255.3	522.333	Q99K51	9	18.57	0.0024	PLST_MOUSE	448.799	552.14	1247.51	944.823	247.791	274.548	442.191	526.806	393.099	609.608	251.329	263.394	516.836	562.366
Sbds	Ribosome maturation protein SBDS OS=Mus musculus GN=Sbds PE=1 SV=4	9.08	29065.7	797.564	P70122	9	44.4	0.0024	SBDS_MOUSE	673.484	598.702	121.953	858.418	491.969	390.19	649.706	545.083	118.308	859.983	463.586	410.772	515.179	560.563
Lum	Lumican OS=Mus musculus GN=Lum PE=1 SV=2	5.98	38664.2	5269.38	P51885	10	38.46	0	LUM_MOUSE	1055.81	925.695	222.962	244.615	286.045	275.824	951.076	1109.85	225.866	268.485	298.463	315.576	515.022	560.392
Map6	Microtubule-associated protein 6 OS=Mus musculus GN=Map6 PE=1 SV=2	9.92	96735	876.598	Q7TSJ2	20	32.23	0.0024	MAP6_MOUSE	696.296	677.516	498.117	587.778	492.103	509.204	462.517	511.273	395.481	470.012	374.461	503.648	514.867	560.223
Ap1b1	AP-1 complex subunit beta-1 OS=Mus musculus GN=Ap1b1 PE=1 SV=2	4.85	104790	580.724	O35643	24	36.8	0.0024	AP1B1_MOUSE	699.265	560.428	458.042	568.998	507.182	414.523	443.073	675.001	458.04	405.625	404.001	549.774	511.996	557.099
Stxbp1	Syntaxin-binding protein 1 OS=Mus musculus GN=Stxbp1 PE=1 SV=2	6.51	67968	2464.52	O08599	25	60.94	0	STXB1_MOUSE	556.381	710.302	325.763	506.059	506.051	539.824	509.949	592.166	321.137	524.265	513.941	523.936	510.814	555.814
Taldo1	Transaldolase OS=Mus musculus GN=Taldo1 PE=1 SV=2	6.64	37558.1	2741.58	Q93092	15	43.92	0	TALDO_MOUSE	599.748	550.064	463.14	568.756	517.288	541.002	583.042	573.898	398.265	453.706	429.284	442.454	510.054	554.986
Gnb2l1	Guanine nucleotide-binding protein subunit beta-2-like 1 OS=Mus musculus GN=Gnb2l1 PE=1 SV=3	7.56	35533	4646.03	P68040	15	70.35	0	GBLP_MOUSE	445.26	466.372	428.831	572.18	627.438	535.404	427.582	457.768	398.023	620.787	577.68	542.277	508.3	553.078
Ogn	Mimecan OS=Mus musculus GN=Ogn PE=2 SV=1	5.4	34354.3	4351.54	Q62000	10	40.27	0	MIME_MOUSE	651.632	1405.59	388.49	327.942	340.865	482.237	658.44	779.337	217.091	263.868	260.76	311.498	507.312	552.003
Cav1	Caveolin-1 OS=Mus musculus GN=Cav1 PE=1 SV=1	5.59	20709.8	8255	P49817	10	63.48	0	CAV1_MOUSE	614.593	690.422	289.623	392.12	563.548	560.712	626.485	642.929	252.606	397.469	497.927	540.33	505.73	550.282
Atp5f1	ATP synthase F(0) complex subunit B1, mitochondrial OS=Mus musculus GN=Atp5f1 PE=1 SV=1	9.39	29062.9	4050.04	Q9CQQ7	9	34.77	0	AT5F1_MOUSE	571.324	650.638	576.5	509.595	508.974	514.983	375.505	582.595	466.272	366.011	333.604	606.908	505.242	549.751
Aldh7a1	Alpha-aminoadipic semialdehyde dehydrogenase OS=Mus musculus GN=Aldh7a1 PE=1 SV=4	7.22	59374.8	2015.19	Q9DBF1	20	60.11	0	AL7A1_MOUSE	474.237	487.007	479.473	613.474	473.34	466.279	464.8	523.05	559.329	588.731	425.861	481.438	503.085	547.403
Rhoa	Transforming protein RhoA OS=Mus musculus GN=Rhoa PE=1 SV=1	5.73	22124.4	15901.8	Q9QUI0	10	72.54	0	RHOA_MOUSE	454.437	428.926	430.922	520.19	561.65	631.702	460.9	531.895	447.396	465.43	508.057	594.878	503.032	547.346
Hpcal1	Hippocalcin-like protein 1 OS=Mus musculus GN=Hpcal1 PE=2 SV=2	5.16	22452.3	1863.37	P62748	14	79.27	0	HPCL1_MOUSE	370.837	1010.92	404.077	669.053	232.158	250.488	374.015	1182.95	417.849	586.661	241.03	283.438	501.956	546.175
Atp6v1a	V-type proton ATPase catalytic subunit A OS=Mus musculus GN=Atp6v1a PE=1 SV=2	5.26	68668.4	1413.33	P50516	24	56.56	0.0024	VATA_MOUSE	597.157	531.976	421.878	482.347	489.314	494.874	579.268	537.503	391.172	499.547	482.57	491.309	499.91	543.948
Dnm1	Dynamin-1 OS=Mus musculus GN=Dnm1 PE=1 SV=2	7.64	98202.2	1327.82	P39053	28	41.18	0.0024	DYN1_MOUSE	474.256	552.642	458.805	530.346	505.422	539.845	422.471	551.33	412.037	472.752	472.357	541.38	494.47	538.03
Ckap4	Cytoskeleton-associated protein 4 OS=Mus musculus GN=Ckap4 PE=1 SV=2	5.32	63749.2	1917.83	Q8BMK4	21	47.3	0	CKAP4_MOUSE	592.806	510.088	316.163	366.773	573.466	559.821	549.866	519.619	337.112	387.832	595.498	583.729	491.064	534.324
Ndufs1	NADH-ubiquinone oxidoreductase 75 kDa subunit, mitochondrial OS=Mus musculus GN=Ndufs1 PE=1 SV=2	5.37	80803.5	1415.03	Q91VD9	27	49.66	0.0024	NDUS1_MOUSE	611.667	552.131	366.387	504.607	501.947	484.568	579.562	523.661	366.267	470.046	472.853	458.095	490.982	534.235
Copb1	Coatomer subunit beta OS=Mus musculus GN=Copb1 PE=1 SV=1	5.61	108207	789.096	Q9JIF7	23	37.25	0.0024	COPB_MOUSE	492.474	486.248	374.694	488.028	504.283	509.982	459.923	494.434	404.221	495.795	570.678	600.974	490.145	533.323
Sept11	Septin-11 OS=Mus musculus GN=Sept11 PE=1 SV=4	6.23	50036.9	2968.51	Q8C1B7	13	44.08	0	SEP11_MOUSE	518.623	489.764	518.069	537.387	461.562	466.066	450.215	498.443	454.033	544.114	474.326	463.181	489.649	532.783
Ap2b1	AP-2 complex subunit beta OS=Mus musculus GN=Ap2b1 PE=1 SV=1	5.05	105495	802.355	Q9DBG3	29	48.35	0.0024	AP2B1_MOUSE	497.208	615.601	266.552	317.833	548.027	575.794	486.511	744.801	293.636	379.454	392.538	745.151	488.592	531.634
Cmtm5	CKLF-like MARVEL transmembrane domain-containing protein 5 OS=Mus musculus GN=Cmtm5 PE=1 SV=1	4.55	17617.5	5306.71	Q9D6G9	5	36.54	0	CKLF5_MOUSE	438.079	427.38	681.382	525.657	474.744	481.375	419.836	403.35	624.734	518.964	416.355	450.464	488.527	531.563
Immt	MICOS complex subunit Mic60 OS=Mus musculus GN=Immt PE=1 SV=1	6.16	84299.4	1171.11	Q8CAQ8	29	47.82	0.0024	MIC60_MOUSE	546.989	551.338	414.066	492.116	521.994	502.562	519.511	515.94	376.56	481.463	459.268	478.835	488.387	531.411
Idh2	Isocitrate dehydrogenase [NADP], mitochondrial OS=Mus musculus GN=Idh2 PE=1 SV=3	8.85	51362.5	1678.9	P54071	18	46.24	0.0024	IDHP_MOUSE	367.691	310.142	394.507	549.006	623.99	565.885	391.182	429.99	396.654	534.372	603.054	608.295	481.231	523.624
Hagh	Hydroxyacylglutathione hydrolase, mitochondrial OS=Mus musculus GN=Hagh PE=1 SV=2	7.61	34540.4	956.156	Q99KB8	9	41.1	0.0024	GLO2_MOUSE	291.834	218.206	998.482	985.17	189.97	178.319	307.501	217.561	982.612	945.132	187.328	202.065	475.349	517.224
Vat1	Synaptic vesicle membrane protein VAT-1 homolog OS=Mus musculus GN=Vat1 PE=1 SV=3	5.92	43324.8	3200.22	Q62465	14	55.42	0	VAT1_MOUSE	531.907	494.475	353.809	456.684	473.039	469.022	577.934	581.326	352.046	459.149	458.748	451.023	471.597	513.141
Col18a1	Collagen alpha-1(XVIII) chain OS=Mus musculus GN=Col18a1 PE=1 SV=4	5.26	183198	237.561	P39061	4	3.95	0.003	COIA1_MOUSE	461.638	455.202	370.944	553.542	485.573	527.385	428.383	453.177	358.62	529.458	489.634	523.261	469.735	511.115
Bsg	Basigin OS=Mus musculus GN=Bsg PE=1 SV=2	5.46	42901	2085.72	P18572	9	27.25	0	BASI_MOUSE	572.182	528.52	335.267	387.672	489.219	500.657	542.227	511.299	371.017	396.795	493.653	505.329	469.486	510.845
Gnai2	Guanine nucleotide-binding protein G(i) subunit alpha-2 OS=Mus musculus GN=Gnai2 PE=1 SV=5	5.12	41059.3	5932.34	P08752	17	60.85	0	GNAI2_MOUSE	523.06	493.887	336.853	436.824	534.345	509.99	477.223	528.528	325.779	427.893	490.779	533.852	468.251	509.501
Pkp1	Plakophilin-1 OS=Mus musculus GN=Pkp1 PE=2 SV=1	8.97	82322	813.813	P97350	10	19.92	0.0024	PKP1_MOUSE		325.256	977.612	147.914				220.874	943.195	153.566			461.403	502.049
Kif5a	Kinesin heavy chain isoform 5A OS=Mus musculus GN=Kif5a PE=1 SV=3	5.57	117817	800.14	P33175	15	20.84	0.0024	KIF5A_MOUSE	364.875	368.975	886.793	355.768	394.214	399.384	369.327	345.678	927.37	369.648	379.497	373.717	461.271	501.905
Cct4	T-complex protein 1 subunit delta OS=Mus musculus GN=Cct4 PE=1 SV=3	8	58579.7	769.682	P80315	14	43.41	0.0024	TCPD_MOUSE	630.15	531.152	483.355	400.577	413.128	438.006	550.301	409.216	455.79	476.656	423.094	314.452	460.49	501.056
Dlat	Dihydrolipoyllysine-residue acetyltransferase component of pyruvate dehydrogenase complex, mitochondrial OS=Mus musculus GN=Dlat PE=1 SV=2	8.67	68512.1	845.303	Q8BMF4	19	40.03	0.0024	ODP2_MOUSE	406.652	385.759	310.081	1699.63	329.263	333.021	360.546	387.571	289.415	339.903	330.846	347.065	459.979	500.5
Copa	Coatomer subunit alpha OS=Mus musculus GN=Copa PE=1 SV=2	7.42	140086	628.59	Q8CIE6	27	33.66	0.0024	COPA_MOUSE	495.808	465.649	353.072	391.993	500.543	517.611	474.495	449.507	354.481	432.165	501.869	503.284	453.373	493.312
Capn2	Calpain-2 catalytic subunit OS=Mus musculus GN=Capn2 PE=2 SV=4	4.67	80727.7	1118.9	O08529	18	39.29	0.0024	CAN2_MOUSE	582.736	546.604	308.237	387.026	476.559	445.828	545.814	506.269	286.52	407.784	453.58	477.902	452.072	491.896
Ndufb10	NADH dehydrogenase [ubiquinone] 1 beta subcomplex subunit 10 OS=Mus musculus GN=Ndufb10 PE=1 SV=3	8.08	21309	1179.3	Q9DCS9	7	44.32	0.0024	NDUBA_MOUSE	310.528	213.812	1303.54	309.561	161.818	155.355	352.386	249.145	1427.79	434.508	242.809	256.468	451.477	491.25
Slc25a1	Tricarboxylate transport protein, mitochondrial OS=Mus musculus GN=Slc25a1 PE=2 SV=1	10.22	34273.7	2201.9	Q8JZU2	11	48.23	0	TXTP_MOUSE	466.478	448.226	405.917	452.174	435.312	423.128	473.556	482.677	383.841	472.729	474.924	478.458	449.785	489.408
Cct5	T-complex protein 1 subunit epsilon OS=Mus musculus GN=Cct5 PE=1 SV=1	5.63	60080.5	816.552	P80316	13	36.41	0.0024	TCPE_MOUSE	586.893	422.276	500.54	606.177	415.494	402.929	526.236	414.546	325.64	397.882	393.597	394.637	448.904	488.449
Mapk1	Mitogen-activated protein kinase 1 OS=Mus musculus GN=Mapk1 PE=1 SV=3	6.53	41674.9	2819.89	P63085	16	68.44	0	MK01_MOUSE	420.023	393.838	451.638	461.623	398.462	405.685	459.416	458.203	488.655	518.501	447.682	464.503	447.352	486.761
Ncam1	Neural cell adhesion molecule 1 OS=Mus musculus GN=Ncam1 PE=1 SV=3	4.54	120226	319.445	P13595	12	16.59	0.003	NCAM1_MOUSE	580.472	505.865	349.47	366.905	438.208	439.941	551.357	611.623	297.33	349.748	417.583	425.9	444.534	483.694
Pfkp	ATP-dependent 6-phosphofructokinase, platelet type OS=Mus musculus GN=Pfkp PE=1 SV=1	6.72	86481.7	1159.7	Q9WUA3	22	39.54	0.0024	PFKAP_MOUSE	480.525	442.203	403.928	431.752	482.92	437.371	441.877	442.92	366.797	454.062	478.268	469.784	444.367	483.513
Gstp1	Glutathione S-transferase P 1 OS=Mus musculus GN=Gstp1 PE=1 SV=2	7.96	23780.3	6596.88	P19157	8	61.9	0	GSTP1_MOUSE	526.871	448.611	387.229	438.912	413.02	425.759	504.683	450.369	418.108	460.174	435.818	418.981	444.045	483.162
Ckmt1	Creatine kinase U-type, mitochondrial OS=Mus musculus GN=Ckmt1 PE=1 SV=1	8.16	47403	2248.69	P30275	10	43.54	0	KCRU_MOUSE	516.84	585.414	448.535	435.78	362.981	391.863	459.005	579.796	369.805	395.548	346.017	424.316	442.992	482.016
Prnp	Major prion protein OS=Mus musculus GN=Prnp PE=1 SV=2	9.55	28148.6	4916.21	P04925	5	16.54	0	PRIO_MOUSE	305.919	270.759	1168.68	361.896	302.582	258.383	257.224	275.917	1146.52	322.834	322.458	322.671	442.987	482.011
Tjp1	Tight junction protein ZO-1 OS=Mus musculus GN=Tjp1 PE=1 SV=2	6.16	195141	297.558	P39447	8	8.42	0.003	ZO1_MOUSE	468.962	493.059	252.309	466.148	457.699	417.962	464.912	443.665	426.507	455.479	482.559	464.499	441.147	480.009
Acadl	Long-chain specific acyl-CoA dehydrogenase, mitochondrial OS=Mus musculus GN=Acadl PE=1 SV=2	8.35	48307.2	2991.23	P51174	12	35.58	0	ACADL_MOUSE	387.99	329.366	463.59	490.687	524.374	514.547	349.159	334.146	395.821	487.253	469.229	525.44	439.3	478
Hist1h4a	Histone H4 OS=Mus musculus GN=Hist1h4a PE=1 SV=2	11.77	11367.4	19767.2	P62806	7	58.25	0	H4_MOUSE	395.752	467.728	368.294	409.623	481.682	495.215	411.104	430.757	349.4	456.603	488.046	495.682	437.49	476.03
Stk39	STE20/SPS1-related proline-alanine-rich protein kinase OS=Mus musculus GN=Stk39 PE=1 SV=1	5.87	60833.2	1517.3	Q9Z1W9	15	45.68	0.0024	STK39_MOUSE	469.907	346.808	310.789	357.452	495.614	481.831	368.493	461.195	388.669	444.985	460.459	621.432	433.969	472.199
Ehd4	EH domain-containing protein 4 OS=Mus musculus GN=Ehd4 PE=1 SV=1	6.32	61708.8	1689.58	Q9EQP2	24	61.18	0.0024	EHD4_MOUSE	302.886	332.964	353.93	544.227	415.095	586.155	320.656	330.8	387.71	413.183	614.639	604.338	433.882	472.104
Crip2	Cysteine-rich protein 2 OS=Mus musculus GN=Crip2 PE=1 SV=1	8.62	23525.4	6482.65	Q9DCT8	7	67.79	0	CRIP2_MOUSE	331.329	323.105	670.439	586.403	376.156	388.263	321.751	345.5	466.82	603.25	410.506	375.066	433.216	471.379
Glud1	Glutamate dehydrogenase 1, mitochondrial OS=Mus musculus GN=Glud1 PE=1 SV=1	7.98	61679.1	1581.15	P26443	19	52.33	0.0024	DHE3_MOUSE	498.584	455.811	378.02	444.717	429.436	412.658	460.544	450.119	382.7	487.714	400.938	396.402	433.137	471.293
Actr3	Actin-related protein 3 OS=Mus musculus GN=Actr3 PE=1 SV=3	5.51	47813.4	2705.4	Q99JY9	14	46.41	0	ARP3_MOUSE	528.966	523.412	407.784	396.684	449.109	401.183	372.782	460.428	328.174	399.12	421.664	491.353	431.722	469.753
Acat2	Acetyl-CoA acetyltransferase, cytosolic OS=Mus musculus GN=Acat2 PE=1 SV=2	7.24	41754.1	2286.89	Q8CAY6	15	72.04	0	THIC_MOUSE	393.418	396.727	460.139	505.161	380.123	442.456	322.119	399.197	461.46	567.604	370.631	473.847	431.074	469.048
Limch1	LIM and calponin homology domains-containing protein 1 OS=Mus musculus GN=Limch1 PE=1 SV=2	5.21	119108	203.685	Q3UH68	4	4.73	0.003	LIMC1_MOUSE	457.634	674.267	536.766	600.257	189.87	188.895	336.113	551.395	311.793	763.192	195.356	360.605	430.512	468.437
Ddah1	N(G),N(G)-dimethylarginine dimethylaminohydrolase 1 OS=Mus musculus GN=Ddah1 PE=1 SV=3	5.56	31780.2	5072.61	Q9CWS0	17	76.84	0	DDAH1_MOUSE	424.67	439.152	448.909	469.649	397.408	464.605	417.45	390.813	397.05	482.718	418.505	393.213	428.678	466.442
Eml1	Echinoderm microtubule-associated protein-like 1 OS=Mus musculus GN=Eml1 PE=1 SV=1	6.56	90706.3	374.645	Q05BC3	11	22.11	0.0024	EMAL1_MOUSE	484.059	322.807	297.614	450.145	505.265	487.615	457.475	309.211	299.073	496.927	507.453	517.189	427.903	465.598
Gpd1l	Glycerol-3-phosphate dehydrogenase 1-like protein OS=Mus musculus GN=Gpd1l PE=1 SV=2	6.34	38852.9	483.221	Q3ULJ0	3	15.67	0.0024	GPD1L_MOUSE	424.591	311.994	523.91	559.165	475.12	391.578	346.969	366.556	309.871	505.243	325.091	592.694	427.732	465.412
Tagln	Transgelin OS=Mus musculus GN=Tagln PE=1 SV=3	9.22	22632.9	7937.92	P37804	13	68.16	0	TAGL_MOUSE	436.588	396.334	563.272	611.856	299.6	292.965	410.038	392.257	518.374	651.652	270.194	283.244	427.198	464.831
Atp4a	Potassium-transporting ATPase alpha chain 1 OS=Mus musculus GN=Atp4a PE=1 SV=3	5.51	115727	1511.38	Q64436	6	6.39	0.0024	ATP4A_MOUSE	519.567	474.704	339.811	415.848	368.816	445.887	484.251	458.69	327.572	398.239	443.948	439.149	426.373	463.934
Pdhb	Pyruvate dehydrogenase E1 component subunit beta, mitochondrial OS=Mus musculus GN=Pdhb PE=1 SV=1	6.44	39279.4	5123.14	Q9D051	13	56.82	0	ODPB_MOUSE	458.43	439.984	343.733	427.797	407.246	396.445	505.583	463.644	358.908	449.372	418.943	404.476	422.88	460.133
Dctn1	Dynactin subunit 1 OS=Mus musculus GN=Dctn1 PE=1 SV=3	5.55	142360	483.752	O08788	23	26	0.0024	DCTN1_MOUSE	444.58	436.032	301.584	426.133	466.779	487.43	421.476	437.194	260.56	430.517	441.543	483.674	419.792	456.773
Kit	Mast/stem cell growth factor receptor Kit OS=Mus musculus GN=Kit PE=1 SV=3	6.84	110598	225.002	P05532	2	3.88	0.003	KIT_MOUSE	366.039	302.408	587.831	536.42	369.456	345.51	293.623	252.169	603.94	632.9	347.081	359.738	416.426	453.111
Cnn3	Calponin-3 OS=Mus musculus GN=Cnn3 PE=1 SV=1	5.34	36599.9	5933.19	Q9DAW9	13	60.91	0	CNN3_MOUSE	426.575	411.787	328.875	373.453	474.333	464.822	421.748	401.623	341.066	385.517	463.645	496.866	415.859	452.493
Cycs	Cytochrome c, somatic OS=Mus musculus GN=Cycs PE=1 SV=2	10	11719.5	19068.3	P62897	7	56.19	0	CYC_MOUSE	406.284	420.348	384.637	439.151	405.912	398.978	431.018	394.085	430.588	459.544	405.302	412.879	415.727	452.35
Ywhab	14-3-3 protein beta/alpha OS=Mus musculus GN=Ywhab PE=1 SV=3	4.57	28200.5	11246	Q9CQV8	12	56.1	0	1433B_MOUSE	663.104	598.448	204.063	283.956	359.566	371.867	648.11	619.854	210.94	258.251	399.324	366.84	415.36	451.951
Cd47	Leukocyte surface antigen CD47 OS=Mus musculus GN=Cd47 PE=1 SV=2	8.7	33610.8	1675.44	Q61735	2	7.92	0.0024	CD47_MOUSE	461.646	342.719	352.391	370.968	415.203	343.111	311.525	344.636	654.439	311.159	697.499	344.988	412.524	448.864
Hspa9	Stress-70 protein, mitochondrial OS=Mus musculus GN=Hspa9 PE=1 SV=3	5.7	73746.5	1302.52	P38647	21	42.56	0.0024	GRP75_MOUSE	418.529	383.181	384.472	453.957	409.947	429.275	423.412	399.094	366.912	464.959	393.005	390.258	409.75	445.846
Dnm2	Dynamin-2 OS=Mus musculus GN=Dnm2 PE=1 SV=2	7.1	98487.6	628.419	P39054	18	24.02	0.0024	DYN2_MOUSE	433.094	477.286	439.61	443.773	314.177	359.045	434.718	400.688	395.564	503.409	296.158	351.137	404.055	439.649
Slc16a1	Monocarboxylate transporter 1 OS=Mus musculus GN=Slc16a1 PE=1 SV=1	7.37	53894.6	1397.38	P53986	7	19.68	0.0024	MOT1_MOUSE	438.163	436.802	301.736	325.041	446.31	499.008	432.908	441.459	279.735	345.512	438.862	446.425	402.663	438.135
Aldh6a1	Methylmalonate-semialdehyde dehydrogenase [acylating], mitochondrial OS=Mus musculus GN=Aldh6a1 PE=1 SV=1	8.06	58372	1823.35	Q9EQ20	13	47.1	0	MMSA_MOUSE	311.774	324.358	461.054	515.756	431.925	410.543	274.175	298.265	424.617	529.949	416.756	422.144	401.776	437.17
Ppp2r2a	Serine/threonine-protein phosphatase 2A 55 kDa regulatory subunit B alpha isoform OS=Mus musculus GN=Ppp2r2a PE=1 SV=1	5.76	52205.4	449.721	Q6P1F6	5	13.42	0.0024	2ABA_MOUSE	443.804	400.96	375.668	538.006	359.084	335.632	329.606	424.773	435.658	562.126	333.055	281.4	401.648	437.03
Atp1b3	Sodium/potassium-transporting ATPase subunit beta-3 OS=Mus musculus GN=Atp1b3 PE=1 SV=1	8.63	32117.9	2354.39	P97370	9	49.28	0	AT1B3_MOUSE	486.447	423.957	280.108	362.515	456.196	432.218	473.674	411.328	270.645	366.097	432.088	423.414	401.557	436.932
Rap1b	Ras-related protein Rap-1b OS=Mus musculus GN=Rap1b PE=2 SV=2	5.46	21052.9	14509.4	Q99JI6	11	72.83	0	RAP1B_MOUSE	441.613	432.033	346.596	416.233	487.035	471.69	331.085	413.63	297.266	310.949	390.897	473.536	401.047	436.376
Pcolce	Procollagen C-endopeptidase enhancer 1 OS=Mus musculus GN=Pcolce PE=1 SV=2	8.4	50852.4	1104.21	Q61398	9	27.14	0.0024	PCOC1_MOUSE	401.71	326.41	374.828	543.802	335.111	433.5	379.774	308.35	402.446	527.211	328.414	444.589	400.512	435.795
Slc2a1	Solute carrier family 2, facilitated glucose transporter member 1 OS=Mus musculus GN=Slc2a1 PE=1 SV=4	9.04	54326.9	442.885	P17809	4	8.74	0.0024	GTR1_MOUSE	484.408	415.406	289.01	353.179	410.023	374.007	543.617	440.815	307.93	334.234	415.57	419.715	398.993	434.141
Lamp1	Lysosome-associated membrane glycoprotein 1 OS=Mus musculus GN=Lamp1 PE=1 SV=2	8.43	44321.4	1098.19	P11438	6	19.46	0.0024	LAMP1_MOUSE	357.704	339.972	232.549	279.69	281.614	271.674	531.894	910.164	531.233	490.187	257.435	254.906	394.919	429.708
Capzb	F-actin-capping protein subunit beta OS=Mus musculus GN=Capzb PE=1 SV=3	5.34	31630.7	1335.27	P47757	10	49.1	0.0024	CAPZB_MOUSE	417.334	525.516	361.607	354.445	345.691	371.897	413.726	458.833	294.328	397.625	353.183	403.227	391.451	425.935
Tagln2	Transgelin-2 OS=Mus musculus GN=Tagln2 PE=1 SV=4	8.44	22566.6	6445.75	Q9WVA4	15	80.9	0	TAGL2_MOUSE	398.4	371.415	328.278	368.858	332.142	277.454	451.292	417.592	411.38	510.199	429.687	397.606	391.192	425.653
Mrc1	Macrophage mannose receptor 1 OS=Mus musculus GN=Mrc1 PE=1 SV=2	6.38	167947	233.466	Q61830	5	4.53	0.003	MRC1_MOUSE	381.817	496.615	336.843	403.62	334.22	342.189	395.743	398.902	340.467	521.566	347.268	348.565	387.318	421.438
Gpd1	Glycerol-3-phosphate dehydrogenase [NAD(+)], cytoplasmic OS=Mus musculus GN=Gpd1 PE=1 SV=3	6.8	38200.1	2668.64	P13707	21	74.21	0	GPDA_MOUSE	329.432	536.815	440.97	483.632	405.681	275.179	240.882	457.656	258.4	402.15	380.795	410.06	385.138	419.066
Islr	Immunoglobulin superfamily containing leucine-rich repeat protein OS=Mus musculus GN=Islr PE=1 SV=1	5.03	46356.4	559.237	Q6GU68	8	26.64	0.0024	ISLR_MOUSE	417.581	371.297	277.142	377.476	497.493	491.389	245.899	412.945	309.21	374.184	322.857	509.814	383.941	417.763
Rufy3	Protein RUFY3 OS=Mus musculus GN=Rufy3 PE=1 SV=1	5.2	53292.3	2748.84	Q9D394	20	51.81	0	RUFY3_MOUSE	378.255	313.113	429.252	430.238	346.79	389.706	303.515	317.604	463.713	447.332	333.604	431.547	382.056	415.712
Ugp2	UTP--glucose-1-phosphate uridylyltransferase OS=Mus musculus GN=Ugp2 PE=2 SV=3	7.44	57150.5	447.472	Q91ZJ5	10	26.18	0.0024	UGPA_MOUSE	441.017	398.534	423.827	420.036	523.607	266.307	297.049	295.008	442.224	376.292	425.448	266.172	381.293	414.883
Atp6v1b2	V-type proton ATPase subunit B, brain isoform OS=Mus musculus GN=Atp6v1b2 PE=1 SV=1	5.45	56893.1	1097.89	P62814	15	47.95	0.0024	VATB2_MOUSE	440.504	416.408	354.544	415.694	339.12	367.385	402.628	387.902	327.064	402.503	356.52	365.047	381.277	414.865
Idh3a	Isocitrate dehydrogenase [NAD] subunit alpha, mitochondrial OS=Mus musculus GN=Idh3a PE=1 SV=1	6.27	40095	2433	Q9D6R2	13	41.8	0	IDH3A_MOUSE	403.964	425.018	315.64	344.82	401.704	450.812	387.899	373.871	275.063	354.564	410.843	418.5	380.225	413.72
Gnaq	Guanine nucleotide-binding protein G(q) subunit alpha OS=Mus musculus GN=Gnaq PE=1 SV=4	5.34	42443.3	2867.72	P21279	17	59.05	0	GNAQ_MOUSE	427.356	352.239	355.88	343.904	389.262	352.163	408.031	348.352	381.646	381.532	399.114	406.946	378.869	412.245
Rab7a	Ras-related protein Rab-7a OS=Mus musculus GN=Rab7a PE=1 SV=2	6.57	23774.9	10510.8	P51150	14	76.33	0	RAB7A_MOUSE	405.988	415.056	266.479	308.189	465.181	413.016	430.465	393.443	254.404	330.492	435.384	426.304	378.7	412.061
Ctnna1	Catenin alpha-1 OS=Mus musculus GN=Ctnna1 PE=1 SV=1	5.83	100791	604.633	P26231	18	34.55	0.0024	CTNA1_MOUSE	446.254	403.926	358.522	335.58	421.108	365.96	302.801	434.826	335.793	265.643	339.621	479.987	374.168	407.13
Copg1	Coatomer subunit gamma-1 OS=Mus musculus GN=Copg1 PE=2 SV=1	5.07	98767.6	795.351	Q9QZE5	21	40.96	0.0024	COPG1_MOUSE	425.963	345.391	271.468	307.235	417.058	382.447	443.898	372.676	283.287	337.148	444.866	452.896	373.694	406.614
Osbpl1a	Oxysterol-binding protein-related protein 1 OS=Mus musculus GN=Osbpl1a PE=1 SV=2	5.99	109278	388.935	Q91XL9	8	13.68	0.0024	OSBL1_MOUSE	331.769	283.023	354.182	426.317	379.375	365.738	348.527	326.766	411.283	430.966	406.031	416.046	373.335	406.224
Bzw1	Basic leucine zipper and W2 domain-containing protein 1 OS=Mus musculus GN=Bzw1 PE=1 SV=1	5.61	48214.4	292.601	Q9CQC6	2	4.77	0.003	BZW1_MOUSE	309.578	386.78	548.955	598.032	290.79	281.269	282.457	375.952	302.72	598.816	234.662	261.748	372.647	405.474
Nnt	NAD(P) transhydrogenase, mitochondrial OS=Mus musculus GN=Nnt PE=1 SV=2	7.46	114523	403.353	Q61941	6	11.23	0.0024	NNTM_MOUSE	450.163	397.113	316.342	363.742	361.721	357.674	385.45	403.498	324.871	353.539	375.243	370.68	371.67	404.411
Rpn2	Dolichyl-diphosphooligosaccharide--protein glycosyltransferase subunit 2 OS=Mus musculus GN=Rpn2 PE=2 SV=1	5.44	69177.1	720.034	Q9DBG6	15	38.99	0.0024	RPN2_MOUSE	424.951	427.375	286.796	313.594	405.338	417.739	375.398	421.016	288.458	299.518	403.539	391.95	371.306	404.016
Tubal3	Tubulin alpha chain-like 3 OS=Mus musculus GN=Tubal3 PE=2 SV=2	5.24	50729.6	1500.33	Q3UX10	3	7.4	0.0024	TBAL3_MOUSE	460.04	430.851	241.776	258.625	384.733	386.511	494.798	489.388	240.635	288.2	378.956	378.811	369.444	401.989
Nid2	Nidogen-2 OS=Mus musculus GN=Nid2 PE=1 SV=2	5.02	156707	285.485	O88322	6	7.77	0.003	NID2_MOUSE	398.185	341.885	312.134	345.692	380.422	352.826	415.304	375.687	339.977	354.342	404.053	408.104	369.051	401.562
Ctnnb1	Catenin beta-1 OS=Mus musculus GN=Ctnnb1 PE=1 SV=1	5.45	86098.1	1384.33	Q02248	21	38.67	0.0024	CTNB1_MOUSE	370.592	337.783	502.418	318.051	384.688	376.59	320.901	330.06	428.978	295.594	337.279	407.617	367.546	399.924
Rpl21	60S ribosomal protein L21 OS=Mus musculus GN=Rpl21 PE=2 SV=3	10.91	18618.9	842.215	O09167	3	25	0.0024	RL21_MOUSE	96.8909	139.888	1717.12	153.779	68.8269	61.7696	80.324	145.304	1462.39	244.57	84.1071	111.854	363.902	395.96
Hadh	Hydroxyacyl-coenzyme A dehydrogenase, mitochondrial OS=Mus musculus GN=Hadh PE=1 SV=2	9	34635	2695.93	Q61425	10	61.46	0	HCDH_MOUSE	282.866	461.922	462.333	392.143	370.197	427.414	255.007	288.423	319.94	366.025	332.527	370.965	360.813	392.598
Vps35	Vacuolar protein sorting-associated protein 35 OS=Mus musculus GN=Vps35 PE=1 SV=1	5.13	92511.5	564.156	Q9EQH3	11	18.34	0.0024	VPS35_MOUSE	427.536	384.488	268.846	336.477	417.339	345.044	446.743	368.833	230.261	311.721	411.109	377.507	360.492	392.249
Pygm	Glycogen phosphorylase, muscle form OS=Mus musculus GN=Pygm PE=1 SV=3	6.67	97742.7	1043.11	Q9WUB3	30	40.74	0.0024	PYGM_MOUSE	130.213	119.314	260.703	283.907	679.427	713.055	124.78	109.726	257.517	294.985	648.408	680.255	358.524	390.108
Nme1	Nucleoside diphosphate kinase A OS=Mus musculus GN=Nme1 PE=1 SV=1	7.26	17321.9	12989.7	P15532	15	86.18	0	NDKA_MOUSE	382.819	412.002	340.429	388.253	326.569	339.253	386.778	406.593	319.581	376.448	297.208	324.171	358.342	389.909
Susd2	Sushi domain-containing protein 2 OS=Mus musculus GN=Susd2 PE=1 SV=1	6.16	92238.4	417.513	Q9DBX3	8	14.88	0.0024	SUSD2_MOUSE	410.688	400.679	340.358	352.534	332.006	327.474	391.156	396.361	351.079	374.449	314.534	305.113	358.036	389.576
Rpl4	60S ribosomal protein L4 OS=Mus musculus GN=Rpl4 PE=1 SV=3	11.44	47438.9	1266.09	Q9D8E6	10	31.98	0.0024	RL4_MOUSE	374.871	364.601	237.763	324.005	409.935	386.029	377.198	428.383	274.978	277.275	447.654	348.483	354.265	385.473
Aspn	Asporin OS=Mus musculus GN=Aspn PE=1 SV=1	8.71	42971.8	1560.54	Q99MQ4	8	35.66	0.0024	ASPN_MOUSE	381.214	343.23	328.013	337.885	368.114	359.007	361.04	354.405	307.334	368.935	368.253	364.43	353.488	384.628
Plcd1	1-phosphatidylinositol 4,5-bisphosphate phosphodiesterase delta-1 OS=Mus musculus GN=Plcd1 PE=2 SV=2	5.77	86671.7	1015.7	Q8R3B1	20	44.58	0.0024	PLCD1_MOUSE	369.872	355.358	310.353	360.48	352.427	348.471	374.271	325.972	299.636	383.234	368.315	369.179	351.464	382.425
Acadvl	Very long-chain specific acyl-CoA dehydrogenase, mitochondrial OS=Mus musculus GN=Acadvl PE=1 SV=3	8.97	71274.8	926.35	P50544	19	42.99	0.0024	ACADV_MOUSE	247.225	231.182	402.685	448.739	371.387	338.353	238.886	228.976	410.891	516.056	389.328	383.108	350.568	381.451
Ube2d1	Ubiquitin-conjugating enzyme E2 D1 OS=Mus musculus GN=Ube2d1 PE=2 SV=1	7.21	16830.2	1208.05	P61080	4	42.86	0.0024	UB2D1_MOUSE	199.383	146.622	1356.41	210.554	104.862	103.804	104.251	218.163	1277.39	288.077	94.1928	101.251	350.413	381.282
Oxct1	Succinyl-CoA:3-ketoacid coenzyme A transferase 1, mitochondrial OS=Mus musculus GN=Oxct1 PE=1 SV=1	8.68	56387.9	829.133	Q9D0K2	13	39.42	0.0024	SCOT1_MOUSE	335.263	317.575	400.812	443.563	336.413	303.599	280.486	307.206	382.73	467.191	324.633	305.29	350.397	381.264
Flot1	Flotillin-1 OS=Mus musculus GN=Flot1 PE=1 SV=1	6.78	47798.7	916.899	O08917	20	57.24	0.0024	FLOT1_MOUSE	393.648	360.495	265.353	307.541	405.184	419.076	336.084	371.039	251.104	271.78	401.433	402.114	348.737	379.459
Pgam2	Phosphoglycerate mutase 2 OS=Mus musculus GN=Pgam2 PE=2 SV=3	8.77	28998.2	4745.63	O70250	14	65.61	0	PGAM2_MOUSE	226.356	237.573	354.043	392.217	481.701	508.467	219.047	232.938	335.135	385.355	359.08	435.371	347.274	377.866
Pacsin1	Protein kinase C and casein kinase substrate in neurons protein 1 OS=Mus musculus GN=Pacsin1 PE=1 SV=1	4.97	50917.5	782.907	Q61644	11	31.75	0.0024	PACN1_MOUSE	338.176	341.576	301.24	349.644	393.627	424.762	323.179	305.183	288.582	374.65	341.192	372.583	346.199	376.697
Cd151	CD151 antigen OS=Mus musculus GN=Cd151 PE=2 SV=2	7.3	29101.6	1686.55	O35566	3	12.65	0.0024	CD151_MOUSE	285.658	247.253	633.886	357.024	234.252	304.47	265.335	268.666	619.036	339.495	305.511	291.266	345.988	376.467
Sept9	Septin-9 OS=Mus musculus GN=Sept9 PE=1 SV=1	9.19	65917.2	1041.94	Q80UG5	14	29.16	0.0024	SEPT9_MOUSE	350.925	326.423	283.803	365.303	377.903	368.432	364.387	322.63	287.861	344.448	386.537	363.998	345.221	375.632
Stip1	Stress-induced-phosphoprotein 1 OS=Mus musculus GN=Stip1 PE=1 SV=1	6.39	63209.5	1417.77	Q60864	15	34.25	0.0024	STIP1_MOUSE	417.826	368.897	300.474	297.709	337.595	363.194	372.339	369.553	279.124	346.029	340.117	329.677	343.544	373.808
Sept8	Septin-8 OS=Mus musculus GN=Sept8 PE=1 SV=4	5.6	50154.6	1577.65	Q8CHH9	13	45.45	0.0024	SEPT8_MOUSE	355.109	332.191	355.263	391.894	324.466	344.213	305.824	323.926	320.867	396.166	319.872	348.567	343.196	373.43
Bcam	Basal cell adhesion molecule OS=Mus musculus GN=Bcam PE=2 SV=1	5.81	68468.6	1142.34	Q9R069	20	52.73	0.0024	BCAM_MOUSE	392.587	373.244	275.348	301.307	356.687	310.68	422.235	377.165	246.431	310.377	371.787	359.106	341.413	371.489
Gnao1	Guanine nucleotide-binding protein G(o) subunit alpha OS=Mus musculus GN=Gnao1 PE=1 SV=3	5.19	40654.9	1378.51	P18872	13	49.72	0.0024	GNAO_MOUSE	421.159	419.654	202.269	299.602	364.903	369.18	408.93	367.257	194.966	295.306	375.103	336.194	337.877	367.642
Cdc42	Cell division control protein 42 homolog OS=Mus musculus GN=Cdc42 PE=1 SV=2	6.15	21600.8	7029.13	P60766	10	62.83	0	CDC42_MOUSE	277.015	346.53	314.907	364.337	447.221	465.885	265.814	307.869	251.612	278.131	360.897	370.878	337.591	367.331
Mcam	Cell surface glycoprotein MUC18 OS=Mus musculus GN=Mcam PE=1 SV=1	5.48	72515	647.668	Q8R2Y2	9	18.52	0.0024	MUC18_MOUSE	360.877	385.677	229.048	271.407	368.86	358.466	384.289	353.5	246.129	304.473	391.144	395.806	337.473	367.202
Ldhb	L-lactate dehydrogenase B chain OS=Mus musculus GN=Ldhb PE=1 SV=2	5.63	36857.5	3445.12	P16125	11	43.11	0	LDHB_MOUSE	367.672	370.676	276.37	343.257	356.212	319.028	360.86	344.944	251.917	363.324	328.217	337.365	334.987	364.497
Sorbs1	Sorbin and SH3 domain-containing protein 1 OS=Mus musculus GN=Sorbs1 PE=1 SV=2	8.21	144040	261.304	Q62417	6	7.6	0.003	SRBS1_MOUSE	335.486	335.955	327.397	376.024	301.648	305.435	357.962	334.189	296.02	416.972	307.081	318.801	334.414	363.874
Capn1	Calpain-1 catalytic subunit OS=Mus musculus GN=Capn1 PE=1 SV=1	5.5	82790.8	399.656	O35350	11	19.78	0.0024	CAN1_MOUSE	323.848	253.261	322.616	345.443	366.67	322.186	329.155	309.596	317.048	388.78	370.205	344.118	332.744	362.056
Fhl1	Four and a half LIM domains protein 1 OS=Mus musculus GN=Fhl1 PE=1 SV=3	8.26	33827.7	3135.21	P97447	12	56.43	0	FHL1_MOUSE	327.897	342.94	288.834	318.093	368.051	385.767	299.961	338.874	274.889	313.466	351.04	349.635	329.954	359.021
Rpl7	60S ribosomal protein L7 OS=Mus musculus GN=Rpl7 PE=1 SV=2	11.32	31476.7	2660.42	P14148	12	46.3	0	RL7_MOUSE	316.669	410.418	303.016	303.741	351.104	442.579	255.358	355.382	268.247	206.361	287.957	445.47	328.858	357.829
Idi1	Isopentenyl-diphosphate Delta-isomerase 1 OS=Mus musculus GN=Idi1 PE=2 SV=1	5.74	26631.3	1882.97	P58044	9	54.19	0	IDI1_MOUSE	367.728	371.587	277.587	322.976	288.734	275.174	366.983	337.928	320.764	386.679	314.649	301.026	327.651	356.515
Atp1a4	Sodium/potassium-transporting ATPase subunit alpha-4 OS=Mus musculus GN=Atp1a4 PE=1 SV=3	5.37	116085	3714.65	Q9WV27	10	10.08	0	AT1A4_MOUSE	375.976	369.457	255.844	292.313	358.895	346.234	364.524	357.486	247.566	295.947	329.052	335.068	327.363	356.202
Ces1d	Carboxylesterase 1D OS=Mus musculus GN=Ces1d PE=1 SV=1	6.16	62073	612.237	Q8VCT4	13	32.74	0.0024	CES1D_MOUSE	245.798	220.044	485.556	544.606	168.269	161.214	328.466	226.006	501.176	607.26	225.943	175.566	324.159	352.715
Pdha1	Pyruvate dehydrogenase E1 component subunit alpha, somatic form, mitochondrial OS=Mus musculus GN=Pdha1 PE=1 SV=1	8.14	43916.1	1450.25	P35486	13	39.23	0.0024	ODPA_MOUSE	373.006	332.991	353.372	401.956	252.452	248.313	338.453	324.837	363.58	455.333	230.356	212.389	323.92	352.455
Glul	Glutamine synthetase OS=Mus musculus GN=Glul PE=1 SV=6	6.66	42861.1	2140.37	P15105	11	51.74	0	GLNA_MOUSE	393.12	376.809	315.099	395.586	237.604	232.761	352.483	343.8	279.576	377.637	306.814	258.036	322.444	350.849
Tgm3	Protein-glutamine gamma-glutamyltransferase E OS=Mus musculus GN=Tgm3 PE=1 SV=2	6.37	77765.7	272.416	Q08189	2	4.47	0.003	TGM3_MOUSE			432.084						208.09				320.087	348.285
Cp	Ceruloplasmin OS=Mus musculus GN=Cp PE=1 SV=2	5.44	121950	314.308	Q61147	8	12.06	0.003	CERU_MOUSE	398.878	356.045	256.617	269.018	311.573	263.507	431.896	355.091	241.892	301.618	317.947	331.05	319.594	347.748
Rps27a	Ubiquitin-40S ribosomal protein S27a OS=Mus musculus GN=Rps27a PE=1 SV=2	10.03	18293.1	7187.07	P62983	5	42.31	0	RS27A_MOUSE	364.21	304.879	265.342	279.031	334.203	317.061	396.737	340.634	280.747	293.398	317.178	328.687	318.509	346.567
Acat1	Acetyl-CoA acetyltransferase, mitochondrial OS=Mus musculus GN=Acat1 PE=1 SV=1	8.65	45158.4	2016.85	Q8QZT1	14	53.3	0	THIL_MOUSE	282.774	268.525	304.498	339.563	351.137	323.455	262.683	263.623	339.657	376.865	358.352	349.94	318.423	346.474
Anxa5	Annexin A5 OS=Mus musculus GN=Anxa5 PE=1 SV=1	4.62	35809.5	2309.21	P48036	12	45.45	0	ANXA5_MOUSE	385.112	342.296	279.598	328.438	291.3	257.502	370.648	350.14	316.982	340.347	266.61	286.382	317.946	345.955
Ezr	Ezrin OS=Mus musculus GN=Ezr PE=1 SV=3	5.73	69521	3168.76	P26040	19	36.69	0	EZRI_MOUSE	350.42	398.556	343.54	358.51	308.649	355.871	277.08	313.915	265.895	249.23	241.315	329.566	316.046	343.887
F13a1	Coagulation factor XIII A chain OS=Mus musculus GN=F13a1 PE=2 SV=3	5.52	83720.7	406.373	Q8BH61	13	26.09	0.0024	F13A_MOUSE	305.94	278.45	336.938	424.579	329.504	304.385	284.716	268.207	318.733	342.794	289.096	306.943	315.857	343.682
Txndc5	Thioredoxin domain-containing protein 5 OS=Mus musculus GN=Txndc5 PE=1 SV=2	5.41	47099.9	489.251	Q91W90	3	11.99	0.0024	TXND5_MOUSE	362.318		362.007	997.094	99.3356	127.242	297.078	248.769	225.488	449.843	179.398	103.552	313.83	341.476
Hist1h1e	Histone H1.4 OS=Mus musculus GN=Hist1h1e PE=1 SV=2	11.59	21977.3	2061.67	P43274	3	14.61	0	H14_MOUSE	269.231	254.545	246.544	293.42	421.386	409.49	271.284	263.258	238.753	295.978	396.667	395.177	312.978	340.549
Esyt1	Extended synaptotagmin-1 OS=Mus musculus GN=Esyt1 PE=1 SV=2	5.55	121782	405.792	Q3U7R1	12	13.37	0.0024	ESYT1_MOUSE	433.765	320.717	254.566	294.813	314.212	311.649	376.685	278.03	234.656	283.688	342.299	284.883	310.83	338.212
Ap2m1	AP-2 complex subunit mu OS=Mus musculus GN=Ap2m1 PE=1 SV=1	9.88	49996.9	1183.89	P84091	15	37.7	0.0024	AP2M1_MOUSE	403.582	319.302	240.489	395.456	264.823	291.514	252.735	266.009	356.379	415.19	252.834	253.372	309.307	336.555
Endod1	Endonuclease domain-containing 1 protein OS=Mus musculus GN=Endod1 PE=1 SV=2	5.74	55946.6	916.721	Q8C522	7	21.16	0.0024	ENDD1_MOUSE	401.428	356.789	223.444	264.146	294.776	310.659	362.046	387.424	218.673	279.661	300.274	309.626	309.079	336.307
Aldh1a1	Retinal dehydrogenase 1 OS=Mus musculus GN=Aldh1a1 PE=1 SV=5	7.7	55095.2	2058.27	P24549	18	45.91	0	AL1A1_MOUSE	282.295	316.762	391.483	424.961	219.394	215.535	274.082	314.913	356.699	452.476	223.35	220.253	307.683	334.788
Etfa	Electron transfer flavoprotein subunit alpha, mitochondrial OS=Mus musculus GN=Etfa PE=1 SV=2	8.49	35351.6	3633.94	Q99LC5	15	63.36	0	ETFA_MOUSE	226.415	201.742	380.778	420.623	316.882	308.117	203.37	194.345	373.917	478.073	264.149	319.713	307.344	334.419
Cox4i1	Cytochrome c oxidase subunit 4 isoform 1, mitochondrial OS=Mus musculus GN=Cox4i1 PE=1 SV=2	9.59	19587.5	5705.16	P19783	8	48.52	0	COX41_MOUSE	329.656	280.233	263.507	300.212	349.004	331.583	319.633	295.249	269.932	308.34	303.031	335.507	307.157	334.216
Ywhah	14-3-3 protein eta OS=Mus musculus GN=Ywhah PE=1 SV=2	4.61	28382.9	9128.28	P68510	14	61.38	0	1433F_MOUSE	482.304	487.701	187.485	185.652	286.769	276.869	428.482	442.363	174.167	184.357	249.46	290.84	306.371	333.36
Fh	Fumarate hydratase, mitochondrial OS=Mus musculus GN=Fh PE=1 SV=3	9.38	54585	1476.91	P97807	15	55.23	0.0024	FUMH_MOUSE	303.07	250.794	272.121	331.723	307.287	280.348	344.504	267.152	287.036	339.383	323.457	310.624	301.458	328.015
Gstm2	Glutathione S-transferase Mu 2 OS=Mus musculus GN=Gstm2 PE=1 SV=2	7.44	25887.9	10876.3	P15626	14	66.06	0	GSTM2_MOUSE	349.239	336.035	300.542	374.232	228.684	231.003	320.571	323.443	297.958	371.908	231.632	243.658	300.742	327.236
Rtcb	tRNA-splicing ligase RtcB homolog OS=Mus musculus GN=Rtcb PE=2 SV=1	6.81	55762.7	355.465	Q99LF4	5	16.04	0.0024	RTCB_MOUSE	348.973	351.328	228.255	276.975	296.68	312.179	312.874	333.249	218.554	307.181	275.592	329.34	299.265	325.628
Pc	Pyruvate carboxylase, mitochondrial OS=Mus musculus GN=Pc PE=1 SV=1	6.24	130426	212.179	Q05920	4	4.33	0.003	PYC_MOUSE	241.197	236.081	323.301	473.675	354.941	356.284	237.791	238.286	283.574	308.313	267.851	264.323	298.802	325.124
Pafah1b1	Platelet-activating factor acetylhydrolase IB subunit alpha OS=Mus musculus GN=Pafah1b1 PE=1 SV=2	7.01	47240.4	2214.59	P63005	15	43.9	0	LIS1_MOUSE	350.728	309.416	248.216	288.954	308.195	272.883	324.776	304.777	261.56	302.343	275.345	327.081	297.856	324.095
Ctnna3	Catenin alpha-3 OS=Mus musculus GN=Ctnna3 PE=1 SV=2	6.07	100715	401.762	Q65CL1	12	21.79	0.0024	CTNA3_MOUSE	300.067	406.229	224.735	290.949	314.284	353.401	273.131	261.624	250.148	274.369	302.173	313.585	297.058	323.227
Phb2	Prohibitin-2 OS=Mus musculus GN=Phb2 PE=1 SV=1	10.19	33296.4	5707.49	O35129	10	41.81	0	PHB2_MOUSE	332.436	274.079	237.232	287.401	294.969	274.106	377.575	292.232	247.685	304.704	302.591	313.089	294.842	320.815
Atp5h	ATP synthase subunit d, mitochondrial OS=Mus musculus GN=Atp5h PE=1 SV=3	5.37	18806.5	6290.29	Q9DCX2	9	64.6	0	ATP5H_MOUSE	335.173	361.405	218.455	282.788	288.172	284.019	346.033	344.071	215.322	264.411	283.733	304.358	293.995	319.894
Usp5	Ubiquitin carboxyl-terminal hydrolase 5 OS=Mus musculus GN=Usp5 PE=1 SV=1	4.7	96745.9	956.061	P56399	12	23.19	0.0024	UBP5_MOUSE	492.963	406.375	125.201	151.506	255.318	256.377	510.467	404.163	145.924	154.808	279.713	269.103	287.66	313.001
Crmp1	Dihydropyrimidinase-related protein 1 OS=Mus musculus GN=Crmp1 PE=1 SV=1	6.78	62510	5120.56	P97427	20	63.11	0	DPYL1_MOUSE	274.351	243.878	267.289	295.84	327.938	322.578	264.561	274.566	260.761	284.61	291.35	339.774	287.291	312.6
Klc1	Kinesin light chain 1 OS=Mus musculus GN=Klc1 PE=1 SV=3	5.36	61906.4	1072.53	O88447	18	39.19	0.0024	KLC1_MOUSE	313.507	275.919	243.176	287.206	307.642	296.565	281.717	272.617	240.414	298.451	306.432	309.998	286.137	311.344
Opa1	Dynamin-like 120 kDa protein, mitochondrial OS=Mus musculus GN=Opa1 PE=1 SV=1	7.23	111853	240.857	P58281	4	6.04	0.003	OPA1_MOUSE	325.288	286.662	254.275	257.67	293.021	308.28	315.87	272.54	219.208	257.14	295.088	311.647	283.058	307.993
Add1	Alpha-adducin OS=Mus musculus GN=Add1 PE=1 SV=2	5.52	81045.8	1014.97	Q9QYC0	15	36.73	0.0024	ADDA_MOUSE	347.649	325.515	243.283	253.611	308.912	315.306	299.339	317.414	234.699	199.035	257.143	290.177	282.674	307.575
Cct3	T-complex protein 1 subunit gamma OS=Mus musculus GN=Cct3 PE=1 SV=1	6.26	61200.4	1212.35	P80318	21	48.07	0.0024	TCPG_MOUSE	269.811	243.901	229.568	343.071	298.667	295.231	250.295	274.468	259.077	285.9	295.269	326.377	280.97	305.721
Vdac3	Voltage-dependent anion-selective channel protein 3 OS=Mus musculus GN=Vdac3 PE=1 SV=1	9	31094.9	2493.37	Q60931	8	39.58	0	VDAC3_MOUSE	319.301	332.207	201.181	233.177	249.192	262.178	341.191	308.354	190.559	272.02	327.59	298.54	277.958	302.444
Rpsa	40S ribosomal protein SA OS=Mus musculus GN=Rpsa PE=1 SV=4	4.6	32952.2	1591.22	P14206	9	51.19	0.0024	RSSA_MOUSE	381.865	458.283	160.333	162.838	252.519	203.987	511.161	380.932	139.79	166.91	290.248	225.514	277.865	302.343
Sirt2	NAD-dependent protein deacetylase sirtuin-2 OS=Mus musculus GN=Sirt2 PE=1 SV=2	5.06	43883.6	1513.53	Q8VDQ8	13	53.98	0.0024	SIR2_MOUSE	350.814	332.64	252.622	286.638	245.474	231.927	299.126	335.08	233.408	285.097	244.01	233.519	277.53	301.978
Mapk3	Mitogen-activated protein kinase 3 OS=Mus musculus GN=Mapk3 PE=1 SV=5	6.14	43408.7	3070.69	Q63844	15	57.11	0	MK03_MOUSE	293.644	280.929	254.184	292.94	288.718	280.399	267.741	265.721	241.522	253.44	286.658	298.437	275.361	299.619
Paics	Multifunctional protein ADE2 OS=Mus musculus GN=Paics PE=1 SV=4	6.97	47747.5	2017.71	Q9DCL9	15	50.59	0	PUR6_MOUSE	274.92	266.51	250.259	297.54	306.498	280.616	265.72	272.916	240.939	277.325	283.968	285.185	275.2	299.443
Maoa	Amine oxidase [flavin-containing] A OS=Mus musculus GN=Maoa PE=1 SV=3	7.73	60172.3	983.776	Q64133	10	25.29	0.0024	AOFA_MOUSE	298.636	288.027	223.475	253.135	290.144	269.1	321.602	287.345	217.029	290.771	274.779	253.795	272.32	296.309
Calm1	Calmodulin OS=Mus musculus GN=Calm1 PE=1 SV=2	3.88	16837.7	6491.91	P62204	8	53.02	0	CALM_MOUSE	289.959	401.366	214.515	238.548	241.216	262.996	247.995	405.508	190.592	216.252	266.229	289.682	272.072	296.039
Cd59a	CD59A glycoprotein OS=Mus musculus GN=Cd59a PE=2 SV=1	7.34	14332.4	6635.31	O55186	2	21.14	0	CD59A_MOUSE	273.472	280.924	283.992	327.353	273.534	303.02	265.4	233.567	257.055	292.87	237.324	234.911	271.952	295.909
Me1	NADP-dependent malic enzyme OS=Mus musculus GN=Me1 PE=1 SV=2	7.19	64581.2	668.298	P06801	16	42.13	0.0024	MAOX_MOUSE	251.868	232.401	305.044	369.291	223.549	271.826	214.022	210.218	310.459	390.638	201.312	247.92	269.046	292.747
Brox	BRO1 domain-containing protein BROX OS=Mus musculus GN=Brox PE=2 SV=1	7.55	46715.1	1021.84	Q8K2Q7	9	37.47	0.0024	BROX_MOUSE	301.365	252.644	279.894	287.933	237.099	256.868	230.506	250.336	260.567	317.336	260.032	272.632	267.268	290.812
Thy1	Thy-1 membrane glycoprotein OS=Mus musculus GN=Thy1 PE=1 SV=1	9.27	18308.1	3388.82	P01831	4	31.48	0	THY1_MOUSE	353.663	343.391	173.345	233.85	268.277	241.087	347.3	365.813	182.173	207.364	251.071	221.06	265.7	289.106
Cct7	T-complex protein 1 subunit eta OS=Mus musculus GN=Cct7 PE=1 SV=1	7.78	60165.5	1060.77	P80313	14	37.32	0.0024	TCPH_MOUSE	246.386	354.461	272.068	322.013	254.839	261.758	243.327	278.215	229.771	257.411	235.956	230.701	265.575	288.971
Cyfip1	Cytoplasmic FMR1-interacting protein 1 OS=Mus musculus GN=Cyfip1 PE=1 SV=1	6.45	146896	371.217	Q7TMB8	12	12.85	0.0024	CYFP1_MOUSE	335.167	243.931	179.077	203.603	293.848	273.618	271.954	268.757	226.799	238.149	279.94	347.824	263.556	286.773
Dynll1	Dynein light chain 1, cytoplasmic OS=Mus musculus GN=Dynll1 PE=1 SV=1	7.23	10537	35651.8	P63168	4	57.3	0	DYL1_MOUSE	248.88	263.463	252.843	255.144	286.211	275.995	253.608	281.052	252.492	244.946	271.858	264.063	262.546	285.675
Uchl1	Ubiquitin carboxyl-terminal hydrolase isozyme L1 OS=Mus musculus GN=Uchl1 PE=1 SV=1	4.97	25180.5	2568.44	Q9R0P9	6	44.39	0	UCHL1_MOUSE	361.241	458.935	162.699	172.872	236.451	262.379	290.034	354.509	148.333	185.329	220.432	259.496	259.392	282.243
Rap1a	Ras-related protein Rap-1A OS=Mus musculus GN=Rap1a PE=2 SV=1	6.53	21329.4	9888.41	P62835	10	72.83	0	RAP1A_MOUSE	286.585	279.493	224.378	276.25	305.447	286.78	195.123	285.963	202.858	210.558	247.341	291.429	257.684	280.384
Dync1i2	Cytoplasmic dynein 1 intermediate chain 2 OS=Mus musculus GN=Dync1i2 PE=1 SV=1	5	68793.4	1166.62	O88487	14	42.97	0.0024	DC1I2_MOUSE	270.228	231.275	245.072	246.366	288.629	264.17	260.373	259.008	222.245	257.772	268.174	269.767	256.923	279.557
Rpl3	60S ribosomal protein L3 OS=Mus musculus GN=Rpl3 PE=1 SV=3	10.65	46395.1	1252.82	P27659	12	40.45	0.0024	RL3_MOUSE	260.619	256.727	187	220.299	287.567	307.195	236.456	251.647	187.858	236.765	316.722	326.154	256.251	278.825
Dnm3	Dynamin-3 OS=Mus musculus GN=Dnm3 PE=1 SV=1	8.46	97589.8	834.654	Q8BZ98	17	25.14	0.0024	DYN3_MOUSE	245.827	272.56	241.711	281.955	265.893	290.927	230.446	295.919	208.861	216.914	216.726	282.412	254.179	276.571
Ipo5	Importin-5 OS=Mus musculus GN=Ipo5 PE=1 SV=3	4.63	125074	286.147	Q8BKC5	6	7.84	0.003	IPO5_MOUSE	304.877	227.412			251.406	199.21	352.486	289.417	162.506		262.881	236.991	254.132	276.519
Coro1a	Coronin-1A OS=Mus musculus GN=Coro1a PE=1 SV=5	6.03	51673.6	824.352	O89053	7	26.68	0.0024	COR1A_MOUSE	243.898	233.059	259.731	298.834	256.813	248.511	213.742	235.247	246.788	312.576	223.531	258.043	252.564	274.814
Gatm	Glycine amidinotransferase, mitochondrial OS=Mus musculus GN=Gatm PE=1 SV=1	7.8	48810.6	1881.19	Q9D964	16	62.17	0	GATM_MOUSE	233.74	224.684	223.488	271.502	289.593	265.306	245.544	223.909	225.875	291.422	261.792	272.855	252.476	274.717
Cpne3	Copine-3 OS=Mus musculus GN=Cpne3 PE=2 SV=2	5.41	60326.4	626.979	Q8BT60	12	33.21	0.0024	CPNE3_MOUSE	252	265.482	269.796	333.423	200.966	203.095	245.11	287.04	285.343	268.017	187.24	221.743	251.604	273.769
Phb	Prohibitin OS=Mus musculus GN=Phb PE=1 SV=1	5.43	29877.1	4592.75	P67778	11	62.13	0	PHB_MOUSE	278.161	278.796	229.176	236.96	255.853	287.215	250.966	249.769	207.837	238.273	246.783	258.196	251.499	273.654
Nedd4	E3 ubiquitin-protein ligase NEDD4 OS=Mus musculus GN=Nedd4 PE=1 SV=3	4.94	103220	342.174	P46935	10	14.77	0.0024	NEDD4_MOUSE	258.602	215.522	193.461	260.132	319.007	238.466	249.417	229.847	192.552	253.808	342.995	260.199	251.167	273.294
Rplp0	60S acidic ribosomal protein P0 OS=Mus musculus GN=Rplp0 PE=1 SV=3	5.85	34387.6	2576.49	P14869	12	47.63	0	RLA0_MOUSE	290.768	259.654	176.896	204.439	297.216	281.415	281.996	259.167	180.943	209.805	278.331	280.417	250.087	272.118
Snd1	Staphylococcal nuclease domain-containing protein 1 OS=Mus musculus GN=Snd1 PE=1 SV=1	7.09	102773	496.337	Q78PY7	20	32.97	0.0024	SND1_MOUSE	309.083	323.029	186.94	201.523	249.444	272.371	293.478	290.266	151.699	210.824	246.891	240.071	247.968	269.813
Actr1a	Alpha-centractin OS=Mus musculus GN=Actr1a PE=2 SV=1	6.18	42727.9	2124.62	P61164	13	52.66	0	ACTZ_MOUSE	239.123	318.868	226.949	240.204	240.521	280.357	217.136	276.004	204.723	230.625	237.711	255.689	247.326	269.114
Rtn1	Reticulon-1 OS=Mus musculus GN=Rtn1 PE=1 SV=1	4.29	83914.7	424.802	Q8K0T0	10	17.69	0.0024	RTN1_MOUSE	338.889	305.755	150.084	180.703	266.631	248.075	241.003	304.38	189.762	173.971	276.687	279.208	246.262	267.956
Ola1	Obg-like ATPase 1 OS=Mus musculus GN=Ola1 PE=1 SV=1	7.83	44957.7	1803.69	Q9CZ30	12	45.71	0	OLA1_MOUSE	253.96	202.468	214.182	257.056	279.497	249.858	221.908	234.736	241.266	275.449	248.204	275.722	246.192	267.88
Ddx3x	ATP-dependent RNA helicase DDX3X OS=Mus musculus GN=Ddx3x PE=1 SV=3	6.77	73500.7	669.275	Q62167	14	25.53	0.0024	DDX3X_MOUSE	277.17	269.888	216.724	233.43	294.489	280.644	242.055	218.551	175.401	202.589	268.606	272.179	245.977	267.646
Fut8	Alpha-(1,6)-fucosyltransferase OS=Mus musculus GN=Fut8 PE=2 SV=2	7.19	67013.1	403.832	Q9WTS2	11	28.52	0.0024	FUT8_MOUSE	269.675	237.508	186.587	217.964	285.079	252.435	281.554	256.137	194.422	213.585	280.812	275.34	245.925	267.589
Lss	Lanosterol synthase OS=Mus musculus GN=Lss PE=2 SV=2	5.94	84453.1	536.19	Q8BLN5	20	35.2	0.0024	ERG7_MOUSE	317.367	282.363	201.298	224.735	250.558	254.687	271.145	291.347	163.769	220.588	240.978	228.958	245.649	267.29
Nsdhl	Sterol-4-alpha-carboxylate 3-dehydrogenase, decarboxylating OS=Mus musculus GN=Nsdhl PE=2 SV=1	7.78	40971.1	1471.47	Q9R1J0	12	50.55	0.0024	NSDHL_MOUSE	309.38	261.61	184.309	218.999	250.952	244.661	258.27	261.812	183.465	251.203	273.822	243.277	245.147	266.742
Hspa2	Heat shock-related 70 kDa protein 2 OS=Mus musculus GN=Hspa2 PE=1 SV=2	5.34	69926.9	7626.2	P17156	14	25.12	0	HSP72_MOUSE	281.109	260.935	201.322	217.448	261.507	270.309	237.756	245.256	194.358	246.851	253.931	251.812	243.55	265.005
Copb2	Coatomer subunit beta' OS=Mus musculus GN=Copb2 PE=2 SV=2	5	103305	365.007	O55029	7	13.92	0.0024	COPB2_MOUSE	265.168	249.089	188.076	197.667	292.009	270.028	262.069	259.67	174.01	191.063	269.948	303.797	243.55	265.005
Reep5	Receptor expression-enhancing protein 5 OS=Mus musculus GN=Reep5 PE=1 SV=1	8.54	21278.8	1487.85	Q60870	3	21.62	0.0024	REEP5_MOUSE	334.71	230.18	173.107	246.978	231.168	219.348	342.821	201.027	218.767	235.837	231.744	221.134	240.568	261.761
Cnrip1	CB1 cannabinoid receptor-interacting protein 1 OS=Mus musculus GN=Cnrip1 PE=1 SV=1	8.19	18726.4	4086.39	Q5M8N0	5	54.88	0	CNRP1_MOUSE	203.311	233.51	225.331	276.317	252.417	249.429	191.214	225.498	238.761	266.489	266.306	251.087	239.972	261.112
Fabp9	Fatty acid-binding protein 9 OS=Mus musculus GN=Fabp9 PE=2 SV=2	7.83	15245.5	1612.08	O08716	2	14.39	0.0024	FABP9_MOUSE	214.523	198.181	255.803	281.433	247.581	237.418	195.953	195.899	234.336	293.278	254.567	235.267	237.02	257.9
Cast	Calpastatin OS=Mus musculus GN=Cast PE=1 SV=2	5.21	85149.9	181.079	P51125	2	5.46	0.003	ICAL_MOUSE	249.59	317.212	256.305	299.375	167.545	176.716	214.264	294.133	224.644	287.332	153.193	185.754	235.505	256.252
Gpd2	Glycerol-3-phosphate dehydrogenase, mitochondrial OS=Mus musculus GN=Gpd2 PE=1 SV=2	6.15	81467.1	257.717	Q64521	5	8.94	0.003	GPDM_MOUSE	241.813	219.173	215.588	256.433	234.845	238.077	249.035	218.715	227.286	243.983	252.337	226.986	235.356	256.089
Ganab	Neutral alpha-glucosidase AB OS=Mus musculus GN=Ganab PE=1 SV=1	5.61	107368	472.033	Q8BHN3	6	13.03	0.0024	GANAB_MOUSE	238.895	221.482	252.823	264.405	189.149	220.911	217.063	256.132	224.827	298.969	202.157	227.242	234.505	255.163
Rab5c	Ras-related protein Rab-5C OS=Mus musculus GN=Rab5c PE=1 SV=2	8.58	23640.7	5701.89	P35278	10	71.76	0	RAB5C_MOUSE	231.699	199.248	200.898	244.382	272.819	247.613	252.153	213.324	183.082	230.625	275.365	256.888	234.008	254.622
Por	NADPH--cytochrome P450 reductase OS=Mus musculus GN=Por PE=2 SV=2	5.2	77443.3	256.004	P37040	3	6.93	0.003	NCPR_MOUSE	277.958	242.914	198.319	349.24	233.054	224.331	223.918	203.392	184.584	249.453	245.637	174.253	233.921	254.528
Gnai1	Guanine nucleotide-binding protein G(i) subunit alpha-1 OS=Mus musculus GN=Gnai1 PE=2 SV=1	5.59	40931.4	3139.67	B2RSH2	14	50.85	0	GNAI1_MOUSE	262.636	228.497	166.385	226.963	257.864	237.929	246.778	241.508	163.269	227.848	251.139	257.046	230.655	250.974
Cers2	Ceramide synthase 2 OS=Mus musculus GN=Cers2 PE=1 SV=1	8.95	45195.5	385.679	Q924Z4	2	9.47	0.0024	CERS2_MOUSE	245.407	239.136	165.448	203.102	250.88	261.777	305.44	209.605	159.579	248.958	228.478	248.277	230.507	250.813
Cyb5a	Cytochrome b5 OS=Mus musculus GN=Cyb5a PE=1 SV=2	4.76	15241	4051.99	P56395	4	41.04	0	CYB5_MOUSE	273.447	278.909	173.413	197.585	240.409	236.514	264.712	257.059	164.671	200.086	234.246	230.234	229.274	249.471
Atp12a	Potassium-transporting ATPase alpha chain 2 OS=Mus musculus GN=Atp12a PE=1 SV=3	5.9	115468	822.015	Q9Z1W8	7	6.76	0.0024	AT12A_MOUSE	261.593	259.19	162.701	205.898	257.707	247.213	261.445	238.902	157.87	207.072	241.551	249.36	229.208	249.4
Ndufv1	NADH dehydrogenase [ubiquinone] flavoprotein 1, mitochondrial OS=Mus musculus GN=Ndufv1 PE=1 SV=1	8.15	51518.6	2126.48	Q91YT0	19	57.76	0	NDUV1_MOUSE	238.813	225.806	207.435	234.113	220.787	213.986	280.797	218.607	211.119	254.193	229.588	204.622	228.322	248.436
Fam129a	Protein Niban OS=Mus musculus GN=Fam129a PE=1 SV=2	4.53	103505	299.891	Q3UW53	7	10.58	0.003	NIBAN_MOUSE	292.642	222.367	152.849	155.045	278.836	244.708	257.607	243.786	131.768	165.583	298.958	280.285	227.036	247.037
Aldh1a7	Aldehyde dehydrogenase, cytosolic 1 OS=Mus musculus GN=Aldh1a7 PE=2 SV=1	7.58	55044.1	900.718	O35945	10	22.16	0.0024	AL1A7_MOUSE	214.198	247.425	277.503	295.895	179.949	194.976	218.681	207.43	241.536	302.368	163.045	172.798	226.317	246.254
Aspa	Aspartoacylase OS=Mus musculus GN=Aspa PE=1 SV=2	6.11	35800.9	605.007	Q8R3P0	9	47.44	0.0024	ACY2_MOUSE	214.489	235.656	253.28	352.958	161.884	150.98	177.842	184.988	291.478	382.455	143.811	160.543	225.864	245.761
Nptn	Neuroplastin OS=Mus musculus GN=Nptn PE=1 SV=3	7.66	44715.3	348.26	P97300	3	10.08	0.0024	NPTN_MOUSE	277.488	290.07	171.72	170.386	241.485	251.897	246.41	240.475	163.563	199.611	234.313	197.955	223.781	243.495
Atp5c1	ATP synthase subunit gamma, mitochondrial OS=Mus musculus GN=Atp5c1 PE=1 SV=1	9.36	33000	1470.59	Q91VR2	8	35.91	0.0024	ATPG_MOUSE	255.844	293.967	165.81	217.275	225.202	225.223	235.116	222.51	164.459	199.136	244.495	223.715	222.729	242.35
Tgfbi	Transforming growth factor-beta-induced protein ig-h3 OS=Mus musculus GN=Tgfbi PE=2 SV=1	6.64	75224.5	482.844	P82198	8	23.28	0.0024	BGH3_MOUSE	210.39	309.776	186.782	216.764	236.598	303.954	193.021	212.763	158.969	184.439	239.798	214.458	222.309	241.893
Dync1li1	Cytoplasmic dynein 1 light intermediate chain 1 OS=Mus musculus GN=Dync1li1 PE=1 SV=1	5.97	56899.4	956.7	Q8R1Q8	17	50.48	0.0024	DC1L1_MOUSE	285.74	304.41	192.085	249.418	193.421	226.214	155.325	239.705	210.924	223.769	169.749	215.703	222.205	241.78
Actr2	Actin-related protein 2 OS=Mus musculus GN=Actr2 PE=1 SV=1	6.3	45046	641.857	P61161	7	25.89	0.0024	ARP2_MOUSE	248.395	272.293	175.952	187.618	224.402	205.093	242.202	258.688	166.146	202.29	232.53	234.601	220.851	240.306
Kng1	Kininogen-1 OS=Mus musculus GN=Kng1 PE=1 SV=1	6.05	74185.7	385.47	O08677	10	23.3	0.0024	KNG1_MOUSE	389.413	350.484	136.424	142.044	170.196	168.172	307.34	372.846	130.047	148.124	164.844	167.767	220.642	240.079
Add3	Gamma-adducin OS=Mus musculus GN=Add3 PE=1 SV=2	5.56	79119.4	431.446	Q9QYB5	11	22.38	0.0024	ADDG_MOUSE	252.868	225.102	181.342	205.186	251.572	240.901	227.687	212.823	185.459	205.377	228.264	230.414	220.583	240.015
Hsd17b11	Estradiol 17-beta-dehydrogenase 11 OS=Mus musculus GN=Hsd17b11 PE=2 SV=1	8.88	33165.8	1361.56	Q9EQ06	8	39.6	0.0024	DHB11_MOUSE	260.927	244.43	191.555	195.756	263.497	267.846	146.166	272.646	142.733	111.643	202.642	341.981	220.152	239.546
Pgk1	Phosphoglycerate kinase 1 OS=Mus musculus GN=Pgk1 PE=1 SV=4	7.9	44949.8	1034.53	P09411	14	46.76	0.0024	PGK1_MOUSE	218.473	194.204	223.335	164.307	253.146	237.007	233.374	202.842	217.889	200.785	241.766	238.892	218.835	238.113
Acsl1	Long-chain-fatty-acid--CoA ligase 1 OS=Mus musculus GN=Acsl1 PE=1 SV=2	6.8	78978.1	529.904	P41216	12	22.46	0.0024	ACSL1_MOUSE	169.667	165.19	255.536	263.907	223.494	226.473	191.515	147.426	237.86	286.219	229.697	227.607	218.716	237.983
Coro1c	Coronin-1C OS=Mus musculus GN=Coro1c PE=1 SV=2	6.67	53805.3	1143.78	Q9WUM4	11	31.65	0.0024	COR1C_MOUSE	237.951	202.75	205.291	239.538	206.668	200.62	238.207	202.514	206.807	263.941	207.783	211.689	218.647	237.908
Aldh9a1	4-trimethylaminobutyraldehyde dehydrogenase OS=Mus musculus GN=Aldh9a1 PE=1 SV=1	6.62	54484.3	639.238	Q9JLJ2	9	26.11	0.0024	AL9A1_MOUSE	202.36	237.434	245.478	221.844	208.933	223.557	143.287	214.996	222.381	236.56	201.351	248.639	217.235	236.372
Rab1A	Ras-related protein Rab-1A OS=Mus musculus GN=Rab1A PE=1 SV=3	5.85	22905.9	6035.96	P62821	11	62.44	0	RAB1A_MOUSE	238.5	187.287	163.175	190.332	260.155	222.671	258.564	209.037	166.42	195.388	262.516	248.326	216.864	235.969
Anpep	Aminopeptidase N OS=Mus musculus GN=Anpep PE=1 SV=4	5.52	110108	302.101	P97449	10	16.67	0.003	AMPN_MOUSE	228.598	312.026	184.421	193.604	197.221	245.797	251.524	251.95	158.085	156.678	202.572	218.823	216.775	235.871
Mapre1	Microtubule-associated protein RP/EB family member 1 OS=Mus musculus GN=Mapre1 PE=1 SV=3	4.93	30187.3	3862.04	Q61166	9	44.03	0	MARE1_MOUSE	178.84	169.84	197.603	227.478	279.426	286.549	187.387	171.247	188	217.963	227.897	264.62	216.404	235.468
Uqcrfs1	Cytochrome b-c1 complex subunit Rieske, mitochondrial OS=Mus musculus GN=Uqcrfs1 PE=1 SV=1	8.91	29652.8	1037.95	Q9CR68	6	21.9	0.0024	UCRI_MOUSE	185.228	193.276	211.685	202.253	251.63	245.449	188.223	204.165	190.199	230.163	241.488	249.763	216.127	235.166
Etfb	Electron transfer flavoprotein subunit beta OS=Mus musculus GN=Etfb PE=1 SV=3	8.25	27851.4	3132.47	Q9DCW4	10	48.63	0	ETFB_MOUSE	151.294	134.651	275.228	335.411	222.015	200.527	143.322	132.527	266.712	322.28	194.319	215.148	216.12	235.158
Arpc1b	Actin-related protein 2/3 complex subunit 1B OS=Mus musculus GN=Arpc1b PE=2 SV=4	8.3	41862.3	1100.74	Q9WV32	11	40.86	0.0024	ARC1B_MOUSE	234.336	203.341	171.21	195.449	217.168	233.89	252.187	219.613	173.537	212.451	247.652	220.756	215.132	234.084
Hspa1a	Heat shock 70 kDa protein 1A OS=Mus musculus GN=Hspa1a PE=1 SV=2	5.38	70364.4	4181.27	Q61696	13	34.63	0	HS71A_MOUSE	247.848	262.016	146.141	195.749	218.211	221.484	203.832	278.39	141.123	211.67	196.978	228.57	212.668	231.402
Hnrnpk	Heterogeneous nuclear ribonucleoprotein K OS=Mus musculus GN=Hnrnpk PE=1 SV=1	5.22	51261.5	1157.56	P61979	12	40.82	0.0024	HNRPK_MOUSE	261.882	264.213	157.545	187.128	213.458	221.428	246.006	258.48	147.046	184.878	196.9	198.114	211.423	230.048
Eif4a2	Eukaryotic initiation factor 4A-II OS=Mus musculus GN=Eif4a2 PE=2 SV=2	5.16	46630.5	1460.8	P10630	12	39.8	0.0024	IF4A2_MOUSE	264.977	259.278	141.959	184.747	212.024	215.998	245.429	259.479	137.717	185.504	226.749	200.682	211.212	229.818
Mthfd1	C-1-tetrahydrofolate synthase, cytoplasmic OS=Mus musculus GN=Mthfd1 PE=1 SV=4	6.72	101884	304.935	Q922D8	11	15.61	0.003	C1TC_MOUSE	208.22	209.756	142.526	206.024	232.137	203.011	235.302	207.734	154.245	250.497	243.973	240.972	211.2	229.805
Picalm	Phosphatidylinositol-binding clathrin assembly protein OS=Mus musculus GN=Picalm PE=1 SV=1	7.96	71714.6	406.073	Q7M6Y3	5	10	0.0024	PICAL_MOUSE	216.65	170.822	178.767	211.265	240.289	210.176	240.195	179.146	182.097	223.928	255.158	221.757	210.854	229.429
Cyc1	Cytochrome c1, heme protein, mitochondrial OS=Mus musculus GN=Cyc1 PE=1 SV=1	9.37	35555.8	1664.05	Q9D0M3	8	44.92	0.0024	CY1_MOUSE	188.644	182.76	186.458	218.167	218.759	221.804	203.034	250.446	185.808	217.38	206.302	248.067	210.636	229.191
Fam49b	Protein FAM49B OS=Mus musculus GN=Fam49b PE=2 SV=1	5.68	37061.2	1341.74	Q921M7	10	42.28	0.0024	FA49B_MOUSE	189.014	222.011	397.806	183.276	143.488	133.977	209.808	223.771	356.302	188.913	144.205	125.718	209.857	228.344
Wars	Tryptophan--tRNA ligase, cytoplasmic OS=Mus musculus GN=Wars PE=1 SV=2	6.45	54928.3	842.137	P32921	9	27.03	0.0024	SYWC_MOUSE	179.222	151.065	215.076	243.96	229.455	208.23	179.928	155.059	221.006	257.686	242.851	233.441	209.748	228.226
Dctn2	Dynactin subunit 2 OS=Mus musculus GN=Dctn2 PE=1 SV=3	4.97	44231	1832.79	Q99KJ8	15	59.45	0	DCTN2_MOUSE	256.322	225.984	161.865	198.819	214.421	215.153	225.661	232.101	160.048	208.172	197.374	218.588	209.542	228.002
Gjb1	Gap junction beta-1 protein OS=Mus musculus GN=Gjb1 PE=1 SV=3	9.07	32573.8	573.772	P28230	5	19.43	0.0024	CXB1_MOUSE	194.729	192.593	209.796	250.982	220.007	229.752	184.277	168.268	193.637	274.05	190.969	201.886	209.246	227.679
Avil	Advillin OS=Mus musculus GN=Avil PE=1 SV=2	5.2	92374.2	519.135	O88398	13	21.98	0.0024	AVIL_MOUSE	332.711	360.06	98.7681	130.379	166.268	167.324	327.108	363.92	91.2104	114.554	172.18	169.798	207.857	226.168
Tecr	Very-long-chain enoyl-CoA reductase OS=Mus musculus GN=Tecr PE=1 SV=1	9.78	36489.7	782.486	Q9CY27	7	21.1	0.0024	TECR_MOUSE	274.215	259.537	132.866	136.629	226.459	197.011	274.768	267.31	144.823	142.848	204.092	227.32	207.323	225.587
Flot2	Flotillin-2 OS=Mus musculus GN=Flot2 PE=1 SV=2	4.94	47437.3	963.242	Q60634	12	33.18	0.0024	FLOT2_MOUSE	190.714	223.613	245.801	265.408	183.094	191.06	179.992	216.847	207.563	238.685	159.04	171.157	206.081	224.236
Ndufs2	NADH dehydrogenase [ubiquinone] iron-sulfur protein 2, mitochondrial OS=Mus musculus GN=Ndufs2 PE=1 SV=1	6.54	53025	714.099	Q91WD5	10	28.29	0.0024	NDUS2_MOUSE	218.108	210.024	189.428	222.238	203.552	203.221	193.508	216.842	179.988	212.481	208.593	213.609	205.966	224.11
Tufm	Elongation factor Tu, mitochondrial OS=Mus musculus GN=Tufm PE=1 SV=1	7.32	49907.6	1191.19	Q8BFR5	14	45.58	0.0024	EFTU_MOUSE	205.563	201.407	190.559	211.015	209.751	198.669	202.348	192.018	180.801	230.326	208.607	226.362	204.785	222.826
Slc25a31	ADP/ATP translocase 4 OS=Mus musculus GN=Slc25a31 PE=2 SV=1	9.89	35543.1	3084.35	Q3V132	5	16.56	0	ADT4_MOUSE	246.638	236.555	154.155	175.192	210.758	200.072	239.924	234.99	149.976	181.971	197.284	199.531	202.254	220.071
Abcd3	ATP-binding cassette sub-family D member 3 OS=Mus musculus GN=Abcd3 PE=1 SV=2	9.48	75988.1	357.984	P55096	6	13.2	0.0024	ABCD3_MOUSE	205.48	197.878	149.042	213.246	220.179	211.156	239.968	192.263	149.585	201.113	225.611	206.314	200.986	218.692
Ndufa10	NADH dehydrogenase [ubiquinone] 1 alpha subcomplex subunit 10, mitochondrial OS=Mus musculus GN=Ndufa10 PE=1 SV=1	7.73	40888.6	969.549	Q99LC3	12	52.39	0.0024	NDUAA_MOUSE	197.16	221.153	185.848	216.042	196.204	212.398	181.494	201.133	167.476	218.062	203.097	208.472	200.712	218.393
Fdft1	Squalene synthase OS=Mus musculus GN=Fdft1 PE=2 SV=2	5.87	48838.7	648.653	P53798	11	33.89	0.0024	FDFT_MOUSE	246.372	245.255	144.8	178.134	222.574	211.049	223.591	216.721	133.082	163.122	193.639	226.72	200.422	218.077
Plin3	Perilipin-3 OS=Mus musculus GN=Plin3 PE=1 SV=1	5.31	47376.4	719.942	Q9DBG5	9	35.01	0.0024	PLIN3_MOUSE	269.469	256.742	109.214	156.329	207.415	182.647	276.164	261.178	132.197	132.323	213.472	199.338	199.707	217.3
Eprs	Bifunctional glutamate/proline--tRNA ligase OS=Mus musculus GN=Eprs PE=1 SV=4	7.48	171847	264.103	Q8CGC7	3	2.78	0.003	SYEP_MOUSE	245.867	186.634			135.811	159.744	270.353	227.431			203.959	162.693	199.062	216.598
Ctsd	Cathepsin D OS=Mus musculus GN=Ctsd PE=1 SV=1	6.77	45410.1	1244.81	P18242	9	29.27	0.0024	CATD_MOUSE	183.257	253.888	195.268	236.94	175.587	210.74	191.942	271.262	156.867	160.405	149.878	181.556	197.299	214.68
Lap3	Cytosol aminopeptidase OS=Mus musculus GN=Lap3 PE=1 SV=3	7.63	56540.6	1326.95	Q9CPY7	17	47.21	0.0024	AMPL_MOUSE	168.332	158.127	227.84	240.698	200.271	191.897	167.278	175.535	215.535	223.621	190.256	190.043	195.786	213.034
Aacs	Acetoacetyl-CoA synthetase OS=Mus musculus GN=Aacs PE=2 SV=1	6.25	75713.6	427.161	Q9D2R0	13	24.11	0.0024	AACS_MOUSE	277.084	255.211	142.558	160.946	187.311	190.09	258.587	238.691	128.298	169.86	172.234	166.393	195.605	212.837
Park7	Protein deglycase DJ-1 OS=Mus musculus GN=Park7 PE=1 SV=1	6.36	20249.5	4092.29	Q99LX0	13	85.19	0	PARK7_MOUSE	201.894	227.031	198.901	222.658	153.64	141.394	215.141	239.91	207.284	244.132	137.581	151.14	195.059	212.242
Fkbp3	Peptidyl-prolyl cis-trans isomerase FKBP3 OS=Mus musculus GN=Fkbp3 PE=1 SV=2	9.73	25204.8	1524.27	Q62446	6	28.13	0.0024	FKBP3_MOUSE	204.098	199.647	178.427	193.751	195.389	192.088	224.279	206.481	140.35	181.075	209.669	213.827	194.923	212.095
Hepacam	Hepatocyte cell adhesion molecule OS=Mus musculus GN=Hepacam PE=1 SV=2	9.73	46595	274.383	Q640R3	3	15.07	0.003	HECAM_MOUSE	200.615	174.698	167.875	179.615	217.705	203.395	197.349	192.078	158.527	204.747	211.579	219.349	193.961	211.048
Hist1h3b	Histone H3.2 OS=Mus musculus GN=Hist1h3b PE=1 SV=2	11.68	15445.1	5416.43	P84228	3	33.82	0	H32_MOUSE	158.38	314.879	202.585	175.814	168.881	297.393	155.374	148.485	151.573	188.974	167.363	182.569	192.689	209.664
Eif4a1	Eukaryotic initiation factor 4A-I OS=Mus musculus GN=Eif4a1 PE=1 SV=1	5.15	46382.2	1573.09	P60843	13	42.12	0.0024	IF4A1_MOUSE	210.625	210.175	148.701	172.884	209.703	216.614	201.154	210.895	133.906	179.478	213.487	204.435	192.671	209.644
Pcmt1	Protein-L-isoaspartate(D-aspartate) O-methyltransferase OS=Mus musculus GN=Pcmt1 PE=1 SV=3	7.59	24691.5	2639.42	P23506	7	52.86	0	PIMT_MOUSE	198.327	201.94	173.577	200.63	191.276	177.515	186.001	211.686	171.847	213.232	193.208	190.336	192.465	209.419
Asah1	Acid ceramidase OS=Mus musculus GN=Asah1 PE=1 SV=1	8.53	45068.8	850.669	Q9WV54	10	32.99	0.0024	ASAH1_MOUSE	268.836	192.149	129.172	158.444	185.684	171.092	235.969	206.904	167.623	187.254	218.015	184.513	192.138	209.064
Tmed10	Transmembrane emp24 domain-containing protein 10 OS=Mus musculus GN=Tmed10 PE=2 SV=1	6.25	25081.9	2832.76	Q9D1D4	6	34.7	0	TMEDA_MOUSE	225.945	183.963	136.281	169.591	218.795	199.468	229.687	204.016	132.197	175.876	222.354	202.676	191.738	208.628
Scp2	Non-specific lipid-transfer protein OS=Mus musculus GN=Scp2 PE=1 SV=3	7.19	59753.1	623.005	P32020	4	8.59	0.0024	NLTP_MOUSE	155.33	116.275	205.814	230.873	208.665	205.511	168.797	146.639	206.682	269.579	194.367	190.5	191.586	208.463
Ube2v1	Ubiquitin-conjugating enzyme E2 variant 1 OS=Mus musculus GN=Ube2v1 PE=1 SV=1	8.22	16468.8	5138	Q9CZY3	6	51.02	0	UB2V1_MOUSE	189.25	187.441	185.221	229.772	191.562	176.753	201.665	193.009	175.753	216.649	171.123	172.029	190.852	207.665
Tjp2	Tight junction protein ZO-2 OS=Mus musculus GN=Tjp2 PE=1 SV=2	6.33	131508	187.198	Q9Z0U1	2	2.83	0.003	ZO2_MOUSE	217.236	227.328	157.935	186.018	172.405	220.808	152.118	187.608	152.48	217.12	188.548	200.481	190.007	206.745
Sfxn3	Sideroflexin-3 OS=Mus musculus GN=Sfxn3 PE=1 SV=1	9.78	35691.4	1196.66	Q91V61	9	45.17	0.0024	SFXN3_MOUSE	242.009	273.518	165.865	171.625	168.005	166.926	166.342	280.707	151.379	164.305	120.9	204.763	189.695	206.406
Arf4	ADP-ribosylation factor 4 OS=Mus musculus GN=Arf4 PE=1 SV=2	7.04	20510.7	5788.98	P61750	9	64.44	0	ARF4_MOUSE	236.182	267.823	130.003	161.45	183.839	181.921	205.507	280.136	123.996	152.468	161.852	183.076	189.021	205.673
Ppic	Peptidyl-prolyl cis-trans isomerase C OS=Mus musculus GN=Ppic PE=1 SV=1	7.36	22908.3	1856.48	P30412	7	48.11	0	PPIC_MOUSE	180.083	187.899	173.459	195.914	218.098	188.718	121.581	189.556	173.191	231.236	204.615	201.553	188.825	205.459
Kras	GTPase KRas OS=Mus musculus GN=Kras PE=1 SV=1	6.37	21941	2077.26	P32883	10	65.61	0	RASK_MOUSE	196.131	229.533	120.428	147.774	215.196	216.229	204.41	227.243	125.504	148.103	206.263	218.656	187.956	204.514
Mlec	Malectin OS=Mus musculus GN=Mlec PE=2 SV=2	5.65	32513.2	1848.54	Q6ZQI3	10	38.49	0	MLEC_MOUSE	247.252	207.035	119.452	158.076	199.381	187.847	236.818	226.211	117.72	155.018	199.47	199.335	187.801	204.345
Ncdn	Neurochondrin OS=Mus musculus GN=Ncdn PE=1 SV=1	5.23	80321.1	406.931	Q9Z0E0	7	11.93	0.0024	NCDN_MOUSE	258.886	227.539			129.395	128.531	262.773	200.436			147.86	146.317	187.717	204.254
Rps2	40S ribosomal protein S2 OS=Mus musculus GN=Rps2 PE=2 SV=3	10.65	31516.5	2234.5	P25444	12	47.78	0	RS2_MOUSE	227.854	203.754	136.542	171.274	214.404	195.336	223.316	189.458	129.675	171.617	193.057	189.612	187.158	203.646
Rab14	Ras-related protein Rab-14 OS=Mus musculus GN=Rab14 PE=1 SV=3	5.8	24125.1	5029.94	Q91V41	12	77.67	0	RAB14_MOUSE	238.684	216.775	117.417	158.396	200.332	198.828	232.067	217.33	115.392	158.04	199.298	191.652	187.018	203.493
Pfkl	ATP-dependent 6-phosphofructokinase, liver type OS=Mus musculus GN=Pfkl PE=1 SV=4	6.75	86158.4	629.079	P12382	10	17.18	0.0024	PFKAL_MOUSE	186.777	170.977	144.719	185.55	214.295	205.324	184.691	173.536	144.337	211.422	213.793	202.536	186.496	202.926
Art3	Ecto-ADP-ribosyltransferase 3 OS=Mus musculus GN=Art3 PE=2 SV=2	5.66	42357.1	764.231	Q8R2G4	8	29.92	0.0024	NAR3_MOUSE	231.261	174.864	142.214	168.003	187.356	165.833	213.735	201.281	163.982	191.477	206.545	182.792	185.779	202.144
Sdhb	Succinate dehydrogenase [ubiquinone] iron-sulfur subunit, mitochondrial OS=Mus musculus GN=Sdhb PE=1 SV=1	8.7	32612.4	1427.68	Q9CQA3	8	30.5	0.0024	SDHB_MOUSE	201.694	180.882	162.665	199.111	195.668	195.802	197.359	174.285	154.592	205.548	167.73	183.68	184.918	201.208
Rsu1	Ras suppressor protein 1 OS=Mus musculus GN=Rsu1 PE=2 SV=3	9.33	31550.3	1479.33	Q01730	9	46.21	0.0024	RSU1_MOUSE	127.5	203.391	232.584	284.447	183.035	217.017	111.825	171.017	158.938	160.296	132.264	226.208	184.043	200.256
Ppp2r1b	Serine/threonine-protein phosphatase 2A 65 kDa regulatory subunit A beta isoform OS=Mus musculus GN=Ppp2r1b PE=1 SV=2	4.81	66618.7	616.054	Q7TNP2	7	16.14	0.0024	2AAB_MOUSE	255.614	212.603	170.387	199.187	158.207	161.843	193.066	214.091	142.788	197.32	140.021	158.478	183.634	199.811
Dpysl4	Dihydropyrimidinase-related protein 4 OS=Mus musculus GN=Dpysl4 PE=1 SV=1	6.52	62531.9	806.621	O35098	14	50	0.0024	DPYL4_MOUSE	181.189	165.969	167.485	189.055	211.969	215.811	167.006	169.638	153.737	184.85	195.062	196.221	183.166	199.302
Bdh1	D-beta-hydroxybutyrate dehydrogenase, mitochondrial OS=Mus musculus GN=Bdh1 PE=1 SV=2	9.25	38641.3	1078.74	Q80XN0	9	32.36	0.0024	BDH_MOUSE	164.509	163.523	145.539	230.511	217.366	192.531	205.259	192.434	147.085	223.085	156.733	154.226	182.733	198.831
Echs1	Enoyl-CoA hydratase, mitochondrial OS=Mus musculus GN=Echs1 PE=1 SV=1	8.58	31873.6	3081.42	Q8BH95	11	46.21	0	ECHM_MOUSE	160.759	154.211	179.189	215.031	194.692	211.255	139.802	149.339	173.635	227.052	187.376	198.94	182.607	198.693
Rab2a	Ras-related protein Rab-2A OS=Mus musculus GN=Rab2a PE=1 SV=1	6.08	23718.6	5762.56	P53994	13	70.75	0	RAB2A_MOUSE	226.544	206.332	159.784	172.183	180.837	168.125	207.08	209.6	126.936	156.802	188.26	188.497	182.582	198.666
Arf5	ADP-ribosylation factor 5 OS=Mus musculus GN=Arf5 PE=1 SV=2	6.36	20643.8	6345.61	P84084	10	60.56	0	ARF5_MOUSE	232.094	247.25	125.147	151.106	170.808	174.01	229.566	259.457	124.054	147.151	151.597	178.302	182.545	198.626
Slc3a2	4F2 cell-surface antigen heavy chain OS=Mus musculus GN=Slc3a2 PE=1 SV=1	5.52	58450.7	465.477	P10852	8	19.77	0.0024	4F2_MOUSE	202.347	190.637	153.661	172.925	195.991	194.545	209.747	186.99	159.837	167.156	182.459	172.295	182.382	198.449
Aco1	Cytoplasmic aconitate hydratase OS=Mus musculus GN=Aco1 PE=2 SV=3	7.25	98753.1	212.367	P28271	3	4.95	0.003	ACOC_MOUSE	205.371	193.917	217.555	288.563	171.218	122.042	158.255	139.538	197.009	223.855	152.918	110.738	181.748	197.759
Rala	Ras-related protein Ral-A OS=Mus musculus GN=Rala PE=1 SV=1	6.99	23723.9	3289.61	P63321	7	54.85	0	RALA_MOUSE	187.836	182.237	136.688	147.036	223.911	212.987	150.086	180.562	149.499	163.352	219.379	218.602	181.015	196.961
Cfl2	Cofilin-2 OS=Mus musculus GN=Cfl2 PE=1 SV=1	8.16	18823.7	7401.26	P45591	10	73.49	0	COF2_MOUSE	200.783	204.637	164.321	193.965	181.333	162.564	202.9	204.678	156.49	172.189	151.819	159.402	179.59	195.411
Agps	Alkyldihydroxyacetonephosphate synthase, peroxisomal OS=Mus musculus GN=Agps PE=1 SV=1	7.23	72425	301.907	Q8C0I1	2	5.12	0.003	ADAS_MOUSE	250.426	191.931	178.501	206.506	150.841	152.054	153.007	159.82	177.54	203.046	160.987	151.453	178.009	193.691
Eci1	Enoyl-CoA delta isomerase 1, mitochondrial OS=Mus musculus GN=Eci1 PE=1 SV=2	9.26	32535.7	902.9	P42125	7	37.72	0.0024	ECI1_MOUSE	141.579	127.809	202.754	234.154	175.079	165.297	150.621	142.493	200.358	247.276	165.255	175.564	177.353	192.977
Tpi1	Triosephosphate isomerase OS=Mus musculus GN=Tpi1 PE=1 SV=4	5.43	32705.1	1979.37	P17751	10	49.16	0	TPIS_MOUSE	178.824	159.104	217.054	177.482	171.974	158.676	174.723	163.235	202.698	183.414	170.299	158.36	176.32	191.853
Etfdh	Electron transfer flavoprotein-ubiquinone oxidoreductase, mitochondrial OS=Mus musculus GN=Etfdh PE=1 SV=1	7.29	68946.4	567.991	Q921G7	10	23.54	0.0024	ETFD_MOUSE	154.125	150.055	185.37	222.148	179.875	180.401	158.946	135.396	176.397	219.534	180.438	173.049	176.311	191.843
Ilk	Integrin-linked protein kinase OS=Mus musculus GN=Ilk PE=1 SV=2	8.02	51886.6	1038.95	O55222	10	27.43	0.0024	ILK_MOUSE	164.901	177.395	134.512	173.353	184.731	195.831	195.15	148.618	136.935	197.739	205.689	199.256	176.176	191.696
Rab5a	Ras-related protein Rab-5A OS=Mus musculus GN=Rab5a PE=1 SV=1	8.25	23826.8	5263.5	Q9CQD1	10	72.09	0	RAB5A_MOUSE	158.474	144.211	148.654	177.452	204.496	193.898	181.055	148.635	143.599	171.927	219.628	211.404	175.286	190.728
Des	Desmin OS=Mus musculus GN=Des PE=1 SV=3	5.03	53554.9	2055.56	P31001	6	16.2	0	DESM_MOUSE	170.627	133.707	157.224	185.942	180.524	175.881	205.24	144.741	167.688	201.669	196.807	180.185	175.02	190.438
Mical1	Protein-methionine sulfoxide oxidase MICAL1 OS=Mus musculus GN=Mical1 PE=1 SV=1	5.65	117925	176.965	Q8VDP3	2	3.24	0.003	MICA1_MOUSE	170.004	163.036			184.96	200.923	157.147	170.739		156.992	161.219	208.494	174.835	190.237
Pcbp1	Poly(rC)-binding protein 1 OS=Mus musculus GN=Pcbp1 PE=1 SV=1	6.71	38011.1	1333.4	P60335	11	50.56	0.0024	PCBP1_MOUSE	198.782	199.433	142.972	157.655	185.5	189.484	200.227	194.263	124.869	151.449	170.321	176.566	174.293	189.647
Tcp1	T-complex protein 1 subunit alpha OS=Mus musculus GN=Tcp1 PE=1 SV=3	5.75	60905	819.606	P11983	12	27.52	0.0024	TCPA_MOUSE	142.445	161.213	141.434	186.338	202.782	186.609	157.965	175.37	176.483	195.54	172.072	187.557	173.817	189.129
Dlst	Dihydrolipoyllysine-residue succinyltransferase component of 2-oxoglutarate dehydrogenase complex, mitochondrial OS=Mus musculus GN=Dlst PE=1 SV=1	9.26	49336.8	932.506	Q9D2G2	9	23.57	0.0024	ODO2_MOUSE	178.93	155.049	144.477	168.68	168.639	143.463	165.336	157.006	146.344	189.365	170.679	295.14	173.592	188.885
Pcyox1	Prenylcysteine oxidase OS=Mus musculus GN=Pcyox1 PE=1 SV=1	6.46	56722.9	798.698	Q9CQF9	10	31.68	0.0024	PCYOX_MOUSE	200.279	200.766	132.118	145.591	174.77	150.891	217.503	204.355	131.347	172.893	183.799	168.404	173.56	188.849
Actr1b	Beta-centractin OS=Mus musculus GN=Actr1b PE=1 SV=1	5.96	42395.5	1480.22	Q8R5C5	11	52.13	0.0024	ACTY_MOUSE	158.412	175.409	162.603	167.324	147.262	152.549	247.128	197.329	202.925	160.73	147.329	161.14	173.345	188.615
Ddx1	ATP-dependent RNA helicase DDX1 OS=Mus musculus GN=Ddx1 PE=1 SV=1	6.81	83526.8	326.227	Q91VR5	4	8.78	0.0024	DDX1_MOUSE	185.829	156.813	183.914	213.972	204.949	154.773	122.653	149.049	180.753	140.284	155.799	221.398	172.516	187.713
Cntf	Ciliary neurotrophic factor OS=Mus musculus GN=Cntf PE=2 SV=1	6.05	22643.8	4823.23	P51642	9	53.54	0	CNTF_MOUSE	154.789	149.957	167.332	182.541	200.339	190.185	149.55	151.119	163.298	188.664	181.536	188.97	172.357	187.54
Itgav	Integrin alpha-V OS=Mus musculus GN=Itgav PE=1 SV=2	5.27	116444	262.437	P43406	5	6.32	0.003	ITAV_MOUSE	174.916	174.951	141.954	183.428	183.894	184.361	172.897	194.443	118.968		174.885	188.176	172.079	187.238
Cntn1	Contactin-1 OS=Mus musculus GN=Cntn1 PE=1 SV=1	5.73	114244	219.353	P12960	5	6.08	0.003	CNTN1_MOUSE	181.844	179.857	154.561	174.603	172.118	159.046	172.347	184.939	148.205	195.306	151.916	182.532	171.44	186.542
Cdh1	Cadherin-1 OS=Mus musculus GN=Cdh1 PE=1 SV=1	4.5	98769.2	257.733	P09803	3	7.47	0.003	CADH1_MOUSE	144.923	181.691	166.085	167.172	192.932	187.628	150.94	164.089	200.56	150.208	163.039	184.945	171.184	186.265
Arhgdia	Rho GDP-dissociation inhibitor 1 OS=Mus musculus GN=Arhgdia PE=1 SV=3	4.91	23464.5	5230.48	Q99PT1	5	40.69	0	GDIR1_MOUSE	234.364	196.925	95.4534	107.266	189.779	194.138	217.968	226.992	90.8721	112.7	188.378	190.412	170.437	185.452
Rpl7a	60S ribosomal protein L7a OS=Mus musculus GN=Rpl7a PE=1 SV=2	11.01	30147.7	1719.02	P12970	8	34.21	0.0024	RL7A_MOUSE	194.224	179.953	114.417	141.481	204.001	184.575	191.538	185.347	109.993	141.541	201.87	192.531	170.123	185.109
Rpl18	60S ribosomal protein L18 OS=Mus musculus GN=Rpl18 PE=2 SV=3	12.19	21701.6	2210.1	P35980	5	28.19	0	RL18_MOUSE	192.327	182.682	123.34	138.328	208.143	202.812	184.381	169.48	124.913	144.822	191.543	177.138	169.992	184.967
Pa2g4	Proliferation-associated protein 2G4 OS=Mus musculus GN=Pa2g4 PE=1 SV=3	6.42	44041.1	754.533	P50580	11	33.76	0.0024	PA2G4_MOUSE	180.418	199.606	142.66	176.139	170.432	172.446	202.552	162.319	157.624	147.64	156.416	157.499	168.813	183.684
Tmed4	Transmembrane emp24 domain-containing protein 4 OS=Mus musculus GN=Tmed4 PE=2 SV=1	8.31	26250.1	1752.27	Q8R1V4	6	38.33	0	TMED4_MOUSE	248.867	232.963	139.423	163.501	141.189	152.603	215.962	213.003	120.645	155.512	108.069	122.827	167.88	182.67
Cyb5b	Cytochrome b5 type B OS=Mus musculus GN=Cyb5b PE=1 SV=1	4.6	16375.1	2552.49	Q9CQX2	3	42.47	0	CYB5B_MOUSE	199.938	180.316	150.546	165.106	193.131	176.532	187.285	165.379	123.45	144.957	149.958	162.588	166.599	181.275
Casq1	Calsequestrin-1 OS=Mus musculus GN=Casq1 PE=1 SV=3	3.75	46378	546.134	O09165	5	23.7	0.0024	CASQ1_MOUSE			60.0295		234.22	217.193			81.8301	86.7176	252.252	233.895	166.591	181.266
Ndufs3	NADH dehydrogenase [ubiquinone] iron-sulfur protein 3, mitochondrial OS=Mus musculus GN=Ndufs3 PE=1 SV=2	6.77	30320.4	1642.53	Q9DCT2	9	41.06	0.0024	NDUS3_MOUSE	186.147	168.875	130.909	166.78	176.166	172.755	174.447	183.243	120.087	167.992	170.526	180.766	166.558	181.23
Dars	Aspartate--tRNA ligase, cytoplasmic OS=Mus musculus GN=Dars PE=2 SV=2	6.04	57603.6	557.945	Q922B2	10	24.15	0.0024	SYDC_MOUSE	116.86	169.78	101.42	114.991	154.339	265.73	126.095	100.831	176.777	246.361	149.88	269.824	166.074	180.704
Arpc2	Actin-related protein 2/3 complex subunit 2 OS=Mus musculus GN=Arpc2 PE=1 SV=3	6.98	34471.2	1115.08	Q9CVB6	13	65.33	0.0024	ARPC2_MOUSE	191.91	177.705	142.407	180.234	169.318	165.53	161.538	191.207	123.118	173.356	155.451	157.963	165.812	180.418
Map2k4	Dual specificity mitogen-activated protein kinase kinase 4 OS=Mus musculus GN=Map2k4 PE=1 SV=2	8.06	44569.9	537.757	P47809	6	24.43	0.0024	MP2K4_MOUSE	132.088	121.723	128.25	204.056	205.757	198.549	123.982	134.843	135.181	201.572	200.169	203.444	165.801	180.407
Cpt1a	Carnitine O-palmitoyltransferase 1, liver isoform OS=Mus musculus GN=Cpt1a PE=1 SV=4	8.68	88993	291.714	P97742	3	4.92	0.003	CPT1A_MOUSE	192.281	188.866	150.824	163.642	181.444	169.644	179.895	186.981	121.469	122.177	166.406	162.154	165.482	180.06
Ube2n	Ubiquitin-conjugating enzyme E2 N OS=Mus musculus GN=Ube2n PE=1 SV=1	6.15	17194.9	5547.6	P61089	5	52.63	0	UBE2N_MOUSE	181.184	222.153	120.366	133.099	129.025	159.536	173.059	227.907	128.394	165.193	151.663	186.251	164.819	179.339
Pdia4	Protein disulfide-isomerase A4 OS=Mus musculus GN=Pdia4 PE=1 SV=3	4.99	72324.7	239.336	P08003	5	11.6	0.003	PDIA4_MOUSE	183.178	166.089	128.767	146.084	180.911	174.081	175.732	161.034	130.657	146.767	179.931	186.802	163.336	177.725
Gna11	Guanine nucleotide-binding protein subunit alpha-11 OS=Mus musculus GN=Gna11 PE=1 SV=1	5.6	42309.4	1438.88	P21278	14	50.7	0.0024	GNA11_MOUSE	147.176	237.789	170.889	115.857	118.181	192.847	140.764	220.189	158.584	124.366	115.038	215.846	163.127	177.497
Rpl6	60S ribosomal protein L6 OS=Mus musculus GN=Rpl6 PE=1 SV=3	11.13	33566.7	1861.52	P47911	9	32.43	0	RL6_MOUSE	195.838	188.516	125.397	157.664	183.097	165.614	178.474	176.886	112.006	142.499	162.943	161.341	162.523	176.84
Ndufa8	NADH dehydrogenase [ubiquinone] 1 alpha subcomplex subunit 8 OS=Mus musculus GN=Ndufa8 PE=1 SV=3	8.48	20448.3	1002.58	Q9DCJ5	6	49.42	0.0024	NDUA8_MOUSE	188.363	177.52	149.777	155.494	177.685	170.696	174.936	150.01	127.59	148.631	155.775	158.402	161.24	175.444
Psmb6	Proteasome subunit beta type-6 OS=Mus musculus GN=Psmb6 PE=1 SV=3	4.78	25606.9	437.344	Q60692	5	34.45	0.0024	PSB6_MOUSE	170.116	168.027	157.375	187.316	136.585	146.035	156.076	167.783	148.998	204.743	141.084	149.301	161.12	175.313
Snta1	Alpha-1-syntrophin OS=Mus musculus GN=Snta1 PE=1 SV=1	6.41	54121.3	370.547	Q61234	6	15.71	0.0024	SNTA1_MOUSE	201.09	174.143	102.305	162.184	173.852	164.704	183.193	183.716	103.593	165.88	162.675	154.126	160.955	175.134
Mdh1	Malate dehydrogenase, cytoplasmic OS=Mus musculus GN=Mdh1 PE=1 SV=3	6.15	36682.3	1324.94	P14152	6	27.84	0.0024	MDHC_MOUSE	196.281	191.336	140.863	129.619	153.037	151.03	168.361	181.569	138.092	169.799	145.795	161.354	160.595	174.742
Jam3	Junctional adhesion molecule C OS=Mus musculus GN=Jam3 PE=1 SV=2	6.64	35407.9	2035.97	Q9D8B7	11	45.81	0	JAM3_MOUSE	151.746	147.982	165.321	181.074	157.399	155.029	143.919	153.19	157.07	199.099	154.679	160.581	160.591	174.738
	Ig kappa chain C region OS=Mus musculus PE=1 SV=1	5.07	11949	5454.64	P01837	5	63.21	0	IGKC_MOUSE	146.466	108.429	179.673	217.61	131.945	154.662	96.1235	135.001	220.917	219.696	138.892	165.639	159.588	173.646
Pxn	Paxillin OS=Mus musculus GN=Pxn PE=1 SV=1	5.61	65902.1	431.334	Q8VI36	5	18.78	0.0024	PAXI_MOUSE	182.881	237.96	81.4879		146.24	161.35	183.962	237.16	79.003	123.884	132.877	185.191	159.272	173.303
Alad	Delta-aminolevulinic acid dehydratase OS=Mus musculus GN=Alad PE=1 SV=1	6.33	36479.8	1682.59	P10518	11	51.52	0.0024	HEM2_MOUSE	170.188	157.584	156.986	163.762	151.495	146.598	166	185.264	150.007	144.514	157.87	158.454	159.06	173.072
Sucla2	Succinyl-CoA ligase [ADP-forming] subunit beta, mitochondrial OS=Mus musculus GN=Sucla2 PE=1 SV=2	6.62	50456.2	542.82	Q9Z2I9	8	22.25	0.0024	SUCB1_MOUSE	168.405	143.855	128.049	183.309	180.286	175.624	159.2	138.441	123.426	164.274	174.574	164.832	158.69	172.669
Aoc3	Membrane primary amine oxidase OS=Mus musculus GN=Aoc3 PE=2 SV=3	5.94	85161	236.296	O70423	3	9.02	0.003	AOC3_MOUSE	188.042	164.554	129.263	134.718	166.466	191.758	155.54	175.911	146.939	132.892	169.912	140.091	158.007	171.926
Hsd17b10	3-hydroxyacyl-CoA dehydrogenase type-2 OS=Mus musculus GN=Hsd17b10 PE=1 SV=4	8.78	27532.7	1806.31	O08756	8	53.64	0	HCD2_MOUSE	164.133	148.17	156.468	174.578	153.193	134.861	179.418	161.789	146.293	160.318	143.475	173.08	157.981	171.898
Acot7	Cytosolic acyl coenzyme A thioester hydrolase OS=Mus musculus GN=Acot7 PE=1 SV=2	8.79	42993.2	409.914	Q91V12	5	18.37	0.0024	BACH_MOUSE	196.182	177.974	170.641	190.014	109.177	109.133	184.277	169.195	149.972	219.382	110.797	106.144	157.741	171.637
Marc2	Mitochondrial amidoxime reducing component 2 OS=Mus musculus GN=Marc2 PE=1 SV=1	8.73	38821.7	1395.83	Q922Q1	12	35.8	0.0024	MARC2_MOUSE	186.714	184.33	103.438	167.387	158.784	172.189	176.585	156.621	101.768	159.883	160.366	163.794	157.655	171.543
Bin1	Myc box-dependent-interacting protein 1 OS=Mus musculus GN=Bin1 PE=1 SV=1	4.77	64698.4	291.847	O08539	2	5.95	0.003	BIN1_MOUSE	123.813	126.999	117.564	162.006	214.917	220.275	106.085	143.939	123.287	149.683	187.334	211.59	157.291	171.147
Stt3a	Dolichyl-diphosphooligosaccharide--protein glycosyltransferase subunit STT3A OS=Mus musculus GN=Stt3a PE=1 SV=1	8.06	81168.1	236.733	P46978	3	4.11	0.003	STT3A_MOUSE	176.7	149.643	109.926	186.047	142.099	123.132	213.293	216.742		116.624	148.304	146.765	157.207	171.056
Atp6v1e1	V-type proton ATPase subunit E 1 OS=Mus musculus GN=Atp6v1e1 PE=1 SV=2	8.89	26214.5	1443.71	P50518	8	40.71	0.0024	VATE1_MOUSE	164.645	148.468	147.332	159.358	160.749	159.744	162.647	145.39	138.407	162.794	156.868	166.436	156.07	169.819
Dstn	Destrin OS=Mus musculus GN=Dstn PE=1 SV=3	7.99	18863.8	4308.01	Q9R0P5	12	70.3	0	DEST_MOUSE	163.88	180.116	167.33	192.695	127.463	127.365	173.563	187.344	147.53	155.377	117.638	131.883	156.015	169.759
Idh3g	Isocitrate dehydrogenase [NAD] subunit gamma 1, mitochondrial OS=Mus musculus GN=Idh3g PE=1 SV=1	9.25	43184.7	713.694	P70404	9	39.69	0.0024	IDHG1_MOUSE	154.705	155.146	149.468	188.934	148.747	146.815	145.756	155.652	129.209	191.503	155.51	150.555	156	169.742
Eef1g	Elongation factor 1-gamma OS=Mus musculus GN=Eef1g PE=1 SV=3	6.3	50403	666.487	Q9D8N0	11	43.48	0.0024	EF1G_MOUSE	181.223	243.788	92.8057	132.846	168.961	174.285	195.038	171.415	97.65	115.342	144.85	149.461	155.639	169.349
Tm9sf3	Transmembrane 9 superfamily member 3 OS=Mus musculus GN=Tm9sf3 PE=1 SV=1	6.85	68286.3	175.109	Q9ET30	2	6.3	0.003	TM9S3_MOUSE	130.555	154.631	177.773	139.897	151.761	174.058	161.427	173.704	127.577	120.737	170.139	183.347	155.467	169.163
Serpina1d	Alpha-1-antitrypsin 1-4 OS=Mus musculus GN=Serpina1d PE=2 SV=1	5.11	46169.5	291.363	Q00897	4	11.62	0.003	A1AT4_MOUSE	161.475	145.084	176.114	204.206	144.165	140.84	143.127	135.701	170.145	168.814	134.196	139.018	155.24	168.916
Camk2d	Calcium/calmodulin-dependent protein kinase type II subunit delta OS=Mus musculus GN=Camk2d PE=1 SV=1	6.85	56996.8	771.503	Q6PHZ2	10	28.46	0.0024	KCC2D_MOUSE	175.223	150.882	133.153	130.57	170.498	165.549	151.802	143.924	130.359	170.039	167.647	168.683	154.861	168.503
Apool	MICOS complex subunit Mic27 OS=Mus musculus GN=Apool PE=2 SV=1	9.64	29374.8	453.051	Q78IK4	3	19.62	0.0024	MIC27_MOUSE	149.77	134.873	160.326	161.672	211.346	173.583	152.504	97.3047	118.579	131.153	194.558	162.484	154.013	167.58
Dnm1l	Dynamin-1-like protein OS=Mus musculus GN=Dnm1l PE=1 SV=2	6.63	83171.4	280.986	Q8K1M6	7	14.69	0.003	DNM1L_MOUSE	148.232	131.517	110.107	149.344	178.799	163.784	163.981	171.821	114.436	120.763	200.151	194.154	153.924	167.484
Rpl14	60S ribosomal protein L14 OS=Mus musculus GN=Rpl14 PE=1 SV=3	11.48	23678.2	1230.2	Q9CR57	2	10.6	0.0024	RL14_MOUSE	164.863	153.553	103.901	151.665	188.088	175.097	165.645	153.101	109.912	136.195	170.717	169.782	153.543	167.069
Rps3	40S ribosomal protein S3 OS=Mus musculus GN=Rps3 PE=1 SV=1	10.04	26845.4	3242.01	P62908	14	62.55	0	RS3_MOUSE	169.121	169.62	106.101	135.593	172.143	168.915	158.203	172.657	113.926	123.996	172.706	168.562	152.628	166.074
Eno2	Gamma-enolase OS=Mus musculus GN=Eno2 PE=1 SV=2	4.8	47638.9	15094.5	P17183	12	41.71	0	ENOG_MOUSE	156.117	110.107	141.122	181.374	151.633	152.945	174.742	152.802	143.769	172.571	138.919	144.82	151.743	165.111
Ndufa9	NADH dehydrogenase [ubiquinone] 1 alpha subcomplex subunit 9, mitochondrial OS=Mus musculus GN=Ndufa9 PE=1 SV=2	10.06	42639.3	1297.82	Q9DC69	15	51.72	0.0024	NDUA9_MOUSE	182.067	162.309	126.033	141.518	147.923	140.398	193.645	160.356	123.402	146.653	151.071	139.847	151.269	164.594
Dnpep	Aspartyl aminopeptidase OS=Mus musculus GN=Dnpep PE=2 SV=2	6.85	52777.2	904.272	Q9Z2W0	5	17.34	0.0024	DNPEP_MOUSE	133.363	131.202	133.265	163.691	165.248	166.191	150.09	145.981	130.251	151.528	165.364	178.759	151.244	164.568
Capza2	F-actin-capping protein subunit alpha-2 OS=Mus musculus GN=Capza2 PE=1 SV=3	5.47	33138.2	1555.07	P47754	9	52.8	0.0024	CAZA2_MOUSE	164.237	176.509	131.363	137.611	137.4	142.175	178.463	168.265	142.767	158.488	136.797	140.738	151.234	164.557
Rab1b	Ras-related protein Rab-1B OS=Mus musculus GN=Rab1b PE=1 SV=1	5.39	22358.3	5310.49	Q9D1G1	9	60.7	0	RAB1B_MOUSE	172.523	154.542	121.743	122.255	166.764	158.972	174.092	141.516	118.899	147.465	169.706	164.442	151.076	164.385
Rab5b	Ras-related protein Rab-5B OS=Mus musculus GN=Rab5b PE=1 SV=1	8.24	23935	3813.45	P61021	8	52.56	0	RAB5B_MOUSE	161.668	144.37	126.39	146.335	165.848	152.193	171.684	137.235	117.904	152.934	175.712	157.558	150.819	164.105
Cpne6	Copine-6 OS=Mus musculus GN=Cpne6 PE=2 SV=1	5.23	62636.4	455.726	Q9Z140	11	28.9	0.0024	CPNE6_MOUSE	194.744	195.237	116.572	125.559	131.48	128.66	188.981	193.041	118.606	142.159	136.772	137.133	150.745	164.025
Pitpna	Phosphatidylinositol transfer protein alpha isoform OS=Mus musculus GN=Pitpna PE=1 SV=2	5.93	32121.6	1447.39	P53810	7	29.89	0.0024	PIPNA_MOUSE	278.365	262.353	65.2564	82.4381	122.164	117.584	234.238	228.374	71.3777	92.2896	135.69	110.792	150.077	163.298
Otub1	Ubiquitin thioesterase OTUB1 OS=Mus musculus GN=Otub1 PE=1 SV=2	4.66	31498.2	2641.84	Q7TQI3	13	68.27	0	OTUB1_MOUSE	257.094	237.814	65.2857	70.8005	151.711	152.675	230.333	213.857	68.8929	54.6567	144.766	147.992	149.657	162.84
Decr1	2,4-dienoyl-CoA reductase, mitochondrial OS=Mus musculus GN=Decr1 PE=1 SV=1	9.29	36499	735.884	Q9CQ62	6	28.36	0.0024	DECR_MOUSE	126.689	155.603	156.254	169.613	164.597	154.559	127.133	127.355	133.403	177.527	154.221	145.26	149.351	162.508
Cyp51a1	Lanosterol 14-alpha demethylase OS=Mus musculus GN=Cyp51a1 PE=2 SV=1	8.47	57175	429.523	Q8K0C4	9	24.45	0.0024	CP51A_MOUSE	155.119	268.515	158.57	120.351	121.51	199.035	119.443	157.726	75.7468	95.8935	139.853	180.393	149.346	162.503
Rps6ka3	Ribosomal protein S6 kinase alpha-3 OS=Mus musculus GN=Rps6ka3 PE=1 SV=2	6.42	84036.2	313.698	P18654	4	7.57	0.003	KS6A3_MOUSE	130.182	121.649	134.584	193.526	164.116	158.789	142.429	119.736	125.21	155.469	163.419	172.745	148.488	161.569
Sec61a1	Protein transport protein Sec61 subunit alpha isoform 1 OS=Mus musculus GN=Sec61a1 PE=2 SV=2	8.05	52721.1	225.735	P61620	2	6.51	0.003	S61A1_MOUSE	153.042	133.367	105.924	171.005	171.145	157.106	141.862	136.894	114.709	123.862	195.003	171.89	147.984	161.02
Copg2	Coatomer subunit gamma-2 OS=Mus musculus GN=Copg2 PE=2 SV=1	5.44	98878.3	364.128	Q9QXK3	3	3.9	0.0024	COPG2_MOUSE	187.582	131.265	126.807	160.65	124.563	130.959	135.798	178.598	134.748	156.593	157.798	131.926	146.441	159.341
Arcn1	Coatomer subunit delta OS=Mus musculus GN=Arcn1 PE=1 SV=2	5.81	57685.7	353.827	Q5XJY5	6	15.66	0.0024	COPD_MOUSE	177.886	143.777	112.756	131.409	164.694	140.751	157.991	145.014	116.05	143.118	153.517	163.736	145.892	158.744
Rps4x	40S ribosomal protein S4, X isoform OS=Mus musculus GN=Rps4x PE=2 SV=2	10.59	29825.9	2504.32	P62702	8	32.7	0	RS4X_MOUSE	155.153	130.127	113.092	134.282	170.676	150.329	164.133	162.684	114.058	135.281	171.069	148.609	145.791	158.634
Rpl8	60S ribosomal protein L8 OS=Mus musculus GN=Rpl8 PE=1 SV=2	11.45	28252.8	1313.93	P62918	6	35.8	0.0024	RL8_MOUSE	165.218	150.245	109.491	118.565	165.857	170.71	161.156	138.796	114.816	124.373	159.413	164.116	145.23	158.023
Rars	Arginine--tRNA ligase, cytoplasmic OS=Mus musculus GN=Rars PE=2 SV=2	7.37	76472.1	189.915	Q9D0I9	2	3.94	0.003	SYRC_MOUSE	157.98	140.133	106.95	140.285	178.34	165.071	144.188	108.796	87.6393	158.011	172.908	176.059	144.697	157.444
Cldn19	Claudin-19 OS=Mus musculus GN=Cldn19 PE=1 SV=3	8.17	23742.4	454.426	Q9ET38	2	22.32	0.0024	CLD19_MOUSE	162.845	142.929	107.021	126.692	123.454	144.662	176.83	142.467	121.908	181.141	154.794	151.562	144.692	157.438
Rpl13	60S ribosomal protein L13 OS=Mus musculus GN=Rpl13 PE=2 SV=3	11.95	24362.5	1814.78	P47963	4	18.01	0	RL13_MOUSE	152.931	154.037	127.318	103.957	176.994	171.336	155.469	145.515	116.326	115.112	155.415	160.313	144.56	157.295
Rps10	40S ribosomal protein S10 OS=Mus musculus GN=Rps10 PE=1 SV=1	10.51	18915.8	2103.36	P63325	2	13.94	0	RS10_MOUSE	178.591	140.303	90.7162	118.265	169.483	141.935	182.881	139.156	109.204	129.161	165.734	164.376	144.15	156.849
Cfb	Complement factor B OS=Mus musculus GN=Cfb PE=1 SV=2	7.08	86373.3	249.373	P04186	5	8.8	0.003	CFAB_MOUSE	119.155	121.711	174.379	164.14	144.644	143.484	123.444	106.963	148.412	173.634	161.773	147.903	144.137	156.834
Dlg1	Disks large homolog 1 OS=Mus musculus GN=Dlg1 PE=1 SV=1	5.43	100519	203.393	Q811D0	3	5.86	0.003	DLG1_MOUSE	144.874	150.133	128.005	147.055	164.816	144.143	130.749	141.368	132.629	146.325	161.95	134.486	143.878	156.553
Ech1	Delta(3,5)-Delta(2,4)-dienoyl-CoA isomerase, mitochondrial OS=Mus musculus GN=Ech1 PE=1 SV=1	7.65	36460.7	996.453	O35459	9	43.12	0.0024	ECH1_MOUSE	140.432	126.787	149.567	172.66	142.196	137.45	127.74	135.251	149.92	160.15	136.771	142.969	143.491	156.132
Dhcr7	7-dehydrocholesterol reductase OS=Mus musculus GN=Dhcr7 PE=2 SV=1	8.3	54660.2	408.261	O88455	3	9.98	0.0024	DHCR7_MOUSE	157.573	144.133	129.784	179.565	140.452	129.205	148.947	143.634	125.725	143.746	141.2	137.496	143.455	156.092
Slc25a10	Mitochondrial dicarboxylate carrier OS=Mus musculus GN=Slc25a10 PE=1 SV=2	9.53	32171.2	1193.27	Q9QZD8	6	35.19	0.0024	DIC_MOUSE	162.517	130.84	119.788	134.819	173.241	157.177	94.2075	147.435	124.361	142.639	169.316	161.68	143.168	155.78
Lpp	Lipoma-preferred partner homolog OS=Mus musculus GN=Lpp PE=1 SV=1	7.07	67430.5	397.871	Q8BFW7	7	22.02	0.0024	LPP_MOUSE	233.499	265.305	104.504	152.251	117.169	117.198	124.604	125.632	85.889	137.329	121.358	132.114	143.071	155.675
Sparc	SPARC OS=Mus musculus GN=Sparc PE=1 SV=1	4.58	35305.5	944.119	P07214	5	21.19	0.0024	SPRC_MOUSE	158.863	180.416	123.198	134.114	135.3	138.451	151.187	168.447	114.098	134.313	135.891	134.873	142.429	154.976
Far1	Fatty acyl-CoA reductase 1 OS=Mus musculus GN=Far1 PE=1 SV=1	9.4	59777.1	1044.59	Q922J9	8	22.91	0.0024	FACR1_MOUSE	145.06	161.12	86.2612	99.6968	205.279	181.034	159.441	147.517	119.119	104.986	151.895	143.155	142.047	154.56
Cd82	CD82 antigen OS=Mus musculus GN=Cd82 PE=1 SV=1	4.76	30312.9	527.982	P40237	4	16.17	0.0024	CD82_MOUSE	153.269	142.419	120.298	130.747	175.55	153.117	156.695	131.448	113.251	136.945	137.559	150.961	141.855	154.351
Pdia6	Protein disulfide-isomerase A6 OS=Mus musculus GN=Pdia6 PE=1 SV=3	4.81	48499.6	1046.98	Q922R8	6	21.14	0.0024	PDIA6_MOUSE	143.406	161.923	118.407	140.376	157.179	143.335	143.69	186.681	92.941	105.269	130.606	178.311	141.844	154.339
Lrrc59	Leucine-rich repeat-containing protein 59 OS=Mus musculus GN=Lrrc59 PE=1 SV=1	9.97	35333.6	1056.13	Q922Q8	8	36.48	0.0024	LRC59_MOUSE	164.353	140.29	103.905	129.374	158.682	149.756	176.663	135.344	113.057	116.826	148.21	156.012	141.039	153.464
Ahsa1	Activator of 90 kDa heat shock protein ATPase homolog 1 OS=Mus musculus GN=Ahsa1 PE=2 SV=2	5.25	38345.3	806.953	Q8BK64	9	39.05	0.0024	AHSA1_MOUSE	220.821	204.264	70.3458	108.316	119.552	111.274	227.831	204.07	76.3429	95.873	129.021	118.546	140.522	152.901
Calu	Calumenin OS=Mus musculus GN=Calu PE=1 SV=1	4.3	37177.8	1285.73	O35887	10	40.95	0.0024	CALU_MOUSE	147.685	196.219	105.969	118.216	137.415	131.067	151.654	213.722	107.838	114.865	129.613	130.79	140.421	152.791
S100b	Protein S100-B OS=Mus musculus GN=S100b PE=2 SV=2	4.28	10842.1	4063.76	P50114	3	40.22	0	S100B_MOUSE	123.85	211.003	138.605	174.965	133.05	115.352	78.0066	208.124	123.423	133.693	112.749	129.66	140.207	152.558
Suclg1	Succinyl-CoA ligase [ADP/GDP-forming] subunit alpha, mitochondrial OS=Mus musculus GN=Suclg1 PE=1 SV=4	9.75	36497	1014.2	Q9WUM5	5	21.1	0.0024	SUCA_MOUSE	110.929	105.446	140.736	152.039	164.99	149.19	116.528	111.049	134.884	167.62	149.471	177.575	140.038	152.375
Rps8	40S ribosomal protein S8 OS=Mus musculus GN=Rps8 PE=1 SV=2	10.72	24490.3	1671.77	P62242	7	42.31	0.0024	RS8_MOUSE	172.166	174.184	115.667	141.084	124.982	140.74	149.202	171.873	115.488	99.672	105.914	165.507	139.707	152.014
Dync1li2	Cytoplasmic dynein 1 light intermediate chain 2 OS=Mus musculus GN=Dync1li2 PE=1 SV=2	5.84	54503.7	808.8	Q6PDL0	10	28.66	0.0024	DC1L2_MOUSE	154.958	153.736	109.208	135.857	140.03	143.127	128.393	167.692	117.33	146.547	131.534	143.557	139.331	151.605
Ube2l3	Ubiquitin-conjugating enzyme E2 L3 OS=Mus musculus GN=Ube2l3 PE=2 SV=1	8.8	18032.7	3487.34	P68037	6	63.64	0	UB2L3_MOUSE	132.374	191.233	153.937	176.636	82.1931	90.2215	119.346	205.849	150.205	190.95	81.7286	96.8104	139.29	151.561
Abce1	ATP-binding cassette sub-family E member 1 OS=Mus musculus GN=Abce1 PE=2 SV=1	8.31	68283.9	343.955	P61222	4	9.02	0.0024	ABCE1_MOUSE	144.015	113.309	143.736	139.06	139.835	148.764	147.875	118.783	118.768	184.44	136.449	136.07	139.259	151.527
Tubb1	Tubulin beta-1 chain OS=Mus musculus GN=Tubb1 PE=1 SV=1	4.78	51125.4	2315.24	A2AQ07	8	18.4	0	TBB1_MOUSE	122.543	235.089	147.813	154.87	107.812	117.457	138.753	122.002	131.002	158.125	126.14	108.213	139.152	151.41
Gmfb	Glia maturation factor beta OS=Mus musculus GN=Gmfb PE=1 SV=3	4.89	16894.2	1242.53	Q9CQI3	4	35.21	0.0024	GMFB_MOUSE	74.7179	102.518	145.463	59.9046	193.192	188.572	62.0784	99.8455	206.462	177.268	171.662	186.303	138.999	151.244
Rab11b	Ras-related protein Rab-11B OS=Mus musculus GN=Rab11b PE=1 SV=3	5.55	24603.6	2427.83	P46638	8	43.58	0	RB11B_MOUSE	155.808	141.596	105.838	128.704	135.351	142.707	156.996	155.622	107.339	130.916	145.535	145.196	137.634	149.759
Hras	GTPase HRas OS=Mus musculus GN=Hras PE=1 SV=2	4.98	21640.3	1588.94	Q61411	7	53.97	0.0024	RASH_MOUSE	146.038	188.974	65.3674	166.342	140.373	166.702	150.794	191.525	37.8636	165.487	113.058	114.587	137.259	149.351
Atp6v1h	V-type proton ATPase subunit H OS=Mus musculus GN=Atp6v1h PE=1 SV=1	6.17	56311.3	443.196	Q8BVE3	8	25.47	0.0024	VATH_MOUSE	162.496	142.955	121.687	164.502	135.067	131.372	101.249	152.816	145.9	117.583	121.103	146.548	136.94	149.003
Alcam	CD166 antigen OS=Mus musculus GN=Alcam PE=1 SV=3	5.76	65776.5	223.594	Q61490	5	14.75	0.003	CD166_MOUSE	113.551	107.162	205.028	255.495	108.095	87.6755	115.323	95.3514	194.534	206.198	76.1158	72.3509	136.407	148.423
Plin1	Perilipin-1 OS=Mus musculus GN=Plin1 PE=1 SV=2	6.58	55938.1	638.67	Q8CGN5	8	22.44	0.0024	PLIN1_MOUSE	121.2	112.912	131.629	129.436	154.809	158.483	132.946	119.552	116.959	138.926	154.965	160.709	136.044	148.028
Ina	Alpha-internexin OS=Mus musculus GN=Ina PE=1 SV=3	5.18	55553.7	3699.43	P46660	19	38.72	0	AINX_MOUSE	154.379	159.573	96.0038	137.406	147.684	149.774	147.612	139.576	100.186	124.703	135.887	135.965	135.729	147.686
Cmtm6	CKLF-like MARVEL transmembrane domain-containing protein 6 OS=Mus musculus GN=Cmtm6 PE=2 SV=1	5.88	20223.5	1506.76	Q9CZ69	2	11.48	0.0024	CKLF6_MOUSE	106.852	200.623	175.354	179.756	121.31	113.937	96.3579	149.278	113.736	134.927	114.4	120.317	135.571	147.513
Atl3	Atlastin-3 OS=Mus musculus GN=Atl3 PE=2 SV=1	5.67	61031.4	265.678	Q91YH5	2	7.21	0.003	ATLA3_MOUSE	138.515	113.572		102.008	139.592	131.983	144.911	131.649	147.559	163.581	136.044	138.755	135.288	147.206
Rab43	Ras-related protein Rab-43 OS=Mus musculus GN=Rab43 PE=1 SV=1	5.46	23491.4	1521.67	Q8CG50	2	9.52	0.0024	RAB43_MOUSE	127.223	74.951	176.739	220.331	128.149	151.985	57.403	54.103	152.136	220.851	129.625	126.525	135.002	146.894
Ppp1cb	Serine/threonine-protein phosphatase PP1-beta catalytic subunit OS=Mus musculus GN=Ppp1cb PE=1 SV=3	5.77	37985.3	1109.46	P62141	11	47.71	0.0024	PP1B_MOUSE	139.076	113.071	143.88	167.414	141.682	134.494	136.132	123.885	123.13	135.756	126.716	134.097	134.944	146.832
Lamp2	Lysosome-associated membrane glycoprotein 2 OS=Mus musculus GN=Lamp2 PE=2 SV=2	7.14	46194.4	557.056	P17047	3	6.51	0.0024	LAMP2_MOUSE	165.867	153.496	106.715	116.057	135.856	126.311	154.432	141.024	123.423	125.996	132.938	130.974	134.424	146.266
Cd36	Platelet glycoprotein 4 OS=Mus musculus GN=Cd36 PE=1 SV=2	8.37	53268.4	502.769	Q08857	7	24.58	0.0024	CD36_MOUSE	98.8703	106.974	134.827	129.868	139.715	151.858	105.171	125.061	143.291	159.244	148.659	163.648	133.932	145.731
Camk2g	Calcium/calmodulin-dependent protein kinase type II subunit gamma OS=Mus musculus GN=Camk2g PE=1 SV=1	7.3	60291.3	547.899	Q923T9	7	18.15	0.0024	KCC2G_MOUSE	144.867	135.972	109.608	128.951	142.467	136.431	145.281	132.957	111.74	130.518	136.152	143.401	133.195	144.929
Bag5	BAG family molecular chaperone regulator 5 OS=Mus musculus GN=Bag5 PE=1 SV=1	5.67	51512.9	270.286	Q8CI32	5	15.88	0.003	BAG5_MOUSE	128.771	121.875	116.033	129.656	157.674	150.176	129.801	108.646	104.509	138.942	154.03	144.641	132.063	143.697
Sccpdh	Saccharopine dehydrogenase-like oxidoreductase OS=Mus musculus GN=Sccpdh PE=2 SV=1	8.67	47699.7	829.976	Q8R127	10	44.99	0.0024	SCPDL_MOUSE	155.671	136.681	101.958	125.684	146.657	169.705	131.786	142.813	105.472	101.744	114.673	151.817	132.055	143.688
Tomm40	Mitochondrial import receptor subunit TOM40 homolog OS=Mus musculus GN=Tomm40 PE=1 SV=3	7.63	38294.4	224.055	Q9QYA2	2	6.93	0.003	TOM40_MOUSE	183.182	137.911	126.358	212.457	80.5706	126.003	129.427	111.066	67.7989	172.664	114.303	119.999	131.812	143.423
Cct8	T-complex protein 1 subunit theta OS=Mus musculus GN=Cct8 PE=1 SV=3	5.29	60125.9	478.93	P42932	12	29.56	0.0024	TCPQ_MOUSE	137.784	141.432	108.361	120.643	141.078	143.832	132.894	142.269	91.8613	129.933	144.309	141.228	131.302	142.869
Agk	Acylglycerol kinase, mitochondrial OS=Mus musculus GN=Agk PE=1 SV=1	8.44	47432.3	643.083	Q9ESW4	3	13.54	0.0024	AGK_MOUSE	125.633	111.005	110.44	218.608	107.303	143.664	131.003	134.509	116.146	142.461	119.452	113.158	131.115	142.666
Tomm70a	Mitochondrial import receptor subunit TOM70 OS=Mus musculus GN=Tomm70a PE=1 SV=2	7.38	68331.7	228.845	Q9CZW5	2	4.26	0.003	TOM70_MOUSE	154.934	125.707	109.592	131.291	139.595	123.217	153.349	145.846	86.3019	141.954	141.704	115.462	130.746	142.264
Scarb2	Lysosome membrane protein 2 OS=Mus musculus GN=Scarb2 PE=1 SV=3	4.81	54500.3	406.385	O35114	3	10.46	0.0024	SCRB2_MOUSE	148.47	157.259		71.0542	129.043	121.303	178.425	159.575	132.593	62.8139	140.391	136.45	130.671	142.182
Anxa3	Annexin A3 OS=Mus musculus GN=Anxa3 PE=1 SV=4	5.37	36555.2	753.794	O35639	9	40.56	0.0024	ANXA3_MOUSE	136.38	140.069	142.277	152.985	118.33	101.065	146.262	132.276	116.065	154.773	114.769	111.838	130.591	142.095
Acss2	Acetyl-coenzyme A synthetase, cytoplasmic OS=Mus musculus GN=Acss2 PE=1 SV=2	6.18	80059.7	256.056	Q9QXG4	7	15.41	0.003	ACSA_MOUSE	122.839	108.873	102.881	171.314	141.365	150.94	122.773	126.934	109.491	123.667	145.953	139.788	130.568	142.07
Stx1b	Syntaxin-1B OS=Mus musculus GN=Stx1b PE=1 SV=1	5.09	33472.9	1654.7	P61264	8	36.46	0.0024	STX1B_MOUSE	146.03	156.054	106.358	123.35	114.956	133.954	153.19	129.126	90.5663	147.189	120.493	133.03	129.525	140.935
Rps3a	40S ribosomal protein S3a OS=Mus musculus GN=Rps3a PE=1 SV=3	10.18	30113	1109.68	P97351	12	45.83	0.0024	RS3A_MOUSE	128.916	130.42	94.6052	106.205	148.921	150.026	137.515	122.839	99.0717	121.666	148.693	149.57	128.204	139.498
Ddah2	N(G),N(G)-dimethylarginine dimethylaminohydrolase 2 OS=Mus musculus GN=Ddah2 PE=1 SV=1	5.59	29988	1159.65	Q99LD8	10	62.81	0.0024	DDAH2_MOUSE	155.35	133.334	131.028	142.808	108.884	110.329	138.384	132.469	118.286	146.89	107.013	111.964	128.062	139.343
Rpl17	60S ribosomal protein L17 OS=Mus musculus GN=Rpl17 PE=2 SV=3	10.62	21651.3	1754.65	Q9CPR4	7	41.85	0	RL17_MOUSE	141.735	125.633	95.0947	121.776	156.503	160.425	127.568	127.167	93.0621	106.916	127.429	151.226	127.878	139.143
Sord	Sorbitol dehydrogenase OS=Mus musculus GN=Sord PE=1 SV=3	6.59	38819.8	1263.57	Q64442	10	41.74	0.0024	DHSO_MOUSE	93.0942	79.986	153.698	203.747	118.385	108.958	101.482	90.4056	157.315	190.49	118.594	117.918	127.839	139.101
Eef1d	Elongation factor 1-delta OS=Mus musculus GN=Eef1d PE=1 SV=3	4.72	31407.1	854.649	P57776	6	34.16	0.0024	EF1D_MOUSE	155.639	158.862	85.7987	113.845	124.593	133.633	152.123	151.228	82.5423	113.345	128.875	130.116	127.55	138.786
Lcp1	Plastin-2 OS=Mus musculus GN=Lcp1 PE=1 SV=4	5.02	70776.7	705.235	Q61233	14	28.71	0.0024	PLSL_MOUSE	133.201	297.174	168.42		90.6135	97.3947	141.471	262.194	20.5139	28.2345	56.4321	96.6119	126.569	137.719
Lancl1	LanC-like protein 1 OS=Mus musculus GN=Lancl1 PE=1 SV=1	7.63	46082.6	596.486	O89112	8	28.82	0.0024	LANC1_MOUSE	137.576	111.589	108.266	127.248	135.662	119.999	132.296	122.292	118.045	136.614	135.19	127.698	126.039	137.143
Ncl	Nucleolin OS=Mus musculus GN=Ncl PE=1 SV=2	4.48	76780.2	187.889	P09405	2	3.25	0.003	NUCL_MOUSE	147.854	138.022	102.913	122.543	120.297	127.447	135.519	136.012	123.654	107.421	123.501	125.372	125.879	136.969
Appl1	DCC-interacting protein 13-alpha OS=Mus musculus GN=Appl1 PE=1 SV=1	5.11	80012.6	284.897	Q8K3H0	3	6.79	0.003	DP13A_MOUSE	183.647	170.843			112.482	88.4972	171.253	139.441	72.0667		84.7184	101.447	124.933	135.938
Atp6v1c1	V-type proton ATPase subunit C 1 OS=Mus musculus GN=Atp6v1c1 PE=1 SV=4	7.3	44058.7	426.773	Q9Z1G3	5	14.4	0.0024	VATC1_MOUSE	136.472	126.333	127.465	157.819	128.871	123.537	108.069	129.58	124.736	129.268	97.2128	108.313	124.806	135.801
Hsd17b12	Very-long-chain 3-oxoacyl-CoA reductase OS=Mus musculus GN=Hsd17b12 PE=2 SV=1	9.84	34970	778.341	O70503	5	21.47	0.0024	DHB12_MOUSE	171.957	133.878	85.2945	87.875	129.672	130.644	140.452	137.017	91.2322	147.899	116.027	112.26	123.684	134.58
Rpl12	60S ribosomal protein L12 OS=Mus musculus GN=Rpl12 PE=1 SV=2	9.9	17975.7	7182.14	P35979	6	54.55	0	RL12_MOUSE	144.053	138.143	86.7818	106.278	142.118	139.044	133.735	130.167	85.1051	106.931	131.272	139.837	123.622	134.512
Letm1	LETM1 and EF-hand domain-containing protein 1, mitochondrial OS=Mus musculus GN=Letm1 PE=2 SV=1	6.11	83673.1	268.49	Q9Z2I0	3	5.56	0.003	LETM1_MOUSE	118.053	123.89	143.762	150.149	109.082	100.624	139.776	115.937	113.27	153.229	110.161	103.531	123.455	134.331
Atp5j2	ATP synthase subunit f, mitochondrial OS=Mus musculus GN=Atp5j2 PE=1 SV=3	10.23	10401.3	7420.05	P56135	2	26.14	0	ATPK_MOUSE	144.698	118.11	89.8327	105.488	141.315	135.368	142.006	117.044	90.4607	118.305	141.599	135.965	123.349	134.216
G6pdx	Glucose-6-phosphate 1-dehydrogenase X OS=Mus musculus GN=G6pdx PE=1 SV=3	6.04	59718.9	558.846	Q00612	9	22.52	0.0024	G6PD1_MOUSE	145.179	160.062	121.933	132.06	94.217	93.3676	144.096	149.293	113.879	116.6	100.022	103.859	122.881	133.706
Arpc4	Actin-related protein 2/3 complex subunit 4 OS=Mus musculus GN=Arpc4 PE=1 SV=3	8.78	19781.1	2415.52	P59999	6	47.02	0	ARPC4_MOUSE	150.961	134.416	99.7493	110.689	126.782	115.999	143.912	131.528	92.9261	117.051	119.679	120.16	121.988	132.734
Acadm	Medium-chain specific acyl-CoA dehydrogenase, mitochondrial OS=Mus musculus GN=Acadm PE=1 SV=1	8.4	46937.5	561.423	P45952	9	30.17	0.0024	ACADM_MOUSE	96.5624	163.522	115.084	143.412	126.236	147.11	81.8707	83.9572	117.785	147.237	121.921	111.779	121.373	132.065
Aldoc	Fructose-bisphosphate aldolase C OS=Mus musculus GN=Aldoc PE=1 SV=4	6.74	39794.1	2228.44	P05063	10	41.05	0	ALDOC_MOUSE	130.459	128.263	113.778	143.727	112.814	109.795	138.629	122.867	108.267	129.694	98.7398	112.897	120.827	131.471
Psmd5	26S proteasome non-ATPase regulatory subunit 5 OS=Mus musculus GN=Psmd5 PE=1 SV=4	4.93	56371.4	341.034	Q8BJY1	4	12.5	0.0024	PSMD5_MOUSE	184.764	160.544	68.8388	86.3712	113.931	105.026	189.469	174.397	56.9115	74.8288	116.548	107.944	119.964	130.533
S100a10	Protein S100-A10 OS=Mus musculus GN=S100a10 PE=1 SV=2	6.34	11300.1	2553.76	P08207	3	40.21	0	S10AA_MOUSE	127.021	232.986	119.303	120.037	74.6585	68.4223	125.045	219.886	109.967	124.785	52.7924	54.6856	119.132	129.627
Sod2	Superoxide dismutase [Mn], mitochondrial OS=Mus musculus GN=Sod2 PE=1 SV=3	8.82	24831.1	1170.64	P09671	7	47.3	0.0024	SODM_MOUSE	120.646	108.341	122.538	139.469	123.241	106.653	117.337	103.499	120.566	151.212	112.399	102.639	119.045	129.532
Mtmr2	Myotubularin-related protein 2 OS=Mus musculus GN=Mtmr2 PE=1 SV=3	6.86	73802.5	208.3	Q9Z2D1	2	6.84	0.003	MTMR2_MOUSE	108.486	133.491	81.2257	130.279	134.185	141.686	106.346	112.401	105.812	106.098	135.089	132.755	118.988	129.47
Sbspon	Somatomedin-B and thrombospondin type-1 domain-containing protein OS=Mus musculus GN=Sbspon PE=2 SV=1	8	30889.5	718.248	Q3UPR9	5	32.58	0.0024	SBSPO_MOUSE	115.512	121.342	90.5207	105.649	145.249	136.987	114.709	104.023	91.8538	119.79	135.524	141.742	118.575	129.021
Capza1	F-actin-capping protein subunit alpha-1 OS=Mus musculus GN=Capza1 PE=1 SV=4	5.2	33110.9	1460.01	P47753	8	50	0.0024	CAZA1_MOUSE	118.621	156.026	117.38	105.814	101.372	107.644	125.301	146.864	120.903	122.371	89.9261	102.793	117.918	128.306
Hspa1l	Heat shock 70 kDa protein 1-like OS=Mus musculus GN=Hspa1l PE=2 SV=4	5.83	71036.6	4318.7	P16627	7	15.13	0	HS71L_MOUSE	134.693	122.075	93.2511	106.942	130.157	139.576	104.909	118.448	83.3327	115.293	130.003	136.305	117.915	128.303
Prkaca	cAMP-dependent protein kinase catalytic subunit alpha OS=Mus musculus GN=Prkaca PE=1 SV=3	9.13	40684.7	379.107	P05132	7	30.77	0.0024	KAPCA_MOUSE	105.874	111.926	102.443	125.592	140.504	141.183	100.375	115.34	89.3737	101.624	129.733	142.35	117.193	127.517
Ephx1	Epoxide hydrolase 1 OS=Mus musculus GN=Ephx1 PE=1 SV=2	8.54	52747.7	480.744	Q9D379	7	17.14	0.0024	HYEP_MOUSE	137.068	114.901	94.1388	142.529	107.735	100.249	147.753	108.309	110.442	146.702	98.1795	95.1703	116.931	127.232
Prkca	Protein kinase C alpha type OS=Mus musculus GN=Prkca PE=1 SV=3	6.73	77992.6	297.089	P20444	5	9.82	0.003	KPCA_MOUSE	140.487	132.301	106.403	141.704	142.89	101.721	113.437	107.884	84.2899	116.747	123.813	84.2741	116.329	126.577
Rpl5	60S ribosomal protein L5 OS=Mus musculus GN=Rpl5 PE=1 SV=3	10.07	34628.8	1002.67	P47962	8	30.98	0.0024	RL5_MOUSE	125.622	103.649	110.482	123.215	132.863	124.567	123.672	111.869	92.9413	89.7556	118.389	134.744	115.981	126.198
Anxa11	Annexin A11 OS=Mus musculus GN=Anxa11 PE=2 SV=2	7.62	54421.6	322.037	P97384	6	13.52	0.003	ANX11_MOUSE	129.284	116.605	88.7622	118.881	142.349	124.303	118.552	115.9	103.399	103.882	98.7231	129.869	115.876	126.084
Apoe	Apolipoprotein E OS=Mus musculus GN=Apoe PE=1 SV=2	5.41	35923.7	1299.87	P08226	9	31.51	0.0024	APOE_MOUSE	125.728	120.78	72.0046	94.8584	140.296	128.56	131.638	131.714	69.5256	100.926	136.976	130.232	115.27	125.424
Lxn	Latexin OS=Mus musculus GN=Lxn PE=1 SV=2	5.37	25662.9	849.106	P70202	3	17.57	0.0024	LXN_MOUSE	178.682	163.999	78.3229	84.0688	116.319	100.988	147.805	150.165	74.2881	84.8181	95.5388	105.846	115.07	125.207
Capn5	Calpain-5 OS=Mus musculus GN=Capn5 PE=2 SV=1	7.01	73924.2	195.005	O08688	2	5.63	0.003	CAN5_MOUSE	120.852	117.957			142.688	85.8648	123.26	111.459			105.183	105.944	114.151	124.207
Psma7	Proteasome subunit alpha type-7 OS=Mus musculus GN=Psma7 PE=1 SV=1	8.71	28026	1564.89	Q9Z2U0	9	47.98	0.0024	PSA7_MOUSE	140.07	141.598	101.462	96.2504	98.2673	95.9401	130.798	132.848	100.996	111.564	107.909	111.151	114.071	124.12
Erlin2	Erlin-2 OS=Mus musculus GN=Erlin2 PE=1 SV=1	5.22	38100.7	716.619	Q8BFZ9	7	27.94	0.0024	ERLN2_MOUSE	123.173	119.948	156.401	77.2209	114.83	103.224	102.381	110.23	155.716	83.9996	113.407	103.26	113.649	123.661
Prdx3	Thioredoxin-dependent peroxide reductase, mitochondrial OS=Mus musculus GN=Prdx3 PE=1 SV=1	7.37	28355.2	1592.84	P20108	8	47.86	0.0024	PRDX3_MOUSE	126.593	127.514	104.024	137.773	99.3387	104.933	121.666	113.699	92.1891	126.651	93.662	106.69	112.894	122.84
Mtch2	Mitochondrial carrier homolog 2 OS=Mus musculus GN=Mtch2 PE=1 SV=1	8.2	34126.5	481.999	Q791V5	5	26.4	0.0024	MTCH2_MOUSE	129.864	123.028	97.5171	108.435	116.049	103.494	117.27	122.391	94.8121	114.289	110.79	116.692	112.886	122.83
Ube2m	NEDD8-conjugating enzyme Ubc12 OS=Mus musculus GN=Ube2m PE=2 SV=1	7.71	21185.1	1634.75	P61082	6	35.52	0.0024	UBC12_MOUSE	161.557	75.4448	130.209	167.284	79.2951	81.4498	71.0975	155.36	83.9292	128.117	138.792	80.5904	112.761	122.694
Hibch	3-hydroxyisobutyryl-CoA hydrolase, mitochondrial OS=Mus musculus GN=Hibch PE=1 SV=1	8.09	43322.9	348.828	Q8QZS1	3	12.21	0.0024	HIBCH_MOUSE	105.97	112.084	126.544	150.862	95.5216	97.999	111.714	87.0015	121.439	146.902	94.5702	102.176	112.732	122.663
Rpl15	60S ribosomal protein L15 OS=Mus musculus GN=Rpl15 PE=2 SV=4	12.01	24260.2	2109.07	Q9CZM2	6	30.39	0	RL15_MOUSE	114.12	134.644	90.5511	102.475	120.156	127.19	96.3345	132.126	83.3542	92.9598	115.185	143.515	112.718	122.647
Sult1a1	Sulfotransferase 1A1 OS=Mus musculus GN=Sult1a1 PE=2 SV=1	8.2	34202.7	739.346	P52840	8	41.24	0.0024	ST1A1_MOUSE	160.053	165.455	75.5957	89.6738	93.8716	93.7701	133.668	163.169	82.686	89.6261	87.797	103.939	111.609	121.441
Sgcd	Delta-sarcoglycan OS=Mus musculus GN=Sgcd PE=1 SV=1	9.4	32475.7	412.588	P82347	7	27.68	0.0024	SGCD_MOUSE	125.649	110.665	87.8501	117.494	118.326	119.167	120.442	113.055	83.2259	116.892	115.204	111.271	111.604	121.435
Ppp3ca	Serine/threonine-protein phosphatase 2B catalytic subunit alpha isoform OS=Mus musculus GN=Ppp3ca PE=1 SV=1	5.48	59328.2	416.207	P63328	5	12.09	0.0024	PP2BA_MOUSE	139.949	131.126		78.535	107.588	104.069	152.301	136.653	64.702	81.5191	111.497	112.799	110.976	120.753
Surf4	Surfeit locus protein 4 OS=Mus musculus GN=Surf4 PE=2 SV=1	7.82	30609.2	923.844	Q64310	4	18.59	0.0024	SURF4_MOUSE	147.246	105.64	89.5003	91.6003	116.538	124.927	125.622	111.621	88.4898	87.2527	116.84	122.66	110.661	120.41
Eif2s1	Eukaryotic translation initiation factor 2 subunit 1 OS=Mus musculus GN=Eif2s1 PE=1 SV=3	4.82	36393.4	416.031	Q6ZWX6	5	21.27	0.0024	IF2A_MOUSE	112.253	109.864	97.4247	115.264	115.759	109.472	127.42	112.126	88.6588	113.33	113.869	112.219	110.638	120.385
Samm50	Sorting and assembly machinery component 50 homolog OS=Mus musculus GN=Samm50 PE=1 SV=1	6.35	52263.2	370.711	Q8BGH2	7	21.11	0.0024	SAM50_MOUSE	119.614	117.265	102.557	112.718	117.456	104.391	118.338	118.75	100.505	105.795	91.338	114.263	110.249	119.961
Asl	Argininosuccinate lyase OS=Mus musculus GN=Asl PE=1 SV=1	6.51	51910.4	243.82	Q91YI0	3	8.41	0.003	ARLY_MOUSE	160.397	166.594	91.1429	136.194	69.9628	100.795	116.892	103.707	100.698	130.296	60.0815	84.9651	110.144	119.847
Lin7c	Protein lin-7 homolog C OS=Mus musculus GN=Lin7c PE=1 SV=2	8.76	21948.1	2409.96	O88952	7	41.62	0	LIN7C_MOUSE	121.729	116.386	103.619	117.429	102.325	93.0475	119.879	112.527	102.068	115.647	99.0784	113.538	109.773	119.443
Hspa12b	Heat shock 70 kDa protein 12B OS=Mus musculus GN=Hspa12b PE=1 SV=1	8.45	76860.8	847.886	Q9CZJ2	4	7.88	0.0024	HS12B_MOUSE	126.943	107.446	83.9971	93.2339	124.463	116.485	122.113	119.925	79.2745	98.7292	115.028	129.533	109.764	119.434
Pip4k2a	Phosphatidylinositol 5-phosphate 4-kinase type-2 alpha OS=Mus musculus GN=Pip4k2a PE=1 SV=1	6.53	46379.7	216.184	O70172	2	7.9	0.003	PI42A_MOUSE	96.7061	122.059	106.793	129.424	116.566	112.782	98.7537	96.9047	111.075	112.305	96.3951	114.335	109.508	119.155
Adh1	Alcohol dehydrogenase 1 OS=Mus musculus GN=Adh1 PE=1 SV=2	8.02	40626.9	310.224	P00329	4	17.6	0.003	ADH1_MOUSE	110.455	98.3781	132.573	134.933	99.6857	87.4728	79.6545	104.079	120.336	154.578	93.5079	98.0009	109.471	119.115
Hibadh	3-hydroxyisobutyrate dehydrogenase, mitochondrial OS=Mus musculus GN=Hibadh PE=1 SV=1	8.15	35839.2	390.656	Q99L13	4	18.21	0.0024	3HIDH_MOUSE	112.747	93.8687	92.3442	115.797	109.014	100.024	118.953	115.712	103.915	129.57	110.3	107.346	109.133	118.746
Acads	Short-chain specific acyl-CoA dehydrogenase, mitochondrial OS=Mus musculus GN=Acads PE=1 SV=2	8.61	45174.8	440.633	Q07417	7	28.16	0.0024	ACADS_MOUSE	83.7715	89.7034	107.351	123.34	116.678	109.777	85.1357	89.5678	113.088	133.541	125.803	131.469	109.102	118.713
Aldh3a2	Fatty aldehyde dehydrogenase OS=Mus musculus GN=Aldh3a2 PE=2 SV=2	8.4	54427.1	311.806	P47740	4	14.67	0.003	AL3A2_MOUSE	143.856	115.274	74.3932	92.8952	124.413	113.746	147.37	119.281	53.9425	77.4264	127.58	117.707	108.99	118.592
Tom1l2	TOM1-like protein 2 OS=Mus musculus GN=Tom1l2 PE=2 SV=1	4.51	56004.8	280.949	Q5SRX1	4	13.61	0.003	TM1L2_MOUSE	146.427	162.841	69.0157	84.0864	96.3578	79.3978	141.843	172.271	66.5924	85.3878	107.166	94.8018	108.849	118.438
Ndufa4	Cytochrome c oxidase subunit NDUFA4 OS=Mus musculus GN=Ndufa4 PE=1 SV=2	9.9	9326.81	4266.98	Q62425	3	36.59	0	NDUA4_MOUSE	97.7805	130.202	83.4846	119.997	113.905	104.015	113.94	121.933	94.0594	121.747	99.6844	102.27	108.585	118.15
Hnrnpa2b1	Heterogeneous nuclear ribonucleoproteins A2/B1 OS=Mus musculus GN=Hnrnpa2b1 PE=1 SV=2	9.19	37459.8	995.4	O88569	6	23.23	0.0024	ROA2_MOUSE	127.821	138.482	83.9086	102.199	109.266	110.881	129.295	134.681	60.9329	104.02	96.8659	99.8433	108.183	117.713
Rpl23a	60S ribosomal protein L23a OS=Mus musculus GN=Rpl23a PE=1 SV=1	10.89	17695.1	2245.97	P62751	6	36.54	0	RL23A_MOUSE	125.111	99.0603	80.7918	77.8882	137.105	130.726	119.178	109.772	68.1996	85.0445	137.466	125.934	108.023	117.539
Pcbp2	Poly(rC)-binding protein 2 OS=Mus musculus GN=Pcbp2 PE=1 SV=1	6.35	38621	806.521	Q61990	4	16.02	0.0024	PCBP2_MOUSE	114.575	110.153	72.174	88.6659	113.886	121.006	141.479	106.289	88.5457	105.643	125.38	106.555	107.863	117.365
Sft2d2	Vesicle transport protein SFT2B OS=Mus musculus GN=Sft2d2 PE=1 SV=1	9.33	17898.4	1350.65	Q8VD57	2	16.98	0.0024	SFT2B_MOUSE	92.6885	86.8362	115.129	144.827	116.754	108.41	89.3012	92.0796	110.134	133.776	99.3882	96.9156	107.187	116.629
Slc25a11	Mitochondrial 2-oxoglutarate/malate carrier protein OS=Mus musculus GN=Slc25a11 PE=1 SV=3	10.25	34326.1	849.518	Q9CR62	6	26.75	0.0024	M2OM_MOUSE	133.581	114.282	83.4448	79.9115	116.11	105.437	121.378	122.117	77.9622	99.1435	114.856	115.713	106.995	116.42
Gfap	Glial fibrillary acidic protein OS=Mus musculus GN=Gfap PE=1 SV=4	5.09	49957.2	601.432	P03995	3	7.44	0.0024	GFAP_MOUSE	108.552	99.2732	110.238	160.433	99.1184	91.745	102.867	60.9827	95.1553	162.229	94.6553	96.6613	106.826	116.236
Fam213a	Redox-regulatory protein FAM213A OS=Mus musculus GN=Fam213a PE=1 SV=2	9.58	24508.7	417.767	Q9CYH2	3	14.22	0.0024	F213A_MOUSE	88.7612	95.0553	186.664	230.005	58.659	56.7299	76.1193	59.2662	119.55	203.32	50.6773	51.8341	106.387	115.759
Ndrg2	Protein NDRG2 OS=Mus musculus GN=Ndrg2 PE=1 SV=1	5.08	41131.5	308.812	Q9QYG0	2	7.55	0.003	NDRG2_MOUSE	191.869	113.85			91.1339	70.7187	131.682	88.3591			89.7323	73.7255	106.384	115.755
Rps13	40S ribosomal protein S13 OS=Mus musculus GN=Rps13 PE=1 SV=2	10.94	17222.3	2314.69	P62301	6	40.4	0	RS13_MOUSE	120.393	115.989	76.5026	79.1234	119.619	123.536	115.752	118.99	73.165	80.2204	131.949	117.058	106.025	115.365
Abhd12	Monoacylglycerol lipase ABHD12 OS=Mus musculus GN=Abhd12 PE=1 SV=2	8.84	45669	500.717	Q99LR1	8	21.11	0.0024	ABD12_MOUSE	106.236	94.2955	119.242	147.604	92.2289	97.1927	118.765	96.8065	76.3225	123.69	103.346	93.4191	105.762	115.079
Serhl	Serine hydrolase-like protein OS=Mus musculus GN=Serhl PE=2 SV=1	8.12	35595.9	449.045	Q9EPB5	5	24.76	0.0024	SERHL_MOUSE	87.2242	158.831	110.242	108.056	101.587	118.429	91.4847	90.4169	88.5104	134.321	91.9288	87.7623	105.733	115.047
Marcks	Myristoylated alanine-rich C-kinase substrate OS=Mus musculus GN=Marcks PE=1 SV=2	4.12	29718.4	1447.78	P26645	7	44.01	0.0024	MARCS_MOUSE	119.355	114.662	95.1121	117.18	111.007	84.9438	123.139	124.797	86.7467	92.7725	106.174	90.2849	105.515	114.81
Pacsin2	Protein kinase C and casein kinase substrate in neurons protein 2 OS=Mus musculus GN=Pacsin2 PE=1 SV=1	4.92	56175.1	323.78	Q9WVE8	6	14.2	0.003	PACN2_MOUSE	101.954	94.3193	80.1889	107.919	120.371	111.129	98.826	103.069	84.2771	112.278	115.908	123.154	104.449	113.651
Rtkn	Rhotekin OS=Mus musculus GN=Rtkn PE=1 SV=3	6.22	63754.2	335.507	Q8C6B2	4	10.82	0.0024	RTKN_MOUSE	140.573	128.33			101.215	81.5549	130.142	138.517	64.1508	80.1593	89.2063	88.9092	104.276	113.462
Myl12b	Myosin regulatory light chain 12B OS=Mus musculus GN=Myl12b PE=1 SV=2	4.49	19836.2	5766.81	Q3THE2	8	55.81	0	ML12B_MOUSE	106.557	120.641	94.0339	99.296	98.0332	105.386	108.87	113.706	87.1029	101.797	103.911	108.434	103.981	113.141
Prkacb	cAMP-dependent protein kinase catalytic subunit beta OS=Mus musculus GN=Prkacb PE=1 SV=2	8.82	40879	416.924	P68181	7	31.05	0.0024	KAPCB_MOUSE	96.464	100.159	76.8882	96.8531	109.369	109.544	112.962	122.924	81.5014	108.794	113.09	114.47	103.585	112.71
Pgd	6-phosphogluconate dehydrogenase, decarboxylating OS=Mus musculus GN=Pgd PE=1 SV=3	6.86	53760.6	350.468	Q9DCD0	5	15.11	0.0024	6PGD_MOUSE	105.836	78.9692	85.5605	125.334	106.187	113.904	115.487	101.738	105.709	99.1408	104.922	97.7052	103.374	112.481
Steap3	Metalloreductase STEAP3 OS=Mus musculus GN=Steap3 PE=1 SV=1	9.45	55205.3	382.196	Q8CI59	5	12.3	0.0024	STEA3_MOUSE	120.935	109.118	65.5166	96.8561	111.972	111.447	124.082	126.817	58.0844	79.6606	117.026	116.029	103.129	112.214
Tmed9	Transmembrane emp24 domain-containing protein 9 OS=Mus musculus GN=Tmed9 PE=1 SV=2	8.7	27241.3	2615.58	Q99KF1	5	27.23	0	TMED9_MOUSE	115.688	110.02	85.2201	88.8587	120.295	122.644	105.493	96.9099	85.1192	93.3366	97.1715	103.112	101.989	110.974
Cox6a1	Cytochrome c oxidase subunit 6A1, mitochondrial OS=Mus musculus GN=Cox6a1 PE=1 SV=2	10.29	12352.2	1332.58	P43024	2	40.54	0.0024	CX6A1_MOUSE	68.8157	180.956	124.805	123.549	59.1801	70.8352	66.1325	195.381	93.8195	76.4063	63.711	93.2313	101.402	110.335
Kpna4	Importin subunit alpha-3 OS=Mus musculus GN=Kpna4 PE=1 SV=1	4.6	58436.1	381.624	O35343	2	9.02	0.0024	IMA3_MOUSE	116.179	128.819	74.6593	92.5461	87.2174	93.7937	151.737	114.929	63.1202	83.5122	98.7346	101.087	100.528	109.384
Mat2a	S-adenosylmethionine synthase isoform type-2 OS=Mus musculus GN=Mat2a PE=2 SV=2	6.01	44031	421.299	Q3THS6	2	8.86	0.0024	METK2_MOUSE		110.893	94.679	127.341	76.0735	89.3877	96.2221	107.869	99.8857	132.5	86.635	83.8424	100.484	109.336
Cab39l	Calcium-binding protein 39-like OS=Mus musculus GN=Cab39l PE=2 SV=3	8.49	39333.7	503.941	Q9DB16	7	22.85	0.0024	CB39L_MOUSE	114.866	84.9559	101.129	113.262	98.716	99.3937	109.453	60.9029	99.8054	119.294	105.162	96.6184	100.296	109.132
Rps18	40S ribosomal protein S18 OS=Mus musculus GN=Rps18 PE=1 SV=3	11.41	17718.7	1576.01	P62270	5	32.24	0.0024	RS18_MOUSE	116.669	95.7327	85.3025	82.5214	123.106	117.199	108.381	103.278	46.9404	80.2869	118.439	120.823	99.8899	108.689
Rpl19	60S ribosomal protein L19 OS=Mus musculus GN=Rpl19 PE=1 SV=1	11.89	23580.1	1070.17	P84099	2	13.27	0.0024	RL19_MOUSE	100.243	97.8178	79.5484	91.2837	113.189	108.792	95.2559	103.099	90.81	85.2824	114.353	116.779	99.7044	108.488
Gnai3	Guanine nucleotide-binding protein G(k) subunit alpha OS=Mus musculus GN=Gnai3 PE=1 SV=3	5.36	41108.5	2285.69	Q9DC51	12	44.92	0	GNAI3_MOUSE	111.474	103.963	82.139	78.2894	100.192	110.872	118.215	107.916	93.5508	79.5671	105.244	99.0251	99.204	107.943
Akr1b1	Aldose reductase OS=Mus musculus GN=Akr1b1 PE=1 SV=3	6.79	36074.5	516.191	P45376	7	30.38	0.0024	ALDR_MOUSE	79.6987	79.0571	90.4274	107.012	127.567	125.978	60.3499	64.4497	85.8693	114.486	125.306	126.12	98.8601	107.569
Rps7	40S ribosomal protein S7 OS=Mus musculus GN=Rps7 PE=2 SV=1	10.58	22126.9	1338.79	P62082	6	47.42	0.0024	RS7_MOUSE	114.707	100.81	76.111	94.769	115.38	122.364	63.9569	99.5576	78.32	90.1155	106.335	123.039	98.7887	107.491
Rps14	40S ribosomal protein S14 OS=Mus musculus GN=Rps14 PE=2 SV=3	10.53	16443.8	2356.12	P62264	7	64.24	0	RS14_MOUSE	98.7286	103.485	69.8123	83.9957	105.877	115.494	101.926	108.187	67.9677	92.5059	115.364	104.74	97.3402	105.915
Rpl9	60S ribosomal protein L9 OS=Mus musculus GN=Rpl9 PE=1 SV=2	10.38	21995.5	1949.57	P51410	6	42.71	0	RL9_MOUSE	96.8426	116.184	66.8234	82.2734	120.063	121.245	68.4839	120.764	72.9244	92.6477	103.635	105.154	97.2534	105.821
Rab8b	Ras-related protein Rab-8B OS=Mus musculus GN=Rab8b PE=1 SV=1	9.43	23774.2	3445.11	P61028	7	35.27	0	RAB8B_MOUSE	103.07	100.642	77.5318	80.9624	111.722	119.618	101.684	89.1693	67.5673	87.0049	116.63	108.834	97.0363	105.585
Carkd	ATP-dependent (S)-NAD(P)H-hydrate dehydratase OS=Mus musculus GN=Carkd PE=1 SV=1	7.64	37116.4	436.479	Q9CZ42	6	34.69	0.0024	NNRD_MOUSE	114.492	114.91	78.2413	95.3717	90.2704	93.6189	113.349	109.548	79.6593	87.0338	88.757	93.6468	96.5748	105.082
Vapa	Vesicle-associated membrane protein-associated protein A OS=Mus musculus GN=Vapa PE=1 SV=2	8.59	28083.4	824.806	Q9WV55	7	49.8	0.0024	VAPA_MOUSE	81.3932	94.6419	75.0878	90.2268	117.719	109.517	106.454	109.729	73.2661	79.0143	94.9931	119.666	95.9757	104.431
Ppa2	Inorganic pyrophosphatase 2, mitochondrial OS=Mus musculus GN=Ppa2 PE=1 SV=1	6.54	38570.8	315.244	Q91VM9	4	18.48	0.003	IPYR2_MOUSE	101.172	89.0006	103.155	96.518	106.142	83.9291	100.332	94.2187	87.5079	110.77	85.4263	91.6648	95.8197	104.261
C1qbp	Complement component 1 Q subcomponent-binding protein, mitochondrial OS=Mus musculus GN=C1qbp PE=1 SV=1	4.63	31355.1	322.026	O35658	2	9.71	0.003	C1QBP_MOUSE	113.029	125.147	77.1805	105.356	77.5351	74.7137	101.892	130.003	78.6224	115.794	72.4054	77.4429	95.76	104.196
Glrx3	Glutaredoxin-3 OS=Mus musculus GN=Glrx3 PE=1 SV=1	5.29	38063.6	386.788	Q9CQM9	4	16.62	0.0024	GLRX3_MOUSE	129.411	105.714	45.6595	74.1593	90.3905	102.503	125.414	129.675	52.2441	76.9482	106.318	110.273	95.7257	104.158
Rps19	40S ribosomal protein S19 OS=Mus musculus GN=Rps19 PE=1 SV=3	10.83	16085.5	3006.92	Q9CZX8	4	28.28	0	RS19_MOUSE	94.3032	92.073	88.435	95.9113	106.356	98.106	96.6276	92.4016	79.0322	91.9443	104.237	108.552	95.665	104.092
Myl6	Myosin light polypeptide 6 OS=Mus musculus GN=Myl6 PE=1 SV=3	4.36	17101.2	5563.49	Q60605	6	50.99	0	MYL6_MOUSE	64.3434	189.672	85.9015	115.27	51.7712	60.2248	65.6729	186.709	92.5975	109.107	57.037	64.7648	95.256	103.647
Gsk3b	Glycogen synthase kinase-3 beta OS=Mus musculus GN=Gsk3b PE=1 SV=2	8.89	47223.6	786.08	Q9WV60	6	27.62	0.0024	GSK3B_MOUSE	87.8909	90.5245	77.6585	152.193	99.3522	96.8101	83.6559	84.0449	75.5665	93.3557	95.5485	104.603	95.1003	103.478
Rpl13a	60S ribosomal protein L13a OS=Mus musculus GN=Rpl13a PE=1 SV=4	11.44	23578.3	1115.36	P19253	2	11.33	0.0024	RL13A_MOUSE	101.151	95.9207	67.4466	85.5368	113.339	154.182	95.2404	90.7225	65.7151	75.0217	95.2107	95.3471	94.5695	102.9
Arf6	ADP-ribosylation factor 6 OS=Mus musculus GN=Arf6 PE=1 SV=2	9.29	20196.3	3722.03	P62331	5	44	0	ARF6_MOUSE	80.1641	77.8168	92.8803	114.995	92.6725	109.993	81.1574	79.017	91.9169	104.233	103.677	105.71	94.5194	102.846
Rpl23	60S ribosomal protein L23 OS=Mus musculus GN=Rpl23 PE=1 SV=1	10.94	14979.5	2991.2	P62830	5	50.71	0	RL23_MOUSE	99.3655	86.1048	78.5018	91.5481	106.043	100.19	99.3224	93.1875	65.0164	94.6241	106.379	103.217	93.6249	101.873
Tubb6	Tubulin beta-6 chain OS=Mus musculus GN=Tubb6 PE=1 SV=1	4.59	50546.7	20791.9	Q922F4	21	61.07	0	TBB6_MOUSE	93.8737	93.7798	62.1284	60.6937	115.178	89.9714	143.388	131.445	58.2035	72.9885	101.018	99.8642	93.5444	101.785
Svip	Small VCP/p97-interacting protein OS=Mus musculus GN=Svip PE=3 SV=1	9.46	8477.66	6754.96	Q3UZP4	2	32.47	0	SVIP_MOUSE	87.5647	98.9569	106.233	114.644	87.7652	92.8229	78.2914	89.1841	96.3018	116.862	68.5953	85.0254	93.5205	101.759
Ist1	IST1 homolog OS=Mus musculus GN=Ist1 PE=2 SV=1	5.13	39639.5	618.524	Q9CX00	6	25.69	0.0024	IST1_MOUSE	81.5869	63.0987	103.748	96.5904	109.533	96.4047	81.52	58.6145	106.425	116.007	108.071	99.6415	93.4367	101.668
Snx1	Sorting nexin-1 OS=Mus musculus GN=Snx1 PE=1 SV=1	4.96	59066.3	488.445	Q9WV80	6	14.56	0.0024	SNX1_MOUSE	120.799	107.834	67.2994	66.2461	108.655	107.251	95.3508	99.3575	64.5506	91.2539	106.162	86.4554	93.4346	101.666
Prune	Protein prune homolog OS=Mus musculus GN=Prune PE=2 SV=1	4.77	50923.9	582.644	Q8BIW1	4	15.42	0.0024	PRUNE_MOUSE	98.4391	123.678			75.9537	64.7162	126.424	96.8874			93.4808	67.4391	93.3774	101.603
Rps16	40S ribosomal protein S16 OS=Mus musculus GN=Rps16 PE=2 SV=4	10.57	16559.4	2564.39	P14131	5	27.4	0	RS16_MOUSE	97.6546	100.312	62.4812	77.343	105.295	104.241	113.287	100.085	68.0113	81.1384	101.185	104.689	92.9769	101.168
Lman2	Vesicular integral-membrane protein VIP36 OS=Mus musculus GN=Lman2 PE=2 SV=2	6.49	40772	475.313	Q9DBH5	6	25.14	0.0024	LMAN2_MOUSE	101.596	93.1713	77.0712	84.6001	113.231	108.657	72.8857	105.617	58.3275	89.8679	105.288	104.762	92.9228	101.109
Hprt1	Hypoxanthine-guanine phosphoribosyltransferase OS=Mus musculus GN=Hprt1 PE=1 SV=3	6.23	24798.5	963.584	P00493	10	63.3	0.0024	HPRT_MOUSE	79.2148	67.3873	96.9567	121.458	90.9231	89.7402	85.7311	68.7799	104.084	117.255	94.6921	95.6967	92.6599	100.823
Pdlim5	PDZ and LIM domain protein 5 OS=Mus musculus GN=Pdlim5 PE=1 SV=4	8.16	64553.9	199.983	Q8CI51	2	5.58	0.003	PDLI5_MOUSE	97.9385	93.1223	84.7253	108.591	90.5322	80.2043	96.9085	100.443	80.9666	90.8628	103.111	84.4168	92.6518	100.814
Prps1	Ribose-phosphate pyrophosphokinase 1 OS=Mus musculus GN=Prps1 PE=1 SV=4	6.54	35347.5	356.458	Q9D7G0	2	10.69	0.0024	PRPS1_MOUSE	99.6312	143.47	88.2522	108.263	75.3725	79.2657	79.0083	88.976	87.1723	111.108	76.7878	72.5107	92.4848	100.632
Cend1	Cell cycle exit and neuronal differentiation protein 1 OS=Mus musculus GN=Cend1 PE=1 SV=1	9.55	15044	1989.76	Q9JKC6	3	40.94	0	CEND_MOUSE	104.75	100.972	76.5641	89.8206	95.2326	87.9942	104.653	110.235	74.8958	88.6335	90.0994	85.2478	92.4248	100.567
Fdps	Farnesyl pyrophosphate synthase OS=Mus musculus GN=Fdps PE=1 SV=1	5.33	40923.8	442.257	Q920E5	8	27.76	0.0024	FPPS_MOUSE	120.877	113.177	65.9341	84.6107	107.393	88.2922	115.785	109.143	61.6712	80.1869	66.9414	92.9761	92.2489	100.375
Hnrnpd	Heterogeneous nuclear ribonucleoprotein D0 OS=Mus musculus GN=Hnrnpd PE=1 SV=2	7.9	38525.3	676.467	Q60668	2	6.76	0.0024	HNRPD_MOUSE	102.246	103.35	65.6143	86.0327	103.092	97.5034	87.8451	103.183	71.4186	81.6312	99.0284	103.267	92.0177	100.124
Cacybp	Calcyclin-binding protein OS=Mus musculus GN=Cacybp PE=1 SV=1	8.12	26624.3	818.885	Q9CXW3	5	40.61	0.0024	CYBP_MOUSE	68.3599	96.8753	82.7849	126.298	99.7615	125.03	67.9845	114.509	69.5131	82.8881	79.2064	87.3574	91.714	99.7934
Bcap31	B-cell receptor-associated protein 31 OS=Mus musculus GN=Bcap31 PE=1 SV=4	9.15	28013.6	480.056	Q61335	3	18.37	0.0024	BAP31_MOUSE	116.11	99.729	66.5701	83.4378	93.529	83.4265	112.578	104.512	72.6822	79.0841	93.6916	92.9905	91.5284	99.5914
Serping1	Plasma protease C1 inhibitor OS=Mus musculus GN=Serping1 PE=1 SV=3	5.84	55869.8	207.571	P97290	2	5.75	0.003	IC1_MOUSE	92.7365	86.98	103.527	103.694	73.7532	88.1062	90.0036	84.5547	103.91	114.516	77.1732	77.023	91.3315	99.3771
Arhgap1	Rho GTPase-activating protein 1 OS=Mus musculus GN=Arhgap1 PE=1 SV=1	5.96	50524.8	336.666	Q5FWK3	5	16.86	0.0024	RHG01_MOUSE	132.808	107.118		73.5658	78.0977	74.7381	131.031	124.864	68.2949	64.3432	74.2496	71.5474	90.9689	98.9826
Sdpr	Serum deprivation-response protein OS=Mus musculus GN=Sdpr PE=1 SV=3	4.97	46821	311.824	Q63918	4	12.44	0.003	SDPR_MOUSE	99.689	105.356	82.1255	98.1479	98.5999	107.52	82.0888	99.2483	52.5725	85.0688	84.2559	94.6163	90.7741	98.7707
Gnb4	Guanine nucleotide-binding protein subunit beta-4 OS=Mus musculus GN=Gnb4 PE=2 SV=4	5.7	38120.4	2733.99	P29387	8	48.24	0	GBB4_MOUSE	86.6127	87.2152	97.6867	103.911	87.3388	80.8542	89.0127	77.6438	103.207	116.609	72.705	85.7253	90.7101	98.7011
Dhrs1	Dehydrogenase/reductase SDR family member 1 OS=Mus musculus GN=Dhrs1 PE=2 SV=1	8.36	34518.6	1482.85	Q99L04	9	36.1	0.0024	DHRS1_MOUSE	118.746	121.969	79.7665	95.7678	109.664	101.849	85.3059	84.9481	59.5903	68.6825	76.9219	83.0584	90.5224	98.4968
Cav2	Caveolin-2 OS=Mus musculus GN=Cav2 PE=1 SV=1	5.2	18455.2	3228.16	Q9WVC3	6	63.58	0	CAV2_MOUSE	102.401	100.87	69.5959	89.8032	79.3444	72.9046	125.61	116.489	78.5184	71.252	83.4894	88.2086	89.8739	97.7911
Pura	Transcriptional activator protein Pur-alpha OS=Mus musculus GN=Pura PE=1 SV=1	6.02	34997.8	614.944	P42669	3	24.3	0.0024	PURA_MOUSE	119.293	105.827	62.3671	75.7641	86.5981	83.2435	124.432	107.554	63.4758	81.6166	87.153	75.5711	89.408	97.2842
Gng2	Guanine nucleotide-binding protein G(I)/G(S)/G(O) subunit gamma-2 OS=Mus musculus GN=Gng2 PE=2 SV=2	8.25	7964.22	6484.4	P63213	5	54.93	0	GBG2_MOUSE	112.647	106.04	70.6866	72.0641	88.9383	83.6792	81.5001	81.6007	85.1857	98.5913	97.9525	91.8119	89.2248	97.0849
Arpc5	Actin-related protein 2/3 complex subunit 5 OS=Mus musculus GN=Arpc5 PE=2 SV=3	5.31	16345.4	1243.71	Q9CPW4	3	29.14	0.0024	ARPC5_MOUSE	106.602	107.365	77.5404	88.0568	91.3254	91.95	95.2197	93.6049	69.4799	83.1794	75.8026	85.0983	88.7687	96.5886
Sacm1l	Phosphatidylinositide phosphatase SAC1 OS=Mus musculus GN=Sacm1l PE=2 SV=1	6.89	67514.2	191.148	Q9EP69	3	4.77	0.003	SAC1_MOUSE	85.2519	97.1986			92.5575	83.6742	103.456	88.1312	68.4334	79.1913	87.8924	96.5921	88.2379	96.011
Psma5	Proteasome subunit alpha type-5 OS=Mus musculus GN=Psma5 PE=1 SV=1	4.55	26582.2	896.353	Q9Z2U1	5	33.2	0.0024	PSA5_MOUSE	108.053	103.295	76.3729	130.405	71.4795	69.9045	98.3764	109.604	68.2953	67.4179	70.5612	77.3661	87.5943	95.3108
Dusp3	Dual specificity protein phosphatase 3 OS=Mus musculus GN=Dusp3 PE=1 SV=1	6.08	20700.3	1005.82	Q9D7X3	3	25.95	0.0024	DUS3_MOUSE	156.013	77.4726	38.1919	42.3843	92.8618	95.745	149.507	157.023	42.966	57.7311	85.91	52.4266	87.3527	95.0479
Ndufa13	NADH dehydrogenase [ubiquinone] 1 alpha subcomplex subunit 13 OS=Mus musculus GN=Ndufa13 PE=1 SV=3	9.79	16859.7	2176.85	Q9ERS2	4	32.64	0	NDUAD_MOUSE	90.7807	83.2712	80.4383	80.5566	92.3249	92.5117	91.0046	78.9895	78.2311	96.8455	90.2068	88.6065	86.9806	94.643
Mapre3	Microtubule-associated protein RP/EB family member 3 OS=Mus musculus GN=Mapre3 PE=1 SV=1	5.19	32251.4	501.607	Q6PER3	9	35.59	0.0024	MARE3_MOUSE	79.1148	78.3132	79.9825	90.4205	96.5841	91.6229	66.9589	79.9174	85.4982	91.6356	92.65	105.964	86.5552	94.1801
Capns1	Calpain small subunit 1 OS=Mus musculus GN=Capns1 PE=2 SV=1	5.28	28577.2	1539.52	O88456	6	32.71	0.0024	CPNS1_MOUSE	94.2669	86.8232	81.1818	83.7463	87.9724	87.0113	85.8003	84.2638	75.5338	89.4009	93.7484	88.66	86.5341	94.1572
Acaa1a	3-ketoacyl-CoA thiolase A, peroxisomal OS=Mus musculus GN=Acaa1a PE=1 SV=1	8.47	44409.6	689.251	Q921H8	6	27.83	0.0024	THIKA_MOUSE	67.5162	64.393	70.957	86.9332	112.993	99.724	75.4523	74.8708	73.4715	92.2063	115.179	103.481	86.4315	94.0455
Dnaja1	DnaJ homolog subfamily A member 1 OS=Mus musculus GN=Dnaja1 PE=1 SV=1	6.67	45609.6	471.786	P63037	2	9.57	0.0024	DNJA1_MOUSE	82.5627	86.9389	69.335	74.7761	112.568	105.743	66.7954	84.675	62.4481	83.805	101.638	101.588	86.0727	93.6551
Napa	Alpha-soluble NSF attachment protein OS=Mus musculus GN=Napa PE=1 SV=1	5.15	33645.9	1227.21	Q9DB05	9	40.68	0.0024	SNAA_MOUSE	115.825	108.221	57.6129	65.6301	84.3732	84.0506	113.981	112.781	54.978	69.3913	80.4137	85.5661	86.0686	93.6507
Rcn3	Reticulocalbin-3 OS=Mus musculus GN=Rcn3 PE=2 SV=1	4.55	38001.6	457.252	Q8BH97	4	24.09	0.0024	RCN3_MOUSE	87.4799	139.047	62.6697	73.1325	64.1604	66.3583	90.3175	143.005	66.7186	71.3482	87.9334	78.574	85.8953	93.4621
Lypla2	Acyl-protein thioesterase 2 OS=Mus musculus GN=Lypla2 PE=1 SV=1	6.83	25136.2	578.616	Q9WTL7	4	37.66	0.0024	LYPA2_MOUSE	91.9466	97.0134	88.5766	97.817	77.6455	77.9068	69.65	92.9574	90.3855	91.6497	73.8512	81.2135	85.8844	93.4503
Psmc6	26S protease regulatory subunit 10B OS=Mus musculus GN=Psmc6 PE=1 SV=1	7.27	44458.2	332.171	P62334	4	16.45	0.0024	PRS10_MOUSE	103.032	97.5899		69.0071	91.944	70.9863	95.3703	96.6875	62.9036	70.6604	101.535	82.5936	85.6645	93.2109
Ybx1	Nuclease-sensitive element-binding protein 1 OS=Mus musculus GN=Ybx1 PE=1 SV=3	10.13	35730	1214.37	P62960	4	27.64	0.0024	YBOX1_MOUSE	101.238	85.2191	85.6955	61.3767	93.8595	87.2034	93.9298	101.921	57.759	74.1285	91.1941	94.2237	85.6457	93.1905
Pgm1	Phosphoglucomutase-1 OS=Mus musculus GN=Pgm1 PE=1 SV=4	6.12	61703.4	339.568	Q9D0F9	5	11.74	0.0024	PGM1_MOUSE					95.0299	93.9299	68.7457		60.5942		97.9614	95.8198	85.3468	92.8653
Arl8a	ADP-ribosylation factor-like protein 8A OS=Mus musculus GN=Arl8a PE=2 SV=1	7.83	21618	1760.58	Q8VEH3	10	61.29	0	ARL8A_MOUSE	94.5729	100.235	68.7325	79.1759	93.6708	91.7101	80.1514	93.064	62.8619	74.0314	89.273	94.8828	85.1968	92.7021
Gls	Glutaminase kidney isoform, mitochondrial OS=Mus musculus GN=Gls PE=1 SV=1	7.89	74819.3	377.15	D3Z7P3	2	4.75	0.0024	GLSK_MOUSE	84.822				85.8668	90.8827	75.8204	89.632		88.7109	69.1784	94.5869	84.9375	92.42
Kiaa1045	Protein KIAA1045 OS=Mus musculus GN=Kiaa1045 PE=2 SV=2	5.43	45964.3	243.695	Q80TL4	2	5.5	0.003	K1045_MOUSE	119.141	97.5096			63.4224	76.9179	119.575	103.237		51.5593	64.0818	68.3953	84.8711	92.3476
Ndufs8	NADH dehydrogenase [ubiquinone] iron-sulfur protein 8, mitochondrial OS=Mus musculus GN=Ndufs8 PE=1 SV=1	5.83	24494.6	939.996	Q8K3J1	4	18.87	0.0024	NDUS8_MOUSE	78.9674	74.0439	70.5742	80.3419	99.9038	96.2338	99.2611	73.8694	68.9248	82.7808	100.478	92.2841	84.8053	92.276
	Ig gamma-3 chain C region OS=Mus musculus PE=1 SV=2	6.76	44499.4	450.42	P03987	4	17.84	0.0024	IGHG3_MOUSE	52.6625	60.2426	113.04	121.61	96.454	100.396	47.2672	70.8637	78.695	99.2837	80.9879	94.0535	84.6297	92.085
Psmc3	26S protease regulatory subunit 6A OS=Mus musculus GN=Psmc3 PE=1 SV=2	4.9	49834.2	390.205	O88685	5	18.33	0.0024	PRS6A_MOUSE	103.438	102.681	68.428	78.2715	90.1582	88.6441	87.3947	95.0024	59.8582	70.5663	78.3507	84.8455	83.9699	91.3671
Purb	Transcriptional activator protein Pur-beta OS=Mus musculus GN=Purb PE=1 SV=3	5.14	34015.5	870.04	O35295	6	36.42	0.0024	PURB_MOUSE	110.081	99.2954	56.3805	76.2145	87.2359	83.8952	109.014	99.4554	50.1555	71.0533	81.3193	82.3486	83.8707	91.2592
Adh5	Alcohol dehydrogenase class-3 OS=Mus musculus GN=Adh5 PE=1 SV=3	6.98	40346.2	374.426	P28474	2	10.43	0.0024	ADHX_MOUSE	76.6829	103.759	58.5777	65.5727	99.4145	72.1801	92.7514	105.419	58.7398	79.5422	110.503	79.9709	83.5928	90.9568
Rpl35	60S ribosomal protein L35 OS=Mus musculus GN=Rpl35 PE=2 SV=1	11.49	14552.6	1781.52	Q6ZWV7	2	14.63	0	RL35_MOUSE	81.4549	75.138	74.2136	75.3481	98.1308	99.7705	78.8504	70.8076	74.5507	78.0322	95.5363	97.4592	83.2744	90.6103
Bgn	Biglycan OS=Mus musculus GN=Bgn PE=2 SV=1	6.9	42095.5	413.162	P28653	4	13.82	0.0024	PGS1_MOUSE	85.6941	75.0362	68.4527	81.7556	86.1295	85.3518	78.9631	82.9402	72.746	89.8339	98.6555	90.1367	82.9746	90.2841
Rps20	40S ribosomal protein S20 OS=Mus musculus GN=Rps20 PE=1 SV=1	10.44	13486.8	3317.87	P60867	3	25.21	0	RS20_MOUSE	82.1859	88.3296	61.855	67.2382	99.7838	98.5704	81.988	79.2549	62.9884	70.8801	99.6265	97.7345	82.5363	89.8072
Arpc3	Actin-related protein 2/3 complex subunit 3 OS=Mus musculus GN=Arpc3 PE=1 SV=3	8.8	20752.8	1680.89	Q9JM76	6	32.58	0.0024	ARPC3_MOUSE	88.3318	68.8885	76.269	85.4042	82.7985	83.9138	90.8904	69.1218	70.4062	86.3528	99.422	86.7956	82.3829	89.6403
Etf1	Eukaryotic peptide chain release factor subunit 1 OS=Mus musculus GN=Etf1 PE=1 SV=4	5.37	49259.1	300.446	Q8BWY3	3	10.07	0.003	ERF1_MOUSE	89.7951	65.4293	71.3464	88.1286	86.2532	87.4422	71.2419	75.935	68.2561	99.372	90.2351	94.2261	82.3051	89.5556
Lasp1	LIM and SH3 domain protein 1 OS=Mus musculus GN=Lasp1 PE=1 SV=1	6.67	30393.6	560.583	Q61792	4	19.77	0.0024	LASP1_MOUSE	74.2707	84.0041	81.9002	95.6386	69.8039	82.0758	77.7848	84.9877	78.115	108.743	74.9759	74.7463	82.2538	89.4998
Glod4	Glyoxalase domain-containing protein 4 OS=Mus musculus GN=Glod4 PE=1 SV=1	5.12	33601.9	851.69	Q9CPV4	9	42.95	0.0024	GLOD4_MOUSE	105.066	113.698	54.524	65.1651	76.4844	78.5251	103.5	107.996	55.9752	60.0675	81.6086	81.4298	82.0034	89.2273
Ssr1	Translocon-associated protein subunit alpha OS=Mus musculus GN=Ssr1 PE=1 SV=1	4.14	32065.1	501.005	Q9CY50	4	20.98	0.0024	SSRA_MOUSE	91.264	92.6569	77.9335	59.8416	94.9008	85.2056	89.1377	92.3207	54.8662	72.6774	86.4686	84.1988	81.7893	88.9944
Slc25a24	Calcium-binding mitochondrial carrier protein SCaMC-1 OS=Mus musculus GN=Slc25a24 PE=1 SV=1	7.25	53130.2	314.132	Q8BMD8	2	5.26	0.003	SCMC1_MOUSE	87.0122	87.9276			79.2445	73.6965	94.7324	67.1892			76.9455	79.9114	80.8324	87.9532
Csnk2a1	Casein kinase II subunit alpha OS=Mus musculus GN=Csnk2a1 PE=1 SV=2	7.58	45247.7	436.219	Q60737	3	13.81	0.0024	CSK21_MOUSE	93.7213	88.493	73.9886	94.525	75.7835	68.6903	110.254	72.1835	78.7408	77.1964	65.1318	71.0325	80.8117	87.9307
Parva	Alpha-parvin OS=Mus musculus GN=Parva PE=1 SV=1	5.57	42386.9	290.33	Q9EPC1	2	5.91	0.003	PARVA_MOUSE	100.648	69.7367	92.4733	106.545	87.2645	81.2905	47.3126	83.5294	78.0075		57.2913	84.6964	80.7996	87.9175
Dctn4	Dynactin subunit 4 OS=Mus musculus GN=Dctn4 PE=1 SV=1	7.57	53912.4	275.487	Q8CBY8	3	9.64	0.003	DCTN4_MOUSE	76.6449	73.0827	71.8484		91.2903	93.2989	80.0935	85.93	70.4642	68.4288	83.6249	93.298	80.7277	87.8392
Nap1l1	Nucleosome assembly protein 1-like 1 OS=Mus musculus GN=Nap1l1 PE=1 SV=2	4.16	45630.3	665.38	P28656	5	17.39	0.0024	NP1L1_MOUSE	85.869	81.2639	62.5063	64.9632	88.7632	87.1139	92.5253	90.5895	67.4702	70.3823	87.0384	87.5799	80.5054	87.5974
Mpst	3-mercaptopyruvate sulfurtransferase OS=Mus musculus GN=Mpst PE=1 SV=3	6.11	33251.3	578.469	Q99J99	2	13.47	0.0024	THTM_MOUSE	98.8183	85.8598	69.6457	77.6994	65.6851	54.2161	121.166	85.0784	78.1474	94.2206	71.4117	63.8835	80.486	87.5763
Stx12	Syntaxin-12 OS=Mus musculus GN=Stx12 PE=1 SV=1	5.16	31309.4	456.376	Q9ER00	5	25.55	0.0024	STX12_MOUSE	100.536	96.1518	70.8921	76.6856	79.1407	75.8422	93.0784	89.3238	51.9527	69.6138	84.7887	72.5154	80.0434	87.0947
Ppp2r4	Serine/threonine-protein phosphatase 2A activator OS=Mus musculus GN=Ppp2r4 PE=1 SV=1	5.93	36995.3	1007.75	P58389	6	38.08	0.0024	PTPA_MOUSE	111.288	117.363	68.7976	73.3111	55.7117	54.2402	114.243	104.811	67.2396	77.9239	56.2051	56.3118	79.7872	86.8159
Mcts2	Malignant T-cell-amplified sequence 2 OS=Mus musculus GN=Mcts2 PE=2 SV=1	9.48	20665.4	1865.61	Q9CQ21	4	41.99	0	MCTS2_MOUSE	82.2819	77.6481	80.2814	87.3841	71.6999	73.4341	68.3753	71.9629	100.388	94.0452	73.5577	74.3772	79.6196	86.6336
Actn3	Alpha-actinin-3 OS=Mus musculus GN=Actn3 PE=2 SV=1	5.15	103670	437.876	O88990	8	9.67	0.0024	ACTN3_MOUSE	87.9256	119.338	55.6115	66.0874	78.5704	75.2615	94.3725	118.893	53.4344	62.5502	68.1359	72.9591	79.4283	86.4254
	Ig heavy chain V region AC38 205.12 OS=Mus musculus PE=1 SV=1	7	13048.4	2318.41	P06330	5	55.08	0	HVM51_MOUSE	99.0439	62.6119	84.9099	104.215	59.6683	63.3821	78.4434	66.9327	83.0486	118.866	57.1621	73.3925	79.3064	86.2927
Eif5a	Eukaryotic translation initiation factor 5A-1 OS=Mus musculus GN=Eif5a PE=1 SV=2	4.9	17060.4	1975.94	P63242	5	54.55	0	IF5A1_MOUSE	69.1172	156.296	48.7702	69.2726	70.3502	117.495	73.2579	98.4814	43.289	59.2732	71.0888	74.4193	79.2593	86.2415
Bphl	Valacyclovir hydrolase OS=Mus musculus GN=Bphl PE=1 SV=1	9.2	33079.1	497.448	Q8R164	3	15.46	0.0024	BPHL_MOUSE	73.8378	60.4304	83.9795	104.81	86.9404	72.7876	64.5543	59.8407	79.9177	98.532	81.5531	83.4088	79.216	86.1944
Sars	Serine--tRNA ligase, cytoplasmic OS=Mus musculus GN=Sars PE=2 SV=3	5.89	58902.1	269.483	P26638	2	3.13	0.003	SYSC_MOUSE	106.561	95.8074	69.6711		70.7199	70.1476	77.4525	81.9205	75.3031	84.2689	67.8435	68.3361	78.9119	85.8635
Psma4	Proteasome subunit alpha type-4 OS=Mus musculus GN=Psma4 PE=1 SV=1	7.71	29756	497.541	Q9R1P0	3	15.71	0.0024	PSA4_MOUSE	94.2437	85.0006	92.066	71.9234	65.3605	54.7834	92.9108	81.4046	72.1692	87.0212	67.3489	79.8442	78.6731	85.6036
Vsnl1	Visinin-like protein 1 OS=Mus musculus GN=Vsnl1 PE=1 SV=2	4.82	22313.5	563.262	P62761	5	31.94	0.0024	VISL1_MOUSE	116.625	113.175	64.347	44.0798	81.4503	69.7967	98.6062	107.083	56.7432	40.5527	77.9973	73.5764	78.6693	85.5996
Basp1	Brain acid soluble protein 1 OS=Mus musculus GN=Basp1 PE=1 SV=3	4.29	22086.6	1423.28	Q91XV3	7	66.37	0.0024	BASP1_MOUSE	87.5444	84.6507	67.0334	68.0551	76.9751	64.5889	100.958	96.0207	60.1449	77.564	82.482	71.3899	78.1173	84.9989
Rab21	Ras-related protein Rab-21 OS=Mus musculus GN=Rab21 PE=1 SV=4	7.91	24505.5	930.4	P35282	6	32.43	0.0024	RAB21_MOUSE	73.7643	72.3038	66.4609	88.2315	81.3039	75.488	66.9465	73.584	70.2459	96.1341	85.816	77.0061	77.2738	84.081
Myl9	Myosin regulatory light polypeptide 9 OS=Mus musculus GN=Myl9 PE=1 SV=3	4.59	19911.3	4084.59	Q9CQ19	7	50	0	MYL9_MOUSE	78.0441	88.141	71.6731	78.8594	66.3374	71.414	82.5443	83.2535	68.1462	85.7618	70.4386	74.0082	76.5518	83.2955
Sec22b	Vesicle-trafficking protein SEC22b OS=Mus musculus GN=Sec22b PE=1 SV=3	8.73	24911.7	1443.88	O08547	6	40.47	0.0024	SC22B_MOUSE	87.5792	78.7366	56.0213	62.3955	83.4921	76.4595	87.3299	83.1975	58.6117	72.0098	84.9054	83.8994	76.2198	82.9343
Naga	Alpha-N-acetylgalactosaminidase OS=Mus musculus GN=Naga PE=2 SV=2	6	47748.1	256.043	Q9QWR8	3	8.92	0.003	NAGAB_MOUSE	88.4277	79.518	55.4295	81.6302	77.8337	77.5428	82.2485	85.249	57.7857	64.5714	78.3247	84.1051	76.0555	82.7555
Ndufs7	NADH dehydrogenase [ubiquinone] iron-sulfur protein 7, mitochondrial OS=Mus musculus GN=Ndufs7 PE=1 SV=1	10.15	24968.1	946.348	Q9DC70	2	16.07	0.0024	NDUS7_MOUSE	88.3456	89.8559	59.9187	71.9213	80.3109	77.4873	86.5132	68.3269	59.6618	65.9788	79.7295	82.9923	75.9202	82.6082
Hrsp12	Ribonuclease UK114 OS=Mus musculus GN=Hrsp12 PE=1 SV=3	9.13	14312.5	2995.7	P52760	6	68.89	0	UK114_MOUSE	67.9701	67.2888	75.2188	105.28	70.1111	65.2178	72.951	73.2951	71.3598	104.407	68.6841	67.6323	75.7846	82.4607
Psmb4	Proteasome subunit beta type-4 OS=Mus musculus GN=Psmb4 PE=1 SV=1	5.31	29230.2	488.128	P99026	5	32.95	0.0024	PSB4_MOUSE	95.0412	94.4799	74.0861	85.1092	67.5068	66.5776	81.8981	92.0325	63.4479	63.8501	58.4353	65.8681	75.6944	82.3626
Serpinb6	Serpin B6 OS=Mus musculus GN=Serpinb6 PE=1 SV=1	5.41	42941.2	281.689	Q60854	3	7.14	0.003	SPB6_MOUSE	90.5656	86.7907	77.0861	67.6763	67.5637	68.1292	88.1317	83.0287	67.4824	66.7937	70.6757	74.3261	75.6875	82.3551
Macrod1	O-acetyl-ADP-ribose deacetylase MACROD1 OS=Mus musculus GN=Macrod1 PE=1 SV=2	8.99	35865	749.255	Q922B1	5	24.77	0.0024	MACD1_MOUSE	46.3295	64.9614	70.9953	83.862	87.9853	97.4194	63.0458	61.4992	60.5808	76.4824	88.8236	103.047	75.4193	82.0633
Atp6v0c	V-type proton ATPase 16 kDa proteolipid subunit OS=Mus musculus GN=Atp6v0c PE=2 SV=1	9.51	15808	597.465	P63082	2	31.61	0.0024	VATL_MOUSE	87.9537	110.309	55.7419	51.7365	66.7007	70.3444	92.7238	104.734	44.6801	61.0519	80.2534	75.5965	75.1522	81.7726
Gpx4	Phospholipid hydroperoxide glutathione peroxidase, mitochondrial OS=Mus musculus GN=Gpx4 PE=1 SV=4	8.44	22649	683.395	O70325	5	28.93	0.0024	GPX41_MOUSE	76.0714	88.5425	74.4918	82.8362	74.7621	73.529	78.8018	83.4006	65.6243	77.2705	55.9583	65.7419	74.7525	81.3377
Fkbp1a	Peptidyl-prolyl cis-trans isomerase FKBP1A OS=Mus musculus GN=Fkbp1a PE=1 SV=2	8.66	11979.7	8085.68	P26883	4	40.74	0	FKB1A_MOUSE	82.8826	163.999	36.6982	52.5911	58.3387	60.5753	84.1766	151.918	39.5728	46.9081	53.1072	65.781	74.7124	81.2941
Rcn1	Reticulocalbin-1 OS=Mus musculus GN=Rcn1 PE=1 SV=1	4.51	38113.1	712.523	Q05186	7	31.08	0.0024	RCN1_MOUSE	70.7594	123.831	58.1249	55.4744	69.1244	59.2188	86.0432	119.145	45.3311	64.0112	66.7174	73.9679	74.3124	80.8588
D10Jhu81e	ES1 protein homolog, mitochondrial OS=Mus musculus GN=D10Jhu81e PE=1 SV=1	9.02	28432.6	756.276	Q9D172	5	34.21	0.0024	ES1_MOUSE	62.568	77.7599	68.6558	95.8247	72.8607	81.707	59.2275	58.953	69.24	99.7624	66.9101	76.7721	74.1868	80.7221
Npm1	Nucleophosmin OS=Mus musculus GN=Npm1 PE=1 SV=1	4.42	32731.2	565.817	Q61937	4	26.03	0.0024	NPM_MOUSE	74.8878	79.2901	70.2597	84.4312	62.9052	64.0158	64.7896	90.4181	75.3666	87.4093	71.1257	63.9245	74.0686	80.5936
M6pr	Cation-dependent mannose-6-phosphate receptor OS=Mus musculus GN=M6pr PE=1 SV=1	5.09	31685.7	793.422	P24668	4	22.3	0.0024	MPRD_MOUSE	86.0038	78.883	47.3877	60.336	85.5806	76.3073	95.477	86.055	48.1472	59.3272	81.134	79.7046	73.6953	80.1874
Rps6	40S ribosomal protein S6 OS=Mus musculus GN=Rps6 PE=1 SV=1	11.29	28851.8	679.514	P62754	3	17.67	0.0024	RS6_MOUSE	86.6863	78.9338	50.0204	53.8374	80.5746	82.4795	93.3373	78.856	56.162	64.2273	85.3288	73.8178	73.6884	80.1799
Rpl10a	60S ribosomal protein L10a OS=Mus musculus GN=Rpl10a PE=1 SV=3	10.4	25087.5	609.158	P53026	4	13.82	0.0024	RL10A_MOUSE	85.8591	75.0489	60.4328	62.0769	80.3847	81.6942	75.8904	79.8249	58.5589	65.3474	80.2985	77.0165	73.5361	80.0141
Mvk	Mevalonate kinase OS=Mus musculus GN=Mvk PE=2 SV=1	6.22	42333.7	317.055	Q9R008	4	13.92	0.003	KIME_MOUSE	84.2831	73.8888	77.6037	58.7576	72.8363	77.4089	77.6023	75.4422	56.9526	66.925	76.5717	83.8395	73.5093	79.985
Rpl27	60S ribosomal protein L27 OS=Mus musculus GN=Rpl27 PE=1 SV=2	10.98	15797.8	684.431	P61358	4	36.03	0.0024	RL27_MOUSE	69.1189	71.7661	43.3145	60.2817	95.4942	96.5561	71.3948	77.68	41.6249	52.6997	98.5971	99.0037	73.1276	79.5697
Arl8b	ADP-ribosylation factor-like protein 8B OS=Mus musculus GN=Arl8b PE=2 SV=1	8.6	21767.2	1829.91	Q9CQW2	10	53.76	0	ARL8B_MOUSE	82.0049	88.6644	59.3	68.3103	79.8978	78.7417	67.9502	80.2924	54.2351	65.5357	73.8473	78.0116	73.066	79.5026
Ak2	Adenylate kinase 2, mitochondrial OS=Mus musculus GN=Ak2 PE=1 SV=5	7.17	26753.9	517.053	Q9WTP6	4	20.92	0.0024	KAD2_MOUSE	64.5183	63.7559	135.277	79.7063	50.2379	44.809	52.7047	56.8946	144.522	87.754	38.2521	50.5025	72.4113	78.7902
Fn3krp	Ketosamine-3-kinase OS=Mus musculus GN=Fn3krp PE=2 SV=2	7.85	34696.5	565.531	Q8K274	5	18.77	0.0024	KT3K_MOUSE	53.7152	54.9477	74.712	94.1531	80.8491	82.2441	62.8737	52.3465	59.2988	91.8645	80.9337	78.4412	72.1983	78.5585
Rpl22	60S ribosomal protein L22 OS=Mus musculus GN=Rpl22 PE=1 SV=2	9.61	14816	1874.33	P67984	3	39.06	0	RL22_MOUSE	85.1962	88.4837	55.132	65.0102	75.3474	73.9058	90.347	88.5397	51.1677	52.1755	68.4134	71.3697	72.0907	78.4414
Psmc5	26S protease regulatory subunit 8 OS=Mus musculus GN=Psmc5 PE=1 SV=1	7.38	45797.2	355.057	P62196	2	7.88	0.0024	PRS8_MOUSE	171.459				52.1422	39.8695	47.6309	58.4352			90.9107	41.6724	71.7314	78.0505
Uqcrb	Cytochrome b-c1 complex subunit 7 OS=Mus musculus GN=Uqcrb PE=1 SV=3	9.51	13527.5	1081.22	Q9D855	4	27.03	0.0024	QCR7_MOUSE	62.4706	60.299	71.744	113.127	66.1137	52.5419	66.8643	65.0049	70.0374	97.746	70.5732	62.7162	71.6032	77.911
Hsd17b7	3-keto-steroid reductase OS=Mus musculus GN=Hsd17b7 PE=2 SV=1	6.26	37659.1	630.719	O88736	5	29.34	0.0024	DHB7_MOUSE	91.7421	77.9374	62.7742	86.7537	72.6471	75.4447	73.8401	70.0838	59.0634	62.3203	61.3446	54.9621	70.7428	76.9747
Elovl1	Elongation of very long chain fatty acids protein 1 OS=Mus musculus GN=Elovl1 PE=2 SV=1	9.81	32792	362.245	Q9JLJ5	2	8.24	0.0024	ELOV1_MOUSE	82.9018	77.426	57.6782	69.034	74.8805	81.3108	77.6671	78.6496	57.2415	50.2616	71.7444	66.5992	70.4496	76.6557
Ran	GTP-binding nuclear protein Ran OS=Mus musculus GN=Ran PE=1 SV=3	7.31	24594.2	709.347	P62827	6	35.65	0.0024	RAN_MOUSE	64.761	74.0681	67.1985	71.1849	75.6503	76.6709	56.5167	69.3581	58.7409	75.9553	67.7875	79.8243	69.8097	75.9595
Yars	Tyrosine--tRNA ligase, cytoplasmic OS=Mus musculus GN=Yars PE=2 SV=3	6.59	59447.6	323.262	Q91WQ3	2	3.79	0.003	SYYC_MOUSE	73.5045	68.6648			77.7942	74.5276	64.4418	60.0288	58.9783	64.8061	77.0774	76.9041	69.6728	75.8105
Sypl1	Synaptophysin-like protein 1 OS=Mus musculus GN=Sypl1 PE=1 SV=2	8.94	29241.6	436.42	O09117	2	13.03	0.0024	SYPL1_MOUSE	91.5847	81.2965	68.6662	80.6327	65.5596	65.0325	66.879	71.9066	53.6188	65.1403	60.033	64.0547	69.5337	75.6592
Tspan15	Tetraspanin-15 OS=Mus musculus GN=Tspan15 PE=2 SV=2	5.56	33869.3	421.971	F7BWT7	2	8.16	0.0024	TSN15_MOUSE	88.86	76.6711	63.5863	71.1717	63.4885	57.9306	82.4701	87.7158	53.6925	65.0509	59.9065	59.0996	69.137	75.2275
Rab35	Ras-related protein Rab-35 OS=Mus musculus GN=Rab35 PE=1 SV=1	8.39	23310.4	4196.4	Q6PHN9	6	36.82	0	RAB35_MOUSE	71.3462	103.795	50.7088	57.9663	80.7053	88.6097	72.021	69.1084	40.0168	53.7054	74.0415	66.7572	69.0651	75.1493
Ucp1	Mitochondrial brown fat uncoupling protein 1 OS=Mus musculus GN=Ucp1 PE=1 SV=2	9.39	33647	548.148	P12242	4	15.96	0.0024	UCP1_MOUSE			89.9633	99.9406	44.8334	39.7449			78.5081	100.5	54.8424	43.7186	69.0064	75.0854
Psmb1	Proteasome subunit beta type-1 OS=Mus musculus GN=Psmb1 PE=1 SV=1	7.83	26600.3	1086.19	O09061	5	34.58	0.0024	PSB1_MOUSE	90.3474	91.9572	63.6381	55.29	64.078	60.3883	82.5848	77.5799	60.9219	54.4439	62.9022	62.7301	68.9052	74.9752
Nap1l4	Nucleosome assembly protein 1-like 4 OS=Mus musculus GN=Nap1l4 PE=1 SV=1	4.37	42850.5	215.922	Q78ZA7	3	9.6	0.003	NP1L4_MOUSE	76.6058	84.5392	52.8376	57.6494	67.0826	66.2881	103.654	61.414	48.5474	63.675	68.0667	74.0972	68.7048	74.7572
Fbxo2	F-box only protein 2 OS=Mus musculus GN=Fbxo2 PE=1 SV=1	4.01	33961.1	1235.28	Q80UW2	5	28.96	0.0024	FBX2_MOUSE	73.073	60.7481			94.3163	81.0169	72.382	56.1963	36.5692	41.8888	87.901	81.5201	68.5612	74.601
Fyn	Tyrosine-protein kinase Fyn OS=Mus musculus GN=Fyn PE=1 SV=4	6.22	61188.2	245.216	P39688	2	7.08	0.003	FYN_MOUSE		66.3213			70.4088	67.2119	73.2982	58.6201			75.9849	67.3858	68.4616	74.4926
Dynll2	Dynein light chain 2, cytoplasmic OS=Mus musculus GN=Dynll2 PE=1 SV=1	7.24	10463.9	5570.59	Q9D0M5	4	57.3	0	DYL2_MOUSE	66.3642	72.6894	72.7068	70.2534	63.5998	66.6531	71.341	77.1193	72.1184	72.2012	54.7354	59.8199	68.3001	74.3169
Zc2hc1a	Zinc finger C2HC domain-containing protein 1A OS=Mus musculus GN=Zc2hc1a PE=2 SV=1	10.29	35779.4	359.306	Q8BJH1	2	9.88	0.0024	ZC21A_MOUSE	78.813	69.2297	68.4318	69.1311	71.5001	69.8829	57.8743	54.8343	66.4486	81.813	76.8057	52.0551	68.0683	74.0647
Auh	Methylglutaconyl-CoA hydratase, mitochondrial OS=Mus musculus GN=Auh PE=1 SV=1	9.9	33680.2	329.786	Q9JLZ3	2	8.28	0.0024	AUHM_MOUSE	75.5832	73.2291	62.6913	71.2407	60.3041	55.3269	81.3917	72.3522	77.1291	66.1797	59.3499	59.4457	67.852	73.8293
Rab6a	Ras-related protein Rab-6A OS=Mus musculus GN=Rab6a PE=1 SV=4	5.23	23703.9	2290.08	P35279	7	36.54	0	RAB6A_MOUSE	59.8417	64.08	53.7986	67.793	84.0605	76.1077	62.6808	61.8567	55.9629	81.1729	73.7659	72.5546	67.8063	73.7796
Hist1h1b	Histone H1.5 OS=Mus musculus GN=Hist1h1b PE=1 SV=2	11.4	22576.2	453.439	P43276	2	10.31	0.0024	H15_MOUSE	60.6412	55.7148	56.2478	73.3664	83.3817	77.7139	61.5532	51.8111	56.1314	68.0849	79.0818	86.68	67.534	73.4833
Ostf1	Osteoclast-stimulating factor 1 OS=Mus musculus GN=Ostf1 PE=1 SV=2	5.31	24010.9	508.751	Q62422	6	45.12	0.0024	OSTF1_MOUSE	85.2667	84.3229	41.2818	71.1033	54.3562	57.6341	89.4479	92.9033	53.754	63.363	60.6743	55.2152	67.4436	73.3849
Adsl	Adenylosuccinate lyase OS=Mus musculus GN=Adsl PE=2 SV=2	6.92	55607.7	286.497	P54822	2	7.85	0.003	PUR8_MOUSE	65.0209	57.8745			74.2704	60.0719	79.3584				65.9744	68.1788	67.2499	73.1742
Rab18	Ras-related protein Rab-18 OS=Mus musculus GN=Rab18 PE=2 SV=2	5.06	23320.3	1280.81	P35293	7	42.72	0.0024	RAB18_MOUSE	71.3258	67.9939	62.8157	55.8446	78.531	79.8469	64.6452	61.3849	43.6286	57.5881	83.106	78.4358	67.0955	73.0062
Psma2	Proteasome subunit alpha type-2 OS=Mus musculus GN=Psma2 PE=1 SV=3	7.3	26040.7	394.524	P49722	3	26.07	0.0024	PSA2_MOUSE	77.0929	85.6303	73.9035	54.721	65.7938	57.4723	82.0795	84.2729	67.5634	54.8599	43.7584	57.8851	67.0861	72.9959
Eif4h	Eukaryotic translation initiation factor 4H OS=Mus musculus GN=Eif4h PE=1 SV=3	7.2	27398.1	517.87	Q9WUK2	4	26.21	0.0024	IF4H_MOUSE	74.7374	108.94	101.118	85.8753	41.595	48.0173	41.8604	90.6013	97.0699	41.6459	21.1586	51.4923	67.0092	72.9123
Nipsnap1	Protein NipSnap homolog 1 OS=Mus musculus GN=Nipsnap1 PE=1 SV=1	9.71	33591.4	610.251	O55125	6	43.66	0.0024	NIPS1_MOUSE	85.3253	68.9074	65.9561	90.8959	55.4523	59.7887	65.2828	69.935	57.7451	67.558	58.8168	58.3749	67.0032	72.9057
Cope	Coatomer subunit epsilon OS=Mus musculus GN=Cope PE=2 SV=3	4.75	34795.3	543.137	O89079	3	17.53	0.0024	COPE_MOUSE	79.8715	74.2865	54.7708	55.5073	70.6764	80.2911	81.4522	61.1202	45.4194	55.3159	74.6014	69.2671	66.8816	72.7735
H1f0	Histone H1.0 OS=Mus musculus GN=H1f0 PE=2 SV=4	11.38	20860.9	1174.27	P10922	2	11.86	0.0024	H10_MOUSE	58.3445	59.0314	62.4871	72.9431	77.5748	74.4484	59.5201	52.8803	54.7553	67.798	81.9885	76.8146	66.5488	72.4113
Dnaja2	DnaJ homolog subfamily A member 2 OS=Mus musculus GN=Dnaja2 PE=1 SV=1	6.03	46373	431.068	Q9QYJ0	5	18.45	0.0024	DNJA2_MOUSE	66.7178	75.8615	62.835		60.5698	80.425	63.8675	88.6726	53.6747		49.4419	59.4472	66.1513	71.9788
Ssr4	Translocon-associated protein subunit delta OS=Mus musculus GN=Ssr4 PE=2 SV=1	5.41	19164.7	1155.06	Q62186	3	25	0.0024	SSRD_MOUSE	80.774	76.1472	43.2266	47.4729	74.7549	75.5512	83.3863	76.7109	42.0459	45.8077	75.6399	71.011	66.044	71.8621
Isoc1	Isochorismatase domain-containing protein 1 OS=Mus musculus GN=Isoc1 PE=1 SV=1	7.17	32317.7	715.188	Q91V64	3	16.84	0.0024	ISOC1_MOUSE	50.6976	44.9011	81.7801	92.4087	75.139	54.6115		68.4746	83.0999	69.8765	46.5624	57.0049	65.8688	71.6713
Ndufv2	NADH dehydrogenase [ubiquinone] flavoprotein 2, mitochondrial OS=Mus musculus GN=Ndufv2 PE=1 SV=2	7.17	27627.6	312.065	Q9D6J6	3	20.16	0.003	NDUV2_MOUSE	88.4256	88.0816	55.3952	58.0343	54.4142	43.5228	93.6621	86.536	59.3871	64.4288	51.6359	44.0984	65.6352	71.4172
Rap2a	Ras-related protein Rap-2a OS=Mus musculus GN=Rap2a PE=1 SV=2	4.53	20870.6	1984.69	Q80ZJ1	6	39.89	0	RAP2A_MOUSE	64.0122	68.9922	51.9285	66.464	72.3346	66.7982	71.1018	69.715	53.8956	60.8882	72.752	68.4306	65.6094	71.3892
Camk2b	Calcium/calmodulin-dependent protein kinase type II subunit beta OS=Mus musculus GN=Camk2b PE=1 SV=2	6.89	61202.3	486.127	P28652	5	12.55	0.0024	KCC2B_MOUSE	77.1731	69.3476	62.0551	68.5887	57.4347	65.0292	78.4934	74.3719	46.3778	54.0386	68.5916	64.0182	65.46	71.2266
Rhoc	Rho-related GTP-binding protein RhoC OS=Mus musculus GN=Rhoc PE=1 SV=2	6.19	22348.6	10650.1	Q62159	7	52.33	0	RHOC_MOUSE	58.7978	63.4258	57.3852	64.2246	78.7956	77.3045	62.48	61.8487	51.6636	64.1735	64.8604	73.3977	64.8631	70.5771
Atp5d	ATP synthase subunit delta, mitochondrial OS=Mus musculus GN=Atp5d PE=1 SV=1	4.79	17600.1	1862.89	Q9D3D9	3	37.5	0	ATPD_MOUSE	56.1843	169.032	36.9067	62.2314	38.4853	29.3265	60.9346	159.049	37.5604	59.1392	36.6146	27.6728	64.4281	70.1037
Rps15	40S ribosomal protein S15 OS=Mus musculus GN=Rps15 PE=2 SV=2	10.79	17040.2	981.932	P62843	4	55.17	0.0024	RS15_MOUSE	47.8523	85.1792	55.8624	59.2861	74.1807	80.5547	44.3572	67.0554	28.0214	64.8085	78.1404	86.3515	64.3042	69.9689
Cnn2	Calponin-2 OS=Mus musculus GN=Cnn2 PE=1 SV=1	7.53	33611.8	1303.7	Q08093	4	18.03	0.0024	CNN2_MOUSE	83.8942	87.5695	50.1346	74.6727	57.8678	57.6182	56.3276	73.0127	51.8427	60.3126	58.0183	60.2845	64.2963	69.9604
Pgam1	Phosphoglycerate mutase 1 OS=Mus musculus GN=Pgam1 PE=1 SV=3	6.79	28946.1	953.305	Q9DBJ1	7	40.16	0.0024	PGAM1_MOUSE	85.9326	73.4011	39.9615	59.3049	56.8614	56.1157	88.4712	76.1728	48.161	64.0025	63.2251	58.6431	64.1877	69.8422
Psmf1	Proteasome inhibitor PI31 subunit OS=Mus musculus GN=Psmf1 PE=2 SV=1	4.89	29835.5	358.08	Q8BHL8	3	16.61	0.0024	PSMF1_MOUSE	100.288	100.232	36.0182	39.7009	55.7862	57.8695	97.0639	99.7685	30.9236	43.489	54.4541	51.6817	63.9397	69.5723
Map1lc3a	Microtubule-associated proteins 1A/1B light chain 3A OS=Mus musculus GN=Map1lc3a PE=1 SV=1	9.16	14329.5	1288.02	Q91VR7	3	23.14	0.0024	MLP3A_MOUSE	75.7374	67.5566	56.7209	68.8679	57.4841	62.0465	74.0603	73.23	52.2573	64.7078	56.3784	55.437	63.707	69.3192
Sept6	Septin-6 OS=Mus musculus GN=Sept6 PE=1 SV=4	5.99	50075.9	742.707	Q9R1T4	6	16.82	0.0024	SEPT6_MOUSE	65.6032	67.6856	67.2596	71.7509	48.0342	53.4079	63.46	67.4369	64.8934	83.1337	54.4839	56.0197	63.5974	69.1999
Cndp2	Cytosolic non-specific dipeptidase OS=Mus musculus GN=Cndp2 PE=1 SV=1	5.31	53223.6	426.637	Q9D1A2	2	6.11	0.0024	CNDP2_MOUSE	70.5246	59.5248		75.5303	50.468	47.5124	80.3232	73.6268	55.9158	64.1307	59.3725	59.0596	63.2717	68.8455
Qki	Protein quaking OS=Mus musculus GN=Qki PE=1 SV=1	8.87	37784.8	461.977	Q9QYS9	5	23.46	0.0024	QKI_MOUSE	58.7982	57.6976	74.124	63.0082	67.4324	71.4121	54.4638	50.0687	49.5926	66.2252	68.701	75.8503	63.1145	68.6745
Stoml2	Stomatin-like protein 2, mitochondrial OS=Mus musculus GN=Stoml2 PE=1 SV=1	9.21	38499	244.227	Q99JB2	2	7.93	0.003	STML2_MOUSE	84.2165	50.722	56.3789		55.4602	42.0221	101.594	54.1581	54.7567	79.1928	58.8281	53.1656	62.7723	68.3021
Eif3e	Eukaryotic translation initiation factor 3 subunit E OS=Mus musculus GN=Eif3e PE=1 SV=1	5.63	52620.1	279.065	P60229	2	4.94	0.003	EIF3E_MOUSE	59.9799	67.3785			60.0524	63.4483	65.4028	61.5831		62.309	61.2499	63.1076	62.7235	68.249
Tst	Thiosulfate sulfurtransferase OS=Mus musculus GN=Tst PE=1 SV=3	7.85	33694.1	230.076	P52196	3	14.81	0.003	THTR_MOUSE	51.9512	49.7679	82.433	91.3941	52.1578	47.3748	61.1739	53.9073	69.4531	85.8186	52.3229	51.5874	62.4452	67.9462
Rpl27a	60S ribosomal protein L27a OS=Mus musculus GN=Rpl27a PE=2 SV=5	11.53	16719.5	1481.59	P14115	2	15.54	0.0024	RL27A_MOUSE	57.2895	55.2798	34.6116	44.2131	84.02	96.2726	63.1769	59.775	31.7422	55.2337	78.756	83.7983	62.014	67.4771
Npc2	Epididymal secretory protein E1 OS=Mus musculus GN=Npc2 PE=1 SV=1	7.64	16784.2	920.215	Q9Z0J0	3	21.48	0.0024	NPC2_MOUSE	78.3983	85.3336	75.7499	80.164	53.013	58.6911	52.6013	58.3822	50.0304	75.2575	36.9301	37.9343	61.8738	67.3245
Anp32b	Acidic leucine-rich nuclear phosphoprotein 32 family member B OS=Mus musculus GN=Anp32b PE=1 SV=1	3.68	31249.9	728.753	Q9EST5	3	14.71	0.0024	AN32B_MOUSE	66.4278	63.4568	40.3654	47.8988	75.6842	77.6154	63.8637	61.0447	43.7271	44.215	79.0213	79.095	61.8679	67.3181
Tmx1	Thioredoxin-related transmembrane protein 1 OS=Mus musculus GN=Tmx1 PE=1 SV=1	5.01	31795.1	274.001	Q8VBT0	2	8.99	0.003	TMX1_MOUSE	75.7286	73.9638	36.5222	47.2485	62.2505	58.9926	81.9218	62.4764	38.7462	61.7039	71.9537	69.9247	61.7861	67.229
Psma3	Proteasome subunit alpha type-3 OS=Mus musculus GN=Psma3 PE=1 SV=3	5.12	28633.4	409.905	O70435	3	13.33	0.0024	PSA3_MOUSE	71.5982	64.8424	65.2288	71.1481	56.9943	53.3723	73.4847	68.7466	56.68	57.6932	51.1239	48.9607	61.6561	67.0876
Rhob	Rho-related GTP-binding protein RhoB OS=Mus musculus GN=Rhob PE=1 SV=1	4.91	22579.6	7535.04	P62746	7	51.53	0	RHOB_MOUSE	72.5041	54.9995	49.0419	59.6568	70.9978	70.8899	68.0798	62.7762	42.22	51.9459	62.5574	72.4042	61.5061	66.9244
Mpc1	Mitochondrial pyruvate carrier 1 OS=Mus musculus GN=Mpc1 PE=1 SV=1	9.9	12625.7	2049.84	P63030	3	50.46	0	MPC1_MOUSE	53.6557	79.88	56.2162	80.8174	49.6903	57.504	44.9715	74.875	71.3798	55.6047	44.3223	67.5672	61.3737	66.7803
S100a6	Protein S100-A6 OS=Mus musculus GN=S100a6 PE=1 SV=3	5.15	10107.7	1833.82	P14069	3	24.72	0	S10A6_MOUSE	99.0787	81.7844	60.8808	49.3524	43.0193	42.1921	88.142	80.7586	36.8096	64.9795	44.0328	41.9469	61.0814	66.4623
Rps24	40S ribosomal protein S24 OS=Mus musculus GN=Rps24 PE=2 SV=1	11.23	15423.2	1824.77	P62849	2	20.3	0	RS24_MOUSE	63.1248	64.6623	49.3003	58.2476	66.1026	61.6386	74.2073	67.1285	45.6453	57.6529	60.1339	64.1855	61.0025	66.3764
Rhog	Rho-related GTP-binding protein RhoG OS=Mus musculus GN=Rhog PE=2 SV=1	8.08	21764.7	4678.94	P84096	10	68.06	0	RHOG_MOUSE	62.4951	53.7776	52.024	60.4229	68.8761	69.3453	63.0859	60.273	51.6709	58.2796	64.2231	66.9711	60.9537	66.3233
Chchd3	MICOS complex subunit Mic19 OS=Mus musculus GN=Chchd3 PE=1 SV=1	8.53	26562.7	575.837	Q9CRB9	5	18.06	0.0024	MIC19_MOUSE	65.6101	69.4001	48.9339	59.4819	61.3282	61.8994	61.1014	66.1537	54.2593	63.262	60.8395	56.113	60.6985	66.0457
Ykt6	Synaptobrevin homolog YKT6 OS=Mus musculus GN=Ykt6 PE=2 SV=1	5.93	22485.5	1701.44	Q9CQW1	6	36.36	0.0024	YKT6_MOUSE	99.1688	92.682	30.1699	41.1797	50.2809	50.3537	97.3891	94.5247	29.5677	41.0791	48.1202	48.9193	60.2863	65.5971
Dpep1	Dipeptidase 1 OS=Mus musculus GN=Dpep1 PE=1 SV=2	5.89	46178.8	275.173	P31428	2	7.56	0.003	DPEP1_MOUSE	79.6188					34.9553	46.7807	79.643					60.2494	65.557
Gclm	Glutamate--cysteine ligase regulatory subunit OS=Mus musculus GN=Gclm PE=2 SV=1	5.2	30877	494.789	O09172	5	26.64	0.0024	GSH0_MOUSE	89.9682	93.8549		43.1293	50.4713	42.5574	88.8284	86.0986	30.737		36.1717	40.333	60.215	65.5195
Rps9	40S ribosomal protein S9 OS=Mus musculus GN=Rps9 PE=1 SV=3	11.09	22648.5	495.536	Q6ZWN5	5	23.2	0.0024	RS9_MOUSE	75.494	70.3245	40.1024	58.1728	54.5431	75.4073	67.4249	66.718	36.4955	56.9585	58.5361	59.5074	59.9737	65.257
Ndufa7	NADH dehydrogenase [ubiquinone] 1 alpha subcomplex subunit 7 OS=Mus musculus GN=Ndufa7 PE=1 SV=3	10.56	12632.6	399.271	Q9Z1P6	5	45.13	0.0024	NDUA7_MOUSE	67.9531	65.0298	54.125	69.5159	63.0588	55.4494	64.5988	61.3286	49.0448	56.8533	59.3398	53.1215	59.9516	65.2329
	Ester hydrolase C11orf54 homolog OS=Mus musculus PE=2 SV=1	5.84	35452.2	494.099	Q91V76	3	12.38	0.0024	CK054_MOUSE	75.5861	63.6276	64.1487	59.8411	43.3667	46.6699	84.9456	66.1693	46.1815	62.2188	51.8188	54.5005	59.9229	65.2017
Pafah1b2	Platelet-activating factor acetylhydrolase IB subunit beta OS=Mus musculus GN=Pafah1b2 PE=1 SV=2	5.5	25752.5	430.092	Q61206	3	22.71	0.0024	PA1B2_MOUSE	59.9244	60.4716	175.818	38.0709	31.4755	34.2327	61.3508	53.1281	79.4949		32.2942	32.6598	59.9019	65.1789
Pgrmc1	Membrane-associated progesterone receptor component 1 OS=Mus musculus GN=Pgrmc1 PE=1 SV=4	4.34	21808.3	1040.61	O55022	4	34.87	0.0024	PGRC1_MOUSE	64.3359	70.8297	58.2032	61.8633	48.5457	51.2283	71.7592	75.3734	56.7728	61.6528	47.5481	49.6783	59.8159	65.0853
Gstm5	Glutathione S-transferase Mu 5 OS=Mus musculus GN=Gstm5 PE=1 SV=1	7	27034.2	886.869	P48774	7	31.7	0.0024	GSTM5_MOUSE	61.7997	62.7235	63.7698	79.1898	48.1193	51.8136	62.9877	66.6509	53.441	71.3852	43.6856	49.9065	59.6227	64.8751
Rps15a	40S ribosomal protein S15a OS=Mus musculus GN=Rps15a PE=1 SV=2	10.6	14953.6	1386.43	P62245	6	50	0.0024	RS15A_MOUSE	71.529	83.1111	51.5062	54.948	60.4819	65.0707	55.1649	64.558	44.6373	49.4421	53.7105	60.757	59.5764	64.8247
Fndc9	Fibronectin type III domain-containing protein 9 OS=Mus musculus GN=Fndc9 PE=2 SV=1	5.51	26112.6	503.325	Q8BJN4	2	25.22	0.0024	FNDC9_MOUSE	47.2028	59.6658			58.8969	21.5944	42.8528	87.526	125.513			32.243	59.4369	64.6728
Mcts1	Malignant T-cell-amplified sequence 1 OS=Mus musculus GN=Mcts1 PE=2 SV=1	9.12	20783.4	2713.98	Q9DB27	8	58.01	0	MCTS1_MOUSE	50.9781	49.7063	64.3868	73.5353	51.9592	53.6989	51.6203	60.2859	72.6335	72.3285	50.6318	60.8183	59.3819	64.6131
Plekhb1	Pleckstrin homology domain-containing family B member 1 OS=Mus musculus GN=Plekhb1 PE=1 SV=1	6.58	27739.3	826.41	Q9QYE9	6	33.74	0.0024	PKHB1_MOUSE	66.2534	65.2169	43.5867	49.7559	65.8046	62.9618	71.5615	64.981	43.0642	50.8126	62.9308	65.2305	59.3467	64.5747
Ndufb8	NADH dehydrogenase [ubiquinone] 1 beta subcomplex subunit 8, mitochondrial OS=Mus musculus GN=Ndufb8 PE=1 SV=1	6.17	21932.9	913.471	Q9D6J5	5	36.02	0.0024	NDUB8_MOUSE	67.0559	86.2398	52.8846	65.1776	58.425	55.7272	65.9123	61.0497	47.3575	42.2887	57.328	52.7064	59.3461	64.574
	Ig kappa chain V-II region 26-10 OS=Mus musculus PE=1 SV=1	9.26	12386.9	1263.88	P01631	2	32.74	0.0024	KV2A7_MOUSE	66.2745	67.5666	68.1641	78.9839	35.0403	32.1463	58.6935	59.524	71.6117	69.9316	47.5195	55.221	59.2231	64.4402
Ssr3	Translocon-associated protein subunit gamma OS=Mus musculus GN=Ssr3 PE=1 SV=1	9.98	21064.5	220.91	Q9DCF9	2	11.35	0.003	SSRG_MOUSE	71.688	68.4116	53.2598	69.2723	56.2468	57.0595	56.2722	66.8351	54.6951	52.7018	51.9348	48.8626	58.9366	64.1286
Myadm	Myeloid-associated differentiation marker OS=Mus musculus GN=Myadm PE=2 SV=2	8.23	36026	547.793	O35682	3	10.31	0.0024	MYADM_MOUSE	64.0501	61.0495	61.3953	58.8653	55.1921	50.955	61.433	63.6565	45.6819	67.1023	55.3185	62.3487	58.9207	64.1112
Blvrb	Flavin reductase (NADPH) OS=Mus musculus GN=Blvrb PE=2 SV=3	6.55	22311.4	707.016	Q923D2	4	33.98	0.0024	BLVRB_MOUSE	58.858	69.2191	66.5183	80.8122	42.1619	43.9904	59.9946	73.3219	70.0751	84.2264	28.6118	27.4225	58.7677	63.9447
Gna13	Guanine nucleotide-binding protein subunit alpha-13 OS=Mus musculus GN=Gna13 PE=1 SV=1	8.25	44396.9	1196	P27601	6	21.75	0.0024	GNA13_MOUSE	63.1654	59.2794	39.4364	55.4416	64.191	55.874	67.6529	68.0515	51.8152	48.4037	67.6841	59.5973	58.3827	63.5258
Ak1	Adenylate kinase isoenzyme 1 OS=Mus musculus GN=Ak1 PE=1 SV=1	5.51	21653.7	677.964	Q9R0Y5	5	33.51	0.0024	KAD1_MOUSE	90.5726	78.0473	35.1363	39.4731	64.4816	57.2347	57.0864	76.2616	32.1659	31.8633	56.0031	74.5157	57.7368	62.823
Rps11	40S ribosomal protein S11 OS=Mus musculus GN=Rps11 PE=1 SV=3	10.71	18601.8	1171.64	P62281	4	31.01	0.0024	RS11_MOUSE	55.6828	64.3912	45.2158	53.8932	62.6081	64.9199	57.104	67.4605	37.1225	49.4902	64.1686	69.9751	57.6693	62.7496
Psma6	Proteasome subunit alpha type-6 OS=Mus musculus GN=Psma6 PE=1 SV=1	6.36	27828.7	332.482	Q9QUM9	3	19.11	0.0024	PSA6_MOUSE	60.6528	62.1867	69.4023	72.1774	41.726	44.624	53.698	65.7164	57.949	76.3466	41.4467	42.6879	57.3845	62.4397
Rpl24	60S ribosomal protein L24 OS=Mus musculus GN=Rpl24 PE=1 SV=2	11.69	17893	1069.34	Q8BP67	5	30.57	0.0024	RL24_MOUSE	68.7609	63.3009	39.0238	52.3672	68.9252	68.6155	64.4393	62.0277	32.3565	50.4855	58.502	59.0403	57.3204	62.3699
Timm50	Mitochondrial import inner membrane translocase subunit TIM50 OS=Mus musculus GN=Timm50 PE=1 SV=1	8.21	40004.6	335.962	Q9D880	2	7.93	0.0024	TIM50_MOUSE	64.3831	54.0282	63.0171	50.8324	57.3995	49.9543	58.3098	59.4522	49.4496	59.0514	54.5198	67.0216	57.2849	62.3313
Ldhc	L-lactate dehydrogenase C chain OS=Mus musculus GN=Ldhc PE=1 SV=2	8.26	36254.1	1705.99	P00342	4	14.46	0.0024	LDHC_MOUSE	51.067	53.5461	51.4596	58.298	63.9234	61.0726	52.0984	51.2672	51.7236	67.5943	60.4097	64.7552	57.2679	62.3129
Apex1	DNA-(apurinic or apyrimidinic site) lyase OS=Mus musculus GN=Apex1 PE=1 SV=2	7.9	35889.6	784.095	P28352	4	21.45	0.0024	APEX1_MOUSE	62.8172	40.087	49.5682	71.4513	81.6513	61.0899	47.1346	38.8737	47.5836	59.9266	65.5392	55.077	56.7333	61.7311
Rpl32	60S ribosomal protein L32 OS=Mus musculus GN=Rpl32 PE=1 SV=2	11.74	15973.9	879.436	P62911	4	33.33	0.0024	RL32_MOUSE	59.0965	49.8331	41.7191	47.4181	71.731	67.1049	64.179	58.032	43.7783	46.5433	69.6902	61.4788	56.717	61.7134
Rps5	40S ribosomal protein S5 OS=Mus musculus GN=Rps5 PE=1 SV=3	10.09	23060.5	998.652	P97461	3	17.16	0.0024	RS5_MOUSE	64.7057	49.7332		66.799	54.8506	45.0662	95.8556	41.0195	29.6986		63.5171	50.2268	56.1472	61.0934
Psma1	Proteasome subunit alpha type-1 OS=Mus musculus GN=Psma1 PE=1 SV=1	5.99	29831.7	489.478	Q9R1P4	4	17.11	0.0024	PSA1_MOUSE	71.2437	70.2578	48.8291	49.6428	53.6618	53.5239	70.315	67.8314	46.0586	40.4957	51.119	49.8521	56.0693	61.0086
Gapdhs	Glyceraldehyde-3-phosphate dehydrogenase, testis-specific OS=Mus musculus GN=Gapdhs PE=2 SV=1	7.8	48398.4	2449.75	Q64467	3	7.27	0	G3PT_MOUSE	61.7613	54.4553	43.3293	45.576	68.0105	69.0943	52.8268	52.4315	42.6256	50.844	65.5323	64.8677	55.9462	60.8747
Cox6c	Cytochrome c oxidase subunit 6C OS=Mus musculus GN=Cox6c PE=1 SV=3	10.5	8469.03	3045.99	Q9CPQ1	4	36.84	0	COX6C_MOUSE	60.193	54.4033	51.4133	58.7811	56.3072	56.3611	56.2676	53.6523	48.5516	62.8347	56.3012	53.0523	55.6765	60.5813
Cox6b1	Cytochrome c oxidase subunit 6B1 OS=Mus musculus GN=Cox6b1 PE=1 SV=2	8.97	10299.6	2506.13	P56391	4	52.33	0	CX6B1_MOUSE	46.0143	117.282	59.5229	76.5724	30.8699	40.0259	43.0618	65.4778	56.212	75.2736	28.1039	28.4948	55.576	60.4718
Rpl31	60S ribosomal protein L31 OS=Mus musculus GN=Rpl31 PE=1 SV=1	10.97	14462.9	1132.36	P62900	3	24.8	0.0024	RL31_MOUSE	49.3925	47.4651	42.294	51.5615	55.5493	51.1915	68.8356	65.6347	45.9528	50.3471	70.2246	67.0641	55.4594	60.345
Erp29	Endoplasmic reticulum resident protein 29 OS=Mus musculus GN=Erp29 PE=1 SV=2	5.8	28880.3	417.878	P57759	4	22.14	0.0024	ERP29_MOUSE	64.7592	79.6278	54.1093	55.7233	53.3862	52.2588	50.5344	56.3805	45.6089	58.7396	45.343	40.926	54.7831	59.6091
Tmed2	Transmembrane emp24 domain-containing protein 2 OS=Mus musculus GN=Tmed2 PE=1 SV=1	4.91	22819.2	375.536	Q9R0Q3	3	16.92	0.0024	TMED2_MOUSE	56.9024	65.7921	38.7824	49.3557	57.1566	64.3147	66.7745	65.5872	33.9433	43.7749	57.8939	54.8821	54.5967	59.4062
Akr1a1	Alcohol dehydrogenase [NADP(+)] OS=Mus musculus GN=Akr1a1 PE=1 SV=3	7.01	36815.1	275.485	Q9JII6	3	8.92	0.003	AK1A1_MOUSE	65.5065	57.9236	50.0638	66.8563	47.6054	46.1417	51.5875	62.215	55.3311	58.3708	44.3743	46.1231	54.3416	59.1287
Pebp1	Phosphatidylethanolamine-binding protein 1 OS=Mus musculus GN=Pebp1 PE=1 SV=3	5.03	21001.6	578.248	P70296	3	37.97	0.0024	PEBP1_MOUSE	62.1391	68.0637	41.1484	78.4101	45.1011	54.8821	67.0543	46.6045	42.4691	48.1191	44.3026	51.9858	54.19	58.9638
Ndufs4	NADH dehydrogenase [ubiquinone] iron-sulfur protein 4, mitochondrial OS=Mus musculus GN=Ndufs4 PE=1 SV=3	10.45	19841.8	976.968	Q9CXZ1	5	30.86	0.0024	NDUS4_MOUSE	71.3934	66.7627	38.7469	55.181	38.852	42.0088	70.7063	75.2718	40.9396	61.0335	40.7438	45.743	53.9486	58.7011
Ndufa5	NADH dehydrogenase [ubiquinone] 1 alpha subcomplex subunit 5 OS=Mus musculus GN=Ndufa5 PE=1 SV=3	8.59	13416.8	1312.51	Q9CPP6	3	27.59	0.0024	NDUA5_MOUSE	45.6153	54.7812	43.9949	59.0341	70.103	49.6896	48.3032	47.845	49.2845	63.5746	50.5825	63.901	53.8924	58.64
Ak3	GTP:AMP phosphotransferase AK3, mitochondrial OS=Mus musculus GN=Ak3 PE=1 SV=3	9.26	25483.4	611.701	Q9WTP7	8	44.93	0.0024	KAD3_MOUSE	67.6143	65.817	42.9905	48.4863	48.1732	52.1745	66.9357	61.7677	39.4306	51.4575	48.6032	52.486	53.828	58.5699
Rps25	40S ribosomal protein S25 OS=Mus musculus GN=Rps25 PE=1 SV=1	10.58	13799.2	865.804	P62852	2	15.2	0.0024	RS25_MOUSE	55.1199	48.3021	44.2629	63.5877	54.4669	65.0648	47.2402	47.3583	45.3466	59.6245	57.5876	57.1959	53.7631	58.4993
Gpx7	Glutathione peroxidase 7 OS=Mus musculus GN=Gpx7 PE=2 SV=1	8.45	21232.2	538.449	Q99LJ6	5	37.63	0.0024	GPX7_MOUSE	55.1268	51.6656	49.8631	54.9324	60.1455	59.1498	43.0228	39.9597	48.3705	56.9408	61.4427	59.0156	53.3029	57.9986
Hspb1	Heat shock protein beta-1 OS=Mus musculus GN=Hspb1 PE=1 SV=3	6.12	23070.9	849.717	P14602	6	33.49	0.0024	HSPB1_MOUSE	74.1821	109.638	38.4972	42.509	38.5627	38.737	58.5488	89.0591	33.1623	43.9377	40.3351	31.6078	53.2314	57.9207
Cisd1	CDGSH iron-sulfur domain-containing protein 1 OS=Mus musculus GN=Cisd1 PE=1 SV=1	9.43	12268.1	2099.01	Q91WS0	3	35.19	0	CISD1_MOUSE	63.8091	55.1847	43.2424	45.2984	48.8968	48.9872	53.5827	66.7709	49.2538	63.3377	48.323	50.5843	53.1059	57.7842
Set	Protein SET OS=Mus musculus GN=Set PE=1 SV=1	4.01	33377.8	326.854	Q9EQU5	3	14.53	0.0024	SET_MOUSE	66.8162	65.3985	56.068		60.5511	40.2904	56.0466	59.9395	32.7778		60.5561	28.7972	52.7241	57.3688
Rpl11	60S ribosomal protein L11 OS=Mus musculus GN=Rpl11 PE=1 SV=4	9.95	20480.5	649.818	Q9CXW4	3	13.48	0.0024	RL11_MOUSE	67.5437	63.5929	50.7697	57.8527	50.5339	50.2378	52.7314	50.5755	46.1029	53.1262	38.5685	50.9473	52.7152	57.3591
Tagln3	Transgelin-3 OS=Mus musculus GN=Tagln3 PE=1 SV=1	7.17	22641.8	2205.27	Q9R1Q8	9	52.76	0	TAGL3_MOUSE	70.2262	59.3622	41.432	45.6605	48.7509	47.0995	74.5124	62.2953	40.9357	54.3543	45.7868	41.0637	52.6233	57.259
Sar1a	GTP-binding protein SAR1a OS=Mus musculus GN=Sar1a PE=2 SV=1	6.51	22485	793.899	P36536	4	44.44	0.0024	SAR1A_MOUSE	89.0471	63.6001			45.2466	45.5603	46.3501	67.1129			22.6656	39.9719	52.4443	57.0643
Hmgb1	High mobility group protein B1 OS=Mus musculus GN=Hmgb1 PE=1 SV=2	5.45	25064.9	246.709	P63158	2	11.63	0.003	HMGB1_MOUSE	45.8277	48.7683	52.9881	55.0611	49.3528	48.7984	50.1671	46.6044	47.746	50.0718	83.0471	48.4405	52.2394	56.8414
Psmb2	Proteasome subunit beta type-2 OS=Mus musculus GN=Psmb2 PE=1 SV=1	6.61	23077.5	351.72	Q9R1P3	2	8.96	0.0024	PSB2_MOUSE	58.5017	70.5868	59.2422	63.5644	41.3434	18.9472	85.2038	60.9856	49.0481	58.8316	39.8292	20.6439	52.2273	56.8282
Nipsnap3b	Protein NipSnap homolog 3B OS=Mus musculus GN=Nipsnap3b PE=1 SV=1	9.78	28422.4	524.47	Q9CQE1	2	8.1	0.0024	NPS3B_MOUSE	77.7895	43.779	39.0272	49.3852	51.9546	36.477	86.5556	49.2206	44.2361	57.3921	49.9442	37.8524	51.9678	56.5458
Vps26a	Vacuolar protein sorting-associated protein 26A OS=Mus musculus GN=Vps26a PE=1 SV=1	6.11	38227.9	437.031	P40336	2	9.48	0.0024	VP26A_MOUSE	53.9582	46.3257	56.3815		50.5805	50.1219	57.3217		59.1889	45.5024	49.5396	50.2463	51.9167	56.4902
Ndrg4	Protein NDRG4 OS=Mus musculus GN=Ndrg4 PE=1 SV=1	5.85	38908.1	297.349	Q8BTG7	2	11.36	0.003	NDRG4_MOUSE	65.0062	55.6096			35.4625	34.733	71.9065	64.4144			35.7053	41.7556	50.5741	55.0294
Rps23	40S ribosomal protein S23 OS=Mus musculus GN=Rps23 PE=1 SV=3	10.96	15978.7	1663.5	P62267	3	34.27	0.0024	RS23_MOUSE	84.4819	52.9048	39.7101	43.6365	46.2772	43.6312	49.0808	39.1375	38.8311	71.473	46.2609	49.3274	50.396	54.8356
Psmd7	26S proteasome non-ATPase regulatory subunit 7 OS=Mus musculus GN=Psmd7 PE=1 SV=2	6.3	36596.9	288.843	P26516	2	10.9	0.003	PSMD7_MOUSE	47.9882	61.7364			49.2004	44.4179	61.9588	54.2322			39.232	42.1524	50.1148	54.5296
Usmg5	Up-regulated during skeletal muscle growth protein 5 OS=Mus musculus GN=Usmg5 PE=1 SV=1	10.16	6438.56	4554.72	Q78IK2	2	43.1	0	USMG5_MOUSE	50.1556	61.2996	35.4914	52.4501	54.2516	36.3593	55.0332	63.4086	45.2638	39.864	64.44	40.5066	49.877	54.2708
Rpl30	60S ribosomal protein L30 OS=Mus musculus GN=Rpl30 PE=3 SV=2	9.95	12955.2	3476.96	P62889	3	37.39	0	RL30_MOUSE	52.6894	49.9912	38.1122	49.1392	54.579	52.1074	52.9506	48.5315	38.6806	49.169	53.3249	58.0865	49.7801	54.1654
Rpl36	60S ribosomal protein L36 OS=Mus musculus GN=Rpl36 PE=3 SV=2	11.76	12272.6	1289.7	P47964	3	19.05	0.0024	RL36_MOUSE	50.9026	48.3305	43.4066	51.635	51.6591	50.3833	49.9398	45.7511	40.2034	50.0704	54.6862	53.5754	49.2119	53.5472
Atp5i	ATP synthase subunit e, mitochondrial OS=Mus musculus GN=Atp5i PE=1 SV=2	9.74	8235.62	3354.64	Q06185	3	50.7	0	ATP5I_MOUSE	48.3939	71.2838	41.405	52.2581	40.2596	44.6643	40.8233	67.7862	40.174	53.2206	40.4995	47.1103	48.9899	53.3056
Stx7	Syntaxin-7 OS=Mus musculus GN=Stx7 PE=1 SV=3	5.46	29991.8	583.594	O70439	5	29.89	0.0024	STX7_MOUSE	51.9498	50.8097	33.4998	42.285	53.2413	52.4245	48.4089	65.9702	39.8448	39.5347	48.6243	53.9123	48.3754	52.637
Cst3	Cystatin-C OS=Mus musculus GN=Cst3 PE=2 SV=2	9.29	15759	919.457	P21460	3	32.86	0.0024	CYTC_MOUSE	45.0594	44.8282	49.4435	59.8266	45.3007	42.5629	44.8559	45.8494	51.1089	54.351	46.9499	50.1465	48.3569	52.6168
Rras	Ras-related protein R-Ras OS=Mus musculus GN=Rras PE=2 SV=1	6.37	23935	872.436	P10833	4	28.44	0.0024	RRAS_MOUSE	51.532	51.5947	35.1955	49.3634	49.6445	52.1778	51.1979	56.6319	35.1356	45.7263	48.857	52.662	48.3099	52.5657
Ufd1l	Ubiquitin fusion degradation protein 1 homolog OS=Mus musculus GN=Ufd1l PE=1 SV=2	6.27	34766.6	338.481	P70362	4	19.87	0.0024	UFD1_MOUSE	49.0852	44.2635	49.7417	48.8029	53.1923	41.6108	44.1511	51.7458	54.0828	51.7614	45.4667	42.6146	48.0432	52.2755
Ndufb4	NADH dehydrogenase [ubiquinone] 1 beta subcomplex subunit 4 OS=Mus musculus GN=Ndufb4 PE=1 SV=3	10.16	15081.3	1721.35	Q9CQC7	3	35.66	0.0024	NDUB4_MOUSE	54.1076	51.482	37.4783	49.8299	47.9872	47.2674	52.6946	47.1455	41.4097	46.6575	49.0868	49.0765	47.8519	52.0673
Sri	Sorcin OS=Mus musculus GN=Sri PE=1 SV=1	5.16	21912.4	724.41	Q6P069	5	30.81	0.0024	SORCN_MOUSE	80.5044	79.1742	29.7676	35.3098	33.0426	37.2985	80.2195	69.484	22.2697	33.7971	34.8608	35.8118	47.6283	51.8241
Cox7a2	Cytochrome c oxidase subunit 7A2, mitochondrial OS=Mus musculus GN=Cox7a2 PE=1 SV=2	10.66	9290.91	1624.55	P48771	2	27.71	0.0024	CX7A2_MOUSE	46.039	68.6091	53.1022	56.1982	29.5335	48.4933	37.3328	59.2674	46.5812	55.3732	30.7099	39.321	47.5467	51.7353
Ppp1ca	Serine/threonine-protein phosphatase PP1-alpha catalytic subunit OS=Mus musculus GN=Ppp1ca PE=1 SV=1	5.89	38281.5	907.793	P62137	8	29.09	0.0024	PP1A_MOUSE	59.1517	45.4976	41.3262	47.6767	53.8261	47.0305	49.6755	50.7015	38.7969	42.3734	36.5414	41.5433	46.1784	50.2464
Gpx3	Glutathione peroxidase 3 OS=Mus musculus GN=Gpx3 PE=2 SV=2	8.39	25445.2	509.202	P46412	4	23.89	0.0024	GPX3_MOUSE	67.3899	57.5312	41.3507	44.1014	42.1707	36.9924	56.0996	52.2718	30.4494	40.7555	38.4507	42.641	45.8504	49.8895
Fam177a1	Protein FAM177A1 OS=Mus musculus GN=Fam177a1 PE=2 SV=1	4.33	23749.3	626.877	Q8BR63	5	36.23	0.0024	F177A_MOUSE	59.7592	54.6526	39.083	39.8408	41.5933	41.1729	50.7928	54.697	42.904	36.1485	44.0481	42.9558	45.6373	49.6577
Ube2i	SUMO-conjugating enzyme UBC9 OS=Mus musculus GN=Ube2i PE=1 SV=1	8.9	18235	594.59	P63280	4	25.95	0.0024	UBC9_MOUSE	29.3428	56.0131	52.666	50.7825	31.743	34.0821	35.0955	39.821	78.1697	54.9671	35.8329	44.2836	45.2333	49.218
Arl6ip5	PRA1 family protein 3 OS=Mus musculus GN=Arl6ip5 PE=1 SV=2	9.96	21557.8	395.168	Q8R5J9	2	9.57	0.0024	PRAF3_MOUSE	48.2378	50.4745	36.7687	37.5406	48.1433	50.7775	49.0215	47.3421	35.588	42.119	48.1393	47.9297	45.1735	49.153
Vps29	Vacuolar protein sorting-associated protein 29 OS=Mus musculus GN=Vps29 PE=1 SV=1	6.32	20666.8	535.292	Q9QZ88	3	26.92	0.0024	VPS29_MOUSE	43.7001	43.2859	45.2077	52.1317	44.5867	48.7563	47.1744	43.2857	42.4983	50.4038	36.1275	41.3443	44.8752	48.8284
Map1lc3b	Microtubule-associated proteins 1A/1B light chain 3B OS=Mus musculus GN=Map1lc3b PE=1 SV=3	9.12	14616.9	918.94	Q9CQV6	3	22.4	0.0024	MLP3B_MOUSE	52.9484	50.7208	41.6018	51.0012	37.6801	38.4832	51.2166	52.7914	39.0648	48.2794	34.849	38.3698	44.7505	48.6928
Gamt	Guanidinoacetate N-methyltransferase OS=Mus musculus GN=Gamt PE=2 SV=1	5.34	26621.3	526.117	O35969	3	22.46	0.0024	GAMT_MOUSE	63.3704	56.9374			27.9919	34.4	52.3882	64.161			29.8549	26.8152	44.4899	48.4091
Napb	Beta-soluble NSF attachment protein OS=Mus musculus GN=Napb PE=1 SV=2	5.17	33899.2	518.807	P28663	3	12.75	0.0024	SNAB_MOUSE	54.3329	52.4648	26.8186	39.0262	49.3581	42.1889	58.0244	50.8383	25.9097	38.7312	49.2682	45.4728	44.3695	48.2782
Lyz2	Lysozyme C-2 OS=Mus musculus GN=Lyz2 PE=1 SV=2	8.87	17145.2	606.144	P08905	3	31.76	0.0024	LYZ2_MOUSE	44.0859	55.806	49.1003	68.2191	33.6143	33.5251	39.9927	38.8957	41.8851	55.8738	33.5445	36.15	44.2244	48.1202
Rps26	40S ribosomal protein S26 OS=Mus musculus GN=Rps26 PE=3 SV=3	11.42	13300.6	691.648	P62855	2	20.87	0.0024	RS26_MOUSE	51.6986	51.8291	35.363	41.6939	42.5664	51.6708	44.3544	45.1568	30.0253	40.911	44.8537	43.0311	43.5962	47.4367
Skp1	S-phase kinase-associated protein 1 OS=Mus musculus GN=Skp1 PE=1 SV=3	4.2	18843.1	1826.39	Q9WTX5	4	34.36	0	SKP1_MOUSE	47.1404	105.171	30.0832	33.683	34.6329	30.539	51.5905	73.9367	23.9063	28.5986	29.5843	29.2239	43.1742	46.9775
Comt	Catechol O-methyltransferase OS=Mus musculus GN=Comt PE=1 SV=2	5.42	29714.5	310.984	O88587	3	18.49	0.003	COMT_MOUSE	53.1959	43.4342			55.0686	32.751	40.8216	44.3949			38.2719	37.2472	43.1482	46.9492
Efnb1	Ephrin-B1 OS=Mus musculus GN=Efnb1 PE=1 SV=1	9.24	38258.6	319.36	P52795	2	8.99	0.003	EFNB1_MOUSE	46.5272				48.4134	38.9041	40.8634	37.9682			41.2152	47.458	43.0499	46.8423
Prdx4	Peroxiredoxin-4 OS=Mus musculus GN=Prdx4 PE=1 SV=1	6.76	31280.7	3818.9	O08807	4	24.82	0	PRDX4_MOUSE	39.7864	44.9216	37.6965	46.5081	46.4908	42.6145	37.5565	43.3718	40.8106	52.2468	42.3398	41.2672	42.9675	46.7527
Atp5l	ATP synthase subunit g, mitochondrial OS=Mus musculus GN=Atp5l PE=1 SV=1	10.13	11424.5	873.97	Q9CPQ8	3	33.98	0.0024	ATP5L_MOUSE	53.4837	46.9123	33.2988	44.016	48.4775	52.2645	43.6595	38.1801	31.4728	38.7067	42.4035	42.5403	42.9513	46.735
Pgls	6-phosphogluconolactonase OS=Mus musculus GN=Pgls PE=2 SV=1	5.45	27482.6	602.275	Q9CQ60	2	16.34	0.0024	6PGL_MOUSE	56.8846	47.4081			24.3904	20.7486	86.8716	57.7429			27.9571	19.3623	42.6707	46.4297
Lrrc57	Leucine-rich repeat-containing protein 57 OS=Mus musculus GN=Lrrc57 PE=2 SV=1	8.4	27159.4	509.691	Q9D1G5	4	19.67	0.0024	LRC57_MOUSE	40.2122	35.626	39.4321	43.4932	39.6043	46.6422	43.6052	41.6748	27.4744	45.834	56.1402	47.5427	42.2734	45.9974
Cdipt	CDP-diacylglycerol--inositol 3-phosphatidyltransferase OS=Mus musculus GN=Cdipt PE=1 SV=1	8.28	23941.1	480.058	Q8VDP6	3	15.96	0.0024	CDIPT_MOUSE	47.7229	42.2397	38.9815	40.2914	40.9652	42.0747	46.9315	45.7142	31.1546	39.5453	44.1039	42.3203	41.8371	45.5227
Vamp3	Vesicle-associated membrane protein 3 OS=Mus musculus GN=Vamp3 PE=1 SV=1	8.92	11594.3	1084.92	P63024	3	38.83	0.0024	VAMP3_MOUSE	60.2824	59.5474	30.7389	38.0798	38.0527	35.4388	45.332	51.4388	29.3727	37.6563	35.7748	37.6041	41.6099	45.2754
Gstk1	Glutathione S-transferase kappa 1 OS=Mus musculus GN=Gstk1 PE=1 SV=3	9.23	25818.2	410.633	Q9DCM2	3	19.03	0.0024	GSTK1_MOUSE	44.8424	38.1348	41.003	39.1113	36.4056	40.2973	48.9753	42.2217	43.6624	48.2748	31.6274	37.1394	40.9746	44.5842
Rab22a	Ras-related protein Rab-22A OS=Mus musculus GN=Rab22a PE=1 SV=2	8.25	22030.1	415.771	P35285	2	16.49	0.0024	RB22A_MOUSE	29.9352	49.2131	32.031	43.0737	47.228	43.8504	42.9869	38.7987	26.2096	43.7121	48.2714	46.3561	40.9722	44.5816
Nras	GTPase NRas OS=Mus musculus GN=Nras PE=2 SV=1	4.82	21484.3	1622.43	P08556	7	53.97	0.0024	RASN_MOUSE	47.0327	58.2478	17.7466	45.8344	34.6862	35.8381	52.2202	59.32	12.1113	53.6992	34.1147	37.702	40.7128	44.2993
Arl1	ADP-ribosylation factor-like protein 1 OS=Mus musculus GN=Arl1 PE=2 SV=1	5.45	20525.7	831.069	P61211	3	26.52	0.0024	ARL1_MOUSE	46.3085	41.9478	32.6907	43.7476	37.5268	35.3764	58.1371	45.5364	32.0769	34.22	46.8634	33.0922	40.627	44.2059
Smco3	Single-pass membrane and coiled-coil domain-containing protein 3 OS=Mus musculus GN=Smco3 PE=2 SV=1	9.13	24958	425.01	Q8BQM7	3	22.22	0.0024	SMCO3_MOUSE	35.3095	37.1244	40.8546	41.1133	51.7784	42.3287	36.7354	29.0323	40.5973	41.5133	45.3901	44.385	40.5135	44.0825
Lgals1	Galectin-1 OS=Mus musculus GN=Lgals1 PE=1 SV=3	5.14	15208	1050.97	P16045	3	28.89	0.0024	LEG1_MOUSE	42.3465	51.4628					39.3002	48.3718		20.0704			40.3103	43.8614
Ndufa2	NADH dehydrogenase [ubiquinone] 1 alpha subcomplex subunit 2 OS=Mus musculus GN=Ndufa2 PE=1 SV=3	10.4	11029.7	1974.23	Q9CQ75	3	30.3	0	NDUA2_MOUSE	45.7758	43.333	42.3178	45.9817	38.7678	39.1406	34.7654	38.1742	38.177	50.407	29.1858	36.592	40.2182	43.7611
Mgst3	Microsomal glutathione S-transferase 3 OS=Mus musculus GN=Mgst3 PE=1 SV=1	9.67	17128.9	876.175	Q9CPU4	2	23.53	0.0024	MGST3_MOUSE	52.3539	42.8996	30.2058	33.9849	41.4432	39.1407	41.8919	44.0149	29.6986	38.4608	40.3167	40.7933	39.6004	43.0889
Gpx1	Glutathione peroxidase 1 OS=Mus musculus GN=Gpx1 PE=1 SV=2	7.03	22407.4	483.872	P11352	5	31.84	0.0024	GPX1_MOUSE	46.9927	43.7104		49.7317	49.7231	26.6262	44.4938	47.1007	46.9838	30.1412	32.4267	17.3234	39.5685	43.0542
Tomm34	Mitochondrial import receptor subunit TOM34 OS=Mus musculus GN=Tomm34 PE=2 SV=1	9.42	34677.3	474.653	Q9CYG7	4	15.53	0.0024	TOM34_MOUSE	39.4519	40.8016			38.132	44.9015	34.601	39.4287	32.1659	38.0167	39.5945	45.5832	39.2677	42.7269
Hint1	Histidine triad nucleotide-binding protein 1 OS=Mus musculus GN=Hint1 PE=1 SV=3	6.41	13891	3043.47	P70349	3	46.03	0	HINT1_MOUSE	38.4505	68.0728	33.9522	44.8072	26.1279	37.3373	30.4333	59.9409	29.623	45.0832	23.4094	33.9666	39.267	42.7262
Rpl29	60S ribosomal protein L29 OS=Mus musculus GN=Rpl29 PE=2 SV=2	12.25	17644	348.337	P47915	2	11.88	0.0024	RL29_MOUSE	44.6894	37.5255	29.5893	35.957	44.0829	42.9809	47.831	37.8719	31.2678	35.1725	42.8383	40.5859	39.1994	42.6526
Mdp1	Magnesium-dependent phosphatase 1 OS=Mus musculus GN=Mdp1 PE=1 SV=1	6.33	18639.3	870.156	Q9D967	5	54.27	0.0024	MGDP1_MOUSE	43.2822	39.6154	37.6242	34.2982	37.7469	30.4261	48.7436	41.0871	39.0974	41.7444	43.0563	32.6822	39.117	42.5629
Ptges3	Prostaglandin E synthase 3 OS=Mus musculus GN=Ptges3 PE=1 SV=1	4.14	19006.6	472.163	Q9R0Q7	2	12.5	0.0024	TEBP_MOUSE	49.7348	48.6679		32.484	35.8206	44.3541	26.3875	28.4686		35.7728	35.1347	52.7616	38.9587	42.3907
Ap2s1	AP-2 complex subunit sigma OS=Mus musculus GN=Ap2s1 PE=1 SV=1	5.76	17188.8	588.838	P62743	2	15.49	0.0024	AP2S1_MOUSE	43.4053	44.384	30.5391	32.1669	38.8911	40.4017	39.1938	45.101	29.6061	40.4162	37.4424	40.775	38.5269	41.9208
Rpl28	60S ribosomal protein L28 OS=Mus musculus GN=Rpl28 PE=1 SV=2	12.42	15790.5	963.945	P41105	2	16.06	0.0024	RL28_MOUSE	40.5051	39.1505	28.473	37.2505	45.6756	40.2284	40.1713	40.089	24.7831	39.5919	41.5143	40.749	38.1818	41.5454
Fabp5	Fatty acid-binding protein, epidermal OS=Mus musculus GN=Fabp5 PE=1 SV=3	6.14	15479.6	1034.8	Q05816	5	49.63	0.0024	FABP5_MOUSE	23.7099	36.0931	107.431	22.777	19.8947	28.0358	23.1273	35.3219	90.5074	25.1394	19.764	26.02	38.1518	41.5127
Ndufb3	NADH dehydrogenase [ubiquinone] 1 beta subcomplex subunit 3 OS=Mus musculus GN=Ndufb3 PE=1 SV=1	9.55	11692.2	1567.38	Q9CQZ6	2	11.54	0.0024	NDUB3_MOUSE	56.7239	54.0371	35.9643	37.9606	30.5934	34.4212	37.5094	47.251	22.0524	45.1024	24.6056	29.2851	37.9589	41.3028
Ndufb7	NADH dehydrogenase [ubiquinone] 1 beta subcomplex subunit 7 OS=Mus musculus GN=Ndufb7 PE=1 SV=3	8.26	16558.9	316.895	Q9CR61	2	18.98	0.003	NDUB7_MOUSE	37.2808	40.2283	39.6344	47.2653	35.0631	33.8734	37.1555	37.5499	44.6543	30.5727	34.4813	37.0705	37.9024	41.2414
Rab6b	Ras-related protein Rab-6B OS=Mus musculus GN=Rab6b PE=1 SV=1	5.22	23575.8	1781.44	P61294	8	47.6	0	RAB6B_MOUSE	44.8772	52.1069	33.9794	33.8381	35.5311	32.027	40.3548	48.3535	34.0967	33.2032	32.9722	32.9726	37.8594	41.1945
Arl3	ADP-ribosylation factor-like protein 3 OS=Mus musculus GN=Arl3 PE=1 SV=1	7.09	20657.6	601.755	Q9WUL7	3	28.57	0.0024	ARL3_MOUSE	47.669	49.4336			37.6194	39.579	47.2512	45.4923	20.4946	24.4135	33.3777	32.1347	37.7465	41.0717
Ybx3	Y-box-binding protein 3 OS=Mus musculus GN=Ybx3 PE=1 SV=2	9.95	38813.6	329.188	Q9JKB3	2	9.97	0.0024	YBOX3_MOUSE	46.3125	44.931		37.4977	36.6783	32.4117	43.0192	49.2313	12.81	35.9455	34.8588	36.5987	37.2995	40.5854
Rer1	Protein RER1 OS=Mus musculus GN=Rer1 PE=1 SV=1	9.77	23102.1	466.475	Q9CQU3	2	14.8	0.0024	RER1_MOUSE	41.0898	40.3914	27.809	31.0876	41.3486	38.5835	39.456	37.1742	26.072	26.4482	44.0159	45.4511	36.5773	39.7995
Ndufb11	NADH dehydrogenase [ubiquinone] 1 beta subcomplex subunit 11, mitochondrial OS=Mus musculus GN=Ndufb11 PE=1 SV=2	4.92	17500.8	814.044	O09111	4	37.09	0.0024	NDUBB_MOUSE	38.9482	34.8226	36.7982	37.3275	35.9257	37.303	35.5225	30.2162	45.7299	33.3477	35.1135	36.2128	36.439	39.649
Ndufa6	NADH dehydrogenase [ubiquinone] 1 alpha subcomplex subunit 6 OS=Mus musculus GN=Ndufa6 PE=1 SV=1	10.52	15282.8	655.281	Q9CQZ5	3	31.3	0.0024	NDUA6_MOUSE	43.2837	41.6064	31.5771	37.8396	31.5927	32.8378	48.769	35.9635	31.6906	34.4551	26.0708	34.6126	35.8582	39.0171
Rpl26	60S ribosomal protein L26 OS=Mus musculus GN=Rpl26 PE=1 SV=1	10.98	17258.2	1135.24	P61255	3	17.24	0.0024	RL26_MOUSE	33.3696	33.4922	30.9812	46.6067	36.4566	40.7643	33.871	36.7869	32.5388	34.2439	34.7672	34.5774	35.7046	38.85
Ppp1cc	Serine/threonine-protein phosphatase PP1-gamma catalytic subunit OS=Mus musculus GN=Ppp1cc PE=1 SV=1	6.1	37725.2	889.282	P63087	8	29.72	0.0024	PP1G_MOUSE	41.6871	33.3434	37.738	34.9403	40.6912	39.4894	31.5096	44.1559	28.4327	31.0538	34.3797	30.4454	35.6556	38.7966
Idh1	Isocitrate dehydrogenase [NADP] cytoplasmic OS=Mus musculus GN=Idh1 PE=1 SV=2	6.79	47073.7	216.893	O88844	2	3.86	0.003	IDHC_MOUSE	35.4678	18.1495	38.6868	22.3535	30.0967	33.5055	39.871	59.3299	30.6173	48.1367	34.6838	34.561	35.455	38.5783
Pitpnb	Phosphatidylinositol transfer protein beta isoform OS=Mus musculus GN=Pitpnb PE=1 SV=2	6.51	31772.2	337.951	P53811	4	24.72	0.0024	PIPNB_MOUSE	62.656	60.6768	11.6055	13.6867	32.3715	36.0403	55.6617	57.0336	10.5966	13.1342	35.9771	33.6156	35.2546	38.3603
Glipr2	Golgi-associated plant pathogenesis-related protein 1 OS=Mus musculus GN=Glipr2 PE=2 SV=3	9.87	17204.2	1294.67	Q9CYL5	4	42.21	0.0024	GAPR1_MOUSE	39.1502	39.9206	23.5274	35.1599	39.7948	39.364	38.6413	37.7246	25.088	29.1862	38.2135	35.9982	35.1474	38.2437
Atp6v1g1	V-type proton ATPase subunit G 1 OS=Mus musculus GN=Atp6v1g1 PE=2 SV=3	8.22	13838.5	937.166	Q9CR51	2	23.73	0.0024	VATG1_MOUSE	28.4425	37.8516	45.9226	47.1534	24.0772	24.6613	28.0521	45.4675	35.7462	38.2104		26.4712	34.7324	37.792
Fis1	Mitochondrial fission 1 protein OS=Mus musculus GN=Fis1 PE=1 SV=1	8.97	17065.7	1241.98	Q9CQ92	4	31.58	0.0024	FIS1_MOUSE	36.571	39.9386	24.1429	33.2535	32.0571	34.5795	38.0071	37.1507	30.6272	37.1554	37.2155	34.5589	34.6048	37.6532
Anp32a	Acidic leucine-rich nuclear phosphoprotein 32 family member A OS=Mus musculus GN=Anp32a PE=1 SV=1	3.77	28708.7	215.216	O35381	2	9.72	0.003	AN32A_MOUSE	31.4265	41.532	14.5958	25.6526	54.0985	53.5726	32.5584	30.7864	18.6157	24.4493	41.9194	42.7395	34.3289	37.353
Ndufb6	NADH dehydrogenase [ubiquinone] 1 beta subcomplex subunit 6 OS=Mus musculus GN=Ndufb6 PE=1 SV=3	10.08	15515.1	524.362	Q3UIU2	2	19.53	0.0024	NDUB6_MOUSE	36.7281	29.8585	32.2264	29.7269	32.5702	38.0407	34.4858	32.021	40.6611	39.995	34.0831	30.0728	34.2058	37.2191
	UPF0568 protein C14orf166 homolog OS=Mus musculus PE=2 SV=1	6.44	28266.3	245.312	Q9CQE8	2	12.3	0.003	CN166_MOUSE	35.6789	39.2112	31.1094		38.5064	23.5995				35.5615	29.8449	39.7721	34.1605	37.1698
Sec61b	Protein transport protein Sec61 subunit beta OS=Mus musculus GN=Sec61b PE=1 SV=3	11.97	10015.5	693.487	Q9CQS8	2	21.88	0.0024	SC61B_MOUSE	41.1737	39.7515	17.7525	31.5308	37.7986	37.2086	40.1785	36.5028	15.7327	28.8274	39.0199	38.7523	33.6858	36.6533
Rab3a	Ras-related protein Rab-3A OS=Mus musculus GN=Rab3a PE=1 SV=1	4.66	25198	1717.81	P63011	3	19.55	0.0024	RAB3A_MOUSE	36.1615	34.5202			34.0857	28.4526	39.8804	34.1075			30.8982	28.7956	33.3627	36.3017
Bax	Apoptosis regulator BAX OS=Mus musculus GN=Bax PE=1 SV=1	4.66	21508.7	341.803	Q07813	3	19.27	0.0024	BAX_MOUSE	36.5009	32.6816			30.2564	26.0034	37.0002	32.4552			30.4926	31.3144	32.0881	34.9148
Ndufa12	NADH dehydrogenase [ubiquinone] 1 alpha subcomplex subunit 12 OS=Mus musculus GN=Ndufa12 PE=2 SV=2	9.67	17143.5	665.738	Q7TMF3	4	38.62	0.0024	NDUAC_MOUSE	32.6538	34.2594	27.9532	37.1521	33.931	32.0156	28.7906	29.4452	28.343	34.2209	32.874	27.8954	31.6279	34.4141
Dad1	Dolichyl-diphosphooligosaccharide--protein glycosyltransferase subunit DAD1 OS=Mus musculus GN=Dad1 PE=3 SV=3	6.92	12667.8	1080.93	P61804	2	19.47	0.0024	DAD1_MOUSE	39.8964	35.6739	25.9017	25.2069	35.3134	33.8292	30.6789	35.9954	24.5226	23.3935	32.2978	36.708	31.6181	34.4035
Rab2b	Ras-related protein Rab-2B OS=Mus musculus GN=Rab2b PE=2 SV=1	6.23	24483.6	2776.66	P59279	10	52.31	0	RAB2B_MOUSE	30.1466	30.3353	32.2478	35.1776	28.3744	29.2679	29.9416	31.05	30.8485	35.1552	32.3688	33.9613	31.5729	34.3543
Rps17	40S ribosomal protein S17 OS=Mus musculus GN=Rps17 PE=1 SV=2	10.24	15581.1	1295.48	P63276	3	32.59	0.0024	RS17_MOUSE	31.7809	28.1489	23.1251	28.9486	41.3158	39.273	22.7917	28.7131	20.6877	24.7641	43.5755	44.1006	31.4354	34.2047
Atp6v1d	V-type proton ATPase subunit D OS=Mus musculus GN=Atp6v1d PE=1 SV=1	9.88	28369.1	439.851	P57746	2	15.38	0.0024	VATD_MOUSE	32.5327				29.6573	30.506	32.6873	30.9088	28.6314		32.2359	33.0077	31.2709	34.0256
Gypc	Glycophorin-C OS=Mus musculus GN=Gypc PE=3 SV=2	5.05	10386	1911.07	Q78HU7	2	28.42	0	GLPC_MOUSE	35.9685	30.7709	20.9031	28.9026	32.8042	35.0966	31.6216	34.6615	20.3392	29.1416	35.3947	34.2513	30.8213	33.5365
Gng12	Guanine nucleotide-binding protein G(I)/G(S)/G(O) subunit gamma-12 OS=Mus musculus GN=Gng12 PE=1 SV=3	9.48	8111.3	5077.71	Q9DAS9	5	69.44	0	GBG12_MOUSE	30.9862	28.8142	25.8072	29.8783	29.2472	29.478	31.8047	32.4692	27.5167	32.9722	30.131	29.5248	29.8858	32.5185
Hspe1	10 kDa heat shock protein, mitochondrial OS=Mus musculus GN=Hspe1 PE=1 SV=2	9.12	10962.7	1530.61	Q64433	2	23.53	0.0024	CH10_MOUSE		28.7407						28.481					28.6109	31.1313
Hist1h3a	Histone H3.1 OS=Mus musculus GN=Hist1h3a PE=1 SV=2	11.54	15518.2	2321.04	P68433	3	33.82	0	H31_MOUSE	23.8991	34.731	26.2321	26.5299	29.5785	49.1003	23.4455	23.9415	22.872	28.5157	25.2546	27.5492	28.4708	30.9789
Ralb	Ras-related protein Ral-B OS=Mus musculus GN=Ralb PE=2 SV=1	6.24	23463.6	1035.57	Q9JIW9	4	32.04	0.0024	RALB_MOUSE	26.3464	26.1104	22.616	24.6235	29.722	28.7765	36.0915	28.3267	18.6441	21.708	27.0852	30.6758	26.7272	29.0816
Fabp4	Fatty acid-binding protein, adipocyte OS=Mus musculus GN=Fabp4 PE=1 SV=3	8.8	14764	1922.49	P04117	5	31.82	0	FABP4_MOUSE	25.1277	25.2186	25.7728	33.8294	25.9486	24.5033	26.4166	24.1896	24.553	32.7506	26.3313	23.7819	26.5353	28.8729
Sfn	14-3-3 protein sigma OS=Mus musculus GN=Sfn PE=1 SV=2	4.53	27820.1	2918.47	O70456	3	11.69	0	1433S_MOUSE	38.0241	36.0623	14.2734	16.1255	22.6844	21.2895	42.8817	33.3523	14.0066	18.1987	24.2547	24.6515	25.4837	27.7287
Rab4b	Ras-related protein Rab-4B OS=Mus musculus GN=Rab4b PE=2 SV=2	5.7	23914	1680.08	Q91ZR1	5	30.05	0.0024	RAB4B_MOUSE	26.8853	36.9723			18.8347	18.8126	12.8156	26.9533	23.7734	25.8484	31.7051		24.7334	26.9123
Rps27l	40S ribosomal protein S27-like OS=Mus musculus GN=Rps27l PE=3 SV=3	9.83	9819.35	2037.06	Q6ZWY3	3	38.1	0	RS27L_MOUSE	19.8431	24.9562	20.0877	22.103	26.9543	27.0785	20.6789	22.9792	21.2624	22.4037	21.3722	28.2349	23.1628	25.2033
Hist1h1a	Histone H1.1 OS=Mus musculus GN=Hist1h1a PE=1 SV=2	11.42	21785.1	697.801	P43275	2	13.15	0.0024	H11_MOUSE	20.1362	19.1293	14.5214	19.7829	34.2509	30.7074	18.4798	19.6742	13.811	19.028	32.9676	33.0547	22.962	24.9847
Mrps36	28S ribosomal protein S36, mitochondrial OS=Mus musculus GN=Mrps36 PE=1 SV=1	10.47	11100.8	1052.47	Q9CQX8	2	44.12	0.0024	RT36_MOUSE	21.0622	23.3699	19.6917	30.9687	21.4941	15.6948	22.5333	23.5046	20.5079	33.6017	13.4778	22.8461	22.3961	24.369
Rras2	Ras-related protein R-Ras2 OS=Mus musculus GN=Rras2 PE=1 SV=1	5.64	23627.7	819.891	P62071	3	19.12	0.0024	RRAS2_MOUSE	24.4141	23.7311	18.058	24.5161	21.5494	23.336	24.0301	24.5327	17.9957	21.9688	21.6826	22.8307	22.3871	24.3593
Ptms	Parathymosin OS=Mus musculus GN=Ptms PE=1 SV=3	3.96	11429.8	386.124	Q9D0J8	2	22.77	0.0024	PTMS_MOUSE					25.2437	18.7457		13.0121			26.4277	19.3248	20.5508	22.3612
Ubl3	Ubiquitin-like protein 3 OS=Mus musculus GN=Ubl3 PE=1 SV=1	6.49	13294.2	389.12	Q9Z2M6	2	20.51	0.0024	UBL3_MOUSE	15.8632	23.5252	23.0265		17.4957	18.9671	16.6525	15.9309	19.8374	21.9589	17.789	17.8606	18.9915	20.6646
Rab8a	Ras-related protein Rab-8A OS=Mus musculus GN=Rab8a PE=1 SV=2	9.43	23839.3	2344.11	P55258	6	29.95	0	RAB8A_MOUSE	17.13	9.38432	14.5667	15.8166	26.7073	23.3308	23.9602	17.3321	17.1079	11.5774	25.1551	22.4836	18.7127	20.3611
Rap2b	Ras-related protein Rap-2b OS=Mus musculus GN=Rap2b PE=1 SV=1	4.53	20732.5	702.163	P61226	3	20.22	0.0024	RAP2B_MOUSE	15.6359	16.0961	14.8876	17.0704	16.7409	18.9848	15.1041	17.5311	12.7431	13.6155	16.2038	17.205	15.9849	17.393
Gng3	Guanine nucleotide-binding protein G(I)/G(S)/G(O) subunit gamma-3 OS=Mus musculus GN=Gng3 PE=1 SV=1	7.84	8532.89	919.27	P63216	3	69.33	0.0024	GBG3_MOUSE	12.0286	13.2577	12.7456	11.9844	11.8996	12.811	13.4497	10.189	9.85733	11.9973	13.4382	11.9805	12.1366	13.2057
Ndufa3	NADH dehydrogenase [ubiquinone] 1 alpha subcomplex subunit 3 OS=Mus musculus GN=Ndufa3 PE=1 SV=1	9.18	9330.94	1417.74	Q9CQ91	3	50	0.0024	NDUA3_MOUSE	12.2319	13.2256			8.84784	9.87974	12.9189	9.70659	8.51093	11.0131	12.3689	9.73291	10.8436	11.7989
SPIKE	Enolase 1 OS=Saccharomyces cerevisiae (strain ATCC 204508 / S288c) GN=ENO1 PE=1 SV=3	6.15	46873.2	17236.2	P00924	14	50.34	0	ENO1_YEAST	5581.45	5790.44	4958.38	6179.03	4929.95	4148.88	5812.76	5877	4907.55	5941.1	4643.86	4485.27	5271.3
TRYPSIN	Trypsin OS=Sus scrofa PE=1 SV=1	6.91	25093.8	4422.61	P00761	6	32.9	0	TRYP_PIG	2013.33	2112.46	1702.56	2192.5	1689.55	1694.86	2163.81	2099.22	1629.82	2073.81	1533.43	1626.4	1877.64

## Sheet: 4  DRE-UDMSe proteome WT myelin
gene name	description	IEP	mw	max score	accession	reported peptides	sequence coverage	FDR level	entry	WT 1	WT 2	WT 3	WT 4	WT 5	WT 6	WT 7	WT 8	WT 9	WT 10	WT 11	WT 12	AVERAGE WT	AVERAGE WT corr
Prx	Periaxin OS=Mus musculus GN=Prx PE=2 SV=1	8.36	147916	30117	O55103	59	65.71	0	PRAX_MOUSE	101054	106813	88454.2	101793	113289	113858	112575	108441	93820.9	105099	115872	112466	106128	165013
Mpz	Myelin protein P0 OS=Mus musculus GN=Mpz PE=1 SV=1	9.75	27792.9	15298.3	P27573	9	32.66	0	MYP0_MOUSE	90198.5	98922.7	84514.5	101496	93555	79400.4	87183.2	82464.9	80978.6	95961	103660	81134	89955.7	139868
Mbp	Myelin basic protein OS=Mus musculus GN=Mbp PE=1 SV=2	10.05	27167.7	14861.2	P04370	6	21.6	0	MBP_MOUSE	49785.5	59512.7	41391.9	57142.7	49637.4	66965.9	56618.3	46207.5	42466.4	55093.5	72240	52251.3	54109.4	84132.3
Slc44a1	Choline transporter-like protein 1 OS=Mus musculus GN=Slc44a1 PE=1 SV=3	8.72	74606.9	1779.33	Q6X893	14	24.04	0	CTL1_MOUSE	18258.6	18769.5	18090.1	20331.3	13552.8	11750.2	16536.2	17318.8	17962.8	19356.3	12418.4	13458.8	16483.6	25629.7
Sptbn1	Spectrin beta chain, non-erythrocytic 1 OS=Mus musculus GN=Sptbn1 PE=1 SV=2	5.26	275079	2435.76	Q62261	100	55.4	0	SPTB2_MOUSE	5268.69	18441.5	15745.3	26750.7	16191.2	5366.44	5193.04	4998.61	4302.11	22211.7	5190.8	5912.49	11297.7	17566.3
Cd9	CD9 antigen OS=Mus musculus GN=Cd9 PE=1 SV=2	6.96	25828.3	8514.01	P40240	7	28.76	0	CD9_MOUSE	8258.01	9331.1	7788.07	10650.3	11621.8	11808.6	6940.57	9350.47	8341.47	8692.95	10475.5	14834.8	9841.13	15301.5
Tuba4a	Tubulin alpha-4A chain OS=Mus musculus GN=Tuba4a PE=1 SV=1	4.75	50665.8	19322.1	P68368	21	58.93	0	TBA4A_MOUSE	11912.7	11090.7	4905.63	5107.04	10189.2	9867.88	14294.2	9464.28	5252.66	5127.03	10448.6	10693	9029.42	14039.4
Nefm	Neurofilament medium polypeptide OS=Mus musculus GN=Nefm PE=1 SV=4	4.56	96030.3	10100	P08553	39	54.25	0	NFM_MOUSE	11259	10899.9	4987.56	7536.13	9068.69	8787.72	10881	9922.98	5380.93	7530.89	7868.5	9085.65	8600.74	13372.9
Nefl	Neurofilament light polypeptide OS=Mus musculus GN=Nefl PE=1 SV=5	4.41	61565.6	13991.1	P08551	34	63.17	0	NFL_MOUSE	10462.8	9745.66	5377.96	6772.42	7812.9	7742.94	10477.3	8780.89	5448.37	7688.3	6983.52	8310.28	7966.95	12387.4
Sptan1	Spectrin alpha chain, non-erythrocytic 1 OS=Mus musculus GN=Sptan1 PE=1 SV=4	5.04	285396	2559.4	P16546	120	61.33	0	SPTN1_MOUSE	9092.56	7748.56	6295.36	7716.46	7469.36	6814.65	8345.28	8425.6	6958.58	8553.87	8742.86	8387.3	7879.2	12251
Dync1h1	Cytoplasmic dynein 1 heavy chain 1 OS=Mus musculus GN=Dync1h1 PE=1 SV=2	5.98	534784	699.788	Q9JHU4	114	33.07	0	DYHC1_MOUSE	6828.16	8334.32	5566.47	6477.14	9209.46	8802.85	6444.3	7254.21	6144.89	7130.92	10486.3	10419.5	7758.2	12062.9
Cct5	T-complex protein 1 subunit epsilon OS=Mus musculus GN=Cct5 PE=1 SV=1	5.63	60080.5	297.007	P80316	5	15.71	0	TCPE_MOUSE	1916.72	1646.44	33494.9	2544.28	1293.45	1011.66	2060.61	1517.46	31770.7	2861.58	1201.98	1132.86	6871.06	10683.5
Tf	Serotransferrin OS=Mus musculus GN=Tf PE=1 SV=1	6.85	78890.9	9292.59	Q921I1	38	63.85	0	TRFE_MOUSE	6657.47	5517.42	5788.29	8867.41	5394.41	4664.06	5084.93	5718.15	7188.81	8378.64	5478.07	6370.78	6259.04	9731.89
Eef1a1	Elongation factor 1-alpha 1 OS=Mus musculus GN=Eef1a1 PE=1 SV=3	9.34	50456.1	17623.9	P10126	17	61.9	0	EF1A1_MOUSE	4977.41	3795.55	4253.06	4866.69	6626.64	6212.17	4726.1	4327.67	5328.29	5670.66	6754.39	6735.41	5356.17	8328.07
Vim	Vimentin OS=Mus musculus GN=Vim PE=1 SV=3	4.86	53744.8	25042.5	P20152	31	71.46	0	VIME_MOUSE	4851.4	4760.5	4001.69	4470.93	7590.59	6753.06	4626.22	4733	3625.73	3980.29	6745.66	7598.41	5311.46	8258.54
Eno1	Alpha-enolase OS=Mus musculus GN=Eno1 PE=1 SV=3	6.38	47483.1	34889.3	P17182	24	70.51	0	ENOA_MOUSE	5020.6	3961.4	4485.57	5137.68	6123.17	5353.02	4410.62	4112.58	5580.1	6045.29	5919.06	6081.83	5185.91	8063.34
Rdx	Radixin OS=Mus musculus GN=Rdx PE=1 SV=3	5.83	68657	2157.4	P26043	18	35.68	0	RADI_MOUSE	4258.79	3714.2	3499.31	5188.34	6803.68	6418.41	4661.14	3975.89	4276.75	4851.54	6352.14	6946.81	5078.92	7896.98
Anxa2	Annexin A2 OS=Mus musculus GN=Anxa2 PE=1 SV=2	7.69	38961.4	19168.5	P07356	24	69.03	0	ANXA2_MOUSE	5463.66	6954.15	3688.56	3998.1	4945.99	5844.89	5672.83	4683.33	3980.65	4194.46	4689.14	5223.03	4944.9	7688.6
Fasn	Fatty acid synthase OS=Mus musculus GN=Fasn PE=1 SV=2	6.12	275166	1462.06	P19096	78	46.25	0	FAS_MOUSE	3524.41	4342.76	4130.1	5049.31	5059.52	5551.82	3742.57	4252.14	4280.27	4296.12	4306.33	5665.01	4516.7	7022.81
Dpysl2	Dihydropyrimidinase-related protein 2 OS=Mus musculus GN=Dpysl2 PE=1 SV=2	5.92	62676.9	17028	O08553	31	81.47	0	DPYL2_MOUSE	3493.61	3748.86	4281.86	5008.99	4780.56	5138.54	3655.11	3811.69	4370.4	5613.32	4975.64	5320.79	4516.62	7022.68
Col1a2	Collagen alpha-2(I) chain OS=Mus musculus GN=Col1a2 PE=2 SV=2	9.5	130070	792.973	Q01149	8	7.29	0	CO1A2_MOUSE	5152.23	5456.66	2784.05	3805.87	4668.17	4974.54	5324.7	5807.89	2841.34	4057.43	3943.56	4716.98	4461.12	6936.39
Pmp2	Myelin P2 protein OS=Mus musculus GN=Pmp2 PE=2 SV=2	10	15049.5	28736.9	P24526	10	65.15	0	MYP2_MOUSE	3792.65	5033.57	3833.74	4982.01	4365.11	4696.43	4374.98	4361.28	4387.17	4817.53	3867.5	4852.49	4447.04	6914.5
Cnp	2',3'-cyclic-nucleotide 3'-phosphodiesterase OS=Mus musculus GN=Cnp PE=1 SV=3	9.26	47522.6	22435.9	P16330	25	65.95	0	CN37_MOUSE	3955.49	4561.43	2558.56	3255.77	4977.6	5796.94	4753.9	4083.84	2814.06	3243.26	5251.72	5648.17	4241.73	6595.27
Flnb	Filamin-B OS=Mus musculus GN=Flnb PE=1 SV=3	5.34	280277	1096.42	Q80X90	84	50.19	0	FLNB_MOUSE	4796.52	3878.68	3137.46	4042.56	4571.74	4249.78	5095.88	3805.98	3461.26	4021.79	4334.54	4865.54	4188.48	6512.47
Epb41l2	Band 4.1-like protein 2 OS=Mus musculus GN=Epb41l2 PE=1 SV=2	5.15	110453	4414.96	O70318	47	57.19	0	E41L2_MOUSE	4170.5	3807.47	3050.78	3846.5	5032.48	4157.64	4239.2	4017.71	3266.32	3958.59	4141.43	5241.93	4077.55	6339.99
Tkt	Transketolase OS=Mus musculus GN=Tkt PE=1 SV=1	7.23	68314.9	6866.67	P40142	29	72.71	0	TKT_MOUSE	2932.44	2820.72	3731.46	4167.75	4386.91	5274.7	3604.58	2846.14	4007.04	4038.49	4408.94	5436.36	3971.29	6174.79
Tubb5	Tubulin beta-5 chain OS=Mus musculus GN=Tubb5 PE=1 SV=1	4.59	50127.2	27709	P99024	23	69.14	0	TBB5_MOUSE	4784.32	4557.44	2164.07	2426.33	4852.14	4746.87	4523.71	4677.68	1987.98	2330.32	4614.3	4888.17	3879.44	6031.97
Ckb	Creatine kinase B-type OS=Mus musculus GN=Ckb PE=1 SV=1	5.29	42998.5	1579.74	Q04447	12	52.23	0	KCRB_MOUSE	4033.63	5400.08	4233.23	5427.42	2243.12	2263.94	3326.2	5185.17	4796.91	5490.62	1848.08	2078.92	3860.61	6002.69
Dsp	Desmoplakin OS=Mus musculus GN=Dsp PE=1 SV=1	6.38	335365	997.174	E9Q557	28	11.31	0	DESP_MOUSE		579.791	7289.16	1432.8					7777.49	1265.53			3668.95	5704.69
Gapdh	Glyceraldehyde-3-phosphate dehydrogenase OS=Mus musculus GN=Gapdh PE=1 SV=2	8.35	36095.2	15527.2	P16858	14	63.96	0	G3P_MOUSE	3752.21	3223.51	2906.1	2525.19	4731.14	4472.06	3706.24	4103.58	2887.65	2596.69	3815.54	5002.47	3643.53	5665.16
Nefh	Neurofilament heavy polypeptide OS=Mus musculus GN=Nefh PE=1 SV=3	5.56	117280	5297.45	P19246	32	32.2	0	NFH_MOUSE	3919.18	3616.01	2495.21	3895.47	3087.41	2680.5	4268.8	3832.89	2424.79	3129.74	2828.52	3141.87	3276.7	5094.79
Mag	Myelin-associated glycoprotein OS=Mus musculus GN=Mag PE=1 SV=2	4.85	70115.2	2674.47	P20917	12	24.6	0	MAG_MOUSE	3952.52	3475.5	2247.59	2896.38	4161.51	3666.57	3466.29	3592.39	2536.7	2696.8	2706.37	3875.04	3272.81	5088.74
Plp1	Myelin proteolipid protein OS=Mus musculus GN=Plp1 PE=1 SV=2	8.29	30875.6	10661.7	P60202	8	28.16	0	MYPR_MOUSE	3427.81	2848.72	2691	3173.79	3914.91	3615.77	3265.39	3155.95	2662.32	3016.44	3692.04	3777.3	3270.12	5084.57
Plec	Plectin OS=Mus musculus GN=Plec PE=1 SV=3	5.63	536127	515.698	Q9QXS1	96	26.01	0	PLEC_MOUSE	3335.04	3160.08	2595.81	3003.26	3660.25	3503.64	3237.33	3240.36	2675.87	2866.71	3683.86	3751.48	3226.14	5016.18
Map1b	Microtubule-associated protein 1B OS=Mus musculus GN=Map1b PE=1 SV=2	4.57	271510	527.056	P14873	33	20.37	0	MAP1B_MOUSE	4177.17	2567.96	2206.58	2373.34	3647.16	3040.38	4007.45	3002.82	3389.86	3218.56	3645.13	3361.26	3219.8	5006.33
Hspa8	Heat shock cognate 71 kDa protein OS=Mus musculus GN=Hspa8 PE=1 SV=1	5.2	71099.3	8747.67	P63017	29	56.35	0	HSP7C_MOUSE	3405.58	2877.29	2595.31	3124.19	3455.14	3536.7	3407.68	2935.66	2662.13	2911.57	3632.83	3807.22	3195.94	4969.23
Actbl2	Beta-actin-like protein 2 OS=Mus musculus GN=Actbl2 PE=1 SV=1	5.15	42346.5	4285.07	Q8BFZ3	8	24.2	0	ACTBL_MOUSE	3358.14	3061.79	2247.89	2648.96	3416.01	3030.47	3223.88	3319.17	2746.47	2939.44	3265.83	3338.26	3049.69	4741.83
Cltc	Clathrin heavy chain 1 OS=Mus musculus GN=Cltc PE=1 SV=3	5.35	193325	1346.1	Q68FD5	55	47.28	0	CLH1_MOUSE	3047.93	2891.16	1980.5	2122.31	2516.05	2669.54	3233.92	2865.71	1997.7	2277.07	2625.87	2746.52	2581.19	4013.38
Atp5b	ATP synthase subunit beta, mitochondrial OS=Mus musculus GN=Atp5b PE=1 SV=2	5.03	56300.6	9952.63	P56480	22	65.78	0	ATPB_MOUSE	3078.55	2749.67	1817.48	2123.88	2620.5	2801.33	3015.93	2567.94	2154.7	2248.48	2714.03	2864.84	2563.11	3985.27
Prdx1	Peroxiredoxin-1 OS=Mus musculus GN=Prdx1 PE=1 SV=1	8.23	22404.6	16914.9	P35700	12	67.34	0	PRDX1_MOUSE	2298.03	2340.55	2246.41	2492.37	2795.43	2590.95	2520.59	2363.59	2326.63	2230.81	2893.96	2872.72	2497.67	3883.51
Prph	Peripherin OS=Mus musculus GN=Prph PE=1 SV=2	5.25	54381.7	9846.14	P15331	31	67.37	0	PERI_MOUSE	2991.54	2512.3	1472.03	1909.53	2756.46	2948.91	2882.94	2955.46	1550.56	1872.88	2848.36	2881.19	2465.18	3833
Map4	Microtubule-associated protein 4 OS=Mus musculus GN=Map4 PE=1 SV=3	4.7	118000	2861.76	P27546	36	49.24	0	MAP4_MOUSE	2714.5	2527.85	1687.35	2013.7	2961.16	2397.91	2719.25	2713.83	1958.78	2077.8	3042.3	2656.69	2455.93	3818.61
Hspg2	Basement membrane-specific heparan sulfate proteoglycan core protein OS=Mus musculus GN=Hspg2 PE=1 SV=1	5.85	408103	405.188	Q05793	40	17.13	0	PGBM_MOUSE	1981.84	1937.53	2267.57	2672.22	3159.42	2897.14	1908.25	2069.71	2239.27	2564.95	2867.86	2858.62	2452.03	3812.55
Pygb	Glycogen phosphorylase, brain form OS=Mus musculus GN=Pygb PE=1 SV=3	6.27	97414.4	251.604	Q8CI94	5	7.83	0	PYGB_MOUSE	948.133	900.8	11649.4	873.908	242.919	253.417	806.467	701.98	11564.3	721.48	400.716	253.841	2443.12	3798.69
Fn1	Fibronectin OS=Mus musculus GN=Fn1 PE=1 SV=4	5.25	276188	105.774	P11276	2	1.17	0	FINC_MOUSE	2611.63	2241.69	2439.78	2783.01	1670.95	2410.56	2088.27	2224.01	2775.43	3068.61	1836.79	2130.95	2356.81	3664.49
Rtn4	Reticulon-4 OS=Mus musculus GN=Rtn4 PE=1 SV=2	4.27	127127	732.746	Q99P72	10	15.75	0	RTN4_MOUSE	2348.55	2119.5	1834.55	2974.16	2088.68	1971	2584.8	2144.25	2225.99	2940.26	2270.26	2375.24	2323.1	3612.09
Aco2	Aconitate hydratase, mitochondrial OS=Mus musculus GN=Aco2 PE=1 SV=1	7.83	86205	2361.93	Q99KI0	28	53.85	0	ACON_MOUSE	2050.49	1732.68	2484.61	3034.61	1990.37	1799.56	1811.98	1808.94	2821.07	3223.29	2078.18	2155.16	2249.24	3497.25
Atp5a1	ATP synthase subunit alpha, mitochondrial OS=Mus musculus GN=Atp5a1 PE=1 SV=1	9.52	59866.8	7201.92	Q03265	24	58.23	0	ATPA_MOUSE	2203.84	2137.73	1652.09	2062.97	2391.16	2169.79	1971.89	1928.9	1666.77	1885.39	2417.58	2337.48	2068.8	3216.68
C3	Complement C3 OS=Mus musculus GN=C3 PE=1 SV=3	6.27	188024	1199.41	P01027	60	48.47	0	CO3_MOUSE	1978.79	2129.64	2234.08	2572.78	1705.11	1690.77	2046.83	2338.9	2236.59	2517.99	1575.18	1636.46	2055.26	3195.63
Tubb3	Tubulin beta-3 chain OS=Mus musculus GN=Tubb3 PE=1 SV=1	4.63	50875	18646.5	Q9ERD7	22	65.56	0	TBB3_MOUSE	2672.35	2108.35	1201	1343.53	2502.68	2347.39	2407.2	2349.33	1286.4	1344.2	2503.81	2474.96	2045.1	3179.83
Aldoa	Fructose-bisphosphate aldolase A OS=Mus musculus GN=Aldoa PE=1 SV=2	8.07	39812.2	9653.95	P05064	23	82.14	0	ALDOA_MOUSE	2204.9	1804.8	1506.62	1916.82	2492.34	2347.36	1952.59	1971.43	1597.35	1709.09	2425.92	2456.1	2032.11	3159.64
Anxa6	Annexin A6 OS=Mus musculus GN=Anxa6 PE=1 SV=3	5.18	76341.7	4946.33	P14824	43	72.07	0	ANXA6_MOUSE	2239.56	1816.7	1394.81	1761.82	2339.64	2406.14	1994.45	2032.16	1807.1	1890.84	2094.4	2387.45	2013.76	3131.1
Ckm	Creatine kinase M-type OS=Mus musculus GN=Ckm PE=2 SV=1	6.62	43273.2	14634.5	P07310	17	68.77	0	KCRM_MOUSE	1373.25	1232.96	1659.71	1977.72	2925.2	2624.46	1203.07	1363.35	1753.38	1917.75	2643.22	3278.41	1996.04	3103.55
Cd81	CD81 antigen OS=Mus musculus GN=Cd81 PE=1 SV=2	5.44	26498.9	11203.6	P35762	4	30.93	0	CD81_MOUSE	1808.11	1754.14	1856.7	1931.67	2141.58	2052.24	1762.82	1892.5	2149.96	2309.68	1774.42	2239.64	1972.79	3067.4
Atp1a1	Sodium/potassium-transporting ATPase subunit alpha-1 OS=Mus musculus GN=Atp1a1 PE=1 SV=1	5.14	114294	3843.88	Q8VDN2	41	46.14	0	AT1A1_MOUSE	2147.97	2194.69	1549.51	1620.44	2194.67	2213.2	2037.37	2194.43	1478.12	1645.56	2104.47	2226.54	1967.25	3058.79
Myh9	Myosin-9 OS=Mus musculus GN=Myh9 PE=1 SV=4	5.38	227570	1040.57	Q8VDD5	54	34.23	0	MYH9_MOUSE	1963.57	1629.15	1566.68	1697.49	2344.26	2380.01	1825.42	1697.42	1601.47	1592.98	2127.97	2458.17	1907.05	2965.19
Pkm	Pyruvate kinase PKM OS=Mus musculus GN=Pkm PE=1 SV=4	7.21	58415.3	6713.42	P52480	25	65.73	0	KPYM_MOUSE	2082.95	2072.42	1577.89	1626.33	1883.91	1792.15	2097.45	1983.06	1629.56	1742.63	1819.01	1897.27	1850.39	2877.08
Flna	Filamin-A OS=Mus musculus GN=Flna PE=1 SV=5	5.61	284073	617.89	Q8BTM8	46	28.33	0	FLNA_MOUSE	1729.61	1618.53	1481.31	1751.31	2057.04	1972.58	1449.73	1941.71	1835.51	1930.04	1890.82	2411.68	1839.15	2859.62
Col1a1	Collagen alpha-1(I) chain OS=Mus musculus GN=Col1a1 PE=1 SV=4	5.51	139059	426.834	P11087	5	4.96	0	CO1A1_MOUSE	1997.06	2288.98	1276.29	1465.96	1479.22	1746.07	2052.97	2423.04	1370.66	1518.76	1421.2	1946.54	1748.9	2719.28
Tln1	Talin-1 OS=Mus musculus GN=Tln1 PE=1 SV=2	5.76	271989	395.053	P26039	28	17.63	0	TLN1_MOUSE	1832.24	1481.74	1546.43	1436.14	1697.97	1991.5	1548.59	1819.03	1397.01	1468.22	2068.21	2392.69	1723.31	2679.5
Gdi2	Rab GDP dissociation inhibitor beta OS=Mus musculus GN=Gdi2 PE=1 SV=1	5.85	51050.5	5947.75	Q61598	28	76.4	0	GDIB_MOUSE	2057.59	1616.55	1593.76	2058.05	1853	1474.71	1391.25	1709.57	1834.78	1486.48	1727.8	1831.41	1719.58	2673.7
Cap1	Adenylyl cyclase-associated protein 1 OS=Mus musculus GN=Cap1 PE=1 SV=4	7.3	51907.1	3530.74	P40124	21	55.49	0	CAP1_MOUSE	1682.4	1524.66	1357.69	1561.45	1691.59	1702.19	1219.51	1651.73	1818.31	1689.2	1928.02	2219.25	1670.5	2597.39
Pgam2	Phosphoglycerate mutase 2 OS=Mus musculus GN=Pgam2 PE=2 SV=3	8.77	28998.2	2141.59	O70250	12	47.43	0	PGAM2_MOUSE	859.526	951.64	5478.18	1366.59	565.125	573.625	781.427	834.887	5897.65	1423.51	650.601	648.401	1669.26	2595.46
Ppia	Peptidyl-prolyl cis-trans isomerase A OS=Mus musculus GN=Ppia PE=1 SV=2	8	18142.5	21547	P17742	9	64.63	0	PPIA_MOUSE	1573.71	1804.61	1359.53	1733.49	1654.12	1506.48	1565.75	1856.49	1566.53	1913.61	1458.49	1702.33	1641.26	2551.92
Epb41l3	Band 4.1-like protein 3 OS=Mus musculus GN=Epb41l3 PE=1 SV=1	5.03	103794	910.602	Q9WV92	27	39.94	0	E41L3_MOUSE	1620.31	1700.56	1183.75	1515.34	1586.13	1513.42	1751.43	1714.81	1359.56	1601.14	1578.46	1793.67	1576.55	2451.3
Gsn	Gelsolin OS=Mus musculus GN=Gsn PE=1 SV=3	5.76	86340.9	1466.64	P13020	22	40.51	0	GELS_MOUSE	1969.64	1875.85	1153.97	1739.52	1343.14	1180.94	1789.37	2022.63	1300.68	1671.7	1220.24	1265.63	1544.44	2401.38
Atp1a3	Sodium/potassium-transporting ATPase subunit alpha-3 OS=Mus musculus GN=Atp1a3 PE=1 SV=1	5.09	113117	3406.08	Q6PIC6	38	48.96	0	AT1A3_MOUSE	1605.31	1721.46	1068.01	1326.59	1807.53	1638.27	1632.81	1677.75	1125.18	1248.09	1733.39	1731.64	1526.34	2373.23
Fbn1	Fibrillin-1 OS=Mus musculus GN=Fbn1 PE=1 SV=1	4.6	332854	154.803	Q61554	8	3.07	0	FBN1_MOUSE	1437.04	1662.88	1000.38	1364.53	1727.74	1585.32	1500.93	1674.64	1024.56	1281.59	1649.17	1870.02	1481.57	2303.62
Tubb2b	Tubulin beta-2B chain OS=Mus musculus GN=Tubb2b PE=1 SV=1	4.59	50409.4	27667.3	Q9CWF2	23	67.87	0	TBB2B_MOUSE	1829.99	1672.61	798.943	928.907	1855.93	1801.68	1680.35	1652.59	826.331	914.93	1717.28	1869.71	1462.44	2273.88
Bcas1	Breast carcinoma-amplified sequence 1 homolog OS=Mus musculus GN=Bcas1 PE=2 SV=3	5.82	67833.8	1286.72	Q80YN3	8	15.32	0	BCAS1_MOUSE	1436.79	1281.49	1191	1460.87	1580.97	1489.02	1397.93	1453.82	1442.22	1525.13	1365	1338.21	1413.54	2197.85
Col14a1	Collagen alpha-1(XIV) chain OS=Mus musculus GN=Col14a1 PE=2 SV=2	4.8	194211	589.536	Q80X19	40	32.22	0	COEA1_MOUSE	1385.28	1476.38	1151.88	1146.05	1530.33	1972.7	1111.71	1268.49	1082.92	1272.04	1651.26	1719.23	1397.36	2172.68
Tubb4b	Tubulin beta-4B chain OS=Mus musculus GN=Tubb4b PE=1 SV=1	4.6	50287.4	27147.2	P68372	23	71.24	0	TBB4B_MOUSE	1691.5	1607.93	731.526	868.186	1761.79	1725.77	1436.87	1529.4	792.751	812.367	1570.53	1714.71	1353.61	2104.67
Col6a1	Collagen alpha-1(VI) chain OS=Mus musculus GN=Col6a1 PE=2 SV=1	5.03	109630	1188.82	Q04857	18	26.34	0	CO6A1_MOUSE	1161.98	1054.87	1026.29	1260.23	1874.11	1705.45	1112.61	1045.21	1063.69	1180.76	1652.02	1951.83	1340.75	2084.68
Actn4	Alpha-actinin-4 OS=Mus musculus GN=Actn4 PE=1 SV=1	5.09	105434	1049.72	P57780	26	39.58	0	ACTN4_MOUSE	1522.82	1364.38	1282.3	1603.23	1283.3	1259.33	1405.12	1541.27	574.029	1612.21	1290.06	1345.37	1340.28	2083.95
Ndrg1	Protein NDRG1 OS=Mus musculus GN=Ndrg1 PE=1 SV=1	5.65	43465	9803.06	Q62433	13	60.15	0	NDRG1_MOUSE	2260.18	1923.22	613.631	796.284	1186.79	1059.18	1789.08	2132.54	715.851	752.265	1130.9	1246.89	1300.57	2022.19
Itgb4	Integrin beta-4 OS=Mus musculus GN=Itgb4 PE=2 SV=1	5.49	205472	344.135	A2A863	20	15.13	0	ITB4_MOUSE	1320	1055.95	858.167	1425.72	1302.32	1339.45	1311.46	1113.46	1052.47	1434.1	1435.78	1571.06	1268.33	1972.07
Pllp	Plasmolipin OS=Mus musculus GN=Pllp PE=2 SV=1	9.57	19915.6	4188.55	Q9DCU2	2	21.43	0	PLLP_MOUSE	1098.68	1284.46	1121.13	1493.36	1151.85	1268.26	1099.95	1389.3	1309.94	1413.9	1183.84	1131.74	1245.54	1936.63
Nme2	Nucleoside diphosphate kinase B OS=Mus musculus GN=Nme2 PE=1 SV=1	7.37	17477.2	10358.9	Q01768	11	73.03	0	NDKB_MOUSE	1357.46	1355.56	1087.15	1166.32	1120.45	1086.22	1342.63	1482.7	1110.02	1236.15	1099.51	1142.92	1215.59	1890.07
Eef2	Elongation factor 2 OS=Mus musculus GN=Eef2 PE=1 SV=2	6.39	96283.7	2009.39	P58252	33	48.25	0	EF2_MOUSE	963.837	1416.55	1160.78	1137.47	1326.84	1373.87	1039.45	1395.27	1108.39	960.285	1156.51	1540.67	1214.99	1889.14
Acly	ATP-citrate synthase OS=Mus musculus GN=Acly PE=1 SV=1	7.12	120641	1134.88	Q91V92	36	45.19	0	ACLY_MOUSE	1005.9	1451.61	960.952	1034.4	1203.75	1627.84	1086.67	1478.62	969.675	1005.63	1027.64	1601.53	1204.52	1872.85
Cct2	T-complex protein 1 subunit beta OS=Mus musculus GN=Cct2 PE=1 SV=4	5.95	57819.5	455.806	P80314	9	27.48	0	TCPB_MOUSE	1342.02	622.302	912.953	899.303	875.542	652.209	1545.1	657.894	1616.49	2006.54	1499.5	1206.59	1153.04	1792.8
Msn	Moesin OS=Mus musculus GN=Msn PE=1 SV=3	6.18	67881.2	3169.33	P26041	30	58.41	0	MOES_MOUSE	1098.76	1041.65	1583.12	1012.83	1085.7	986.764	933.24	1138.63	1704.16	1066.29	1064.06	1105.3	1151.71	1790.74
Eno3	Beta-enolase OS=Mus musculus GN=Eno3 PE=1 SV=3	6.81	47367.1	14426.2	P21550	16	53.69	0	ENOB_MOUSE	859.496	654.494	825.812	1005.36	1796.89	1462.17	852.625	720.093	1008.52	1114.5	1713.62	1727.61	1145.1	1780.46
Nid1	Nidogen-1 OS=Mus musculus GN=Nid1 PE=1 SV=2	5.08	139389	613.077	P10493	14	17.35	0	NID1_MOUSE	1026.78	1069.53	959.501	1136.18	1272.25	1205.26	921.104	1048.85	990.01	1070.42	1136.36	1281.58	1093.15	1699.69
Col6a2	Collagen alpha-2(VI) chain OS=Mus musculus GN=Col6a2 PE=2 SV=3	5.97	111475	877.493	Q02788	20	26.79	0	CO6A2_MOUSE	953.489	1002.26	642.396	1055.45	1357.69	1377.18	893.986	987.194	936.149	760.79	1321.77	1524.03	1067.7	1660.12
Vcl	Vinculin OS=Mus musculus GN=Vcl PE=1 SV=4	5.65	117288	759.051	Q64727	33	39.49	0	VINC_MOUSE	932.535	1489.07	988.623	976.885	982.15	1526.61	765.658	1559.95	681.407	533.624	835.001	1447.54	1059.92	1648.02
Hspa12a	Heat shock 70 kDa protein 12A OS=Mus musculus GN=Hspa12a PE=1 SV=1	6.32	75213.7	2301.78	Q8K0U4	23	47.26	0	HS12A_MOUSE	1192.71	1006.1	855.927	970.907	1038.59	1073.28	940.933	1133.68	983.34	943.708	1159.38	1356.5	1054.59	1639.73
Hadha	Trifunctional enzyme subunit alpha, mitochondrial OS=Mus musculus GN=Hadha PE=1 SV=1	9.46	83354.3	1608.06	Q8BMS1	23	45.74	0	ECHA_MOUSE	914.884	811.314	935.949	1112.3	1198.94	1051.29	755.571	974.684	1013.2	1099.97	1164.95	1402.51	1036.3	1611.29
Lama2	Laminin subunit alpha-2 OS=Mus musculus GN=Lama2 PE=1 SV=2	5.67	353054	127.809	Q60675	2	0.74	0	LAMA2_MOUSE	934.258	999.747	739.719	968.282	1268.65	1147.91	1066.38	913.763	885.048	878.611	1263.13	1294.93	1030.04	1601.56
Vdac3	Voltage-dependent anion-selective channel protein 3 OS=Mus musculus GN=Vdac3 PE=1 SV=1	9	31094.9	1307.03	Q60931	6	29.33	0	VDAC3_MOUSE	931.784	875.379	905.588	1199.87	1119.6	924.57	894.061	815.715	965.948	1156.08	1252.04	1288.03	1027.39	1597.44
Tubb2a	Tubulin beta-2A chain OS=Mus musculus GN=Tubb2a PE=1 SV=1	4.59	50306.3	27503.8	Q7TMM9	22	59.1	0	TBB2A_MOUSE	1258.67	1141.29	530.06	616.285	1266.89	1259.32	1130.66	1127.01	548.23	607.011	1210.72	1279.1	997.938	1551.65
Myh10	Myosin-10 OS=Mus musculus GN=Myh10 PE=1 SV=2	5.27	229966	242.463	Q61879	12	7.49	0	MYH10_MOUSE	815.999	741.116	783.062	924.339	890.036	879.076	866.033	926.79	933.548	1118.34	1083.52	1269.93	935.983	1455.32
Lamc1	Laminin subunit gamma-1 OS=Mus musculus GN=Lamc1 PE=1 SV=2	4.9	182944	359.244	P02468	18	15.74	0	LAMC1_MOUSE	1024.8	930.975	778.542	826.388	962.308	954.263	1028.12	936.531	720.197	910.147	989.704	1051.56	926.128	1439.99
Canx	Calnexin OS=Mus musculus GN=Canx PE=1 SV=1	4.29	67677.2	1186.67	P35564	14	26.73	0	CALX_MOUSE	950.178	955.222	546.138	705.137	934.815	888.058	1012.64	960.205	616.655	634.159	874.406	1029.35	842.246	1309.57
Ywhaz	14-3-3 protein zeta/delta OS=Mus musculus GN=Ywhaz PE=1 SV=1	4.53	27942.3	15204.8	P63101	13	53.88	0	1433Z_MOUSE	1299.24	914.879	409.371	537.981	807.798	727.191	1267.81	1062.56	520.468	612.744	803.641	808.743	814.368	1266.22
Fga	Fibrinogen alpha chain OS=Mus musculus GN=Fga PE=2 SV=1	5.69	88170.7	1103.57	E9PV24	12	18.12	0	FIBA_MOUSE	759.849	745.314	740.928	845.52	903.652	813.904	787.769	722.153	746.862	805.897	898.363	954.527	810.395	1260.05
Serpinh1	Serpin H1 OS=Mus musculus GN=Serpinh1 PE=1 SV=3	9.19	46647.7	3031.27	P19324	13	45.56	0	SERPH_MOUSE	669.509	916.082	638.43	751.172	910.454	1170.75	658.814	702.974	728.178	790.862	792.556	928.917	804.892	1251.49
Cat	Catalase OS=Mus musculus GN=Cat PE=1 SV=4	7.79	60080.6	2322.2	P24270	24	59.58	0	CATA_MOUSE	981.562	814.19	762.789	808.919	707.044	658.793	910.491	832.139	863.469	842.372	709.755	747.337	803.238	1248.92
Gstm1	Glutathione S-transferase Mu 1 OS=Mus musculus GN=Gstm1 PE=1 SV=2	8.12	26084.1	6088.45	P10649	14	64.68	0	GSTM1_MOUSE	702.433	550.525	3546.07	653.551	491.352	337.765	625.892	655.348	454.814	796.828	395.246	405.031	801.238	1245.81
Atp1b1	Sodium/potassium-transporting ATPase subunit beta-1 OS=Mus musculus GN=Atp1b1 PE=1 SV=1	8.78	35593.8	2624.87	P14094	12	45.39	0	AT1B1_MOUSE	889.971	814.187	594.288	655.74	886.635	916.084	914.002	844.325	673.125	685.238	818.247	917.961	800.817	1245.15
Rac1	Ras-related C3 botulinum toxin substrate 1 OS=Mus musculus GN=Rac1 PE=1 SV=1	8.57	21849.3	8059.78	P63001	7	40.63	0	RAC1_MOUSE	670.279	745.376	493.081	618.483	1127.58	1161.85	743.5	666.399	503.508	680.846	1042.35	1140.58	799.486	1243.09
Mdh2	Malate dehydrogenase, mitochondrial OS=Mus musculus GN=Mdh2 PE=1 SV=3	8.82	36067.7	6565.76	P08249	15	59.17	0	MDHM_MOUSE	678.939	659.312	660.179	988.368	862.244	799.316	688.4	809.865	741.536	855.307	859.954	958.331	796.813	1238.93
Hsp90ab1	Heat shock protein HSP 90-beta OS=Mus musculus GN=Hsp90ab1 PE=1 SV=3	4.78	83623.5	2426.63	P11499	23	39.5	0	HS90B_MOUSE	1126.17	1003.93	456.412	505.553	716.327	817.093	1120.87	1076.74	460.333	509.893	785.554	874.876	787.813	1224.93
Ptrf	Polymerase I and transcript release factor OS=Mus musculus GN=Ptrf PE=1 SV=1	5.26	43953.7	2305.55	O54724	9	30.36	0	PTRF_MOUSE	873.227	883.133	542.648	619.767	826.906	845.295	920.564	935.47	557.715	591.35	832.214	907.176	777.955	1209.61
Dpysl3	Dihydropyrimidinase-related protein 3 OS=Mus musculus GN=Dpysl3 PE=1 SV=1	6.03	62335.6	4817.25	Q62188	22	65.79	0	DPYL3_MOUSE	675.722	703.483	710.41	799.433	893.187	868.955	667.732	693.001	798.733	801.868	766.579	914.368	774.456	1204.17
Cadm4	Cell adhesion molecule 4 OS=Mus musculus GN=Cadm4 PE=1 SV=1	5.88	43179.6	3343.39	Q8R464	11	44.59	0	CADM4_MOUSE	703.688	761.255	628.989	697.465	890.934	817.167	797.659	710.895	673.966	729.209	844.221	987.333	770.232	1197.6
Mgll	Monoglyceride lipase OS=Mus musculus GN=Mgll PE=1 SV=1	6.72	33729.7	436.452	O35678	6	24.42	0	MGLL_MOUSE	621.982	517.289	1883.72	578.094	453.921	379.202	595.033	564.386	2007.62	561.964	453.481	448.978	755.473	1174.65
Eef1a2	Elongation factor 1-alpha 2 OS=Mus musculus GN=Eef1a2 PE=1 SV=1	9.35	50796.4	8805.61	P62631	15	57.67	0	EF1A2_MOUSE	705.224	558.376	590.906	754.741	912.784	872.406	550.359	693.432	725.773	787.378	872.448	993.52	751.445	1168.39
Got2	Aspartate aminotransferase, mitochondrial OS=Mus musculus GN=Got2 PE=1 SV=1	9.26	47810.7	5083.79	P05202	15	49.07	0	AATM_MOUSE	790.56	772.191	615.097	740.853	735.752	767.734	838.057	835.544	645.08	710.986	658.748	690.413	733.418	1140.36
Serpinf1	Pigment epithelium-derived factor OS=Mus musculus GN=Serpinf1 PE=1 SV=2	6.52	46291.2	1307.49	P97298	12	43.41	0	PEDF_MOUSE	741.75	596.965	663.007	867.559	780.967	659.395	284.869	733.491	896.097	901.587	702.167	837.984	722.153	1122.84
Ogdh	2-oxoglutarate dehydrogenase, mitochondrial OS=Mus musculus GN=Ogdh PE=1 SV=3	6.36	117647	483.912	Q60597	12	18.48	0	ODO1_MOUSE	664.986	613.658	603.517	678.528	711.442	654.953	622.704	653.348	787.358	834.633	801.771	725.851	696.062	1082.28
Tppp3	Tubulin polymerization-promoting protein family member 3 OS=Mus musculus GN=Tppp3 PE=1 SV=1	9.52	19136.6	11539.7	Q9CRB6	10	44.32	0	TPPP3_MOUSE	716.172	787.284	690.056	812.984	536.307	581.754	744.333	768.45	677.388	785.296	561.961	686.097	695.674	1081.67
Igh-3	Ig gamma-2B chain C region OS=Mus musculus GN=Igh-3 PE=1 SV=3	6.07	45000.8	2457.39	P01867	8	30.94	0	IGG2B_MOUSE	387.078	404.349	763.536	942.1	848.446	760.263	381.908	405.533	891.501	948.142	726.075	872.484	694.285	1079.51
Ca2	Carbonic anhydrase 2 OS=Mus musculus GN=Ca2 PE=1 SV=4	6.53	29146.6	4632.76	P00920	11	67.69	0	CAH2_MOUSE	633.321	585.145	945.951	1150.38	412.12	393.935	510.368	594.678	1111.78	1202.69	320.307	396.242	688.077	1069.86
Kif5b	Kinesin-1 heavy chain OS=Mus musculus GN=Kif5b PE=1 SV=3	6.01	110293	374.935	Q61768	11	18.17	0	KINH_MOUSE	616.118	589.989	550.666	629.217	805.374	698.152	607.658	665.474	662.976	680.332	713.7	857.435	673.091	1046.56
Atp1a2	Sodium/potassium-transporting ATPase subunit alpha-2 OS=Mus musculus GN=Atp1a2 PE=1 SV=1	5.23	113529	2461.78	Q6PIE5	28	32.06	0	AT1A2_MOUSE	672.627	750.498	496.778	594.975	812.825	718.101	694.932	745.423	512.397	547.885	760.433	752.015	671.574	1044.2
Aldh2	Aldehyde dehydrogenase, mitochondrial OS=Mus musculus GN=Aldh2 PE=1 SV=1	7.49	57050.9	1568.61	P47738	18	45.86	0	ALDH2_MOUSE	683.485	608.891	691.493	768.434	557.394	514.958	760.955	624.986	792.144	913.699	521.771	611.281	670.791	1042.98
Vat1l	Synaptic vesicle membrane protein VAT-1 homolog-like OS=Mus musculus GN=Vat1l PE=2 SV=2	4.79	46159.6	3146.75	Q80TB8	18	60.67	0	VAT1L_MOUSE	886.761	752.198	446.24	573.464	644.083	576.382	940.857	791.997	544.952	563.853	649.022	647.647	668.121	1038.83
Gpi	Glucose-6-phosphate isomerase OS=Mus musculus GN=Gpi PE=1 SV=4	8.2	62995.1	959.445	P06745	15	31.72	0	G6PI_MOUSE	357.129	434.434	741.829	814.364	803.247	855.439	234.692	445.251	726.388	615.57	694.88	997.085	643.359	1000.33
Slc25a4	ADP/ATP translocase 1 OS=Mus musculus GN=Slc25a4 PE=1 SV=4	10.02	33132.4	5397.46	P48962	15	51.68	0	ADT1_MOUSE	788.945	705.458	484.187	539.838	665.938	632.993	847.27	678.873	512.782	539.155	613.5	686.926	641.322	997.163
Tubb4a	Tubulin beta-4A chain OS=Mus musculus GN=Tubb4a PE=1 SV=3	4.59	50042.1	19175.3	Q9D6F9	22	74.32	0	TBB4A_MOUSE	779.621	701.784	369.821	419.517	802.137	727.975	637.32	757.117	394.91	427.118	744.748	796.692	629.897	979.398
Cryab	Alpha-crystallin B chain OS=Mus musculus GN=Cryab PE=1 SV=2	6.92	20068.8	8262.23	P23927	9	61.14	0	CRYAB_MOUSE	599.756	596.039	513.011	648.367	664.562	663.808	502.196	650.419	578.1	653.265	611.092	794.952	622.964	968.618
Gnb1	Guanine nucleotide-binding protein G(I)/G(S)/G(T) subunit beta-1 OS=Mus musculus GN=Gnb1 PE=1 SV=3	5.54	38175.4	3700.42	P62874	9	53.24	0	GBB1_MOUSE	698.977	589.891	458.153	538.52	691.779	694.402	652.134	629.467	527.039	592.425	653.976	714.955	620.143	964.233
Fgg	Fibrinogen gamma chain OS=Mus musculus GN=Fgg PE=1 SV=1	5.44	50075.8	2161.87	Q8VCM7	14	46.56	0	FIBG_MOUSE	535.314	508.131	516.916	598.138	666.435	683.135	579.527	494.092	568.891	642.605	673.706	792.19	604.923	940.568
	Ig gamma-2A chain C region secreted form OS=Mus musculus PE=1 SV=1	8.2	37109.2	1319.16	P01864	5	17.31	0	GCAB_MOUSE	359.861	351.499	605.642	785.673	707.102	690.446	423.423	388.691	746.567	740.793	693.943	686.375	598.335	930.324
Apoa1	Apolipoprotein A-I OS=Mus musculus GN=Apoa1 PE=1 SV=2	5.39	30615.6	4408.83	Q00623	14	47.35	0	APOA1_MOUSE	765.433	727.353	354.611	458.499	596.97	609.982	742.263	774.656	382.477	460.874	558.18	640.921	589.352	916.356
Dcn	Decorin OS=Mus musculus GN=Dcn PE=2 SV=1	8.85	40151.2	2880.58	P28654	9	29.66	0	PGS2_MOUSE	634.987	550.871	452.776	505.15	688.447	644.624	627.276	524.135	459.32	558.194	676.197	677.401	583.282	906.918
Itga6	Integrin alpha-6 OS=Mus musculus GN=Itga6 PE=1 SV=3	6.63	123299	313.269	Q61739	14	16.59	0	ITA6_MOUSE	620.832	587.102	445.377	523.695	633.285	604.112	682.732	632.467	494.578	496.779	619.626	619.665	580.021	901.848
Map1a	Microtubule-associated protein 1A OS=Mus musculus GN=Map1a PE=1 SV=2	4.73	301509	164.441	Q9QYR6	5	2.02	0	MAP1A_MOUSE	689.456	713.114	278.383	317.295	650.75	682.158	665.929	763.067	418.589	445.41	590.273	690.025	575.371	894.618
Vcp	Transitional endoplasmic reticulum ATPase OS=Mus musculus GN=Vcp PE=1 SV=4	4.95	90006.3	941.461	Q01853	15	30.52	0	TERA_MOUSE	837.371	612.873	387.195	475.206	580.638	583.91	550.625	632.068	475.86	520.867	628.942	539.094	568.721	884.278
Col15a1	Collagen alpha-1(XV) chain OS=Mus musculus GN=Col15a1 PE=1 SV=2	4.6	140929	167.231	O35206	5	4.39	0	COFA1_MOUSE	629.52	596.921	453.801	576.978	653.417	457.6	624.014	569.745	413.696	589.182	599.438	659.702	568.668	884.196
Ywhae	14-3-3 protein epsilon OS=Mus musculus GN=Ywhae PE=1 SV=1	4.44	29345	7423.08	P62259	15	60.78	0	1433E_MOUSE	837.391	741.748	291.274	350.359	530.148	461.076	900.399	827.78	342.371	377.667	515.394	592.101	563.976	876.9
Csrp1	Cysteine and glycine-rich protein 1 OS=Mus musculus GN=Csrp1 PE=1 SV=3	8.55	21438.8	4864.8	P97315	8	60.62	0	CSRP1_MOUSE	630.788	515.844	533.499	642.625	544.393	601.008	526.949	529.218	604.057	569.401	434.218	597.113	560.759	871.899
Cs	Citrate synthase, mitochondrial OS=Mus musculus GN=Cs PE=1 SV=1	8.72	52021.9	1467.8	Q9CZU6	14	41.59	0	CISY_MOUSE	547.594	655.054	475.69	545.509	554.794	612.119	495.922	517.16	533.6	551.901	550.048	641.145	556.711	865.605
Atp6v1b2	V-type proton ATPase subunit B, brain isoform OS=Mus musculus GN=Atp6v1b2 PE=1 SV=1	5.45	56893.1	363.31	P62814	5	14.48	0	VATB2_MOUSE	439.091	300.092	824.209	1018.04	758.471	569.619	597.178	246.209	647.646	258.114	746.578	254.261	554.959	862.881
Vwa5a	von Willebrand factor A domain-containing protein 5A OS=Mus musculus GN=Vwa5a PE=1 SV=2	6.13	87884.3	690.087	Q99KC8	18	34.8	0	VMA5A_MOUSE	501.765	569.738	547.091	568.902	514.54	541.411	510.976	611.655	533.663	556.799	486.815	547.251	540.884	840.996
Col4a2	Collagen alpha-2(IV) chain OS=Mus musculus GN=Col4a2 PE=2 SV=4	8.5	168523	138.266	P08122	4	2.69	0	CO4A2_MOUSE	403.013	419.672	489.069	507.771	649.276	658.998	429.907	494.472	457.681	562.32	639.602	743.121	537.908	836.37
Slc25a3	Phosphate carrier protein, mitochondrial OS=Mus musculus GN=Slc25a3 PE=1 SV=1	9.49	40088.6	2161.6	Q8VEM8	11	37.25	0	MPCP_MOUSE	602.819	524.927	393.555	480.33	539.24	554.813	581.862	543.62	439.85	460.822	577.924	597.357	524.76	815.926
Ehd2	EH domain-containing protein 2 OS=Mus musculus GN=Ehd2 PE=1 SV=1	6.05	61345.7	1904.48	Q8BH64	22	57.46	0	EHD2_MOUSE	548.235	540.009	388.553	494.557	531.624	610.894	519.236	599.177	408.157	377.235	539.122	682.363	519.93	808.416
Lamb1	Laminin subunit beta-1 OS=Mus musculus GN=Lamb1 PE=1 SV=3	4.63	204333	213.793	P02469	9	5.54	0	LAMB1_MOUSE	569.651	510.32	380.954	444.707	597.68	606.408	575.163	562.596	407.331	491.513	513.638	570.415	519.198	807.277
Ahcy	Adenosylhomocysteinase OS=Mus musculus GN=Ahcy PE=1 SV=3	6.07	48201.5	1379.06	P50247	13	43.29	0	SAHH_MOUSE	433.273	613.469	546.854	666.831	443.997	431.766	441.076	751.835	567.829	452.798	336.84	539.221	518.816	806.683
Mtco2	Cytochrome c oxidase subunit 2 OS=Mus musculus GN=Mtco2 PE=1 SV=1	4.41	26147.6	1197.23	P00405	6	30.84	0	COX2_MOUSE	494.229	483.998	419.983	498.86	574.682	506.043	522.117	531.029	486.538	532.501	497.654	621.353	514.082	799.323
Gjc3	Gap junction gamma-3 protein OS=Mus musculus GN=Gjc3 PE=2 SV=2	8.37	30805.9	1597.6	Q921C1	8	42.38	0	CXG3_MOUSE	543.681	567.776	396.704	466.662	600.878	691.386	478.887	459.821	410.295	391.987	547.28	569.998	510.446	793.67
Atp2a1	Sarcoplasmic/endoplasmic reticulum calcium ATPase 1 OS=Mus musculus GN=Atp2a1 PE=1 SV=1	4.95	110794	725.29	Q8R429	19	26.06	0	AT2A1_MOUSE	299.729	235.222	219.581	278.037	1000.12	916.37	208.287	291.36	269.258	305.92	1032.64	1007.76	505.357	785.757
Sept7	Septin-7 OS=Mus musculus GN=Sept7 PE=1 SV=1	8.77	50892.1	1925.34	O55131	14	43.81	0	SEPT7_MOUSE	517.682	453.649	390.652	461.458	545.802	542.245	543.32	511.896	439.884	435.281	545.98	626.135	501.165	779.239
Drp2	Dystrophin-related protein 2 OS=Mus musculus GN=Drp2 PE=2 SV=1	5.8	109305	361.654	Q05AA6	12	17.66	0	DRP2_MOUSE	652.828	514.273	375.515	464.45	509.913	480.469	469.595	573.311	487.531	460.754	457.968	562.88	500.791	778.657
Hadhb	Trifunctional enzyme subunit beta, mitochondrial OS=Mus musculus GN=Hadhb PE=1 SV=1	9.73	51671.6	1487.47	Q99JY0	13	33.89	0	ECHB_MOUSE	409.294	463.568	470.649	598.641	606.567	496.679	445.193	480.274	496.068	542.135	398.696	564.294	497.671	773.807
Fgb	Fibrinogen beta chain OS=Mus musculus GN=Fgb PE=2 SV=1	6.71	55437.2	1649.97	Q8K0E8	21	64.66	0	FIBB_MOUSE	442.676	509.328	485.468	518.295	471.188	563.013	392.325	484.222	486.295	450.086	449.25	668.739	493.407	767.176
Uba1	Ubiquitin-like modifier-activating enzyme 1 OS=Mus musculus GN=Uba1 PE=1 SV=1	5.3	119007	323.257	Q02053	9	13.71	0	UBA1_MOUSE	550.596	609.883			353.471	341.593	540.59	731.903			279.788	521.101	491.116	763.613
Uqcrc1	Cytochrome b-c1 complex subunit 1, mitochondrial OS=Mus musculus GN=Uqcrc1 PE=1 SV=2	5.76	53479.1	1243.2	Q9CZ13	16	50.63	0	QCR1_MOUSE	492.051	487.969	301.124	478.847	546.689	515.538	484.036	510.191	441.665	494.501	479.981	573.472	483.839	752.299
Myh14	Myosin-14 OS=Mus musculus GN=Myh14 PE=1 SV=1	5.32	229498	253.528	Q6URW6	5	2.95	0	MYH14_MOUSE	486.297	451.479	367.735	334.535	671.709	562.788	493.505	436.798	363.315	405.836	571.409	597.335	478.562	744.094
Anxa1	Annexin A1 OS=Mus musculus GN=Anxa1 PE=1 SV=2	7.17	39019.5	3623.44	P10107	16	55.78	0	ANXA1_MOUSE	477.7	427.533	459.585	517.755	478.173	472.513	401.087	456.919	473.797	496.812	506.853	547.751	476.373	740.691
Mapt	Microtubule-associated protein tau OS=Mus musculus GN=Mapt PE=1 SV=3	6.32	76585.7	713.033	P10637	7	17.33	0	TAU_MOUSE	506.865	532.336	424.54	497.747	463.983	505.445	490.847	522.262	436.202	448.636	404.375	475.574	475.734	739.698
Vdac1	Voltage-dependent anion-selective channel protein 1 OS=Mus musculus GN=Vdac1 PE=1 SV=3	8.67	32522.6	2544.64	Q60932	10	49.32	0	VDAC1_MOUSE	495.262	551.826	308.134	425.053	501.207	494.992	518.117	517.784	344.154	385.893	510.33	529.753	465.209	723.332
Uqcrc2	Cytochrome b-c1 complex subunit 2, mitochondrial OS=Mus musculus GN=Uqcrc2 PE=1 SV=1	9.57	48292	1171.18	Q9DB77	15	44.15	0	QCR2_MOUSE	454.403	405.051	391.804	469.507	527.913	482.224	474.729	435.192	449.068	472.152	447.633	566.762	464.703	722.546
Fscn1	Fascin OS=Mus musculus GN=Fscn1 PE=1 SV=4	6.45	55249.4	1267.91	Q61553	16	43.2	0	FSCN1_MOUSE	258.927	380.176	543.133	571.133	464.626	544.508	261.661	352.391	490.269	523.611	437.176	467.869	441.29	686.142
Plg	Plasminogen OS=Mus musculus GN=Plg PE=1 SV=3	6.17	93545.3	381.069	P20918	12	21.31	0	PLMN_MOUSE	405.827	444.396	457.51	564.805	394.476	387.007	371.869	442.957	468.608	511.354	345.462	467.327	438.466	681.752
Ugt8	2-hydroxyacylsphingosine 1-beta-galactosyltransferase OS=Mus musculus GN=Ugt8 PE=2 SV=2	9.66	61477.5	449.639	Q64676	7	14.97	0	CGT_MOUSE	597.148	424.618	284.32	311.016	555.287	499.354	425.718	460.455	350.361	284.339	516.925	537.691	437.269	679.89
Myo1c	Unconventional myosin-Ic OS=Mus musculus GN=Myo1c PE=1 SV=2	9.62	122800	503.204	Q9WTI7	14	20.23	0	MYO1C_MOUSE	363.394	479.48	327.134	401.821	480.231	632.195	404.326	460.375	312.021	378.004	461.111	524.887	435.415	677.007
Hagh	Hydroxyacylglutathione hydrolase, mitochondrial OS=Mus musculus GN=Hagh PE=1 SV=2	7.61	34540.4	343.628	Q99KB8	3	12.94	0	GLO2_MOUSE	179.402	135.012	1122.22	829.08	129.648	118.28	182.925	146.776	1185.49	884.19	118.416	128.914	430.029	668.633
Dusp15	Dual specificity protein phosphatase 15 OS=Mus musculus GN=Dusp15 PE=2 SV=3	9.57	26642.5	3362.66	Q8R4V2	9	52.34	0	DUS15_MOUSE	366.878	388.929	442.306	505.91	479.836	478.835	341.158	379.526	425.012	451.671	424.835	468.663	429.463	667.753
Slc44a2	Choline transporter-like protein 2 OS=Mus musculus GN=Slc44a2 PE=1 SV=2	8.79	81592.8	165.017	Q8BY89	2	3.97	0	CTL2_MOUSE	457.519	401.345	391.152	448.863	428.37	412.566	413.458	438.544	435.65	415.386	422.24	484.182	429.106	667.198
Cfl1	Cofilin-1 OS=Mus musculus GN=Cfl1 PE=1 SV=3	8.22	18787.7	10372	P18760	10	66.27	0	COF1_MOUSE	487.428	479.7	373.836	509.025	362.187	357.809	471.363	460.183	401.254	446.388	365.419	355.739	422.528	656.969
Rpn1	Dolichyl-diphosphooligosaccharide--protein glycosyltransferase subunit 1 OS=Mus musculus GN=Rpn1 PE=1 SV=1	6	68699.5	753.997	Q91YQ5	17	39.47	0	RPN1_MOUSE	418.745	467.877	272.401	343.624	456.413	484.684	387.897	489.701	314.637	323.713	468.992	582.299	417.582	649.279
Ap2a2	AP-2 complex subunit alpha-2 OS=Mus musculus GN=Ap2a2 PE=1 SV=2	6.5	104929	448.198	P17427	14	23.45	0	AP2A2_MOUSE	356.77	600.768	316.812	359.382	452.366	563.146	379.8	477.004	258.917	295.548	393.148	530.398	415.338	645.791
Sdha	Succinate dehydrogenase [ubiquinone] flavoprotein subunit, mitochondrial OS=Mus musculus GN=Sdha PE=1 SV=1	7.03	73669	520.174	Q8K2B3	10	25.45	0	SDHA_MOUSE	359.822	455.032	413.264	445.29	408.626	474.443	377.968	447.186	410.873	380.453	364.789	441.041	414.899	645.108
Hspd1	60 kDa heat shock protein, mitochondrial OS=Mus musculus GN=Hspd1 PE=1 SV=1	5.8	61126.7	610.814	P63038	11	28.1	0	CH60_MOUSE	297.024	451.322	411.93	443.478	492.181	559.676	269.88	470.3	344.121	265.394	345.643	627.201	414.846	645.025
Dpysl5	Dihydropyrimidinase-related protein 5 OS=Mus musculus GN=Dpysl5 PE=1 SV=1	6.65	62086.8	573.095	Q9EQF6	13	46.28	0	DPYL5_MOUSE	310.639	473.636	393.787	412.28	433.214	539.781	281.501	426.457	356.768	380.471	409.692	539.469	413.141	642.375
Hspa5	78 kDa glucose-regulated protein OS=Mus musculus GN=Hspa5 PE=1 SV=3	4.87	72536.2	1670.89	P20029	12	21.37	0	GRP78_MOUSE	413.465	430.607	364.104	380.549	444.618	450.992	420.675	404.616	388.761	386.185	404.218	461.757	412.546	641.449
Prelp	Prolargin OS=Mus musculus GN=Prelp PE=1 SV=2	9.84	43634.7	2302.21	Q9JK53	13	38.1	0	PRELP_MOUSE	374.688	389.769	368.333	454.187	447.97	404.094	370.612	404.842	400.8	417.252	404.409	466.957	408.659	635.406
Dld	Dihydrolipoyl dehydrogenase, mitochondrial OS=Mus musculus GN=Dld PE=1 SV=2	7.81	54785.7	287.678	O08749	7	18.07	0	DLDH_MOUSE	416.215	401.006	334.617	449.381	421.568	404.477	391.637	389.838	348.443	487.996	429.973	427.256	408.534	635.211
Pdia3	Protein disulfide-isomerase A3 OS=Mus musculus GN=Pdia3 PE=1 SV=2	5.81	57134.7	1242.4	P27773	18	47.33	0	PDIA3_MOUSE	354.383	344.377	393.338	448.409	458.261	438.865	344.001	321.738	426.52	461.891	451.285	452.033	407.925	634.264
Nme1	Nucleoside diphosphate kinase A OS=Mus musculus GN=Nme1 PE=1 SV=1	7.26	17321.9	8050.61	P15532	14	80.26	0	NDKA_MOUSE	431.903	436.908	359.357	391.764	373.092	343.828	425.734	507.741	364.789	419.544	359.625	350.088	397.031	617.326
Ldha	L-lactate dehydrogenase A chain OS=Mus musculus GN=Ldha PE=1 SV=3	7.67	36840.8	3749.82	P06151	14	55.12	0	LDHA_MOUSE	335.626	415.959	308.346	368.873	488.348	559.035	318.349	318.199	344.377	357.076	442.495	498.553	396.27	616.142
Cct3	T-complex protein 1 subunit gamma OS=Mus musculus GN=Cct3 PE=1 SV=1	6.26	61200.4	589.952	P80318	5	12.48	0	TCPG_MOUSE	586.482	458.697	467.336	452.023	351.118	405.479	670.988	487.744	135.808	210.128	147.475	372.201	395.457	614.877
Prdx2	Peroxiredoxin-2 OS=Mus musculus GN=Prdx2 PE=1 SV=3	5.04	21949.8	7386.35	Q61171	11	71.21	0	PRDX2_MOUSE	341.973	351.848	349.955	403.662	431.25	411.503	367.903	385.152	393.067	417.428	423.55	455.361	394.388	613.216
Gdi1	Rab GDP dissociation inhibitor alpha OS=Mus musculus GN=Gdi1 PE=1 SV=3	4.76	51092	2215.67	P50396	14	45.41	0	GDIA_MOUSE	448.253	597.71	383.13	443.199	417.747	291.486	467.704	448.942	191.032	409.262	286.005	243.453	385.66	599.646
Jup	Junction plakoglobin OS=Mus musculus GN=Jup PE=1 SV=3	5.69	82542.3	1571.27	Q02257	21	39.19	0	PLAK_MOUSE	122.539	219.186	1573.19	224.665	141.082	112.028	125.736	171.86	1494.01	196.831	125.406	111.726	384.855	598.394
Cyb5r3	NADH-cytochrome b5 reductase 3 OS=Mus musculus GN=Cyb5r3 PE=1 SV=3	8.52	34355.8	2992.83	Q9DCN2	13	61.46	0	NB5R3_MOUSE	412.485	371.103	272.939	317.993	404.616	417.632	384.774	430.951	319.914	352.658	406.245	502.56	382.822	595.233
Mpp6	MAGUK p55 subfamily member 6 OS=Mus musculus GN=Mpp6 PE=1 SV=1	5.96	62916	948.227	Q9JLB0	20	41.59	0	MPP6_MOUSE	352.805	298.064	274.66	458.005	409.548	402.141	341.433	357.375	329.528	506.313	422.703	428.45	381.752	593.569
Acaa2	3-ketoacyl-CoA thiolase, mitochondrial OS=Mus musculus GN=Acaa2 PE=1 SV=3	8.07	42286.2	1756.87	Q8BWT1	13	58.69	0	THIM_MOUSE	262.426	248.764	367.562	454.223	465.555	437.794	258.655	256.014	401.409	462.21	452.58	490.863	379.838	590.593
Ywhag	14-3-3 protein gamma OS=Mus musculus GN=Ywhag PE=1 SV=2	4.61	28473.7	6046.77	P61982	11	51.42	0	1433G_MOUSE	487.855	521.104	201.316	248.61	354.901	357.349	570.248	505.02	228.074	268.285	369.131	393.99	375.49	583.833
Sept2	Septin-2 OS=Mus musculus GN=Sept2 PE=1 SV=2	6.09	41753.7	1541.2	P42208	9	40.72	0	SEPT2_MOUSE	411.2	315.363	333.08	338.364	424.087	405.395	375.366	306.038	362.389	383.026	416.529	404.082	372.91	579.821
Slc25a5	ADP/ATP translocase 2 OS=Mus musculus GN=Slc25a5 PE=1 SV=3	10.03	33159.5	4568.69	P51881	12	43.29	0	ADT2_MOUSE	462.511	384.765	287.544	330.4	370.992	371.085	466.532	388.103	305.222	332.987	357.049	406.198	371.949	578.327
Hsp90aa1	Heat shock protein HSP 90-alpha OS=Mus musculus GN=Hsp90aa1 PE=1 SV=4	4.74	85187.2	1517.7	P07901	15	23.47	0	HS90A_MOUSE	516.613	472.401	209.443	221.883	366.038	393.843	527.22	499.047	238.579	235.761	367.814	408.918	371.463	577.571
Slc25a1	Tricarboxylate transport protein, mitochondrial OS=Mus musculus GN=Slc25a1 PE=2 SV=1	10.22	34273.7	1105.33	Q8JZU2	8	29.58	0	TXTP_MOUSE	357.771	365.144	326.689	358.342	377.546	359.229	433.939	415.346	371.541	374.022	336.376	369.456	370.45	575.996
Cd47	Leukocyte surface antigen CD47 OS=Mus musculus GN=Cd47 PE=1 SV=2	8.7	33610.8	716.823	Q61735	2	8.91	0	CD47_MOUSE	410.61	311.662	300.158	369.871	466.566	374.996	266.552	349.11	358.789	323.285	454.672	377.776	363.671	565.455
Ica	Inhibitor of carbonic anhydrase OS=Mus musculus GN=Ica PE=1 SV=1	6.91	78761.8	417.239	Q9DBD0	4	12.71	0	ICA_MOUSE	264.396	289.882	389.752	519.173	325.055	309.005	195.688	332.085	481.755	542.42	303.418	382.352	361.248	561.689
Ppp2r1a	Serine/threonine-protein phosphatase 2A 65 kDa regulatory subunit A alpha isoform OS=Mus musculus GN=Ppp2r1a PE=1 SV=3	4.81	66121.1	684.585	Q76MZ3	14	31.75	0	2AAA_MOUSE	522.198	450.205	231.313	266.513	330.399	346.952	463.369	474.417	314.622	270.334	318.857	341.58	360.897	561.142
Lum	Lumican OS=Mus musculus GN=Lum PE=1 SV=2	5.98	38664.2	2218.66	P51885	9	32.54	0	LUM_MOUSE	740.388	601.204	158.489	166.137	239.627	225.502	568.537	693.703	176.667	204.031	240.396	279.342	357.835	556.382
Mme	Neprilysin OS=Mus musculus GN=Mme PE=1 SV=3	5.46	86386.4	525.745	Q61391	11	21.73	0	NEP_MOUSE	343.494	363.307	269.908	295.019	426.436	422.324	326.218	360.931	284.66	328.248	398.932	469.213	357.391	555.691
Ca3	Carbonic anhydrase 3 OS=Mus musculus GN=Ca3 PE=1 SV=3	6.99	29651.5	3050.01	P16015	14	76.54	0	CAH3_MOUSE	235.008	193.842	470.086	623.301	283.547	349.424	222.364	202.317	559.41	568.721	259.548	301.915	355.79	553.202
Gnb2	Guanine nucleotide-binding protein G(I)/G(S)/G(T) subunit beta-2 OS=Mus musculus GN=Gnb2 PE=1 SV=3	5.54	38072.5	2944.02	P62880	10	57.06	0	GBB2_MOUSE	389.386	353.879	255.425	309.12	387.033	385.397	397.712	369.778	272.143	315.959	384.855	440.187	355.073	552.087
Hk1	Hexokinase-1 OS=Mus musculus GN=Hk1 PE=1 SV=3	6.35	109615	309.952	P17710	14	17.25	0	HXK1_MOUSE	429.748	403.762	251.979	280.382	353.265	334.349	445.095	445.459	293.405	303.488	340.951	370.695	354.382	551.012
Hsp90b1	Endoplasmin OS=Mus musculus GN=Hsp90b1 PE=1 SV=2	4.55	92761.1	572.673	P08113	15	22.32	0	ENPL_MOUSE	423.286	388.985	231.394	262.047	400.098	373.538	417.077	425.858	233.958	290.351	379.315	415.737	353.47	549.595
Cd151	CD151 antigen OS=Mus musculus GN=Cd151 PE=2 SV=2	7.3	29101.6	401.052	O35566	2	9.88	0	CD151_MOUSE	361.888	296.076	341.221	339.476	334.56	433.416	343.805	286.335	300.916	501.322	287.703	365.183	349.325	543.15
Slc16a1	Monocarboxylate transporter 1 OS=Mus musculus GN=Slc16a1 PE=1 SV=1	7.37	53894.6	567.198	P53986	4	12.78	0	MOT1_MOUSE	387.742	369.35	257.175	301.255	364.919	384.767	393.696	396.438	240.753	300.273	378.195	412.697	348.938	542.548
Slc2a1	Solute carrier family 2, facilitated glucose transporter member 1 OS=Mus musculus GN=Slc2a1 PE=1 SV=4	9.04	54326.9	212.036	P17809	2	3.66	0	GTR1_MOUSE	444.908	361.046	227.104	292.387	369.813	318.596	425.702	401.205	241.088	312.788	386.699	385.461	347.233	539.897
Kpnb1	Importin subunit beta-1 OS=Mus musculus GN=Kpnb1 PE=1 SV=2	4.49	98438.9	192.104	P70168	4	6.74	0	IMB1_MOUSE	415.177	431.351	219.595	213.713	384.335	413.493	372.277	470.188	202.08	230.962	374.757	424.023	345.996	537.973
Atp5o	ATP synthase subunit O, mitochondrial OS=Mus musculus GN=Atp5o PE=1 SV=1	10.41	23420.6	2701.79	Q9DB20	10	62.44	0	ATPO_MOUSE	317.772	292.543	240.171	359.767	292.031	270.805	391.768	324.295	364.364	660.165	325.464	291.976	344.26	535.274
Hdlbp	Vigilin OS=Mus musculus GN=Hdlbp PE=1 SV=1	6.42	142313	150.002	Q8VDJ3	2	2.44	0	VIGLN_MOUSE	373.82	319.956	224.264		386.082	354.356	368.353	333.488		306.164	372.275	402.87	344.163	535.123
Capn2	Calpain-2 catalytic subunit OS=Mus musculus GN=Capn2 PE=2 SV=4	4.67	80727.7	273.099	O08529	7	16.71	0	CAN2_MOUSE	399.508	421.255	190.263	327.371	340.734	331.203	442.016	402.998	261.753	306.245	317.106	357.921	341.531	531.031
Atp2b1	Plasma membrane calcium-transporting ATPase 1 OS=Mus musculus GN=Atp2b1 PE=1 SV=1	5.54	135717	173.614	G5E829	4	4.75	0	AT2B1_MOUSE	367.667	332.409	256.835	294.371	355.468	327.245	359.058	363.354	325.661	308.885	395.99	408.564	341.292	530.66
Stxbp6	Syntaxin-binding protein 6 OS=Mus musculus GN=Stxbp6 PE=2 SV=1	9.57	23956.2	2901.26	Q8R3T5	9	55.71	0	STXB6_MOUSE	303.063	339.778	330.748	424.101	359.128	349.612	331.905	287.987	305.87	390.448	298.425	365.92	340.582	529.556
Ehd1	EH domain-containing protein 1 OS=Mus musculus GN=Ehd1 PE=1 SV=1	6.36	60659.9	607.924	Q9WVK4	11	32.77	0	EHD1_MOUSE	334.359	318.383	255.269	292.22	386.981	352.003	335.446	389.271	266.558	318.919	388.085	437.652	339.595	528.022
Pdcd6ip	Programmed cell death 6-interacting protein OS=Mus musculus GN=Pdcd6ip PE=1 SV=3	6.1	96594.6	305.707	Q9WU78	9	10.36	0	PDC6I_MOUSE	299.326	266.361	321.617	374.585	372.69	360.677	295.444	283.715	365.708	388.113	381.12	354.202	338.63	526.52
Phgdh	D-3-phosphoglycerate dehydrogenase OS=Mus musculus GN=Phgdh PE=1 SV=3	6.1	57384	794.459	Q61753	10	23.64	0	SERA_MOUSE	534.135	425.047	181.197	230.887	317.685	304.744	544.201	423.19	199.547	233.442	307.67	324.372	335.51	521.669
Ckap4	Cytoskeleton-associated protein 4 OS=Mus musculus GN=Ckap4 PE=1 SV=2	5.32	63749.2	466.344	Q8BMK4	12	25.57	0	CKAP4_MOUSE	371.448	350.473	206.31	253.849	414.265	377.194	322.509	344.473	222.359	275.31	452.308	419.509	334.167	519.582
Cav1	Caveolin-1 OS=Mus musculus GN=Cav1 PE=1 SV=1	5.59	20709.8	6027.99	P49817	9	63.48	0	CAV1_MOUSE	425.959	453.988	198.645	297.161	338.637	328.16	412.519	420.175	188.172	225.019	322.461	362.45	331.112	514.831
Wdr1	WD repeat-containing protein 1 OS=Mus musculus GN=Wdr1 PE=1 SV=3	6.11	67091.1	646.336	O88342	12	30.03	0	WDR1_MOUSE	196.768	205.286	279.813	322.632	515.142	469.416	209.551	188.009	284.652	354.1	439.559	507.231	331.013	514.677
Dnm1	Dynamin-1 OS=Mus musculus GN=Dnm1 PE=1 SV=2	7.64	98202.2	316.516	P39053	9	12	0	DYN1_MOUSE	340.149	346.028	238.357	335.723	375.086	377.3	307.057	354.872	266.493	279.205	327.599	408.024	329.658	512.57
Capg	Macrophage-capping protein OS=Mus musculus GN=Capg PE=1 SV=2	6.81	39525.6	1159.49	P24452	8	35.23	0	CAPG_MOUSE	369.944	362.188	348.316	375.926	289.665	275.763	379.237	347.991	287.326	376.329	242.281	271.677	327.22	508.78
P4hb	Protein disulfide-isomerase OS=Mus musculus GN=P4hb PE=1 SV=2	4.58	57457.7	633.106	P09103	13	37.33	0	PDIA1_MOUSE	327.085	496.068	233.549	276.229	351.085	413.848	308.727	484.694	154.383	161.476	260.845	446.164	326.179	507.162
Stk39	STE20/SPS1-related proline-alanine-rich protein kinase OS=Mus musculus GN=Stk39 PE=1 SV=1	5.87	60833.2	575.044	Q9Z1W9	8	20.14	0	STK39_MOUSE	299.448	290.615	232.026	272.32	450.587	410.885	159.88	328.952	283.116	261.179	365.07	549.898	325.331	505.843
Entpd2	Ectonucleoside triphosphate diphosphohydrolase 2 OS=Mus musculus GN=Entpd2 PE=1 SV=2	8.33	54946.8	743.014	O55026	7	18.38	0	ENTP2_MOUSE	418.314	367.593	215.112	262.366	329.376	342.598	401.289	403.305	209.198	231.617	320.644	380.317	323.477	502.96
Idh2	Isocitrate dehydrogenase [NADP], mitochondrial OS=Mus musculus GN=Idh2 PE=1 SV=3	8.85	51362.5	517.514	P54071	10	23.23	0	IDHP_MOUSE	277.171	248.867	277.716	349.992	365.473	330.742	271.839	265.561	315.323	386.413	377.203	387.338	321.136	499.32
Rhoa	Transforming protein RhoA OS=Mus musculus GN=Rhoa PE=1 SV=1	5.73	22124.4	5939.17	Q9QUI0	8	64.77	0	RHOA_MOUSE	254.502	295.977	253.68	313.614	369.53	424.87	263.918	320.41	260.349	287.124	341.016	452.073	319.755	497.173
Prdx5	Peroxiredoxin-5, mitochondrial OS=Mus musculus GN=Prdx5 PE=1 SV=2	9.13	22239.7	5814.19	P99029	10	56.67	0	PRDX5_MOUSE	338.783	300.575	317.606	354.7	262.698	244.377	295.926	357.922	384.578	375.057	283.057	321.103	319.698	497.085
Itgb1	Integrin beta-1 OS=Mus musculus GN=Itgb1 PE=1 SV=1	5.57	91482	269.086	P09055	4	8.15	0	ITB1_MOUSE	331.477	321.227	198.29	262.279	402.803	356.257	300.392	355.304	229.058	308.013	336.89	430.937	319.411	496.637
Pfn1	Profilin-1 OS=Mus musculus GN=Pfn1 PE=1 SV=2	8.48	15128.3	9871.51	P62962	8	71.43	0	PROF1_MOUSE	336.131	335.069	304.598	341.523	289.618	261.032	321.561	345.969	342.226	359.759	274.597	309.836	318.493	495.211
Cadm3	Cell adhesion molecule 3 OS=Mus musculus GN=Cadm3 PE=1 SV=1	5.4	43363.6	1218.22	Q99N28	6	28.79	0	CADM3_MOUSE	392.02	411.217	218.372	296.803	326.565	278.857	367.884	366.992	232.215	291.119	330.802	297.407	317.521	493.699
Ywhaq	14-3-3 protein theta OS=Mus musculus GN=Ywhaq PE=1 SV=1	4.49	28063.5	8375.38	P68254	11	53.47	0	1433T_MOUSE	531.559	531.422	161.954	197.823	260.012	242.541	480.027	499.204	155.383	184.905	288.692	273.397	317.243	493.267
Nsf	Vesicle-fusing ATPase OS=Mus musculus GN=Nsf PE=1 SV=2	6.52	83183.9	328.961	P46460	10	17.61	0	NSF_MOUSE	347.909	411.598	267.76	274.756	300.22	361.651	359.572	325.398	240.858	295.236	286.463	308.803	315.019	489.808
Ogn	Mimecan OS=Mus musculus GN=Ogn PE=2 SV=1	5.4	34354.3	1487.68	Q62000	7	29.87	0	MIME_MOUSE	414.899	653.424	192.284	247.523	221.227	246.445	409.236	494.812	199.222	208.011	204.021	224.091	309.6	481.383
Stxbp1	Syntaxin-binding protein 1 OS=Mus musculus GN=Stxbp1 PE=1 SV=2	6.51	67968	956.693	O08599	17	44.78	0	STXB1_MOUSE	325.824	318.004	191.004	288.926	349.76	370.978	296.117	362.044	226.514	311.705	325.953	347.758	309.549	481.304
Atp5f1	ATP synthase F(0) complex subunit B1, mitochondrial OS=Mus musculus GN=Atp5f1 PE=1 SV=1	9.39	29062.9	1415.57	Q9CQQ7	5	19.14	0	AT5F1_MOUSE	281.006	372.162	328.931	311.379	324.986	448.707	220.081	323.812	268.129	178.782	242.63	387.386	307.333	477.858
Ppib	Peptidyl-prolyl cis-trans isomerase B OS=Mus musculus GN=Ppib PE=1 SV=2	10	23713.5	2491.15	P24369	12	57.87	0	PPIB_MOUSE	278.639	265.471	255.303	319.361	353.531	334.044	302.46	307.897	264.019	311.91	316.242	342.771	304.304	473.148
Ywhab	14-3-3 protein beta/alpha OS=Mus musculus GN=Ywhab PE=1 SV=3	4.57	28200.5	6264.42	Q9CQV8	9	40.65	0	1433B_MOUSE	444.015	416.538	150.273	180.62	273.766	264.957	485.497	429.532	172.866	219.789	306.847	275.345	301.67	469.054
Gnaq	Guanine nucleotide-binding protein G(q) subunit alpha OS=Mus musculus GN=Gnaq PE=1 SV=4	5.34	42443.3	667.257	P21279	10	34.26	0	GNAQ_MOUSE	386.315	320.374	245.259	304.762	355.992	237.817	253.303	324.766	290.143	314.116	255.627	306.434	299.576	465.797
Acat2	Acetyl-CoA acetyltransferase, cytosolic OS=Mus musculus GN=Acat2 PE=1 SV=2	7.24	41754.1	691.741	Q8CAY6	9	48.11	0	THIC_MOUSE	206.179	279.934	349.999	397.121	291.661	352.178	212.214	280.484	347.747	295.35	240.617	339.938	299.452	465.604
Immt	MICOS complex subunit Mic60 OS=Mus musculus GN=Immt PE=1 SV=1	6.16	84299.4	371.017	Q8CAQ8	13	20.21	0	MIC60_MOUSE	306.582	307.911	198.648	272.076	337.46	322.487	304.649	326.973	232.066	299.718	304.862	326.377	294.984	458.658
Apoh	Beta-2-glycoprotein 1 OS=Mus musculus GN=Apoh PE=1 SV=1	8.12	39930.5	1302.22	Q01339	10	35.07	0	APOH_MOUSE	277.958	277.754	255.028	288.378	284.196	330.41	292.336	287.924	266.744	299.433	317.589	341.353	293.259	455.975
Atp2a2	Sarcoplasmic/endoplasmic reticulum calcium ATPase 2 OS=Mus musculus GN=Atp2a2 PE=1 SV=2	5.05	116512	309.832	O55143	9	11.4	0	AT2A2_MOUSE	260.78	253.26	137.305	178.027	466.89	403.315	204.7	249.312	182.662	196.728	422.911	493.755	287.47	446.975
Pdhb	Pyruvate dehydrogenase E1 component subunit beta, mitochondrial OS=Mus musculus GN=Pdhb PE=1 SV=1	6.44	39279.4	1510.71	Q9D051	10	37.05	0	ODPB_MOUSE	317.307	289.699	224.15	273.007	300.175	265.288	337.989	323.738	235.358	278.228	289.675	300.157	286.231	445.047
Hist1h4a	Histone H4 OS=Mus musculus GN=Hist1h4a PE=1 SV=2	11.77	11367.4	9281.19	P62806	5	50.49	0	H4_MOUSE	286.196	329.067	228.909	265.333	306.667	318.098	232.027	284.236	251.249	329.697	301.306	288.787	285.131	443.337
Ndufs1	NADH-ubiquinone oxidoreductase 75 kDa subunit, mitochondrial OS=Mus musculus GN=Ndufs1 PE=1 SV=2	5.37	80803.5	359.659	Q91VD9	9	20.36	0	NDUS1_MOUSE	316.757	296.405	223.21	277.65	281.338	279.046	308.062	297.587	256.495	291.912	271.877	303.011	283.612	440.976
Gnai2	Guanine nucleotide-binding protein G(i) subunit alpha-2 OS=Mus musculus GN=Gnai2 PE=1 SV=5	5.12	41059.3	1861.46	P08752	15	56.34	0	GNAI2_MOUSE	295.984	315.152	215.953	276.519	288.911	270.222	288.737	286.698	240.238	274.138	302.922	347.144	283.552	440.882
Ckmt1	Creatine kinase U-type, mitochondrial OS=Mus musculus GN=Ckmt1 PE=1 SV=1	8.16	47403	658.435	P30275	9	39.71	0	KCRU_MOUSE	281.865	362.06	288.308	251.417	238.664	319.584	270.843	397.473	237.825	234.526	191.588	324.293	283.204	440.341
Vat1	Synaptic vesicle membrane protein VAT-1 homolog OS=Mus musculus GN=Vat1 PE=1 SV=3	5.92	43324.8	1521.04	Q62465	12	40.15	0	VAT1_MOUSE	310.065	320.36	211.927	262.533	291.616	280.187	309.21	324.83	233.575	289.014	251.382	309.336	282.836	439.77
Bsg	Basigin OS=Mus musculus GN=Bsg PE=1 SV=2	5.46	42901	752.005	P18572	6	18.51	0	BASI_MOUSE	317.691	286.916	211.057	226.83	289.092	318.973	319.787	312.512	234.741	249.048	296.997	330.286	282.828	439.756
Fermt2	Fermitin family homolog 2 OS=Mus musculus GN=Fermt2 PE=1 SV=1	6.25	78484.9	569.697	Q8CIB5	10	21.91	0	FERM2_MOUSE	247.615	225.051	219.039	231.222	383.186	354.556	187.641	240.098	286.854	238.6	355.944	411.758	281.797	438.153
Aldh7a1	Alpha-aminoadipic semialdehyde dehydrogenase OS=Mus musculus GN=Aldh7a1 PE=1 SV=4	7.22	59374.8	455.836	Q9DBF1	9	29.87	0	AL7A1_MOUSE	270.15	197.09	300.222	327.167	325.014	353.477	213.284	284.493	317.906	155.278	255.984	377.568	281.469	437.644
Ahsg	Alpha-2-HS-glycoprotein OS=Mus musculus GN=Ahsg PE=1 SV=1	6.04	38124	497.994	P29699	4	20.29	0	FETUA_MOUSE	258.722	628.315	194.91	185.292	247.809	374.909	246.86	624.355	86.6937	97.5893	142.188	284.024	280.972	436.871
Calr	Calreticulin OS=Mus musculus GN=Calr PE=1 SV=1	4.14	48165.7	574.394	P14211	7	31.49	0	CALR_MOUSE	281.616	273.862	225.078	276.332	331.216	307.282	233.778	272.224	275.338	250.731	273.537	357.741	279.895	435.196
[truncated: 312 more rows]

## Sheet: 5 add. ID 1D-gel-LC-MS
gene name	description	accession	entry	IEP	mw
[truncated: 45 more rows]
