# Supplementary material for: Proteome profile of peripheral myelin in healthy mice and in a neuropathy model
Source: eLife. 2020 Mar 4;9:e51406. doi: 10.7554/eLife.51406 (PMC7056269; doi:10.7554/eLife.51406)
Supplement: Figure 3—source data 1. [file elife-51406-fig3-data1.xlsx]

## Sheet: 1 Normalised values
gene name	E21_1	E21_2	E21_3	E21_4	P06_1	P06_2	P06_3	P06_4	P18_1	P18_2	P18_3	P18_4	M06_1	M06_2	M06_3	M06_4
Aacs	542.266	558.161	552.034	640.017	2566.62	2651.1	3284.96	3274.97	2891.88	2770.76	2236.47	2362.15	1777.99	1017.67	1066.56	978.589
Abat	240.186	171.979	255.851	196.977	450.213	455.899	467.4	382.303	862.136	764.529	895.008	798.832	648.589	428.057	585.595	432.615
Abcd3	1952.9	2063.75	2164.02	1826.91	3600.34	3109.81	3112.49	2430.66	3015.93	2899.76	3655.49	3368.17	3581.61	2319.79	2449.65	2426.81
Abce1	2718.72	2992.65	3160.96	2769	2023.92	1757.56	1888.03	1761.27	1502.54	1541.64	1961.89	1673	1559.72	1555.5	1645.12	1610.16
Abhd12	382.45	367.645	320.129	328.504	832.417	996.093	921.633	916.258	1425.01	1422.09	1171.69	1393.8	2196.66	1661.14	1674.13	1626.35
Acaa1a	165.359	143.145	128.556	123.976	297.875	346.315	360.753	346.33	538.06	432.08	324.886	355.652	593.44	385.942	479.203	448.038
Acaa2	1049.43	989.654	574.72	522.334	942.59	1350.14	829.47	649.633	995.488	1363.36	1177.97	1255.31	831.126	1173.01	1041.06	890.678
Acaca	316.861	306.885	408.354	394.583	1648.51	1810.25	1685.27	1542.61	1950.66	1954.85	2309.83	1936.7	1079.69	789.835	833.55	834.384
Acadl	1030.95	1082.34	1000.72	1093.76	832.417	738.289	837.369	959.285	674.513	643.925	861.472	729.031	688.204	1066	983.026	884.509
Acadm	562.589	536.535	543.211	562.611	734.486	705.976	691.225	678.553	950.521	1076	1180.07	1080.25	1309.61	1592.1	1624.02	1390.38
Acads	207.853	226.56	161.325	165.511	202.664	301.357	321.255	316	286.862	211.845	209.604	176.164	247.008	299.64	293.677	298.435
Acadvl	642.035	640.546	587.323	647.569	803.854	873.865	826.836	938.829	944.318	997.349	880.336	904.087	967.058	1126.76	1219.55	1123.57
Acat1	1000.47	1084.4	930.139	1057.88	1052.76	1017.17	1082.26	1069.32	801.663	1012.03	1127.67	1031.5	1089.79	1155.75	1230.1	1036.43
Acat2	780.604	827.973	899.89	907.477	2407.48	2212.06	2583.21	2530.82	2448.4	2564.16	2420.92	2542.75	1519.33	857.495	850.256	760.354
Acly	10146	10313.6	10143.3	10013.1	10293.7	9658.17	9900.97	10022.4	10052.6	10276.6	10335.6	10426.9	7568.69	5273.39	5291.46	4838.96
Aco1	1293.31	1334.64	1227.58	1337.3	996.997	1203.32	1108.59	1256.95	1345.92	1430.48	1136.05	1226.5	1139.5	1304.88	1143.93	1171.38
Aco2	3125.19	3359.26	2978.21	3459.99	3482.01	3662.65	3731.3	3900.62	3789.68	3684.21	2934.45	3316.09	3565.3	4386.9	4062.24	3201.04
Acot7	294.69	351.168	283.579	285.711	172.74	214.954	229.092	203.848	260.502	231.771	197.028	196.107	282.738	232.67	236.524	295.35
Acsl1	475.753	660.113	478.933	621.137	2699.92	2355.36	2541.07	4497.35	3260.92	3498.59	4399.58	3227.46	4015.82	6168.17	7332.25	4278.34
Acss2	333.489	378.973	313.827	353.048	1489.37	1381.75	1586.53	1630.08	2725.96	3199.7	3070.7	3128.85	3015.36	1957.33	1973.09	1666.45
Actb	34221.9	32991.2	30680.7	32526.3	23745.7	24792	24281.1	26381	24757	26688.3	20264.5	23208.2	25003.7	24509	26955.9	28794.7
Actn1	1290.54	1053.5	1430.5	1293.88	497.818	493.832	472.666	517.026	787.707	885.134	628.811	770.025	1162.8	1271.05	1337.37	1590.11
Actn3	11.0855	221.411	8.82246	83.07	46.2454	43.5527	14.4828	4.23214	43.4169	280.013	4.19208	6.6477	26.4096	7730.58	6387.03	230.574
Actn4	4693.79	4098.67	4551.13	4463.76	3314.71	3559.38	3832.68	3848.42	4135.46	4262.07	3387.2	3751.52	4265.15	4161.13	4825.45	5163.62
Actr1a	3688.7	3519.91	3623.51	3530.48	3397.68	3576.24	3679.95	3565.58	3915.28	3802.72	3441.69	3597.51	4470.22	3460.36	3715.8	3630.57
Actr1b	2251.28	2298.55	2167.8	2162.97	1953.19	1940.2	1970.98	1902.35	2277.84	2423.63	2150.54	2172.69	1830.03	1643.19	1770.85	1687.28
Actr2	2227.26	2297.52	2698.41	2393.93	2637.35	2233.83	2354.11	2276.18	1601.77	1641.27	2144.25	1882.41	1723.62	1949.04	1668.86	1764.39
Actr3	3148.28	3276.88	3551.67	3057.23	3331.03	3187.08	3413.99	3431.56	2930.64	2966.88	3699.51	3493.37	3494.61	3907.75	3555.78	3821.05
Adam10	4449.91	4500.3	5023.76	4256.71	4778.24	4233.05	4498.88	4071.32	5762.05	5481.75	7560.41	6941.31	5241.53	3891.87	3785.27	3562.71
Add1	6592.18	5985.3	6442.91	6016.91	5178.13	5045.09	5153.24	5098.32	5951.22	5704.08	5296.69	5868.81	5918.86	5099.4	5429.51	5217.6
Add3	8148.77	7669.05	8646.01	7434.14	6417.23	5833.26	6134.12	5862.92	5566.67	5844.61	6726.19	6515.85	6053.24	5573.03	5221.12	4825.08
Adsl	734.415	859.897	744.867	814.967	609.351	617.466	645.143	628.473	559.768	642.876	601.563	586.106	661.017	666.941	735.072	841.324
Agk	162.587	178.158	168.887	157.33	155.058	134.873	138.245	129.08	117.846	145.774	58.6891	114.119	121.95	108.395	116.064	135.722
Agps	195.844	186.397	234.425	231.589	695.041	622.383	609.594	489.517	564.42	583.098	1138.15	698.008	325.46	297.569	204.87	232.887
Ahcy	984.762	1188.41	1075.08	1083.69	746.727	798.701	921.633	952.231	818.719	795.991	735.709	750.082	1546.52	1349.76	1241.53	1386.53
Ahsa1	1136.26	1140.01	1041.05	1173.68	734.486	851.386	830.786	831.615	947.419	890.378	962.082	816.559	900.257	896.849	938.184	1268.54
Aifm1	514.552	514.908	485.235	494.015	470.615	458.709	425.268	474.705	379.898	331.401	408.727	370.055	326.236	412.178	399.19	359.356
Ak2	1230.49	1246.08	1111.63	1248.57	904.506	857.006	942.699	955.758	579.926	619.804	616.235	537.356	556.932	731.84	674.402	677.069
Ak3	777.833	761.035	722.181	719.94	1071.81	1059.32	1023.01	1036.17	1670	1634.98	1997.52	1772.72	1746.14	1651.47	1485.97	1425.86
Akap12	8612.51	8681.36	10628.5	9010.58	4632.7	4359.49	4068.35	4016.3	5966.73	5760.71	5355.38	5386.85	3247.61	3919.49	3889.9	4611.48
Akr1a1	6602.34	6377.66	6174.46	6156.62	4919.7	5057.74	5211.18	4968.53	4489	4722.46	4755.91	4620.15	5487.76	5630.33	5872.66	5841.46
Akr1b1	1319.18	1375.84	1178.43	1281.29	1298.95	1395.09	1354.8	1329.6	4200.59	5525.8	5315.55	5374.67	17515.8	12027.7	13721	12644.5
Alad	289.147	288.349	236.946	262.426	281.553	299.25	322.571	301.187	299.267	254.843	194.932	240.425	249.338	231.979	249.713	198.185
Alcam	3792.17	3573.46	4062.11	3424.12	2004.87	1955.66	1861.7	1594.11	1054.41	981.618	1322.6	1284.11	1063.38	721.484	611.974	601.497
Aldh1a1	3.69517	0	2.5207	9.43978	25.843	35.8256	60.5644	36.6785	1556.81	1662.25	2028.97	1710.67	2739.61	1657.69	1608.19	919.982
Aldh1a7	0	0	0	0	1.36016	2.80985	1.31662	9.87499	6.20242	4.19495	14.6723	0	1.55351	13.1179	14.9476	0.77115
Aldh2	728.872	663.202	638.998	562.611	956.192	1000.31	1252.1	1149.73	2090.21	1966.38	1395.96	1787.12	3117.89	3416.17	3733.39	3554.23
Aldh3a2	830.489	813.555	821.749	835.735	1379.2	1289.02	1250.79	1214.62	1728.92	1575.2	1532.2	1809.28	1934.89	1755.03	1718.98	1782.13
Aldh6a1	1346.89	1281.09	1429.24	1174.94	2128.65	1903.68	1902.51	1799.36	3172.54	2997.29	4468.75	3802.48	4225.54	3656.44	3520.61	2959.67
Aldh7a1	1710.86	1581.8	1475.87	1703.57	1346.56	1240.55	1256.05	1208.98	1181.56	1164.1	1035.44	1185.51	974.826	909.276	847.619	828.215
Aldh9a1	1198.16	1206.95	1144.4	1188.78	1585.95	1673.97	1698.44	1502.41	2184.8	2060.77	2079.27	2163.83	2476.29	2242.47	2233.35	2159.99
Aldoa	4817.58	5934.83	3975.15	5643.73	3913.18	4166.31	4132.86	4218.74	6404	7138.75	5353.28	5679.35	9832.14	18488.6	17047.3	8342.3
Aldoc	671.597	504.61	490.276	525.481	689.601	707.381	801.821	782.946	1009.44	1020.42	842.607	1058.09	2126.75	1231.01	1516.74	1143.62
Anp32a	2476.69	2583.81	2601.36	2412.18	1241.83	1159.07	1212.61	1194.17	1086.97	1127.39	1303.74	1187.72	1231.93	1412.59	1481.57	1620.96
Anp32b	4855.45	5467.3	4830.92	4921.9	2641.43	2415.07	2543.71	2633.1	1904.14	2061.82	2037.35	2200.39	1802.07	1782.65	1717.22	1856.16
Anpep	653.121	916.537	797.802	860.278	361.802	406.024	331.788	416.866	866.788	1006.79	857.28	832.07	771.316	1714.3	1238.89	1833.79
Anxa1	2252.2	2329.45	2229.56	2141.57	2089.2	1872.77	1961.76	2065.28	2676.34	2948	3439.6	3026.92	2957.1	6288.99	4686.52	4719.44
Anxa11	739.034	752.796	768.814	721.199	968.433	1034.03	1003.26	1137.03	1671.55	1520.67	1297.45	1444.77	1921.69	2231.42	2066.29	2294.94
Anxa2	12562.6	12137.4	11785.5	11974.7	6672.94	6261.76	6580.46	6372.89	7632.08	8182.25	6816.32	8187.75	7519.75	6755.02	6780.07	7285.05
Anxa3	708.548	601.413	612.53	623.025	503.259	498.047	510.848	604.49	728.784	851.574	844.703	822.099	918.899	1340.79	1395.41	1708.87
Anxa5	5188.94	5336.51	4857.39	5017.56	4246.42	4429.03	4422.52	4163.01	6036.5	5965.22	5585.94	5830.03	6005.86	5546.79	5512.16	5924.74
Anxa6	6327.05	6177.87	5890.88	6599.66	3351.43	3453.31	3309.98	3543.71	4817.73	5061.2	4758.01	4654.5	5249.3	5379.02	5450.61	6033.48
Anxa7	927.487	888.732	781.417	872.235	735.846	802.213	767.588	787.178	993.937	1061.32	880.336	1104.63	1662.25	1813.03	1857.02	1816.83
Aoc3	880.374	907.269	1358.66	1049.7	1591.39	1320.63	1306.09	1919.27	4315.33	5046.52	4472.95	4366.43	4801.11	13757.2	12354.7	13387.9
Ap1b1	877.602	983.475	811.666	914.4	814.735	864.733	863.702	861.945	939.666	883.037	624.619	850.906	910.355	1016.98	980.389	1199.91
Ap2a2	2817.57	2705.33	2553.47	2711.73	1985.83	2083.51	2048.66	1960.19	2180.15	2342.88	2253.24	2156.07	1852.56	2074.7	1951.98	2365.12
Ap2b1	3318.26	3343.82	3620.99	3368.11	2712.16	2863.24	2668.79	2563.97	2854.66	2964.78	2993.14	2783.17	2884.09	2774.09	2739.81	2869.45
Ap2m1	5218.5	5031.69	4699.85	4877.85	4673.51	4902.49	4747.73	4810.53	5175.92	5187.05	4487.62	4810.72	5427.95	4624.4	4648.71	4830.48
Ap2s1	635.569	609.652	472.632	594.077	511.42	528.955	546.397	555.115	437.27	470.883	412.92	386.675	452.847	469.482	422.93	509.73
Apex1	949.658	1062.77	926.358	983.625	957.552	925.145	882.134	952.936	623.343	658.607	607.851	703.548	525.862	456.364	521.408	418.734
Apoa1	4.61896	28.8349	11.3432	10.6984	10.8813	8.42956	7.89971	9.87499	6.20242	4.19495	0	6.6477	5.43727	2.76166	5.27563	8.48265
Apoe	278.985	256.424	187.792	211.451	825.617	1178.73	1727.4	1548.26	6069.07	5232.15	4433.12	3798.05	16724.3	14901.2	14121.1	16923.7
Apoh	0.923792	5.14908	3.78105	1.25864	2.72032	4.91725	1.31662	1.41071	7.75302	2.09747	0	1.10795	26.4096	14.4987	13.1891	6.94035
Apool	238.338	258.484	276.017	259.279	273.392	226.896	235.675	213.018	196.927	196.114	333.27	217.158	238.463	322.424	276.092	264.504
Appl1	562.589	544.773	667.986	575.197	711.363	629.407	696.491	574.865	590.78	613.511	962.082	673.634	527.416	526.787	453.705	471.944
Arcn1	6376.94	6417.82	6909.24	6187.46	5193.09	5019.81	4891.24	4926.91	4087.39	4250.53	5214.94	4677.76	3924.16	4264.69	3984.86	4113.31
Arf4	9740.46	10984	10058.9	9467.47	5510.01	5519.96	5279.64	5135.7	3902.87	4011.42	4831.37	4600.21	3805.32	4718.3	4002.45	4316.9
Arf5	1747.81	1749.66	1300.68	1495.89	1059.56	1202.62	1333.73	1286.57	1234.28	1277.36	928.545	1123.46	1164.35	1194.42	1013.8	1186.03
Arf6	1189.84	1222.39	1093.98	1197.59	663.758	743.207	654.359	709.589	522.554	564.221	469.513	588.321	570.137	706.985	532.839	616.149
Arhgap1	1619.41	1584.89	1540.15	1668.32	1214.62	1204.73	1059.88	1184.29	1183.11	1288.9	1238.76	1110.17	1056.38	1224.11	1289.01	1338.72
Arhgdia	8118.28	8079.94	6521.05	7393.86	6107.11	7056.25	7317.76	7439.39	7867.77	7335.92	5510.48	6032.79	8214.17	7000.12	7231.14	8173.42
Arl1	1090.07	1151.34	1175.91	1146.62	1103.09	1057.21	1034.86	997.374	1015.65	1045.59	1251.33	1051.44	895.597	975.556	968.958	868.315
Arl3	687.301	509.759	505.401	542.473	595.75	631.515	750.472	602.374	745.841	741.457	582.699	663.662	845.108	691.105	687.591	788.886
Arl6ip5	1178.76	1274.91	1111.63	1264.3	1210.54	1145.72	1121.76	1195.58	1488.58	1466.13	1452.55	1490.19	1816.05	1802.67	1857.9	1771.33
Arl8a	2187.54	2144.08	1797.26	2003.12	2000.79	2268.96	1980.19	2178.85	2147.59	2336.59	1672.64	1992.09	2362.88	1875.86	1805.15	1953.32
Arl8b	2335.35	2676.49	2820.66	2331.62	3705.07	3289.64	3471.92	3160.7	3349.31	3347.57	4751.72	4018.53	4380.11	3750.33	3575.12	3799.45
Arpc1b	4128.43	4274.77	3313.46	3592.15	2483.65	2663.74	3614.12	3064.07	3067.1	2639.67	2098.13	2281.27	3970.76	3795.9	3714.05	4175
Arpc2	3898.4	3999.81	3897	3823.11	4091.36	3998.42	3906.41	4170.07	4135.46	4105.81	5355.38	4452.85	4390.99	4053.43	3911.88	4149.56
Arpc3	1404.16	1439.68	1334.71	1325.34	1309.83	1369.8	1321.88	1376.86	1242.03	1242.75	1310.02	1233.15	1108.43	1173.01	1118.43	1273.94
Arpc4	1535.34	1675.51	1344.79	1369.4	1137.09	1263.03	1507.53	1403.66	1401.75	1395.87	1402.25	1383.83	1777.99	1884.83	1617.86	2019.64
Arpc5	4024.96	4346.86	4263.77	3734.38	3490.17	3205.34	3320.51	3349.03	2840.71	2794.88	4007.63	3298.37	3743.95	3759.31	3413.34	3908.96
Art3	1195.39	1173.99	1144.4	1078.02	3543.21	3789.79	3440.32	3711.59	4040.88	4233.75	4326.22	4311.03	4134.66	3306.4	3296.39	3149.38
Asah1	1939.96	2121.42	2175.37	1847.68	4515.73	4236.56	4165.78	3957.05	4310.68	4277.8	5554.5	5177.45	5513.4	5116.66	4968.77	4504.29
Asl	210.625	201.844	186.532	212.71	262.511	299.952	318.622	279.321	322.526	362.863	306.022	332.385	303.711	344.517	353.467	334.679
Aspa	316.861	319.243	269.715	285.081	831.057	734.075	701.758	521.964	1479.28	1266.87	2179.88	1686.3	3789	2409.55	2568.35	3056.84
Aspn	3818.96	3903.01	4563.73	3492.72	3597.62	2396.81	3123.02	2015.91	1508.74	1639.18	2098.13	1832.55	815.591	2831.39	1507.07	1796.01
Atl3	193.073	209.053	293.662	233.477	310.116	250.077	196.176	209.491	305.469	273.72	215.892	306.902	245.454	256.834	193.44	185.076
Atp12a	0	0	0	0.629318	0	0	0	0	0	0	0	0	3.10701	3.45207	0.879272	0.77115
Atp1a1	2357.52	2332.54	2463.99	2540.56	4011.11	4115.73	3791.86	3798.34	6889.34	6819.94	5896.16	6807.24	7237.79	5444.61	5955.31	5583.12
Atp1a2	2822.18	2483.92	2527	2398.33	3219.5	3368.31	3423.21	4040.99	6695.51	6965.71	6273.44	7284.77	6499.1	6186.81	6827.55	5917.8
Atp1a3	11.0855	9.26835	8.82246	10.6984	8.16096	7.7271	0	10.5803	6.20242	6.29242	4.19208	1.10795	33.4004	24.1645	17.5854	21.5922
Atp1a4	0	2.05963	6.30175	1.25864	5.44064	2.80985	5.26647	0	27.9109	31.4621	0	9.97155	9.32104	2.76166	0	16.1941
Atp1b1	161.664	200.814	156.283	222.149	127.855	143.303	119.812	130.491	141.105	175.139	138.339	176.164	249.338	318.972	254.11	295.35
Atp1b3	2344.58	2630.15	2465.25	2424.76	4276.34	4272.38	3912.99	4082.6	7258.38	6650.04	7650.54	7729.06	9035.97	7403.32	7631.2	7976.77
Atp2a2	4988.48	5464.21	5139.71	6143.41	4737.43	4773.24	4559.45	4567.89	3634.62	3771.26	3724.66	3685.04	3419.27	3510.76	3607.65	4188.89
Atp2b1	758.433	745.587	858.299	874.123	807.935	783.247	730.723	655.276	817.169	841.087	783.918	773.349	732.478	831.26	731.555	805.851
Atp2b2	4.61896	3.08945	0	10.0691	4.08048	3.51232	1.31662	2.11607	9.30363	7.34116	14.6723	7.75565	31.0701	7.59456	12.3098	11.5672
Atp4a	2.77138	2.05963	1.26035	1.88796	0	0	0	2.11607	4.65181	3.14621	0	0	0	0	2.63782	0
Atp5c1	2075.76	2186.3	2083.36	2134.65	2015.76	1875.58	2098.69	2129.47	1696.36	1735.66	1664.25	1710.67	1669.24	2079.53	2032.88	1714.27
Atp5f1a	6536.75	6903.89	6019.44	7084.24	5911.25	6012.39	5378.39	6128.14	5199.18	5117.84	4359.76	4662.25	4313.31	5453.59	5540.29	4230.53
Atp5f1b	14981.1	15447.3	14409.6	15541	12291.8	11643.3	11307.1	12204.1	10632.5	10573.4	9648.06	10531.1	9683.78	13158.6	12383.7	11647.4
Atp5f1d	933.954	968.028	664.205	850.839	787.532	977.829	1167.84	1071.44	1170.71	917.645	519.817	709.088	935.211	1066.69	1000.61	1088.86
Atp5h	1545.5	1586.95	1342.27	1416.6	1445.85	1435.84	1392.98	1333.83	1339.72	1308.82	1249.24	1347.27	1353.88	1425.71	1406.84	1301.7
Atp5i	456.353	569.489	366.762	466.325	447.492	466.436	366.02	423.919	491.542	477.175	551.258	413.265	475.373	519.882	478.324	517.441
Atp5mf	1333.03	1309.93	1042.31	1147.25	909.947	957.458	904.517	911.32	958.274	1035.1	729.421	905.195	1055.61	1136.42	1062.16	1192.2
Atp5mg	1537.19	1627.11	1335.97	1607.28	1379.2	1335.38	1431.16	1378.27	1190.86	1283.65	1555.26	1208.77	1604	2033.96	1853.51	2019.64
Atp5po	1504.86	1664.18	1299.42	1484.56	1305.75	1205.43	1229.72	1292.92	1200.17	1275.26	1106.71	1151.16	1181.44	1379.45	1407.71	1307.87
Atp6v0c	1762.6	1859.85	1424.2	1553.79	2047.04	2811.26	2713.55	2695.17	3479.56	2825.3	2255.34	2302.32	3392.86	2863.15	2587.7	3103.11
Atp6v1a	1391.23	1597.25	1715.34	1492.74	1872.94	1711.2	1839.32	1684.39	1535.1	1328.75	1947.22	1782.69	1911.59	1768.84	1698.75	1742.8
Atp6v1b2	1088.23	1018.49	966.689	1003.13	1267.67	1228.61	1145.46	1153.96	1096.28	1072.86	1240.85	1066.96	977.156	1040.46	1041.06	1097.35
Atp6v1c1	716.863	753.826	744.867	728.121	982.035	880.187	872.918	845.722	921.059	914.499	886.624	1147.84	1260.67	1092.24	1096.45	1128.96
Atp6v1d	577.37	601.413	552.034	609.18	946.671	999.606	855.802	832.321	846.63	857.867	1029.15	918.491	1190.76	1247.58	1050.73	1202.22
Atp6v1e1	701.158	787.81	718.4	765.881	1082.69	1086.01	1049.34	1010.78	1220.33	1203.95	1502.86	1205.45	1379.51	1224.11	1226.58	1174.46
Atp6v1g1	2678.07	2646.63	2424.91	2399.59	2237.46	2372.22	2797.81	2362.94	2409.64	2311.42	2142.15	2279.05	3249.94	3168.31	2861.15	3046.81
Atp6v1h	472.982	566.399	511.702	499.05	837.858	678.58	651.726	713.821	544.262	566.318	656.06	725.707	870.741	844.377	808.931	741.846
Auh	192.149	163.741	136.118	161.735	372.684	401.107	416.051	402.053	615.59	588.341	442.264	572.81	651.696	559.926	596.147	566.024
Avil	68.3606	73.117	69.3193	88.1046	42.1649	40.7429	55.298	43.0267	26.3603	57.6805	46.1128	34.3464	72.2381	44.1866	46.6014	40.0998
Bag3	206.929	221.411	184.011	253.615	201.304	232.515	289.656	273.678	331.829	309.377	255.717	264.8	615.189	898.23	651.541	753.413
Bag5	169.054	87.5344	178.97	161.735	78.8892	135.575	78.9971	149.536	122.498	248.551	2.09604	235.993	215.937	92.5156	172.337	187.389
Basp1	245.729	221.411	210.479	216.486	55.7665	83.5932	110.596	91.6963	55.8218	41.9495	20.9604	27.6987	45.8285	37.9728	31.6538	44.7267
Bax	443.42	493.282	369.283	381.996	439.331	514.906	492.415	434.5	353.538	427.885	442.264	386.675	369.735	309.996	330.606	393.286
Bcam	497.924	431.493	574.72	609.18	718.164	760.768	903.2	830.91	1837.47	1838.44	941.121	1551.13	2483.28	2263.18	2787.29	3079.97
Bcap31	1226.8	1216.21	1279.26	1188.15	1482.57	1383.85	1260	1366.98	1959.96	1800.68	2211.32	1933.37	2293.75	2247.99	2194.66	2303.42
Bcas1	666.054	586.996	520.525	505.972	6161.52	6289.16	6656.82	6419.45	6421.05	6044.92	6449.51	6965.68	3340.04	2441.31	2423.27	2257.16
Bdh1	38.7993	24.7156	41.5916	34.6125	107.453	82.1882	93.4799	97.3392	212.433	177.237	125.762	214.942	160.011	79.3977	73.8589	72.4881
Bgn	7157.54	5981.18	8077.59	7529.17	6240.41	6294.07	6298.7	6104.15	8159.28	9625.31	6833.08	9094.05	6294.81	9036.15	6898.77	5416.56
Bin1	1091.92	1651.83	911.234	1713.63	1598.19	1841.16	1649.72	1599.04	905.553	979.52	827.935	777.781	476.927	1096.38	820.361	547.516
Blvrb	315.937	338.81	263.413	249.21	213.545	243.052	297.556	249.696	333.38	255.892	236.852	231.562	391.484	537.143	459.859	655.477
Bphl	74.8272	112.25	88.2246	73.6303	205.384	186.855	196.176	208.785	119.397	234.917	171.875	173.948	252.445	278.928	304.228	249.853
Brox	1357.97	1470.58	1469.57	1346.11	1915.1	1769.51	1913.05	1723.89	1623.48	1616.1	2175.69	1865.79	1745.36	1697.04	1621.38	1657.2
Bsg	3767.22	3434.44	3071.47	3388.25	3405.84	3966.81	4110.48	3834.32	6631.94	6720.31	5152.06	6010.63	7080.11	7066.4	6914.6	6604.13
Bzw1	3105.79	3212	3566.79	3158.55	2498.61	2260.53	2400.2	2317.8	2042.15	2170.89	3290.78	2468.51	2046.75	2124.41	2078.6	2051.26
C1qbp	1055.89	1273.88	1121.71	1171.79	775.291	871.055	772.855	906.383	564.42	568.415	639.292	610.48	624.51	774.645	797.5	746.473
C3	19.3996	21.6262	17.6449	22.6555	16.3219	20.3714	32.9155	42.3214	34.1133	78.6553	4.19208	52.0736	128.164	109.776	123.977	90.9957
Cab39	1942.73	2179.09	2261.07	2040.25	2029.36	1884.01	2023.64	1997.57	2054.55	1991.55	2102.33	2192.63	2586.59	2667.07	2439.98	2738.35
Cab39l	837.879	865.046	879.725	779.726	1637.63	1462.53	1414.05	1515.81	1380.04	1254.29	2221.8	1382.72	1806.73	1331.12	1303.96	1346.43
Cacybp	1365.36	1689.93	1478.39	1403.38	1070.45	941.301	1000.63	925.428	769.1	788.65	838.415	880.82	1115.42	1248.96	1043.7	1523.02
Cadm3	731.643	754.856	592.365	763.993	2785.61	3086.63	3321.83	2899.72	8788.83	8713.96	8390.44	8409.34	15722.3	11401.5	12527	12414
Cadm4	6939.53	6820.48	5839.2	5784.07	8411.22	8937.44	10626.4	9053.95	15123	14733.7	11163.5	11075.1	10977.1	6394.62	7739.35	6148.38
Calm1	7384.79	7722.6	7704.52	7195.63	5141.4	4858.94	5112.43	4804.89	5161.96	5417.78	5900.35	5432.28	6625.71	6748.11	6431	7251.12
Calr	19391.3	19997	18675.9	18914.2	12021.1	12739.9	10809.4	11382.3	13011.1	12208.3	11232.7	12071.1	8950.53	9324.05	10481.8	15999.8
Calu	17765.4	18453.3	20165.6	17166.5	14744.1	13504.9	13390	12884	9340.84	9400.88	12261.8	10672.9	6139.46	6554.8	6556.73	6652.71
Camk2b	26.79	164.771	30.2484	219.003	807.935	951.136	945.332	1000.2	1598.67	1625.54	1448.36	1608.74	1244.36	879.589	894.22	712.542
Camk2d	2070.22	2130.69	2166.54	2065.42	1602.27	1407.74	1369.28	1374.74	1327.32	1263.73	2012.2	1595.45	1746.14	1699.8	1460.47	1667.23
Camk2g	680.835	639.516	703.276	733.785	807.935	741.099	685.958	765.312	860.585	866.257	681.212	777.781	847.438	895.468	1046.33	934.633
Cand1	2866.53	2869.07	3193.73	2815.57	1852.54	1631.82	1574.68	1609.62	1380.04	1362.31	1704.08	1472.47	1280.09	1371.16	1205.48	1278.57
Canx	15122.5	17141.3	17650	14860.1	17389.6	15518.8	15645.4	14157.9	18066.1	16204	24203	20877.1	19362.1	15040	15451.5	16299.8
Cap1	4322.42	4039.97	4117.57	3920.65	4836.73	5066.87	4880.7	4747.05	5008.45	5439.8	5221.23	5139.78	5243.09	4549.14	4564.3	5385.71
Capg	1018.94	1052.47	562.116	985.513	798.413	345.612	1639.19	885.222	437.27	360.766	186.547	270.34	4457.01	2212.78	2202.58	3426.99
Capn1	737.186	686.888	642.779	692.88	794.333	857.006	772.855	789.294	1049.76	1090.69	804.879	893.008	949.969	956.225	976.872	964.708
Capn2	3020.8	3081.21	3249.18	3172.39	2906.66	2861.13	2812.3	2877.15	4679.72	4600.81	5495.81	5263.87	5883.91	5104.93	5443.57	5667.18
Capn5	4609.72	4436.45	3889.44	4067.29	3439.84	3924.66	3882.71	3960.58	2750.77	2705.74	1957.7	2472.94	2647.95	1917.28	2137.51	1908.6
Capns1	837.879	850.629	758.731	797.976	665.118	661.721	670.159	682.785	874.541	866.257	628.811	752.298	924.337	816.761	948.735	850.578
Capza1	3860.53	4000.84	4072.19	3863.39	2355.8	2232.43	2252.73	2183.78	1851.42	1811.17	2177.78	2130.59	1899.94	2106.46	1810.42	2159.99
Capza2	2904.4	3445.77	3438.24	3213.93	2875.38	2409.45	2681.95	2575.96	2270.08	2167.74	2940.74	2841.89	3042.54	3712.36	3247.15	3194.87
Capzb	2560.75	2501.43	2393.41	2515.39	2079.68	2129.17	2080.26	2146.4	2418.94	2580.94	2211.32	2612.55	2612.22	2910.79	2963.15	3032.16
Car2	839.727	772.363	313.827	384.514	102.012	93.4277	57.9312	99.4552	43.4169	14.6823	0	39.8862	25.6329	48.329	61.5491	55.5228
Car3	10.1617	2418.01	15.1242	2923.18	2663.19	1234.23	1819.57	6437.79	6453.62	6798.96	7843.38	3693.91	13983.1	58976.6	52620.1	60093.4
Cast	2901.63	2734.16	3247.92	2858.99	2833.21	2257.72	2498.94	2551.98	2836.06	2812.71	4217.23	3503.34	3592.48	3980.24	3631.39	4016.92
Cat	2300.24	2254.27	2080.84	1922.57	2461.89	2249.29	2375.18	2508.95	2542.99	2692.11	2812.88	2688.99	3150.51	3646.08	3845.06	3424.68
Cav1	10660.6	9560.82	12369.1	10575.7	10907.1	9825.36	10166.9	11079	18283.2	18225	20205.8	21299.2	21192.2	21083.2	20856.3	21304.6
Cav2	1299.78	1307.87	1935.9	1344.22	1991.27	1458.31	1984.14	1900.94	5744.99	4931.16	6820.51	6395.09	11380.2	12160.3	10852	11191.7
Cavin1	11071.6	10588.6	10355	10614.1	7223.81	8125.4	9373.01	8589.12	12967.7	12618.4	12274.4	13002.9	16212.4	19805.9	18930.7	18410.4
Cavin2	2253.13	2309.88	2907.63	2426.02	1785.89	1451.99	1695.8	1722.48	2978.71	2933.32	3173.4	3378.14	2536.88	4274.36	3869.68	3777.86
Cavin3	671.597	662.172	491.537	607.922	824.256	1067.74	1262.64	1157.49	2394.13	1982.11	1398.06	1659.71	2904.28	2022.23	1851.75	2075.16
Cct2	2950.59	3291.29	3173.56	3085.55	2693.12	2571.72	2610.85	2586.54	2226.67	2186.62	2494.29	2347.75	2012.57	2071.94	2019.69	1988.8
Cct3	2998.63	3390.16	3143.31	3150.37	2408.84	2410.86	2232.98	2395.39	1873.13	1924.43	2299.35	2024.22	2003.25	1917.28	1939.67	2156.13
Cct4	3423.57	3515.79	3554.19	3424.12	2206.18	2099.66	2077.62	2230.34	1701.01	1777.61	2362.24	1890.16	2265.01	2582.84	2221.92	2941.17
Cct5	4403.72	4704.2	4743.96	4479.49	3227.66	3099.27	3070.35	3128.96	2560.05	2569.41	3483.62	2738.85	2485.61	2819.65	2753.88	3011.34
Cct6a	2968.14	3436.5	3443.28	3102.54	2210.26	1888.92	2136.87	2072.34	1375.39	1345.53	1599.28	1600.99	1418.35	1491.3	1419.15	1799.86
Cct7	2476.69	2870.1	2709.75	2751.38	2183.06	2029.42	2038.13	2175.32	1643.64	1790.19	1565.74	1689.62	1644.39	1694.97	1689.96	1669.54
Cct8	3455.91	3836.07	3544.11	3506.56	2482.29	2280.9	2508.16	2427.13	1541.3	1720.98	2062.5	1935.59	2294.53	2102.31	2071.57	2362.8
Cd151	936.725	1012.31	819.228	974.814	1345.2	1346.62	1736.62	1283.04	2876.37	2996.24	2898.82	3319.42	4916.85	4305.43	4478.13	4340.8
Cd36	2754.75	3361.32	2932.84	2999.33	3513.29	2249.99	2498.94	4072.02	3358.61	2982.61	4502.29	3310.55	8249.9	14239.8	15317.8	14482.2
Cd47	501.619	429.434	466.33	465.696	897.705	854.196	882.134	847.133	921.059	926.035	1085.75	996.047	944.532	890.635	828.275	745.702
Cd59	1308.09	1082.34	1174.65	1006.91	3511.93	3226.42	2889.98	3008.34	3634.62	3404.2	4254.96	4275.58	5643.11	5472.23	5586.9	5026.35
Cd81	5798.64	5726.81	5004.85	5476.96	6207.77	6601.05	6542.28	6311.53	10308.4	10003.9	8832.71	9599.28	14781.6	10608.2	11229.2	10419
Cd82	301.156	307.915	243.248	375.703	628.394	726.347	678.058	665.856	1514.94	1612.96	1219.89	1575.5	2252.58	1798.53	1947.59	2013.47
Cd9	4429.58	4251.08	4131.43	3899.89	24787.5	22653.7	23402.9	21495.7	44629.5	45115.6	45557.4	50031.7	34821.9	22986.7	23495.9	22607
Cdc42	4131.2	4214.01	4503.23	4307.06	6198.25	5253.02	5467.92	5422.78	4982.09	5007.72	6024.01	6196.76	5150.65	4799.07	4577.49	4851.3
Cdh1	114.55	113.28	123.514	87.4753	3454.8	3607.15	3475.87	3241.82	5210.03	5171.32	6237.81	4736.49	7727.14	5020.7	5408.4	6386.66
Cdipt	786.147	841.36	691.933	797.346	1013.32	1097.25	1028.28	971.276	1469.97	1530.11	1481.9	1335.08	1503.02	1192.35	1264.39	1254.66
Cers2	2119.18	2081.26	2145.12	1939.56	4711.59	4657.33	4702.96	4651.12	7466.16	7145.05	8000.58	7532.95	7407.12	5136	5461.16	5083.42
Ces1d	1.84758	10.2982	8.82246	5.03455	9.52111	4.21478	0	26.0982	266.704	324.06	492.569	253.721	2202.1	8787.6	7414.02	8709.36
Cfb	57.2751	21.6262	83.1831	74.2596	97.9315	92.0227	63.1977	122.732	415.562	405.861	471.609	389.998	942.202	1857.91	1905.38	1357.99
Cfh	287.299	346.018	376.845	310.883	703.202	678.58	530.597	530.428	559.768	638.681	1022.87	782.213	1329.03	3508.69	2384.59	3178.68
Cfl1	14825	14561.6	13589.1	14087.3	13092.9	14439.1	13885.1	13749.5	11910.2	11685	10928.7	10598.6	9197.54	7915.61	8018.08	8471.85
Cfl2	3066.99	3676.45	3196.25	3614.81	4178.41	4188.09	4202.65	3820.21	3549.33	3498.59	5938.08	4182.51	3748.61	3279.47	3255.95	2427.58
Chchd3	822.175	915.507	804.104	864.684	1059.56	1074.07	1088.84	1048.86	1322.67	1267.92	1431.59	1391.59	1329.03	1340.1	1246.81	1159.04
Cisd1	348.27	360.436	282.319	304.59	361.802	348.422	347.587	360.437	322.526	362.863	291.349	356.76	346.432	448.079	487.996	438.784
Ckap4	6535.83	6460.04	5967.76	6008.1	2510.85	2606.14	2928.16	2697.28	1631.24	1518.57	1412.73	1362.78	633.831	809.857	742.985	694.035
Ckap5	3525.19	3546.69	3900.79	3428.53	2187.14	2078.59	2005.21	2048.35	1674.65	1685.32	2330.79	1865.79	1910.04	1610.74	1615.22	1438.19
Ckb	1931.65	1867.06	1122.97	1472.61	1955.91	2912.41	4523.9	3986.67	2893.43	2184.52	1597.18	1697.38	2318.61	1629.38	1522.9	1893.17
Ckm	6.46654	1251.23	6.30175	1999.34	118.334	67.4365	31.5988	11.9911	54.2712	576.805	0	1.10795	27.1864	11516.8	8362.76	342.39
Ckmt1	0.923792	2.05963	5.0414	4.40523	0	5.61971	2.63324	0.705356	17.0566	5.24369	23.0564	5.53975	61.3635	55.2332	46.6014	50.8959
Cldn19	113.626	94.7432	92.0056	67.3371	6765.43	7486.86	8722.6	7359.69	7672.39	6187.55	5129.01	5543.07	6821.45	3820.76	4246.89	3656.79
Clip2	1224.95	1114.26	816.707	1099.42	1745.08	1993.59	2285.65	1936.2	2640.68	2274.71	1806.78	1988.77	3017.69	1838.57	1961.66	2385.17
Cltc	8166.32	8843.04	9388.35	8356.72	7932.45	7358.31	7071.56	6758.72	7883.27	7327.53	9985.53	9041.98	8677.89	8501.77	7959.17	8435.61
Cmtm5	1794.93	1644.62	1580.48	1482.67	3668.35	3787.68	3525.9	3249.58	3754.01	3649.6	3330.6	3802.48	3328.39	1993.23	2113.77	1959.49
Cmtm6	1910.4	2027.71	2104.79	1826.28	6732.79	6044	5936.63	5783.22	10164.2	10369.9	13305.7	12289.4	9651.94	7116.11	8154.37	7882.69
Cndp2	812.937	977.296	843.175	823.149	1044.6	1061.42	1049.34	1081.31	1226.53	1337.14	1167.49	1147.84	1193.09	1316.62	1326.82	1656.43
Cnn2	423.097	382.062	410.874	402.134	214.905	236.028	322.571	262.393	234.141	266.379	186.547	208.295	208.17	331.399	305.987	286.097
Cnn3	13092	13098.2	12585.9	12716	6603.57	6930.51	6660.77	6955.52	7757.67	8101.49	7313.08	8362.81	11099.8	7464.77	8334.62	7885.01
Cnp	12651.3	12051.9	10236.6	10329.6	28465.4	29998.7	32486.2	31778.4	26172.7	23881.8	21205.6	22962.3	15436.4	8812.46	10062.4	10086.6
Cnrip1	458.201	450.03	422.217	439.264	231.227	270.449	272.54	264.509	238.793	248.551	146.723	251.505	212.83	276.856	246.196	289.952
Cntf	106.236	102.982	128.556	100.691	463.814	515.608	517.431	427.446	6635.04	6293.47	7883.2	7742.35	16407.4	10458.4	11653	11256.5
Cntn1	50.8086	40.1629	37.8105	42.1643	35.3641	45.6601	38.1819	31.0357	15.506	8.3899	0	11.0795	51.2657	109.776	64.1869	63.2343
Col14a1	26549.8	23184.3	24954.9	25709.5	17240	17950.8	16469.6	14440.1	10344.1	9173.3	9620.82	9164.96	4728.87	6052.18	4427.14	3757.04
Col15a1	5097.48	5214.99	4635.57	5050.28	11234.9	11730.4	13471.6	12187.1	27130.9	27949.9	22578.5	25530.5	10452	7027.73	6653.45	4925.33
Col18a1	8590.34	7499.13	6992.43	7428.48	4714.31	5593.02	6705.54	6391.23	4571.18	4051.27	3051.83	3483.39	2718.64	2685.71	3154.83	2965.84
Col1a1	223345	204054	173299	208408	158173	215783	224670	205841	329521	344073	231258	287575	137815	178020	115714	55385.5
Col1a2	69264.1	64374.9	58744.9	67257.8	55266	67128.1	77082.7	66757.7	111347	111709	94803.8	97773.3	53196.7	72847.1	48497.1	24734.6
Col28a1	133.026	59.7294	109.651	119.571	4068.24	3055.01	3649.67	3240.41	6791.65	6543.07	4575.65	7842.07	2183.45	1199.25	1445.52	1157.5
Col4a2	10464.7	8936.75	9204.34	9902.33	9435.42	9833.79	13412.4	12360	13012.7	10655.2	9750.77	8849.2	7815.69	7339.8	7682.2	7370.65
Col6a1	13509.5	12257.9	10952.4	12823	9425.9	11259.8	12201.1	11692	19278.7	18704.2	12555.3	15234.3	6587.65	7443.36	6369.45	5087.27
Col6a2	14800.1	13310.4	11244.8	13949.5	9938.68	12607.1	13467.7	13314.3	20618.4	20820.6	12779.5	16849.7	10364.2	11616.9	8566.75	6901.79
Comt	1277.6	1194.59	1279.26	1112.01	1191.5	1279.89	1404.83	1341.59	1866.93	1545.84	1058.5	1444.77	1532.53	1437.44	1771.73	2072.08
Copa	5651.76	5553.8	5810.22	5581.43	4631.34	4591.3	4338.26	4237.78	3991.26	4191.8	3814.79	4240.12	3082.16	3269.8	3391.35	3293.58
Copb1	3408.79	3654.82	3724.34	3376.92	2508.13	2381.35	2339.63	2316.39	1784.75	1806.97	1968.18	2128.37	1791.97	1960.78	1818.34	1887
Cope	1098.39	1041.14	831.831	947.754	946.671	1034.03	1145.46	1022.06	979.982	941.766	756.67	750.082	773.646	780.169	757.933	809.707
Copg1	3225.88	3081.21	3268.09	3246.02	2905.3	2802.13	2624.02	2565.38	2432.9	2558.92	2286.78	2567.12	2058.4	2076.77	2133.99	1917.85
Copg2	784.299	814.585	860.82	824.407	1101.73	1065.64	1069.09	1034.76	1093.18	1027.76	1274.39	1173.32	1340.68	1081.19	1134.26	1027.94
Cops4	1351.51	1398.49	1353.62	1417.23	1332.96	1333.28	1281.07	1288.69	1252.89	1244.85	1106.71	1280.79	1283.97	1211.68	1281.1	1304.01
Coro1a	104.388	154.473	103.349	117.053	103.372	142.6	180.377	193.973	86.8338	98.5813	60.7851	89.7439	197.295	419.082	279.609	360.127
Coro1c	3058.68	3117.26	3038.71	2986.12	1602.27	1666.24	1816.93	1890.36	1372.28	1480.82	1167.49	1312.92	1062.6	1495.44	1481.57	1712.72
Cox4i1	2699.32	2741.37	2239.64	2550.63	2071.52	2262.64	2314.62	2379.87	2377.08	2421.53	2066.69	2081.84	2532.99	3144.15	3044.04	3019.82
Cox6a1	2111.79	2051.4	1714.08	1794.82	1542.42	1666.95	1523.33	1685.8	1556.81	1650.71	1278.58	1448.09	1709.63	1561.72	1686.44	1644.86
Cox6b1	1778.3	1809.39	1387.65	1608.54	1460.81	1463.93	1544.39	1552.49	1545.95	1532.2	1209.41	1357.24	1408.25	1583.12	1634.57	1655.66
Cox6c	1413.4	1384.07	1249.01	1322.83	1303.03	1409.14	1402.2	1361.34	1195.52	1228.07	1377.1	1152.27	1514.67	1779.89	1618.74	1616.33
Cp	346.422	292.468	449.945	342.349	716.804	670.15	626.71	718.053	1331.97	1447.26	1846.61	1791.56	3597.15	4921.97	4284.69	2734.5
Cpne3	279.909	268.782	339.034	313.401	504.619	458.709	446.334	373.134	465.181	456.201	505.145	488.606	415.563	428.057	402.707	339.306
Cpne6	1.84758	2.05963	1.26035	4.40523	5.44064	1.40493	2.63324	2.11607	0	2.09747	0	2.2159	7.76753	3.45207	0	0
Cpt1a	1313.63	1251.23	1304.46	1101.94	1818.53	1905.08	2114.49	2137.94	1776.99	1512.28	1349.85	1656.39	1066.48	1208.23	1439.37	1311.73
Crip2	2008.32	1917.52	1603.17	1877.26	2385.72	2600.52	2892.61	2762.88	5036.36	4897.6	3403.97	4132.65	4939.38	3486.6	4087.74	4228.21
Crmp1	145.035	166.83	131.076	157.33	32.6438	49.8749	40.8152	51.491	27.9109	30.4134	37.7287	15.5113	53.596	18.6412	24.6196	23.1345
Cryab	1598.16	1575.62	1314.55	1748.25	9420.46	9803.58	9042.53	9165.4	15833.2	16707.4	15936.2	16290.2	20518.7	13369.9	15162.2	13123.4
Cs	1829.11	1972.1	2024.12	2030.18	1670.28	1601.62	1660.26	1814.88	1460.67	1611.91	1345.66	1437.01	1492.92	1795.08	1764.7	1692.67
Csnk2a1	901.621	947.432	995.677	961.599	1194.22	1092.33	1107.28	1069.32	989.286	961.692	1037.54	1038.15	867.634	805.714	725.4	702.517
Csrp1	10627.3	9723.53	9741.25	9288.11	6736.87	7129.3	7280.9	6895.56	10479	10980.3	9474.09	10491.2	14951.7	12111.9	14776.2	14496.8
Cst3	2572.76	2407.71	2121.17	2298.9	3623.46	4334.9	4011.74	4277.28	14847	16264.9	11222.2	15396.1	49141.3	42852.7	39921.6	38595.3
Ctnna1	8187.57	7743.19	7777.62	7707.89	5943.9	6198.54	6344.78	6494.22	6154.35	5977.8	6118.34	6156.88	7139.92	5773.25	5940.36	6330.37
Ctnnb1	6339.98	5927.63	6542.48	6325.28	4989.06	4906.01	4743.78	5001.68	4507.61	4762.31	3900.73	4480.55	3260.81	3175.91	3421.25	3265.82
Ctnnd1	4999.56	4866.91	5280.87	5086.15	4011.11	4105.2	3990.67	4063.56	4496.75	4460.28	4479.23	4624.58	4546.34	4202.56	4554.63	4297.62
Ctsd	3506.71	3329.4	3009.72	3175.54	4692.55	4917.25	4947.85	4697.67	6982.37	6827.28	5642.53	6226.68	8707.41	7847.26	8074.36	8282.92
Cttn	3756.14	3548.75	3355.05	3546.84	2850.89	2868.16	3042.7	2853.87	2815.9	2925.98	2320.31	2769.87	2516.68	2214.85	2186.75	2330.41
Cyb5a	654.969	722.931	625.134	679.664	1089.49	1072.66	1087.53	1086.25	2763.18	2853.61	3185.98	3106.69	4154.08	3194.55	3350.03	3013.65
Cyb5b	1034.65	990.684	1228.84	1173.68	1120.77	1054.4	1190.22	1083.43	1094.73	1129.49	1154.92	1277.47	1188.43	1066	1173.83	1171.38
Cyb5r3	1576.91	1590.04	1448.14	1499.04	1882.46	1989.38	2175.05	2082.92	3378.77	3651.7	2819.17	3272.88	4071.74	4338.57	4646.95	4574.46
Cyc1	1304.39	1434.53	1194.81	1380.1	1206.46	1238.44	1292.92	1235.08	1141.24	1216.53	1045.92	1041.47	977.933	1158.52	1219.55	1031.03
Cycs	1936.27	2585.87	2170.32	1963.47	1681.16	1560.17	1516.74	1525.69	1324.22	1301.48	1978.66	1496.84	1481.27	2172.74	1919.45	1690.36
Cyfip1	2889.62	2848.47	2951.74	2813.05	2793.77	2486.02	2649.04	2515.3	2775.58	2667.99	2903.01	2834.14	2690.67	2508.28	2503.29	2638.87
Cyp51	3224.03	3326.31	3894.48	3398.32	8728.14	8093.08	9798.27	9640.11	11652.8	11781.5	14601	12614	9806.51	5965.18	6620.04	5644.04
Dad1	1774.6	1765.11	1637.2	1653.85	1618.59	1586.87	1489.1	1490.42	1625.03	1563.67	1043.83	1641.98	1236.59	1052.88	1179.1	1201.45
Dag1	20046.3	20446	19928.7	18513.9	40542.3	40416.2	38648	35303.8	49127.8	46903.7	47116.8	47241.9	39190.3	23871.8	25840.9	21764.9
Dars	1488.23	1677.57	1657.36	1522.32	1565.54	1443.56	1561.51	1409.3	1274.6	1099.08	1750.19	1398.23	1507.68	1280.72	1428.82	1453.62
Dcn	11146.5	11553.5	11775.5	10890.4	14254.5	13927.7	13900.9	12533.5	35792.6	40359.6	42398.7	47096.7	72303.3	92577.7	72631.4	49075.2
Dctn1	2393.55	2243.97	2077.06	2231.56	2240.18	2691.14	3042.7	2763.59	3006.62	2730.91	2037.35	2358.83	2654.94	2137.52	2165.65	2274.12
Dctn2	2579.23	2484.95	2306.44	2340.44	1946.39	2032.23	2143.45	2083.62	2346.06	2418.39	2358.04	2069.65	2786.21	2470.99	2686.18	2606.49
Dctn4	545.961	572.578	674.288	614.844	518.221	513.501	493.732	495.866	596.983	534.856	628.811	608.265	689.757	622.754	595.267	576.049
Ddah1	1936.27	2190.42	2012.78	1981.09	7767.87	8102.92	7417.83	7696.85	8072.45	8483.23	12182.2	9019.82	15528.9	9090	9546.26	8304.51
Ddah2	2669.76	2436.55	1891.79	2102.55	1757.33	2280.2	2859.7	2302.99	2851.56	2214.93	2100.23	1732.83	2386.96	2161.69	1967.81	2348.15
Ddost	2843.43	2870.1	2515.66	2711.1	1959.99	2193.79	1944.65	2039.19	1913.45	2030.35	2102.33	1858.03	1819.16	1902.78	2080.36	1705.01
Ddx1	1712.71	1835.13	1826.25	1782.86	1218.7	1141.5	1109.91	1229.44	1006.34	1001.54	1379.19	1131.22	1001.24	1121.23	1077.11	1061.87
Ddx3x	8032.37	8926.45	11268.8	8943.87	9744.18	7964.53	7378.33	7435.16	6061.31	7108.34	10306.2	9550.53	7170.99	8264.27	7287.41	6809.25
Decr1	479.448	493.282	467.59	461.29	614.792	555.649	583.262	575.571	725.683	617.706	626.715	701.332	637.715	828.498	801.017	727.965
Des	223.558	1808.36	268.455	1913.76	306.036	223.383	255.424	217.955	565.971	777.114	511.433	569.486	1158.92	3548.04	2975.46	1197.6
Dhcr7	838.803	846.509	931.399	830.071	1878.38	1802.52	2072.36	2178.14	2021.99	1978.97	2045.73	1863.57	1224.94	749.791	794.862	771.15
Dhrs1	591.227	562.28	528.087	587.783	897.705	847.874	796.554	806.928	865.237	970.082	840.511	816.559	666.454	632.42	640.11	622.318
Dlat	558.894	701.305	665.465	638.129	628.394	592.177	678.058	606.606	522.554	462.493	731.517	528.492	455.178	615.16	590.871	579.133
Dld	1991.7	2205.87	2339.21	2123.95	2328.59	2124.95	2290.92	2130.18	2051.45	1962.19	2840.13	2354.39	2359.78	2594.58	2435.58	2357.4
Dlg1	1236.03	1252.26	1366.22	1273.74	1251.35	1148.53	1167.84	1058.74	1105.58	1045.59	1100.42	1103.52	1050.95	1052.19	913.564	1004.04
Dlst	2221.72	2426.25	2286.28	2414.69	1768.21	1744.22	1789.28	1826.87	1510.29	1732.51	1764.86	1627.58	1505.35	1641.12	1600.28	1781.36
Dmd	6998.65	7846.17	7360.45	6317.73	13102.4	11431.9	10995.1	9107.56	9170.27	9614.82	15699.3	12499.9	7720.93	4758.34	5615.91	5047.95
Dnaja1	3601.87	4229.46	3919.69	3733.12	2758.4	2624.4	2685.9	2564.68	1913.45	1966.38	3035.06	2348.85	2406.38	2280.44	1791.08	3605.12
Dnaja2	2007.4	2192.48	2258.55	2023.89	1950.47	1900.87	1884.08	1863.55	1446.71	1444.11	1794.21	1579.94	1788.86	1862.05	1682.93	1645.63
Dnajb11	1487.31	1570.47	1499.82	1398.35	1207.82	1345.92	1227.09	1291.51	1198.62	1137.88	1242.95	1082.47	926.667	856.114	831.792	1044.91
Dnajb4	658.664	618.92	723.441	680.293	948.031	797.999	829.47	808.338	798.561	840.038	1395.96	1058.09	1285.53	1543.08	1412.11	1400.41
Dnm1	945.039	912.418	812.926	991.177	880.023	1003.12	838.686	844.312	2175.5	2132.08	1551.07	1855.82	1654.48	1429.16	1631.93	1515.31
Dnm1l	683.606	610.681	742.347	696.656	655.597	564.781	521.381	543.124	510.149	468.785	739.901	500.793	537.513	468.101	451.067	464.232
Dnm2	1112.25	1110.14	1102.81	1167.39	1258.15	1440.05	1379.82	1470.67	1454.47	1454.6	1255.53	1192.15	1304.95	1126.07	1323.3	1341.03
Dnm3	214.32	196.695	220.561	202.641	78.8892	84.2956	94.7965	109.33	105.441	126.897	146.723	122.982	245.454	200.911	205.75	181.22
Dnpep	893.307	901.09	810.406	877.899	752.168	819.073	847.902	838.669	978.431	953.302	609.947	820.991	1237.37	1185.44	1121.07	1025.63
Dpysl2	1467.91	1544.73	1569.14	1728.11	2037.52	1980.95	1961.76	1867.78	2321.25	2172.98	2223.9	2218.12	2436.68	1866.19	1772.61	1883.15
Dpysl3	739.034	609.652	1008.28	925.098	557.665	535.98	495.048	429.562	344.234	426.836	272.485	413.265	157.681	185.031	158.269	142.663
Dpysl4	84.0651	73.117	54.1951	73.0009	35.3641	28.801	43.4484	25.3928	32.5627	26.2184	41.9208	26.5908	53.596	51.7811	30.7745	47.8113
Dpysl5	858.203	890.792	857.039	950.271	937.15	1071.96	1086.21	1150.44	505.497	441.518	425.496	421.021	408.572	225.766	216.301	316.171
Drp2	79.4461	63.8486	73.1003	56.0093	8963.45	8638.9	8271	7830.87	28621.1	28378.8	33069.2	33596.4	35363.3	27879	29772.2	25229.7
Dsp	71.132	39.133	109.651	78.6648	12.2414	16.1567	22.3825	5.64285	54.2712	38.8033	52.401	50.9657	44.2749	33.1399	56.2734	20.821
Dstn	5321.04	5791.69	6095.06	5071.68	6137.04	5458.84	6097.26	5630.15	5509.3	5903.34	8092.8	6860.43	8133.39	8841.45	8486.74	9833.7
Dusp15	155.197	146.234	131.076	129.64	10096.5	10388	11918	11395	9922.32	11334.7	12808.9	11892.7	13985.4	8298.79	9100.47	8949.19
Dusp3	2393.55	2254.27	2176.63	2239.74	2316.35	2232.43	2242.2	2097.02	2491.82	2760.28	2397.87	2538.31	2813.4	2943.24	2938.53	2358.95
Dync1h1	4989.4	4500.3	4558.69	4597.17	5601.14	5586.69	5643.03	5820.6	6844.37	6899.64	5133.2	6048.3	6482.78	5178.8	5446.21	5264.64
Dync1i2	3258.21	3218.18	3542.85	3106.32	2657.75	2301.97	2419.94	2410.91	2403.44	2286.25	3106.33	2732.2	3124.88	2705.05	2596.49	2675.89
Dync1li1	536.723	509.759	510.442	483.946	549.504	515.608	584.579	545.24	395.404	458.298	494.665	491.93	453.624	443.937	439.636	424.132
Dync1li2	4457.3	4482.79	4532.22	4349.85	4314.43	3820	4024.9	3746.15	3871.86	3775.45	4567.27	4268.93	4032.13	3678.53	3612.05	3383.8
Dynll1	4443.44	4661.98	4009.18	4372.5	4402.84	5543.84	5573.25	5731.73	4245.56	4268.36	4104.04	3948.73	4880.34	3882.2	3801.09	5297.03
Dynll2	1625.87	1636.38	1614.51	1619.24	1509.78	1366.29	1657.62	1417.06	1721.17	1748.24	2330.79	2030.87	2577.27	2752.68	2532.3	2496.98
Ech1	501.619	550.952	458.768	487.722	814.735	846.469	804.454	901.445	1353.68	1268.97	918.065	1145.62	1546.52	1551.36	1896.59	1785.98
Echs1	490.534	368.674	417.176	362.487	368.603	356.852	466.083	446.491	493.092	666.997	477.897	620.452	693.641	691.796	781.673	750.329
Eci1	501.619	426.344	383.147	454.368	720.884	805.023	678.058	933.892	770.65	750.896	639.292	630.424	708.399	678.678	727.158	715.627
Eef1a1	48139.7	42311.1	44777.7	45918.2	40727.2	37845.9	38187.2	36441.5	30759.3	35215.5	29449.3	35461	36754.4	40829.8	41408.5	33855
Eef1a2	12.9331	144.174	8.82246	124.605	28.5633	20.3714	26.3324	16.9286	34.1133	96.4838	2.09604	14.4033	52.8192	1083.26	771.122	50.8959
Eef1d	2034.19	1992.7	1837.59	2003.75	1400.96	1499.76	1436.43	1414.94	1369.18	1373.85	1219.89	1343.94	1286.3	1471.96	1514.11	1406.58
Eef1g	9580.65	10044.8	9418.6	10247.2	7376.14	7877.43	7209.8	7479.6	6822.66	6852.45	5753.62	6545.77	6447.05	7183.77	6564.65	6165.34
Eef2	22856.5	21506.7	19708.1	21559.2	20562.9	22445.8	24245.5	23646.4	25983.5	24460.7	18111.9	21379	22421	24631.9	24039.3	21419.5
Ehd1	2186.62	2132.75	2044.29	2161.71	1113.97	1183.65	1220.51	1232.96	1384.69	1533.25	1421.11	1405.99	1227.27	1846.17	1702.27	2362.8
Ehd2	1957.52	1854.7	1685.09	2003.12	1294.87	1394.39	1851.17	1826.87	2403.44	2354.41	2049.93	1717.32	2898.07	3191.1	3071.3	3344.48
Ehd3	343.651	340.869	420.957	357.453	588.949	549.327	614.861	696.892	533.408	558.977	492.569	563.947	428.768	357.635	419.413	414.107
Ehd4	2281.77	2277.95	2165.28	2250.44	2834.57	2857.62	2889.98	2895.49	3189.59	3213.33	2705.99	3064.59	4654.31	3970.58	5071.64	4626.9
Eif2s1	1444.81	1712.59	1673.75	1541.83	1011.96	860.518	920.316	865.472	598.533	711.044	1060.6	818.775	819.475	871.304	832.671	919.21
Eif3b	2363.98	2554.98	2341.73	2298.27	1934.15	2068.76	2072.36	2072.34	1621.93	1720.98	1460.94	1649.74	1544.96	1514.77	1576.54	1620.19
Eif4a1	9197.27	9575.24	9040.5	9071.63	5984.7	5916.85	6246.04	6329.87	3530.73	3943.25	3877.67	3693.91	3434.8	3958.84	3652.5	4011.52
Eif4a2	5356.15	5890.55	6316.88	5554.99	4976.82	4226.02	4425.15	4411.3	5582.18	5389.46	7767.92	6930.23	7011.75	8191.08	8242.3	8616.06
Eif4h	5306.26	5423.02	4662.04	4989.24	3824.77	4212.67	4904.4	4592.58	4270.36	4295.63	3879.77	3842.37	4745.19	3848.37	4101.81	4170.38
Eif5a	5852.22	6288.06	5277.09	5896.71	3792.12	4221.1	3895.87	4099.53	3512.12	3706.24	3152.44	3234.11	3471.31	3659.2	3797.58	3885.05
Elovl1	3175.07	3221.27	2690.85	2947.1	6251.29	7025.34	6743.72	6786.94	6884.68	6798.96	6068.03	6244.41	5784.48	4100.37	4278.54	4761.85
Emc1	1455.9	1540.61	1514.94	1555.05	1264.95	1213.86	1162.57	1112.35	1232.73	1192.41	1201.03	1291.87	1292.52	1360.12	1367.27	1378.04
Eml1	1197.23	1153.39	1062.48	1145.36	1138.45	1204.73	1237.62	1244.25	1617.28	1754.54	1511.24	1630.9	921.23	779.478	855.532	751.1
Eno1	2388.93	2457.14	1991.35	2381.34	1441.77	1608.64	1579.94	1531.33	1829.71	1798.58	865.664	1396.02	1785.76	1538.24	1878.13	1830.71
Eno2	46.1896	67.9679	39.0709	59.7853	57.1267	92.0227	63.1977	59.9553	127.15	134.238	134.146	137.386	189.528	182.27	192.561	172.738
Eno3	73.9034	1108.08	74.3607	1400.86	174.1	174.211	142.195	108.625	167.465	424.738	75.4574	107.471	125.057	6108.1	4798.19	287.639
Entpd2	5514.11	4841.17	4160.42	4584.58	2565.26	2917.33	2987.41	2656.37	4704.53	4646.95	3190.17	4366.43	7200.5	4672.04	5121.76	4710.18
Epb41l2	5749.68	5326.21	5791.31	5880.35	9283.09	8884.76	8725.23	8309.1	10817	10610.1	10287.4	10812.5	5422.52	4162.51	4526.49	3540.35
Epb41l3	6519.2	6651.59	6163.12	6068.52	2075.6	2075.08	2119.76	1970.77	1674.65	1832.14	1756.48	1731.73	2406.38	1395.33	1747.99	1327.92
Ephx1	277.138	216.262	219.301	224.037	281.553	278.176	268.59	253.223	666.76	734.116	599.467	727.923	1113.86	1556.2	1281.1	907.643
Eprs	3718.26	3896.83	4015.48	3772.76	3609.86	3286.83	3227.03	3357.5	2826.75	2753.98	3032.97	2826.38	2070.82	2173.43	2329.19	2058.97
Erlin2	1015.25	1027.76	1198.59	1052.85	1079.97	962.375	1005.9	942.356	976.881	960.643	1291.16	1146.73	873.848	888.564	884.548	865.23
Erp29	1524.26	1514.86	1325.89	1416.6	843.299	1137.99	1450.91	1105.29	1414.15	1107.47	1263.91	927.354	1128.62	1157.14	1047.21	1357.22
Esyt1	1794.93	1603.42	1746.85	1666.44	1007.88	997.498	990.097	1079.2	1102.48	1155.71	892.912	1044.8	1563.6	2145.12	2020.57	2506.24
Etf1	1762.6	1918.55	2075.8	1789.78	1270.39	1283.4	1308.72	1229.44	1037.35	1038.25	1341.46	1203.23	1254.46	1392.57	1295.17	1253.12
Etfa	1009.7	1085.43	1053.65	1022.64	992.916	874.567	887.401	962.106	1012.54	902.963	1301.64	1112.38	1160.47	1428.47	1307.48	1221.5
Etfb	395.383	388.241	307.526	414.092	603.911	655.399	672.792	685.606	645.051	648.119	469.513	570.594	512.657	773.265	675.281	699.433
Etfdh	675.292	676.59	763.773	778.467	824.256	741.099	714.924	781.535	755.144	718.385	855.184	848.69	770.539	904.443	935.546	916.126
Ezr	1644.35	1621.96	1547.71	1466.31	2910.74	3222.2	3656.25	3530.31	2436	2187.67	2370.62	2132.8	1368.64	1022.5	1142.17	1127.42
F13a1	1770.91	2618.82	1811.12	2203.87	340.04	275.366	222.508	233.473	488.44	475.078	612.043	530.708	1148.04	3098.58	2412.72	4936.9
Fabp4	1346.89	1591.07	1351.1	1387.65	2029.36	1212.45	1529.91	3620.59	3183.39	3739.8	3452.17	2570.44	8051.83	21468.5	17320.8	19099.1
Fabp5	7663.78	7314.79	6705.07	6531.7	2207.54	2099.66	2309.35	2230.34	1533.55	1498.65	1484	1366.1	868.41	752.552	597.905	721.796
Fam129a	1056.82	812.525	1296.9	1121.45	738.566	696.844	638.56	486.696	710.177	797.04	677.02	671.418	463.722	509.526	482.721	367.067
Fam129b	1761.67	1633.29	1687.61	1789.15	1373.76	1573.52	1680	1654.77	2189.45	2245.35	1534.3	1771.61	3176.92	2589.06	3037.89	2708.28
Fam177a1	54.5037	38.1032	35.2898	51.6041	164.579	152.435	139.562	114.268	184.522	136.336	136.242	162.869	100.978	95.9677	78.2552	98.7072
Fam213a	183.835	161.681	160.065	161.106	292.434	299.25	290.973	333.634	263.603	353.424	375.191	386.675	537.513	493.647	480.962	445.725
Fam49b	1129.8	1340.82	1197.33	1146.62	1386	1290.43	1321.88	1359.22	1166.05	1120.05	1773.25	1403.77	1259.89	1129.52	1065.68	1080.38
Far1	2388	2647.66	2979.47	2216.46	3915.9	3253.81	3614.12	3076.06	3459.4	3020.36	5648.82	3940.98	4093.49	3127.58	2892.81	3155.54
Fasn	3389.39	3399.43	3454.62	3482.02	8792.07	9161.53	10995.1	11229.3	13961.6	12375.1	10886.8	10839.1	9900.5	6813.01	5662.51	6479.97
Fbn1	11013.4	11689.5	13276.5	11999.8	8831.51	8037.59	7698.27	7726.47	12632.8	13130.2	10436.2	12169.7	5418.63	11296.6	9757.28	19116
Fbxo2	0.923792	0	0	0	0	0	0	2.82143	9.30363	7.34116	18.8643	4.4318	27.9631	13.8083	23.7404	19.2787
Fdft1	2033.27	2039.04	2189.23	2147.86	6585.89	6213.99	6596.26	7318.07	7664.64	8121.42	8055.07	8293.01	7074.67	4421.42	5012.73	3830.3
Fdps	1981.53	2143.05	2348.03	2246.04	6415.87	5390	6080.14	6417.33	5309.27	5703.03	5185.6	6029.46	3947.46	2495.16	2979.85	2540.94
Fermt2	11281.3	10435.1	11020.5	10630.4	7631.85	7396.94	6943.85	7482.42	6912.59	6942.64	7296.31	7642.64	6392.68	5903.05	6307.02	6547.83
Fgg	0.923792	2.05963	0	3.77591	0	0.702464	1.31662	0.705356	1.5506	2.09747	0	0	7.76753	9.66581	7.91345	6.1692
Fh	851.736	912.418	797.802	954.676	539.983	540.195	531.914	606.606	449.675	481.37	576.411	468.663	483.141	792.596	713.969	627.716
Fhl1	2662.37	3740.29	2697.15	5504.65	1961.35	1862.93	1905.15	1863.55	2792.64	3090.63	2907.21	3076.78	1631.18	3083.39	3199.67	3123.93
Fis1	717.786	661.142	511.702	603.516	911.307	929.359	938.749	872.526	1285.45	1237.51	1240.85	1153.38	1515.45	1305.57	1289.89	1297.84
Fkbp1a	7240.68	7739.07	6969.74	7014.38	7135.4	7336.53	6142.02	6319.29	8998.16	8794.71	10381.7	9294.59	9589.02	6708.07	7486.12	6725.2
Fkbp3	1876.22	2419.04	1877.92	1994.31	2383	2158.67	2286.97	2069.52	2104.17	2138.37	2617.95	2367.69	2890.3	2363.29	2371.4	2128.37
Flna	13994.5	12055	14999.4	13616.6	8808.39	8712.66	8375.01	8291.46	8514.37	9539.31	7348.71	8054.8	7174.09	7737.48	9470.64	10493
Flnb	2925.65	2851.56	3028.62	2886.68	4393.31	4637.66	4493.62	4651.12	9131.51	7633.76	6835.18	9111.78	6836.21	5681.42	6532.99	6301.84
Flnc	2773.22	3190.37	2462.73	3770.25	1032.36	1282	1248.15	1116.58	962.925	1096.98	800.687	765.593	437.312	868.542	837.947	397.142
Flot1	643.883	664.232	560.856	649.457	799.774	914.608	1029.6	941.651	1614.18	1541.64	1190.55	1464.71	2397.84	1819.93	1842.08	1766.7
Flot2	1339.5	1185.32	1085.16	1205.77	957.552	1073.36	1084.89	1039.7	1407.95	1342.38	1247.14	1224.28	1613.32	1619.71	1536.09	1668
Fmnl2	928.411	832.092	1065	969.78	2226.58	1945.12	1905.15	1827.58	1783.2	1733.56	2737.43	1955.53	1335.24	1054.95	893.341	902.245
Fn1	35069	30610.3	34429	35063.1	24024.5	26396.5	22293	21014.7	29104.8	30251.9	22867.8	28422.2	14463.1	35809.1	22894.5	25222
Fn3krp	727.024	732.2	797.802	757.07	644.715	618.168	628.027	595.321	818.719	788.65	909.681	926.246	1179.11	953.463	946.976	981.674
Fscn1	338.108	320.273	262.153	356.824	462.454	606.226	796.554	663.035	905.553	666.997	505.145	501.901	527.416	300.33	381.604	306.146
Fut8	787.071	852.688	1052.39	833.218	6740.95	6167.63	6176.26	6191.62	7506.48	7322.28	9700.46	8609.88	8728.38	5249.91	5608.88	5061.06
G6pd	1344.12	1339.79	1222.54	1295.77	1041.88	1128.16	1065.14	1101.06	1362.98	1479.77	1553.16	1563.32	2472.41	2067.79	2288.75	2018.87
Gamt	658.664	702.335	540.69	635.612	771.21	942.706	820.253	817.508	767.549	808.576	798.591	699.116	584.895	410.797	385.121	542.118
Ganab	6303.03	6314.84	6320.66	6110.05	6807.6	6821.62	6105.16	6283.31	5808.56	6115.19	6210.56	6487.05	4511.38	3906.37	4206.44	4064.73
Gapdhs	2.77138	0	6.30175	2.51727	2.72032	4.91725	11.8496	5.64285	4.65181	5.24369	2.09604	8.8636	2.33026	2.07124	6.15491	8.48265
Gars	1727.49	1668.3	1677.53	1737.55	1362.88	1398.61	1365.33	1338.06	1149	1314.07	1372.91	1216.53	1010.56	985.912	1052.49	1006.35
Gatm	475.753	1197.68	491.537	1443.66	5790.2	5191.91	5140.08	5155.45	9004.36	8035.42	11081.8	9585.98	8554.39	5479.82	6010.71	5103.47
Gclm	542.266	547.863	481.454	392.065	269.312	236.028	252.791	249.696	285.311	255.892	285.061	311.334	335.557	356.944	320.934	358.585
Gdi1	5102.1	4654.77	4732.62	4925.68	5999.66	6083.34	5760.21	5768.4	7207.21	7462.81	7440.94	7635.99	7306.92	5729.75	6053.79	6398.23
Gdi2	6061	6875.06	7301.21	6086.77	5798.36	5367.52	5586.41	5468.63	4594.44	4481.25	6799.55	5628.39	5766.62	5888.55	5162.21	5748.92
Gfap	180.139	131.817	117.213	169.287	46.2454	83.5932	93.4799	83.9374	683.817	739.36	574.314	651.475	2292.98	1070.83	1703.15	1351.83
Gfpt1	2542.28	2568.36	2862.26	2584.61	2557.1	2259.12	2360.7	1965.12	2552.29	2597.72	2988.95	2797.57	2588.14	2585.6	2146.3	2166.16
Gjb1	7.39034	17.5069	6.30175	11.9571	1067.72	1122.54	1163.89	1062.97	2039.04	1980.02	1741.81	1985.45	1806.73	1102.59	1214.28	1190.66
Gjc3	397.231	356.317	486.495	499.05	2950.19	2672.87	2527.91	2288.88	823.371	747.749	1119.28	847.582	111.076	63.5182	51.8771	64.7766
Glg1	4888.71	4744.37	4926.71	4578.29	4760.56	4777.46	4550.23	4261.06	4848.74	4708.83	4498.1	4637.88	3789.78	3802.11	3648.1	3406.17
Glipr2	566.285	498.431	478.933	468.842	155.058	175.616	204.076	172.812	179.87	179.334	167.683	167.3	136.709	229.908	174.096	169.653
Glod4	811.089	891.821	868.382	788.536	1464.89	1294.64	1548.34	1329.6	3029.88	3030.85	4125	3502.23	3031.67	2307.37	2381.07	2269.49
Glrx3	1167.67	1327.43	1289.34	1173.68	983.395	967.995	967.714	969.16	762.897	807.528	947.409	866.417	870.741	914.8	836.188	1025.63
Glud1	2606.94	2684.73	2656.82	2592.16	2195.3	2043.47	2047.34	2273.36	2766.28	2779.15	3123.1	3082.32	3591.71	4478.03	4252.16	4396.32
Glul	3098.4	3019.42	2784.11	2940.81	4889.77	4488.74	4859.64	5067.28	10587.5	10049	10895.2	12179.7	9684.56	13582.5	11105.2	10742.1
Gmfb	257.738	233.768	270.975	271.236	329.159	314.704	297.556	265.919	308.57	282.11	356.326	331.277	177.877	158.795	158.269	139.578
Gna11	317.784	307.915	332.733	356.194	410.768	402.512	456.867	416.16	431.068	439.421	194.932	401.078	382.939	284.451	364.898	316.943
Gna13	1172.29	1178.11	1202.37	1117.04	1112.61	975.722	913.733	939.535	879.193	1012.03	1087.84	1113.49	1162.02	1315.93	1109.64	1175.23
Gnai1	573.675	560.22	604.968	568.275	1172.46	976.424	1007.21	930.365	976.881	977.423	1203.13	1154.48	964.728	669.702	792.224	677.841
Gnai2	6963.54	6799.88	6299.23	6742.52	4965.94	5170.83	5419.2	5515.89	5410.06	6071.14	4785.26	5370.23	7774.53	7496.52	7601.31	7753.14
Gnai3	5086.4	5369.47	5844.25	5000.56	5699.07	5441.99	5486.35	5364.94	4403.72	4513.76	6361.48	5053.36	4184.37	4223.96	3795.82	3817.96
Gnao1	74.8272	68.9977	80.6624	84.958	95.2111	94.8326	82.947	91.6963	138.004	152.067	69.1693	126.306	156.904	122.894	155.631	121.071
Gnaq	321.48	344.989	413.395	390.807	613.432	576.02	564.829	463.419	466.732	405.861	511.433	438.748	272.64	227.146	198.716	208.982
Gnas	10014.8	9512.42	9162.75	10504	5412.07	5801.65	5632.49	5972.96	5737.24	6211.67	4378.62	4517.11	4370.79	4856.38	4782.36	4276.8
Gnb1	5248.06	4961.66	5454.8	5041.47	4121.28	3911.32	3907.72	4100.94	4090.49	4386.87	4529.54	4617.94	4672.17	4228.79	4280.3	4381.67
Gnb2	3382.93	3278.94	2407.27	2993.67	2376.2	2971.42	3504.84	3237.59	2764.73	2371.19	1783.73	1776.04	2278.99	2186.54	2153.34	2516.26
Gnb4	656.816	633.337	647.82	623.655	583.508	605.524	506.898	487.401	485.339	459.347	352.134	468.663	267.203	248.549	196.957	175.051
Gng12	406.468	348.078	385.667	395.841	299.235	298.547	310.722	270.151	272.906	299.939	362.615	279.203	304.487	359.016	375.449	313.087
Gng2	1743.2	1880.45	1722.9	1695.38	8447.95	7696.19	7814.13	6659.27	10097.5	10976.1	14240.5	9570.47	8501.57	5315.5	5899.04	5357.18
Gng3	68.3606	59.7294	69.3193	51.6041	68.008	44.2552	53.9814	45.1428	66.676	72.3629	77.5534	72.0167	88.5499	89.0635	76.4967	91.7668
Got2	1662.83	1857.79	1565.36	1911.87	1449.93	1418.27	1519.38	1421.29	1612.63	1574.15	1182.17	1513.46	1766.34	2015.32	2090.03	1686.5
Gpd1	109.007	252.305	94.5263	111.389	1356.08	1121.13	1411.41	2602.76	2941.5	2631.28	2823.36	2436.38	4846.94	6545.82	7473.81	5679.52
Gpd1l	700.234	743.528	695.714	728.751	866.421	811.346	832.103	866.883	973.78	971.13	999.81	991.615	911.909	1474.73	1338.25	1658.74
Gpd2	190.301	258.484	234.425	233.477	315.557	280.985	244.891	328.696	153.51	196.114	150.915	192.783	179.43	258.906	256.748	151.916
Gpi	1995.39	2240.88	1755.67	2339.81	2263.3	2540.81	2476.56	2697.99	3392.72	3462.93	2940.74	2703.4	3207.21	3427.22	3462.57	2651.21
Gpx1	2329.8	2130.69	1333.45	1560.08	616.152	656.101	646.46	669.383	770.65	816.966	599.467	766.701	1255.23	2123.72	1964.29	2485.42
Gpx3	482.219	487.103	340.295	404.652	641.995	714.406	787.338	775.892	1338.17	1101.17	987.234	1049.23	7287.5	17046.3	15596.5	9372.55
Gpx4	1220.33	1089.55	812.926	908.107	1176.54	1225.8	1362.7	1323.25	1519.59	1660.15	1150.72	1294.09	2320.16	1941.45	2108.5	1916.31
Gpx7	1674.83	1557.08	1446.88	1530.5	1214.62	1295.34	1091.48	1103.18	1358.33	1387.48	970.466	1264.17	627.617	742.196	678.798	518.984
Gsk3b	260.509	254.365	337.774	295.78	511.42	465.031	396.302	320.232	350.437	341.888	588.987	389.998	198.849	203.672	149.476	128.782
Gsn	1830.03	2191.45	1777.09	2183.11	1921.9	1987.27	2435.74	2798.85	9364.1	11846.5	7814.03	7905.22	66609.7	139759	150486	119869
Gstk1	229.1	187.427	181.491	209.563	171.38	195.285	202.759	163.643	231.04	224.43	173.971	229.346	288.176	264.429	289.281	296.893
Gstm1	518.247	492.252	476.413	516.67	314.197	354.042	341.004	363.259	443.473	506.54	496.761	443.18	837.34	851.972	959.286	933.862
Gstm2	430.487	394.42	389.448	414.092	433.891	450.279	466.083	458.482	1038.9	1101.17	1123.48	1144.51	1973.73	2489.64	2839.17	2487.73
Gstm3	387.993	343.959	328.952	340.461	346.841	313.299	323.888	343.509	412.461	418.446	287.157	414.373	766.656	829.188	840.584	630.8
Gstp1	730.719	720.872	625.134	680.923	670.558	757.256	800.504	866.178	832.675	898.768	949.505	725.707	2819.61	2060.2	2134.87	1928.65
Gypc	727.024	718.812	794.021	741.337	1879.74	1972.52	2118.44	2450.41	1209.47	1211.29	1089.94	1197.69	542.951	920.323	910.926	898.389
Hadh	1096.54	992.743	961.648	1013.83	1190.14	1298.15	1248.15	1381.79	1837.47	1918.14	1733.42	1880.19	1616.42	1595.55	1688.2	1383.44
Hadha	2307.63	2392.26	2374.5	2351.13	2389.8	2415.77	2384.4	2472.98	2704.25	2461.39	2259.53	2548.28	2219.96	2600.1	2636.06	2531.68
Hadhb	2163.52	2494.22	2346.77	2327.22	2059.28	1827.11	1899.88	2029.31	2127.43	2063.91	3018.3	2285.7	2374.54	2906.65	2761.79	2443.77
Hagh	254.043	247.156	161.325	195.089	304.676	347.72	318.622	349.857	365.943	398.52	370.999	337.925	352.646	342.446	354.347	384.033
Hdlbp	11124.3	10699.8	11668.3	10886	8993.37	9044.92	8471.12	8175.79	7864.67	8344.8	7979.62	8207.69	5309.11	6026.63	5593.93	5524.52
Hepacam	221.71	194.635	180.23	196.347	485.577	522.633	502.948	479.642	772.201	725.726	570.122	762.27	968.612	579.948	621.646	653.164
Hibadh	696.539	750.736	669.246	680.923	821.536	880.889	833.419	797.053	998.589	980.569	1664.25	1168.89	1688.66	1598.31	1581.81	1475.98
Hibch	319.632	324.392	322.65	315.289	428.45	378.628	385.769	387.241	446.574	417.397	666.54	511.873	518.871	578.568	588.233	500.476
Hint1	1282.22	1250.2	1097.77	1139.7	1111.25	1234.23	1307.4	1247.78	1111.78	1190.32	876.144	940.65	1102.99	1038.38	1041.94	1056.48
Hist1h1a	1.84758	6.1789	6.30175	0.629318	0	2.10739	0	0	0	0	0	1.10795	0	0	0.879272	0
Hist1h1b	1.84758	4.11927	5.0414	4.40523	1.36016	3.51232	2.63324	0.705356	1.5506	1.04874	0	0	0	0.690415	1.75854	0.77115
Hist1h1e	11.0855	4.11927	1.26035	6.29318	0	2.80985	1.31662	2.82143	3.10121	4.19495	0	1.10795	0.776753	3.45207	0.879272	1.5423
Hist1h3a	1.84758	9.26835	6.30175	5.03455	0	7.02464	3.94985	9.87499	0	2.09747	0	0	6.99078	0	0	0
Hist1h3b	8.31413	9.26835	5.0414	0.629318	0	1.40493	1.31662	0.705356	0	2.09747	0	0	0	0.690415	0	0
Hk1	845.27	765.154	819.228	814.967	952.111	857.708	946.649	913.436	1381.59	1468.23	1465.13	1456.95	1952.76	1423.64	1536.97	1486.01
Hmgb1	6960.77	7539.29	7443.63	5986.71	4635.42	4058.13	4232.93	3990.2	2997.32	2704.69	4493.91	3789.19	3634.43	3543.21	3263.86	3325.97
Hmgcs1	5274.85	5875.11	6492.07	6054.04	36090.5	30332.4	38949.5	36483.1	46423.5	47594.8	64264.5	54670.7	45283.9	27990.8	28064.6	22074.9
Hnrnpa2b1	9239.77	9530.95	10103	9243.43	6645.74	5557.19	6232.87	5911.59	4112.2	4198.09	5179.31	4830.66	3479.08	3729.62	3765.04	4427.94
Hnrnpa3	1507.63	1425.27	1865.32	1434.85	1062.28	915.31	792.604	920.49	615.59	535.905	1184.26	750.082	460.615	557.165	468.652	662.418
Hnrnpd	4265.15	4671.25	4534.74	4283.14	2180.34	2164.29	2151.35	2440.53	1195.52	1229.12	1481.9	1446.98	1109.98	1318	1335.61	1150.56
Hnrnpk	8024.98	8779.19	8630.88	7704.12	7354.38	6718.36	7365.16	7377.32	4903.01	4817.9	6814.22	5933.07	6178.3	5695.92	5399.61	5342.53
Hpcal1	446.192	397.509	344.076	414.092	204.024	212.144	169.844	208.785	189.174	209.747	132.05	151.789	223.705	457.055	349.95	441.869
Hras	492.381	561.25	305.005	528.628	504.619	585.855	516.114	563.58	629.545	682.728	630.908	512.981	661.794	602.732	543.39	620.004
Hsd17b10	604.16	607.592	577.241	570.792	633.834	716.513	613.544	639.758	880.743	880.939	651.868	799.94	986.477	933.441	929.391	915.355
Hsd17b11	985.686	887.702	829.311	835.106	2815.53	2611.76	2392.3	2434.89	4276.57	4312.41	3997.14	4486.09	4648.09	3024.02	3237.48	2820.09
Hsd17b12	1459.59	1698.17	1617.03	1377.58	1819.89	1657.81	1777.43	1809.24	1866.93	1731.46	2146.34	1986.55	2548.53	2123.72	2250.06	2347.38
Hsd17b4	1412.48	1261.53	1427.98	1388.28	1588.67	1546.12	1482.51	1495.36	2011.13	1864.65	1783.73	2121.72	2224.62	2142.36	2099.7	1981.85
Hsd17b7	299.309	297.617	376.845	345.496	1387.36	1230.01	1508.84	1495.36	1003.24	1073.91	1201.03	1268.6	953.076	463.268	556.579	389.431
Hsp90aa1	12.0093	2.05963	55.4554	49.0868	78.8892	9.13203	36.8653	25.3928	27.9109	27.2672	12.5762	27.6987	1.55351	2.07124	7.03418	0
Hsp90ab1	24184.9	25794.9	24914.6	26210.5	20070.5	20240.8	19642.6	20550.6	18303.3	18218.7	17984	18864	17275	15861.6	15713.5	20875
Hsp90b1	16771.4	18496.5	18547.3	17574.3	10301.8	9870.32	9261.09	9211.25	10381.3	9805.69	13550.9	11398.6	10430.2	9074.12	9891.81	13817.5
Hspa12a	3421.73	3395.31	3401.69	3236.58	5727.63	5427.23	5428.42	5455.93	7334.36	6893.35	7732.29	7813.26	7877.06	4756.96	5127.92	5490.59
Hspa12b	427.716	415.016	431.04	482.687	310.116	299.952	354.17	304.714	393.854	382.789	220.084	261.476	358.86	389.394	508.219	676.298
Hspa1a	7.39034	3.08945	0	0	19.0422	33.0158	84.2636	34.5625	125.599	75.5091	104.802	79.7724	123.504	24.1645	60.6698	6.94035
Hspa1l	4.61896	11.328	10.0828	14.4743	5.44064	9.13203	14.4828	8.46428	15.506	12.5848	0	16.6192	31.0701	23.4741	27.2574	23.1345
Hspa2	813.861	1004.07	660.424	838.881	1392.8	1615.67	1541.76	1553.19	5078.23	4947.94	4925.69	4605.75	9359.88	5212.63	5776.82	6369.7
Hspa5	17673.1	20332.7	18645.6	18303.1	9870.68	10479.4	9017.52	9252.86	8266.27	7695.63	9954.09	8502.41	7280.51	7452.34	7567.02	15571.8
Hspa8	233.719	302.766	202.916	218.374	6.8008	23.1813	23.6991	12.6964	4.65181	18.8773	4.19208	24.3749	16.3118	73.8744	41.3258	35.4729
Hspa9	2292.85	2686.79	2768.99	2718.03	2943.38	2550.65	2618.75	2628.16	2156.89	2233.81	3343.18	2622.52	2534.55	2644.98	2677.38	2462.28
Hspb1	198.615	320.273	142.42	375.703	87.0502	158.054	139.562	146.009	212.433	263.233	136.242	204.971	532.853	669.012	655.058	1180.63
Hspd1	4924.74	6325.14	5817.78	5582.68	3065.8	2795.81	2959.76	2970.96	2315.05	2268.42	3542.3	2767.66	2357.45	2602.17	2419.76	2870.99
Idh1	1950.12	2008.14	2148.9	1851.45	1955.91	1624.1	1964.39	2094.91	1611.08	1606.67	1754.38	1774.94	1808.28	2225.9	2040.79	1616.33
Idh2	2874.84	3120.35	2762.69	3440.48	1585.95	1774.42	1653.67	1618.79	1142.8	1298.34	951.601	1029.29	854.429	1228.25	1287.25	1047.22
Idh3a	1281.3	1515.89	1343.53	1347.37	1663.47	1494.14	1550.98	1551.78	1563.01	1466.13	1548.97	1569.97	1562.05	1654.92	1628.41	1338.72
Idh3g	1039.27	947.432	1023.4	1125.22	960.272	877.377	859.752	912.731	834.225	868.354	903.392	931.786	971.719	1242.75	1337.37	1246.18
Idi1	1798.62	1987.55	2359.38	1964.1	8030.38	6499.19	8149.87	7473.96	8027.48	7606.49	13766.8	10247.4	7121.28	4179.77	4524.74	3728.51
Ikbip	1442.04	1393.34	1642.24	1470.09	1150.69	1089.52	1098.06	1065.09	1009.44	965.887	1131.86	1045.9	771.316	869.232	758.812	687.094
Ilk	4363.99	4265.5	3913.39	4097.49	3019.55	2925.76	2849.16	2928.64	2943.05	3058.12	2657.78	2802.01	2672.03	2495.16	2572.75	2570.24
Immt	1637.88	1705.38	1683.83	1643.15	1489.37	1408.44	1420.63	1476.31	1314.91	1285.75	997.714	1278.57	1224.16	1273.82	1315.39	1256.97
Ina	65.5892	27.8051	52.9347	42.1643	1.36016	2.80985	6.58309	2.82143	10.8542	0	0	2.2159	28.7399	3.45207	0.879272	1.5423
Ipo5	2449.9	2573.51	2743.78	2624.26	1614.51	1578.44	1497	1591.28	1511.84	1591.98	1504.96	1487.98	1655.26	1621.78	1584.45	1413.52
Iqgap1	4069.3	4090.43	4674.64	4101.27	2587.02	2447.38	2437.06	2312.86	2397.23	2313.51	2672.45	2497.32	2131.41	2528.3	2257.09	2562.53
Islr	2881.31	2981.32	2438.78	2759.56	1474.41	1782.15	1587.84	1542.61	2794.19	3157.75	2234.38	2531.67	1620.31	1930.4	2059.26	2147.65
Isoc1	121.017	130.787	128.556	124.605	121.054	106.774	98.7464	107.92	99.2387	109.069	161.395	87.528	61.3635	65.5894	72.9796	53.2093
Ist1	1765.37	1743.48	1736.76	1766.5	2052.48	2033.63	2023.64	2128.06	2161.54	2203.4	2303.55	2168.26	2017.23	1712.92	2051.34	1880.06
Itga6	14377.9	14813.9	15370	13669.4	29572.6	27702.4	27135.5	25968.4	29129.7	28664.1	35209.3	31268.6	23636.6	14834.9	15034.7	14284.8
Itgav	830.489	735.289	971.73	803.01	567.186	543.004	527.964	478.232	761.347	707.897	850.992	756.73	657.133	468.792	413.258	444.953
Itgb1	16498.9	16303	18070.9	16198	14851.6	13501.4	13665.2	13694.5	13377.1	12864.9	16497.9	14437.7	11051.6	10418.4	9766.96	10994.3
Itgb4	3695.17	3130.64	2855.95	3122.05	5297.82	6011.68	6567.29	6314.35	17231.9	15028.4	10698.2	13883.7	19286	14426.9	16347.4	18419.7
Itpr3	2847.13	2518.93	2429.96	2524.83	7796.43	9205.79	9461.22	8533.4	10964.3	10251.4	8109.57	8608.77	6492.11	3887.73	4359.43	3896.62
Ivd	495.153	532.415	480.194	575.197	652.876	649.779	631.977	627.767	756.695	715.239	798.591	786.644	995.798	1141.95	1270.55	1010.98
Jam3	1158.44	1181.2	1138.1	1135.29	1730.12	1897.35	1843.27	1865.67	2645.33	2494.95	2064.6	2629.17	3208.77	2099.55	2186.75	2175.41
Jup	1072.52	865.046	932.66	949.012	911.307	1031.22	1215.24	1170.89	1646.74	1604.57	850.992	1274.14	1323.59	1050.81	1220.43	1272.4
Kif5a	4006.49	3510.65	4404.93	3950.23	761.689	774.817	987.464	1075.67	283.761	277.915	303.926	214.942	871.517	584.091	677.919	588.387
Kif5b	2227.26	2302.67	2871.08	2504.69	4220.57	3602.94	3645.72	3091.58	3823.79	3761.82	5837.47	4737.59	2421.14	2084.36	1892.19	1832.25
Kif5c	1036.49	1044.23	1283.04	945.236	486.937	429.908	508.215	542.419	286.862	256.941	270.389	347.896	424.107	269.262	260.265	255.251
Kit	189.377	177.128	281.058	192.571	273.392	306.977	273.857	392.883	251.198	280.013	167.683	339.033	187.974	402.512	374.57	319.256
Klc1	2017.56	1914.43	1692.65	1927.6	1879.74	2089.83	2028.91	2166.85	2265.43	2369.1	2221.8	2063	2348.9	1998.06	1943.19	2108.32
Klc2	336.26	316.154	356.679	331.651	384.925	468.543	513.481	462.714	505.497	474.029	511.433	421.021	455.178	401.821	400.069	491.994
Kpna4	842.498	870.195	1030.97	938.943	650.156	607.631	599.061	646.106	579.926	584.147	890.816	657.014	655.58	776.717	658.575	675.527
Kpnb1	9062.4	9449.6	10361.3	9281.82	5510.01	5111.13	5024.22	5024.96	4181.98	4177.12	5292.5	4780.8	4142.43	3574.28	3348.27	3646
Kras	695.615	841.36	874.683	785.389	1055.48	867.543	757.056	703.946	641.95	638.681	1102.52	823.207	598.877	575.806	507.34	577.591
Lama2	12105.4	11438.2	12563.2	11643	17430.4	16063.9	14721.1	14021.8	12304	12438	14033	13017.3	6629.59	4899.18	5063.73	3947.52
Lama4	18340	16864.3	18059.6	17764.4	10489.5	10039.6	10184	10822.3	7766.98	7257.26	6428.55	7559.54	3482.96	3789	3331.56	3544.2
Lamb1	25345.2	23382	25294	24645.4	28054.6	26330.4	26532.5	25839.3	22541.1	22483.9	21788.3	22539	11014.4	7078.13	7744.63	7013.61
Lamb2	4400.95	3798.99	3604.6	4037.71	4356.59	4946.05	5665.41	5042.59	11076	10025.9	7340.33	8771.64	9522.22	10011.7	10345.5	10576.3
Lamc1	14959	13516.3	15344.8	14844.4	14608.1	14796.7	13008.2	12517.3	12759.9	11974.5	11851	11603.6	5166.96	4302.67	4329.54	4053.93
Lamp1	5533.51	5445.67	5525.38	5425.35	8992.01	9013.31	7943.16	7908.46	14752.5	10652	10543.1	11880.5	17076.1	15632.4	14511.5	14451.3
Lamp2	1783.84	1829.98	2017.82	1808.66	3284.78	2979.85	3030.86	2944.86	4467.29	4652.2	6242	5432.28	6211.7	5987.28	5448.85	5156.68
Lancl1	940.42	997.893	1057.43	926.357	1048.68	1205.43	1142.82	1141.97	1217.22	1239.61	1509.15	1224.28	1415.24	1335.95	1192.29	1204.54
Lap3	1343.19	1405.7	1285.56	1215.21	1137.09	1107.79	1155.99	1144.09	1324.22	1320.36	1163.3	1393.8	1639.73	1752.96	1784.92	1799.09
Lasp1	8014.82	7555.77	7494.05	7249.12	3624.82	3648.6	3762.9	3539.48	3893.57	4143.56	3412.35	3851.23	3627.44	4001.64	3736.03	4916.08
Lcp1	510.857	619.95	536.909	563.24	557.665	572.508	545.08	663.035	427.967	393.276	488.377	525.168	803.163	1668.73	1235.38	1637.92
Ldha	6715.97	7345.68	6401.32	6970.33	3729.56	3836.15	4161.83	4006.42	4163.37	4437.21	3839.94	4089.44	5873.03	7085.04	6336.04	5223.77
Ldhb	1621.26	1528.25	1296.9	1505.96	3567.7	3784.17	3616.75	3696.77	5912.45	5636.96	4697.22	5327.02	6177.52	4220.51	4825.45	4560.58
Letm1	321.48	330.571	399.531	332.28	489.657	545.112	518.748	513.499	559.768	534.856	526.106	476.418	404.689	394.227	351.709	299.977
Limch1	885.917	785.75	892.328	897.408	2236.1	2039.95	2128.97	2010.27	5931.06	5544.67	6705.23	6062.7	4192.14	3090.3	3331.56	2557.13
Lin7c	271.595	273.931	344.076	285.711	519.581	475.568	412.102	418.982	319.425	294.695	383.575	375.595	309.925	269.952	222.456	199.728
Lman2	1056.82	1021.58	916.275	1032.71	767.13	854.898	886.084	849.954	921.059	953.302	412.92	809.911	792.288	902.372	932.908	1098.89
Lmna	4266.07	4411.74	3263.05	4132.73	3378.64	3945.04	5300.71	4600.33	4237.8	4054.42	2986.85	3123.31	3924.16	3978.86	3783.51	4336.17
Lpp	12.0093	11.328	12.6035	11.3277	16.3219	5.61971	13.1662	14.1071	6.20242	14.6823	8.38415	4.4318	8.54429	6.90415	7.91345	9.2538
Lrrc57	521.942	490.193	552.034	493.386	530.462	476.973	526.647	473.999	482.238	538.002	534.49	604.941	582.565	569.592	555.7	579.905
Lrrc59	3846.67	4094.55	3917.17	3775.28	2645.51	2776.14	2795.18	2684.59	1885.54	1927.58	1725.04	1864.68	1239.7	1627.31	1439.37	1489.86
Lss	1259.13	1128.68	1112.89	1256.75	6598.13	6395.93	7122.91	8252.67	8318.99	10083.6	9352.52	9953.82	5439.6	2836.91	3153.95	2529.37
Lum	16281.8	16047.6	17207.6	15687	12833.1	11998.1	11874.6	9539.24	18951.5	18442	18717.6	19735.9	12383	11857.2	9047.71	4295.3
Lxn	387.069	358.376	400.792	387.66	248.909	246.565	219.875	221.482	291.514	295.744	345.846	263.692	341.772	316.21	317.417	359.356
Lypla2	277.138	270.842	180.23	232.219	198.583	230.408	344.954	294.134	279.109	226.527	169.779	180.596	314.585	281.689	266.42	333.137
Lyz2	1675.76	1920.61	1745.59	1797.33	1376.48	1493.44	1612.86	2139.35	2133.63	2555.77	2054.12	2886.21	4746.74	7845.87	5371.47	7622.81
M6pr	0.923792	0	0	0.629318	12.2414	9.13203	2.63324	0.705356	23.2591	13.6336	0	4.4318	2.33026	0	0	0
Macrod1	8.31413	33.984	10.0828	37.1298	21.7625	24.5862	28.9656	29.625	41.8663	36.7058	2.09604	19.9431	70.6846	193.316	129.253	60.1497
Mag	686.377	555.071	507.921	544.36	7894.36	9469.21	9599.46	9054.66	8074	7323.33	5508.39	6227.79	3555.98	1933.16	2077.72	1947.15
Maoa	704.853	675.56	737.305	662.672	1131.65	990.474	1017.75	932.481	1904.14	1821.66	2552.97	2398.71	3052.64	2225.9	2207.85	1986.48
Map1a	1059.59	993.773	1029.71	1163.61	837.858	1079.69	1041.45	725.812	1519.59	1431.53	1490.28	1203.23	1931.01	1238.6	1152.73	869.086
Map1b	3964.92	3710.43	3778.53	3736.89	4349.79	4104.5	4334.31	3703.12	5172.82	5710.37	6766.01	5750.26	4526.14	3253.23	3449.39	3369.15
Map1lc3a	962.591	1008.19	699.495	892.374	851.46	1001.01	895.3	967.044	1490.13	1576.25	1052.21	1300.73	1655.26	1455.39	1508.83	1502.2
Map1lc3b	611.55	581.847	499.099	557.576	680.08	759.363	714.924	708.883	820.27	979.52	509.337	820.991	911.909	932.06	1008.53	900.703
Map2k4	187.53	171.979	233.165	216.486	206.744	197.392	193.543	193.973	203.129	191.919	167.683	207.187	222.928	187.102	194.319	172.738
Map4	13160.3	12883	12961.4	13379.3	16660.6	16626.6	16470.9	16609.7	19460.1	19129	19614.7	18678.9	15793.7	14244.6	13656.9	12393.9
Map6	220.786	213.172	170.147	193.83	308.756	314.704	376.553	363.259	379.898	330.352	341.654	366.731	352.646	250.621	266.42	250.624
Mapk1	1003.24	996.863	1030.97	1022.01	833.778	830.312	733.356	743.446	738.088	677.484	534.49	787.752	653.25	669.012	604.939	622.318
Mapk3	2810.18	2732.1	2600.1	2629.29	3998.87	4136.81	4297.44	4155.25	7441.35	7588.66	6644.44	6967.9	9610.77	6638.34	7282.13	6820.05
Mapre1	3739.51	3852.54	4055.81	3601.59	2542.14	2334.99	2446.28	2290.29	1693.26	1671.69	1869.67	1719.54	1471.17	1574.84	1433.21	1580.86
Mapre3	472.982	449	397.01	441.152	1758.69	2167.1	2176.37	2137.94	2539.89	2459.29	2364.33	2348.85	2168.7	1306.96	1486.85	1118.94
Mapt	216.167	165.801	181.491	180.614	160.499	221.276	208.026	184.803	251.198	315.67	278.773	273.664	414.786	405.274	407.982	340.077
Marc2	368.593	336.75	340.295	342.979	594.39	635.027	609.594	608.723	795.46	902.963	435.976	883.036	658.687	731.84	780.794	686.323
Marcks	30913.8	33754.3	31407.9	24871.3	18178.5	15662.8	18123.3	16499	6890.89	6103.65	9293.83	8037.07	6377.15	5912.71	5253.65	5374.14
Mat2a	4088.7	4703.17	4979.65	4444.25	3345.99	2884.32	3190.17	3291.9	3338.45	3175.58	4013.91	3973.11	3842.6	5098.02	3971.67	5454.34
Mbp	12409.3	10351.7	9350.54	9423.41	247654	281945	315721	287308	427312	390704	344469	354815	219042	147328	144859	126841
Mcam	15360.8	14368	14951.5	14206.9	10262.4	10891	10078.7	10723.5	5439.52	5992.48	4898.44	5284.92	4431.38	4517.38	4967.01	5057.97
Mcts1	323.327	397.509	362.981	333.539	345.48	297.845	330.471	296.25	279.109	228.625	345.846	301.362	309.148	389.394	368.415	383.261
Mdh1	2147.82	2388.15	2010.26	2284.43	1803.57	1732.28	1765.59	1943.96	1866.93	1987.36	1867.57	1941.13	2052.18	2960.5	2848.84	2768.43
Mdh2	1752.43	2027.71	1610.73	1944.59	1609.07	1698.56	1836.68	1742.23	1575.41	1622.4	1540.59	1446.98	1485.93	1855.84	1906.26	1497.57
Mdp1	314.089	321.303	278.538	257.391	310.116	284.498	323.888	274.384	258.951	268.477	408.727	308.01	328.567	315.52	298.953	295.35
Me1	682.682	558.161	965.429	631.836	387.645	342.802	330.471	334.339	821.82	1002.59	1274.39	1130.11	2074.71	1989.78	1944.95	1574.69
Mgll	115.474	147.264	137.378	191.942	1728.76	1676.78	1864.33	1688.62	5762.05	5660.03	5717.99	5414.55	5589.52	4056.19	5007.46	4090.95
Mgst3	306.699	333.661	240.727	303.331	612.072	597.094	564.829	576.276	804.764	829.551	450.648	751.19	710.729	566.831	593.509	586.074
Mical1	1500.24	1444.83	1322.11	1415.34	2512.21	2624.4	3042.7	2978.01	2769.38	2489.7	2125.38	2250.25	2229.28	1481.63	1590.6	1510.68
Mlec	2539.5	2430.37	2564.81	2507.2	2212.98	2390.48	2389.66	2123.83	3068.65	2993.1	3257.24	2931.64	2385.41	2130.62	2004.74	2222.45
Mme	346.422	380.002	391.969	319.064	5636.5	4763.41	5005.78	4107.29	3138.42	3172.43	4101.95	3651.8	917.346	915.49	716.607	555.999
Mpc1	706.701	778.542	732.264	620.508	1248.63	1226.5	1213.92	1196.28	1747.53	1545.84	2217.61	1654.17	1988.49	1808.89	1592.36	1917.08
Mpp2	39.7231	30.8945	44.1123	33.3539	50.3259	52.6848	39.4985	47.2589	75.9796	48.2419	14.6723	58.7213	50.489	53.1619	58.9112	37.0152
Mpp6	564.437	555.071	519.265	526.74	4729.27	4286.43	4319.82	4155.96	2437.55	2061.82	2743.71	2355.5	810.931	593.066	693.746	478.884
Mpst	365.822	294.528	231.905	281.935	341.4	390.57	550.346	527.607	609.388	470.883	398.247	395.538	455.954	561.307	537.235	521.297
Mpz	35265.8	32481.5	29209.9	29058.8	1.21229e+06	1.32063e+06	1.29661e+06	1.23437e+06	1.98477e+06	2.01358e+06	1.84581e+06	1.99431e+06	1.29718e+06	766361	817613	697867
Mrc1	856.355	1536.49	1096.51	1225.91	753.528	823.287	649.093	830.204	553.566	672.24	804.879	816.559	724.711	2742.33	1480.69	2908.01
Mrps36	346.422	417.076	281.058	319.064	431.17	389.165	339.688	386.535	307.02	381.74	419.208	354.544	389.93	398.369	345.554	357.813
Msn	7336.76	7279.78	8279.24	7305.13	6921.85	6239.98	6372.43	6351.73	6827.31	7077.93	7617	7586.13	7403.24	7162.36	8171.96	8316.08
Mtch2	784.299	800.168	812.926	789.165	771.21	674.365	691.225	693.365	607.837	550.587	842.607	648.151	651.696	788.454	746.502	709.458
Mthfd1	518.247	519.028	569.679	534.921	443.412	440.445	367.337	439.437	446.574	459.347	467.417	383.351	455.954	385.942	437.878	385.575
Mtmr2	1656.36	1610.63	1773.31	1596.58	2762.48	2466.35	2417.31	2546.34	2187.9	2057.62	2907.21	2736.64	2515.9	1821.31	1675.01	1596.28
Mvk	230.024	183.307	149.982	213.968	520.941	473.46	687.275	567.812	572.173	547.441	423.4	481.958	415.563	274.785	293.677	259.877
Myadm	7182.48	6913.16	6973.52	7375.61	2487.73	2718.53	2659.57	2655.67	2839.16	3058.12	2257.43	2511.72	1473.5	3166.93	2031.12	3880.43
Myh10	3282.23	3272.76	3691.57	3303.29	1962.71	2002.02	2130.29	2018.73	1417.25	1340.29	1299.54	1297.41	583.342	760.147	603.181	653.164
Myh11	909.935	210.083	1759.45	868.459	598.47	461.519	447.65	594.615	1972.37	2770.76	1951.41	2217.01	3240.62	2970.16	4588.04	4617.64
Myh14	747.348	644.665	622.613	606.034	2123.21	2465.65	3367.91	2736.08	4061.03	3059.17	3060.22	2687.89	3122.55	1905.55	1936.16	1839.96
Myh4	34.1803	1563.26	35.2898	1202	212.185	115.907	25.0157	23.2768	190.724	2458.24	2.09604	12.1874	68.3543	50802.8	31047.1	1277.02
Myh9	2767.68	2479.8	2987.03	2806.76	3242.62	3486.33	3277.06	3793.41	4296.72	4050.22	3695.32	3433.54	3236.73	3752.4	4336.57	4013.06
Myl12b	2101.63	1921.64	1807.34	1971.03	2123.21	2290.03	1976.24	2386.22	2271.64	2550.53	2177.78	2169.37	2826.61	2573.87	2548.13	2792.33
Myl6	7718.28	7048.07	6901.68	6937.61	6489.32	6493.57	6781.9	6389.12	8353.11	8725.49	7323.56	8099.11	8941.99	9052.72	9790.7	10729
Myl9	2111.79	1622.99	2363.16	2154.79	1547.86	1383.15	1547.03	1520.04	1942.91	2424.68	1660.06	1924.51	2123.64	2221.06	2783.78	3154
Myo18a	742.729	856.808	724.702	852.727	1169.74	1399.31	1443.01	1324.66	1764.59	1784.95	1699.89	1557.78	1524.77	1214.44	1325.06	1298.62
Myo1b	716.863	673.5	949.044	763.993	1504.34	1316.42	1420.63	1310.55	2840.71	2896.61	4288.49	3290.61	2863.89	2194.83	2406.57	1961.03
Myo1c	2386.15	2100.83	2383.32	2392.67	2550.3	2422.09	2480.51	2649.32	3220.61	3357.01	2888.34	3182.03	3450.34	3563.92	3794.06	3521.84
Naga	643.883	576.697	570.939	583.378	749.448	892.129	770.222	823.151	935.014	955.399	850.992	888.576	748.79	824.355	757.933	825.901
Nap1l1	5788.48	6675.27	6890.34	5564.43	3042.68	2703.08	2883.39	2761.47	2194.11	2322.95	2894.63	2713.37	2850.69	2957.74	2985.13	2746.84
Nap1l4	2358.44	2474.65	2499.28	2427.28	2006.23	1791.28	1988.09	1891.77	1874.68	1865.7	2284.68	2060.79	2089.47	1926.95	1901.87	1846.9
Napa	904.392	924.776	718.4	863.425	852.82	939.896	1001.95	901.445	894.699	937.571	775.534	911.843	1032.31	1044.6	1115.8	1023.32
Napb	17.552	18.5367	36.5502	15.1036	31.2837	28.801	27.649	26.8035	18.6073	23.0722	27.2485	19.9431	35.7307	15.1891	16.7062	16.9653
Naxd	193.996	188.456	168.887	190.054	199.943	216.359	239.625	255.339	246.546	197.163	228.468	201.647	213.607	216.79	228.611	247.539
Ncam1	4303.95	4027.61	4546.09	4244.75	1301.67	1346.62	1257.37	1108.11	865.237	800.186	817.455	819.883	1326.69	664.179	588.233	646.995
Ncdn	399.078	373.824	305.005	387.66	469.255	487.51	649.093	526.196	615.59	524.369	459.032	409.941	744.13	497.789	506.461	475.028
Nckap1	3124.26	3136.82	3750.8	3252.32	3503.77	3039.56	3057.19	2971.67	2997.32	2970.02	4219.32	3575.35	3552.87	3202.83	2987.77	3140.89
Ncl	6443.45	7270.51	7381.87	7209.47	5824.2	5248.11	5291.49	5375.52	3766.42	3976.81	5269.44	4599.1	3552.87	3760	3531.16	3009.03
Ncmap	1.84758	3.08945	0	0	1755.97	2172.72	3429.79	2286.06	6735.83	4581.93	3879.77	4011.89	4176.6	2470.99	2457.57	2889.5
Ndrg1	2704.86	2391.23	2411.05	2381.34	15937	16514.2	15200.4	14063.4	35843.8	34701.7	37372.4	37648.1	53242.6	41962	45071.5	45687.5
Ndrg2	2334.42	2086.41	2227.04	2173.04	3215.42	3254.51	3525.9	3524.67	5802.36	5673.67	5831.18	6525.83	7832	7332.9	7308.51	6217.78
Ndrg4	697.463	641.576	603.708	641.905	779.371	845.064	838.686	828.794	1248.24	1467.18	1419.02	1381.61	1579.92	849.901	954.89	760.354
Ndufa12	525.638	521.087	384.407	490.868	263.871	330.86	330.471	327.285	350.437	288.403	201.22	265.908	466.052	451.531	405.345	420.277
Ndufa13	323.327	319.243	219.301	305.849	359.082	429.205	488.465	463.419	548.914	499.199	440.168	404.402	594.216	494.337	539.873	552.143
Ndufa2	581.989	603.473	534.389	558.835	520.941	504.369	520.064	497.276	499.295	499.199	473.705	497.47	555.379	546.118	587.354	562.168
Ndufa3	241.11	279.08	221.822	220.891	186.342	199.5	201.443	164.348	162.813	201.358	155.107	194.999	198.072	256.834	218.939	257.564
Ndufa4	1502.09	1788.79	1329.67	1623.64	1221.42	1165.39	1036.18	1190.64	1045.11	996.3	972.562	1063.63	1143.38	1469.89	1348.8	1384.98
Ndufa5	469.286	544.773	502.88	470.73	458.374	382.843	447.65	418.276	569.072	545.343	379.383	540.68	702.962	747.719	741.227	714.856
Ndufa6	472.982	558.161	393.229	506.601	559.025	585.152	606.961	596.731	572.173	603.024	419.208	558.407	821.805	851.282	816.844	809.707
Ndufa7	306.699	302.766	214.26	281.935	315.557	368.793	431.851	380.187	429.517	442.567	297.637	407.726	545.281	497.099	466.014	515.128
Ndufa8	542.266	580.817	434.821	522.964	462.454	559.161	452.917	527.607	550.465	569.464	421.304	498.577	544.504	634.491	682.315	683.239
Ndufa9	778.757	892.851	794.021	864.054	805.214	823.99	803.137	838.669	755.144	760.334	618.331	794.4	728.595	927.918	888.944	761.896
Ndufb10	626.331	685.858	501.62	611.698	433.891	629.407	585.895	634.821	674.513	646.022	387.767	555.083	771.316	764.289	733.313	815.876
Ndufb11	796.309	820.764	695.714	796.717	730.406	864.03	972.981	894.392	908.654	786.553	637.196	757.838	852.099	751.862	844.981	857.518
Ndufb3	511.781	609.652	481.454	538.067	486.937	491.725	501.632	509.267	592.331	508.637	572.218	507.441	588.002	676.607	691.108	640.054
Ndufb4	474.829	458.268	337.774	419.755	526.382	566.186	621.444	584.74	640.4	618.755	578.507	487.498	627.617	770.503	712.211	655.477
Ndufb6	263.281	292.468	178.97	247.951	204.024	261.316	268.59	242.643	257.4	214.991	155.107	196.107	260.989	287.903	243.558	280.698
Ndufb7	382.45	402.658	293.662	327.246	421.649	453.089	531.914	478.232	457.428	414.251	257.813	326.845	400.805	424.605	435.24	444.182
Ndufb8	1037.42	1041.14	938.961	1008.8	977.954	1083.2	1136.24	1028.41	1085.42	1088.59	907.585	989.399	1035.41	1168.87	1245.93	1017.92
Ndufc2	401.85	444.881	347.857	415.35	427.09	410.239	462.133	445.08	415.562	346.083	280.869	353.436	521.978	539.904	504.702	596.87
Ndufs1	1413.4	1585.92	1517.46	1723.7	1188.78	1197	1144.14	1158.2	1156.75	1214.44	1634.91	1290.76	1282.42	1581.74	1581.81	1344.11
Ndufs2	1624.95	1626.08	1585.52	1780.97	1961.35	1940.91	1728.72	1844.51	1631.24	1617.15	1320.5	1749.45	1674.68	1816.48	1889.56	1672.62
Ndufs3	627.255	610.681	519.265	589.042	688.241	717.215	734.673	718.053	705.525	665.948	576.411	689.145	732.478	796.048	699.901	660.875
Ndufs4	1019.87	1104.99	1057.43	1013.83	1354.72	1301.67	1286.34	1224.5	1203.27	1279.46	1613.95	1523.43	1489.04	1270.36	1411.23	1374.96
Ndufs7	145.035	137.995	60.4968	117.683	144.177	203.012	313.355	256.75	294.615	216.04	129.954	181.704	350.316	306.544	341.158	299.206
Ndufs8	365.822	339.84	259.632	349.272	325.078	401.107	495.048	450.723	505.497	356.571	427.592	323.521	334.004	360.397	373.691	392.515
Ndufv1	921.944	933.014	705.796	896.149	735.846	972.21	1087.53	1037.58	1028.05	892.475	500.953	750.082	871.517	985.912	979.509	1010.98
Ndufv2	919.173	873.285	862.08	967.892	1298.95	1330.47	1362.7	1422.7	1549.05	1510.18	1737.62	1562.21	1534.09	1512.01	1411.23	1523.02
Nedd4	27636.2	27127.4	29749.3	28171.4	19085.8	18472.7	17949.5	17442.1	15417.7	15755.2	17942.1	16752.2	14000.2	17111.9	15664.2	15304.2
Nefh	73.9034	63.8486	65.5382	103.838	73.4486	89.9153	85.5802	110.741	68.2266	48.2419	41.9208	44.318	41.9447	23.4741	20.2233	20.821
Nefl	443.42	554.041	448.685	484.575	2431.96	2427.01	1674.74	1891.06	308.57	175.139	232.66	381.135	308.371	160.867	419.413	178.907
Nefm	300.232	360.436	332.733	351.789	2582.94	2261.93	1291.6	1669.58	246.546	202.406	205.412	240.425	217.491	110.466	131.891	102.563
Nes	5374.62	6394.13	6507.19	7034.52	8128.31	8102.22	9059.65	8283	13426.7	14337.3	18000.8	15598.8	19197.5	12157.5	15844.5	11163.9
Nfasc	35.1041	20.5963	30.2484	24.5434	6157.44	6330.6	5962.96	5405.85	10421.6	10053.2	9744.48	10373.7	8789.74	5182.25	5878.81	5357.18
Nid1	29391.4	30510.4	32977.1	28479.8	24235.3	22839.9	22254.8	21196.7	30884.9	31636.2	36108.5	32967.1	16544.1	12678.8	11526.4	11106.9
Nid2	9709.05	8968.67	7819.22	7872.77	8026.3	8498.41	9143.91	8889.61	6079.92	5631.72	5116.43	5196.29	2221.51	1637.66	1475.42	1326.38
Nipsnap1	676.216	647.755	651.601	596.594	447.492	465.031	468.716	495.866	338.032	371.253	394.055	368.947	368.958	300.33	342.037	281.47
Nipsnap3b	454.506	447.97	442.383	452.48	179.541	192.475	226.458	239.116	120.947	123.751	88.0336	95.2837	111.076	140.845	103.754	153.459
Nme1	944.115	960.819	809.145	803.01	633.834	753.041	671.475	703.946	626.444	563.172	532.394	494.146	519.648	465.34	454.584	542.118
Nme2	3526.11	3850.49	3101.72	3319.03	2593.82	2831.63	3240.2	2802.38	2856.21	2605.06	2456.56	2402.04	2703.88	2786.51	2580.66	2780.77
Nnt	2145.05	2303.7	2353.07	2433.57	1040.52	918.822	888.717	901.445	753.594	847.38	695.885	847.582	640.822	1185.44	933.787	797.369
Npc2	2372.3	2242.94	2235.86	2089.97	2350.36	2556.97	2338.31	2141.46	3743.16	3786.99	3946.84	3918.82	6190.72	5837.46	5419.83	5400.36
Npm1	7362.62	8835.83	8228.83	7715.44	4352.51	3677.4	4059.13	4134.8	2401.89	2436.22	3309.64	3021.38	2907.39	3572.21	3090.64	3222.63
Nptn	2444.35	2702.24	2650.52	2433.57	3279.34	2965.1	3095.37	3172.69	4237.8	4305.07	5458.08	5287.14	6061.01	5887.86	5418.96	5637.88
Nras	1432.8	1321.26	1531.33	1451.21	1171.1	1065.64	1105.96	1011.48	890.047	812.771	1115.09	972.78	603.537	588.924	594.388	527.466
Nsdhl	936.725	990.684	1203.63	1073.62	3668.35	3454.01	3952.49	3920.37	5838.03	5690.45	7870.62	7062.07	4022.03	2355.01	2423.27	2076.71
Nsf	921.944	910.358	931.399	913.141	916.747	867.543	797.871	840.785	696.221	748.798	811.167	805.48	651.696	592.376	701.659	660.104
Nxn	1001.39	1051.44	887.287	1045.93	658.317	720.728	713.607	783.651	817.169	828.502	670.732	720.167	911.909	644.847	786.949	680.925
Ogn	7762.62	7104.71	7797.79	6799.79	5382.15	5460.25	5722.02	5146.99	5690.72	7787.92	7382.25	9028.68	6700.28	18035.7	14289.1	7684.51
Ola1	824.946	975.237	985.594	969.15	655.597	638.539	672.792	656.687	507.048	453.054	586.891	550.651	517.318	570.283	572.406	542.118
Opa1	557.047	544.773	584.803	574.568	761.689	689.117	655.676	689.839	759.796	662.802	926.449	724.599	546.834	636.563	553.062	559.084
Osbpl1a	1239.73	1224.45	1284.3	1153.54	2229.3	2131.98	2159.25	2131.59	2383.28	2245.35	2622.14	2512.83	1646.72	1296.6	1281.1	1274.71
Ostf1	521.019	473.716	494.057	490.239	942.59	991.176	972.981	945.883	1314.91	1292.04	1657.97	1408.2	1336.02	1347	1144.81	1265.46
Otub1	1065.13	1023.64	981.813	1010.06	765.77	831.717	825.52	855.597	781.505	808.576	706.365	673.634	643.152	601.351	657.696	621.547
Oxct1	1890.08	1999.9	2083.36	1845.79	1838.94	1689.43	1770.85	1615.27	1445.16	1474.52	1930.45	1884.62	1706.53	2312.89	1962.54	1687.28
Oxsr1	2243.89	2132.75	2368.2	2133.39	2101.45	1952.15	2030.23	1892.47	1831.26	1935.97	2349.66	2146.1	2033.54	2015.32	1942.31	2124.52
P2rx7	2494.24	2118.33	2058.15	2408.4	3824.77	3925.37	3806.34	3776.48	1804.9	1844.73	1953.51	1671.9	1278.54	719.412	840.584	714.085
P4hb	16164.5	15909.6	14748.6	15111.2	10269.2	10905	10597.5	10358.2	9446.28	9478.49	8377.86	9634.73	7410.23	7925.96	7608.34	7717.67
Pa2g4	2583.85	2743.43	2656.82	2536.78	1735.56	1714.01	1818.25	1826.17	1193.97	1166.2	1230.37	1257.52	1012.11	914.109	1009.4	882.195
Pabpc1	11711.8	11868.6	11529.7	10726.1	6909.61	6311.64	6205.22	6540.06	5760.5	5950.53	6191.7	6721.93	5511.07	6132.96	5304.65	4805.03
Pacsin1	11.0855	6.1789	12.6035	11.3277	0	5.61971	3.94985	2.11607	0	2.09747	0	1.10795	4.66052	0.690415	7.03418	1.5423
Pacsin2	1892.85	2014.32	1900.61	1925.71	1584.59	1394.39	1603.64	1583.53	1803.35	1824.8	2049.93	1934.48	2160.15	1951.11	1848.23	2330.41
Pafah1b1	7138.14	7728.78	8325.88	7069.13	8850.56	7875.32	7978.71	7319.48	7317.3	7366.33	10960.2	8955.56	8260	7281.12	6748.42	6800
Pafah1b2	1828.18	1946.35	2012.78	1865.3	1428.17	1319.23	1300.82	1288.69	997.039	993.154	1454.65	1229.82	1363.98	1318.69	1220.43	1344.11
Paics	1200.01	1359.36	1274.21	1226.54	918.107	768.495	878.184	757.553	803.213	743.555	941.121	982.752	1261.45	1206.85	1151.85	1100.43
Park7	1017.1	1077.19	846.956	1037.75	1016.04	1208.24	1130.98	1132.1	1341.27	1164.1	1150.72	1218.74	951.523	1063.24	1036.66	1068.81
Parva	5619.43	5345.78	5764.84	5052.17	5911.25	5526.98	5882.65	5459.46	5577.52	5600.26	5770.39	5536.43	5950.71	5228.51	4501.87	4870.58
Pc	703.006	705.425	675.548	680.293	757.609	588.665	629.344	980.445	885.395	864.159	758.766	634.855	1170.57	1670.8	1909.78	1849.99
Pcbp2	2733.5	2823.76	2687.07	2658.87	1866.14	1886.82	1681.32	1936.91	1776.99	1803.83	1794.21	1766.07	2122.09	1948.35	1945.83	2096.76
Pcmt1	551.504	516.968	504.14	525.481	447.492	447.469	423.951	447.196	544.262	556.879	744.094	590.537	798.503	655.894	681.436	645.452
Pcolce	5604.65	5017.27	4115.05	5090.56	4794.56	5904.91	5425.78	5010.85	9109.8	9454.36	6181.22	7586.13	5720.79	7720.22	6655.21	3400.77
Pcyox1	1323.79	1362.45	1588.04	1470.72	1629.47	1646.57	1448.28	1461.5	1358.33	1288.9	1381.29	1479.11	1266.11	1226.18	1068.32	977.818
Pdcd6ip	2301.17	2341.8	2484.15	2302.68	2517.65	2461.43	2329.1	2508.25	3259.37	2965.83	3431.21	3226.35	3080.6	2773.4	2678.26	2999
Pdha1	2887.77	3128.58	3308.42	3034.57	2438.77	2146.73	2276.43	2295.93	2510.43	2545.28	3374.62	2972.63	3237.51	4269.53	3620.84	3514.9
Pdhb	759.357	948.461	835.613	897.408	1153.42	1095.84	1070.41	1198.4	959.824	999.446	1167.49	1065.85	1014.44	1168.87	1071.83	975.504
Pdia3	13790.4	15391.6	15088.9	13655	10165.8	9734.74	9321.66	9166.81	8120.52	8161.27	10440.4	9242.52	7916.67	7939.77	8418.15	9840.64
Pdia4	5120.58	5256.19	5234.24	5068.53	2249.7	2239.45	2061.82	2076.57	2122.78	2143.62	2144.25	2055.25	1923.24	2091.27	2250.94	3064.55
Pdia6	9382.03	9760.6	8985.04	9130.15	4702.07	4991	4546.28	4818.29	4840.99	4756.02	4231.9	4601.32	4372.35	3916.72	4293.49	5527.6
Pdlim5	145.959	167.86	192.834	259.909	140.096	118.716	115.862	131.902	231.04	213.942	186.547	159.545	140.592	280.999	229.49	205.897
Pebp1	2534.89	2534.38	2040.51	2244.78	2120.49	2535.89	2897.88	2597.12	3681.13	3056.02	2624.24	2845.22	4560.32	3438.96	3377.28	3555.77
Pfkl	419.402	393.39	297.443	419.755	284.273	347.72	408.152	416.16	387.651	382.789	308.118	339.033	410.126	416.32	429.085	464.232
Pfkm	1277.6	1439.68	1111.63	1563.23	1823.97	1900.16	1853.8	1815.59	4099.8	4077.49	3412.35	3995.27	4618.58	5788.44	5174.52	2903.38
Pfkp	108.084	100.922	114.692	149.778	61.2072	68.8414	77.6805	64.8928	125.599	120.605	85.9376	100.823	194.965	276.166	254.989	216.693
Pfn1	7063.31	7175.76	5589.66	6857.68	3502.41	4337.01	3891.92	4148.91	3668.73	3835.23	2695.51	3235.21	3667.05	3666.1	3512.69	3859.6
Pgam1	4771.39	4952.39	4339.39	4320.27	1974.95	2004.13	1964.39	2042.71	2322.81	2414.19	2391.58	2443.03	3020.79	2850.03	2965.79	3255.79
Pgam2	21.2472	459.298	17.6449	534.921	118.334	93.4277	67.1475	78.2946	131.801	206.601	60.7851	90.8519	123.504	2255.59	1666.22	129.553
Pgk1	3615.72	3976.12	3644.93	3772.13	1817.17	1767.4	1806.4	1786.67	1995.63	2016.72	1752.29	2065.22	2675.14	3637.11	3391.35	2557.9
Pgls	250.348	255.395	163.846	190.054	254.35	285.2	337.054	309.651	285.311	237.015	173.971	200.539	232.249	215.409	196.078	255.251
Pgrmc1	2597.7	2713.57	2801.76	2316.52	2676.79	2517.63	2481.83	2314.98	2600.36	2693.16	2978.47	3205.3	3443.35	3096.51	2988.65	2732.18
Phb	485.915	541.684	448.685	533.662	458.374	585.855	560.879	582.624	617.141	615.609	603.659	510.765	610.528	631.039	658.575	673.214
Phb2	1735.81	1801.15	1580.48	1685.31	1415.93	1424.6	1350.85	1434.69	1131.94	1027.76	1351.94	1032.61	908.025	1014.22	1026.99	963.937
Phgdh	2229.11	2328.42	1842.63	1921.94	1249.99	1343.81	1569.41	1393.78	1411.05	1296.24	1123.48	1055.88	1880.52	1143.33	1344.41	1499.12
Picalm	4625.43	5093.47	5209.03	4605.35	4576.94	3914.83	4117.07	4033.93	4549.47	4261.02	6223.14	5319.27	5570.88	6104.65	5817.27	5869.22
Pitpna	1510.4	1508.68	1531.33	1533.02	1247.27	1343.11	1234.99	1288.69	1445.16	1461.94	1559.45	1627.58	1672.35	1554.81	1584.45	1618.64
Pitpnb	1074.37	1260.5	1347.31	1159.83	1070.45	967.292	1048.03	1017.83	1003.24	1014.13	1024.96	1074.71	1050.17	982.46	987.423	996.325
Pkm	2312.25	2350.04	2108.57	2541.82	1343.84	1425.3	1257.37	1330.3	2056.1	2262.13	1463.03	2016.47	2456.09	4406.23	4448.24	2220.91
Plcd1	1084.53	1067.92	846.956	947.754	824.256	912.5	941.382	994.552	759.796	764.529	521.914	608.265	731.702	646.919	721.003	660.104
Plec	4033.28	3903.01	3290.78	4048.41	5240.69	6563.12	7702.22	6829.26	10266.6	8942.58	7011.25	7018.86	9030.54	7243.83	7187.17	7517.17
Plekhb1	6591.26	6112.99	5156.09	5166.7	16034.9	16986.3	15522.9	15486.8	22552	21207.6	23056.4	22427.1	29257.2	18380.9	20598.7	19097.5
Plg	26.79	24.7156	37.8105	21.3968	103.372	61.8168	68.4642	69.1249	43.4169	62.9242	62.8811	33.2385	47.382	28.9974	29.8953	16.9653
Plin1	0.923792	18.5367	0	3.77591	408.048	210.739	281.756	1052.39	1212.57	1176.68	1100.42	500.793	1104.54	4694.82	4037.62	4956.18
Plin3	333.489	330.571	269.715	379.479	367.243	413.049	406.835	409.107	652.804	768.724	412.92	575.026	911.909	805.024	873.997	829.757
Pllp	168.13	139.025	134.858	130.898	4556.53	5517.85	5216.44	5112.42	9561.03	8624.81	7637.96	8147.86	9851.56	5954.14	6100.39	5958.67
Plp1	7321.98	7526.93	7806.61	5839.45	44499	39585.2	41153.5	37362.7	32886.8	29806.2	46366.5	35113.2	38102.9	22285.2	24009.4	21505.8
Pls3	1707.17	1535.46	2050.59	1689.72	1184.7	964.483	1069.09	1040.4	1471.52	1485.01	2056.21	1824.79	2812.62	2934.95	3257.7	3137.81
Pmp2	2340.89	2379.91	2450.12	1906.21	33057.3	30544.5	33392.1	29493.1	65402.9	74811.7	105232	79026.7	76624.4	43393.3	42476.8	23926.5
Pmp22	23333.1	22072.1	21327.7	20922.3	384815	397304	378188	372071	745017	753493	793153	776590	550891	331155	347870	304998
Por	665.13	637.457	563.377	604.775	911.307	975.722	1088.84	1117.28	1750.63	1640.22	1106.71	1427.04	1399.71	1403.61	1427.94	1219.96
Postn	33428.3	42111.3	42531.8	36431.2	22769.1	22662.2	21216	21219.9	12389.3	12839.7	14785.5	12833.4	322.353	5240.94	2638.7	7152.41
Ppa2	597.693	577.727	539.43	534.921	1013.32	891.426	955.865	979.74	961.375	819.064	964.178	1004.91	668.785	579.948	582.078	562.168
Ppia	193.996	148.294	115.952	216.486	40.8048	89.2129	98.7464	71.9463	155.06	68.1679	27.2485	67.5849	149.913	116.68	72.9796	103.334
Ppib	6912.74	6848.28	6265.2	6352.97	4136.24	4499.28	4638.45	4293.5	3935.43	3861.45	3607.28	3439.08	3172.26	3686.12	3390.47	3571.19
Ppic	3711.8	3817.53	3626.03	3484.54	2385.72	2252.1	2230.35	2201.42	1521.14	1652.81	1272.3	1513.46	867.634	1425.02	975.992	869.857
Ppid	540.418	632.308	683.11	577.714	349.561	338.587	317.305	292.018	338.032	263.233	207.508	407.726	261.766	336.232	352.588	391.744
Ppp1ca	4592.17	4571.36	4138.99	4521.02	3491.53	3545.33	3748.41	3687.6	2876.37	2806.42	2366.43	2676.81	2391.62	2566.27	2546.37	2597.23
Ppp1cb	6395.41	6997.61	6876.47	6020.69	5455.6	4547.75	5304.66	4658.88	4702.98	4570.4	7363.38	5803.44	6910.78	7270.07	6580.47	6098.25
Ppp1cc	4885.94	5168.65	4828.4	4824.98	4202.89	4349.65	4186.85	4323.83	3611.36	3775.45	4047.45	3854.56	3371.11	3160.72	3014.15	3131.64
Ppp2r1a	3182.46	3137.85	2939.14	3055.34	2600.62	2677.09	2630.6	2577.37	2739.92	2853.61	2085.56	2440.81	2630.86	2294.25	2625.51	2533.23
Ppp2r1b	901.621	944.342	898.63	887.339	573.987	592.879	530.597	610.839	387.651	370.204	494.665	385.567	391.484	674.535	668.247	761.896
Ppp2r2a	1386.61	1437.62	1411.59	1430.44	1283.99	1230.72	1142.82	1229.44	1062.16	983.715	1081.56	1173.32	1308.83	1244.13	1318.91	1245.41
Ppp3ca	868.365	947.432	1092.72	928.874	1054.12	926.55	969.031	993.847	792.359	822.21	1251.33	922.922	1036.19	952.773	841.464	764.209
Prdx1	1421.72	1668.3	1557.79	1441.77	1082.69	1119.02	1015.11	1184.29	1203.27	1058.18	1649.58	1327.32	1683.22	1621.78	1481.57	1448.99
Prdx2	5648.06	5092.44	3462.18	3799.82	2096.01	2443.17	2343.58	2409.5	2327.46	2348.12	2288.87	2174.91	1915.47	1719.13	1791.96	1777.5
Prdx3	901.621	1127.65	967.949	1011.31	603.911	583.747	562.196	617.187	596.983	529.612	674.924	614.912	584.895	1019.05	975.113	916.897
Prdx4	2213.41	2314	2074.54	1984.87	1263.59	1350.84	1371.92	1271.05	1150.55	1215.49	1249.24	1228.72	1017.55	1485.08	1194.05	727.194
Prdx5	385.221	377.943	315.088	372.557	432.531	524.74	564.829	574.865	728.784	690.069	500.953	623.776	850.545	895.468	807.172	820.503
Prelp	1298.85	1314.05	1154.48	1269.34	1569.62	1865.74	1590.47	1716.84	7208.76	7416.67	5887.77	7201.67	5522.72	9557.41	9668.48	5846.09
Prkaca	1641.58	2011.23	1523.76	2305.82	916.747	944.814	934.799	964.928	908.654	849.477	892.912	866.417	942.202	904.443	895.978	909.186
Prkacb	133.95	166.83	161.325	140.967	182.261	174.211	177.743	140.366	209.332	190.87	270.389	168.408	159.234	137.393	133.649	95.6226
Prkca	220.786	238.918	223.082	217.744	405.327	459.411	402.885	247.58	860.585	706.849	1226.18	784.429	1047.06	735.292	708.693	984.758
Prkcd	1082.68	1061.74	949.044	1040.89	1165.66	1199.11	1153.36	1031.94	1063.71	1190.32	1431.59	1246.44	1169.79	917.561	882.789	1072.67
Prnp	7238.83	7051.16	6354.69	6011.88	6663.42	6454.24	6680.52	6174.69	7771.63	7618.03	8889.3	8267.52	14199.8	10045.5	10240.9	9372.55
Prph	181.987	146.234	118.473	151.036	69.3681	73.7587	100.063	71.241	105.441	72.3629	35.6326	32.1305	316.915	163.628	203.112	338.535
Prps1	608.779	776.482	729.743	637.5	488.297	462.221	483.199	509.973	427.967	396.423	693.789	458.691	473.043	540.595	574.165	444.182
Prx	2560.75	2621.91	2065.71	2192.55	87635.1	97257.5	105203	97297.6	151686	136804	115829	127397	104018	61187.3	70029.6	57922.6
Psma1	1417.1	1562.23	1506.12	1477.64	1316.63	1133.07	1269.22	1213.92	900.901	954.351	1175.88	1025.96	1108.43	1106.74	1064.8	1095.03
Psma2	1207.4	1337.73	1225.06	1229.69	1303.03	1130.26	1178.37	1260.47	1090.07	1098.03	1467.23	1259.74	1381.07	1327.67	1249.45	1292.45
Psma3	1681.3	1939.15	1896.83	1662.03	1923.27	1831.32	1897.25	1962.3	1564.56	1610.86	2150.54	1874.65	1769.44	1572.77	1512.35	1578.54
Psma4	1818.02	1821.75	1909.43	1854.6	1788.61	1553.85	1644.46	1685.8	1569.21	1617.15	1919.97	1774.94	1541.08	1465.75	1599.4	1415.83
Psma5	1298.85	1360.39	1174.65	1259.27	1069.09	1017.17	1075.68	1048.86	860.585	952.253	920.161	914.059	1035.41	1008.7	1026.11	957.768
Psma6	1631.42	1712.59	1632.15	1594.06	1288.07	1286.21	1269.22	1278.81	1147.45	1138.93	1127.67	1236.47	1622.64	1694.28	1592.36	1662.6
Psma7	1762.6	1883.54	1609.47	1694.75	1682.52	1867.85	1945.96	1956.66	1417.25	1588.84	1245.05	1479.11	1324.36	1343.55	1327.7	1344.89
Psmb1	2040.66	1994.76	1924.56	2013.82	1840.3	1912.81	2002.58	1995.45	1775.44	1745.1	1664.25	1653.06	1917.8	1940.76	1976.6	1915.54
Psmb2	1064.21	1122.5	971.73	1049.7	869.142	920.93	886.084	916.258	714.829	713.141	653.964	723.491	754.228	740.125	777.277	761.896
Psmb3	759.357	769.273	628.915	712.388	745.367	707.381	757.056	751.205	685.367	681.679	618.331	593.861	791.512	719.412	747.381	791.971
Psmb4	1750.59	1683.75	1532.59	1603.5	1596.83	1683.81	1664.21	1740.11	1460.67	1578.35	1201.03	1393.8	1748.47	1679.78	1662.7	1651.8
Psmb6	124.712	181.248	73.1003	133.416	213.545	152.435	289.656	203.143	189.174	214.991	155.107	120.767	177.1	189.864	225.094	230.574
Psmc3	1706.24	1778.49	1528.81	1563.23	1870.22	2076.48	2107.91	2018.02	2215.81	2197.1	1980.76	1990.99	2164.04	1815.1	1972.21	1858.47
Psmc6	1146.43	1400.55	1387.65	1113.89	1331.6	1076.88	1163.89	1159.61	1017.2	980.569	1509.15	1267.49	1541.08	1445.04	1418.27	1453.62
Psmd1	1806.01	2011.23	2174.11	1998.72	1871.58	1741.41	1816.93	1802.19	1545.95	1685.32	1790.02	1722.86	1911.59	1726.04	1736.56	1584.71
Psmd13	1280.38	1403.64	1240.19	1390.16	1285.35	1260.22	1220.51	1328.89	1187.76	1143.12	928.545	1025.96	1110.76	1046.67	1107	1065.73
Psmd5	855.431	876.374	883.506	853.356	625.673	600.606	593.795	598.142	474.485	542.197	626.715	577.242	594.993	561.998	558.338	623.86
Psmd7	1474.37	1509.71	1411.59	1489.6	1254.07	1251.79	1206.02	1296.44	1130.39	1211.29	1163.3	1193.26	1238.14	1251.03	1233.62	1223.04
Psmf1	316.861	333.661	269.715	309.625	1146.61	1270.05	1130.98	1257.65	2054.55	1984.21	1507.05	1870.22	2088.69	1418.11	1660.95	1447.45
Ptges3	5198.18	6395.16	5914.83	5098.11	3601.7	3158.98	3461.39	3191.03	2636.03	2537.94	4347.18	3444.62	4349.82	4308.88	4033.22	4923.79
Ptpa	2659.6	2618.82	2291.32	2599.09	1844.38	2124.25	2200.07	2017.32	2212.71	2294.64	1882.24	1922.29	2204.43	1881.38	2085.63	2082.1
Ptpn11	3231.42	3277.91	3439.5	3249.17	3107.96	3032.54	2845.21	2874.33	2998.87	3034	2919.78	2946.04	3173.04	3247.71	3061.63	3060.69
Pura	38.7993	30.8945	39.0709	30.2073	58.4868	45.6601	63.1977	67.0089	74.429	60.8267	39.8247	52.0736	59.81	45.5674	50.9978	39.3286
Purb	367.669	407.807	386.928	353.048	367.243	385.653	358.12	333.634	333.38	267.428	488.377	312.442	411.679	388.704	347.313	355.5
Pxn	2442.51	2498.34	2164.02	2588.39	2612.87	3069.77	2953.17	3009.76	3842.4	4071.2	2898.82	3582	2846.02	2927.36	2592.09	2890.27
Pygb	547.809	494.312	572.199	554.43	486.937	564.781	589.845	560.758	686.918	611.414	658.156	715.736	574.798	472.934	552.183	449.58
Pygm	30.4851	811.496	44.1123	1186.89	112.893	96.94	48.7149	76.1785	142.656	439.421	108.994	117.443	150.69	9743.13	7299.72	498.163
Rab10	3418.95	3826.8	3871.8	3443.63	3513.29	3232.74	3394.24	3440.73	3405.13	2879.83	4516.96	3638.51	4339.72	4200.48	3925.07	3665.27
Rab11b	1473.45	1388.19	1241.45	1404.64	1420.01	1577.73	1727.4	1778.91	2008.03	1862.56	1559.45	1694.06	2054.51	1999.44	1995.07	2083.65
Rab12	248.5	214.202	257.112	211.451	250.269	214.954	230.408	220.071	303.918	244.356	297.637	264.8	284.292	283.761	314.779	295.35
Rab14	3322.88	3742.35	3962.54	3289.45	3490.17	3148.44	3407.41	3325.76	2885.67	2789.64	4013.91	3515.53	3674.04	3539.76	3318.37	3632.89
Rab18	2016.64	2088.47	2156.46	1931.38	1924.63	1580.54	1806.4	1771.15	1814.21	1770.27	2536.21	2294.56	2642.52	2716.78	2597.37	2318.85
Rab21	509.009	592.145	535.649	458.144	647.436	557.756	637.243	606.606	804.764	734.116	1004	865.309	1055.61	1011.46	860.808	882.966
Rab22a	1084.53	1107.05	1052.39	1109.49	1077.25	1172.41	1121.76	1082.02	1133.49	1168.29	1119.28	1105.73	939.095	889.945	857.291	951.599
Rab2a	1050.35	1116.32	1067.52	1051.59	1564.18	1261.62	1524.64	1322.54	1563.01	1409.5	2112.81	1807.07	2155.49	1732.25	1687.32	1573.15
Rab2b	305.775	233.768	305.005	292.004	326.438	316.109	298.872	308.241	359.74	388.033	356.326	381.135	431.098	350.04	387.759	345.475
Rab35	1066.98	970.087	1007.02	1084.32	882.743	942.706	917.683	995.258	990.836	978.472	941.121	878.604	1080.46	997.649	924.994	1077.3
Rab39a	74.8272	68.9977	88.2246	59.1559	46.2454	42.8503	50.0315	34.5625	66.676	47.1932	44.0168	68.6929	65.2473	74.5648	69.4625	96.3937
Rab3a	68.3606	72.0872	56.7158	67.9664	80.2494	107.477	102.696	126.259	176.769	145.774	165.587	146.249	201.956	135.321	130.132	104.105
Rab43	42.4944	23.6858	46.633	33.3539	58.4868	62.5193	97.4298	76.1785	96.1375	92.2889	134.146	74.2326	84.6661	91.8252	83.5309	89.4534
Rab4b	260.509	232.739	214.26	248.581	326.438	425.693	448.967	426.035	600.084	523.32	450.648	428.777	497.899	376.276	393.035	394.829
Rab5b	3804.18	3946.26	4075.97	3927.58	3777.16	3758.18	3506.15	3703.83	4451.79	4695.2	5189.79	5112.08	5452.03	4924.04	5128.8	5029.44
Rab5c	1878.07	1873.24	1623.33	1703.57	1890.62	2102.47	2261.95	2218.35	2431.35	2276.81	1821.46	2102.89	2956.32	2625.65	2774.98	2945.02
Rab6a	4922.89	5304.59	5295.99	4723.66	5327.74	4604.65	4974.18	4744.93	4682.83	4588.22	7757.44	5953.02	6554.25	5380.4	5141.11	5123.52
Rab6b	426.792	381.032	428.519	395.841	212.185	234.623	219.875	201.027	248.097	291.549	312.31	218.266	539.844	328.637	349.95	333.908
Rab7a	4041.59	4171.79	3836.51	4066.03	4500.77	4535.11	4454.12	4323.83	5433.32	5397.85	5764.11	5741.4	6979.91	6643.17	6240.2	6583.31
Rab8a	1264.67	1185.32	1114.15	1110.75	833.778	911.095	1058.56	1014.3	919.508	948.058	823.743	827.639	1026.09	954.844	958.407	1068.81
Rab8b	2331.65	2535.41	2641.7	2197.58	2925.7	2680.6	2618.75	2463.1	2494.92	2337.63	3552.78	2962.66	2355.89	2261.11	2074.2	2215.51
Rac1	7595.42	7786.45	7586.05	7016.27	5783.4	5859.95	5627.23	5838.94	6458.27	6415.12	6080.61	6809.46	8542.73	7098.16	7219.7	7506.37
Rack1	9355.24	9293.07	8425.44	9072.25	6409.07	6683.24	6486.98	6447.66	5492.24	5835.17	4433.12	5321.48	6055.57	7216.91	6934.82	6819.28
Rala	718.71	867.106	877.204	806.157	911.307	769.9	896.617	715.231	738.088	693.215	1085.75	926.246	1033.08	984.532	852.894	947.743
Ralb	980.143	968.028	950.304	889.227	568.547	586.557	559.563	605.196	533.408	506.54	721.037	450.936	531.299	666.25	653.299	713.313
Ran	4587.55	5073.91	4272.59	4507.18	2089.2	2033.63	2069.72	2117.48	1195.52	1177.73	1154.92	1201.02	1293.29	1355.28	1296.93	1540.76
Rap1a	5778.32	6289.09	5898.44	5051.54	3798.92	3464.55	3762.9	3574.04	3304.34	3221.72	4649.01	4039.59	4602.26	4016.83	3885.5	4127.19
Rap1b	1042.96	1067.92	1003.24	1105.71	807.935	760.066	708.341	771.66	779.954	902.963	1196.84	948.405	986.477	1088.78	910.926	1033.34
Rap2a	3697.02	3516.82	3700.39	3464.4	4283.14	4158.58	4267.16	4148.91	2910.48	2889.27	3066.5	2860.73	2264.24	1617.64	1727.77	1601.68
Rap2b	55.4275	50.461	34.0295	40.2764	53.0462	41.4454	44.765	49.3749	41.8663	51.3881	23.0564	23.2669	27.1864	36.592	29.016	36.244
Rars	1015.25	1109.11	1124.23	1032.71	922.188	830.312	833.419	866.883	623.343	656.509	830.031	693.577	686.65	694.557	678.798	707.915
Rcn1	4855.45	4868.97	5130.89	4648.15	5247.49	4821.01	4961.02	4833.81	6228.78	5903.34	6986.1	7057.64	5888.57	4411.06	4165.11	4028.49
Rcn3	4387.09	4216.07	3234.06	3770.25	3475.21	4101.69	4019.64	3923.9	4223.85	4194.95	2856.9	3388.11	2738.83	2613.22	2789.93	2086.73
Rdh11	645.731	613.771	673.027	609.18	805.214	777.627	743.889	735.687	1135.04	1104.32	1167.49	1224.28	995.021	829.879	806.293	925.38
Rdx	751.967	778.542	941.482	821.261	889.544	916.715	969.031	849.249	555.116	565.269	871.952	611.588	617.519	619.302	524.926	488.909
Reep5	2614.33	2982.35	2679.51	2724.95	2686.31	2849.89	2713.55	2776.99	3752.46	3536.34	3825.27	3504.45	3733.08	3964.36	3999.81	4782.67
Rer1	1395.85	1380.98	1358.66	1213.33	1770.93	1690.83	1765.59	1684.39	1809.56	1791.24	2360.14	1918.97	1922.46	1616.26	1586.21	1627.13
Rhoa	12559.9	12759.4	12428.3	11697.8	9519.75	9243.02	9532.32	9448.95	10716.2	10508.3	11157.2	11244.6	12550	12158.9	11874.6	14192.2
Rhob	3488.24	3597.15	3424.37	3242.88	2300.03	2497.26	2745.15	2602.06	3437.69	3459.78	3527.63	3562.06	3242.95	4522.22	3963.76	4955.41
Rhoc	2751.98	2627.06	2278.71	2510.35	1424.09	1565.79	1394.3	1595.52	1507.19	1556.33	1247.14	1428.15	1475.05	1479.56	1500.92	1784.44
Rhog	872.983	887.702	787.719	854.614	573.987	779.735	725.457	782.24	722.582	830.6	723.133	700.224	1051.72	906.515	866.083	976.276
Rhot2	709.472	675.56	564.637	697.285	538.623	662.423	606.961	668.678	643.501	595.683	427.592	521.844	610.528	566.14	613.732	692.492
Rida	76.6747	83.4152	73.1003	91.2512	148.257	140.493	155.361	143.893	235.692	224.43	249.429	222.698	365.074	345.207	355.226	328.51
Rpl10	7977.87	7818.37	7434.81	7763.27	5730.35	5464.46	5269.11	5247.85	4675.07	5027.65	4527.44	5288.25	5932.84	7377.77	7183.65	7197.91
Rpl10a	446.192	494.312	360.46	482.687	122.414	214.251	171.16	232.062	283.761	220.235	6.28811	154.005	127.388	245.097	201.353	146.518
Rpl11	6288.25	6260.26	5874.49	5888.53	4861.21	4593.41	4695.06	4509.34	4005.21	4301.92	4097.75	4242.34	4639.55	5675.9	5623.83	5361.03
Rpl12	50.8086	96.8028	56.7158	75.5182	80.2494	66.734	294.923	144.598	162.813	66.0704	8.38415	79.7724	55.9262	100.801	71.2211	1095.8
Rpl13	15.7045	6.1789	6.30175	34.6125	42.1649	26.6936	43.4484	40.2053	13.9554	7.34116	0	12.1874	12.4281	8.97539	12.3098	5.39805
Rpl13a	5098.41	5012.12	4314.18	4985.46	3900.94	4418.5	4315.87	4433.16	4278.12	4201.24	3798.02	3757.06	5088.51	5463.25	5046.14	5522.2
Rpl14	4453.6	4726.86	4428.87	4312.09	3877.81	3553.06	4516	3785.65	3448.54	3321.35	3798.02	3305.01	3528.79	4424.87	4069.27	4226.67
Rpl15	2985.7	2885.55	2250.99	2813.05	2208.9	2645.48	2879.44	2937.1	2566.25	2163.54	1875.95	1885.73	2528.33	2796.87	2441.74	2654.3
Rpl17	4559.84	4853.53	5550.58	5946.43	3113.4	2469.86	3697.06	4672.99	2916.69	2158.3	1592.99	2029.76	3695.79	4333.73	2592.09	4043.14
Rpl18	3355.21	3592	3003.42	3315.25	2884.9	3034.64	3238.88	3100.04	2623.62	2604.01	1917.87	2214.79	2645.62	3167.62	3118.78	3108.5
Rpl19	6169.08	6301.45	5520.34	6054.04	5578.01	5640.78	5820.77	5769.82	5005.35	5419.87	4542.11	4961.4	6102.95	7234.17	7116.83	7204.08
Rpl21	9530.76	9634.97	9426.16	9454.88	8280.65	7435.58	8369.74	7687.68	6476.87	6693.04	8392.54	8078.06	8333.01	10559.9	9816.2	9524.47
Rpl22	1127.03	1073.07	959.127	1018.87	741.287	802.916	797.871	798.463	728.784	827.454	695.885	737.895	833.456	933.441	899.496	892.22
Rpl23	5053.14	5208.81	4639.35	4903.02	3860.13	3480.71	3597	3665.03	2908.93	3327.64	4072.6	3363.74	3837.16	4879.85	4435.93	4508.14
Rpl23a	2255.9	2429.34	1980.01	2329.74	1647.15	1932.48	1493.05	1735.18	1423.45	1576.25	1496.57	1517.89	2028.1	2279.06	2069.81	2290.31
Rpl24	3655.45	3689.83	3171.04	3488.94	2816.89	3123.86	2687.22	2927.93	2420.49	2688.96	2075.08	2454.11	3086.82	3640.56	3248.91	3305.15
Rpl26	2933.96	2769.18	2989.55	2894.86	2903.94	2653.91	2963.71	2584.43	2293.34	2229.61	1678.93	2742.18	2963.31	4168.72	3771.2	3416.96
Rpl27	3125.19	3103.87	2815.62	2981.71	2193.94	2289.33	2205.34	2288.18	1956.86	1970.58	1685.21	1999.85	2232.39	2622.89	2719.59	2345.84
Rpl27a	1574.14	1688.9	1333.45	1499.04	1154.78	1169.6	1212.61	1113.76	846.63	859.964	735.709	957.269	1377.18	1454.7	1412.99	1415.83
Rpl28	1812.48	1821.75	1464.53	1617.98	1338.4	1322.74	1249.47	1257.65	1273.05	1250.09	1027.06	1138.97	1447.09	1462.99	1584.45	1563.89
Rpl29	3279.46	3310.86	2307.7	2960.94	2610.15	3321.25	3699.7	3785.65	2981.81	2516.97	2228.09	1972.15	3061.19	3360.25	3248.03	3635.2
Rpl3	13790.4	13892.2	14032.7	13876.5	10726.2	10637.4	10031.3	10411.1	9337.74	9657.82	8526.68	9638.06	11037.7	12017.4	11647.7	10284.1
Rpl30	5064.23	5128.49	4999.81	5269.28	5043.47	4719.15	4834.62	4791.49	4682.83	5123.08	4929.88	5649.44	5465.24	7305.28	6597.18	6548.6
Rpl31	1351.51	1419.09	1378.82	1401.49	817.456	904.071	767.588	800.579	514.801	623.999	725.229	578.35	563.923	826.427	626.042	849.807
Rpl32	9698.89	9792.53	8692.64	9280.56	7414.23	7706.73	6917.51	7520.51	6385.39	6501.12	5648.82	6204.52	8076.68	8875.97	8533.34	8399.36
Rpl35	3636.05	3486.96	2461.46	3072.96	2206.18	2888.53	2491.04	2930.05	2581.76	2666.94	1645.39	2072.97	2974.19	3360.94	2885.77	3335.22
Rpl36	53.5799	16.4771	1.26035	22.0261	23.1227	66.0316	13.1662	24.6875	10.8542	35.6571	4.19208	5.53975	38.0609	30.3783	85.2894	73.2592
Rpl4	13508.6	14120.8	13429	13310.7	9997.17	10216.6	9746.93	9909.55	9140.81	9371.51	9505.53	9874.05	10861.3	12613.9	12183.2	11250.3
Rpl5	8929.37	9250.84	8585.51	9276.15	7102.75	7098.4	6677.89	6963.28	6152.8	6770.65	6164.45	6736.34	7887.93	9908.14	8715.35	8879.79
Rpl6	1272.06	1257.41	1130.53	1292.62	1029.64	1138.69	1274.49	1519.34	1062.16	858.916	1012.39	807.696	988.807	1402.92	1232.74	1054.16
Rpl7	10894.3	11032.4	10550.4	10599	8758.07	7972.96	7824.66	7993.1	6717.22	7151.34	6870.81	7505.25	8467.39	10318.3	9972.71	9781.26
Rpl7a	2036.04	2048.31	1779.62	1981.72	1619.95	1675.38	1715.55	1798.66	1559.91	1716.78	1077.36	1450.31	1454.86	1747.44	1854.39	1587.03
Rpl8	25.8662	9.26835	15.1242	30.2073	10.8813	10.537	35.5487	21.1607	13.9554	20.9747	2.09604	24.3749	6.21403	6.90415	9.672	15.423
Rpl9	5121.5	5474.51	5323.72	5232.78	4005.67	3961.19	3495.62	3881.58	3050.04	3189.21	3605.19	3955.38	4763.83	5802.25	5094.5	5472.08
Rplp0	11489.2	11754.3	9166.53	10471.9	9438.14	11134.8	14099.7	11960	11144.2	9613.77	7717.61	8615.42	10389.1	12490.3	11142.1	11068.3
Rpn1	6727.98	6759.72	6398.8	6443.59	3928.14	4103.09	3959.07	3906.97	3854.8	3952.69	3919.59	3894.44	3390.53	3887.73	3880.23	4600.68
Rpn2	6513.66	6509.47	6170.68	6097.47	3573.14	3636.65	3573.3	3443.55	3467.15	3786.99	3351.57	3701.66	4381.67	4783.88	5053.18	4396.32
Rps10	701.158	636.427	545.732	621.767	131.935	201.607	144.828	186.919	136.453	206.601	111.09	126.306	174.77	162.247	170.579	215.922
Rps11	6513.66	6467.25	5841.73	6178.02	4680.31	4708.61	4272.43	4495.94	4479.7	4485.45	3521.34	4313.25	5006.95	5702.83	5640.53	6001.86
Rps14	5921.51	6010.01	4926.71	5849.52	4825.84	4794.31	4123.65	4466.32	4346.34	4590.32	3655.49	4205.78	6709.6	7651.87	7046.49	6821.59
Rps15	2946.9	2760.94	1789.7	2504.69	2180.34	2833.04	3981.45	3221.36	3186.49	2434.12	1582.51	1893.49	3103.13	3302.25	3191.76	3487.91
Rps15a	1870.68	2100.83	2012.78	1889.21	1524.74	1400.71	1469.35	1424.82	1122.64	1190.32	1387.58	1158.92	1486.71	1996.68	1658.31	1644.86
Rps16	7208.35	6478.58	6551.3	5994.26	9011.05	7492.48	8756.83	7207.33	6726.52	6893.35	6898.06	7970.59	5584.08	6627.29	6389.67	6531.64
Rps17	810.166	815.615	918.796	717.423	692.321	514.203	1141.51	738.508	379.898	552.684	350.038	575.026	276.524	499.17	564.493	565.253
Rps18	7903.96	8064.5	7489	7763.27	7974.61	7904.82	8518.52	8366.94	6641.24	7041.22	5437.12	6771.79	6605.51	7358.44	7510.74	7460.87
Rps19	242.957	189.486	138.639	166.769	172.74	166.484	138.245	234.884	130.251	157.311	0	167.3	171.663	128.417	106.392	141.892
Rps2	61.8941	97.8326	66.7986	101.95	99.2916	139.79	495.048	239.116	133.352	90.1914	16.7683	66.477	125.834	172.604	113.426	158.086
Rps20	11.0855	0	13.8639	7.55182	14.9618	0	5.26647	5.64285	6.20242	4.19495	0	4.4318	0	10.3562	0	13.1095
Rps23	5122.43	5079.06	4566.25	4857.08	3885.97	3873.38	3520.64	3711.59	3307.44	3515.37	2884.15	3492.26	4316.42	5173.28	5192.98	5058.74
Rps24	4813.88	5232.5	4407.45	4800.44	3434.4	3288.93	2961.07	3459.07	2454.61	2578.84	3370.43	2845.22	3162.94	3574.97	3465.21	3804.85
Rps25	1889.15	1884.56	1822.47	1872.85	1588.67	1659.92	1260	1491.83	1246.69	1224.92	1092.04	1230.93	2203.65	2428.19	2228.96	2049.72
Rps27a	9411.59	9449.6	8393.94	9012.47	7215.64	7015.5	6891.18	6883.57	5518.6	6171.82	6963.04	6208.95	8173	10011.7	9417.89	9440.41
Rps27l	743.653	847.539	743.607	754.553	754.888	804.321	830.786	722.99	685.367	661.753	662.348	629.316	683.543	730.459	616.37	744.931
Rps3	6496.11	6922.43	6710.11	6463.73	5197.17	4833.65	4606.85	4651.83	4110.65	4251.58	4158.54	4332.08	4923.06	6282.78	6109.18	5672.58
Rps3a	2946.9	3272.76	2622.79	2886.68	2116.41	2120.74	1791.92	2146.4	1482.38	1739.85	2093.94	1813.71	2747.38	3396.15	2848.84	3207.21
Rps4x	18948.8	19644.8	19462.3	18741.1	15247.4	14663.9	13964.1	13971.7	12372.3	13405	15265.4	15136.8	16374	20956.2	19606	18629.4
Rps5	4290.09	4369.51	3512.6	4168.61	3287.5	3603.64	3847.16	3627.65	2939.95	2970.02	1978.66	2825.27	3465.1	4067.23	4278.54	3923.61
Rps6	7908.58	8567.05	7770.06	8445.45	5693.63	6019.41	6061.71	5989.18	4833.23	5004.57	4579.84	4767.51	6095.18	7265.93	6889.1	6506.96
Rps6ka3	1648.97	1916.49	1911.95	1699.16	1557.38	1330.47	1308.72	1390.26	986.184	1018.32	1240.85	1143.4	1181.44	1649.4	1478.94	1876.98
Rps8	4432.35	4699.05	4568.77	4682.13	2917.54	3196.91	2857.06	3113.44	3017.48	2858.86	2664.06	2906.15	3382.76	3980.24	3792.3	3544.2
Rpsa	10793.6	11043.8	9102.25	9967.15	7278.21	8252.54	8518.52	8211.76	8060.04	7453.37	5801.83	6177.93	8865.09	10481.9	9512.85	10076.6
Rras	533.028	442.821	419.697	488.351	285.633	318.918	264.64	308.241	511.699	539.051	421.304	486.39	780.637	766.361	771.122	808.936
Rras2	556.123	616.86	611.27	578.344	442.052	400.404	417.368	342.098	502.396	511.784	620.427	651.475	633.831	606.184	578.561	694.035
Rrbp1	7931.68	7692.73	8785.9	7897.32	6588.61	6271.6	7374.38	6387.71	5580.63	5861.39	6038.69	5904.27	3411.5	4374.47	4048.17	4260.6
Rsu1	623.56	610.681	510.442	613.585	519.581	432.015	471.349	546.651	682.266	720.482	377.287	675.849	603.537	572.354	662.971	563.71
Rtcb	902.545	977.296	970.47	869.718	844.659	802.213	713.607	809.044	697.772	815.917	865.664	756.73	815.591	713.889	823.878	798.14
Rtkn	245.729	151.383	75.621	160.476	594.39	745.314	1008.53	651.749	950.521	692.166	270.389	546.219	1158.92	590.995	575.044	605.353
Rtn1	250.348	240.977	284.839	265.572	100.652	110.989	105.329	112.857	155.06	159.408	138.339	146.249	300.604	307.235	337.641	442.64
Rtn4	4727.04	5191.31	5220.37	5038.95	6600.85	5963.92	6564.66	6217.72	6225.68	5648.5	9572.61	7097.53	7985.03	7748.53	7534.48	7137.76
Rufy3	558.894	592.145	577.241	572.68	783.452	702.464	772.855	791.41	880.743	904.011	907.585	949.513	1109.98	997.649	1066.56	1145.93
S100a10	8913.67	8746.23	8049.86	8389.44	6149.28	6379.07	5743.09	5758.53	7249.08	7408.28	7658.92	7845.39	8023.09	7876.94	6457.38	8862.82
S100a6	2089.62	1825.87	1538.89	1716.15	8906.32	8016.52	8475.07	7208.74	13009.6	12984.4	14062.3	15156.8	18457.2	15705.6	16517.1	15676.7
S100b	3371.84	3158.45	2770.25	2910.6	11985.7	12292.4	11667.9	10517.6	30827.6	28415.5	29770	28502	66020.9	47010.3	46961.1	50840.4
Sacm1l	1155.66	1328.46	1518.72	1169.9	1622.67	1343.81	1358.75	1177.95	1704.11	1482.91	2460.75	2097.35	1921.69	1797.84	1947.59	1915.54
Samm50	785.223	715.723	732.264	721.199	682.8	723.538	850.535	785.767	708.626	687.971	708.461	627.1	542.174	675.226	720.124	618.462
Sars	1646.2	1662.12	1523.76	1524.21	1430.89	1605.83	1544.39	1640.66	1432.76	1550.03	1263.91	1363.89	1277.76	1190.97	1292.53	1164.44
Sbds	1197.23	1164.72	1083.9	1098.16	1462.17	1511	1410.1	1434.69	2201.86	2295.69	2230.18	2251.35	2741.94	2333.6	2257.97	1969.52
Sbspon	920.097	824.883	747.388	848.951	685.52	895.641	443.7	398.526	703.974	790.748	737.805	704.656	1331.36	945.178	714.848	1243.09
Scarb2	850.812	908.298	1184.73	1065.44	1328.88	1194.89	1217.87	1171.6	1496.33	1374.89	1798.4	1593.23	1420.68	1333.19	1377.82	1240.01
Sccpdh	1918.72	1994.76	1901.87	1685.31	1683.88	1709.09	1726.09	1746.46	1882.43	1704.2	2125.38	2048.6	2668.15	1813.72	1805.15	1897.8
Scp2	2280.84	2349.01	2303.92	2119.54	3881.89	3647.19	3956.44	3847.01	5760.5	5656.89	6906.45	6372.93	6215.58	6743.97	6147.87	5593.92
Sdha	1727.49	1819.69	1652.32	1902.43	1630.83	1673.27	1566.78	1776.09	1919.65	1976.87	1660.06	1943.34	2205.2	2633.24	2995.68	2378.23
Sdhb	1205.55	1294.48	1071.3	1222.14	983.395	1104.27	1246.84	1142.68	1127.29	1066.57	924.353	1021.53	1166.68	1278.65	1252.08	1224.59
Sec22b	2419.41	2494.22	2466.51	2231.56	1921.9	1791.28	1942.01	1904.46	1620.38	1596.18	1683.12	1822.58	1500.69	1672.88	1544	1535.36
Sec23a	1201.85	1162.66	1354.88	1275	738.566	696.844	714.924	717.347	607.837	585.195	553.354	689.145	500.229	630.349	529.322	484.282
Sec31a	2630.96	2504.51	2436.26	2536.78	2106.89	2085.61	2085.52	2458.17	1780.09	2041.89	1301.64	1893.49	1422.24	1631.45	1630.17	1493.72
Sec61a1	4913.65	5052.28	4533.48	4625.49	4200.17	4601.84	4726.66	4481.13	3460.95	3543.68	3343.18	3223.03	2392.4	2544.18	2310.73	2738.35
Sec61b	900.697	760.005	693.193	760.217	610.711	697.546	1005.9	730.749	629.545	546.392	452.744	468.663	488.578	468.101	432.602	484.282
Sept11	3668.38	3535.36	4058.33	3886.04	2060.64	2081.4	1909.1	1829.69	2439.1	2568.36	2142.15	2721.13	1977.61	1549.29	1693.48	1570.83
Sept2	15808.9	15877.7	16627.8	15069.7	12184.3	11193.1	11488.8	10785.6	9147.02	9284.47	10815.6	10922.2	9210.74	9353.74	8783.93	8596.01
Sept6	567.208	492.252	540.69	541.214	269.312	288.01	293.606	270.151	348.886	311.475	404.535	339.033	229.142	217.481	171.458	171.195
Sept7	4904.41	5581.61	5559.41	4609.76	3745.88	3064.15	3500.89	3093.69	2815.9	2622.89	3988.76	3353.76	4070.19	4059.64	3727.24	4137.99
Sept8	5685.02	5274.72	5409.43	5361.79	5933.01	6030.65	6119.64	5898.9	6757.53	6755.96	6952.56	7365.65	7058.36	5981.75	5709.99	6663.5
Sept9	1689.62	1521.04	1497.3	1609.17	1611.79	1759.67	1730.04	1766.21	2034.39	1784.95	1521.72	1795.99	1467.29	1068.76	1242.41	1069.58
Serpinb6a	557.97	493.282	520.525	512.265	673.279	618.168	605.644	575.571	1652.94	1293.09	1796.3	1641.98	2686.79	3017.8	2927.98	3241.91
Serpinf1	2171.84	2152.32	1995.14	2088.71	2030.72	2300.57	2272.48	2157.69	4765.01	6096.31	4579.84	5678.24	5068.32	10180.9	8490.25	5227.62
Serping1	530.257	438.702	408.354	468.842	946.671	996.093	917.683	969.16	3997.46	4817.9	3332.7	4484.98	7305.37	9645.1	10446.6	8053.12
Serpinh1	29478.2	28769	24874.3	26937.3	13955.2	15435.2	17006.8	14629.1	18177.7	16387.6	14039.3	14929.6	8714.4	9712.76	10255.8	14641.8
Set	3541.82	3866.96	3952.46	3684.03	2499.97	2388.38	2500.26	2437.01	1744.43	1778.66	2008	1935.59	1784.98	1797.84	1897.47	2038.15
Sfn	12.9331	7.20872	10.0828	6.29318	0	4.91725	6.58309	8.46428	12.4048	13.6336	0	11.0795	16.3118	12.4275	18.4647	25.4479
Sft2d2	344.574	256.424	466.33	358.082	678.719	626.598	624.077	574.16	1167.61	1205	1429.5	1134.54	1453.31	1484.39	1364.63	1262.37
Sfxn3	1332.11	1532.37	1266.65	1353.66	1572.34	1588.97	1622.07	1675.93	2215.81	2491.8	2293.07	2706.72	3342.37	2941.86	2956.99	2941.17
Sgcd	97.922	92.6835	99.5677	123.346	58.4868	59.0069	67.1475	44.4375	102.34	99.63	106.898	105.255	164.672	135.321	138.925	165.797
Sirt2	1842.04	1603.42	1203.63	1479.53	1775.01	2034.33	2034.18	1888.24	3006.62	3059.17	2387.39	2544.96	3161.39	2564.89	2633.42	2570.24
Skp1	5868.85	6334.4	6175.72	5835.67	4987.7	4579.36	4791.17	4814.06	4561.88	4455.03	6137.2	5292.68	5765.84	5487.42	5548.21	5159.76
Slc16a1	1040.19	1032.91	1017.1	937.055	1596.83	1369.1	1482.51	1422	3045.39	2841.03	3020.39	3409.16	2115.88	1906.93	2046.07	2109.87
Slc25a1	379.679	367.645	286.1	345.496	1225.5	1296.05	1497	1510.87	2085.56	2040.84	1595.09	1773.83	2919.82	1944.9	1970.45	1988.8
Slc25a10	1209.24	1218.27	1015.84	996.211	2038.88	2640.56	2680.63	2647.91	2004.93	1808.02	1412.73	1361.67	1905.38	1199.94	1133.38	1011.75
Slc25a11	622.636	623.039	578.501	676.517	529.102	566.888	526.647	608.017	575.274	577.854	433.88	532.924	556.155	724.245	706.056	579.133
Slc25a12	284.528	284.229	294.922	307.107	372.684	272.556	293.606	299.776	302.368	350.278	299.733	347.896	295.943	408.035	378.966	300.748
Slc25a20	458.201	494.312	444.904	461.92	470.615	413.049	512.165	523.374	488.44	499.199	482.089	452.044	563.146	633.801	649.782	580.676
Slc25a24	1077.14	1134.86	1170.87	1104.45	934.429	752.339	779.438	793.526	855.934	874.647	737.805	867.525	820.252	971.414	900.375	1018.69
Slc25a3	4107.18	4403.5	3942.38	4244.75	3107.96	3195.51	3084.84	3060.54	2747.67	2890.32	2823.36	3043.54	2834.37	3756.55	3522.36	3130.1
Slc25a4	4520.11	5103.77	4336.87	4641.85	3230.38	3371.83	3496.94	3329.99	3481.11	3523.76	3447.98	3093.4	3530.34	5822.27	5148.14	3203.36
Slc25a5	2876.69	3566.26	3074	2930.11	4842.17	4705.8	4905.72	5025.66	3707.5	3755.53	3500.38	3588.65	2811.07	2845.2	2620.23	2999
Slc2a1	521.942	429.434	414.655	468.842	652.876	735.479	812.354	700.419	3256.27	3137.82	2423.02	3005.87	2205.98	1657	1944.95	2220.91
Slc3a2	924.716	884.613	872.163	874.123	2283.71	2257.02	2267.22	2030.02	2974.06	3226.96	2492.19	2962.66	3400.63	2816.89	3202.31	3018.28
Slc44a1	9455.01	9840.93	9482.88	8617.89	16391.3	13927	12867.3	14772.3	11432.6	11558.1	13291	12671.6	15500.9	8611.54	9363.37	7804.04
Slc44a2	2115.48	2100.83	2070.76	2203.87	3326.95	3426.62	3277.06	3193.85	5920.21	6185.45	5487.43	5823.39	7408.67	5268.56	5801.44	5145.88
Slk	658.664	612.741	829.311	782.872	674.639	703.166	662.259	572.749	606.286	674.338	737.805	701.332	486.248	557.855	503.823	418.734
Snap91	32.3327	40.1629	25.207	84.958	59.847	52.6848	50.0315	63.4821	32.5627	56.6318	90.1296	55.3975	30.2934	13.8083	47.4807	34.7017
Sncg	2182.92	1970.04	1785.92	1713.63	293.794	282.39	376.553	350.562	888.496	1057.13	978.85	939.542	12817.2	13986.4	13131.1	15408.3
Snd1	2841.58	2863.92	2852.17	2780.96	1927.35	1886.11	2021.01	2009.56	1823.51	1835.29	1722.94	1758.32	1558.17	1603.83	1777.89	1666.45
Snta1	346.422	355.287	341.555	380.108	945.311	1057.91	1121.76	950.82	2330.56	2290.44	1982.85	2260.22	2623.1	1904.85	1937.04	1713.49
Snx1	434.182	432.523	441.123	417.238	350.921	325.943	363.387	331.517	316.323	343.986	226.372	335.709	505.666	454.983	431.723	468.859
Snx2	1925.18	2183.21	2112.35	1903.69	1686.6	1452.69	1507.53	1473.49	1245.14	1211.29	1693.6	1519	1821.49	2187.92	1717.22	2229.39
Snx6	1827.26	1786.73	1893.05	1715.52	1513.86	1458.31	1464.08	1488.3	1269.95	1289.95	1188.45	1394.91	1350	1285.55	1158	1238.47
Sod2	579.218	570.519	563.377	599.111	1220.06	1012.95	1023.01	985.383	1603.33	1616.1	1896.91	1634.23	1398.16	1571.38	1476.3	1212.25
Sorbs1	1098.39	1009.22	1270.43	1101.31	2664.55	2428.42	2422.58	2223.28	2392.58	2619.75	2242.76	2728.88	1558.94	1495.44	1393.65	1314.04
Sord	509.933	497.402	562.116	502.196	599.83	498.047	476.616	486.696	841.978	828.502	1307.93	951.729	1391.17	1487.84	1432.33	1458.24
Sparc	86966.7	79019.9	73895.6	80836.6	110507	124554	108554	109136	205922	228585	197623	216046	182411	206196	178995	124265
Sptan1	9215.75	8341.52	8707.76	8875.28	10122.3	10425.3	10019.5	10160.7	14298.1	13715.4	11951.6	13614.5	15472.9	12444.7	13544.3	13026.3
Sptbn1	9250.85	8059.35	9694.62	9254.13	8698.22	8554.6	8401.34	7509.93	13336.7	12289.1	13395.8	12021.3	11676.2	11703.2	11380.4	10324.9
Sri	675.292	627.158	641.519	623.025	561.746	494.534	541.13	515.616	803.213	792.845	737.805	726.815	1001.24	905.824	958.407	1000.95
Ssr1	4151.52	4545.61	4610.36	4072.95	2895.78	2493.04	2612.17	2531.52	1711.87	1603.52	2274.2	1923.4	1768.67	1831.67	1748.87	1836.88
Ssr3	4562.61	5003.88	5367.83	4376.91	4991.78	4268.17	4321.14	4139.74	3274.88	3118.94	4833.46	3878.93	3350.14	3913.96	3385.2	3641.37
Ssr4	872.983	841.36	744.867	809.933	567.186	616.061	642.51	587.562	705.525	631.34	670.732	534.032	656.357	804.333	731.555	611.522
Steap3	50.8086	65.9083	36.5502	69.225	84.3299	95.5351	94.7965	96.6338	395.404	420.544	368.903	436.532	482.364	783.621	675.281	621.547
Stip1	2273.45	2600.29	2431.22	2516.02	1502.98	1466.04	1373.23	1464.32	1159.85	1205	1232.47	1158.92	1145.71	1106.04	1107	1661.06
Stk39	1381.07	1470.58	1477.13	1298.28	2172.17	2023.1	2028.91	2128.77	1670	1521.72	1953.51	1722.86	1562.83	1239.99	1284.62	1145.16
Stoml2	655.892	675.56	608.749	607.292	496.458	512.798	559.563	544.535	390.752	447.811	310.214	418.805	441.196	520.573	547.787	504.332
Stx12	2038.81	2057.57	2161.5	1936.41	2588.38	2412.96	2520.01	2380.58	2335.21	2393.22	2888.34	2679.02	2956.32	2564.2	2451.41	2316.53
Stx1b	90.5316	90.6239	81.9228	93.7684	61.2072	82.8907	57.9312	69.8303	62.0242	81.8015	23.0564	59.8293	38.8377	52.4715	46.6014	45.4978
Stx7	1241.58	1253.29	1245.23	1123.96	1161.58	1097.25	1213.92	1137.03	1200.17	1203.95	1347.75	1465.82	1713.52	1800.6	1625.77	1797.55
Stxbp1	527.485	508.73	511.702	534.291	599.83	611.143	555.613	567.812	783.055	889.329	905.489	808.803	1084.35	849.901	979.509	849.036
Stxbp6	206.929	181.248	214.26	207.046	259.79	208.632	227.775	185.509	175.218	167.798	268.293	186.136	86.9964	112.538	74.7381	158.857
Sucla2	1112.25	1307.87	1204.9	1168.02	1332.96	1264.43	1241.57	1376.86	1550.6	1509.13	2177.78	1894.59	2223.85	2276.99	2172.68	1880.06
Suclg1	1422.64	1382.01	1226.32	1387.65	1342.48	1294.64	1136.24	1402.95	1356.78	1231.22	1142.34	1152.27	1272.32	1576.22	1596.76	1489.86
Sult1a1	791.69	683.798	670.507	703.578	481.496	511.394	452.917	492.339	2417.39	2624.99	2536.21	2960.44	3340.82	4378.61	3488.07	3616.69
Surf4	7271.17	7281.83	6936.97	6992.99	4348.43	4738.82	4406.72	4368.27	3600.5	4080.64	3458.46	3739.33	2762.91	3182.12	3004.47	3278.16
Susd2	87.7602	54.5803	132.337	81.1821	89.7705	153.84	126.395	141.777	462.08	485.565	339.558	450.936	361.19	412.868	396.552	426.446
Svip	194.92	149.323	128.556	141.597	3778.52	3444.88	3665.47	3273.56	5486.04	5153.49	7489.14	5921.99	6662.21	4489.77	3941.78	3991.47
Syncrip	2205.09	2433.46	2593.8	2204.5	1451.29	1397.9	1435.11	1436.81	914.857	1022.52	1268.1	1089.11	756.558	941.035	726.279	887.593
Sypl1	825.87	885.642	990.636	874.753	1077.25	960.97	1004.58	892.276	1311.81	1266.87	1783.73	1558.89	1627.3	1565.86	1433.21	1572.37
Tagln	1565.83	557.131	2258.55	1649.44	1032.36	881.592	961.131	1090.48	2062.3	2751.89	1416.92	2099.57	3173.81	3855.28	6065.22	7544.16
Tagln2	6041.6	5855.54	5742.16	6159.77	3112.04	3335.3	3076.94	3343.39	3702.84	4130.98	3058.12	3353.76	3719.1	6777.11	5639.65	8611.43
Tagln3	15.7045	10.2982	7.5621	9.43978	2.72032	8.42956	7.89971	2.82143	6.20242	9.43863	0	2.2159	37.2842	24.8549	13.1891	12.3384
Taldo1	1819.87	1868.09	1497.3	1582.11	2921.62	3012.16	3188.85	2988.59	3170.99	2949.05	3049.74	2738.85	3729.97	3008.83	3058.11	3032.16
Tcp1	3268.38	3547.72	3624.77	3480.76	2094.65	1938.8	1935.43	2055.41	1533.55	1492.35	1739.71	1701.81	1562.83	1716.37	1558.95	1816.06
Tecr	1529.8	1570.47	1310.76	1432.96	2222.5	2066.65	2190.85	2220.46	3009.72	3319.25	2928.17	2919.45	3527.24	2491.02	2687.06	2310.36
Tf	934.878	1043.2	927.618	1008.17	1339.76	1365.59	1298.19	1252.71	3127.57	4132.02	2974.28	3299.48	9085.68	9537.39	7377.09	10372.7
Tgfbi	17554.8	16699.5	14172.6	14974.6	15799.6	16886.5	15081.9	14273.6	16028.6	16306.8	12144.4	16052	6078.1	7491.69	6784.47	6118.3
Thy1	833.26	596.264	742.347	747.63	511.42	421.478	466.083	372.428	466.732	512.832	326.982	454.259	507.997	763.599	512.616	495.849
Timm50	340.879	371.764	316.348	316.547	250.269	349.124	321.255	335.044	293.064	315.67	341.654	243.749	321.576	336.922	327.969	346.246
Tjp1	2950.59	3011.18	3392.86	2840.11	5436.56	4781.67	5029.48	4550.25	5383.7	5468.11	6296.5	6215.6	4556.44	4294.38	4647.83	4205.08
Tjp2	1857.75	1779.52	1843.89	1658.25	4362.03	4117.14	4372.49	4493.12	4175.78	3914.94	4311.55	4214.64	3020.02	2004.96	2412.72	2149.19
Tkt	3119.65	3157.42	2711.01	2913.12	4055.99	4445.89	5038.7	4936.79	6444.31	5621.23	4359.76	5072.2	5774.38	4114.87	4338.33	4529.73
Tln1	4415.73	4028.64	4256.2	4120.78	4537.49	4810.47	5109.8	4888.12	6489.28	5968.36	5384.72	5270.52	5449.7	4820.48	4871.17	4775.73
Tln2	614.322	544.773	641.519	639.388	756.249	727.752	788.654	716.642	541.161	478.224	406.631	454.259	315.362	383.18	303.349	295.35
Tm9sf3	2847.13	3064.73	3555.45	2928.22	2650.95	2294.95	2321.2	2219.05	2073.16	2117.4	2850.61	2677.92	2181.9	2163.76	1998.59	1996.51
Tmed10	3904.87	4039.97	4045.73	3952.12	3789.4	3893.05	4022.27	3908.38	3747.81	3831.04	3754	3708.31	3630.55	3201.45	3262.1	3111.59
Tmed2	6645.76	7003.78	6892.86	6493.94	5458.32	5347.86	5457.38	5060.23	4380.46	4512.72	5500	5167.48	4473.32	4813.57	4491.32	4666.23
Tmed4	1046.66	1085.43	1101.55	1042.78	1222.78	1277.78	1181.01	1258.36	1324.22	1178.78	1159.11	1239.8	1230.38	1045.29	1223.95	1156.72
Tmed9	3664.68	3595.09	3226.5	3200.71	2856.33	2882.21	2959.76	2866.57	2769.38	2746.64	2246.95	2530.56	2443.67	2501.37	2608.8	2788.48
Tmx1	2323.34	2585.87	2716.06	2232.19	1853.9	1575.63	1673.42	1625.85	1173.81	1190.32	1760.67	1366.1	1250.57	1289.69	1067.44	1202.99
Tns3	4886.86	4720.68	5001.07	4609.13	4990.42	4891.96	5094	5199.18	8249.22	8222.1	7807.74	8907.92	9497.36	6470.57	6482.87	6227.03
Tom1l2	250.348	253.335	225.603	271.236	423.01	444.659	463.45	485.285	674.513	659.656	635.1	642.611	578.681	481.219	565.372	459.605
Tomm34	339.032	369.704	359.2	377.591	272.032	261.316	290.973	255.339	338.032	340.84	301.83	321.305	495.569	491.575	532.839	576.82
Tomm40	324.251	325.422	209.218	292.004	276.112	292.225	285.706	322.348	213.983	247.502	165.587	185.028	219.044	247.859	233.007	216.693
Tomm70	206.006	270.842	264.674	210.822	190.422	161.567	100.063	150.946	89.9351	119.556	354.23	131.846	123.504	202.982	174.975	168.111
Tpi1	3509.49	4024.52	3133.23	3870.31	2083.76	2075.08	1968.34	1989.81	2925.99	2913.39	3420.73	2903.94	5542.91	6697.02	6240.2	4838.19
Tpm1	5607.42	6271.58	5727.03	7245.97	3845.17	3572.73	3806.34	3703.83	3729.2	4628.08	3181.79	3938.76	4429.82	19335.1	15560.5	7143.93
Tpm3	3951.06	3782.52	3690.31	4196.92	2478.21	2561.88	2842.58	2892.67	2868.62	2458.24	2573.93	2355.5	2636.3	2818.27	2699.37	3008.26
Tppp3	1466.06	1485	1328.41	1834.46	792.973	848.576	904.517	820.329	1725.82	1829	970.466	1493.52	1058.71	1449.18	1522.9	3180.99
Tsg101	1090.07	1150.31	1091.46	1094.38	1052.76	984.152	955.865	1017.12	1133.49	1105.37	1266.01	1232.04	1531.76	1295.91	1255.6	1229.21
Tspan15	218.015	256.424	170.147	181.873	667.838	687.712	609.594	692.66	586.128	603.024	320.694	558.407	525.085	275.476	352.588	348.56
Tst	76.6747	78.2661	57.9761	56.0093	319.637	345.612	473.983	409.107	462.08	413.202	368.903	309.118	425.661	459.126	476.566	620.776
Tuba1c	1687.77	1804.24	1703.99	1644.41	539.983	677.175	679.375	680.669	1654.49	1853.12	2280.49	2215.9	6822.23	4558.12	4914.25	4418.69
Tuba4a	259.586	327.482	137.378	404.652	58.4868	74.4611	47.3983	75.4731	57.3724	65.0217	35.6326	46.5339	125.834	403.202	304.228	124.926
Tuba8	0.923792	1.02982	2.5207	2.51727	6.8008	6.32217	3.94985	11.2857	1.5506	11.5361	0	1.10795	0.776753	167.771	167.941	10.0249
Tubb1	19.3996	17.5069	7.5621	23.2848	1.36016	0	0	1.41071	1.5506	0	0	0	0	0	2.63782	0
Tubb2a	1773.68	2123.48	1683.83	1658.88	4744.24	5072.49	5573.25	5150.51	4777.41	5030.79	3536.02	4030.72	4390.21	3081.32	3431.8	3356.04
Tubb2b	7790.34	7912.08	6071.11	6932.57	5024.43	5260.75	5882.65	4969.94	2104.17	2121.59	1609.76	1535.62	1376.41	804.333	928.512	636.199
Tubb3	469.286	432.523	316.348	426.678	199.943	308.382	325.205	311.768	449.675	321.962	238.948	192.783	607.421	240.955	321.814	410.252
Tubb4a	216.167	201.844	142.42	196.977	1156.14	1286.91	1274.49	1350.05	2986.46	2935.41	2263.72	2644.68	5951.48	3425.84	3583.91	3253.48
Tubb4b	5083.63	4728.92	4525.92	4707.93	2672.71	2642.67	2936.06	2859.51	2893.43	2816.91	2500.57	2602.57	3023.12	2345.34	2454.93	2390.56
Tubb5	33572.4	31862.5	29882.9	30787.5	16419.8	17112.7	18751.3	18821.7	12777	11664.1	10348.1	10962.1	10553	8273.93	8288.9	8444.09
Tubb6	2997.71	3007.07	2428.7	3108.2	892.264	1005.93	1165.21	1078.49	857.484	830.6	479.993	607.157	589.556	767.741	651.541	841.324
Tufm	1056.82	1164.72	1003.24	1122.7	637.915	701.761	729.407	694.776	590.78	625.047	442.264	551.759	571.691	682.13	657.696	648.537
Twf2	267.9	278.051	167.627	251.098	204.024	250.077	300.189	258.866	268.255	235.966	115.282	187.244	296.72	272.023	263.782	259.106
Txndc5	7204.65	7100.59	6853.79	6707.28	4307.62	4478.91	4203.96	4137.62	3583.45	3797.48	3091.66	3688.37	2675.14	3033.68	3114.38	2846.31
Uba1	3802.33	3921.54	3860.45	3835.7	3248.06	3257.32	3187.53	3322.23	3141.52	3153.55	2814.98	3056.83	2806.41	2577.32	2623.75	2700.57
Ube2d1	345.498	336.75	306.265	351.16	210.825	273.961	209.342	228.535	158.162	203.455	291.349	163.977	163.895	388.013	276.971	217.464
Ube2i	165.359	98.8624	132.337	115.795	121.054	80.0809	81.6303	108.625	106.992	102.776	44.0168	88.636	25.6329	43.4961	40.4465	57.8362
Ube2l3	3037.43	3107.99	2959.3	2901.79	2523.1	2535.89	2472.61	2462.4	2477.87	2545.28	2689.22	2625.84	3291.88	2906.65	2798.72	2969.7
Ube2m	1003.24	936.104	783.938	1014.46	858.26	993.986	882.134	974.802	989.286	1055.03	572.218	914.059	1121.63	1010.77	1030.51	1108.14
Ube2n	2119.18	2539.53	2370.72	2106.96	1621.31	1518.73	1465.4	1647.01	1099.38	1182.98	1266.01	1276.36	1302.62	1343.55	1286.38	1371.88
Ube2v1	2199.55	2133.78	1782.14	1984.24	1598.19	1928.26	2028.91	1815.59	1919.65	1842.63	1781.63	1602.1	2016.45	1861.36	1737.44	1929.42
Ubl3	3639.74	3743.38	3619.73	3052.82	4900.65	4864.56	5370.49	4962.18	3626.86	3352.81	4204.65	3534.36	3129.54	2528.99	2462.84	2478.48
Uchl1	331.641	313.064	228.123	280.676	88.4103	95.5351	147.461	121.321	125.599	171.993	138.339	110.795	1732.94	950.701	1026.99	1095.8
Ufd1	698.387	724.991	748.648	750.148	822.896	856.303	841.319	899.329	736.537	814.869	668.636	884.144	908.802	820.903	845.86	768.836
Ugp2	1269.29	1553.99	1339.75	1395.83	1069.09	1010.85	995.363	1042.52	1028.05	1031.96	1479.8	1201.02	1262.22	2020.84	1756.79	1519.94
Ugt8	2338.12	2358.28	2566.07	2040.88	36504	31738.7	31444.8	28114.8	53885.1	52162.1	76704.5	63221.8	32782.9	19995.8	21640.7	19055.1
Uqcrb	874.831	1042.17	854.518	963.487	904.506	849.279	879.501	868.294	911.755	932.327	1129.76	1084.68	1124.74	1410.52	1340.01	1336.4
Uqcrc1	1249.89	1457.19	1180.95	1344.85	1191.5	1293.24	1357.43	1364.16	1054.41	1117.95	796.495	999.371	1066.48	1298.67	1321.55	1146.7
Uqcrc2	2112.71	2404.62	2513.14	2405.26	2512.21	2268.96	2377.81	2355.18	1964.62	1912.9	2349.66	2230.3	2418.03	2834.15	2778.5	2262.55
Uqcrfs1	1399.54	1572.53	1467.05	1510.36	1433.61	1358.56	1346.9	1445.28	1153.65	1165.15	1471.42	1246.44	1157.36	1589.34	1414.75	1179.09
Usp5	1831.88	1824.84	1818.69	1919.42	1696.12	1832.03	1730.04	1778.91	1759.94	1751.39	1513.34	1625.36	1631.18	1351.14	1428.82	1340.26
Vamp3	2241.12	2368.58	2250.99	2264.92	1984.47	1938.1	1936.75	2012.38	1860.73	1757.68	1938.84	2097.35	2283.66	2410.24	2119.05	2091.36
Vapa	2943.2	3161.54	2842.09	2907.45	2324.51	2258.42	2032.86	2049.06	2136.73	2094.33	2814.98	2498.43	3010.7	3113.08	2794.33	2859.42
Vapb	364.898	384.122	326.431	417.867	412.128	394.082	418.685	404.875	414.011	382.789	385.671	372.271	427.991	366.61	367.536	434.928
Vat1	3588.01	3754.71	3425.63	3491.46	3890.06	4028.63	4103.9	3918.96	4564.98	4896.55	3443.79	3829.08	5958.48	5663.47	5761.87	6334.22
Vat1l	2734.42	2955.57	2815.62	2599.71	11260.8	10423.9	10996.4	10102.8	15972.8	15792.9	20402.8	18560.4	16099	10637.2	10570.6	9876.89
Vcl	6347.38	6946.11	7462.54	6588.96	6024.15	5631.65	5648.29	6082.99	3574.14	3812.16	4424.74	3603.05	3524.91	3217.33	3299.91	4189.66
Vcp	6654.07	6747.36	7076.87	6789.09	5516.81	5439.18	5639.08	5752.89	4889.06	4757.07	5175.12	4874.98	4684.6	4658.23	4377.9	4539.76
Vdac1	3423.57	3867.99	3476.05	3330.35	2022.56	2221.89	2153.99	2056.11	1868.48	1834.24	1836.13	1774.94	1700.31	2006.35	1784.04	1595.51
Vdac2	2799.09	3017.36	2979.47	2853.33	3056.28	3252.41	2979.51	2975.19	2899.63	2722.52	3016.2	3076.78	3593.26	3353.35	3076.57	3129.33
Vdac3	2739.04	2948.37	2784.11	2926.33	2219.78	2142.51	2176.37	2245.15	1930.5	2063.91	2666.16	2327.8	2643.29	2974.31	2805.76	2575.64
Vim	77916.3	73574.2	68215.2	68685.7	68129	71026.1	78765.4	75470.3	67000.1	64084.1	56632.9	63901	73592.7	60532.1	60627.6	56945.6
Vps26a	551.504	532.415	667.986	569.533	688.241	635.73	660.942	622.83	655.906	702.654	1064.79	871.957	880.838	730.459	764.967	700.975
Vps26b	1358.9	1372.75	1363.7	1331.64	1206.46	1157.66	1212.61	1256.95	1215.67	1213.39	1507.05	1270.82	1350.77	1163.35	1167.67	1095.8
Vps29	727.948	763.094	702.015	746.372	867.782	798.701	833.419	802.696	880.743	943.863	1073.17	1012.67	1137.17	1068.07	1021.71	1138.22
Vps35	3018.03	3431.35	3627.29	3222.74	3624.82	3155.47	3279.7	3150.12	3256.27	3036.09	5045.16	3914.39	4039.12	3767.59	3483.68	3534.95
Vsnl1	26.79	36.0436	59.2365	38.3884	28.5633	30.9084	27.649	26.0982	348.886	348.181	440.168	471.987	830.349	492.956	622.525	471.944
Vwa5a	680.835	872.255	956.606	818.743	840.578	653.994	660.942	631.294	755.144	705.8	565.93	845.366	815.591	1079.12	1021.71	824.359
Wars	1095.62	1188.41	1144.4	1069.21	1187.42	1149.93	1184.96	1207.57	1268.39	1213.39	1442.07	1271.93	1145.71	923.085	1107	1155.18
Wdr1	4325.19	4180.03	4167.98	4181.82	2898.5	2968.61	3074.3	3234.76	3526.07	3584.58	3188.07	3553.2	3867.46	3526.64	3680.63	4085.55
Yars	1005.09	1053.5	980.553	1062.29	912.667	811.346	804.454	900.74	617.141	608.267	538.682	577.242	555.379	539.214	657.696	698.662
Ybx1	964.439	909.328	1211.2	967.892	1405.04	1052.99	990.097	904.267	798.561	685.874	628.811	757.838	523.532	814.69	731.555	703.289
Ybx3	7903.96	7211.81	3348.75	4563.19	1749.16	1965.49	1885.4	2089.97	2533.69	2265.27	1735.52	1877.98	2491.05	2700.21	2707.28	2493.9
Ykt6	971.829	1029.82	1078.86	1026.42	889.544	968.697	842.636	878.874	797.011	748.798	903.392	843.15	710.729	671.083	664.73	615.377
Ywhab	5568.62	5999.71	6176.98	5476.33	4243.7	4105.9	4069.67	4216.62	4431.63	4409.94	4519.06	4549.24	5301.34	5955.52	5527.99	5603.95
Ywhae	16343.7	17865.3	16461.4	16279.2	12391.1	12624	11715.3	12870.6	11356.6	11377.7	13469.1	12303.8	12108.8	10249.2	9726.51	9876.11
Ywhag	4066.53	4721.71	4096.14	4160.42	2569.34	2816.18	2830.73	3009.76	2474.76	2527.46	2446.08	2421.98	2849.91	3579.8	3087.13	3655.25
Ywhah	4828.66	4833.96	4721.27	4729.33	1828.05	1985.86	1795.87	1871.31	1752.18	2024.06	2024.77	1913.43	2703.88	2444.76	2399.53	3002.86
Ywhaq	9665.64	10850.2	10535.3	8955.2	9580.96	9982.01	9735.08	9535.71	13705.8	11622.1	16969.5	12878.8	14495.8	11396	11421.7	11418.4
Ywhaz	14462.9	14561.6	14786.4	13593.9	10882.6	10482.9	10821.3	10295.4	9390.46	9643.14	11817.5	10818	10651.6	9464.9	8861.31	9515.22
Zc2hc1a	461.896	461.358	514.223	450.592	395.806	368.091	369.97	355.5	434.169	417.397	639.292	514.089	817.921	933.441	804.534	831.299
Zc3hav1l	48.0372	56.6399	46.633	53.4921	28.5633	33.0158	28.9656	23.9821	32.5627	26.2184	18.8643	38.7782	18.6421	17.9508	16.7062	19.2787
Zyx	2069.29	2086.41	1685.09	2052.84	1104.45	1382.45	1369.28	1354.28	1764.59	1616.1	1018.67	1279.68	1211.74	2212.78	1843.83	2727.56

## Sheet: 2 Average normalised values
gene name	E21	P6	P18	M6	Mean	Sd	COV	Cluster
Aacs	573.119	2944.41	2565.32	1210.2	1823.26	1117.49	0.612904	1				#mRNA
Abat	216.248	438.954	830.126	523.714	502.261	254.144	0.506	2		1	P6-UP	132
Abcd3	2001.9	3063.32	3234.84	2694.47	2748.63	546.496	0.198825	1		2	P18-UP	203
Abce1	2910.33	1857.7	1669.77	1592.63	2007.61	612.027	0.304854	5		3	Late-UP	186
Abhd12	349.682	916.6	1353.14	1789.57	1102.25	615.409	0.558321	2		4	U-Shaped	154
Acaa1a	140.259	337.818	412.669	476.656	341.85	145.88	0.426737	2		5	Descending	245
Acaa2	784.034	942.957	1198.03	983.969	977.248	170.585	0.174557	2		6	Unchanged	126
Acaca	356.671	1671.66	2038.01	884.364	1237.68	759.359	0.613536	1			All	1046
Acadl	1051.94	841.84	727.235	905.435	881.613	135.393	0.153574	4
Acadm	551.236	702.56	1071.71	1479.03	951.133	414.293	0.435578	2
Acads	190.312	285.319	221.119	284.69	245.36	47.4744	0.193489	2
Acadvl	629.368	860.846	931.523	1109.23	882.742	198.625	0.225009	2
Acat1	1018.22	1055.38	993.216	1128.02	1048.71	58.7172	0.05599	6
Acat2	853.986	2433.39	2494.06	996.859	1694.57	890.397	0.52544	1
Acly	10154	9968.81	10272.9	5743.12	9034.71	2197.96	0.243279	5
Aco1	1298.21	1141.46	1284.74	1189.92	1228.58	75.4666	0.0614257	6
Aco2	3230.66	3694.14	3431.11	3803.87	3539.95	258.8	0.0731086	6
Acot7	303.787	205.158	221.352	261.821	248.029	44.1539	0.178019	4
Acsl1	558.984	3023.43	3596.64	5448.64	3156.92	2017.63	0.639112	2
Acss2	344.834	1521.93	3031.3	2153.06	1762.78	1129.9	0.640978	2
Actb	32605	24800	23729.5	26315.8	26862.6	3972.63	0.147887	4
Actn1	1267.1	495.336	767.919	1340.33	967.673	404.78	0.418302	4
Actn3	81.0972	27.1283	83.5674	3593.65	946.36	1765.05	1.86509	3
Actn4	4451.84	3638.8	3884.06	4603.84	4144.63	457.897	0.110479	4
Actr1a	3590.65	3554.86	3689.3	3819.24	3663.51	118.363	0.0323087	6
Actr1b	2220.15	1941.68	2256.17	1732.84	2037.71	247.103	0.121265	5
Actr2	2404.28	2375.37	1817.43	1776.48	2093.39	342.907	0.163805	5
Actr3	3258.51	3340.91	3272.6	3694.8	3391.71	205.24	0.0605123	6
Adam10	4557.67	4395.37	6436.38	4120.34	4877.44	1054.85	0.216271	1
Add1	6259.33	5118.69	5705.2	5416.34	5624.89	486.033	0.0864075	6
Add3	7974.49	6061.88	6163.33	5418.12	6404.46	1097.48	0.171361	5
Adsl	788.537	625.108	597.578	726.088	684.328	88.7617	0.129706	4
Agk	166.741	139.314	109.107	120.533	133.924	25.1739	0.187972	5
Agps	212.064	604.134	745.919	265.197	456.828	259.425	0.567884	1
Ahcy	1082.98	854.823	775.126	1381.08	1023.5	271.751	0.265511	3
Ahsa1	1122.75	812.068	904.109	1000.96	959.971	133.132	0.138684	4
Aifm1	502.178	457.324	372.52	374.24	426.566	64.0888	0.150244	5
Ak2	1209.19	914.992	588.33	660.061	843.144	281.426	0.333782	5
Ak3	745.247	1047.58	1768.81	1577.36	1284.75	471.609	0.367083	2
Akap12	9233.25	4269.21	5617.42	3917.12	5759.25	2429.16	0.421784	5
Akr1a1	6327.77	5039.28	4646.88	5708.05	5430.5	741.448	0.136534	4
Akr1b1	1288.68	1344.61	5104.15	13977.3	5428.68	5972.24	1.10013	3
Alad	269.217	301.14	247.367	232.304	262.507	29.8831	0.113837	5
Alcam	3712.97	1854.08	1160.69	749.582	1869.33	1310.88	0.701258	5
Aldh1a1	3.91391	39.7279	1739.67	1731.37	878.671	989.519	1.12615	2
Aldh1a7	0	3.84041	6.26741	7.59754	4.42634	3.33576	0.753616	2
Aldh2	648.421	1089.58	1809.92	3455.42	1750.84	1233.11	0.704297	3
Aldh3a2	825.382	1283.41	1661.4	1797.76	1391.99	435.915	0.31316	2
Aldh6a1	1308.04	1933.55	3610.27	3590.56	2610.6	1171.14	0.44861	2
Aldh7a1	1618.02	1263.04	1141.65	889.984	1228.17	302.797	0.246542	5
Aldh9a1	1184.57	1615.19	2122.17	2278.02	1799.99	498.399	0.27689	2
Aldoa	5092.82	4107.77	6143.85	13427.6	7193.01	4238.72	0.589284	3
Aldoc	547.991	745.437	982.641	1504.53	945.15	413.091	0.437064	3
Anp32a	2518.51	1201.92	1176.46	1436.76	1583.41	634.315	0.4006	4
Anp32b	5018.89	2558.33	2050.92	1789.52	2854.42	1477.86	0.517746	5
Anpep	806.935	379.12	890.731	1389.58	866.591	414.441	0.478243	3
Anxa1	2238.2	1997.25	3022.72	4663.01	2980.29	1204.22	0.40406	3
Anxa11	745.461	1035.69	1483.61	2128.59	1348.34	602.299	0.446698	2
Anxa2	12115.1	6472.01	7704.6	7084.97	8344.16	2563.81	0.307257	5
Anxa3	636.379	529.161	811.79	1340.99	829.58	360.294	0.434308	3
Anxa5	5100.1	4315.25	5854.42	5747.39	5254.29	709.198	0.134975	2
Anxa6	6248.87	3414.61	4822.86	5528.1	5003.61	1208.77	0.241579	4
Anxa7	867.468	773.206	1010.06	1787.28	1109.5	462.224	0.416604	3
Aoc3	1049	1534.34	4550.31	11075.2	4552.22	4616.27	1.01407	3
Ap1b1	896.786	851.279	824.557	1026.91	899.882	89.7802	0.0997688	6
Ap2a2	2697.02	2019.55	2233.09	2061.09	2252.69	310.314	0.137753	5
Ap2b1	3412.79	2702.04	2898.94	2816.86	2957.66	313.986	0.106161	4
Ap2m1	4956.97	4783.56	4915.33	4882.89	4884.69	73.9206	0.0151331	6
Ap2s1	577.982	535.472	426.937	463.747	501.035	68.2829	0.136284	5
Apex1	980.603	929.442	648.337	480.592	759.744	236.582	0.311397	5
Apoa1	13.8739	9.27138	4.26127	5.4893	8.22395	4.32819	0.526291	5
Apoe	233.663	1320	4883.1	15667.6	5526.08	7046.61	1.27515	3
Apoh	2.77814	2.59122	2.73961	15.2594	5.8421	6.27874	1.07474	3
Apool	258.03	237.245	235.867	275.371	251.628	18.7969	0.0747011	6
Appl1	587.636	653.032	710.002	494.963	611.408	92.3361	0.151022	1
Arcn1	6472.86	5007.76	4557.66	4071.76	5027.51	1036.61	0.206187	5
Arf4	10062.7	5361.33	4336.47	4210.74	5992.81	2761.77	0.460847	5
Arf5	1573.51	1220.62	1140.91	1139.65	1268.67	206.725	0.162945	5
Arf6	1175.95	692.728	536.152	606.527	752.84	289.252	0.384214	5
Arhgap1	1603.19	1165.88	1205.23	1227.05	1300.34	203.482	0.156484	4
Arhgdia	7528.29	6980.13	6686.74	7654.71	7212.47	456.687	0.0633192	6
Arl1	1140.98	1048.13	1091	927.106	1051.81	91.3832	0.0868821	6
Arl3	561.233	645.028	683.415	753.173	660.712	80.0132	0.121101	2
Arl6ip5	1207.4	1168.4	1474.37	1811.99	1415.54	297.228	0.209975	3
Arl8a	2033	2107.2	2037.23	1999.3	2044.18	45.3086	0.0221647	6
Arl8b	2541.03	3406.83	3866.78	3876.26	3422.73	627.299	0.183275	2
Arpc1b	3827.2	2956.39	2521.54	3913.93	3304.77	677.943	0.205141	4
Arpc2	3904.58	4041.56	4512.37	4126.46	4146.25	260.641	0.0628619	6
Arpc3	1375.98	1344.59	1256.99	1168.45	1286.5	93.4285	0.072622	6
Arpc4	1481.26	1327.83	1395.92	1825.08	1507.52	220.815	0.146475	3
Arpc5	4092.49	3341.26	3235.4	3706.39	3593.88	388.843	0.108196	4
Art3	1147.95	3621.23	4227.97	3471.71	3117.21	1352.96	0.434028	1
Asah1	2021.11	4218.78	4830.11	5025.78	4023.94	1378.75	0.342638	2
Asl	202.928	290.101	330.949	334.094	289.518	61.1057	0.21106	2
Aspa	297.725	697.213	1653.08	2955.94	1400.99	1182.36	0.843944	3
Aspn	3944.6	2783.34	1769.65	1737.52	2558.78	1043.73	0.407903	5
Atl3	232.316	241.465	275.496	220.201	242.37	23.7395	0.0979474	6
Atp12a	0.15733	0	0	2.05238	0.552427	1.00271	1.81511	3
Atp1a1	2423.65	3929.26	6603.17	6055.21	4752.82	1934.19	0.406956	2
Atp1a2	2557.86	3513	6804.86	6357.81	4808.38	2092.01	0.435076	2
Atp1a3	9.96868	6.6171	4.44872	24.1856	11.305	8.88222	0.785687	3
Atp1a4	2.40501	3.37924	17.3361	7.06921	7.5474	6.82802	0.904686	2
Atp1b1	185.228	130.365	157.687	279.442	188.18	64.833	0.344525	3
Atp1b3	2466.19	4136.08	7322	8011.82	5484.02	2626.29	0.478899	2
Atp2a2	5433.95	4659.5	3703.89	3681.64	4369.75	843.275	0.19298	5
Atp2b1	809.111	744.295	803.881	775.286	783.143	29.8622	0.0381313	6
Atp2b2	4.44438	2.75637	9.76818	15.6354	8.15109	5.81587	0.713509	3
Atp4a	1.99483	0.529017	1.94951	0.659454	1.2832	0.797544	0.621527	5
Atp5c1	2120.02	2029.87	1701.74	1873.98	1931.4	183.771	0.0951491	6
Atp5f1a	6636.08	5857.54	4834.76	4884.43	5553.2	861.91	0.155209	5
Atp5f1b	15094.7	11861.6	10346.2	11718.4	12255.2	2012.48	0.164214	4
Atp5f1d	854.256	1001.16	829.314	1022.84	926.894	99.1966	0.107021	3
Atp5h	1472.83	1402.12	1311.26	1372.03	1389.56	67.1552	0.0483283	6
Atp5i	464.732	425.967	483.31	497.755	467.941	31.0764	0.0664109	6
Atp5mf	1208.13	920.81	906.998	1111.6	1036.88	147.479	0.142233	4
Atp5mg	1526.89	1381	1309.64	1877.78	1523.83	252.695	0.165829	3
Atp5po	1488.26	1258.46	1183.33	1319.12	1312.29	129.796	0.098908	6
Atp6v0c	1650.11	2566.75	2715.63	2986.7	2479.8	579.804	0.233811	2
Atp6v1a	1549.14	1776.96	1648.44	1780.5	1688.76	111.527	0.0660408	6
Atp6v1b2	1019.13	1198.92	1119.24	1039	1094.07	82.2099	0.075141	6
Atp6v1c1	735.919	895.216	967.505	1144.58	935.805	169.503	0.181131	2
Atp6v1d	584.999	908.6	913.036	1172.82	894.865	240.691	0.268969	2
Atp6v1e1	743.312	1057.2	1283.15	1251.17	1083.71	247.918	0.228768	2
Atp6v1g1	2537.3	2442.61	2285.56	3081.55	2586.76	345.815	0.133687	3
Atp6v1h	512.533	720.496	623.087	816.474	668.147	130.368	0.195118	2
Auh	163.436	397.974	554.751	593.448	427.402	195.221	0.456761	2
Avil	74.7254	45.3081	41.125	50.7815	52.985	15.0232	0.283537	4
Bag3	216.492	249.288	290.431	729.593	371.451	240.67	0.647919	3
Bag5	149.323	110.749	152.284	167.045	144.851	24.0191	0.16582	3
Basp1	223.526	85.413	36.6076	40.0454	96.398	87.6217	0.908958	5
Bax	421.995	470.288	402.59	350.906	411.445	49.3869	0.120033	5
Bcam	528.329	803.261	1542.04	2653.43	1381.76	949.709	0.687316	3
Bcap31	1227.6	1373.35	1976.33	2259.96	1709.31	489.701	0.28649	2
Bcas1	569.887	6381.74	6470.29	2615.44	4009.34	2913.04	0.726562	1
Bdh1	34.9297	95.115	182.593	96.439	102.269	60.7502	0.594022	1
Bgn	7186.37	6234.34	8427.93	6911.57	7190.05	917.116	0.127553	2
Bin1	1342.15	1672.03	872.697	735.296	1155.54	431.35	0.373288	5
Blvrb	291.843	250.962	264.421	510.991	329.554	122.148	0.370646	3
Bphl	87.233	199.3	175.034	271.363	183.233	75.9568	0.414538	2
Brox	1411.06	1830.39	1820.27	1680.25	1685.49	195.363	0.115909	1
Bsg	3415.35	3829.36	6128.73	6916.31	5072.44	1713.36	0.337778	2
Bzw1	3260.78	2369.28	2493.08	2075.25	2549.6	505.468	0.198254	5
C1qbp	1155.82	831.396	595.652	735.782	829.663	238.017	0.286884	5
C3	20.3315	27.9825	42.2586	113.228	50.9503	42.5015	0.834176	3
Cab39	2105.79	1983.64	2085.27	2608	2195.67	280.023	0.127534	3
Cab39l	840.594	1507.5	1559.71	1447.06	1338.72	335.258	0.250432	1
Cacybp	1484.27	984.451	819.246	1232.77	1130.18	290.872	0.257367	4
Cadm3	710.714	3023.44	8575.64	13016.2	6331.5	5545.5	0.875859	2
Cadm4	6345.82	9257.26	13023.8	7814.86	9110.44	2866.93	0.314686	1
Calm1	7501.89	4979.41	5478.09	6763.99	6180.84	1157.94	0.187344	4
Calr	19244.6	11738.2	12130.8	11189.1	13575.7	3798.97	0.279837	5
Calu	18387.7	13630.8	10419.1	6475.93	12228.4	5042.1	0.412328	5
Camk2b	110.203	926.149	1570.33	932.677	884.84	598.318	0.676188	1
Camk2d	2108.22	1438.51	1549.67	1643.41	1684.95	294.345	0.17469	4
Camk2g	689.353	750.076	796.459	930.968	791.714	102.674	0.129686	3
Cand1	2936.22	1667.16	1479.72	1283.83	1841.73	746.257	0.405192	5
Canx	16193.5	15677.9	19837.5	16538.3	17061.8	1883.96	0.110419	2
Cap1	4100.15	4882.84	5202.32	4935.56	4780.22	474.453	0.0992534	6
Capg	904.761	917.109	313.731	3074.84	1302.61	1214.57	0.932416	3
Capn1	689.933	803.372	959.583	961.943	853.708	132.011	0.154632	2
Capn2	3130.9	2864.31	5010.05	5524.9	4132.54	1331.71	0.322251	2
Capn5	4250.73	3801.95	2471.79	2152.84	3169.32	1014.8	0.320194	5
Capns1	811.304	669.946	780.477	885.103	786.707	89.3658	0.113595	3
Capza1	3949.24	2256.19	1992.74	1994.2	2548.09	942.271	0.369795	5
Capza2	3250.58	2635.68	2555.11	3299.23	2935.15	394.192	0.1343	4
Capzb	2492.74	2108.88	2455.94	2879.58	2484.28	315.206	0.12688	3
Car2	577.608	88.2065	24.4964	47.7584	184.517	263.379	1.4274	5
Car3	1341.62	3038.69	6197.46	46418.3	14249	21540.4	1.51171	3
Cast	2935.68	2535.46	3342.33	3805.26	3154.68	544.628	0.172641	3
Cat	2139.48	2398.83	2684.24	3516.58	2684.78	597.499	0.22255	3
Cav1	10791.5	10494.6	19503.3	21109.1	15474.6	5618.69	0.36309	2
Cav2	1471.94	1833.67	5972.94	11396	5168.65	4626.56	0.895119	3
Cavin1	10657.3	8327.83	12715.9	18339.9	12510.2	4279.9	0.342112	3
Cavin2	2474.16	1664.04	3115.89	3614.69	2717.2	843.141	0.310298	3
Cavin3	608.307	1078.03	1858.5	2213.35	1439.55	729.373	0.506668	2
Cct2	3125.25	2615.56	2313.83	2023.25	2519.47	470.718	0.186832	5
Cct3	3170.62	2362.02	2030.29	2004.08	2391.75	544.2	0.227532	5
Cct4	3479.42	2153.45	1932.76	2502.74	2517.09	683.122	0.271393	4
Cct5	4582.84	3131.56	2837.98	2767.62	3330	849.97	0.255246	5
Cct6a	3237.62	2077.1	1480.3	1532.16	2081.79	816.464	0.392192	5
Cct7	2701.98	2106.48	1672.3	1674.71	2038.87	486.919	0.238818	5
Cct8	3585.66	2424.62	1815.09	2207.8	2508.29	761.259	0.303497	5
Cd151	935.769	1427.87	3022.71	4510.3	2474.16	1623.59	0.656219	2
Cd36	3012.06	3083.56	3538.52	13072.4	5676.64	4936.03	0.869534	3
Cd47	465.77	870.292	982.222	852.286	792.642	225.369	0.284326	1
Cd59	1143	3159.17	3892.34	5432.15	3406.66	1781.75	0.52302	2
Cd81	5501.82	6415.66	9686.08	11759.5	8340.76	2901.92	0.34792	2
Cd82	307.006	674.664	1480.82	2003.04	1116.38	767.939	0.687881	2
Cd9	4178	23085	46333.6	25977.9	24893.6	17255.5	0.693169	2
Cdc42	4288.87	5585.49	5552.65	4844.63	5067.91	621.721	0.122678	1
Cdh1	109.705	3444.91	5338.91	6135.73	3757.31	2680.85	0.713503	2
Cdipt	779.197	1027.53	1454.26	1303.6	1141.15	299.083	0.262089	2
Cers2	2071.28	4680.75	7536.18	5771.92	5015.03	2288.12	0.456253	2
Ces1d	6.50069	9.95852	334.263	6778.27	1782.25	3334.23	1.8708	3
Cfb	59.086	93.971	420.758	1515.87	522.422	682.038	1.30553	3
Cfh	330.261	610.702	750.882	2600.24	1073.02	1033.06	0.962754	3
Cfl1	14265.8	13791.7	11280.7	8400.77	11934.7	2695.58	0.225861	5
Cfl2	3388.62	4097.34	4292.13	3177.9	3739	539.12	0.144188	1
Chchd3	851.617	1067.83	1353.44	1268.74	1135.41	223.92	0.197215	2
Cisd1	323.904	354.562	333.374	430.323	360.541	48.2548	0.13384	3
Ckap4	6242.93	2685.61	1481.33	720.177	2782.51	2444.74	0.878608	5
Ckap5	3600.3	2079.82	1889.14	1643.55	2303.2	882.978	0.38337	5
Ckb	1598.57	3344.72	2093.13	1841.02	2219.36	776.939	0.350074	1
Ckm	815.835	57.3401	158.046	5062.29	1523.38	2383.13	1.56437	3
Ckmt1	3.10751	2.23958	12.7241	53.5235	17.8987	24.2204	1.3532	3
Cldn19	91.9281	7583.64	6133	4636.47	4611.26	3244.27	0.703553	1
Clip2	1063.83	1990.13	2177.74	2300.77	1883.12	560.925	0.297871	2
Cltc	8688.61	7280.26	8559.58	8393.61	8230.51	644.907	0.0783557	6
Cmtm5	1625.67	3557.88	3634.18	2348.72	2791.61	975.131	0.349308	1
Cmtm6	1967.29	6124.16	11532.3	8201.28	6956.25	4003.01	0.575455	2
Cndp2	864.139	1059.17	1219.75	1373.24	1129.08	218.263	0.193312	2
Cnn2	404.542	258.974	223.841	282.913	292.567	78.4928	0.26829	4
Cnn3	12873	6787.59	7883.76	8696.05	9060.11	2659.51	0.293541	4
Cnp	11317.4	30682.2	23555.6	11099.5	19163.7	9636.06	0.50283	1
Cnrip1	442.428	259.681	221.393	256.459	294.99	99.8097	0.338349	5
Cntf	109.616	481.075	7138.52	12443.8	5043.25	5896.68	1.16922	3
Cntn1	42.7366	37.5605	8.74386	72.1157	40.2892	25.9581	0.644295	3
Col14a1	25099.6	16525.1	9575.79	4741.31	13985.5	8848.24	0.632674	5
Col15a1	4999.58	12156	25797.5	7264.63	12554.4	9320.13	0.742378	1
Col18a1	7627.59	5851.02	3789.42	2881.26	5037.32	2127.4	0.422328	5
Col1a1	202277	201117	298107	121734	205808	72161.9	0.350627	1
Col1a2	64910.4	66558.7	103908	49818.9	71299.1	23007.7	0.322692	1
Col28a1	105.494	3503.33	6438.11	1496.43	2885.84	2748.38	0.952365	1
Col4a2	9627.03	11260.4	10567	7552.09	9751.62	1611.9	0.165295	1
Col6a1	12385.7	11144.7	16443.1	6371.93	11586.4	4147.79	0.357989	1
Col6a2	13326.2	12331.9	17767.1	9362.42	13196.9	3481.11	0.263782	1
Comt	1215.86	1304.45	1479.01	1703.45	1425.69	215.033	0.150827	2
Copa	5649.3	4449.67	4059.49	3259.22	4354.42	995.36	0.228586	5
Copb1	3541.22	2386.38	1922.07	1864.52	2428.55	777.702	0.320234	5
Cope	979.78	1037.05	857.125	780.364	913.581	116.278	0.127278	5
Copg1	3205.3	2724.21	2461.43	2046.75	2609.42	485.369	0.186006	5
Copg2	821.028	1067.8	1142.16	1146.02	1044.25	153.108	0.14662	2
Cops4	1380.21	1309	1221.31	1270.19	1295.18	67.0879	0.0517982	6
Coro1a	119.816	155.08	83.986	314.028	168.228	101.441	0.603	3
Coro1c	3050.19	1743.95	1333.38	1438.08	1891.4	791.921	0.418695	5
Cox4i1	2557.74	2257.16	2236.79	2935.25	2496.73	327.102	0.131012	3
Cox6a1	1918.02	1604.62	1483.55	1650.66	1664.21	183.296	0.110139	4
Cox6b1	1645.97	1505.41	1411.2	1570.4	1533.24	99.593	0.0649557	6
Cox6c	1342.33	1368.93	1238.24	1632.41	1395.48	167.72	0.120188	3
Cp	357.796	682.929	1604.35	3884.58	1632.41	1591.56	0.974974	3
Cpne3	300.282	445.699	478.783	396.408	405.293	77.7599	0.191861	1
Cpne6	2.3932	2.89872	1.07834	2.8049	2.29379	0.839517	0.365995	4
Cpt1a	1242.81	1994.01	1573.88	1256.45	1516.79	353.004	0.232732	1
Crip2	1851.57	2660.43	4367.65	4185.48	3266.28	1214.69	0.371887	2
Crmp1	150.068	43.7062	27.8911	29.9978	62.9158	58.523	0.93018	5
Cryab	1559.14	9358	16191.8	15543.6	10663.1	6806.13	0.638287	2
Cs	1963.88	1686.76	1463.81	1686.34	1700.2	204.759	0.120432	4
Csnk2a1	951.582	1115.79	1006.67	775.316	962.338	142.132	0.147694	1
Csrp1	9845.05	7010.66	10356.1	14084.2	10324	2906.75	0.281552	3
Cst3	2350.14	4061.85	14432.5	42627.7	15868.1	18621.3	1.17351	3
Ctnna1	7854.07	6245.36	6101.84	6295.97	6624.31	823.952	0.124383	4
Ctnnb1	6283.84	4910.13	4412.8	3280.95	4721.93	1244.59	0.263576	5
Ctnnd1	5058.37	4042.63	4515.21	4400.29	4504.13	420.742	0.0934126	6
Ctsd	3255.34	4813.83	6419.72	8227.98	5679.22	2134.53	0.375849	2
Cttn	3551.69	2903.91	2708.02	2312.17	2868.95	517.449	0.180362	5
Cyb5a	670.674	1083.98	2977.37	3428.08	2040.02	1365.58	0.669394	2
Cyb5b	1106.96	1112.2	1164.15	1149.91	1133.31	28.0847	0.0247812	6
Cyb5r3	1528.53	2032.45	3280.63	4407.93	2812.39	1293.78	0.460029	2
Cyc1	1328.46	1243.23	1111.29	1096.76	1194.93	110.748	0.0926815	6
Cycs	2163.98	1570.94	1525.3	1815.95	1769.04	292.595	0.165397	4
Cyfip1	2875.72	2611.03	2795.18	2585.28	2716.8	141.285	0.0520043	6
Cyp51	3460.79	9064.9	12662.3	7008.95	8049.24	3849.17	0.478203	1
Dad1	1707.69	1546.24	1468.63	1167.51	1472.52	226.412	0.153759	5
Dag1	19733.7	38727.6	47597.6	27667	33431.5	12241.8	0.366176	1
Dars	1586.37	1494.98	1380.52	1417.71	1469.9	91.116	0.0619881	6
Dcn	11341.5	13654.1	41411.9	71646.9	34513.6	28275.6	0.819261	3
Dctn1	2236.53	2684.4	2533.43	2308.06	2440.61	205.967	0.0843916	6
Dctn2	2427.76	2051.42	2298.04	2637.47	2353.67	245.275	0.104209	3
Dctn4	601.918	505.33	592.229	620.957	580.108	51.2607	0.0883641	6
Ddah1	2030.14	7746.37	9439.42	10617.4	7458.33	3805.81	0.510277	2
Ddah2	2275.16	2300.05	2224.89	2216.15	2254.06	40.2007	0.0178348	6
Ddost	2735.07	2034.4	1976.04	1876.83	2155.59	391.763	0.181743	5
Ddx1	1789.24	1174.89	1129.57	1065.36	1289.77	336	0.260512	5
Ddx3x	9292.87	8130.55	8256.6	7382.98	8265.75	785.839	0.0950717	6
Decr1	475.403	582.318	667.859	748.799	618.595	117.189	0.189444	2
Des	1053.53	250.7	606.001	2220	1032.56	857.072	0.830047	3
Dhcr7	861.696	1982.85	1977.57	885.186	1426.82	639.068	0.447895	1
Dhrs1	567.344	837.265	873.097	640.326	729.508	148.862	0.204059	1
Dlat	640.948	626.309	561.264	560.085	597.152	42.5446	0.0712458	6
Dld	2165.18	2218.66	2302.04	2436.84	2280.68	118.361	0.051897	6
Dlg1	1282.06	1156.61	1088.78	1005.19	1133.16	117.004	0.103254	5
Dlst	2337.23	1782.15	1658.81	1632.02	1852.55	329.668	0.177953	5
Dmd	7130.75	11159.2	11746.1	5785.78	8955.46	2945.09	0.328859	1
Dnaja1	3871.03	2658.35	2315.94	2520.76	2841.52	700.613	0.246563	5
Dnaja2	2120.58	1899.74	1566.24	1744.87	1832.86	235.289	0.128373	5
Dnajb11	1488.98	1268.08	1165.48	914.87	1209.35	238.249	0.197005	5
Dnajb4	670.33	845.959	1023.16	1410.28	987.433	316.568	0.320597	3
Dnm1	915.39	891.535	1928.62	1557.72	1323.32	507.994	0.38388	2
Dnm1l	683.322	571.221	554.907	480.228	572.42	83.8784	0.146533	5
Dnm2	1123.15	1387.17	1339.19	1273.84	1280.83	114.931	0.0897311	6
Dnm3	208.554	91.8279	125.511	208.334	158.557	59.2235	0.373516	4
Dnpep	870.675	814.453	840.668	1142.38	917.044	151.969	0.165716	3
Dpysl2	1577.47	1962	2234.06	1989.66	1940.8	271.323	0.1398	2
Dpysl3	820.516	504.564	364.205	160.911	462.549	277.226	0.599344	5
Dpysl4	71.0945	33.2516	31.8232	45.9907	45.54	18.1878	0.399382	4
Dpysl5	889.076	1061.44	448.383	291.703	672.65	362.13	0.538363	5
Drp2	68.1011	8426.05	30916.4	29561	17242.9	15399.2	0.893078	2
Dsp	74.6451	14.1059	49.1103	38.6273	44.1221	25.0845	0.568525	4
Dstn	5569.87	5830.82	6591.47	8823.82	6703.99	1478.17	0.220491	3
Dusp15	140.537	10949.4	11489.7	10083.5	8165.77	5381.41	0.659021	1
Dusp3	2266.05	2222	2547.07	2763.53	2449.66	253.998	0.103687	3
Dync1h1	4661.39	5662.86	6231.38	5593.11	5537.18	650.087	0.117404	1
Dync1i2	3281.39	2447.64	2632.05	2775.58	2784.17	357.626	0.12845	4
Dync1li1	510.218	548.733	460.074	440.332	489.839	49.0599	0.100155	5
Dync1li2	4455.54	3976.37	4120.88	3676.63	4057.35	323.573	0.0797497	6
Dynll1	4371.78	5312.91	4141.67	4465.17	4572.88	511.74	0.111908	1
Dynll2	1624	1487.69	1957.77	2589.81	1914.82	491.418	0.25664	3
Ech1	499.765	841.776	1171.58	1695.11	1052.06	508.937	0.483754	2
Echs1	409.718	409.507	564.609	729.36	528.298	152.662	0.288969	3
Eci1	441.369	784.464	697.815	707.466	657.779	149.392	0.227116	1
Eef1a1	45286.7	38300.5	32721.3	38211.9	38630.1	5148.05	0.133265	4
Eef1a2	72.6337	23.0489	36.7741	489.524	155.495	223.665	1.4384	3
Eef1d	1967.06	1438.02	1326.72	1419.74	1537.88	290.236	0.188724	5
Eef1g	9822.82	7485.74	6493.63	6590.2	7598.1	1548.95	0.20386	5
Eef2	21407.6	22725.2	22483.8	23127.9	22436.1	735.351	0.0327753	6
Ehd1	2131.34	1187.77	1436.26	1784.63	1635	411.604	0.251745	4
Ehd2	1875.11	1591.83	2131.27	3126.23	2181.11	667.493	0.306033	3
Ehd3	365.733	612.507	537.225	404.981	480.111	114.772	0.239053	1
Ehd4	2243.86	2869.41	3043.37	4580.86	3184.38	992.271	0.311606	3
Eif2s1	1593.24	914.566	797.237	860.665	1041.43	370.989	0.356231	5
Eif3b	2389.74	2036.9	1613.4	1564.11	1901.04	388.821	0.204531	5
Eif4a1	9221.16	6119.36	3761.39	3764.42	5716.58	2587.02	0.452547	5
Eif4a2	5779.64	4509.82	6417.45	8015.3	6180.55	1457.68	0.235849	3
Eif4h	5095.14	4383.61	4072.03	4216.44	4441.8	453.782	0.102162	5
Eif5a	5828.52	4002.16	3401.23	3703.28	4233.8	1091.09	0.257709	5
Elovl1	3008.57	6701.82	6499.02	4731.31	5235.18	1728.2	0.330112	1
Emc1	1516.62	1188.43	1229.51	1349.49	1321.01	147.223	0.111447	4
Eml1	1139.62	1206.26	1628.49	826.835	1200.3	329.92	0.274864	1
Eno1	2304.69	1540.42	1472.49	1758.21	1768.95	377.379	0.213335	4
Eno2	53.2534	68.0756	133.23	184.274	109.708	60.6458	0.552792	2
Eno3	664.302	149.783	193.783	2829.75	959.404	1268.45	1.32213	3
Entpd2	4775.07	2781.59	4227.02	5426.12	4302.45	1126.16	0.261748	3
Epb41l2	5686.89	8800.54	10631.7	4412.97	7383.03	2843.8	0.38518	1
Epb41l3	6350.61	2060.3	1748.75	1719.41	2969.77	2259.16	0.760722	5
Ephx1	234.184	270.385	682.066	1214.7	600.334	457.186	0.761553	3
Eprs	3850.83	3370.3	2860.02	2158.1	3059.82	724.595	0.23681	5
Erlin2	1073.61	997.649	1093.85	878.047	1010.79	97.7059	0.0966629	6
Erp29	1445.4	1134.37	1178.22	1172.55	1232.64	143.173	0.116152	4
Esyt1	1702.91	1018.67	1048.97	2058.88	1457.36	510.344	0.350184	3
Etf1	1886.68	1272.99	1155.08	1298.83	1403.39	328.212	0.23387	4
Etfa	1042.86	929.248	1082.38	1279.48	1083.49	145.894	0.134651	3
Etfb	376.31	654.427	583.319	665.159	569.804	134.01	0.235186	2
Etfdh	723.53	765.454	794.351	881.664	791.25	66.922	0.0845776	6
Ezr	1570.08	3329.87	2281.77	1165.18	2086.73	948.616	0.454595	1
F13a1	2101.18	267.847	526.567	2899.06	1448.66	1261.48	0.870791	3
Fabp4	1419.17	2098.08	3236.45	16485	5809.68	7156.28	1.23179	3
Fabp5	7053.83	2211.72	1470.57	735.166	2867.82	2855.04	0.995541	5
Fam129a	1071.92	640.167	713.914	455.759	720.44	258.252	0.358464	5
Fam129b	1717.93	1570.51	1935.18	2878.04	2025.41	587.817	0.290221	3
Fam177a1	44.8752	142.711	154.992	93.477	109.014	50.3476	0.461846	1
Fam213a	166.671	304.072	344.723	489.462	326.232	132.836	0.407183	2
Fam49b	1203.64	1339.38	1365.78	1133.87	1260.67	110.416	0.0875854	6
Far1	2557.9	3464.97	4017.39	3317.36	3339.4	601.85	0.180227	1
Fasn	3431.36	10044.5	12015.7	7214	8176.38	3726.98	0.455823	1
Fbn1	11994.8	8073.46	12092.2	11397.1	10889.4	1902.28	0.174691	4
Fbxo2	0.230948	0.705356	9.98523	21.1976	8.02979	9.86044	1.22798	3
Fdft1	2102.35	6678.55	8033.53	5084.78	5474.8	2550.93	0.465939	1
Fdps	2179.66	6075.84	5556.84	2990.85	4200.8	1906.44	0.453829	1
Fermt2	10841.9	7363.77	7198.55	6287.65	7922.95	2002.64	0.252764	5
Fgg	1.68983	0.68111	0.91202	7.879	2.79049	3.41967	1.22547	3
Fh	879.158	554.675	494.03	654.355	645.554	169.181	0.262071	4
Fhl1	3651.12	1898.25	2966.81	2759.54	2818.93	722.401	0.256268	4
Fis1	623.537	912.985	1229.3	1352.19	1029.5	327.836	0.318441	2
Fkbp1a	7240.97	6733.31	9367.28	7627.1	7742.17	1143.57	0.147706	2
Fkbp3	2041.87	2224.54	2307.05	2438.34	2252.95	165.988	0.073676	6
Flna	13666.4	8546.88	8364.3	8718.81	9824.09	2565.62	0.261156	5
Flnb	2923.13	4543.93	8178.06	6338.11	5495.81	2267.8	0.412641	2
Flnc	3049.14	1169.77	906.546	635.236	1440.17	1094.62	0.760061	5
Flot1	629.607	921.407	1452.77	1956.64	1240.11	586.777	0.473167	2
Flot2	1203.94	1038.88	1305.44	1609.28	1289.38	239.893	0.186052	3
Fmnl2	948.82	1976.11	2052.43	1046.44	1505.95	589.131	0.391202	1
Fn1	33792.8	23432.2	27661.7	24597.2	27371	4638	0.16945	5
Fn3krp	753.524	621.558	860.824	1015.31	812.803	166.736	0.205137	3
Fscn1	319.339	632.067	644.899	378.874	493.795	168.911	0.342068	1
Fut8	881.342	6319.11	8284.78	6162.06	5411.82	3170.97	0.585934	1
G6pd	1300.55	1084.06	1489.81	2211.95	1521.59	489.183	0.321494	3
Gamt	634.325	837.919	768.458	480.733	680.359	157.646	0.231709	1
Ganab	6262.15	6504.42	6155.34	4172.23	5773.53	1077.48	0.186624	5
Gapdhs	2.8976	6.28249	5.21378	4.75976	4.78841	1.41294	0.295075	1
Gars	1702.72	1366.22	1263.12	1013.83	1336.47	285.482	0.213609	5
Gatm	902.156	5319.41	9426.88	6287.1	5483.89	3521.91	0.64223	2
Gclm	490.912	251.957	284.4	343.005	342.568	105.83	0.308932	4
Gdi1	4853.79	5902.9	7436.74	6372.17	6141.4	1071.75	0.174513	2
Gdi2	6581.01	5555.23	5375.91	5641.57	5788.43	539.847	0.0932632	6
Gfap	149.614	76.814	662.241	1604.7	623.341	704.197	1.12971	3
Gfpt1	2639.38	2285.51	2734.14	2371.55	2507.64	213.32	0.0850678	6
Gjb1	10.789	1104.28	1936.58	1328.56	1095.05	803.825	0.734052	2
Gjc3	434.773	2609.96	884.497	72.8119	1000.51	1123.16	1.12259	1
Glg1	4784.52	4587.33	4673.39	3661.54	4426.69	516.449	0.116667	5
Glipr2	503.123	176.891	173.547	177.591	257.788	163.566	0.634499	5
Glod4	839.957	1409.37	3421.99	2497.4	2042.18	1148.46	0.562371	2
Glrx3	1239.53	972.066	846.063	911.839	992.375	172.619	0.173945	5
Glud1	2635.16	2139.87	2937.71	4179.56	2973.07	868.958	0.292276	3
Glul	2960.69	4826.36	10927.9	11278.6	7498.38	4234.06	0.564664	2
Gmfb	258.43	301.834	319.571	158.63	259.616	72.057	0.277552	1
Gna11	328.657	421.577	366.625	337.308	363.541	41.9633	0.115429	1
Gna13	1167.45	985.4	1023.14	1190.71	1091.68	102.537	0.093926	6
Gnai1	576.785	1021.61	1077.98	776.124	863.125	231.546	0.268265	1
Gnai2	6701.29	5267.97	5409.17	7656.37	6258.7	1133.23	0.181065	3
Gnai3	5325.17	5498.09	5083.08	4005.53	4977.97	670.264	0.134646	5
Gnao1	77.3613	91.1718	121.387	139.125	107.261	28.0933	0.261915	2
Gnaq	367.668	554.425	455.694	226.871	401.164	138.999	0.34649	1
Gnas	9798.49	5704.79	5211.16	4571.58	6321.51	2363.95	0.373954	5
Gnb1	5176.5	4010.32	4406.21	4390.73	4495.94	489.254	0.108821	4
Gnb2	3015.7	3022.51	2173.92	2283.78	2623.98	458.459	0.174719	5
Gnb4	640.407	545.833	441.371	221.94	462.388	179.732	0.388704	5
Gng12	384.014	294.664	303.666	338.01	330.088	40.5123	0.122732	4
Gng2	1760.48	7654.38	11221.1	6268.32	6726.08	3912.97	0.581761	1
Gng3	62.2533	52.8468	72.1523	86.4692	68.4304	14.3789	0.210124	3
Got2	1749.46	1452.22	1470.6	1889.55	1640.46	214.641	0.130842	3
Gpd1	141.807	1622.85	2708.13	6136.52	2652.33	2549.86	0.961365	3
Gpd1l	717.057	844.188	984.084	1345.91	972.809	271.589	0.27918	3
Gpd2	229.172	292.532	173.33	211.75	226.696	49.7052	0.219259	5
Gpi	2082.94	2494.67	3124.95	3187.06	2722.4	528.749	0.194221	2
Gpx1	1838.51	647.024	738.446	1957.16	1295.29	698.447	0.539223	4
Gpx3	428.567	729.908	1118.95	12325.7	3650.79	5790.2	1.58601	3
Gpx4	1007.73	1272.07	1406.14	2071.6	1439.38	452.816	0.31459	3
Gpx7	1552.33	1176.15	1245.11	641.899	1153.87	378.463	0.327994	5
Gsk3b	287.107	423.246	417.828	170.195	324.594	120.65	0.371695	1
Gsn	1995.42	2285.94	9232.47	119181	33173.7	57435.7	1.73136	3
Gstk1	201.895	183.267	214.697	284.694	221.138	44.2923	0.200292	3
Gstm1	500.896	343.125	472.488	895.615	553.031	238.488	0.431238	3
Gstm2	407.112	452.184	1102.02	2447.57	1102.22	951.434	0.863198	3
Gstm3	350.341	331.884	383.109	766.807	458.035	206.935	0.451788	3
Gstp1	689.412	773.624	851.664	2235.83	1137.63	735.125	0.646188	3
Gypc	745.299	2105.28	1177.1	818.147	1211.46	625.057	0.515956	1
Hadh	1016.19	1279.56	1842.31	1570.9	1427.24	357.626	0.250572	2
Hadha	2356.38	2415.74	2493.36	2496.95	2440.61	67.5036	0.0276585	6
Hadhb	2332.93	1953.89	2373.83	2621.69	2320.59	275.749	0.118827	3
Hagh	214.403	330.218	368.347	358.368	317.834	70.8186	0.222816	2
Hdlbp	11094.6	8671.3	8099.19	5613.55	8369.66	2249.86	0.268811	5
Hepacam	198.231	497.7	707.58	705.842	527.338	240.514	0.45609	2
Hibadh	699.361	833.224	1203.07	1586.19	1080.46	398.815	0.369115	2
Hibch	320.491	395.022	510.596	546.537	443.161	104.242	0.235225	2
Hint1	1192.47	1225.16	1029.72	1059.95	1126.83	96.4043	0.0855538	6
Hist1h1a	3.73939	0.526848	0.276987	0.219818	1.19076	1.70431	1.43128	5
Hist1h1b	3.85337	2.05277	0.649835	0.805027	1.84025	1.48173	0.80518	5
Hist1h1e	5.68958	1.73697	2.10103	1.6626	2.79754	1.93752	0.692577	5
Hist1h3a	5.61306	5.21237	0.524369	1.7477	3.27437	2.52445	0.770972	5
Hist1h3b	5.8133	0.856725	0.524369	0.172604	1.84175	2.66239	1.44558	5
Hk1	811.155	917.476	1442.98	1599.84	1192.86	387.181	0.324582	2
Hmgb1	6982.6	4229.17	3496.28	3441.87	4537.48	1669.15	0.367857	5
Hmgcs1	5924.02	35463.9	53238.4	30853.6	31370	19517.1	0.622159	1
Hnrnpa2b1	9529.28	6086.85	4580.07	3850.42	6011.65	2523.21	0.419719	5
Hnrnpa3	1558.27	922.672	771.46	537.212	947.402	437.027	0.461289	5
Hnrnpd	4438.57	2234.13	1338.38	1228.54	2309.9	1488.87	0.644558	5
Hnrnpk	8284.79	7203.81	5617.05	5654.09	6689.93	1295.08	0.193586	5
Hpcal1	400.467	198.699	170.69	368.145	284.5	116.561	0.409703	4
Hras	471.816	542.542	614.04	606.98	558.845	66.341	0.118711	2
Hsd17b10	589.946	650.912	803.373	941.166	746.349	157.877	0.211532	2
Hsd17b11	884.451	2563.62	4268.05	3432.42	2787.14	1446.8	0.519099	2
Hsd17b12	1538.09	1766.1	1932.82	2317.42	1888.61	328.484	0.173929	2
Hsd17b4	1372.56	1528.16	1945.31	2112.13	1739.54	346.66	0.199282	2
Hsd17b7	329.817	1405.39	1136.7	590.589	865.624	492.465	0.568914	1
Hsp90aa1	29.6528	37.5699	23.8633	2.66473	23.4377	14.9448	0.637641	5
Hsp90ab1	25276.2	20126.1	18342.5	17431.3	20294	3504.96	0.172709	5
Hsp90b1	17847.4	9661.13	11284.1	10803.4	12399	3695.49	0.298047	4
Hspa12a	3363.83	5509.8	7443.31	5813.13	5532.52	1676.67	0.303057	2
Hspa12b	439.115	317.238	314.551	483.193	388.524	85.7814	0.220788	4
Hspa1a	2.61995	42.721	96.4206	53.8196	48.8953	38.5678	0.788784	2
Hspa1l	10.126	9.37994	11.1775	26.234	14.2294	8.03701	0.564818	3
Hspa2	829.309	1525.86	4889.4	6679.76	3481.08	2773.07	0.796611	2
Hspa5	18738.6	9655.1	8604.6	9467.92	11616.6	4770.03	0.410623	5
Hspa8	239.444	16.5944	13.024	41.7462	77.7021	108.583	1.39742	4
Hspa9	2616.67	2685.24	2589.1	2579.8	2617.7	47.6678	0.0182098	6
Hspb1	259.253	132.669	204.22	759.388	338.882	285.087	0.841257	3
Hspd1	5662.58	2948.08	2723.36	2562.59	3474.15	1467.49	0.422403	5
Idh1	1989.66	1909.83	1686.77	1922.83	1877.27	131.729	0.0701705	6
Idh2	3049.59	1658.21	1105.5	1104.29	1729.4	917.965	0.5308	5
Idh3a	1372.02	1565.09	1537.02	1546.03	1505.04	89.4472	0.0594317	6
Idh3g	1033.83	902.533	884.439	1199.5	1005.08	145.714	0.144978	3
Idi1	2027.41	7538.35	9912.04	4888.57	6091.59	3398.71	0.557935	1
Ikbip	1486.93	1100.84	1038.27	771.614	1099.41	295.161	0.268471	5
Ilk	4160.09	2930.78	2865.24	2577.55	3133.41	701.437	0.223857	5
Immt	1667.56	1448.69	1219.24	1267.59	1400.77	203.441	0.145235	5
Ina	47.1233	3.39363	3.26753	8.65338	15.6095	21.1586	1.3555	4
Ipo5	2597.86	1570.31	1524.19	1568.75	1815.28	522.161	0.287648	5
Iqgap1	4233.91	2446.08	2470.13	2369.83	2879.99	903.627	0.313761	5
Islr	2765.24	1596.75	2679.49	1939.4	2245.22	569.517	0.253657	5
Isoc1	126.241	108.624	114.308	63.2855	103.114	27.5489	0.267168	5
Ist1	1753.03	2059.45	2209.19	1915.39	1984.26	195.327	0.098438	6
Itga6	14557.8	27594.7	31067.9	16947.8	22542	8026.28	0.356058	1
Itgav	835.13	529.097	769.241	496.034	657.375	169.899	0.258451	5
Itgb1	16767.7	13928.2	14294.4	10557.8	13887	2552.76	0.183823	5
Itgb4	3200.95	6047.79	14210.5	17120	10144.8	6587.52	0.649348	2
Itpr3	2580.21	8749.21	9483.52	4658.97	6367.98	3298.72	0.518018	1
Ivd	520.74	640.6	764.292	1104.82	757.612	251.924	0.332523	3
Jam3	1153.26	1834.1	2458.51	2417.62	1965.87	612.23	0.311429	2
Jup	954.81	1082.16	1344.11	1216.81	1149.47	168.169	0.146301	2
Kif5a	3968.07	899.91	270.136	680.479	1454.65	1695.82	1.16579	5
Kif5b	2476.42	3640.2	4540.17	2057.49	3178.57	1127.96	0.354864	1
Kif5c	1077.25	491.87	290.522	302.221	540.466	369.564	0.683787	5
Kit	210.034	311.777	259.482	321.078	275.593	51.432	0.186623	2
Klc1	1888.06	2041.33	2229.83	2099.62	2064.71	141.699	0.0686289	6
Klc2	335.186	457.416	477.995	437.265	426.966	63.4056	0.148503	1
Kpna4	920.651	625.739	677.976	691.6	728.991	130.888	0.179547	4
Kpnb1	9538.79	5167.58	4608.1	3677.74	5748.05	2600.79	0.452465	5
Kras	799.262	846.007	801.589	564.904	752.94	127.19	0.168924	5
Lama2	11937.4	15559.3	12948.1	5135	11395	4443.55	0.389957	1
Lama4	17757.1	10383.9	7253.08	3536.93	9732.74	6037.4	0.620319	5
Lamb1	24666.6	26689.2	22338.1	8212.68	20476.7	8367.03	0.408613	5
Lamb2	3960.56	5002.66	9303.46	10113.9	7095.16	3065.61	0.432071	2
Lamc1	14666.1	13732.6	12047.2	4463.28	11227.3	4637.75	0.413078	5
Lamp1	5482.48	8464.23	11957	15417.8	10330.4	4301.66	0.416408	2
Lamp2	1860.08	3060.09	5198.44	5701.13	3954.93	1805.98	0.456639	2
Lancl1	980.526	1134.73	1297.57	1287.01	1174.96	149.455	0.1272	2
Lap3	1312.42	1136.24	1300.42	1744.18	1373.31	259.978	0.189307	3
Lasp1	7578.44	3643.95	3825.18	4070.3	4779.47	1874.14	0.392124	4
Lcp1	557.739	584.572	458.697	1336.3	734.327	404.949	0.551457	3
Ldha	6858.33	3933.49	4132.49	6129.47	5263.44	1453.9	0.276226	4
Ldhb	1488.09	3666.35	5393.42	4946.01	3873.47	1750.57	0.45194	2
Letm1	345.966	516.754	524.287	362.65	437.414	96.2535	0.220051	1
Limch1	865.351	2103.82	6060.92	3292.78	3080.72	2220.26	0.720697	2
Lin7c	293.828	456.558	343.322	250.515	336.056	88.8331	0.26434	1
Lman2	1006.85	839.517	774.298	931.614	888.069	102.152	0.115027	4
Lmna	4018.4	4306.18	3600.6	4005.68	3982.71	290.082	0.0728354	6
Lpp	11.8171	12.3037	8.42517	8.15392	10.175	2.18897	0.215132	5
Lrrc57	514.389	502.02	539.918	571.941	532.067	30.913	0.0580999	6
Lrrc59	3908.42	2725.35	1850.71	1449.06	2483.38	1089.25	0.438614	5
Lss	1189.36	7092.41	9427.24	3489.96	5299.74	3670.62	0.692604	1
Lum	16306	11561.3	18961.8	9395.8	14056.2	4361.59	0.310296	5
Lxn	383.474	234.208	299.199	333.689	312.642	62.6972	0.20054	4
Lypla2	240.107	267.02	214.003	298.958	255.022	36.4203	0.142813	3
Lyz2	1784.82	1655.53	2407.43	6396.73	3061.13	2247.83	0.734314	3
M6pr	0.388278	6.17801	10.3311	0.582565	4.36999	4.79592	1.09747	1
Macrod1	22.3777	26.2348	25.1528	113.351	46.779	44.4109	0.949377	3
Mag	573.433	9004.42	6783.38	2378.5	4684.93	3885.25	0.829307	1
Maoa	695.098	1018.09	2169.37	2368.22	1562.69	829.909	0.531076	2
Map1a	1061.67	921.2	1411.16	1297.86	1172.97	222.191	0.189426	2
Map1b	3797.69	4122.93	5849.87	3649.48	4354.99	1016.01	0.233298	1
Map1lc3a	890.663	928.704	1354.83	1530.42	1176.15	316.317	0.268941	2
Map1lc3b	562.518	715.812	782.53	938.299	749.79	155.813	0.207809	2
Map2k4	202.29	197.913	192.479	194.272	196.739	4.33673	0.0220431	6
Map4	13096	16592	19220.7	14022.3	15732.7	2755.71	0.175158	1
Map6	199.484	340.818	354.659	280.077	293.76	70.7067	0.240696	1
Mapk1	1013.27	785.223	684.454	637.38	780.082	167.244	0.214393	5
Mapk3	2692.92	4147.09	7160.59	7587.82	5397.11	2365.32	0.438258	2
Mapre1	3812.36	2403.42	1738.54	1515.02	2367.34	1034.61	0.437034	5
Mapre3	440.036	2060.02	2428.09	1520.36	1612.13	865.761	0.53703	1
Mapt	186.018	193.651	279.826	392.03	262.881	96.0334	0.365311	3
Marc2	347.154	611.933	754.359	714.411	606.964	183.299	0.301994	2
Marcks	30236.8	17115.9	7581.36	5729.41	15165.9	11217.7	0.739665	5
Mat2a	4553.94	3178.09	3625.26	4591.66	3987.24	700.529	0.175693	4
Mbp	10383.7	283157	379325	159518	208096	159587	0.76689	1
Mcam	14721.8	10488.9	5403.84	4743.44	8839.5	4686.99	0.530232	5
Mcts1	354.339	317.511	288.736	362.555	330.785	34.1977	0.103383	4
Mdh1	2207.66	1811.35	1915.75	2657.49	2148.06	378.776	0.176334	3
Mdh2	1833.87	1721.63	1546.35	1686.4	1697.06	118.53	0.0698445	6
Mdp1	292.83	298.221	311.041	309.597	302.923	8.83971	0.0291814	6
Me1	709.527	348.814	1057.23	1896.03	1002.9	661.949	0.660035	3
Mgll	148.015	1739.62	5638.66	4686.03	3053.08	2550.57	0.83541	2
Mgst3	296.105	587.568	709.038	614.286	551.749	178.221	0.32301	2
Mical1	1420.63	2789.33	2408.68	1703.05	2080.42	629.297	0.302485	1
Mlec	2510.47	2279.24	3062.66	2185.81	2509.54	393.184	0.156675	1
Mme	359.364	4878.24	3516.15	776.36	2382.53	2174.6	0.912728	1
Mpc1	709.504	1221.33	1791.29	1826.7	1387.21	530.168	0.382184	2
Mpp2	37.0209	47.442	49.4038	49.8943	45.9403	6.03988	0.131472	2
Mpp6	541.378	4372.87	2399.65	644.157	1989.51	1803.3	0.906403	1
Mpst	293.547	452.481	468.514	518.949	433.373	97.4242	0.224805	2
Mpz	31504	1.26597e+06	1.95962e+06	894755	1.03796e+06	803099	0.773726	1
Mrc1	1178.81	764.028	711.811	1963.93	1154.65	578.566	0.501076	3
Mrps36	340.905	386.64	365.628	372.917	366.522	19.1714	0.0523063	6
Msn	7550.23	6471.5	7277.09	7763.41	7265.56	565.553	0.0778403	6
Mtch2	796.64	707.541	662.295	724.027	722.626	55.8191	0.0772448	6
Mthfd1	535.469	422.658	439.172	416.337	453.409	55.5471	0.12251	5
Mtmr2	1659.22	2548.12	2472.34	1902.13	2145.45	433.83	0.202209	1
Mvk	194.32	562.372	506.243	310.976	393.478	170.989	0.434558	1
Myadm	7111.19	2630.38	2666.61	2637.99	3761.54	2233.16	0.593681	5
Myh10	3387.46	2028.44	1338.62	649.958	1851.12	1168.65	0.631321	5
Myh11	936.982	525.564	2227.89	3854.12	1886.14	1499.09	0.794793	3
Myh14	655.165	2673.21	3217.08	2201.05	2186.63	1102.15	0.504039	1
Myh4	708.683	94.096	665.812	20798.8	5566.85	10158.5	1.82482	3
Myh9	2760.32	3449.85	3868.95	3834.69	3478.45	515.083	0.148078	2
Myl12b	1950.41	2193.93	2292.33	2685.23	2280.47	305.726	0.134062	3
Myl6	7151.41	6538.48	8125.32	9628.6	7860.95	1347.45	0.171411	3
Myl9	2063.18	1499.52	1988.04	2570.62	2030.34	438.384	0.215916	3
Myo18a	794.241	1334.18	1701.8	1340.72	1292.74	374.099	0.289386	1
Myo1b	775.85	1387.98	3329.11	2356.58	1962.38	1119.69	0.570578	2
Myo1c	2315.74	2525.56	3162	3582.54	2896.46	581.956	0.20092	2
Naga	593.724	808.737	907.495	789.245	774.8	131.348	0.169525	1
Nap1l1	6229.63	2847.66	2531.26	2885.1	3623.41	1744.71	0.481511	5
Nap1l4	2439.91	1919.34	2021.46	1941.3	2080.5	243.592	0.117083	5
Napa	852.748	924.027	879.912	1054	927.673	89.1957	0.09615	6
Napb	21.9356	28.6343	22.2178	21.1478	23.4839	3.46334	0.147477	1
Naxd	185.348	227.816	218.456	226.637	214.564	19.9171	0.0928258	6
Ncam1	4280.6	1253.45	825.69	806.525	1791.57	1672.13	0.933336	5
Ncdn	366.392	533.013	502.233	555.852	489.373	84.8798	0.173446	2
Nckap1	3316.05	3143.05	3440.51	3221.09	3280.17	128.177	0.0390764	6
Ncl	7076.33	5434.83	4402.94	3463.26	5094.34	1547.32	0.303734	5
Ncmap	1.23426	2411.13	4802.35	2998.67	2553.35	1982.41	0.776396	2
Ndrg1	2472.12	15428.7	36391.5	46490.9	25195.8	19921.4	0.790663	2
Ndrg2	2205.23	3380.13	5958.26	7172.8	4679.1	2284.89	0.488318	2
Ndrg4	646.163	822.979	1379.01	1036.27	971.105	315.258	0.324639	2
Ndufa12	480.5	313.122	276.492	435.801	376.479	97.2129	0.258216	4
Ndufa13	291.93	435.043	473.171	545.142	436.322	106.537	0.244171	2
Ndufa2	569.671	510.663	492.417	562.755	533.876	38.1794	0.0715136	6
Ndufa3	240.726	187.908	178.569	232.852	210.014	31.3169	0.149118	4
Ndufa4	1561.05	1153.41	1019.4	1336.77	1267.66	234.903	0.185305	4
Ndufa5	496.917	426.786	508.619	726.691	539.753	129.758	0.240403	3
Ndufa6	482.743	586.968	538.203	824.909	608.206	150.613	0.247635	3
Ndufa7	276.415	374.097	394.362	505.88	387.689	94.1283	0.242794	2
Ndufa8	520.217	500.535	509.952	636.137	541.71	63.4624	0.117152	3
Ndufa9	832.421	817.753	732.053	826.838	802.266	47.1977	0.0588305	6
Ndufb10	606.377	571.004	565.846	771.199	628.606	96.7534	0.153917	3
Ndufb11	777.376	865.452	772.56	826.615	810.501	44.0306	0.0543251	6
Ndufb3	535.238	497.39	545.157	648.943	556.682	64.8594	0.116511	3
Ndufb4	422.657	574.688	581.29	691.452	567.522	110.432	0.194586	2
Ndufb6	245.667	244.143	205.901	268.287	241	25.8726	0.107355	3
Ndufb7	351.504	471.221	364.084	426.208	403.254	55.8532	0.138506	1
Ndufb8	1006.58	1056.45	1017.75	1117.03	1049.45	49.8638	0.0475141	6
Ndufc2	402.484	436.135	348.988	540.864	432.118	80.8921	0.187199	3
Ndufs1	1560.12	1172.03	1324.21	1447.52	1375.97	166.635	0.121104	4
Ndufs2	1654.38	1868.87	1579.59	1763.34	1716.54	126.51	0.0737006	6
Ndufs3	586.561	714.545	659.257	722.326	670.672	62.711	0.0935046	6
Ndufs4	1049.03	1291.8	1405.03	1386.4	1283.07	163.708	0.127591	2
Ndufs7	115.303	229.323	205.578	324.306	218.628	85.8849	0.392837	2
Ndufs8	328.641	417.989	403.295	365.152	378.769	40.1579	0.106022	1
Ndufv1	864.226	958.29	792.89	961.979	894.346	81.3707	0.0909835	6
Ndufv2	905.607	1353.71	1589.77	1495.09	1336.04	302.906	0.226719	2
Nedd4	28171.1	18237.5	16466.8	15520.2	19598.9	5824.72	0.297197	5
Nefh	76.7819	89.9213	50.6768	26.6158	60.999	28.1327	0.4612	5
Nefl	482.68	2106.19	274.376	266.889	782.535	888.088	1.13489	1
Nefm	336.297	1951.51	223.697	140.603	663.028	862.726	1.30119	1
Nes	6327.62	8393.29	15340.9	14590.8	11163.2	4481.71	0.401473	2
Nfasc	27.6231	5964.21	10148.3	6302	5610.52	4177.84	0.744644	2
Nid1	30339.7	22631.7	32899.2	12964	24708.6	8963.68	0.362775	5
Nid2	8592.43	8639.56	5506.09	1665.24	6100.83	3300.57	0.541004	5
Nipsnap1	643.041	469.276	368.072	323.199	450.897	141.92	0.314751	5
Nipsnap3b	449.335	209.398	107.004	127.283	223.255	157.087	0.703622	5
Nme1	879.273	690.574	554.039	495.422	654.827	170.511	0.26039	5
Nme2	3449.34	2867.01	2579.97	2712.96	2902.32	383.077	0.13199	5
Nnt	2308.85	937.377	786.11	889.355	1230.42	721.715	0.586559	5
Npc2	2235.27	2346.77	3848.95	5712.09	3535.77	1626.81	0.460099	3
Npm1	8035.68	4055.96	2792.28	3198.22	4520.54	2401.91	0.531332	5
Nptn	2557.67	3128.13	4822.02	5751.42	4064.81	1479.51	0.363981	2
Nras	1434.15	1088.54	947.673	578.579	1012.24	354.052	0.349773	5
Nsdhl	1051.17	3748.81	6615.29	2719.25	3533.63	2335.86	0.661038	1
Nsf	919.211	855.736	765.417	651.459	797.956	116.278	0.145719	5
Nxn	996.512	719.076	759.143	756.157	807.722	127.173	0.157446	4
Ogn	7366.23	5427.85	7472.39	11677.4	7985.96	2634.28	0.329864	3
Ola1	938.732	655.904	524.411	550.531	667.394	189.611	0.284107	5
Opa1	565.298	699.08	768.412	573.886	651.669	98.9729	0.151876	1
Osbpl1a	1225.5	2163.03	2440.9	1374.78	1801.05	592.563	0.329009	1
Ostf1	494.758	963.158	1418.28	1273.32	1037.38	408.535	0.393814	2
Otub1	1020.16	819.651	742.52	630.936	803.317	164.011	0.204168	5
Oxct1	1954.78	1728.62	1683.69	1917.31	1821.1	134.859	0.0740538	6
Oxsr1	2219.56	1994.07	2065.75	2028.92	2077.08	99.3943	0.047853	6
P2rx7	2269.78	3833.24	1818.76	888.154	2202.48	1229.99	0.558454	1
P4hb	15483.5	10532.5	9234.34	7665.55	10729	3379.48	0.314986	5
Pa2g4	2630.22	1773.5	1212.01	954.455	1642.55	741.951	0.451708	5
Pabpc1	11459.1	6491.63	6156.16	5438.43	7386.32	2750.47	0.372374	5
Pacsin1	10.2989	2.92141	0.801356	3.48185	4.37588	4.11397	0.940147	4
Pacsin2	1933.37	1541.54	1903.14	2072.48	1862.63	226.409	0.121553	3
Pafah1b1	7565.48	8006.02	8649.84	7272.38	7873.43	599.024	0.0760817	6
Pafah1b2	1913.15	1334.22	1168.67	1311.8	1431.96	329.07	0.229803	5
Paics	1265.03	830.585	867.66	1180.14	1035.85	218.91	0.211333	4
Park7	994.746	1121.84	1218.71	1030.06	1091.34	100.397	0.0919948	6
Parva	5445.55	5695.09	5621.15	5137.92	5474.93	247.85	0.0452699	6
Pc	691.068	739.016	785.794	1650.28	966.541	457.467	0.473304	3
Pcbp2	2725.8	1842.8	1785.28	2028.26	2095.53	432.781	0.206525	4
Pcmt1	524.523	441.527	608.943	695.321	567.579	109.197	0.192391	3
Pcolce	4956.88	5284.03	8082.88	5874.25	6049.51	1407.73	0.232702	2
Pcyox1	1436.25	1546.46	1376.91	1134.6	1373.55	174.101	0.126752	5
Pdcd6ip	2357.45	2454.11	3220.69	2882.82	2728.77	399.598	0.146439	2
Pdha1	3089.84	2289.47	2850.74	3660.69	2972.68	568.255	0.191159	3
Pdhb	860.21	1129.52	1048.15	1057.66	1023.89	115.004	0.112321	1
Pdia3	14481.5	9597.26	8991.17	8528.81	10399.7	2756.14	0.265022	5
Pdia4	5169.88	2156.89	2116.47	2332.5	2943.94	1486.92	0.505081	4
Pdia6	9314.46	4764.41	4607.56	4527.54	5803.49	2342.71	0.403673	5
Pdlim5	191.64	126.644	197.769	214.245	182.574	38.4891	0.210813	3
Pebp1	2338.64	2537.85	3051.65	3733.08	2915.3	622.461	0.213515	3
Pfkl	382.497	364.076	354.398	429.941	382.728	33.5639	0.0876964	6
Pfkm	1348.04	1848.38	3896.23	4621.23	2928.47	1577.59	0.538707	2
Pfkp	118.369	68.1555	108.241	235.703	132.617	72.0631	0.543392	3
Pfn1	6671.6	3970.06	3358.67	3676.36	4419.18	1522.23	0.344461	5
Pgam1	4595.86	1996.55	2392.9	3023.1	3002.1	1143.5	0.380899	4
Pgam2	258.278	89.3009	122.51	1043.72	378.451	449.493	1.18772	3
Pgk1	3752.23	1794.41	1957.46	3065.38	2642.37	930.744	0.352238	4
Pgls	214.91	296.564	224.209	224.747	240.108	37.9075	0.157877	1
Pgrmc1	2607.39	2497.81	2869.32	3065.17	2759.92	256.331	0.0928762	6
Phb	502.486	546.933	586.793	643.339	569.888	59.8631	0.105044	2
Phb2	1700.69	1406.52	1136.06	978.293	1305.39	317.359	0.243114	5
Phgdh	2080.52	1389.25	1221.66	1466.84	1539.57	374.871	0.243491	4
Picalm	4883.32	4160.69	5088.22	5840.5	4993.18	690.916	0.138372	3
Pitpna	1520.86	1278.51	1523.53	1607.56	1482.62	141.9	0.0957091	6
Pitpnb	1210.5	1025.9	1029.26	1004.09	1067.44	96.0263	0.0899595	6
Pkm	2328.17	1339.2	1949.43	3382.87	2249.92	858.175	0.381425	3
Plcd1	986.79	918.173	663.626	689.932	814.63	161.98	0.198838	5
Plec	3818.87	6583.82	8309.81	7744.68	6614.29	1997.32	0.301971	2
Plekhb1	5756.76	16007.7	22310.8	21833.6	16477.2	7699.99	0.467312	2
Plg	27.6782	75.6945	50.6152	30.81	46.1995	22.1309	0.479029	1
Plin1	5.8091	488.234	997.617	3698.29	1297.49	1650.97	1.27244	3
Plin3	328.314	399.058	602.369	855.172	546.228	236.462	0.432901	3
Pllp	143.228	5100.81	8492.92	6966.19	5175.79	3630.48	0.701435	2
Plp1	7123.74	40650.1	36043.1	26475.8	27573.2	14856.3	0.538795	1
Pls3	1745.73	1064.67	1709.39	3035.77	1888.89	826.114	0.437354	3
Pmp2	2269.28	31621.7	81118.2	46605.2	40403.6	32799.8	0.811805	2
Pmp22	21913.8	383095	767064	383729	388950	304273	0.782294	1
Por	617.685	1023.29	1481.15	1362.81	1121.23	387.751	0.345826	2
Postn	38625.7	21966.8	13212	3838.6	19410.8	14794.9	0.762199	5
Ppa2	562.443	960.087	937.382	598.245	764.539	213.394	0.279114	1
Ppia	168.682	75.1776	79.5154	110.727	108.525	43.1173	0.397301	4
Ppib	6594.8	4391.87	3710.81	3455.01	4538.12	1426.99	0.314444	5
Ppic	3659.97	2267.4	1489.93	1034.62	2112.98	1150.08	0.544295	5
Ppid	608.388	324.368	304.125	335.583	393.116	144.104	0.366569	4
Ppp1ca	4455.89	3618.22	2681.51	2525.38	3320.25	897.826	0.270409	5
Ppp1cb	6572.55	4991.72	5610.05	6714.89	5972.3	817.414	0.136868	4
Ppp1cc	4926.99	4265.81	3822.2	3169.4	4046.1	740.039	0.182902	5
Ppp2r1a	3078.7	2621.42	2529.98	2520.96	2687.76	264.544	0.0984254	6
Ppp2r1b	907.983	577.076	409.522	624.04	629.655	207.14	0.328974	4
Ppp2r2a	1416.57	1221.74	1075.19	1279.32	1248.2	141.361	0.113252	4
Ppp3ca	959.349	985.888	947.206	898.659	947.775	36.5115	0.0385234	6
Prdx1	1522.4	1100.28	1309.59	1558.89	1372.79	212.346	0.154682	4
Prdx2	4500.63	2323.06	2284.84	1801.02	2727.39	1205.8	0.442109	5
Prdx3	1002.13	591.76	604.108	873.989	767.998	203.284	0.264694	4
Prdx4	2146.7	1314.35	1211	1105.97	1444.5	475.799	0.329386	5
Prdx5	362.702	524.241	635.896	843.422	591.565	201.914	0.341322	2
Prelp	1259.18	1685.67	6928.72	7648.67	4380.56	3375.36	0.770531	2
Prkaca	1870.6	940.322	879.365	912.952	1150.81	480.507	0.417538	5
Prkacb	150.768	168.645	209.75	131.475	165.16	33.3777	0.202094	1
Prkca	225.133	378.801	894.511	868.952	591.849	340.715	0.575679	2
Prkcd	1033.59	1137.51	1233.02	1010.7	1103.71	102.356	0.0927383	6
Prnp	6664.14	6493.22	8136.62	10964.7	8064.67	2069.32	0.256591	3
Prph	149.433	78.6077	61.3918	255.548	136.245	88.1893	0.647285	3
Prps1	688.126	485.922	494.217	507.996	544.065	96.4708	0.177315	4
Prx	2360.23	96848.3	132929	73289.4	76356.7	55091.5	0.721501	1
Psma1	1490.77	1233.21	1014.27	1093.75	1208	209.109	0.173103	5
Psma2	1249.97	1218.04	1228.77	1312.66	1252.36	42.333	0.0338027	6
Psma3	1794.83	1903.53	1800.15	1608.28	1776.7	122.926	0.0691879	6
Psma4	1850.95	1668.18	1720.32	1505.51	1686.24	142.921	0.0847569	6
Psma5	1273.29	1052.7	911.765	1007	1061.19	153.104	0.144276	5
Psma6	1642.55	1280.58	1162.63	1642.97	1432.18	247.878	0.173077	4
Psma7	1737.59	1863.25	1432.56	1335.12	1592.13	249.116	0.156467	5
Psmb1	1993.45	1937.78	1709.46	1937.68	1894.59	126.183	0.0666015	6
Psmb2	1052.04	898.103	701.356	758.381	852.469	156.628	0.183734	5
Psmb3	717.483	740.252	644.81	762.569	716.279	51.0777	0.0713098	6
Psmb4	1642.61	1671.24	1408.46	1685.69	1602	130.261	0.0813113	6
Psmb6	128.119	214.695	170.01	205.658	179.62	39.3824	0.219254	1
Psmc3	1644.19	2018.16	2096.17	1952.45	1927.74	197.95	0.102685	1
Psmc6	1262.13	1182.99	1193.6	1464.5	1275.81	130.594	0.102362	3
Psmd1	1997.52	1808.03	1686.04	1739.73	1807.83	135.957	0.0752044	6
Psmd13	1328.59	1273.74	1071.35	1082.54	1189.06	131.457	0.110556	5
Psmd5	867.167	604.554	555.16	584.797	652.92	144.267	0.220956	5
Psmd7	1471.32	1252.08	1174.56	1236.46	1283.61	129.542	0.10092	5
Psmf1	307.465	1201.32	1854.01	1653.8	1254.15	687.641	0.548293	2
Ptges3	5651.57	3353.28	3241.44	4403.93	4162.55	1122.32	0.269623	4
Ptpa	2542.21	2046.5	2077.97	2063.39	2182.52	240.137	0.110028	5
Ptpn11	3299.5	2965.01	2974.67	3135.77	3093.74	157.958	0.0510574	6
Pura	34.743	58.5884	56.7885	48.926	49.7615	10.8558	0.218157	1
Purb	378.863	361.162	350.407	375.799	366.558	13.2512	0.0361505	6
Pxn	2423.31	2911.39	3598.6	2813.94	2936.81	489.011	0.166511	1
Pygb	542.187	550.58	668.056	512.374	568.299	68.4953	0.120527	1
Pygm	518.247	83.6816	202.128	4422.93	1306.75	2085.54	1.59598	3
Rab10	3640.3	3395.25	3610.11	4032.64	3669.57	265.495	0.0723504	6
Rab11b	1376.93	1626.01	1781.02	2033.17	1704.28	275.281	0.161523	2
Rab12	232.816	228.926	277.678	294.546	258.491	32.6669	0.126375	2
Rab14	3579.31	3342.94	3301.19	3541.27	3441.18	139.456	0.0405257	6
Rab18	2048.24	1770.68	2103.81	2568.88	2122.9	331.107	0.155969	3
Rab21	523.737	612.26	852.048	952.71	735.189	200.661	0.272938	2
Rab22a	1088.37	1113.36	1131.7	909.482	1060.73	102.382	0.0965207	6
Rab2a	1071.45	1418.25	1723.1	1787.05	1499.96	327.879	0.218592	2
Rab2b	284.138	312.415	371.309	378.593	336.614	45.845	0.136195	2
Rab35	1032.1	934.598	947.258	1020.1	983.514	49.6876	0.0505205	6
Rab39a	72.8013	43.4224	56.6447	76.4171	62.3214	15.2525	0.244739	4
Rab3a	66.2825	104.17	158.595	142.879	117.982	41.3637	0.350594	2
Rab43	36.5418	73.6536	99.2014	87.3689	74.1914	27.1841	0.366405	2
Rab4b	239.022	406.783	500.707	415.51	390.506	109.517	0.280449	2
Rab5b	3938.5	3686.33	4862.21	5133.58	4405.15	700.947	0.15912	2
Rab5c	1769.55	2118.35	2158.13	2825.49	2217.88	441.086	0.198877	3
Rab6a	5061.78	4912.88	5745.38	5549.82	5317.46	394.191	0.0741314	6
Rab6b	408.046	216.927	267.555	388.085	320.153	92.6678	0.289448	4
Rab7a	4028.98	4453.46	5584.17	6611.64	5169.56	1164.08	0.225179	2
Rab8a	1168.72	954.434	879.737	1002.04	1001.23	122.481	0.12233	4
Rab8b	2426.58	2672.04	2837	2226.68	2540.58	268.747	0.105782	1
Rac1	7496.05	5777.38	6440.86	7591.74	6826.51	872.402	0.127796	4
Rack1	9036.5	6506.74	5270.5	6756.64	6892.6	1570.02	0.227783	4
Rala	817.294	823.264	860.824	954.563	863.986	63.3839	0.0733621	6
Ralb	946.926	579.966	552.98	641.041	680.228	181.574	0.266932	4
Ran	4610.31	2077.51	1182.3	1371.57	2310.42	1580.91	0.684253	5
Rap1a	5754.35	3650.1	3803.66	4157.95	4341.52	965.596	0.22241	4
Rap1b	1054.96	762	957.04	1004.88	944.72	128.206	0.135708	4
Rap2a	3594.66	4214.45	2931.75	1802.83	3135.92	1031.58	0.328956	5
Rap2b	45.0486	47.1579	34.8945	32.2596	39.8401	7.36211	0.184791	5
Rars	1070.33	863.201	700.865	691.98	831.593	177.552	0.213508	5
Rcn1	4875.86	4965.83	6543.96	4623.31	5252.24	873.269	0.166266	1
Rcn3	3901.87	3880.11	3665.95	2557.18	3501.28	638.337	0.182316	5
Rdh11	635.427	765.604	1157.79	889.143	861.99	222.75	0.258414	2
Rdx	823.313	906.135	650.981	562.664	735.773	156.889	0.21323	5
Reep5	2750.28	2756.69	3654.63	4119.98	3320.4	681.626	0.205285	2
Rer1	1337.2	1727.93	1969.98	1688.01	1680.78	260.739	0.15513	1
Rhoa	12361.3	9436.01	10906.6	12693.9	11349.5	1493.2	0.131566	4
Rhob	3438.16	2536.12	3496.79	4171.08	3410.54	671.126	0.19678	3
Rhoc	2542.03	1494.92	1434.7	1559.99	1757.91	525.241	0.298787	4
Rhog	850.755	715.355	744.135	950.149	815.098	107.23	0.131555	3
Rhot2	661.739	619.171	547.155	620.723	612.197	47.6311	0.0778036	6
Rida	81.1104	147.001	233.062	348.504	202.419	115.567	0.570926	2
Rpl10	7748.58	5427.94	4879.6	6923.05	6244.79	1323.18	0.211885	4
Rpl10a	445.913	184.972	166.072	180.089	244.262	134.673	0.551346	5
Rpl11	6077.88	4664.76	4161.81	5325.08	5057.38	830.521	0.16422	4
Rpl12	69.9613	146.626	79.2601	330.938	156.696	121.08	0.772703	3
Rpl13	15.6994	38.1281	8.37101	9.77783	17.9941	13.7932	0.766538	1
Rpl13a	4852.54	4267.12	4008.61	5280.03	4602.07	573.513	0.124621	3
Rpl14	4480.36	3933.13	3468.23	4062.4	3986.03	416.774	0.104559	4
Rpl15	2733.82	2667.73	2122.87	2605.31	2532.43	278.038	0.109791	4
Rpl17	5227.59	3488.33	2174.44	3666.19	3639.14	1250.6	0.343654	4
Rpl18	3316.47	3064.62	2340.08	3010.13	2932.82	417.085	0.142213	4
Rpl19	6011.23	5702.35	4982.18	6914.51	5902.57	800.63	0.135641	3
Rpl21	9511.69	7943.41	7410.13	9558.39	8605.91	1094.91	0.127227	4
Rpl22	1044.52	785.134	747.504	889.653	866.703	132.926	0.15337	4
Rpl23	4951.08	3650.72	3418.23	4415.27	4108.82	704.767	0.171525	4
Rpl23a	2248.75	1701.96	1503.54	2166.82	1905.27	360.141	0.189024	4
Rpl24	3501.32	2888.97	2409.66	3320.36	3030.08	486.88	0.160682	4
Rpl26	2896.89	2776.5	2236.02	3580.05	2872.36	552.435	0.192328	3
Rpl27	3006.6	2244.19	1903.13	2480.18	2408.52	463.773	0.192555	4
Rpl27a	1523.88	1162.69	849.893	1415.18	1237.91	299.677	0.242083	4
Rpl28	1679.18	1292.06	1172.29	1514.61	1414.54	226.372	0.160033	4
Rpl29	2964.74	3354.18	2424.76	3326.17	3017.46	433.113	0.143536	3
Rpl3	13898	10451.5	9290.07	11246.7	11221.6	1956.81	0.17438	4
Rpl30	5115.45	4847.18	5096.31	6479.08	5384.5	739.875	0.137408	3
Rpl31	1387.73	822.424	610.595	716.55	884.324	346.566	0.391899	5
Rpl32	9366.15	7389.74	6184.96	8471.34	7853.05	1374.64	0.175046	4
Rpl35	3164.36	2628.95	2241.76	3139.03	2793.53	442.875	0.158536	4
Rpl36	23.3359	31.752	14.0608	56.747	31.4739	18.3326	0.582469	3
Rpl4	13592.3	9967.57	9472.98	11727.2	11190	1871.02	0.167204	4
Rpl5	9010.47	6960.58	6456.06	8847.8	7818.73	1300.33	0.166309	4
Rpl6	1238.16	1240.54	935.29	1169.66	1145.91	144.209	0.125846	4
Rpl7	10769	8137.2	7061.16	9634.9	8900.57	1632.64	0.183431	4
Rpl7a	1961.42	1702.38	1451.09	1660.93	1693.96	209.51	0.123681	4
Rpl8	20.1165	19.5319	15.3503	9.55329	16.138	4.87599	0.302144	5
Rpl9	5288.13	3836.01	3449.95	5283.16	4464.32	961.4	0.215352	4
Rplp0	10720.5	11658.1	9272.75	11272.5	10731	1045.53	0.0974309	6
Rpn1	6582.52	3974.32	3905.38	3939.79	4600.5	1321.65	0.287283	5
Rpn2	6322.82	3556.66	3576.84	4653.76	4527.52	1301.97	0.287568	4
Rps10	626.271	166.322	145.113	180.879	279.646	231.549	0.828007	5
Rps11	6250.16	4539.32	4199.93	5588.04	5144.37	944.751	0.183648	4
Rps14	5676.94	4552.53	4199.48	7057.39	5371.58	1288.39	0.239853	3
Rps15	2500.56	3054.05	2274.15	3271.26	2775	465.587	0.167779	3
Rps15a	1968.37	1454.9	1214.86	1696.64	1583.69	323.192	0.204075	4
Rps16	6558.12	8116.92	7122.13	6283.17	7020.09	810.333	0.115431	1
Rps17	815.5	771.635	464.412	476.36	631.977	187.51	0.296704	5
Rps18	7805.18	8191.22	6472.84	7233.89	7425.79	747.164	0.100617	5
Rps19	184.463	178.088	113.715	137.091	153.339	33.7404	0.220038	5
Rps2	82.1187	243.312	76.6972	142.487	136.154	77.4118	0.568562	1
Rps20	8.1253	6.46777	3.70729	5.86644	6.0417	1.82602	0.302237	4
Rps23	4906.2	3747.9	3299.8	4935.36	4222.31	827.09	0.195885	4
Rps24	4813.57	3285.87	2812.27	3501.99	3603.43	856.639	0.237729	4
Rps25	1867.26	1500.11	1198.64	2227.63	1698.41	446.345	0.262802	3
Rps27a	9066.9	7001.48	6215.6	9260.75	7886.18	1511.85	0.191709	4
Rps27l	772.338	778.246	659.696	693.826	726.026	58.6183	0.0807385	6
Rps3	6648.09	4822.37	4213.21	5746.9	5357.65	1066.62	0.199083	4
Rps3a	2932.28	2043.87	1782.47	3049.9	2452.13	633.243	0.258242	4
Rps4x	19199.3	14461.8	14044.9	18891.4	16649.3	2774.75	0.166658	4
Rps5	4085.2	3591.49	2678.48	3933.62	3572.2	630.585	0.176526	4
Rps6	8172.79	5940.98	4796.29	6689.29	6399.84	1415.28	0.221143	4
Rps6ka3	1794.14	1396.71	1097.19	1546.69	1458.68	291.43	0.19979	4
Rps8	4595.58	3021.24	2861.64	3674.88	3538.33	787.763	0.222637	4
Rpsa	10226.7	8065.26	6873.29	9734.11	8724.84	1542.45	0.176788	4
Rras	470.974	294.358	489.611	781.764	509.177	201.902	0.396526	3
Rras2	590.649	400.48	571.52	628.153	547.701	100.926	0.184273	3
Rrbp1	8076.91	6655.57	5846.24	4023.69	6150.6	1691.36	0.27499	5
Rsu1	589.567	492.399	613.971	600.643	574.145	55.4031	0.0964967	6
Rtcb	930.007	792.381	784.021	787.875	823.571	71.0398	0.0862583	6
Rtkn	158.302	749.996	614.824	732.577	563.925	277	0.4912	2
Rtn1	260.434	107.457	149.764	347.03	216.171	108.492	0.501882	3
Rtn4	5044.42	6336.79	7136.08	7601.45	6529.68	1119.47	0.171443	2
Rufy3	575.24	762.545	910.463	1080.03	832.069	214.806	0.258159	2
S100a10	8524.8	6007.49	7540.42	7805.06	7469.44	1059.68	0.141868	4
S100a6	1792.63	8151.66	13803.3	16589.2	10084.2	6548.04	0.649338	2
S100b	3052.78	11615.9	29378.8	52708.2	24188.9	21947.7	0.907344	3
Sacm1l	1293.19	1375.79	1936.28	1895.66	1625.23	337.815	0.207856	2
Samm50	738.602	760.66	683.04	638.996	705.325	54.971	0.0779372	6
Sars	1589.07	1555.44	1402.65	1231.42	1444.65	163.67	0.113294	5
Sbds	1136	1454.49	2244.77	2325.76	1790.26	587.12	0.327953	2
Sbspon	835.33	605.847	734.296	1058.62	808.523	191.358	0.236676	3
Scarb2	1002.32	1228.31	1565.72	1342.93	1284.82	234.719	0.182686	2
Sccpdh	1875.16	1716.38	1940.15	2046.2	1894.48	138.081	0.0728859	6
Scp2	2263.33	3833.13	6174.19	6175.34	4611.5	1915.49	0.415373	2
Sdha	1775.48	1661.74	1874.98	2553.09	1966.32	400.761	0.203812	3
Sdhb	1198.37	1119.3	1034.93	1230.5	1145.77	87.428	0.0763047	6
Sec22b	2402.92	1889.92	1680.56	1563.23	1884.16	371.302	0.197065	5
Sec23a	1248.6	716.92	608.883	536.045	777.612	322.664	0.414942	5
Sec31a	2527.13	2184.05	1754.28	1544.39	2002.46	439.572	0.219516	5
Sec61a1	4781.23	4502.45	3392.71	2496.41	3793.2	1052.18	0.277387	5
Sec61b	778.528	761.226	524.336	468.391	633.12	159.712	0.252262	5
Sept11	3787.03	1970.21	2467.68	1697.8	2480.68	927.396	0.373847	5
Sept2	15846	11412.9	10042.3	8986.1	11571.8	3017.69	0.260778	5
Sept6	535.341	280.27	350.982	197.319	340.978	143.991	0.422289	5
Sept7	5163.8	3351.15	3195.33	3998.76	3927.26	894.755	0.227832	4
Sept8	5432.74	5995.55	6957.93	6353.4	6184.9	639.678	0.103426	2
Sept9	1579.28	1716.93	1784.26	1212.01	1573.12	255.408	0.162357	1
Serpinb6a	521.011	618.166	1596.08	2968.62	1425.97	1137.28	0.797548	3
Serpinf1	2102	2190.36	5279.85	7241.76	4203.49	2507.23	0.596463	2
Serping1	461.539	957.402	4158.26	8862.55	3609.94	3866.05	1.07095	3
Serpinh1	27514.7	15256.6	15883.5	10831.2	17371.5	7126.17	0.410222	5
Set	3761.32	2456.4	1866.67	1879.61	2491	890.41	0.357451	5
Sfn	9.12945	4.99115	9.27948	18.163	10.3908	5.54945	0.534075	3
Sft2d2	356.353	625.889	1234.16	1391.18	901.894	491.118	0.544541	2
Sfxn3	1371.2	1614.83	2426.85	3045.6	2114.62	767.392	0.362899	2
Sgcd	103.38	57.2697	103.531	151.179	103.84	38.3409	0.369231	3
Sirt2	1532.16	1932.94	2749.53	2732.49	2236.78	604.829	0.270402	2
Skp1	6053.66	4793.07	5111.7	5490.31	5362.18	541.967	0.101072	4
Slc16a1	1006.81	1467.61	3078.99	2044.68	1899.52	893.625	0.470447	2
Slc25a1	344.73	1382.35	1873.83	2205.99	1451.73	811.858	0.559236	2
Slc25a10	1109.89	2502	1646.84	1312.61	1642.83	614.07	0.373787	1
Slc25a11	625.173	557.664	529.983	641.397	588.554	53.2859	0.090537	6
Slc25a12	292.697	309.655	325.069	345.923	318.336	22.6503	0.0711523	6
Slc25a20	464.834	479.801	480.443	606.851	507.982	66.306	0.130528	3
Slc25a24	1121.83	814.933	833.978	927.682	924.606	140.414	0.151864	4
Slc25a3	4174.45	3112.21	2876.22	3310.85	3368.43	565.951	0.168016	4
Slc25a4	4650.65	3357.28	3386.56	4426.03	3955.13	679.752	0.171866	4
Slc25a5	3111.76	4869.84	3638.01	2818.88	3609.62	905.924	0.250975	1
Slc2a1	458.718	725.282	2955.74	2007.21	1536.74	1162.69	0.756593	2
Slc3a2	888.904	2209.49	2913.97	3109.53	2280.47	1005.01	0.440704	2
Slc44a1	9349.18	14489.5	12238.3	10320	11599.2	2270.19	0.195719	1
Slc44a2	2122.73	3306.12	5854.12	5906.14	4297.28	1890.61	0.439955	2
Slk	720.897	653.203	679.941	491.665	636.426	100.442	0.157823	5
Snap91	45.6651	56.5113	58.6804	31.571	48.107	12.4074	0.257913	1
Sncg	1913.13	325.825	966.004	13835.8	4260.18	6416.93	1.50626	3
Snd1	2834.66	1961.01	1785.02	1651.59	2058.07	533.01	0.258986	5
Snta1	355.843	1018.95	2216.02	2044.62	1408.86	878.743	0.623727	2
Snx1	431.267	342.942	305.598	465.308	386.279	74.5141	0.192902	4
Snx2	2031.11	1530.08	1417.26	1989.01	1741.86	313.563	0.180016	4
Snx6	1805.64	1481.14	1285.81	1258	1457.65	252.346	0.173118	5
Sod2	578.056	1060.35	1687.64	1414.52	1185.14	479.322	0.404442	2
Sorbs1	1119.84	2434.71	2495.99	1440.52	1872.76	697.12	0.372241	1
Sord	517.912	515.297	982.534	1442.4	864.535	443.457	0.512943	3
Sparc	80179.7	113188	212044	172967	144595	59132.7	0.408955	2
Sptan1	8785.08	10181.9	13394.9	13622.1	11496	2394.57	0.208296	2
Sptbn1	9064.74	8291.02	12760.7	11271.2	10346.9	2045.43	0.197685	2
Sri	641.749	528.256	765.17	966.605	725.445	187.638	0.258653	3
Ssr1	4345.11	2633.13	1878.25	1796.52	2663.25	1182.79	0.444117	5
Ssr3	4827.81	4430.21	3776.55	3572.67	4151.81	580.432	0.139802	5
Ssr4	817.286	603.33	635.407	700.942	689.241	94.5362	0.13716	4
Steap3	55.623	92.8238	405.346	640.703	298.624	276.774	0.92683	2
Stip1	2455.24	1451.64	1189.06	1254.95	1587.72	589.004	0.370974	5
Stk39	1406.77	2088.24	1717.02	1308.15	1630.04	351.651	0.215731	1
Stoml2	636.873	528.339	391.895	503.472	515.145	100.53	0.195148	4
Stx12	2048.57	2475.48	2573.95	2572.12	2417.53	250.234	0.103508	2
Stx1b	89.2117	67.9648	56.6778	45.8521	64.9266	18.5371	0.285509	5
Stx7	1216.01	1152.45	1304.42	1734.36	1351.81	262.538	0.194212	3
Stxbp1	520.552	583.6	846.669	940.698	722.88	202.57	0.280227	2
Stxbp6	202.371	220.426	199.361	108.282	182.61	50.4175	0.276094	5
Sucla2	1198.26	1303.95	1783.03	2138.39	1605.91	436.757	0.271969	2
Suclg1	1354.66	1294.08	1220.65	1483.79	1338.29	111.403	0.0832422	6
Sult1a1	712.393	484.536	2634.76	3706.05	1884.43	1550.77	0.822937	2
Surf4	7120.74	4465.56	3719.73	3056.92	4590.74	1782.12	0.388199	5
Susd2	88.9649	127.946	434.535	399.264	262.677	179.369	0.682849	2
Svip	153.599	3540.61	6012.67	4771.31	3619.55	2521.42	0.696611	2
Syncrip	2359.21	1430.28	1073.65	827.866	1422.75	671.51	0.47198	5
Sypl1	894.225	983.768	1480.32	1549.69	1227	335.758	0.273641	2
Tagln	1507.74	991.391	2082.67	5159.62	2435.35	1870.07	0.767885	3
Tagln2	5949.77	3216.92	3561.43	6186.82	4728.73	1556.19	0.329091	4
Tagln3	10.7511	5.46775	4.46424	21.9166	10.6499	8.00139	0.751309	3
Taldo1	1691.84	3027.81	2977.16	3207.27	2726.02	696.484	0.255495	2
Tcp1	3480.41	2006.07	1616.86	1663.55	2191.72	876.472	0.399901	5
Tecr	1461	2175.12	3044.15	2753.92	2358.55	698.953	0.296349	2
Tf	978.467	1314.06	3383.34	9093.23	3692.27	3754.39	1.01682	3
Tgfbi	15850.4	15510.4	15133	6618.14	13278	4449.55	0.335108	5
Thy1	729.875	442.852	440.201	570.015	545.736	136.893	0.250842	4
Timm50	336.385	313.923	298.534	333.178	320.505	17.69	0.055194	6
Tjp1	3048.69	4949.49	5840.98	4425.93	4566.27	1168.26	0.255845	1
Tjp2	1784.85	4336.19	4154.23	2396.72	3168	1270.86	0.401156	1
Tkt	2975.3	4619.34	5374.37	4689.33	4414.59	1018.19	0.230643	2
Tln1	4205.34	4836.47	5778.22	4979.27	4949.82	646.585	0.130628	2
Tln2	610	747.324	470.069	324.31	537.926	181.914	0.338177	5
Tm9sf3	3098.88	2371.54	2429.77	2085.19	2496.34	428.995	0.171849	5
Tmed10	3985.67	3903.28	3760.29	3301.42	3737.67	305.371	0.081701	6
Tmed2	6759.08	5330.95	4890.16	4611.11	5397.83	954.662	0.17686	5
Tmed4	1069.1	1234.98	1225.48	1164.08	1173.41	76.3083	0.0650312	6
Tmed9	3421.75	2891.22	2573.38	2585.58	2867.98	397.381	0.138558	5
Tmx1	2464.36	1682.2	1372.72	1202.67	1680.49	559.014	0.332649	5
Tns3	4804.44	5043.89	8296.74	7169.46	6328.63	1688.61	0.26682	2
Tom1l2	250.13	454.101	652.97	521.219	469.605	168.024	0.357798	2
Tomm34	361.382	269.915	325.502	524.201	370.25	109.315	0.295245	3
Tomm40	287.724	294.098	203.025	229.151	253.499	44.5722	0.175828	5
Tomm70	238.086	150.75	173.892	167.393	182.53	38.2979	0.209817	4
Tpi1	3634.39	2029.25	3041.01	5829.58	3633.56	1607.01	0.442269	3
Tpm1	6213	3732.02	3869.46	11617.3	6357.95	3686.47	0.57982	3
Tpm3	3905.2	2693.84	2564.07	2790.55	2988.41	618.194	0.206864	4
Tppp3	1528.48	841.599	1504.7	1802.95	1419.43	408.304	0.287653	3
Tsg101	1106.56	1002.48	1184.23	1328.12	1155.35	137.155	0.118714	3
Tspan15	206.615	664.451	517.063	375.427	440.889	195.748	0.443985	1
Tst	67.2316	387.085	388.326	495.532	334.544	185.316	0.553937	2
Tuba1c	1710.1	644.301	2001	5178.32	2383.43	1952.4	0.819156	3
Tuba4a	282.274	63.9548	51.1402	239.548	159.229	118.816	0.746194	4
Tuba8	1.7479	7.08963	3.54867	86.6284	24.7536	41.3095	1.66882	3
Tubb1	16.9384	0.692718	0.387651	0.659454	4.66954	8.18035	1.75185	5
Tubb2a	1809.97	5135.12	4343.74	3564.84	3713.42	1421.7	0.382856	1
Tubb2b	7176.53	5284.44	1842.79	936.363	3810.03	2923.19	0.767237	5
Tubb3	411.209	286.324	300.842	395.11	348.371	63.8799	0.183367	4
Tubb4a	189.352	1266.9	2707.57	4053.68	2054.37	1685.46	0.820424	2
Tubb4b	4761.6	2777.74	2703.37	2553.49	3199.05	1045.87	0.32693	5
Tubb5	31526.4	17776.4	11437.8	8889.97	17407.6	10126.9	0.581752	5
Tubb6	2885.42	1035.47	693.808	712.541	1331.81	1047.55	0.786558	5
Tufm	1086.87	690.965	552.463	640.013	742.578	236.548	0.31855	5
Twf2	241.169	253.289	201.687	272.908	242.263	30.0462	0.124023	3
Txndc5	6966.58	4282.03	3540.24	2917.38	4426.56	1782.86	0.402765	5
Uba1	3855.01	3253.79	3041.72	2677.01	3206.88	493.391	0.153854	5
Ube2d1	334.918	230.666	204.236	261.586	257.851	56.4711	0.219006	4
Ube2i	128.088	97.8476	85.6052	41.8529	88.3485	35.7717	0.404893	5
Ube2l3	3001.63	2498.5	2584.55	2991.74	2769.1	265.153	0.0957541	6
Ube2m	934.435	927.296	882.648	1067.76	953.035	79.8438	0.0837784	6
Ube2n	2284.1	1563.11	1206.18	1326.1	1594.87	482.824	0.302735	5
Ube2v1	2024.93	1842.74	1786.5	1886.17	1885.08	101.766	0.0539848	6
Ubl3	3513.92	5024.47	3679.67	2649.96	3717.01	981.612	0.264087	1
Uchl1	288.376	113.182	136.681	1201.61	434.962	516.961	1.18852	3
Ufd1	730.543	854.962	776.047	836.1	799.413	56.9229	0.0712059	6
Ugp2	1389.72	1029.45	1185.21	1639.95	1311.08	264.257	0.201557	3
Ugt8	2325.84	31950.6	61493.4	23368.6	29784.6	24530.8	0.823608	1
Uqcrb	933.753	875.395	1014.63	1302.92	1031.67	189.627	0.183805	3
Uqcrc1	1308.22	1301.58	992.058	1208.35	1202.55	147.552	0.122699	4
Uqcrc2	2358.93	2378.54	2114.37	2573.31	2356.29	188.083	0.0798218	6
Uqcrfs1	1487.37	1396.09	1259.16	1335.13	1369.44	96.5325	0.0704905	6
Usp5	1848.71	1759.27	1662.51	1437.85	1677.08	176.686	0.105353	5
Vamp3	2281.4	1967.92	1913.65	2226.07	2097.26	183.432	0.0874626	6
Vapa	2963.57	2166.21	2386.12	2944.38	2615.07	401.576	0.153562	4
Vapb	373.329	407.442	388.686	399.266	392.181	14.7277	0.0375532	6
Vat1	3564.95	3985.39	4183.6	5929.51	4415.86	1041.54	0.235864	3
Vat1l	2776.33	10696	17682.2	11795.9	10737.6	6130.02	0.570892	2
Vcl	6836.25	5846.77	3853.52	3557.95	5023.62	1579.08	0.314331	5
Vcp	6816.85	5586.99	4924.06	4565.12	5473.25	990.707	0.181009	5
Vdac1	3524.49	2113.64	1828.45	1771.55	2309.53	823.684	0.356645	5
Vdac2	2912.31	3065.85	2928.78	3288.13	3048.77	173.782	0.0570008	6
Vdac3	2849.46	2195.95	2247.1	2749.75	2510.57	336.877	0.134184	4
Vim	72097.9	73347.7	62904.5	62924.5	67818.6	5685.76	0.0838377	6
Vps26a	580.36	651.936	823.826	769.31	706.358	110.452	0.156369	2
Vps26b	1356.75	1208.42	1301.73	1194.4	1265.32	77.3563	0.0611355	6
Vps29	734.857	825.649	977.611	1091.29	907.353	158.325	0.174491	2
Vps35	3324.85	3302.53	3812.98	3706.33	3536.67	261.293	0.0738811	6
Vsnl1	40.1146	28.3047	402.305	604.444	268.792	283.205	1.05362	2
Vwa5a	832.11	696.702	718.06	935.196	795.517	110.473	0.13887	3
Wars	1124.41	1182.47	1298.95	1082.75	1172.14	93.9079	0.0801164	6
Wdr1	4213.76	3044.04	3462.98	3790.07	3627.71	495.853	0.136685	4
Yars	1025.36	857.302	585.333	612.738	770.182	209.493	0.272005	5
Ybx1	1013.21	1088.1	717.771	693.266	878.088	201.846	0.229869	5
Ybx3	5756.93	1922.51	2103.11	2598.11	3095.16	1797.34	0.580694	4
Ykt6	1026.73	894.938	823.088	665.48	852.559	150.553	0.17659	5
Ywhab	5805.41	4158.97	4477.47	5597.2	5009.76	813.494	0.162382	4
Ywhae	16737.4	12400.2	12126.8	10490.2	12938.7	2669.25	0.2063	5
Ywhag	4261.2	2806.5	2467.57	3293.02	3207.07	780.149	0.243259	4
Ywhah	4778.31	1870.27	1928.61	2637.76	2803.74	1361.82	0.485716	4
Ywhaq	10001.6	9708.44	13794.1	12183	11421.8	1928.7	0.168862	2
Ywhaz	14351.2	10620.5	10417.3	9623.26	11253.1	2109.77	0.187484	5
Zc2hc1a	472.017	372.342	501.237	846.799	548.099	206.637	0.377007	3
Zc3hav1l	51.2005	28.6317	29.1059	18.1444	31.7707	13.9062	0.437706	5
Zyx	1973.41	1302.62	1419.76	1998.98	1673.69	364.15	0.217573	4
