# Supplementary material for: Proteome profile of peripheral myelin in healthy mice and in a neuropathy model
Source: eLife. 2020 Mar 4;9:e51406. doi: 10.7554/eLife.51406 (PMC7056269; doi:10.7554/eLife.51406)
Supplement: Figure 5—source data 1. — Tryptic peptides derived from four technical replicates (replicate digestion and replicate injection) per three biological replicate (20 sciatic nerves pooled from 10 animals) were analyzed by LC-MS (12 runs in total). Proteins (FDR < 1%; 2 peptides/protein) and peptides (FDR < 1%;≥7 amino acids) were identified by database search against the UniprotKB/SwissProt mouse database using PLGS. Data were post-processed with the software package ISOQuant to calculate absolute in-sample amounts for each detected protein based on the TOP3 approach. Reported abundance values are defined as the relative amount of each protein in respect to the sum over all detected proteins (ppm: parts per million (w/w) of total protein). Typical contaminant proteins like keratins were filtered. → sheet 1: protein identification details → sheet 2: Prx-/- myelin proteome by MSE. [file elife-51406-fig5-data1.xlsx]

## Sheet: Table legend
Figure 5-Source data 1. Label-free quantification of proteins in PNS myelin fractions from Prx-/- mice by MSe
Identification and quantification data of detected myelin-associated proteins. Tryptic peptides derived from four technical replicates (replicate digestion and replicate injection) per three biological replicate (20 sciatic nerves pooled from 10 animals) were analyzed by LC-MS (12 runs in total). Proteins (FDR < 1%; 2 peptides/protein) and peptides (FDR < 1%; ≥7 amino acids) were identified by da…
Tab 1	Protein ID details	Number of peptides and proteins identified
Tab 2	protein ppm Prx-KO MSe	LC-MS analysis of PNS myelin by MSe (i.e. with highest dynamic range)
Column descriptions
A	gene name	Gene name as extracted from description (column B)
B	description	Protein description as parsed from source database (UniprotKB/SwissProt mouse, release 2016-07)
C	IEP	Calculated isoelectric point
D	mw	Calculated molecular weight (Da)
E	max score	Maximum identification score provided by PLGS database searching
F	accession	Database accession number as parsed from source database
G	reported peptides	Number of peptides after ISOQuant processing
H	sequence coverage	Sequence coverage of the protein
I	FDR level	FDR rate at protein level
J	entry	Protein entry as parsed from source database
K-V	Prx-KO 1 - Prx-KO 12	Relative protein abundance in ppm for each replicate
W	AVERAGE WT	Average relative protein abundance in ppm
X	AVERAGE WT corr	Average relative protein abundance in ppm adjusted to yield 1 mio after removal of contaminants and manual curation protein quantification

## Sheet: 1 Protein ID details
Acquisition mode	Identified peptides mean (SD); n = 12 PLGS	Identified proteins mean (SD); n = 12 PLGS	Pre-normalization TOP3 values spike mean (SD); n = 12 ISOQuant	Post-normalization TOP3 values spike mean (SD); n = 12 ISOQuant	Quantified proteins ISOQuant	% Sequence coverage ISOQuant
MSE	300 (67)	2765 (758)	103944 (5215)	110361 (15398)	265	35.3
Number of peptides (column B) and proteins (column C) identified by database search against the UniProtKB/Swiss-Prot mouse proteome using ProteinLynx Global Server (PLGS). TOP3 intensity values (abitrary units) obtained by averaging the intensity of the three most intense peptides from the spike tryptic digest of ENO1_YEAST before (columns D) and after (column E) peak intensity normalization. Mea…

## Sheet: 2 protein ppm Prx-KO MSe
gene name	description	IEP	mw	max score	accession	reported peptides	sequence coverage	FDR level	entry	Prx-KO 1	Prx-KO 2	Prx-KO 3	Prx-KO 4	Prx-KO 5	Prx-KO 6	Prx-KO 7	Prx-KO 8	Prx-KO 9	Prx-KO 10	Prx-KO 11	Prx-KO 12	AVERAGE Prx-KO	AVERAGE Prx-KO corr
Mpz	Myelin protein P0 OS=Mus musculus GN=Mpz PE=1 SV=1	9.75	27792.9	27291.9	P27573	10	37.5	0	MYP0_MOUSE	505673	495780	436607	447229	457236	446239	538379	494758	428878	477409	405541	475529	467438	581307
Mbp	Myelin basic protein OS=Mus musculus GN=Mbp PE=1 SV=2	10.05	27167.7	28611.4	P04370	6	21.6	0	MBP_MOUSE	241859	247005	203724	199153	185194	193279	226181	249594	204911	190203	200896	184697	210558	261850
Cd9	CD9 antigen OS=Mus musculus GN=Cd9 PE=1 SV=2	6.96	25828.3	23339	P40240	5	26.55	0	CD9_MOUSE	5030.75	5748.94	9232.69	9403.96	8288.34	5149.27	4522.17	4969.61	7815.16	8511.48	8517.23	4256.43	6787.17	8440.53
Eef1a1	Elongation factor 1-alpha 1 OS=Mus musculus GN=Eef1a1 PE=1 SV=3	9.34	50456.1	19308.8	P10126	18	64.07	0	EF1A1_MOUSE	4076.54	4176.59	4605.23	4508.26	3930.36	4428.94	4394.78	4053.05	4822.36	4932.13	4328.34	4751.03	4417.3	5493.36
Sptbn1	Spectrin beta chain, non-erythrocytic 1 OS=Mus musculus GN=Sptbn1 PE=1 SV=2	5.26	275079	587.894	Q62261	65	39.65	0.0086	SPTB2_MOUSE	3959.37	2109.36	4804.4	5990.32	5902.34	4962.04	2056.09	1737.02	3998.27	5582.66	6644.66	4606.9	4362.78	5425.57
Acly	ATP-citrate synthase OS=Mus musculus GN=Acly PE=1 SV=1	7.12	120641	574.664	Q91V92	23	28.96	0.0086	ACLY_MOUSE	3865.37	3750.79	4601.51	3986.08	3765.94	3199.75	3486.34	3707.48	4811.36	3808.61	3952.58	2978.5	3826.19	4758.26
Tuba4a	Tubulin alpha-4A chain OS=Mus musculus GN=Tuba4a PE=1 SV=1	4.75	50665.8	12197.2	P68368	18	54.46	0	TBA4A_MOUSE	2755.39	2750.19	3451.41	3412.96	4871.8	4874.5	2664.2	2814	3232.35	3065.12	4403.78	4607.11	3575.23	4446.17
Eno1	Alpha-enolase OS=Mus musculus GN=Eno1 PE=1 SV=3	6.38	47483.1	30519	P17182	25	73.73	0	ENOA_MOUSE	2576.96	2700.56	2941.44	2991.09	2341.42	2858.22	2424.04	2801.43	3251.57	2793.81	2603.26	2873.55	2763.11	3436.21
Tkt	Transketolase OS=Mus musculus GN=Tkt PE=1 SV=1	7.23	68314.9	8311.18	P40142	26	60.83	0	TKT_MOUSE	1970.36	1951.67	2639.18	2717.54	2618.21	2941.9	1825.82	2026.01	2698.57	2491.28	2958.07	2774.02	2467.72	3068.86
Dpysl2	Dihydropyrimidinase-related protein 2 OS=Mus musculus GN=Dpysl2 PE=1 SV=2	5.92	62676.9	12876	O08553	28	74.83	0	DPYL2_MOUSE	1859.42	1957.47	2845.45	2950.61	2296.56	2595.53	1549.81	1819.46	3001.07	2685.28	2603.04	2429.55	2382.77	2963.22
Tf	Serotransferrin OS=Mus musculus GN=Tf PE=1 SV=1	6.85	78890.9	8397.54	Q921I1	38	66.43	0	TRFE_MOUSE	2523.69	2422.09	2267.76	2358.9	2331.5	2449.67	2347.37	2548.48	2459.2	2040.97	2487.18	2170.52	2367.28	2943.95
Epb41l2	Band 4.1-like protein 2 OS=Mus musculus GN=Epb41l2 PE=1 SV=2	5.15	110453	2969.39	O70318	49	58.5	0	E41L2_MOUSE	1791.53	2530.58	2025.11	2086.3	2853.77	2665.55	2210.89	1722.09	2005.09	1893.49	3145.67	2537.86	2288.99	2846.6
Nefh	Neurofilament heavy polypeptide OS=Mus musculus GN=Nefh PE=1 SV=3	5.56	117280	1854.11	P19246	30	33.39	0	NFH_MOUSE	2449.16	2517.57	2072.17	2230.17	1797.92	2341.35	2221.93	2650.73	2201.75	2109.67	2018.5	2176.63	2232.3	2776.09
Vim	Vimentin OS=Mus musculus GN=Vim PE=1 SV=3	4.86	53744.8	17992.4	P20152	33	66.74	0	VIME_MOUSE	1564.03	1582.44	2126.94	2066.49	2761.52	3112.65	1490.63	1599.73	2430.11	1892.4	3064.7	2913.32	2217.08	2757.17
Slc44a1	Choline transporter-like protein 1 OS=Mus musculus GN=Slc44a1 PE=1 SV=3	8.72	74606.9	820.876	Q6X893	12	22.51	0.0056	CTL1_MOUSE	2616.91	2201.23	2089.39	2522.83	2315.41	2244.91	1960.18	2078.71	2087.59	2240.22	2177.29	1887.89	2201.88	2738.26
Nefm	Neurofilament medium polypeptide OS=Mus musculus GN=Nefm PE=1 SV=4	4.56	96030.3	3942.76	P08553	37	52.24	0	NFM_MOUSE	1577.2	1461.88	1833.86	1851.38	2590.24	2832.77	1384.58	1532	1876.45	1669.14	2899.83	2528.65	2003.17	2491.14
Cnp	2',3'-cyclic-nucleotide 3'-phosphodiesterase OS=Mus musculus GN=Cnp PE=1 SV=3	9.26	47522.6	11535.7	P16330	24	67.62	0	CN37_MOUSE	1727.57	1630.87	1935	2149.9	2161.67	2451.12	1629.22	1666.24	2023.28	1860.26	2428.82	2298.15	1996.84	2483.27
Map1b	Microtubule-associated protein 1B OS=Mus musculus GN=Map1b PE=1 SV=2	4.57	271510	531.01	P14873	24	17.09	0.0086	MAP1B_MOUSE	1895.03	2310.34	1650.98	1278.45	1634.77	2399.92	1920.05	2260.96	1859.01	1668.67	1639.61	2199.93	1893.14	2354.32
Pmp2	Myelin P2 protein OS=Mus musculus GN=Pmp2 PE=2 SV=2	10	15049.5	33826.9	P24526	10	65.15	0	MYP2_MOUSE	1881.42	1889.78	1993.45	1964.14	1771.95	1696.44	1827.79	1986.1	2093.19	1781.19	1824.31	1487.03	1849.73	2300.33
Fasn	Fatty acid synthase OS=Mus musculus GN=Fasn PE=1 SV=2	6.12	275166	627.321	P19096	58	37.74	0.0086	FAS_MOUSE	1372.2	1280.3	1571.92	1948.52	1617.54	1866.11	1297.13	1328.09	1663.14	1918.52	1642.6	1762.95	1605.75	1996.91
Plp1	Myelin proteolipid protein OS=Mus musculus GN=Plp1 PE=1 SV=2	8.29	30875.6	8289.81	P60202	8	25.99	0	MYPR_MOUSE	1818.65	1787.46	1497.55	1521.89	1230.44	1570.23	1670.63	1820.03	1598.26	1421.4	1456.81	1496.61	1574.16	1957.63
Actbl2	Beta-actin-like protein 2 OS=Mus musculus GN=Actbl2 PE=1 SV=1	5.15	42346.5	5386.5	Q8BFZ3	7	25.8	0	ACTBL_MOUSE	1407.03	1422.95	1413.48	1368.15	1623.53	1810.98	1232.8	1420.03	1441.46	1340.19	1731.11	1691.03	1491.89	1855.32
Anxa2	Annexin A2 OS=Mus musculus GN=Anxa2 PE=1 SV=2	7.69	38961.4	14618.2	P07356	24	69.91	0	ANXA2_MOUSE	1355.49	1337.69	1404.99	1656.57	1417.22	1616.5	1169.7	1336.44	1434.68	1317.8	1592.18	1531.05	1430.86	1779.42
Gapdh	Glyceraldehyde-3-phosphate dehydrogenase OS=Mus musculus GN=Gapdh PE=1 SV=2	8.35	36095.2	16295.2	P16858	13	52.55	0	G3P_MOUSE	980.868	980.519	1430.57	1355.68	1923.45	1863.64	881.393	959.853	1529.89	1323.68	1864.71	1684.13	1398.2	1738.8
Nefl	Neurofilament light polypeptide OS=Mus musculus GN=Nefl PE=1 SV=5	4.41	61565.6	9153.84	P08551	30	60.96	0	NFL_MOUSE	1068.33	1055.95	1131.84	1231.95	1761.52	2062.32	937.017	1084.99	1199.38	1176.96	1932.44	2057.11	1391.65	1730.66
Gstm1	Glutathione S-transferase Mu 1 OS=Mus musculus GN=Gstm1 PE=1 SV=2	8.12	26084.1	2738.61	P10649	14	64.68	0	GSTM1_MOUSE	1563.58	1452.45	1499.42	1238.28	1152.41	1370.99	1274.89	1544.82	1248.67	1146.55	1277.87	1143.51	1326.12	1649.17
Sptan1	Spectrin alpha chain, non-erythrocytic 1 OS=Mus musculus GN=Sptan1 PE=1 SV=4	5.04	285396	508.848	P16546	46	25.97	0.0086	SPTN1_MOUSE	1055.54	961.441	1322.23	1529.78	1462.01	1665.81	844.091	962.994	1272.01	1241.95	1637.76	1539.14	1291.23	1605.77
Tubb5	Tubulin beta-5 chain OS=Mus musculus GN=Tubb5 PE=1 SV=1	4.59	50127.2	31165.6	P99024	23	61.26	0	TBB5_MOUSE	971.565	938.333	1189.01	1154.39	1533.33	1680.44	753.88	943.867	1257.76	1103.53	1679.35	1716.58	1243.5	1546.42
C3	Complement C3 OS=Mus musculus GN=C3 PE=1 SV=3	6.27	188024	1004.07	P01027	56	44.2	0.0056	CO3_MOUSE	1012.79	1233.08	1279.05	1505.01	1358.6	1157.6	905.239	1120.53	1246.7	1395.21	1388.59	1082.2	1223.72	1521.81
Pllp	Plasmolipin OS=Mus musculus GN=Pllp PE=2 SV=1	9.57	19915.6	9269.85	Q9DCU2	2	21.43	0	PLLP_MOUSE	1307.78	1352.25	1087.56	1095.71	1023.17	1113.23	1171.63	1361.74	1264.76	1061.41	1128.22	1077.79	1170.44	1455.56
Prdx1	Peroxiredoxin-1 OS=Mus musculus GN=Prdx1 PE=1 SV=1	8.23	22404.6	11001.6	P35700	12	67.34	0	PRDX1_MOUSE	1111.25	1079.7	1290.84	1244.22	1137.38	1272.05	1039.96	1097.65	1307.67	1158.22	1221.41	1029.06	1165.78	1449.77
Ckm	Creatine kinase M-type OS=Mus musculus GN=Ckm PE=2 SV=1	6.62	43273.2	17667.4	P07310	16	57.48	0	KCRM_MOUSE	504.303	549.602	1951.51	1859.92	965.328	789.236	366.082	476.54	2027.21	1723.23	1045.33	743.293	1083.47	1347.4
Aldoa	Fructose-bisphosphate aldolase A OS=Mus musculus GN=Aldoa PE=1 SV=2	8.07	39812.2	8675.77	P05064	24	84.07	0	ALDOA_MOUSE	713.371	743.684	1177.29	1206.45	1104.91	1316.39	669.424	773.844	1259.83	1093.32	1271.28	1245.59	1047.95	1303.23
Hspa8	Heat shock cognate 71 kDa protein OS=Mus musculus GN=Hspa8 PE=1 SV=1	5.2	71099.3	4580.36	P63017	29	57.43	0	HSP7C_MOUSE	906.797	892.569	1011.57	1008.62	1077.5	1299.84	825.852	897.555	1111.72	960.022	1168.77	1209.65	1030.87	1281.99
Atp5a1	ATP synthase subunit alpha, mitochondrial OS=Mus musculus GN=Atp5a1 PE=1 SV=1	9.52	59866.8	4492.09	Q03265	22	50.45	0	ATPA_MOUSE	824.438	941.622	957.489	1325.63	1060.74	1058.34	980.632	1203.58	1059.12	1135.32	955.768	813.728	1026.37	1276.39
Myh9	Myosin-9 OS=Mus musculus GN=Myh9 PE=1 SV=4	5.38	227570	391.3	Q8VDD5	29	20.87	0.0086	MYH9_MOUSE	981.896	1035.4	889.807	1031.99	963.762	1281.94	790.811	1043.33	1000.65	872.146	1071.37	1150.79	1009.49	1255.41
Atp5b	ATP synthase subunit beta, mitochondrial OS=Mus musculus GN=Atp5b PE=1 SV=2	5.03	56300.6	6424.79	P56480	22	58.98	0	ATPB_MOUSE	733.806	728.571	1114	1100.16	1019.13	1135.6	661.012	741.837	1141.79	1072.76	1154.98	1048.25	970.992	1207.53
Cltc	Clathrin heavy chain 1 OS=Mus musculus GN=Cltc PE=1 SV=3	5.35	193325	692.919	Q68FD5	35	31.52	0.0056	CLH1_MOUSE	876.789	930.46	901.452	969.526	1025.36	1077.89	780.343	977.36	940.094	866.81	1110.14	1028.31	957.044	1190.18
Map4	Microtubule-associated protein 4 OS=Mus musculus GN=Map4 PE=1 SV=3	4.7	118000	1426.86	P27546	36	54.58	0	MAP4_MOUSE	987.506	997.238	963.536	942.708	815.386	979.45	908.511	1015.86	1036.14	885.681	922.94	885.809	945.064	1175.28
Mag	Myelin-associated glycoprotein OS=Mus musculus GN=Mag PE=1 SV=2	4.85	70115.2	1122.43	P20917	12	26.2	0	MAG_MOUSE	721.668	811.085	1042.98	901.001	1018.81	969.128	773.239	861.631	951.542	841.085	1110.23	906.806	909.1	1130.56
Ppia	Peptidyl-prolyl cis-trans isomerase A OS=Mus musculus GN=Ppia PE=1 SV=2	8	18142.5	25783.7	P17742	9	64.63	0	PPIA_MOUSE	951.403	934.415	918.999	863.023	744.763	742.006	919.285	988.889	945.616	771.107	827.589	725.717	861.068	1070.83
Flnb	Filamin-B OS=Mus musculus GN=Flnb PE=1 SV=3	5.34	280277	485.496	Q80X90	45	29.05	0.0086	FLNB_MOUSE	808.906	782.742	836.042	867.504	807.187	1045.74	709.166	839.138	857.431	796.621	944.568	1005.34	858.365	1067.46
Atp1a4	Sodium/potassium-transporting ATPase subunit alpha-4 OS=Mus musculus GN=Atp1a4 PE=1 SV=3	5.37	116085	857.448	Q9WV27	11	13.76	0.0056	AT1A4_MOUSE	1039.73	1100.33	1088.84	782.158	725.624	715.963	1067.73	559.526	724.017	807.78	704.731	670.237	832.222	1034.95
Aco2	Aconitate hydratase, mitochondrial OS=Mus musculus GN=Aco2 PE=1 SV=1	7.83	86205	1742.25	Q99KI0	31	51.79	0	ACON_MOUSE	600.794	601.404	1173.02	1109.37	662.752	865.902	536.591	621.734	1110.53	999.479	944.916	751.02	831.459	1034
Atp1a1	Sodium/potassium-transporting ATPase subunit alpha-1 OS=Mus musculus GN=Atp1a1 PE=1 SV=1	5.14	114294	2438.65	Q8VDN2	34	41.84	0	AT1A1_MOUSE	795.982	771.346	751.612	780.198	904.618	964.721	704.381	820.593	780.558	722.937	1029.62	915.134	828.475	1030.29
Cap1	Adenylyl cyclase-associated protein 1 OS=Mus musculus GN=Cap1 PE=1 SV=4	7.3	51907.1	4435.85	P40124	19	52.95	0	CAP1_MOUSE	615.251	647.016	816.292	976.629	886.534	907.202	591.06	666.276	853.716	859.704	950.551	857.576	802.317	997.763
Cd81	CD81 antigen OS=Mus musculus GN=Cd81 PE=1 SV=2	5.44	26498.9	8537.11	P35762	5	64.83	0	CD81_MOUSE	788.597	762.422	903.112	864.068	744.683	801.351	656.103	707.854	957.367	827.712	811.806	749.695	797.898	992.267
Igh-3	Ig gamma-2B chain C region OS=Mus musculus GN=Igh-3 PE=1 SV=3	6.07	45000.8	4564.27	P01867	8	26.98	0	IGG2B_MOUSE	880.241	955.509	673.709	672.499	720.402	861.742	851.541	966.106	706.484	621.466	824.261	809.101	795.255	988.98
Flna	Filamin-A OS=Mus musculus GN=Flna PE=1 SV=5	5.61	284073	552.367	Q8BTM8	41	28.71	0.0086	FLNA_MOUSE	489.196	503.592	859.919	814.895	901.561	1030.62	441.856	529.838	856.698	832.275	1029.69	958.517	770.722	958.471
Pkm	Pyruvate kinase PKM OS=Mus musculus GN=Pkm PE=1 SV=4	7.21	58415.3	3519.06	P52480	21	59.7	0	KPYM_MOUSE	568.352	600.832	753.709	716.444	721.496	907.834	529.674	623.75	801.583	718.703	863.313	811.012	718.059	892.979
Eno3	Beta-enolase OS=Mus musculus GN=Eno3 PE=1 SV=3	6.81	47367.1	14594.4	P21550	15	52.07	0	ENOB_MOUSE	434.555	446.519	1038.63	1103.79	500.549	612.132	430.011	419.893	1159.73	1059.05	558.532	604.931	697.36	867.238
Gsn	Gelsolin OS=Mus musculus GN=Gsn PE=1 SV=3	5.76	86340.9	644.835	P13020	15	30.13	0.0086	GELS_MOUSE	759.774	651.622	668.73	639.993	656.084	775.757	643.815	683.804	697.662	608.179	731.144	743.895	688.372	856.06
	Ig gamma-2A chain C region secreted form OS=Mus musculus PE=1 SV=1	8.2	37109.2	3338.93	P01864	6	24.78	0	GCAB_MOUSE	552.555	538.472	546.584	570.03	799.485	927.594	470.319	568.928	573.178	544.59	892.706	867.46	654.325	813.72
Cs	Citrate synthase, mitochondrial OS=Mus musculus GN=Cs PE=1 SV=1	8.72	52021.9	674.984	Q9CZU6	12	30.6	0.0056	CISY_MOUSE	232.514	446.579	1179.61	1067.26	891.083	322.672	135.478	297.604	1062.82	877.607	1013.57	255.33	648.511	806.489
Msn	Moesin OS=Mus musculus GN=Msn PE=1 SV=3	6.18	67881.2	1415.24	P26041	24	47.66	0	MOES_MOUSE	455.963	541.224	671.449	746.267	765.892	860.757	337.845	449.964	597.245	632.729	771.09	763.806	632.853	787.017
Tubb2a	Tubulin beta-2A chain OS=Mus musculus GN=Tubb2a PE=1 SV=1	4.59	50306.3	29004.7	Q7TMM9	23	60	0	TBB2A_MOUSE	475.835	468.625	567.797	553.999	735.002	814.747	394.126	481.189	610.763	524.126	813.57	829.65	605.786	753.356
Anxa6	Annexin A6 OS=Mus musculus GN=Anxa6 PE=1 SV=3	5.18	76341.7	1874.29	P14824	33	56.91	0	ANXA6_MOUSE	550.318	520.485	623.279	616.836	642.87	718.791	459.571	492.317	620.128	558.005	723.512	705.269	602.615	749.413
Bcas1	Breast carcinoma-amplified sequence 1 homolog OS=Mus musculus GN=Bcas1 PE=2 SV=3	5.82	67833.8	1146.73	Q80YN3	10	19.59	0	BCAS1_MOUSE	632.726	602.808	606.338	576.91	529.408	530.831	614.973	617.955	601.535	489.49	596.576	566.131	580.473	721.878
Tubb3	Tubulin beta-3 chain OS=Mus musculus GN=Tubb3 PE=1 SV=1	4.63	50875	12957.3	Q9ERD7	23	65.56	0	TBB3_MOUSE	411.636	429.676	547.671	600.219	828.508	704.352	331.551	427.347	520.379	570.414	852.486	716.43	578.389	719.286
Col1a2	Collagen alpha-2(I) chain OS=Mus musculus GN=Col1a2 PE=2 SV=2	9.5	130070	375.002	Q01149	6	6.12	0.0086	CO1A2_MOUSE	261.387	262.743	732.147	771.091	598.15	667.073	364.523	279.015	729.913	744.726	686.572	595.875	557.768	693.641
Col1a1	Collagen alpha-1(I) chain OS=Mus musculus GN=Col1a1 PE=1 SV=4	5.51	139059	429.398	P11087	4	4.27	0.0086	CO1A1_MOUSE	476.48	413.657	694.283	611.032	524.61	593.982	428.96	414.958	710.571	615.338	639.576	527.172	554.218	689.227
Fga	Fibrinogen alpha chain OS=Mus musculus GN=Fga PE=2 SV=1	5.69	88170.7	625.951	E9PV24	12	21.17	0.0086	FIBA_MOUSE	554.693	508.518	618.204	600.619	478.781	595.039	473.194	554.409	627.625	533.357	583.79	515.877	553.676	688.552
Prph	Peripherin OS=Mus musculus GN=Prph PE=1 SV=2	5.25	54381.7	3927	P15331	24	52	0	PERI_MOUSE	407.624	383.643	476.182	516.102	660.1	731.475	362.101	397.308	500.796	413.082	731.621	659.403	519.953	646.615
Got2	Aspartate aminotransferase, mitochondrial OS=Mus musculus GN=Got2 PE=1 SV=1	9.26	47810.7	3303.22	P05202	20	54.65	0	AATM_MOUSE	492.737	492.329	523.637	493.029	462.324	501.373	444.174	508.145	540.421	468.039	505.301	487.798	493.276	613.438
Nme2	Nucleoside diphosphate kinase B OS=Mus musculus GN=Nme2 PE=1 SV=1	7.37	17477.2	7756.3	Q01768	9	68.42	0	NDKB_MOUSE	457.515	443.482	546.619	495.226	515.229	482.684	430.766	458.585	590.869	478.172	562.463	421.95	490.297	609.734
Tubb4a	Tubulin beta-4A chain OS=Mus musculus GN=Tubb4a PE=1 SV=3	4.59	50042.1	21089.1	Q9D6F9	21	65.54	0	TBB4A_MOUSE	351.659	359.429	481.52	440.071	593.638	627.465	275.924	342.677	503.744	419.208	661.99	597.242	471.214	586.002
Cryab	Alpha-crystallin B chain OS=Mus musculus GN=Cryab PE=1 SV=2	6.92	20068.8	13823.4	P23927	7	50.29	0	CRYAB_MOUSE	383.673	402.381	494.289	497.185	517.534	585.165	356.839	412.946	424.452	431.15	548.331	525.137	464.924	578.18
Atp2a1	Sarcoplasmic/endoplasmic reticulum calcium ATPase 1 OS=Mus musculus GN=Atp2a1 PE=1 SV=1	4.95	110794	615.558	Q8R429	18	26.86	0.0086	AT2A1_MOUSE	103.367		766.246	675.591	310.487	274.269			750.891	694.665	320.946	250.274	460.748	572.988
Hadha	Trifunctional enzyme subunit alpha, mitochondrial OS=Mus musculus GN=Hadha PE=1 SV=1	9.46	83354.3	822.944	Q8BMS1	17	37.35	0.0056	ECHA_MOUSE	350.578	337.733	462.105	656.738	474.272	485.297	301.603	336.927	463.542	649.52	523.526	431.698	456.128	567.242
Ca2	Carbonic anhydrase 2 OS=Mus musculus GN=Ca2 PE=1 SV=4	6.53	29146.6	5183.67	P00920	11	67.69	0	CAH2_MOUSE	383.767	382.754	482.709	479.7	448.174	518.107	316.018	378.905	489.946	454.925	491.574	495.524	443.508	551.548
Atp1a3	Sodium/potassium-transporting ATPase subunit alpha-3 OS=Mus musculus GN=Atp1a3 PE=1 SV=1	5.09	113117	1648.31	Q6PIC6	32	44.32	0	AT1A3_MOUSE	393.683	362.473	403.496	398.976	476.353	534.013	376.055	401.147	459.089	356.125	507.374	505.657	431.203	536.245
Ndrg1	Protein NDRG1 OS=Mus musculus GN=Ndrg1 PE=1 SV=1	5.65	43465	4082.99	Q62433	12	52.54	0	NDRG1_MOUSE	357.162	363.949	435.109	396.703	593.034	517.261	293.73	361.087	373.54	338.24	637.86	498.787	430.538	535.418
Atp5o	ATP synthase subunit O, mitochondrial OS=Mus musculus GN=Atp5o PE=1 SV=1	10.41	23420.6	2373.79	Q9DB20	7	48.83	0	ATPO_MOUSE	119.539	299.055	408.027	461.73	439.15	615.565	108.364	348.932	598.885	503.938	597.775	641.932	428.574	532.976
Vcp	Transitional endoplasmic reticulum ATPase OS=Mus musculus GN=Vcp PE=1 SV=4	4.95	90006.3	549.277	Q01853	16	31.39	0.0086	TERA_MOUSE	267.364	346.176	479.4	551.711	453.537	521.051	303.609	253.941	562.402	527.355	391.493	466.541	427.048	531.078
Hspa12a	Heat shock 70 kDa protein 12A OS=Mus musculus GN=Hspa12a PE=1 SV=1	6.32	75213.7	1571.06	Q8K0U4	21	45.63	0	HS12A_MOUSE	412.845	443.67	371.742	404.985	403.886	489.834	392.523	456.082	401.225	375.136	452.506	466.889	422.61	525.559
Col6a1	Collagen alpha-1(VI) chain OS=Mus musculus GN=Col6a1 PE=2 SV=1	5.03	109630	583.788	Q04857	13	19.8	0.0086	CO6A1_MOUSE	306.883	300.093	441.063	427.247	465.036	548.385	266.762	271.213	480.072	413.265	563.345	518.245	416.801	518.334
Pdia3	Protein disulfide-isomerase A3 OS=Mus musculus GN=Pdia3 PE=1 SV=2	5.81	57134.7	685.648	P27773	13	38.42	0.0056	PDIA3_MOUSE	423.541	355.961	357.318	359.798	435.867	540.739	428.269	377.868	406.764	325.659	479.629	507.76	416.598	518.081
Gdi2	Rab GDP dissociation inhibitor beta OS=Mus musculus GN=Gdi2 PE=1 SV=1	5.85	51050.5	3801.85	Q61598	23	67.42	0	GDIB_MOUSE	379.252	387.05	419.833	434.133	429.024	464.999	361.629	417.272	465.231	395.296	390.704	445.566	415.832	517.13
Tppp3	Tubulin polymerization-promoting protein family member 3 OS=Mus musculus GN=Tppp3 PE=1 SV=1	9.52	19136.6	8243.48	Q9CRB6	11	48.86	0	TPPP3_MOUSE	488.105	403.676	379.542	475.616	303.678	411.233	458.88	422.861	476.187	442.328	304.043	378.583	412.061	512.44
Eef2	Elongation factor 2 OS=Mus musculus GN=Eef2 PE=1 SV=2	6.39	96283.7	1021.11	P58252	22	36.95	0.0056	EF2_MOUSE	301.781	308.747	413.669	434.633	504.866	509.117	277.043	294.109	459.168	415.693	498.919	468.391	407.178	506.367
Anxa1	Annexin A1 OS=Mus musculus GN=Anxa1 PE=1 SV=2	7.17	39019.5	4697.62	P10107	20	65.03	0	ANXA1_MOUSE	447.162	453.856	377.404	425.383	356.701	371.464	403.689	479.637	393.473	387.298	383.046	353.835	402.746	500.855
Cat	Catalase OS=Mus musculus GN=Cat PE=1 SV=4	7.79	60080.6	2012.83	P24270	20	55.22	0	CATA_MOUSE	389.449	380.963	421.144	375.308	399.296	423.15	336.641	401.029	439.784	350.007	436.089	403.895	396.396	492.959
Serpinh1	Serpin H1 OS=Mus musculus GN=Serpinh1 PE=1 SV=3	9.19	46647.7	1771.93	P19324	12	41.73	0	SERPH_MOUSE	349.747	332.216	458.667	441.592	402.346	407.394	308.326	343.34	462.133	393.818	440.055	403.354	395.249	491.532
Hsp90ab1	Heat shock protein HSP 90-beta OS=Mus musculus GN=Hsp90ab1 PE=1 SV=3	4.78	83623.5	1132.18	P11499	20	36.33	0	HS90B_MOUSE	349.932	328.681	391.149	394.358	425.9	467.136	311.6	343.341	418.889	369.504	460.51	440.635	391.803	487.247
Dpysl3	Dihydropyrimidinase-related protein 3 OS=Mus musculus GN=Dpysl3 PE=1 SV=1	6.03	62335.6	2387.15	Q62188	21	64.91	0	DPYL3_MOUSE	399.385	405.812	413.037	405.325	377.368	385.133	356.959	382.997	426.147	378.69	399.896	363.234	391.165	486.454
Tubb2b	Tubulin beta-2B chain OS=Mus musculus GN=Tubb2b PE=1 SV=1	4.59	50409.4	28960.8	Q9CWF2	23	60	0	TBB2B_MOUSE	304.9	300.279	363.826	354.984	470.965	522.064	255.77	308.33	391.357	335.843	521.309	531.613	388.437	483.061
Ca3	Carbonic anhydrase 3 OS=Mus musculus GN=Ca3 PE=1 SV=3	6.99	29651.5	2559.71	P16015	12	64.62	0	CAH3_MOUSE	372.783	371.589	406.357	389.718	310.956	363.478	338.263	381.192	425.346	357.036	348.52	330.454	366.308	455.541
Eef1a2	Elongation factor 1-alpha 2 OS=Mus musculus GN=Eef1a2 PE=1 SV=1	9.35	50796.4	3851.8	P62631	16	53.56	0	EF1A2_MOUSE	254.056	282.896	456.343	462.251	364.002	362.87	244.454	266.943	504.356	462.001	401.318	302.134	363.635	452.217
Fgg	Fibrinogen gamma chain OS=Mus musculus GN=Fgg PE=1 SV=1	5.44	50075.8	1420.19	Q8VCM7	15	47.48	0	FIBG_MOUSE	323.095	317.608	393.051	422.521	336.151	384.637	286.695	319.513	415.96	364.509	358.318	358.979	356.753	443.659
Vwa5a	von Willebrand factor A domain-containing protein 5A OS=Mus musculus GN=Vwa5a PE=1 SV=2	6.13	87884.3	773.239	Q99KC8	17	29.13	0.0056	VMA5A_MOUSE	449.02	449.205	318.7	315.561	273.402	326.547	417.976	452.012	323.297	291.7	331.106	330.355	356.573	443.435
Canx	Calnexin OS=Mus musculus GN=Canx PE=1 SV=1	4.29	67677.2	667.929	P35564	10	23.52	0.0056	CALX_MOUSE	336.673	321.761	329.56	320.061	384.685	418.524	299.657	344.197	360.689	300.254	419.503	388.868	352.036	437.793
Mdh2	Malate dehydrogenase, mitochondrial OS=Mus musculus GN=Mdh2 PE=1 SV=3	8.82	36067.7	6637.38	P08249	14	51.48	0	MDHM_MOUSE	312.184	346.315	367.447	371.358	304.548	373.941	205.006	272.642	392.215	362.791	356.788	333.665	333.242	414.42
Fgb	Fibrinogen beta chain OS=Mus musculus GN=Fgb PE=2 SV=1	6.71	55437.2	1286.17	Q8K0E8	22	65.7	0	FIBB_MOUSE	264.967	271.491	362.793	402.533	307.521	364.503	204.197	262.63	417.356	359.7	367.36	335.213	326.689	406.271
Rdx	Radixin OS=Mus musculus GN=Rdx PE=1 SV=3	5.83	68657	799.737	P26043	14	26.59	0.0056	RADI_MOUSE	264.303	249.528	351.396	351.134	348.687	344.475	231.127	258.353	394.647	327.487	434.217	323.16	323.21	401.944
Mgll	Monoglyceride lipase OS=Mus musculus GN=Mgll PE=1 SV=1	6.72	33729.7	949.247	O35678	5	23.76	0.0056	MGLL_MOUSE	431.913	345.899	335.665	156.842	182.185	212.005	475.039	247.205	218.632	467.24	352.293	352.567	314.79	391.474
Pdcd6ip	Programmed cell death 6-interacting protein OS=Mus musculus GN=Pdcd6ip PE=1 SV=3	6.1	96594.6	340.28	Q9WU78	7	10.59	0.0086	PDC6I_MOUSE	395.898	396.102	281.885	277.33	249.642	279.708	345.098	401.277	323.059	264.612	266.371	230.069	309.254	384.589
Cadm4	Cell adhesion molecule 4 OS=Mus musculus GN=Cadm4 PE=1 SV=1	5.88	43179.6	988.39	Q8R464	11	44.59	0.0056	CADM4_MOUSE	299.414	295.6	314.646	314.911	294.144	326.633	272.291	306.367	332.298	288.922	309.789	301.165	304.682	378.903
Aldh2	Aldehyde dehydrogenase, mitochondrial OS=Mus musculus GN=Aldh2 PE=1 SV=1	7.49	57050.9	913.788	P47738	18	48.75	0.0056	ALDH2_MOUSE	219.709	252.492	295.585	330.281	313.18	367.081	228.628	267.141	324.778	314.687	352.648	291.051	296.438	368.651
Fscn1	Fascin OS=Mus musculus GN=Fscn1 PE=1 SV=4	6.45	55249.4	665.938	Q61553	15	38.95	0.0056	FSCN1_MOUSE	279.059	277.809	303.529	319.852	268.745	325.943	249.566	294.456	325.954	300.77	296.774	286.279	294.061	365.695
Atp1a2	Sodium/potassium-transporting ATPase subunit alpha-2 OS=Mus musculus GN=Atp1a2 PE=1 SV=1	5.23	113529	1465.76	Q6PIE5	18	23.43	0	AT1A2_MOUSE	254.025	255.284	318.114	239.507	298.338	378.574	247.855	269.221	316.342	262.844	304.206	339.345	290.305	361.023
Stxbp6	Syntaxin-binding protein 6 OS=Mus musculus GN=Stxbp6 PE=2 SV=1	9.57	23956.2	1070.55	Q8R3T5	6	33.33	0	STXB6_MOUSE	336.552	338.889	289.836	269.894	226.784	256.257	326.495	365.728	311.944	263.751	251.586	243.707	290.119	360.792
Capg	Macrophage-capping protein OS=Mus musculus GN=Capg PE=1 SV=2	6.81	39525.6	1758.12	P24452	10	38.35	0	CAPG_MOUSE	325.704	360.694	264.306	270.367	273.428	288.907	287.032	337.85	268.016	241.93	275.806	263.692	288.144	358.337
Slc25a31	ADP/ATP translocase 4 OS=Mus musculus GN=Slc25a31 PE=2 SV=1	9.89	35543.1	1933.08	Q3V132	6	19.06	0	ADT4_MOUSE	294.688	304.793	304.57	313.39	207.712	222.531	272.766	329.693	321.596	308.824	237.647	262.873	281.757	350.393
Gpi	Glucose-6-phosphate isomerase OS=Mus musculus GN=Gpi PE=1 SV=4	8.2	62995.1	740.679	P06745	12	28.32	0.0056	G6PI_MOUSE	232.002	235.505	334.341	394.655	262.308	257.439	180.293	204.439	346.722	364.182	275.473	236.744	277.009	344.488
Sept2	Septin-2 OS=Mus musculus GN=Sept2 PE=1 SV=2	6.09	41753.7	1547.56	P42208	10	45.15	0	SEPT2_MOUSE	288.126	256.698	277.97	258.91	279.51	305.665	221.409	280.054	255.674	270.028	320.039	287.566	275.137	342.161
Serpinf1	Pigment epithelium-derived factor OS=Mus musculus GN=Serpinf1 PE=1 SV=2	6.52	46291.2	2468.11	P97298	9	34.53	0	PEDF_MOUSE	248.95	231.607	308.945	344.544	226.453	268.364	213.979	260.891	305.607	302.211	263.864	188.342	263.646	327.871
Csrp1	Cysteine and glycine-rich protein 1 OS=Mus musculus GN=Csrp1 PE=1 SV=3	8.55	21438.8	1590.34	P97315	8	60.62	0	CSRP1_MOUSE	277.786	305.291	248.374	251.308	247.08	255.674	276.199	309.536	269.087	215.005	261.302	238.378	262.918	326.966
Slc25a4	ADP/ATP translocase 1 OS=Mus musculus GN=Slc25a4 PE=1 SV=4	10.02	33132.4	4427.65	P48962	12	46.31	0	ADT1_MOUSE	188.932	193.481	364.303	341.761	226.21	241.804	173.266	205.375	339.638	320.275	242.175	228.052	255.439	317.665
Cmtm5	CKLF-like MARVEL transmembrane domain-containing protein 5 OS=Mus musculus GN=Cmtm5 PE=1 SV=1	4.55	17617.5	4562.34	Q9D6G9	3	25	0	CKLF5_MOUSE	297.763	291.455	250.58	255.964	202.646	227.088	274.922	297.933	261.481	225.021	222.812	214.364	251.836	313.183
Atp1b1	Sodium/potassium-transporting ATPase subunit beta-1 OS=Mus musculus GN=Atp1b1 PE=1 SV=1	8.78	35593.8	1930.26	P14094	7	30.26	0	AT1B1_MOUSE	231.101	228.073	224.72	230.816	288.664	325.844	208.211	238.792	227.263	205.361	314.377	294.28	251.459	312.714
Cyb5r3	NADH-cytochrome b5 reductase 3 OS=Mus musculus GN=Cyb5r3 PE=1 SV=3	8.52	34355.8	2356.88	Q9DCN2	10	52.49	0	NB5R3_MOUSE	228.236	236.899	254.585	241.133	262.709	258.831	196.388	244.141	257.599	219.002	291.505	252.865	245.324	305.086
Hspa5	78 kDa glucose-regulated protein OS=Mus musculus GN=Hspa5 PE=1 SV=3	4.87	72536.2	849.151	P20029	13	25.95	0.0056	GRP78_MOUSE	220.659	215.041	237.489	225.939	246.997	311.084	197.475	231.682	257.869	217.334	279.756	288.277	244.134	303.605
Uqcrc1	Cytochrome b-c1 complex subunit 1, mitochondrial OS=Mus musculus GN=Uqcrc1 PE=1 SV=2	5.76	53479.1	917.905	Q9CZ13	11	33.54	0.0056	QCR1_MOUSE	170.858	173.095	246.909	220.336	276.549	320.292	155.087	175.464	253.484	308.455	348.541	268.095	243.097	302.316
Gnai2	Guanine nucleotide-binding protein G(i) subunit alpha-2 OS=Mus musculus GN=Gnai2 PE=1 SV=5	5.12	41059.3	702.289	P08752	14	57.18	0.0056	GNAI2_MOUSE	247.464	265.388	245.57	213.511	222.257	235.856	239.96	278.159	245.007	221.282	249.76	239.416	241.969	300.913
Gdi1	Rab GDP dissociation inhibitor alpha OS=Mus musculus GN=Gdi1 PE=1 SV=3	4.76	51092	2904.11	P50396	11	34	0	GDIA_MOUSE	463.379	326.222	207.318	171.854	144.682	181.395	281.22	297.691	206.078	148.758	172.101	176.737	231.453	287.835
Ywhaz	14-3-3 protein zeta/delta OS=Mus musculus GN=Ywhaz PE=1 SV=1	4.53	27942.3	5409.83	P63101	12	53.47	0	1433Z_MOUSE	179.813	180.15	229.42	238.079	266.282	290.436	166.778	190.017	227.625	225.453	288.14	254.462	228.055	283.609
Prdx5	Peroxiredoxin-5, mitochondrial OS=Mus musculus GN=Prdx5 PE=1 SV=2	9.13	22239.7	4447.91	P99029	10	56.67	0	PRDX5_MOUSE	302.293	309.507	201.612	197.653	180.623	182.522	269.614	294.335	208.885	188.581	195.246	165.727	224.717	279.458
Crip2	Cysteine-rich protein 2 OS=Mus musculus GN=Crip2 PE=1 SV=1	8.62	23525.4	11647.9	Q9DCT8	4	37.02	0	CRIP2_MOUSE	209.971	220.645	199.095	232.491	169.829	291.293	202.621	238.76	221.949	219.252	203.817	283.726	224.454	279.131
Rac1	Ras-related C3 botulinum toxin substrate 1 OS=Mus musculus GN=Rac1 PE=1 SV=1	8.57	21849.3	3269.84	P63001	6	36.46	0	RAC1_MOUSE	243.74	229.396	218.701	212.256	226.168	217.002	233.273	230.229	223.421	189.748	246.862	193.092	221.991	276.068
Plg	Plasminogen OS=Mus musculus GN=Plg PE=1 SV=3	6.17	93545.3	417.679	P20918	4	7.76	0.0086	PLMN_MOUSE	213.628	205.703	239.732	248.401	234.747	248.856	185.089	194.528	234.961	200.301	240.227	216.846	221.918	275.978
Slc25a3	Phosphate carrier protein, mitochondrial OS=Mus musculus GN=Slc25a3 PE=1 SV=1	9.49	40088.6	730.473	Q8VEM8	6	21.85	0.0056	MPCP_MOUSE	184.085	178.05	244.269	254.193	220.007	239.612	169.709	177.646	258.839	237.942	241.046	236.422	220.152	273.781
Hsd17b4	Peroxisomal multifunctional enzyme type 2 OS=Mus musculus GN=Hsd17b4 PE=1 SV=3	8.69	79995.2	430.702	P51660	6	11.29	0.0086	DHB4_MOUSE	210.647	300.388	196.354	193.312	170.075	199.018	215.192	227.832	201.979	334.623	197.212	182.861	219.124	272.503
Dcn	Decorin OS=Mus musculus GN=Dcn PE=2 SV=1	8.85	40151.2	953.293	P28654	6	22.88	0.0056	PGS2_MOUSE	163.155	174.821	218.314	219.545	250.339	272.656	155.678	182.334	218.556	204.024	281.305	261.531	216.855	269.681
Vat1l	Synaptic vesicle membrane protein VAT-1 homolog-like OS=Mus musculus GN=Vat1l PE=2 SV=2	4.79	46159.6	939.558	Q80TB8	10	30.7	0.0056	VAT1L_MOUSE	220.306	230.604	217.211	218.648	208.571	216.142	192.289	234.039	213.083	207.232	230.133	206.814	216.256	268.936
Ica	Inhibitor of carbonic anhydrase OS=Mus musculus GN=Ica PE=1 SV=1	6.91	78761.8	411.99	Q9DBD0	9	23.29	0.0086	ICA_MOUSE	217.158	220.108	225.831	259.341	217.471	183.036	196.046	223.252	224.611	183.862	230.091	173.122	212.827	264.672
Dhrs1	Dehydrogenase/reductase SDR family member 1 OS=Mus musculus GN=Dhrs1 PE=2 SV=1	8.36	34518.6	455.323	Q99L04	3	11.82	0.0086	DHRS1_MOUSE	471.684	281.591	153.323	196.991	121.328	134.935	258.982	307.553	156.925	144.574	135.815	127.335	207.586	258.155
Prdx2	Peroxiredoxin-2 OS=Mus musculus GN=Prdx2 PE=1 SV=3	5.04	21949.8	6723.81	Q61171	11	60.61	0	PRDX2_MOUSE	199.961	204.335	227.982	215.639	185.264	228.362	171.269	210.11	230.036	205.183	207.948	204.236	207.527	258.081
Gnb1	Guanine nucleotide-binding protein G(I)/G(S)/G(T) subunit beta-1 OS=Mus musculus GN=Gnb1 PE=1 SV=3	5.54	38175.4	2338.28	P62874	10	55.29	0	GBB1_MOUSE	190.366	206.234	226.625	201.688	224.342	218.818	161.34	198.279	228.108	208.068	233.554	191.539	207.413	257.94
Cfl1	Cofilin-1 OS=Mus musculus GN=Cfl1 PE=1 SV=3	8.22	18787.7	7597.78	P18760	10	62.05	0	COF1_MOUSE	198.595	198.925	181.37	227.916	249.64	183.327	190.535	202.271	169.149	201.676	237.717	145.494	198.885	247.333
Cadm3	Cell adhesion molecule 3 OS=Mus musculus GN=Cadm3 PE=1 SV=1	5.4	43363.6	760.852	Q99N28	6	29.29	0.0056	CADM3_MOUSE	197.556	189.844	193.205	186.258	186.105	207.698	177.703	196.509	210.629	185.094	220.798	187.176	194.881	242.355
Vdac1	Voltage-dependent anion-selective channel protein 1 OS=Mus musculus GN=Vdac1 PE=1 SV=3	8.67	32522.6	1446.85	Q60932	12	56.08	0	VDAC1_MOUSE	164.244	172.278	215.756	216.182	197.156	194.729	157.78	181.314	229.623	206.802	216.349	186.175	194.866	242.335
Ehd2	EH domain-containing protein 2 OS=Mus musculus GN=Ehd2 PE=1 SV=1	6.05	61345.7	652.748	Q8BH64	15	42.54	0.0056	EHD2_MOUSE	158.063	151.587	191.974	193.239	209.442	248.01	143.718	158.934	198.974	172.217	262.182	229.476	193.151	240.203
Ptrf	Polymerase I and transcript release factor OS=Mus musculus GN=Ptrf PE=1 SV=1	5.26	43953.7	1092.88	O54724	7	26.02	0	PTRF_MOUSE	132.604	147.464	188.684	174.632	245.611	259.573	131.013	152.845	184.238	162.798	269.841	247.072	191.365	237.981
Aldh1a1	Retinal dehydrogenase 1 OS=Mus musculus GN=Aldh1a1 PE=1 SV=5	7.7	55095.2	596.462	P24549	11	35.73	0.0086	AL1A1_MOUSE	140.88	129.397	161.654	152.13	144.41	211.59	122.094	133.207	169.072	298.85	386.366	200.395	187.504	233.18
Uqcrc2	Cytochrome b-c1 complex subunit 2, mitochondrial OS=Mus musculus GN=Uqcrc2 PE=1 SV=1	9.57	48292	728.702	Q9DB77	11	34	0.0056	QCR2_MOUSE	193.842	194.461	193.556	180.495	174.179	195.384	161.034	195.487	204.46	176.319	202.083	160.776	186.006	231.318
Vdac2	Voltage-dependent anion-selective channel protein 2 OS=Mus musculus GN=Vdac2 PE=1 SV=2	7.37	32360.2	1749.16	Q60930	11	60	0	VDAC2_MOUSE	152.275	149.359	193.418	194.331	181.46	217.506	155.383	159.883	200.919	175.994	206.381	192.211	181.593	225.83
Dpysl5	Dihydropyrimidinase-related protein 5 OS=Mus musculus GN=Dpysl5 PE=1 SV=1	6.65	62086.8	404.741	Q9EQF6	5	19.15	0.0086	DPYL5_MOUSE	150.972	154.137	186.992	196.709	183.736	195.159	107.468	148.161	216.242	171.596	210.179	221.693	178.587	222.091
Ldha	L-lactate dehydrogenase A chain OS=Mus musculus GN=Ldha PE=1 SV=3	7.67	36840.8	1464.05	P06151	12	47.29	0	LDHA_MOUSE	174.203	156.365	219.674	199.281	151.944	153.863	148.985	172.254	205.662	203.186	162.967	158.842	175.602	218.379
Cdc42	Cell division control protein 42 homolog OS=Mus musculus GN=Cdc42 PE=1 SV=2	6.15	21600.8	2338.43	P60766	9	48.17	0	CDC42_MOUSE	148.004	163.507	185.625	208.38	165.308	210.216	188.456	185.361	206.233	138.628	108.507	184.482	174.392	216.874
Mtco2	Cytochrome c oxidase subunit 2 OS=Mus musculus GN=Mtco2 PE=1 SV=1	4.41	26147.6	1910.43	P00405	7	48.02	0	COX2_MOUSE	122.89	147.291	236.466	193.986	197.006	151.68	132.989	140.059	219.179	189.767	218.382	135.547	173.77	216.101
Slc25a5	ADP/ATP translocase 2 OS=Mus musculus GN=Slc25a5 PE=1 SV=3	10.03	33159.5	4102.2	P51881	10	40.27	0	ADT2_MOUSE	138.396	135.85	232.492	224.58	156.654	162.655	125.963	137.162	234.067	205.109	168.345	159.274	173.379	215.614
Dusp15	Dual specificity protein phosphatase 15 OS=Mus musculus GN=Dusp15 PE=2 SV=3	9.57	26642.5	1127.84	Q8R4V2	7	42.13	0	DUS15_MOUSE	185.979	246.524	189.978	178.838	171.755	180.85	114.381	247.353	109.063	131.674	157.654	165.884	173.328	215.551
Ehd1	EH domain-containing protein 1 OS=Mus musculus GN=Ehd1 PE=1 SV=1	6.36	60659.9	379.901	Q9WVK4	6	15.17	0.0086	EHD1_MOUSE	169.645	174.433	168.87	161.12	176.775	185.271	136.446	171.017	175.869	151.484	182.788	175.906	169.135	210.337
Acat1	Acetyl-CoA acetyltransferase, mitochondrial OS=Mus musculus GN=Acat1 PE=1 SV=1	8.65	45158.4	350.322	Q8QZT1	3	12.5	0.0086	THIL_MOUSE	138.67	144.04	171.679	176.847	157.099	179.811	151.989	157.551	190.665	180.83	178.771	163.064	165.918	206.336
Acaa2	3-ketoacyl-CoA thiolase, mitochondrial OS=Mus musculus GN=Acaa2 PE=1 SV=3	8.07	42286.2	793.828	Q8BWT1	10	48.87	0.0056	THIM_MOUSE	153.677	166.552	165.921	169.872	150.588	206.866	128.638	145.619	183.859	169.315	173.239	175.06	165.767	206.148
Ckb	Creatine kinase B-type OS=Mus musculus GN=Ckb PE=1 SV=1	5.29	42998.5	843.965	Q04447	6	25.46	0.0056	KCRB_MOUSE	171.521	219.635	146.902	155.563	169.364	154.192	136.553	186.646	178.13	139.5	191.859	138.734	165.717	206.085
Atp6v1b2	V-type proton ATPase subunit B, brain isoform OS=Mus musculus GN=Atp6v1b2 PE=1 SV=1	5.45	56893.1	459.399	P62814	5	17.03	0.0086	VATB2_MOUSE	210.981	173.199	155.261	183.488	158.907	141.563	150.048	171.8	177.477	157.991	172.982	129.441	165.262	205.52
Actr3	Actin-related protein 3 OS=Mus musculus GN=Actr3 PE=1 SV=3	5.51	47813.4	572.756	Q99JY9	5	23.68	0.0086	ARP3_MOUSE	166.183	160.681	171.318	162.437	168.93	190.408	147.661	121.842	168.04	158.754	177.047	180.9	164.517	204.593
Pgam2	Phosphoglycerate mutase 2 OS=Mus musculus GN=Pgam2 PE=2 SV=3	8.77	28998.2	1460.61	O70250	11	47.83	0	PGAM2_MOUSE	125.789	126.915	240.746	223.336	116.814	133.784	109.946	123.795	252.633	217.206	133.626	127.532	161.01	200.232
Ppib	Peptidyl-prolyl cis-trans isomerase B OS=Mus musculus GN=Ppib PE=1 SV=2	10	23713.5	953.182	P24369	11	54.63	0.0056	PPIB_MOUSE	160.797	162.285	163.625	157.902	153.267	154.389	151.833	171.947	167.431	139.057	164.724	151.543	158.233	196.779
Sept11	Septin-11 OS=Mus musculus GN=Sept11 PE=1 SV=4	6.23	50036.9	416.262	Q8C1B7	2	6.96	0.0086	SEP11_MOUSE	157.431	152.929	152.599	140.731	163.928	175.703	135.281	140.046	164.889	145.406	187.331	161.363	156.47	194.586
	Ig kappa chain C region OS=Mus musculus PE=1 SV=1	5.07	11949	6773.25	P01837	5	63.21	0	IGKC_MOUSE	70.0159	66.6093	219.135	255.503	289.088	193.072	55.5943	63.2365	156.562	145.594	218.829	135.244	155.707	193.637
Rhoa	Transforming protein RhoA OS=Mus musculus GN=Rhoa PE=1 SV=1	5.73	22124.4	3701.03	Q9QUI0	7	49.22	0	RHOA_MOUSE	173.737	166.45	152.802	159.332	136.05	155.159	151.483	164.677	166.259	141.32	150.61	147.286	155.431	193.294
Aldoc	Fructose-bisphosphate aldolase C OS=Mus musculus GN=Aldoc PE=1 SV=4	6.74	39794.1	1924.44	P05063	7	22.31	0	ALDOC_MOUSE	163.924	167.799	161.522	152.267	144.655	152.449	142.682	166.086	163.717	135.733	148.128	142.016	153.415	190.787
Pfn1	Profilin-1 OS=Mus musculus GN=Pfn1 PE=1 SV=2	8.48	15128.3	6415.81	P62962	8	84.29	0	PROF1_MOUSE	210.363	207.815	125.332	123.89	125.104	131.891	181.398	210.606	142.385	118.169	127.645	127.512	152.676	189.868
Gnb2l1	Guanine nucleotide-binding protein subunit beta-2-like 1 OS=Mus musculus GN=Gnb2l1 PE=1 SV=3	7.56	35533	1149.63	P68040	12	62.15	0	GBLP_MOUSE	143.581	135.299	145.799	182.227	163.115	136.316	141.665	129.431	159.486	170.249	148.717	133.436	149.11	185.434
Mpp6	MAGUK p55 subfamily member 6 OS=Mus musculus GN=Mpp6 PE=1 SV=1	5.96	62916	471.374	Q9JLB0	7	14.83	0.0086	MPP6_MOUSE	157.865	140.71	154.544	144.321	137.168	162.323	137.999	136.354	158.086	134.924	159.312	161.805	148.784	185.028
Gnb2	Guanine nucleotide-binding protein G(I)/G(S)/G(T) subunit beta-2 OS=Mus musculus GN=Gnb2 PE=1 SV=3	5.54	38072.5	1769.83	P62880	10	55.29	0	GBB2_MOUSE	128.659	144.245	160.561	147.767	160.779	149.676	119.349	151.607	155.262	144.917	168.817	134.225	147.156	183.003
Apoa1	Apolipoprotein A-I OS=Mus musculus GN=Apoa1 PE=1 SV=2	5.39	30615.6	1930.5	Q00623	10	32.58	0	APOA1_MOUSE	100.716	106.28	149.38	151.369	166.751	187.533	101.233	111.671	158.616	140.314	210.722	174.247	146.569	182.274
Nme1	Nucleoside diphosphate kinase A OS=Mus musculus GN=Nme1 PE=1 SV=1	7.26	17321.9	6428.37	P15532	11	75	0	NDKA_MOUSE	132.772	127.6	163.748	142.617	176.988	139.888	128.05	129.59	164.886	137.706	188.89	124.184	146.41	182.075
Phgdh	D-3-phosphoglycerate dehydrogenase OS=Mus musculus GN=Phgdh PE=1 SV=3	6.1	57384	425.083	Q61753	4	10.69	0.0086	SERA_MOUSE	128.053	139.967	129.053	128.979	148.464	166.764	134.388	139.894	138.873	125.662	166.124	166.243	142.705	177.469
Slc25a12	Calcium-binding mitochondrial carrier protein Aralar1 OS=Mus musculus GN=Slc25a12 PE=1 SV=1	8.29	74968.9	336.409	Q8BH59	2	7.83	0.0086	CMC1_MOUSE			153.392	158.456	103.2	138.451			172.524	164.751	125.877	123.532	142.523	177.242
Vat1	Synaptic vesicle membrane protein VAT-1 homolog OS=Mus musculus GN=Vat1 PE=1 SV=3	5.92	43324.8	591.86	Q62465	9	40.39	0.0086	VAT1_MOUSE	133.669	129.363	144.427	143.73	138.82	158.303	119.855	133.241	150.311	134.767	160.3	138.428	140.435	174.645
Cnn3	Calponin-3 OS=Mus musculus GN=Cnn3 PE=1 SV=1	5.34	36599.9	504.579	Q9DAW9	6	27.27	0.0086	CNN3_MOUSE	150.232	125.688	136.044	141.169	121.466	148.178	123.063	151.34	159.99	143.838	142.764	130.607	139.532	173.522
Sept7	Septin-7 OS=Mus musculus GN=Sept7 PE=1 SV=1	8.77	50892.1	793.692	O55131	9	30.05	0.0056	SEPT7_MOUSE	129.346	115.671	135.32	148.467	138.919	161.808	111.943	116.041	145.505	134.742	161.623	150.175	137.463	170.949
Crmp1	Dihydropyrimidinase-related protein 1 OS=Mus musculus GN=Crmp1 PE=1 SV=1	6.78	62510	2671.18	P97427	13	42.48	0	DPYL1_MOUSE	113.221	141.587	149.72	149.474	136.645	137.715	102.457	120.105	153.747	152.987	156.12	129.859	136.97	170.336
Ctsd	Cathepsin D OS=Mus musculus GN=Ctsd PE=1 SV=1	6.77	45410.1	692.211	P18242	4	16.34	0.0056	CATD_MOUSE	135.991	130.064	144.177	127.885	137.878	139.95	117.325	131.834	150.712	122.668	172.11	131.311	136.825	170.156
Acat2	Acetyl-CoA acetyltransferase, cytosolic OS=Mus musculus GN=Acat2 PE=1 SV=2	7.24	41754.1	938.921	Q8CAY6	9	47.61	0.0056	THIC_MOUSE	154.155	182.657	128.202	131.503	101.241	122.279	129.398	189.541	142.497	122.289	116.473	113.283	136.127	169.287
Ywhae	14-3-3 protein epsilon OS=Mus musculus GN=Ywhae PE=1 SV=1	4.44	29345	1757.75	P62259	11	49.02	0	1433E_MOUSE	119.633	120.909	141.398	129.408	140.349	149.096	109.544	126.104	152.939	125.102	164.571	144.703	135.313	168.275
Atp1b3	Sodium/potassium-transporting ATPase subunit beta-3 OS=Mus musculus GN=Atp1b3 PE=1 SV=1	8.63	32117.9	927.97	P97370	2	17.27	0.0056	AT1B3_MOUSE	155.821	192.514	104.759	94.88	107.987	133.501	167.984	195.351	108.066	91.4913	128.405	134.166	134.577	167.36
Hadhb	Trifunctional enzyme subunit beta, mitochondrial OS=Mus musculus GN=Hadhb PE=1 SV=1	9.73	51671.6	435.312	Q99JY0	5	14.95	0.0086	ECHB_MOUSE	112.571	115.186	147.954	147.481	125.355	143.102	103.082	120.025	162.991	139.522	144.448	149.564	134.274	166.983
Gjc3	Gap junction gamma-3 protein OS=Mus musculus GN=Gjc3 PE=2 SV=2	8.37	30805.9	354.913	Q921C1	4	20.45	0.0086	CXG3_MOUSE	131.053	129.866	145.418	124.783	129.459	147.252	112.504	126.753	144.446	125.44	151.168	133.235	133.448	165.956
Ddah1	N(G),N(G)-dimethylarginine dimethylaminohydrolase 1 OS=Mus musculus GN=Ddah1 PE=1 SV=3	5.56	31780.2	1146.78	Q9CWS0	11	47.37	0	DDAH1_MOUSE	126.623	132.366	131.567	138.767	118.339	152.315	118.501	135.471	140.199	129.135	139.389	138.057	133.394	165.889
Mapk1	Mitogen-activated protein kinase 1 OS=Mus musculus GN=Mapk1 PE=1 SV=3	6.53	41674.9	534.22	P63085	2	9.5	0.0086	MK01_MOUSE	109.895	128.726	140.137	143.905	145.59	110.27	152.69	121.781	150.405	135.491	148.302	105.049	132.687	165.01
Ldhc	L-lactate dehydrogenase C chain OS=Mus musculus GN=Ldhc PE=1 SV=2	8.26	36254.1	525.898	P00342	2	8.13	0.0086	LDHC_MOUSE	161.523	145.911	124.029	118.486	123.64	103.97	126.808	157.239	128.877	119.856	144.234	109.502	130.34	162.09
Ndufs1	NADH-ubiquinone oxidoreductase 75 kDa subunit, mitochondrial OS=Mus musculus GN=Ndufs1 PE=1 SV=2	5.37	80803.5	361.774	Q91VD9	4	7.7	0.0086	NDUS1_MOUSE	102.834	99.1329	152.652	123.261	119.108	151.591	102.199	111.877	160.105	149.682	144.282	144.54	130.105	161.799
Calr	Calreticulin OS=Mus musculus GN=Calr PE=1 SV=1	4.14	48165.7	421.222	P14211	4	18.99	0.0086	CALR_MOUSE	105.229	98.5893	156.29	121.381	165.197	135.174	100.035	97.5519	148.986	113.851	164.71	122.425	127.452	158.499
Tubb6	Tubulin beta-6 chain OS=Mus musculus GN=Tubb6 PE=1 SV=1	4.59	50546.7	7392.41	Q922F4	16	44.07	0	TBB6_MOUSE	93.8012	93.5066	114.675	116.714	164.745	169.06	86.411	94.7262	124.201	108.161	166.665	169.483	125.179	155.673
Ezr	Ezrin OS=Mus musculus GN=Ezr PE=1 SV=3	5.73	69521	607.318	P26040	10	19.11	0.0086	EZRI_MOUSE	112.464	126.92	130.066	97.3568	107.661	163.998	91.2199	103.817	139.503	124.633	140.482	146.215	123.695	153.827
Gstp1	Glutathione S-transferase P 1 OS=Mus musculus GN=Gstp1 PE=1 SV=2	7.96	23780.3	1341.64	P19157	8	53.33	0	GSTP1_MOUSE	141.274	141.266	112.468	109.92	96.2734	122.458	124.405	152.922	122.49	103.993	112.43	110.777	120.89	150.339
Gatm	Glycine amidinotransferase, mitochondrial OS=Mus musculus GN=Gatm PE=1 SV=1	7.8	48810.6	815.527	Q9D964	7	28.61	0.0056	GATM_MOUSE	113.632	126.879	128.437	120.029	104.101	125.195	102.6	118.974	134.793	117.266	123.658	118.254	119.485	148.592
Apoh	Beta-2-glycoprotein 1 OS=Mus musculus GN=Apoh PE=1 SV=1	8.12	39930.5	493.646	Q01339	3	14.78	0.0086	APOH_MOUSE	125.165	121.281	109.674	104.235	117.68	146.69	112.804	100.535	121.69	100.81	127.182	137.244	118.749	147.677
Cav1	Caveolin-1 OS=Mus musculus GN=Cav1 PE=1 SV=1	5.59	20709.8	1859.56	P49817	7	52.81	0	CAV1_MOUSE	101.52	108.065	114.045	108.668	141.655	124.714	78.6427	102.171	120.419	104.709	152.044	120.552	114.767	142.724
Tubb1	Tubulin beta-1 chain OS=Mus musculus GN=Tubb1 PE=1 SV=1	4.78	51125.4	1665.6	A2AQ07	7	12.64	0	TBB1_MOUSE	102.246	111.248	103.296	99.0972	112.558	138.272	97.3835	111.602	115.584	106.248	125.696	133.016	113.02	140.552
Tagln	Transgelin OS=Mus musculus GN=Tagln PE=1 SV=3	9.22	22632.9	1263.06	P37804	10	55.22	0	TAGL_MOUSE	102.508	108.297	109.971	110.063	131.677	117.773	92.1614	103.238	106.798	105.751	155.919	105.989	112.512	139.92
Paics	Multifunctional protein ADE2 OS=Mus musculus GN=Paics PE=1 SV=4	6.97	47747.5	485.658	Q9DCL9	5	21.18	0.0086	PUR6_MOUSE	107.021	104.452	122.398	112.455	118.357	111.047	93.2737	110.582	125.466	104.819	119.217	113.621	111.892	139.15
Gpd1	Glycerol-3-phosphate dehydrogenase [NAD(+)], cytoplasmic OS=Mus musculus GN=Gpd1 PE=1 SV=3	6.8	38200.1	448.893	P13707	5	22.92	0.0086	GPDA_MOUSE	137.731	68.8386	120.809	112.448	80.4126	151	164.715	39.7878	104.669	136.035	81.7698	142.562	111.731	138.949
Cox4i1	Cytochrome c oxidase subunit 4 isoform 1, mitochondrial OS=Mus musculus GN=Cox4i1 PE=1 SV=2	9.59	19587.5	1109.6	P19783	3	22.49	0	COX41_MOUSE	91.2227	95.0193	115.404	117.99	111.22	121.543	87.0158	92.9702	158.424	108.214	116.567	123.281	111.573	138.752
Anxa5	Annexin A5 OS=Mus musculus GN=Anxa5 PE=1 SV=1	4.62	35809.5	1141.07	P48036	8	30.41	0	ANXA5_MOUSE	117.982	118.55	104.252	110.434	108.874	118.535	104.691	108.653	104.128	104.749	121.967	110.712	111.127	138.198
Ldhb	L-lactate dehydrogenase B chain OS=Mus musculus GN=Ldhb PE=1 SV=2	5.63	36857.5	965.257	P16125	7	24.85	0.0056	LDHB_MOUSE	129.072	126.428	96.5644	93.4861	88.0703	105.682	117.498	134.938	99.2938	85.9006	104.492	99.2009	106.719	132.716
Gstm2	Glutathione S-transferase Mu 2 OS=Mus musculus GN=Gstm2 PE=1 SV=2	7.44	25887.9	2400.39	P15626	8	44.04	0	GSTM2_MOUSE	97.7939	92.8487	108.537	122.643	107.491	104.448	91.3637	94.5401	121.859	111.615	114.834	99.5492	105.627	131.358
Rufy3	Protein RUFY3 OS=Mus musculus GN=Rufy3 PE=1 SV=1	5.2	53292.3	317.9	Q9D394	3	7.46	0.0086	RUFY3_MOUSE	105.666	91.9781	112.083	112.588	98.3875	108.764	90.3767	114.145	115.608	89.628	115.891	111.081	105.516	131.22
Mapk3	Mitogen-activated protein kinase 3 OS=Mus musculus GN=Mapk3 PE=1 SV=5	6.14	43408.7	917.593	Q63844	4	15.79	0.0056	MK03_MOUSE	80.5446	99.8203	108.391	106.906	104.743	105.548	90.499	100.691	111.33	98.6288	110.66	84.1698	100.161	124.56
Cycs	Cytochrome c, somatic OS=Mus musculus GN=Cycs PE=1 SV=2	10	11719.5	4046.29	P62897	4	44.76	0	CYC_MOUSE	99.4334	99.116	131.653	114.544	103.792	64.9195	71.6827	99.9551	126.991	108.855	117.404	60.087	99.8694	124.198
Ywhag	14-3-3 protein gamma OS=Mus musculus GN=Ywhag PE=1 SV=2	4.61	28473.7	2862.49	P61982	9	39.68	0	1433G_MOUSE	81.6844	74.6687	100.384	103.805	112.961	113.555	76.4903	92.1781	102.998	87.083	132.541	119.731	99.84	124.161
Atp5f1	ATP synthase F(0) complex subunit B1, mitochondrial OS=Mus musculus GN=Atp5f1 PE=1 SV=1	9.39	29062.9	518.787	Q9CQQ7	2	8.98	0.0086	AT5F1_MOUSE	88.4922	93.1129	76.8733	128.189	110.3	100.723	81.5667	81.842	111.09	111.209	116.62	97.1234	99.7618	124.064
Dynll1	Dynein light chain 1, cytoplasmic OS=Mus musculus GN=Dynll1 PE=1 SV=1	7.23	10537	3746.16	P63168	2	32.58	0	DYL1_MOUSE	143.23	139.907	82.4807	84.3984	82.307	96.5254	128.256	87.3715	92.8085	77.9039	91.7481	88.2838	99.6018	123.865
Rplp0	60S acidic ribosomal protein P0 OS=Mus musculus GN=Rplp0 PE=1 SV=3	5.85	34387.6	537.764	P14869	4	19.56	0.0086	RLA0_MOUSE	90.0253	78.7292	97.2808	101.286	115.097	121.313	82.3183	91.7472	100.854	88.7202	114.368	110.743	99.3735	123.581
Hsp90aa1	Heat shock protein HSP 90-alpha OS=Mus musculus GN=Hsp90aa1 PE=1 SV=4	4.74	85187.2	748.521	P07901	9	16.23	0.0056	HS90A_MOUSE	84.5905	79.2613	101.416	85.8276	108.281	129.529	74.232	74.072	133.68	106.924	103.637	107.731	99.0984	123.239
Rab10	Ras-related protein Rab-10 OS=Mus musculus GN=Rab10 PE=1 SV=1	8.57	22769.1	1310.24	P61027	3	21	0	RAB10_MOUSE	71.0042	67.0298	102.263	114.231	112.624	125.396	62.0678	65.3168	124.605	90.4361	124.69	125.05	98.7261	122.776
Hist1h4a	Histone H4 OS=Mus musculus GN=Hist1h4a PE=1 SV=2	11.77	11367.4	3424.55	P62806	6	57.28	0	H4_MOUSE	78.6705	77.8805	109.897	115.346	88.935	113.753	70.1229	81.3711	116.551	105.243	115.185	102.921	97.9895	121.86
Rab7a	Ras-related protein Rab-7a OS=Mus musculus GN=Rab7a PE=1 SV=2	6.57	23774.9	1362.41	P51150	10	53.62	0	RAB7A_MOUSE	92.9419	100.825	90.4231	85.6262	88.5997	101.989	85.813	102.14	98.271	83.2856	102.771	99.3585	94.3369	117.318
Ppic	Peptidyl-prolyl cis-trans isomerase C OS=Mus musculus GN=Ppic PE=1 SV=1	7.36	22908.3	476.578	P30412	3	27.36	0.0086	PPIC_MOUSE	93.9334	104.276	105.929	115.187	73.8744	89.1464	55.8197	80.1594	127.412	115.237	96.1102	74.2587	94.2786	117.245
Hspa2	Heat shock-related 70 kDa protein 2 OS=Mus musculus GN=Hspa2 PE=1 SV=2	5.34	69926.9	2207.35	P17156	9	14.85	0	HSP72_MOUSE	81.1404	80.282	95.5075	96.9261	98.9551	116.684	71.6026	79.1419	98.7523	90.9944	106.392	105.374	93.4793	116.251
Rap1b	Ras-related protein Rap-1b OS=Mus musculus GN=Rap1b PE=2 SV=2	5.46	21052.9	2629.28	Q99JI6	8	51.63	0	RAP1B_MOUSE	96.569	94.5568	86.3069	109.475	92.5495	84.4976	89.0922	96.0993	83.3919	91.2262	91.7996	79.1404	91.2254	113.448
Ube2n	Ubiquitin-conjugating enzyme E2 N OS=Mus musculus GN=Ube2n PE=1 SV=1	6.15	17194.9	1417.91	P61089	5	41.45	0	UBE2N_MOUSE	95.8815	98.121	92.7217	77.994	83.6143	84.0968	97.9401	97.6262	99.9778	74.0129	98.855	86.257	90.5915	112.66
Cntf	Ciliary neurotrophic factor OS=Mus musculus GN=Cntf PE=2 SV=1	6.05	22643.8	797.978	P51642	7	40.91	0.0056	CNTF_MOUSE	102.832	102.155	74.3353	68.0567	77.7407	81.1274	90.3124	108.159	75.0867	65.3041	85.4062	77.9802	84.0413	104.514
Hsd17b10	3-hydroxyacyl-CoA dehydrogenase type-2 OS=Mus musculus GN=Hsd17b10 PE=1 SV=4	8.78	27532.7	1101.51	O08756	6	37.55	0	HCD2_MOUSE	80.2546	79.0959	79.4588	86.2781	68.8183	98.5788	87.563	96.9082	83.4948	75.3734	80.4931	86.4103	83.5606	103.916
Pdhb	Pyruvate dehydrogenase E1 component subunit beta, mitochondrial OS=Mus musculus GN=Pdhb PE=1 SV=1	6.44	39279.4	399.823	Q9D051	3	11.98	0.0086	ODPB_MOUSE	74.0279	63.6223	81.9888	107.441	66.8954	86.2421	66.0464	67.4262	93.7888	86.0545	89.238	87.2531	80.8353	100.527
Cyc1	Cytochrome c1, heme protein, mitochondrial OS=Mus musculus GN=Cyc1 PE=1 SV=1	9.37	35555.8	534.103	Q9D0M3	3	18.46	0.0086	CY1_MOUSE	59.5736	56.8879	100.06	102.083	80.3871	91.0379	45.282	60.1733	101.021	96.1124	92.7394	79.7986	80.4297	100.022
Gnaq	Guanine nucleotide-binding protein G(q) subunit alpha OS=Mus musculus GN=Gnaq PE=1 SV=4	5.34	42443.3	529.227	P21279	3	11.7	0.0086	GNAQ_MOUSE	63.7507	54.8274	87.5644	95.7778	85.9893	85.0221	50.5007	54.4913	83.5861	105.46	94.4627	77.7079	78.2617	97.3264
Ywhaq	14-3-3 protein theta OS=Mus musculus GN=Ywhaq PE=1 SV=1	4.49	28063.5	2213.36	P68254	12	55.51	0	1433T_MOUSE	64.0933	57.1964	83.5308	77.1243	89.6549	88.4093	58.6584	69.7364	86.8365	71.0856	104.273	83.1779	77.8147	96.7705
Ube2v1	Ubiquitin-conjugating enzyme E2 variant 1 OS=Mus musculus GN=Ube2v1 PE=1 SV=1	8.22	16468.8	1257.42	Q9CZY3	5	42.86	0	UB2V1_MOUSE	89.9457	89.1253	78.7674	80.8431	62.9889	61.5265	80.8494	93.08	87.0736	74.5688	70.1693	56.4636	77.1168	95.9026
Ndufa9	NADH dehydrogenase [ubiquinone] 1 alpha subcomplex subunit 9, mitochondrial OS=Mus musculus GN=Ndufa9 PE=1 SV=2	10.06	42639.3	353.487	Q9DC69	2	11.67	0.0086	NDUA9_MOUSE			100.703	94.2154	70.5499	45.4601			95.5199	93.1661	77.2316	38.6581	76.938	95.6802
Tagln2	Transgelin-2 OS=Mus musculus GN=Tagln2 PE=1 SV=4	8.44	22566.6	1406.42	Q9WVA4	12	63.82	0	TAGL2_MOUSE	101.245	100.008	73.6072	56.6155	60.9739	66.9587	93.4397	107.136	75.8237	58.2629	67.1292	56.5451	76.4787	95.1091
Prnp	Major prion protein OS=Mus musculus GN=Prnp PE=1 SV=2	9.55	28148.6	526.72	P04925	3	12.6	0.0086	PRIO_MOUSE	90.5282	85.7028	74.56	69.284	65.4664	75.8077	80.6567	89.2466	75.9913	66.1927	69.0923	72.8822	76.2842	94.8672
Eno2	Gamma-enolase OS=Mus musculus GN=Eno2 PE=1 SV=2	4.8	47638.9	7764.24	P17183	7	28.8	0	ENOG_MOUSE	49.6176	70.9417	90.2344	90.7472	69.3502	73.543	64.5598	70.5302	99.627	85.1373	73.8438	73.1966	75.9441	94.4442
Ina	Alpha-internexin OS=Mus musculus GN=Ina PE=1 SV=3	5.18	55553.7	776.316	P46660	6	15.97	0.0056	AINX_MOUSE	62.2818	47.7073	53.4112	58.9563	70.5707	126.953	108.563	49.1803	50.9894	48.8361	77.4613	123.162	73.1727	90.9977
Rab5a	Ras-related protein Rab-5A OS=Mus musculus GN=Rab5a PE=1 SV=1	8.25	23826.8	1534.28	Q9CQD1	7	48.37	0	RAB5A_MOUSE	80.3228	92.7614	69.8546	64.5388	64.1498	75.7341	66.5177	85.1638	73.1178	63.1464	69.7513	69.1226	72.8484	90.5944
Gnai1	Guanine nucleotide-binding protein G(i) subunit alpha-1 OS=Mus musculus GN=Gnai1 PE=2 SV=1	5.59	40931.4	782.266	B2RSH2	11	38.42	0.0056	GNAI1_MOUSE	72.569	74.7167	74.4724	74.295	68.5733	80.0528	54.3629	56.0171	74.0269	69.628	80.849	76.2556	71.3182	88.6915
Rap1a	Ras-related protein Rap-1A OS=Mus musculus GN=Rap1a PE=2 SV=1	6.53	21329.4	2495.04	P62835	9	59.78	0	RAP1A_MOUSE	74.3513	71.7834	68.2211	80.4682	69.5532	69.5769	67.3491	75.8672	66.4965	68.8361	71.107	64.3027	70.6594	87.8721
Park7	Protein deglycase DJ-1 OS=Mus musculus GN=Park7 PE=1 SV=1	6.36	20249.5	1066.35	Q99LX0	4	38.1	0	PARK7_MOUSE	90.536	90.0721	69.5457	61.6291	49.9469	65.8944	85.054	89.5972	65.4238	54.8106	66.6868	53.1598	70.1964	87.2963
Hadh	Hydroxyacyl-coenzyme A dehydrogenase, mitochondrial OS=Mus musculus GN=Hadh PE=1 SV=2	9	34635	749.301	Q61425	2	12.74	0.0056	HCDH_MOUSE			88.5939	75.963	76.0131	49.148			91.5544	73.9213	81.3739	22.0548	69.8278	86.838
Cyb5a	Cytochrome b5 OS=Mus musculus GN=Cyb5a PE=1 SV=2	4.76	15241	886.56	P56395	4	41.04	0.0056	CYB5_MOUSE	69.2449	66.7046	63.7128	65.3785	72.7045	71.3139	61.5065	70.6221	66.0253	61.45	78.7782	69.5485	68.0825	84.6675
Rps2	40S ribosomal protein S2 OS=Mus musculus GN=Rps2 PE=2 SV=3	10.65	31516.5	778.146	P25444	3	10.58	0.0056	RS2_MOUSE	57.6183	60.5877	67.7451	66.0988	70.1167	83.7149	60.5014	60.586	73.7538	68.5512	79.4456	59.8742	67.3828	83.7974
Hnrnpk	Heterogeneous nuclear ribonucleoprotein K OS=Mus musculus GN=Hnrnpk PE=1 SV=1	5.22	51261.5	338.864	P61979	2	6.26	0.0086	HNRPK_MOUSE	60.204	65.4293	55.6691	72.2497	58.7332	84.423	59.917	64.2582	55.901	48.8732	80.0628	79.401	65.4268	81.3649
Rps4x	40S ribosomal protein S4, X isoform OS=Mus musculus GN=Rps4x PE=2 SV=2	10.59	29825.9	508.188	P62702	3	16.73	0.0086	RS4X_MOUSE	55.3695	57.7328	70.0051	60.4064	66.3142	74.985	36.4912	60.1289	83.4117	67.4034	72.916	76.6	65.147	81.0169
Etfa	Electron transfer flavoprotein subunit alpha, mitochondrial OS=Mus musculus GN=Etfa PE=1 SV=2	8.49	35351.6	633.494	Q99LC5	4	24.02	0.0086	ETFA_MOUSE	61.1714	64.319	63.0185	81.9929	54.899	63.8456	64.0463	61.2638	69.6394	63.9478	61.7523	63.0823	64.4149	80.1064
Rab5c	Ras-related protein Rab-5C OS=Mus musculus GN=Rab5c PE=1 SV=2	8.58	23640.7	677.003	P35278	6	41.67	0.0056	RAB5C_MOUSE	72.3781	80.9809	60.2882	46.4979	55.5849	59.664	56.1753	84.4168	66.1747	57.7908	64.3938	56.0774	63.3686	78.8052
Rpl18	60S ribosomal protein L18 OS=Mus musculus GN=Rpl18 PE=2 SV=3	12.19	21701.6	495.39	P35980	2	13.83	0.0086	RL18_MOUSE	55.5119	54.974	62.9764	60.167	66.6297	80.8693	47.8726	58.4553	63.8102	57.0921	76.884	72.4958	63.1449	78.5271
Atp5h	ATP synthase subunit d, mitochondrial OS=Mus musculus GN=Atp5h PE=1 SV=3	5.37	18806.5	1326.14	Q9DCX2	5	48.45	0	ATP5H_MOUSE	51.7753	55.796	80.7089	70.3998	68.2727	54.3802	47.1409	51.959	78.9401	68.8073	72.2344	51.9462	62.6967	77.9698
Gsk3b	Glycogen synthase kinase-3 beta OS=Mus musculus GN=Gsk3b PE=1 SV=2	8.89	47223.6	450.425	Q9WV60	2	12.62	0.0086	GSK3B_MOUSE	66.8392	60.5134	71.2776	56.1502	57.4668	60.1424	57.2514	67.194	75.9724	54.3294	61.3969	57.6479	62.1818	77.3294
Ywhab	14-3-3 protein beta/alpha OS=Mus musculus GN=Ywhab PE=1 SV=3	4.57	28200.5	2010.96	Q9CQV8	9	41.06	0	1433B_MOUSE	52.2471	54.0394	63.8033	62.0663	66.6491	67.513	48.4235	52.3453	66.5888	59.649	75.8249	68.7	61.4875	76.4659
Rab1A	Ras-related protein Rab-1A OS=Mus musculus GN=Rab1A PE=1 SV=3	5.85	22905.9	1278.6	P62821	4	32.2	0	RAB1A_MOUSE	66.0147	66.3468	52.3059	49.1049	51.328	62.8568	60.5639	76.1497	62.3775	50.7267	62.3648	63.0024	60.2618	74.9417
Phb	Prohibitin OS=Mus musculus GN=Phb PE=1 SV=1	5.43	29877.1	455.157	P67778	2	10.29	0.0086	PHB_MOUSE	55.306	54.6598	58.4956	59.0137	51.6401	64.7213	46.1722	60.5114	67.4213	55.0053	58.7356	61.486	57.764	71.8354
Ube2l3	Ubiquitin-conjugating enzyme E2 L3 OS=Mus musculus GN=Ube2l3 PE=2 SV=1	8.8	18032.7	1257.45	P68037	3	42.21	0	UB2L3_MOUSE	73.4443	54.8513	75.0006	43.1807	45.1434	30.898	55.4618	75.7684	70.1892	53.8694	54.1315	26.698	54.8864	68.2568
Slc25a10	Mitochondrial dicarboxylate carrier OS=Mus musculus GN=Slc25a10 PE=1 SV=2	9.53	32171.2	473.36	Q9QZD8	2	13.59	0.0086	DIC_MOUSE	32.6042	32.346	65.4378	76.1233	60.8598	70.3928	30.9483	34.6404	53.9684	77.0707	63.3686	54.0871	54.3206	67.5532
Rab14	Ras-related protein Rab-14 OS=Mus musculus GN=Rab14 PE=1 SV=3	5.8	24125.1	865.6	Q91V41	3	24.65	0.0056	RAB14_MOUSE	56.4314	60.0259	54.9201	58.0387	47.7562	51.7584	52.2852	59.3033	45.2641	53.6971	51.9533	48.2834	53.3097	66.2961
Fkbp1a	Peptidyl-prolyl cis-trans isomerase FKBP1A OS=Mus musculus GN=Fkbp1a PE=1 SV=2	8.66	11979.7	701.236	P26883	2	25	0.0056	FKB1A_MOUSE	60.1186	55.6433	62.9385	47.1922	58.4445	30.5397	59.524	53.4025	69.461	45.3604	64.5425	31.7308	53.2415	66.2112
Arhgdia	Rho GDP-dissociation inhibitor 1 OS=Mus musculus GN=Arhgdia PE=1 SV=3	4.91	23464.5	736.794	Q99PT1	2	15.2	0.0056	GDIR1_MOUSE	60.9919	61.7712	49.0512	46.3906	37.6246	46.2538	66.602	71.0437	43.0433	35.9317	41.6246	42.6573	50.2488	62.4895
Cfl2	Cofilin-2 OS=Mus musculus GN=Cfl2 PE=1 SV=1	8.16	18823.7	1434.67	P45591	6	45.18	0	COF2_MOUSE	52.6915	54.4761	49.6717	49.1795	45.7555	48.888	51.2398	57.9946	51.7232	44.0618	51.2206	45.3961	50.1915	62.4183
Sfxn3	Sideroflexin-3 OS=Mus musculus GN=Sfxn3 PE=1 SV=1	9.78	35691.4	434.272	Q91V61	2	10.59	0.0086	SFXN3_MOUSE	39.2243	55.2265	50.7072	51.2456	39.6137	52.4159		32.4067	50.6767	49.7896	49.8552	67.8414	49.0003	60.9368
Des	Desmin OS=Mus musculus GN=Des PE=1 SV=3	5.03	53554.9	1090.46	P31001	4	11.09	0	DESM_MOUSE	34.1352	32.0268	51.9164	54.5466	58.2032	64.0089	31.7794	33.5119	54.9595	50.7762	64.4726	56.4202	48.8964	60.8077
Rps7	40S ribosomal protein S7 OS=Mus musculus GN=Rps7 PE=2 SV=1	10.58	22126.9	925.808	P62082	3	23.2	0.0056	RS7_MOUSE	43.1053	44.8286	49.0051	46.2098	60.5722	56.8786	41.665	47.511	36.2579	46.4009	63.2239	47.3838	48.5868	60.4227
Rab1b	Ras-related protein Rab-1B OS=Mus musculus GN=Rab1b PE=1 SV=1	5.39	22358.3	609.977	Q9D1G1	2	15.42	0.0086	RAB1B_MOUSE	42.3626	51.0112	46.5534	45.0347	45.9862	56.6303	40.348	51.5	52.0526	39.4711	45.6645	45.4221	46.8364	58.2458
Marcks	Myristoylated alanine-rich C-kinase substrate OS=Mus musculus GN=Marcks PE=1 SV=2	4.12	29718.4	522.554	P26645	2	26.86	0.0086	MARCS_MOUSE	56.2663	55.3342	41.8453	41.8391	39.7323	47.3824	56.3056	57.1464	42.5188	37.8127	38.6621	44.8511	46.6413	58.0033
Ywhah	14-3-3 protein eta OS=Mus musculus GN=Ywhah PE=1 SV=2	4.61	28382.9	1850.01	P68510	9	41.87	0	1433F_MOUSE	39.1884	38.2845	48.2036	48.3398	55.1899	52.4424	34.7048	41.2909	48.2865	44.5769	59.6543	47.4777	46.47	57.7901
Ighv3-6	Ig heavy chain V region 3-6 OS=Mus musculus GN=Ighv3-6 PE=1 SV=1	9.06	13209	1928.63	P18531	2	31.03	0	HVM60_MOUSE			40.5309	31.0982	55.3824	45.6285			41.0822	29.6386	59.0296	61.084	45.4343	56.5022
Lyz2	Lysozyme C-2 OS=Mus musculus GN=Lyz2 PE=1 SV=2	8.87	17145.2	486.891	P08905	2	27.03	0.0086	LYZ2_MOUSE	55.3961	58.1219	44.649	41.7758	36.3917	34.5453	52.9187	56.7762	44.4388	39.4374	41.3641	32.0029	44.8182	55.7359
Gng2	Guanine nucleotide-binding protein G(I)/G(S)/G(O) subunit gamma-2 OS=Mus musculus GN=Gng2 PE=2 SV=2	8.25	7964.22	5817.98	P63213	4	52.11	0	GBG2_MOUSE	46.1119	45.1528	40.1917	39.1763	40.3169	49.3175	42.6738	46.8233	43.7357	36.7515	44.1973	47.1358	43.4654	54.0536
Hrsp12	Ribonuclease UK114 OS=Mus musculus GN=Hrsp12 PE=1 SV=3	9.13	14312.5	557.435	P52760	2	19.26	0.0086	UK114_MOUSE	57.4723	55.9824	48.5229	31.0473	32.6047	25.6223	44.36	47.4611	44.4829	39.5214	38.0646	22.2448	40.6156	50.5096
Pebp1	Phosphatidylethanolamine-binding protein 1 OS=Mus musculus GN=Pebp1 PE=1 SV=3	5.03	21001.6	829.014	P70296	2	26.2	0.0056	PEBP1_MOUSE	53.8503	47.4044	40.9948	28.3102	32.2171	30.0563	46.5141	48.8916	38.5042	26.4361	38.0396	27.4016	38.2184	47.5284
	Ig heavy chain V region AC38 205.12 OS=Mus musculus PE=1 SV=1	7	13048.4	1239.42	P06330	4	46.61	0	HVM51_MOUSE	51.8943	55.0508	30.3263	30.8807	29.1561	30.9303	43.7551	55.214	33.7106	29.9462	34.3546	30.6739	37.9911	47.2458
Myl12b	Myosin regulatory light chain 12B OS=Mus musculus GN=Myl12b PE=1 SV=2	4.49	19836.2	430.424	Q3THE2	2	16.28	0.0086	ML12B_MOUSE	31.6684	32.9864	39.5897	31.1009	43.5295	43.3763	29.4259	32.4636	38.1935	30.5212	47.8185	40.7823	36.788	45.7497
Atp5j2	ATP synthase subunit f, mitochondrial OS=Mus musculus GN=Atp5j2 PE=1 SV=3	10.23	10401.3	833	P56135	2	26.14	0.0056	ATPK_MOUSE	34.3246	33.2862	43.178	41.4624	36.604	18.1162	30.8279	33.3548	40.057	37.5708	42.49	25.6615	34.7445	43.2083
Basp1	Brain acid soluble protein 1 OS=Mus musculus GN=Basp1 PE=1 SV=3	4.29	22086.6	587.507	Q91XV3	3	34.07	0.0086	BASP1_MOUSE	52.8258	45.1922	27.8249	30.984	24.7623	27.871	42.5946	43.8905	30.8315	30.6635	28.5566	26.5992	34.383	42.7588
Cnrip1	CB1 cannabinoid receptor-interacting protein 1 OS=Mus musculus GN=Cnrip1 PE=1 SV=1	8.19	18726.4	495.117	Q5M8N0	3	28.05	0.0086	CNRP1_MOUSE	32.4229	34.6319	30.8294	31.8739	27.68	30.7533	34.0734	36.4382	31.1031	33.1459	34.5702	29.0737	32.2163	40.0643
Rpl12	60S ribosomal protein L12 OS=Mus musculus GN=Rpl12 PE=1 SV=2	9.9	17975.7	524.171	P35979	3	28.48	0.0086	RL12_MOUSE	30.5921	29.7364	31.3935	28.8867	32.3777	35.1791	26.5931	41.909	31.1987	26.4125	36.6545	33.6102	32.0453	39.8516
Rps13	40S ribosomal protein S13 OS=Mus musculus GN=Rps13 PE=1 SV=2	10.94	17222.3	1107.64	P62301	3	24.5	0	RS13_MOUSE	31.7505	22.3197	34.988	32.0895	36.1189	38.1676	24.1982	26.8259	32.9042	29.9584	38.804	34.838	31.9136	39.6878
Gstp2	Glutathione S-transferase P 2 OS=Mus musculus GN=Gstp2 PE=2 SV=2	7.96	23708.2	1220.48	P46425	6	40.48	0	GSTP2_MOUSE	36.7416	35.6544	29.1812	28.3528	25.7563	30.0071	31.7936	36.9873	31.4221	26.7178	29.8665	27.2482	30.8107	38.3163
Rhog	Rho-related GTP-binding protein RhoG OS=Mus musculus GN=Rhog PE=2 SV=1	8.08	21764.7	1022.19	P84096	2	9.95	0.0056	RHOG_MOUSE	24.5637	25.0093	31.6148	42.1148	28.7758	34.5821	19.0878	21.7334	38.245	31.0533	34.3197	27.3163	29.868	37.1439
Pgam1	Phosphoglycerate mutase 1 OS=Mus musculus GN=Pgam1 PE=1 SV=3	6.79	28946.1	399.353	Q9DBJ1	2	9.84	0.0086	PGAM1_MOUSE	33.1522	33.304	31.2003	27.779	21.3362	25.5115	25.942	35.0719	32.0537	26.8976	25.643	26.1535	28.6704	35.6546
Aldh1a7	Aldehyde dehydrogenase, cytosolic 1 OS=Mus musculus GN=Aldh1a7 PE=2 SV=1	7.58	55044.1	528.74	O35945	4	13.17	0.0086	AL1A7_MOUSE	21.2037	20.8795	21.3487	21.3102	19.3677	42.8809	18.9959	21.1694	32.9264	30.7318	35.6206	31.983	26.5348	32.9987
Rhob	Rho-related GTP-binding protein RhoB OS=Mus musculus GN=Rhob PE=1 SV=1	4.91	22579.6	1753.12	P62746	3	19.39	0	RHOB_MOUSE	23.3575	22.7044	24.9755	23.8141	24.0292	23.3057	16.3707	21.218	24.7884	22.8015	25.0833	21.9178	22.8638	28.4335
Fabp4	Fatty acid-binding protein, adipocyte OS=Mus musculus GN=Fabp4 PE=1 SV=3	8.8	14764	3698.73	P04117	3	21.21	0	FABP4_MOUSE	17.5924	18.8959	17.7077	15.9784	15.3244	17.8586	19.5646	19.7639	18.0463	18.2003	19.0271	16.5982	17.8798	22.2354
SPIKE	Enolase 1 OS=Saccharomyces cerevisiae (strain ATCC 204508 / S288c) GN=ENO1 PE=1 SV=3	6.15	46873.2	11422.2	P00924	12	35.47	0	ENO1_YEAST	3002.92	3547.54	2643.79	2787.47	2321.44	2243.23	2846.53	3718.24	2716.26	2564.21	2561.6	2145.15	2758.2
TRYPSIN	Trypsin OS=Sus scrofa PE=1 SV=1	6.91	25093.8	2174.09	P00761	5	31.17	0	TRYP_PIG	5719.96	5823.05	3810.99	4420.44	3874.57	4672.07	5405.59	5792.14	3852.79	4146.63	4641.53	4213.92	4697.81
