# Supplementary material for: Proteome profile of peripheral myelin in healthy mice and in a neuropathy model
Source: eLife. 2020 Mar 4;9:e51406. doi: 10.7554/eLife.51406 (PMC7056269; doi:10.7554/eLife.51406)
Supplement: Figure 5—source data 2. — For each genotype, tryptic peptides derived from four technical replicates (replicate digestion and replicate injection) per three biological replicate (20 sciatic nerves pooled from 10 animals) were analyzed by LC-MS (24 runs in total). Proteins (FDR < 1%; 2 peptides/protein) and peptides (FDR < 1%;≥7 amino acids) were identified by database search against the UniprotKB/SwissProt mouse database using PLGS. Data were post-processed with the software package ISOQuant to calculate absolute in-sample amounts for each detected protein based on the TOP3 approach. Reported abundance values are defined as the relative amount of each protein in respect to the sum over all detected proteins (ppm: parts per million (w/w) of total protein). Typical contaminant proteins like keratins were filtered. The -log10-transformed q-value was plotted against the log2-transformed fold change to obtain the volcano plot shown in Figure 5D. As no imputation of missing values was performed, proteins exclusive for only one of the conditions do not appear in the volcano plot, but are appended at the end of the list. Criteria for statistically significant regulation were as follows: fold change of at least 1.5 and q-value below 0.05. → sheet 1: protein identification details → sheet 2: comparison of WT vs. Prx-/- myelin proteome by DRE-UDMSE. [file elife-51406-fig5-data2.xlsx]

## Sheet: Table legend
Figure 5-Source data 2. Label-free quantification of proteins in PNS myelin fractions from WT and Prx-/- mice by DRE-UDMSe
Identification and quantification data of detected myelin-associated proteins by DRE-UDMSe. For each genotype, tryptic peptides derived from four technical replicates (replicate digestion and replicate injection) per three biological replicate (20 sciatic nerves pooled from 10 animals) were analyzed by LC-MS (24 runs in total). Proteins (FDR < 1%; 2 peptides/protein) and peptides (FDR < 1%; ≥7 am…
Tab 1	Protein ID details	Number of peptides and proteins identified
Tab 2	WT-KO differential DRE-UDMSe	Differential LC-MS analysis of WT vs. Prx-KO PNS myelin by DRE-UDMSe
Column descriptions
A	gene name	Gene name as extracted from description (column B)
B	description	Protein description as parsed from source database (UniprotKB/SwissProt mouse, release 2016-07)
C	IEP	Calculated isoelectric point
D	mw	Calculated molecular weight (Da)
E	max score	Maximum identification score provided by PLGS database searching
F	accession	Database accession number as parsed from source database
G	reported peptides	Number of peptides after ISOQuant processing
H	sequence coverage	Sequence coverage of the protein
I	FDR level	FDR rate at protein level
J	entry	Protein entry as parsed from source database
K-AH	WT.1 to KO.12	Relative protein abundance in ppm for each replicate
AI,AJ	AVERAGE.WT, AVERAGE.KO	Average relative protein abundance in ppm for WT and KO group
AK	Sparklines	Sparklines displaying the abundance of proteins for each replicate
AL	logFC KO/control	"log2" of fold change as calculated with the R data analysis pipeline (see Materials & Methods for details)
AM	minuslog10q.mod	"-log10" of q-value
AN	q.mod	q-value as calculated with the R data analysis pipeline (see Materials & Methods for details)
AO	zdist	Length of the segment connecting the two points (0,0) and (x,y) with x = log2(fold change) and y= -log10(q-value) (Euclidian distance)

## Sheet: Protein ID details
Acquisition mode	Identified peptides mean (SD); n = 12 PLGS	Identified proteins mean (SD); n = 12 PLGS	Pre-normalization TOP3 values spike mean (SD); n = 12 ISOQuant	Post-normalization TOP3 values spike mean (SD); n = 12 ISOQuant	Quantified proteins ISOQuant	% Sequence coverage ISOQuant
DRE-UDMSE	6438 (1738)	672 (125)	80885 (13218)	86820 (17050)	583	31.2
Number of peptides (column B) and proteins (column C) identified by database search against the UniProtKB/Swiss-Prot mouse proteome using ProteinLynx Global Server (PLGS). TOP3 intensity values (abitrary units) obtained by averaging the intensity of the three most intense peptides from the spike tryptic digest of ENO1_YEAST before (columns D) and after (column E) peak intensity normalization. Mea…

## Sheet: 2 WT-KO differential DRE-UDMSe
gene name	description	IEP	mw	max.score	accession	reported.peptides	sequence.coverage	FDR.level	entry	WT.1	WT.2	WT.3	WT.4	WT.5	WT.6	WT.7	WT.8	WT.9	WT.10	WT.11	WT.12	KO.1	KO.2	KO.3	KO.4	KO.5	KO.6	KO.7	KO.8	KO.9	KO.10	KO.11	KO.12	AVERAGE.WT	AVERAGE.KO	Sparklines	logFC	minuslog10q.mod	q.mod	zdist
Prx	Periaxin OS=Mus musculus GN=Prx PE=2 SV=1	8.36	147916	30117	O55103	58	65.13	0	PRAX_MOUSE	100597	113163	107968	107168	86524.6	88227	98927.9	104436	114910	117292	112631	112602	645.19	713.17	567.36	680.04	496.06	0	0	0	0	0	238.74	0	105371	556.76		-7.64152	18.7829	1.64868e-19	20.2778
Anxa1	Annexin A1 OS=Mus musculus GN=Anxa1 PE=1 SV=2	7.17	39019.5	7037.65	P10107	19	60.69	0	ANXA1_MOUSE	406.77	350.99	362.28	383.11	411.24	414.22	457.87	463.33	403	448.08	395.24	467.61	1104.86	927.21	1016.3	958.74	914.27	869.15	947.05	902.85	821.19	879.2	907.73	945.05	413.65	932.8		1.17511	14.2961	5.05664e-15	14.3444
Lgals3	Galectin-3 OS=Mus musculus GN=Lgals3 PE=1 SV=3	8.6	27629	857.61	P16110	3	15.15	0	LEG3_MOUSE	49.59	38.98	52.31	NA	NA	NA	66.54	NA	34.97	46.38	50.74	50.44	207.47	184.6	200.64	182.86	221.16	181.22	196.19	223.18	176.51	202.88	156.57	178.62	48.74	192.66		1.99967	13.3059	4.94418e-14	13.4553
Epb41l3	Band 4.1-like protein 3 OS=Mus musculus GN=Epb41l3 PE=1 SV=1	5.03	103794	910.6	Q9WV92	27	39.94	0	E41L3_MOUSE	1461.96	1602.5	1501.92	1480.77	1107.68	1200.46	1370.57	1457.25	1371.76	1394.43	1305.73	1589.64	422.22	356.42	405.33	416.69	489.71	424.12	443.15	496.1	575.94	628.2	543.05	624.24	1403.72	485.43		-1.54651	13.3059	4.94418e-14	13.3955
Hsd17b4	Peroxisomal multifunctional enzyme type 2 OS=Mus musculus GN=Hsd17b4 PE=1 SV=3	8.69	79995.2	499.74	P51660	9	17.28	0	DHB4_MOUSE	218.64	228.37	239.53	219	192.45	194.98	227.78	240.2	217.16	234.19	229.42	258.69	382.93	365.76	350.78	403.95	411.74	365.59	386.02	405.83	373.66	389.96	369.12	404.71	225.03	384.17		0.774488	11.5489	2.82542e-12	11.5749
Cryab	Alpha-crystallin B chain OS=Mus musculus GN=Cryab PE=1 SV=2	6.92	20068.8	12952.4	P23927	9	61.14	0	CRYAB_MOUSE	528.25	445.01	516.05	553.2	466.47	509.12	576.42	595.08	573.88	534.71	564.45	687.83	1137.01	848.8	1072.04	1030.34	1037.96	988.49	919.88	1048.43	1241.62	1234.22	1229.38	1321.88	545.87	1092.5		0.998144	10.6215	2.39037e-11	10.6683
Cntf	Ciliary neurotrophic factor OS=Mus musculus GN=Cntf PE=2 SV=1	6.05	22643.8	1654.85	P51642	7	46.97	0	CNTF_MOUSE	79.5	82.22	72.83	76.92	88.48	93.47	95.68	93.61	92.22	85.5	80.85	95.36	212.9	186.15	199.3	209.41	149.82	142.89	142.42	154.12	167.23	183.42	160.82	154.35	86.39	171.9		0.98411	10.6215	2.39037e-11	10.667
Capg	Macrophage-capping protein OS=Mus musculus GN=Capg PE=1 SV=2	6.81	39525.6	2684.53	P24452	9	36.08	0	CAPG_MOUSE	323.11	332.12	311.64	292.28	314.39	243.57	325.96	327.93	247.53	208.08	234.87	233.96	678.51	570.81	668.95	734.03	586.82	482.51	553.14	553.46	626.81	576.21	573.39	626.31	282.95	602.58		1.10041	10.5782	2.64116e-11	10.6353
Coro1c	Coronin-1C OS=Mus musculus GN=Coro1c PE=1 SV=2	6.67	53805.3	315.99	Q9WUM4	5	13.5	0	COR1C_MOUSE	132.27	128.24	113.92	123.52	116.85	115.85	111.83	150.31	128.5	115.59	133.05	132.82	201.34	189.29	204.9	202.08	228.13	188.91	206.1	246.89	210.8	212.25	197	236.29	125.23	210.33		0.748479	10.3689	4.27631e-11	10.3959
Cab39l	Calcium-binding protein 39-like OS=Mus musculus GN=Cab39l PE=2 SV=3	8.49	39333.8	353.78	Q9DB16	3	11.28	0	CB39L_MOUSE	52.25	54.39	NA	NA	52.14	62.48	61.31	62.74	52.29	49.94	53.03	49.74	99.63	107.04	92.93	112.58	102.27	96.93	103.95	122.3	91.09	111.57	103.47	141.3	55.03	107.09		0.955708	10.2236	5.9764e-11	10.2681
Anxa5	Annexin A5 OS=Mus musculus GN=Anxa5 PE=1 SV=1	4.62	35809.5	1177.07	P48036	8	25.71	0	ANXA5_MOUSE	215.45	176.07	200.09	210.93	172.43	170.19	178.95	189.71	164.66	172.74	150.76	186.74	391.27	350.16	355.95	311.65	295.4	279.06	285.83	324.14	315.16	361.47	290.93	341.09	182.39	325.18		0.833732	10.223	5.98409e-11	10.2569
Pllp	Plasmolipin OS=Mus musculus GN=Pllp PE=2 SV=1	9.57	19915.6	6009.49	Q9DCU2	2	21.43	0	PLLP_MOUSE	982.26	992.89	1129.43	1202.94	1046.88	1168.49	1341.63	1290.26	1011.51	1045.03	1096.52	988.85	2174.01	1877.43	2306.95	2325.87	1974.34	1675.26	1790.64	2214.83	1742.43	1937.25	1644.58	1805.46	1108.06	1955.75		0.817188	9.4852	3.2719e-10	9.52034
Paics	Multifunctional protein ADE2 OS=Mus musculus GN=Paics PE=1 SV=4	6.97	47747.5	641.09	Q9DCL9	9	28.94	0	PUR6_MOUSE	131.06	141.76	128.14	125.1	131.33	125.28	147.21	136.65	161.19	142.13	153.97	163.41	240.89	188.72	200.76	219.93	249.37	197.44	243.36	241.94	246.93	234.81	257.93	251.05	140.6	231.09		0.715568	9.16135	6.89687e-10	9.18925
Prnp	Major prion protein OS=Mus musculus GN=Prnp PE=1 SV=2	9.55	28148.6	2510.69	P04925	4	16.54	0	PRIO_MOUSE	157.99	161.57	156.8	162.12	167.72	165.41	189.05	199.54	173.95	173.63	172.37	186.14	256.76	246.78	264.71	295.77	266.37	240.44	259.3	268.53	236.68	232.36	231.22	264	172.19	255.24		0.568195	8.71892	1.91021e-09	8.73741
Ahcy	Adenosylhomocysteinase OS=Mus musculus GN=Ahcy PE=1 SV=3	6.07	48201.5	1379.06	P50247	13	43.29	0	SAHH_MOUSE	363.35	375.47	522.63	741.91	580.09	657.86	737.43	387.38	420.41	282.54	362.55	537.2	162.55	160.42	172.48	155.82	224.93	114.65	137.34	164.38	155.61	195.32	254.46	166.34	497.4	172.02		-1.49628	8.57647	2.65175e-09	8.70601
Cnn3	Calponin-3 OS=Mus musculus GN=Cnn3 PE=1 SV=1	5.34	36599.8	1906.18	Q9DAW9	9	39.39	0	CNN3_MOUSE	228.19	266.91	222.28	250.38	198.3	191.38	208.01	212.67	268.47	261.51	249.29	256.97	363.96	344.02	353.91	373.01	393.93	348.34	388.69	425.2	340.1	380.11	338.25	352.88	234.53	366.87		0.651681	8.50474	3.12795e-09	8.52967
Lyz2	Lysozyme C-2 OS=Mus musculus GN=Lyz2 PE=1 SV=2	8.87	17145.2	460.43	P08905	3	31.76	0	LYZ2_MOUSE	26.93	NA	24.07	25.76	26.4	28.06	35.99	35.17	23.95	23.42	25.41	28.15	81.76	70.53	74.5	72.12	55.32	49.06	50.69	59.41	50.92	42.14	44.78	53.42	27.57	58.72		1.07399	8.28862	5.14499e-09	8.35791
Mdh1	Malate dehydrogenase, cytoplasmic OS=Mus musculus GN=Mdh1 PE=1 SV=3	6.15	36682.3	466.79	P14152	3	15.57	0	MDHC_MOUSE	87.25	76.77	83.19	75.76	66.41	55.33	90.6	63.25	70.44	61.16	71.09	82.41	178.9	147.74	122.15	173.02	133.58	102.9	126.65	128.12	131.51	132.02	124.43	116.69	73.64	134.81		0.870929	8.18899	6.47157e-09	8.23517
Gjb1	Gap junction beta-1 protein OS=Mus musculus GN=Gjb1 PE=1 SV=3	9.07	32573.8	199.4	P28230	2	10.25	0	CXB1_MOUSE	106.79	104.58	99.87	92.89	114.62	94.74	124.66	110.14	152.38	132.78	154.55	142.25	295.33	256.81	235.92	282.43	218.4	158.57	221.33	275.93	221.5	170.68	238.85	239.14	119.19	234.57		0.976152	7.91155	1.22587e-08	7.97155
Hrsp12	Ribonuclease UK114 OS=Mus musculus GN=Hrsp12 PE=1 SV=3	9.13	14312.5	1031.85	P52760	5	61.48	0	UK114_MOUSE	33.55	36.2	33.85	35.38	42	39.81	47.05	50.16	34.83	33.87	34.99	38.16	104.32	92.54	99	107.56	77.24	72.91	69.71	83.92	60.83	68.88	50.77	58.63	38.32	78.86		1.01582	7.84242	1.4374e-08	7.90794
Crip2	Cysteine-rich protein 2 OS=Mus musculus GN=Crip2 PE=1 SV=1	8.62	23525.4	1985.87	Q9DCT8	7	68.75	0	CRIP2_MOUSE	164.21	184.97	180.85	176.22	239.31	268.83	289.52	286.11	206.06	198.43	215.65	207.75	264	389.07	383.94	419.23	438.89	425.03	518.44	542.33	402.17	423.62	459.87	492.88	218.16	429.96		0.98258	7.84108	1.44185e-08	7.9024
Lamp1	Lysosome-associated membrane glycoprotein 1 OS=Mus musculus GN=Lamp1 PE=1 SV=2	8.43	44321.4	220.72	P11438	2	5.67	0	LAMP1_MOUSE	142.31	160.28	159.27	147.53	118.13	121.76	123.98	134.98	155.66	160.95	145.22	165.53	212.48	194.08	209.07	223.54	225.34	201.98	197.09	241.47	244.47	255.48	247.49	238.72	144.63	224.27		0.635945	7.87043	1.34764e-08	7.89608
Csrp1	Cysteine and glycine-rich protein 1 OS=Mus musculus GN=Csrp1 PE=1 SV=3	8.55	21438.8	6548.75	P97315	8	60.62	0	CSRP1_MOUSE	550.72	449.88	432.16	436.07	464.63	510	532.8	481.74	450.51	364.64	496.01	496.76	1016.24	776.41	812.28	793.45	727.65	581.41	704.59	768.47	704.77	817.1	684.36	800.34	472.16	765.59		0.693362	7.84242	1.4374e-08	7.87301
Myh10	Myosin-10 OS=Mus musculus GN=Myh10 PE=1 SV=2	5.27	229966	242.46	Q61879	14	8.5	0	MYH10_MOUSE	720.5	760.73	652.48	787.37	696.55	787.37	793.72	963.93	771.16	939.84	758.04	1087.07	1261.2	1590.28	1161.12	1642.31	1162.8	1368.33	1219.57	1692.56	1194.73	1645.88	1308.1	1526.37	809.9	1397.77		0.787408	7.77331	1.68535e-08	7.81309
Stxbp6	Syntaxin-binding protein 6 OS=Mus musculus GN=Stxbp6 PE=2 SV=1	9.57	23956.2	3424.34	Q8R3T5	10	59.52	0	STXB6_MOUSE	265.31	291.72	289.68	242.88	296.19	261.5	369.51	341.7	300.72	255.6	291.52	310.64	672.46	533.23	610	595.03	519.76	434.36	442.67	484.75	428.99	423.1	401.23	459.64	293.08	500.44		0.762773	7.60148	2.50332e-08	7.63966
Ppic	Peptidyl-prolyl cis-trans isomerase C OS=Mus musculus GN=Ppic PE=1 SV=1	7.36	22908.3	641.49	P30412	5	37.74	0	PPIC_MOUSE	90.25	84.98	96.96	97.06	96.05	100.94	112.06	118.07	124.51	124.18	118.29	122.93	195.84	177.43	192.4	205.25	182.91	162.51	186.05	205.8	146.56	154	142.46	152.49	107.19	175.31		0.710248	7.53442	2.9213e-08	7.56783
Cyb5r3	NADH-cytochrome b5 reductase 3 OS=Mus musculus GN=Cyb5r3 PE=1 SV=3	8.52	34355.8	2992.83	Q9DCN2	13	58.8	0	NB5R3_MOUSE	368.31	338.52	319.44	377.82	255.27	318.21	304.83	363.18	354.86	397	345.35	450.79	525.85	422.4	534.21	596.44	476.88	519	593.68	708.19	586.92	678.4	579.26	593.36	349.46	567.88		0.700637	7.02145	9.5181e-08	7.05632
Gng12	Guanine nucleotide-binding protein G(I)/G(S)/G(O) subunit gamma-12 OS=Mus musculus GN=Gng12 PE=1 SV=3	9.48	8111.3	2534.45	Q9DAS9	4	66.67	0	GBG12_MOUSE	19.39	23.35	20.27	19.28	18.62	15.26	20.26	20.67	20.5	20.47	20.36	21.82	39.84	29.95	29.14	32.42	29.22	29.62	32.1	28.6	27.74	25.69	24.76	29.77	20.02	29.9		0.575444	6.93241	1.16839e-07	6.95625
Pdcd6ip	Programmed cell death 6-interacting protein OS=Mus musculus GN=Pdcd6ip PE=1 SV=3	6.1	96594.6	394.81	Q9WU78	19	31.53	0	PDC6I_MOUSE	261.51	256.93	269.87	256.8	465.45	321.1	437.46	336.63	335.58	332.63	354.5	322.64	754.29	775.24	743.82	752	783.35	495.68	564.33	610.12	461.63	454.63	587.35	524.33	329.26	625.57		0.923073	6.87746	1.32599e-07	6.93913
Tubb1	Tubulin beta-1 chain OS=Mus musculus GN=Tubb1 PE=1 SV=1	4.78	51125.4	1491.47	A2AQ07	6	11.09	0	TBB1_MOUSE	538.87	476.44	428.95	475.05	408.19	402.22	475.01	470.61	448.22	470.7	461.36	473.75	797.71	687.69	572.44	492.47	823.13	736.34	788.75	891.76	946.48	945.88	1001.11	1056.66	460.78	811.7		0.788486	6.8313	1.4747e-07	6.87665
Lamc1	Laminin subunit gamma-1 OS=Mus musculus GN=Lamc1 PE=1 SV=2	4.9	182944	359.24	P02468	18	15.74	0	LAMC1_MOUSE	888.51	904.45	822.2	807.47	697.51	618.82	716.04	794.24	837.17	869.34	821.98	919.12	NA	NA	NA	NA	382.91	445.94	399.25	489.87	369.68	538.77	505.73	603.01	808.07	466.9		-0.801868	6.68668	2.05741e-07	6.73459
Atp1a3	Sodium/potassium-transporting ATPase subunit alpha-3 OS=Mus musculus GN=Atp1a3 PE=1 SV=1	5.09	113117	3406.08	Q6PIC6	39	49.85	0	AT1A3_MOUSE	1363.65	1394.98	1408.27	1345.41	927.81	1067.91	1128.37	1036.21	1459.74	1431.85	1282.74	1443.14	762.16	775.18	778.75	819.29	806.93	746.39	803.08	830.4	909.02	897.46	906.4	991.29	1274.17	835.53		-0.598801	6.67211	2.12758e-07	6.69893
Got2	Aspartate aminotransferase, mitochondrial OS=Mus musculus GN=Got2 PE=1 SV=1	9.26	47810.7	6232.59	P05202	17	55.35	0	AATM_MOUSE	688.77	737.87	665.28	701.49	548.48	543.41	639.88	622	621.56	563.03	640.63	586.28	965.53	801.64	868.56	1024.66	1012.35	755.37	915.89	1135.56	909.29	848.88	826.3	908.6	629.89	914.39		0.535313	6.67211	2.12758e-07	6.69355
Gatm	Glycine amidinotransferase, mitochondrial OS=Mus musculus GN=Gatm PE=1 SV=1	7.8	48810.6	711.66	Q9D964	10	37.83	0	GATM_MOUSE	111.54	114.15	118.2	111.26	119.28	137.81	136.68	159.18	150.67	153.27	134.38	148.1	164.5	164.74	178.78	205.44	252.53	227.42	239.41	318.33	219.14	239.95	219.21	246.9	132.88	223.03		0.73461	6.58514	2.59929e-07	6.62599
	Ig heavy chain V region AC38 205.12 OS=Mus musculus PE=1 SV=1	7	13048.4	961.76	P06330	5	55.08	0	HVM51_MOUSE	72.63	44.47	43.62	42.67	48.89	50.54	54.6	49.17	40.14	35.61	31.93	36.99	114.21	94.85	116.08	128.56	74.87	69.31	70.03	84.28	72.28	77.39	75.08	70.76	45.94	87.31		0.924482	6.39226	4.05264e-07	6.45877
Drp2	Dystrophin-related protein 2 OS=Mus musculus GN=Drp2 PE=2 SV=1	5.8	109305	361.65	Q05AA6	12	17.66	0	DRP2_MOUSE	560.99	413.63	442	496.08	335.92	467.51	419.31	456.43	448.31	442.21	409.31	498.85	NA	NA	NA	NA	NA	NA	NA	NA	191.48	236.82	164.41	NA	449.21	197.57		-1.19086	6.34015	4.56927e-07	6.45102
Lypla2	Acyl-protein thioesterase 2 OS=Mus musculus GN=Lypla2 PE=1 SV=1	6.83	25136.2	290.5	Q9WTL7	2	19.05	0	LYPA2_MOUSE	48.16	40.13	58.59	62.52	55.71	57.38	63.45	52.17	58.85	47.7	59.8	57.15	87.84	77.2	97.74	114.13	106.67	92.78	84.53	94.43	91.54	78.39	69.02	64.31	55.13	88.22		0.670752	6.39226	4.05264e-07	6.42736
Sbds	Ribosome maturation protein SBDS OS=Mus musculus GN=Sbds PE=1 SV=4	9.08	29065.7	318.49	P70122	3	23.2	0	SBDS_MOUSE	61.23	59.88	67.08	63.6	68.61	81.46	76.2	75.82	60	60.83	58	59.64	107.36	99.98	126.23	113.72	88.61	86.59	77.95	97.52	84.57	98.21	93.01	108.46	66.03	98.52		0.573638	6.33141	4.66222e-07	6.35734
Myh9	Myosin-9 OS=Mus musculus GN=Myh9 PE=1 SV=4	5.38	227570	1040.57	Q8VDD5	58	36.68	0	MYH9_MOUSE	1941.33	1797.91	1811.04	2413.07	1765.32	2355.45	2716.89	2475.95	2090.07	2617.89	2520.5	3004.9	4455.88	4369.21	4510.01	3733.22	3517.56	3481.22	3928.45	3995.23	3347.93	2473.33	3600.03	4306.48	2292.52	3809.88		0.736448	6.29136	5.11263e-07	6.33431
Vwa5a	von Willebrand factor A domain-containing protein 5A OS=Mus musculus GN=Vwa5a PE=1 SV=2	6.13	87884.3	692.73	Q99KC8	21	39.09	0	VMA5A_MOUSE	441.12	452.53	490.53	586.58	544.69	452.27	537.28	518.55	453.98	418.96	466.43	495.8	877.94	812.53	847.92	924.67	815.87	678.65	584.41	681.87	655.72	583.82	672.53	688.88	488.23	735.4		0.581655	6.2517	5.60149e-07	6.2787
Bsg	Basigin OS=Mus musculus GN=Bsg PE=1 SV=2	5.46	42901	752.01	P18572	6	18.51	0	BASI_MOUSE	271.51	272.92	240.91	256.78	186.18	196.69	193.96	214.29	241.45	251.77	264.45	279.18	180.5	181.49	166.66	138.04	169.8	146.02	140.21	150.81	173.02	170.7	156.2	178.61	239.17	162.67		-0.548972	6.13708	7.29318e-07	6.16159
Lap3	Cytosol aminopeptidase OS=Mus musculus GN=Lap3 PE=1 SV=3	7.63	56540.6	321.34	Q9CPY7	5	12.33	0	AMPL_MOUSE	93.67	74.81	81.83	80.71	92.89	101.65	115.6	101.76	103.33	98.69	99.13	118.88	NA	NA	NA	NA	145.1	156.2	136.97	146.2	143.97	151.97	138.31	157.7	96.91	147.05		0.612516	6.07469	8.42001e-07	6.10549
Fgg	Fibrinogen gamma chain OS=Mus musculus GN=Fgg PE=1 SV=1	5.44	50075.8	2202.45	Q8VCM7	17	54.82	0	FIBG_MOUSE	458.86	497.78	427.17	408.84	452.66	469.05	505.59	557.3	550.92	567.39	563.35	663.08	599.77	653.18	631.19	701.31	832.85	807.9	846.49	853.93	732.87	831.48	775.16	872.2	510.17	761.53		0.580196	6.07469	8.42001e-07	6.10233
Basp1	Brain acid soluble protein 1 OS=Mus musculus GN=Basp1 PE=1 SV=3	4.29	22086.6	353.31	Q91XV3	2	15.93	0	BASP1_MOUSE	89	89.46	84.94	86.94	66.97	66.94	49.36	62.14	82.03	79.45	65.66	71.14	177.26	160.82	148.61	175.98	116.77	98.41	108.6	124.89	100.6	111.74	105.04	124.98	74.5	129.48		0.787033	6.00837	9.80902e-07	6.0597
Ctsd	Cathepsin D OS=Mus musculus GN=Ctsd PE=1 SV=1	6.77	45410.1	677.21	P18242	7	29.27	0	CATD_MOUSE	80.73	73.31	135.84	103.33	98.99	69.47	NA	73.23	65.01	64.82	137.19	114.45	160.44	162.38	134.86	157.81	247.03	148.09	160.17	168.52	231.41	184.07	152.28	171.38	92.4	173.2		0.939246	5.97192	1.06678e-06	6.04533
Ica	Inhibitor of carbonic anhydrase OS=Mus musculus GN=Ica PE=1 SV=1	6.91	78761.8	713.06	Q9DBD0	11	27.29	0	ICA_MOUSE	242.89	186.55	252.35	299.61	346.75	418.52	471.06	504.46	282.27	272.25	261.46	326.79	636.29	525.74	506.58	494.55	640.97	687.31	641.73	771.41	635.46	722.58	494.96	439.77	322.08	599.78		0.933455	5.97192	1.06678e-06	6.04444
Rhoa	Transforming protein RhoA OS=Mus musculus GN=Rhoa PE=1 SV=1	5.73	22124.4	5939.17	Q9QUI0	8	64.77	0	RHOA_MOUSE	218.69	229.88	247.52	283.08	240.05	255.31	299.45	249.55	318.97	289.61	355.55	409.9	430.06	365.88	431.34	414.42	434.89	369.66	440.13	407.75	430.51	431.21	465.21	425.87	283.13	420.58		0.591868	6.00837	9.80902e-07	6.03746
Cat	Catalase OS=Mus musculus GN=Cat PE=1 SV=4	7.79	60080.6	3173.78	P24270	25	60.53	0	CATA_MOUSE	827.61	791.2	688.44	691.25	667.37	761.69	693.73	788.35	579.14	595.07	537.59	619.91	960.58	1004.91	967.96	1068.15	906.41	864.03	894.19	1083.99	912.56	970.22	872.45	1028.06	686.78	961.13		0.493182	6.00837	9.80902e-07	6.02858
Rdx	Radixin OS=Mus musculus GN=Rdx PE=1 SV=3	5.83	68657	2157.4	P26043	18	35.68	0	RADI_MOUSE	3865.6	4262.25	3250.79	3451.19	3205.07	3743.69	4601.81	4366.31	6136.27	5850.12	5694.17	6331.36	7946.71	7379.09	8595.15	8745.13	8024.32	7807.68	8218.34	9760.42	5982.18	5841.81	7588.52	7612.76	4563.22	7791.84		0.799895	5.94017	1.14771e-06	5.99378
Fga	Fibrinogen alpha chain OS=Mus musculus GN=Fga PE=2 SV=1	5.69	88170.7	1301.02	E9PV24	12	18.12	0	FIBA_MOUSE	643.66	675.88	616.55	593.45	641.68	611.47	710.75	684.35	737.37	750.94	662.92	788.71	885.12	735.48	791.88	845.22	1178.43	925	1125.34	1064.86	1055	964.63	1021	984.66	676.48	964.72		0.504078	5.84292	1.43575e-06	5.86462
Sept2	Septin-2 OS=Mus musculus GN=Sept2 PE=1 SV=2	6.09	41753.7	1541.2	P42208	10	43.21	0	SEPT2_MOUSE	346.89	322.83	270.14	256.52	293.29	312.59	291.46	344.03	356.13	365.74	340.61	339.63	454.84	434.66	399.18	432.49	402.27	382.36	419.72	464.51	404.08	456.09	413.87	465.41	319.99	427.46		0.423255	5.78074	1.65678e-06	5.79621
Atp6v1a	V-type proton ATPase catalytic subunit A OS=Mus musculus GN=Atp6v1a PE=1 SV=2	5.26	68668.4	344.32	P50516	11	24.31	0	VATA_MOUSE	200.18	218.22	188.83	203.44	184.39	213.53	209.75	206.01	215.88	204.62	212.82	243.23	223.77	223.5	250.97	290.6	309.51	283.66	322.47	346.88	316.36	345.92	311.74	313.11	208.41	294.87		0.489427	5.65234	2.22668e-06	5.67349
Hspa1a	Heat shock 70 kDa protein 1A OS=Mus musculus GN=Hspa1a PE=1 SV=2	5.38	70364.4	1579.5	Q61696	7	16.69	0	HS71A_MOUSE	172.73	185.12	179.66	210.68	153.2	148.39	176.72	184.66	194.11	173.32	193.4	198.55	268.93	236.36	240.5	206.25	236.68	215.17	220.07	271.58	271.46	279.75	250.66	307.39	180.88	250.4		0.466436	5.65234	2.22668e-06	5.67155
Rpl28	60S ribosomal protein L28 OS=Mus musculus GN=Rpl28 PE=1 SV=2	12.42	15790.5	421.27	P41105	2	16.06	0	RL28_MOUSE	27.57	24.83	27.43	22.93	NA	NA	24.44	22.85	29.85	27.59	28.11	27.7	NA	NA	NA	NA	36.56	44.4	34.56	38.12	38.47	43.97	34.27	37.97	26.33	38.54		0.549071	5.62678	2.36166e-06	5.65351
Ehd4	EH domain-containing protein 4 OS=Mus musculus GN=Ehd4 PE=1 SV=1	6.32	61708.8	425.57	Q9EQP2	10	21.44	0	EHD4_MOUSE	141.45	108.48	90.34	98.66	86.59	115.92	103.81	112.4	136.8	133.21	132.47	141.53	173.87	138.95	179.07	217.97	160.08	145.84	172.22	200.85	155.51	211.73	182.16	212.63	116.81	179.24		0.622611	5.60112	2.50542e-06	5.63562
Aldh1a1	Retinal dehydrogenase 1 OS=Mus musculus GN=Aldh1a1 PE=1 SV=5	7.7	55095.2	745.98	P24549	12	32.73	0	AL1A1_MOUSE	169.81	160.29	173.09	190.49	230.06	228.94	254.99	298.41	147.67	142.57	159.35	174.1	272.97	243.16	242.07	315.51	316.32	324.68	327.6	386.59	304.16	335.89	321.72	367.09	194.15	313.15		0.713745	5.53841	2.89461e-06	5.58421
Cd59a	CD59A glycoprotein OS=Mus musculus GN=Cd59a PE=2 SV=1	7.34	14332.4	2256.73	O55186	2	21.14	0	CD59A_MOUSE	128.74	127.04	126.83	113.61	145.64	123.03	143.34	132.5	128.7	105.57	130.32	123.3	297.49	207.98	222.16	230.43	217.63	154.56	164.13	174.52	201.45	152.81	162.97	164.23	127.39	195.86		0.597163	5.54829	2.82948e-06	5.58034
Slc16a1	Monocarboxylate transporter 1 OS=Mus musculus GN=Slc16a1 PE=1 SV=1	7.37	53894.6	567.2	P53986	4	12.78	0	MOT1_MOUSE	328.7	332.98	306.68	324.61	222.04	218.14	248.67	249.46	301.55	318.45	314.29	340.63	150.27	130.8	110.18	152.5	190.17	179.47	178.18	207.61	210.75	225.51	205.47	222.67	292.18	180.3		-0.711345	5.42816	3.73111e-06	5.47457
Cmtm5	CKLF-like MARVEL transmembrane domain-containing protein 5 OS=Mus musculus GN=Cmtm5 PE=1 SV=1	4.55	17617.5	2603.09	Q9D6G9	2	12.82	0	CKLF5_MOUSE	96.6	99.81	90.97	92.25	114.54	100.57	104.32	113.95	110.68	115.85	113.77	118.14	207.88	179.94	179.02	197.82	146.77	143.04	140.31	157.77	121.81	132.61	123.22	142.66	105.95	156.07		0.543038	5.44601	3.58087e-06	5.47302
Nid1	Nidogen-1 OS=Mus musculus GN=Nid1 PE=1 SV=2	5.08	139389	613.08	P10493	13	15.98	0	NID1_MOUSE	892.84	807.18	924.98	886.04	849.83	824.27	975.21	935.98	1084.1	971.27	1021.87	1082.57	373.94	440	359.25	395.2	573.08	583.22	604.16	632.65	717.15	712.79	747.99	757.56	938.01	574.75		-0.749272	5.41871	3.81317e-06	5.47027
Hmgcs1	Hydroxymethylglutaryl-CoA synthase, cytoplasmic OS=Mus musculus GN=Hmgcs1 PE=1 SV=1	5.56	58196.4	484.85	Q8JZK9	5	14.42	0	HMCS1_MOUSE	143.33	141.86	161.33	180.58	175.02	197.42	175.05	170.27	94.32	112.68	86.73	115.61	230.43	235.85	193.28	244.31	243.4	266.11	210.19	285.41	241.53	385.75	219.41	261	146.18	251.39		0.806388	5.39099	4.06449e-06	5.45097
Igh-3	Ig gamma-2B chain C region OS=Mus musculus GN=Igh-3 PE=1 SV=3	6.07	45000.8	2974.29	P01867	8	30.94	0	IGG2B_MOUSE	336.31	332.77	344.59	338.51	686.53	766.33	823.76	843.01	723.42	619.84	640.65	746.18	1234.83	1153.32	1193.59	1392.84	1008.45	865.55	958.75	1106.24	1079.98	1200.58	1123.53	1243.06	600.16	1130.06		0.99356	5.3352	4.62164e-06	5.42693
Fn1	Fibronectin OS=Mus musculus GN=Fn1 PE=1 SV=4	5.25	276188	105.77	P11276	2	1.17	0	FINC_MOUSE	2188.3	1760.61	1847.65	1796.49	2064.23	2223.96	2276.32	2559.6	1369.89	1526.37	1923.88	1743.76	4919.32	5062.02	3306.71	4524	2778.69	3697.72	2546.3	3178.15	2325.97	3321.68	2681.6	2577.02	1940.09	3409.93		0.785737	5.29161	5.10958e-06	5.34963
Rps24	40S ribosomal protein S24 OS=Mus musculus GN=Rps24 PE=2 SV=1	11.23	15423.2	492.74	P62849	2	20.3	0	RS24_MOUSE	34.36	44.02	34.44	37.09	28.65	27.99	32.86	32.23	39.12	38.2	32.19	40.6	NA	NA	NA	NA	45.76	50.82	42.88	54.86	51.34	60.94	56.37	59.58	35.15	52.82		0.590616	5.30467	4.95822e-06	5.33745
Anxa6	Annexin A6 OS=Mus musculus GN=Anxa6 PE=1 SV=3	5.18	76341.7	4946.33	P14824	43	72.07	0	ANXA6_MOUSE	1994.79	1778.66	1584.59	1734.55	1263.42	1566.27	1554.63	1702.03	2040.11	1818.55	2074.62	2073.44	1149.23	1084.55	966.7	1101.22	1274.18	1105.66	1187	1333.13	1399.36	1350.64	1431.4	1411.18	1765.47	1232.85		-0.514429	5.27228	5.34223e-06	5.29731
Acadl	Long-chain specific acyl-CoA dehydrogenase, mitochondrial OS=Mus musculus GN=Acadl PE=1 SV=2	8.35	48307.2	901.28	P51174	9	27.91	0	ACADL_MOUSE	169.04	171	169.76	157.13	186.63	201.34	216.93	233.27	234.68	243.39	249.15	263.55	119.15	107.69	114.02	121.35	159.4	151.14	146.62	155.15	149.46	155.74	133.97	153	207.99	138.89		-0.574014	5.19407	6.3963e-06	5.22569
Plp1	Myelin proteolipid protein OS=Mus musculus GN=Plp1 PE=1 SV=2	8.29	30875.6	10661.7	P60202	8	28.16	0	MYPR_MOUSE	3095.74	2984.04	2514.43	2744.71	2502.36	2353.7	2854.29	2746.73	3513.82	3357.19	3174.13	3386.27	4604.86	4067.62	4571.79	4823.93	3598.98	3355.1	3874.53	4141.99	3612.33	3723.48	3695.8	4186.34	2935.62	4021.4		0.456658	5.12599	7.48185e-06	5.14629
Arpc3	Actin-related protein 2/3 complex subunit 3 OS=Mus musculus GN=Arpc3 PE=1 SV=3	8.8	20752.8	986.17	Q9JM76	5	27.53	0	ARPC3_MOUSE	65.18	77.01	57.05	61.74	61.19	68.5	69.54	75.66	82.47	91.7	68.58	81.72	103.07	82.5	103.02	90.56	99.14	91.76	97.08	107.53	89.34	87.02	107.47	108.08	71.7	97.21		0.446953	5.12191	7.55246e-06	5.14138
Tpi1	Triosephosphate isomerase OS=Mus musculus GN=Tpi1 PE=1 SV=4	5.43	32705	794.53	P17751	6	32.44	0	TPIS_MOUSE	111.14	122.2	106.95	103.19	146.07	171.89	109.35	127.96	116.66	111.5	109.72	128.43	193.18	155.08	178.57	201.95	174.67	147.04	160.13	193.65	153.48	154.99	144.52	180.5	122.09	169.81		0.482472	5.07979	8.3217e-06	5.10265
Cnrip1	CB1 cannabinoid receptor-interacting protein 1 OS=Mus musculus GN=Cnrip1 PE=1 SV=1	8.19	18726.5	584.24	Q5M8N0	4	41.46	0	CNRP1_MOUSE	89.24	107.95	122.91	119.88	113.67	100.05	146.88	116.31	115.62	117.14	120.93	120.64	185.65	145.61	166.09	189.08	162.74	132.46	175.12	162.88	153.52	139.91	131.4	148.17	115.93	157.72		0.443673	4.9961	1.00902e-05	5.01576
Sptbn1	Spectrin beta chain, non-erythrocytic 1 OS=Mus musculus GN=Sptbn1 PE=1 SV=2	5.26	275079	2435.76	Q62261	101	55.48	0	SPTB2_MOUSE	4658.64	4590.19	4392.56	4222.11	4028.79	3728.39	3333.53	3259.42	4834.37	4475.57	4566.82	5090.33	2602.27	2359.42	2352.81	2599.55	2758.7	2434.69	2653.81	2896.65	3618.14	3670.74	3509.84	3662.39	4265.06	2926.58		-0.551656	4.97113	1.06874e-05	5.00164
Tagln2	Transgelin-2 OS=Mus musculus GN=Tagln2 PE=1 SV=4	8.44	22566.6	2055.19	Q9WVA4	14	81.41	0	TAGL2_MOUSE	170.57	156.52	163.69	142.51	133.01	133.63	147.34	152.35	130.52	141.97	133.09	136.27	290.08	246.24	290.82	284.79	207.32	187.67	203.34	188.6	184.46	177.65	172.52	164.83	145.12	216.53		0.551844	4.91807	1.20763e-05	4.94893
Cadm4	Cell adhesion molecule 4 OS=Mus musculus GN=Cadm4 PE=1 SV=1	5.88	43179.6	3343.39	Q8R464	10	42.27	0	CADM4_MOUSE	607.28	693.2	641.67	588.5	556.36	562.92	596.74	630.64	732.87	709.99	667.56	826.85	474.69	426.95	428.89	447.52	538.71	467.25	471.06	579.52	522.39	509.07	492.64	542.79	651.21	491.79		-0.401937	4.91807	1.20763e-05	4.93446
Fgb	Fibrinogen beta chain OS=Mus musculus GN=Fgb PE=2 SV=1	6.71	55437.2	1832.63	Q8K0E8	23	66.11	0	FIBB_MOUSE	382.98	341.25	431.34	408.79	427.12	431.67	450.68	387.95	401.03	383.56	465.42	570.13	544.84	400.21	603.32	476.97	660.73	666.85	695.23	672.85	630.05	583.96	727.37	738.63	423.49	616.75		0.533139	4.89078	1.28595e-05	4.91975
Tmed10	Transmembrane emp24 domain-containing protein 10 OS=Mus musculus GN=Tmed10 PE=2 SV=1	6.25	25081.9	1068.56	Q9D1D4	3	17.81	0	TMEDA_MOUSE	108.36	103.21	88.97	98.13	75.99	75.23	94.21	111.86	103.38	98.86	99.08	115.32	195.44	164.16	192.98	233.83	130.58	126.48	133.55	152.59	119.21	129.35	115.63	130.39	97.72	152.02		0.613796	4.86664	1.35943e-05	4.9052
Prdx2	Peroxiredoxin-2 OS=Mus musculus GN=Prdx2 PE=1 SV=3	5.04	21949.8	7386.35	Q61171	12	72.73	0	PRDX2_MOUSE	297.54	322.78	300.47	323.26	314.99	348.02	353.47	387.16	375.32	366.41	351.14	400.35	437.9	415.46	373.51	411.44	450.63	439.08	453.19	558.98	468.47	457.62	424.18	462.46	345.08	446.08		0.37043	4.86664	1.35943e-05	4.88072
Gstm2	Glutathione S-transferase Mu 2 OS=Mus musculus GN=Gstm2 PE=1 SV=2	7.44	25887.8	4814.87	P15626	10	53.21	0	GSTM2_MOUSE	188.59	185.05	188.57	181.26	183.31	174.02	237.43	251.7	145.47	130.14	134.54	158.24	292.63	266.61	247.65	257.19	292.6	248.21	239.2	290.2	229.64	239.81	216.26	251.87	179.86	255.99		0.529784	4.8418	1.43946e-05	4.8707
Nefm	Neurofilament medium polypeptide OS=Mus musculus GN=Nefm PE=1 SV=4	4.56	96030.3	10100	P08553	40	55.9	0	NFM_MOUSE	10707.5	9987.92	9741.34	9089.31	4567.43	5213.21	6688.24	7118.66	8062.07	7039.97	7652.48	8072.24	4636.55	3951.05	3591.76	3359.85	4479	4180.84	4026.69	4241.86	5891.98	6209.66	5181.75	6123.25	7828.36	4656.19		-0.736732	4.8033	1.5729e-05	4.85947
Ldhb	L-lactate dehydrogenase B chain OS=Mus musculus GN=Ldhb PE=1 SV=2	5.63	36857.5	1707.76	P16125	9	32.93	0	LDHB_MOUSE	194.52	171.93	174.59	179.2	133.84	140.04	176.6	193.04	181.4	186.85	165.68	181.66	244.89	235.4	223.12	248.36	235.61	195.63	206.18	223.46	218.96	220.87	210.65	209.53	173.28	222.72		0.367342	4.81789	1.52094e-05	4.83187
	Ig gamma-2A chain C region secreted form OS=Mus musculus PE=1 SV=1	8.2	37109.2	2189.47	P01864	5	17.31	0	GCAB_MOUSE	330.61	389.05	314.26	341.03	581.12	680	726.79	685.64	639.21	632.43	623.31	623.07	906	684.81	847.45	702.77	1049.77	819.13	915.95	831.42	1476.41	1201.63	1383.37	1603.38	547.21	1035.17		0.927133	4.66939	2.14099e-05	4.76054
Ptrf	Polymerase I and transcript release factor OS=Mus musculus GN=Ptrf PE=1 SV=1	5.26	43953.7	2305.55	O54724	9	30.36	0	PTRF_MOUSE	770.38	818.1	759.47	791.95	491.27	475.86	552.07	520.03	711.49	716.12	715.59	779.21	282.77	269.26	286.29	327.44	371.03	343.89	347.97	359.12	566.31	538.71	573.97	573.36	675.13	403.34		-0.775431	4.66939	2.14099e-05	4.73333
Col14a1	Collagen alpha-1(XIV) chain OS=Mus musculus GN=Col14a1 PE=2 SV=2	4.8	194211	589.54	Q80X19	40	32.22	0	COEA1_MOUSE	1219.64	959.94	1232.58	1087.16	1136.84	1191.29	1071.21	1334.27	1316.42	1638.15	1623.15	1497.78	532.51	520.82	402.53	NA	851.72	851.13	962.47	945.21	850.46	1034.44	762.82	755.95	1275.7	770.01		-0.763897	4.66939	2.14099e-05	4.73146
Map1lc3a	Microtubule-associated proteins 1A/1B light chain 3A OS=Mus musculus GN=Map1lc3a PE=1 SV=1	9.16	14329.5	470.06	Q91VR7	3	23.14	0	MLP3A_MOUSE	50.33	107.66	99.54	98.11	106.44	188.12	142.33	234.08	99.63	141.25	95.54	134.4	312.05	241.91	221.34	227.52	244.06	257.5	222.41	253.75	126.19	222.39	204.83	201.85	124.79	227.98		0.938333	4.60418	2.48785e-05	4.69882
Pgk1	Phosphoglycerate kinase 1 OS=Mus musculus GN=Pgk1 PE=1 SV=4	7.9	44949.8	302.61	P09411	5	16.31	0	PGK1_MOUSE	105.5	101.31	97.4	103.84	162.94	98.7	132.74	94.76	123.65	142.06	122.59	131.71	229.23	179.53	171.85	201.6	160.85	162.57	146.92	176.03	141.25	167.05	132.69	160.89	118.1	169.2		0.524267	4.66122	2.1816e-05	4.69062
Gnb2l1	Guanine nucleotide-binding protein subunit beta-2-like 1 OS=Mus musculus GN=Gnb2l1 PE=1 SV=3	7.56	35533	1699.43	P68040	15	69.72	0	GBLP_MOUSE	218.74	228.18	217.79	228.69	161.52	196.86	229.35	197.69	257.49	261.34	240.54	275.96	282.65	245.06	262.61	284.4	319.62	299.47	300.59	307.54	329.88	336.49	332.72	333.35	226.18	302.86		0.428134	4.66939	2.14099e-05	4.68897
Plp2	Proteolipid protein 2 OS=Mus musculus GN=Plp2 PE=2 SV=1	6.92	16949.8	2115.67	Q9R1Q7	2	17.76	0	PLP2_MOUSE	99.37	97.7	91.9	91	97.74	104.66	140.53	132.56	103.36	119.21	102.06	103.47	283.19	152.97	137.5	177.22	227.97	259.08	192.11	123.48	198.31	123.1	111.18	241.74	106.96	185.65		0.742744	4.59382	2.5479e-05	4.65347
Lancl1	LanC-like protein 1 OS=Mus musculus GN=Lancl1 PE=1 SV=1	7.63	46082.6	242.6	O89112	2	8.52	0	LANC1_MOUSE	60.14	NA	NA	NA	NA	NA	81.57	69.84	72.67	68.6	64.86	65.39	NA	92.33	99.26	106.42	92.65	85.09	90.72	101.45	85.12	93.74	82.12	98.82	69.01	93.43		0.438661	4.62414	2.37606e-05	4.6449
Coro1a	Coronin-1A OS=Mus musculus GN=Coro1a PE=1 SV=5	6.03	51673.6	527.74	O89053	5	21.48	0	COR1A_MOUSE	120.42	129.27	129.21	130.02	180.56	165.36	147.27	191.92	165.56	162.58	175.45	208.54	NA	NA	NA	NA	NA	NA	NA	93.83	100.13	86.08	98.38	102.23	158.85	96.13		-0.706588	4.55919	2.75937e-05	4.61362
Slc25a5	ADP/ATP translocase 2 OS=Mus musculus GN=Slc25a5 PE=1 SV=3	10.03	33159.5	4568.69	P51881	14	50.34	0	ADT2_MOUSE	556.35	610.36	513.44	464.8	557.68	577.19	782.8	716.3	394.83	416.89	407.01	472.26	668.42	623.19	602.37	643.72	1056.01	1023.66	969.09	967.91	889.28	860.38	847.19	905.73	539.16	838.08		0.641576	4.53138	2.94188e-05	4.57657
Des	Desmin OS=Mus musculus GN=Des PE=1 SV=3	5.03	53554.9	1838.83	P31001	4	7.25	0	DESM_MOUSE	235.5	232.87	219.69	213.76	115.84	107.12	121.93	140.55	188.71	199.89	204.89	216.04	100.77	90.08	89.38	67.15	124.59	107.56	77.75	133.07	130.66	119.46	124.05	112.02	183.07	106.38		-0.760371	4.45509	3.50678e-05	4.51951
Brox	BRO1 domain-containing protein BROX OS=Mus musculus GN=Brox PE=2 SV=1	7.55	46715.1	459.33	Q8K2Q7	4	13.63	0	BROX_MOUSE	135.18	125.41	130.72	137.35	157.63	174.09	158.65	134.37	134.81	169.21	129.91	140.37	266.79	324.15	261.5	251.48	195.48	217.85	171.1	208.82	182.06	179.46	183.45	143.18	143.98	215.44		0.553965	4.47109	3.37991e-05	4.50528
Rtn4	Reticulon-4 OS=Mus musculus GN=Rtn4 PE=1 SV=2	4.27	127127	732.75	Q99P72	10	15.75	0	RTN4_MOUSE	2002.93	2226.67	1758.37	1749.42	1609.61	1870.34	2516.88	2526.42	1701.01	1896.98	1591.78	1959.98	2824.5	2704.78	2109.49	2758.37	2326.89	2324.77	2347.39	2982.71	2803.48	3270.81	3104.5	4048.21	1950.87	2800.49		0.516456	4.4229	3.77659e-05	4.45295
Cct2	T-complex protein 1 subunit beta OS=Mus musculus GN=Cct2 PE=1 SV=4	5.95	57819.5	455.81	P80314	10	29.53	0	TCPB_MOUSE	1198.46	1402.8	539.72	559.05	841.61	1447.67	798.57	1840.02	754.07	1344.74	554.46	1054.97	1505.31	2424.78	1189.68	2460.77	1846.79	2403.54	1392.46	2506.21	1447.74	2482.63	1694.32	2211.83	1028.01	1963.84		1.00126	4.33543	4.61919e-05	4.44955
Mme	Neprilysin OS=Mus musculus GN=Mme PE=1 SV=3	5.46	86386.4	525.74	Q61391	11	21.73	0	NEP_MOUSE	297.49	286.09	313.22	306.1	240.96	243.27	251.93	284.07	364.78	347.75	359.2	402.04	NA	NA	NA	NA	249.26	220	224	220.22	190.52	196.84	203.82	158.25	308.08	207.86		-0.560601	4.40197	3.96307e-05	4.43752
Col1a1	Collagen alpha-1(I) chain OS=Mus musculus GN=Col1a1 PE=1 SV=4	5.51	139059	426.83	P11087	5	4.96	0	CO1A1_MOUSE	1689.68	1751.95	1909.96	1988.44	1096.81	1112.08	1226.77	1287.67	1196.14	1176.32	1409.13	1595.95	656.35	622.39	576.45	634.53	1208.5	1065.25	1125.72	1214.78	972.47	1005.33	817.46	915.72	1453.41	901.25		-0.706332	4.29371	5.085e-05	4.35142
C3	Complement C3 OS=Mus musculus GN=C3 PE=1 SV=3	6.27	188024	1607.8	P01027	62	50.03	0	CO3_MOUSE	1674.97	1714.83	1760.64	2122.52	2168.86	2309.97	2591.5	2318.39	1433.25	1323.36	1388.89	1534.27	2287.66	2090.02	2164.7	2248.52	3264.77	3281.4	2909.61	3060.12	2831.01	2796.21	3229.16	3085.83	1861.79	2770.75		0.588922	4.30693	4.93252e-05	4.34701
Col1a2	Collagen alpha-2(I) chain OS=Mus musculus GN=Col1a2 PE=2 SV=2	9.5	130070	792.97	Q01149	8	7.29	0	CO1A2_MOUSE	4477.93	4655.29	4599.59	4832.81	2432.9	2372.68	3218.44	3473.45	3887.38	3343.78	4094.56	3955.2	1872.46	1689.8	1518.13	1774.82	3018.76	2397.21	2828.32	2829.08	2266.36	2778.37	2459.85	2806	3778.67	2353.26		-0.683057	4.29107	5.11597e-05	4.3451
Bdh1	D-beta-hydroxybutyrate dehydrogenase, mitochondrial OS=Mus musculus GN=Bdh1 PE=1 SV=2	9.25	38641.2	234.37	Q80XN0	3	12.83	0	BDH_MOUSE	66.38	67.51	66.31	72.37	60.98	55.39	78.08	56.06	83.17	76.34	78.71	91.25	NA	NA	NA	NA	110.16	94.31	103.26	113.89	89.52	92.39	85.42	114.73	71.05	100.46		0.50724	4.29371	5.085e-05	4.32357
Prdx1	Peroxiredoxin-1 OS=Mus musculus GN=Prdx1 PE=1 SV=1	8.23	22404.6	16914.9	P35700	13	67.84	0	PRDX1_MOUSE	2095.44	2331.82	2094.27	2077.08	2105	2067.42	2261.73	2032.34	2527.48	2660.68	2291.24	2609.22	2890	2427.42	2412.5	2518.92	3323.47	2660.57	2800.96	3159.35	3353.97	3239.62	3325.51	2951.44	2262.81	2921.98		0.364943	4.29107	5.11597e-05	4.30656
Stip1	Stress-induced-phosphoprotein 1 OS=Mus musculus GN=Stip1 PE=1 SV=1	6.39	63209.5	450.98	Q60864	8	18.23	0	STIP1_MOUSE	191.77	169.8	164.01	166.64	150.03	167.15	125.89	123.26	151.66	144.87	150.81	155.3	NA	NA	NA	NA	124.7	115.36	125.87	108.71	103.57	114.24	125	105.9	155.1	115.42		-0.420074	4.28083	5.23808e-05	4.30139
Hist1h4a	Histone H4 OS=Mus musculus GN=Hist1h4a PE=1 SV=2	11.77	11367.4	9281.19	P62806	5	50.49	0	H4_MOUSE	258.93	207.18	290.01	243.96	212.13	219.57	234.82	301.13	268.94	264.55	276.75	252.84	151.93	139.6	131.03	151.81	192.39	180.66	207.14	234.29	191.31	218.85	169.9	226.52	252.57	182.95		-0.480178	4.24326	5.71139e-05	4.27034
Sfxn3	Sideroflexin-3 OS=Mus musculus GN=Sfxn3 PE=1 SV=1	9.78	35691.4	405.32	Q91V61	3	15.26	0	SFXN3_MOUSE	86.27	77.22	82.83	76.12	73.57	70.82	68.77	56.65	75.16	82.03	65.79	81.19	91.66	94.98	94.39	79.72	87.57	116.44	122.95	126.09	97.74	92.8	99.4	86.97	74.7	99.22		0.404499	4.24326	5.71139e-05	4.26249
Acaa1a	3-ketoacyl-CoA thiolase A, peroxisomal OS=Mus musculus GN=Acaa1a PE=1 SV=1	8.47	44409.6	231.68	Q921H8	3	13.44	0	THIKA_MOUSE	NA	NA	NA	NA	NA	NA	NA	NA	60.63	NA	47.7	NA	NA	106.46	126.18	99.92	86.78	96.73	101.16	102.19	78.11	97.97	98.09	91.47	54.17	98.64		0.865603	4.10167	7.91281e-05	4.19201
Arf6	ADP-ribosylation factor 6 OS=Mus musculus GN=Arf6 PE=1 SV=2	9.29	20196.2	967.05	P62331	5	38.86	0	ARF6_MOUSE	37.84	45.73	43.68	41.21	53.65	37.88	56.63	53.59	61.18	58.32	58.27	53.36	NA	54.35	65.43	55.64	74.66	60.17	72.63	72.47	77.05	82.03	72.18	78.91	50.11	69.59		0.480719	4.15445	7.00727e-05	4.18217
Fscn1	Fascin OS=Mus musculus GN=Fscn1 PE=1 SV=4	6.45	55249.4	1267.91	Q61553	18	47.87	0	FSCN1_MOUSE	227.02	229.23	327.89	330.47	520.26	410.25	546.21	448.95	391.55	375.04	453.52	425.88	628.02	539.97	539.15	521.78	611.79	525.52	592.64	625.31	550.34	552.04	528.87	541.99	390.52	563.12		0.573805	4.10167	7.91281e-05	4.14161
Eef1a2	Elongation factor 1-alpha 2 OS=Mus musculus GN=Eef1a2 PE=1 SV=1	9.35	50796.4	8805.61	P62631	15	57.67	0	EF1A2_MOUSE	585.33	470.85	462.72	572.29	516.83	635.79	655.97	726.42	765.64	769.7	717.69	845.64	844.86	759.52	702.02	694.53	1024.71	1130.4	1029.68	1215.83	903.9	908.29	903.1	1010.37	643.74	927.27		0.531485	4.08803	8.16527e-05	4.12243
Sccpdh	Saccharopine dehydrogenase-like oxidoreductase OS=Mus musculus GN=Sccpdh PE=2 SV=1	8.67	47699.7	409.41	Q8R127	2	6.53	0	SCPDL_MOUSE	99.2	97.77	102.13	96.78	NA	65.48	NA	NA	91.2	92.5	87.87	97.55	130.67	110.8	121.7	142.2	119.66	145.26	102.16	128.74	117.98	111.92	108.59	130.13	92.27	122.48		0.411435	4.10047	7.93477e-05	4.12106
Pcmt1	Protein-L-isoaspartate(D-aspartate) O-methyltransferase OS=Mus musculus GN=Pcmt1 PE=1 SV=3	7.59	24691.5	953.33	P23506	5	42.29	0	PIMT_MOUSE	107.4	100.17	100.8	99.59	97.15	106.59	105.65	110.52	114.38	108.33	106.45	121.4	178.37	141.72	161.61	176.78	137.21	109.16	126.92	139.58	119.51	131.42	118.89	124.75	106.54	138.83		0.368002	4.10167	7.91281e-05	4.11814
Atp6v1e1	V-type proton ATPase subunit E 1 OS=Mus musculus GN=Atp6v1e1 PE=1 SV=2	8.89	26214.5	536.82	P50518	5	20.8	0	VATE1_MOUSE	69.63	56.01	55.36	53.51	50.7	52.24	64.9	64.36	71.34	52.22	70.08	59.12	83.51	74.3	76.66	75.58	86.21	65.55	60.35	74.2	73.88	85.72	88.48	91.5	59.96	78		0.380285	4.08803	8.16527e-05	4.10568
Dusp15	Dual specificity protein phosphatase 15 OS=Mus musculus GN=Dusp15 PE=2 SV=3	9.57	26642.5	3362.67	Q8R4V2	9	52.34	0	DUS15_MOUSE	317.73	296.05	332.26	317.09	399.47	358.3	443.08	402.97	406.1	362.85	403.79	398.5	367.92	311.35	300.52	316.06	283.1	252.46	286.41	292.57	258.36	256.96	253.91	255.67	369.85	286.27		-0.368199	4.06744	8.56167e-05	4.08407
Rala	Ras-related protein Ral-A OS=Mus musculus GN=Rala PE=1 SV=1	6.99	23723.9	1256.74	P63321	5	33.5	0	RALA_MOUSE	125.88	123.09	112.44	111.33	87.14	90.66	95.26	108.45	126.74	117.22	127.43	130.79	86.97	75.92	79.98	88.17	86.58	84.31	86.22	88.27	94.82	96.62	96.03	94.94	113.04	88.24		-0.348437	4.06912	8.52868e-05	4.08401
Ppib	Peptidyl-prolyl cis-trans isomerase B OS=Mus musculus GN=Ppib PE=1 SV=2	10	23713.5	2491.15	P24369	12	57.87	0	PPIB_MOUSE	237.29	260.22	223.01	253.43	223.86	217.78	272.6	269.62	291.45	265.93	274.85	286.15	348.53	294.44	298.06	329.27	297.11	291.76	312.81	307.34	302.49	308.94	306	336.23	256.35	311.08		0.283688	4.06744	8.56167e-05	4.07732
Tubb4a	Tubulin beta-4A chain OS=Mus musculus GN=Tubb4a PE=1 SV=3	4.59	50042.1	19175.3	Q9D6F9	22	74.32	0	TBB4A_MOUSE	690.79	569	608.36	649.07	328.86	347.75	371.33	390.04	705.11	661.17	623.26	691.13	262.69	211.68	252.77	245.1	332.61	269.63	305.29	364.59	411.56	432.11	428.12	424.9	552.99	328.42		-0.738178	3.99964	0.000100083	4.06719
Rps25	40S ribosomal protein S25 OS=Mus musculus GN=Rps25 PE=1 SV=1	10.58	13799.2	607.77	P62852	2	15.2	0	RS25_MOUSE	26.55	26.45	23.88	25.67	25.22	21.88	26.93	26	31.66	33.71	37.05	32.6	40.59	31.78	33.06	36.92	33.81	33.84	31.6	37.54	37.82	47.88	42.31	44.44	28.13	37.63		0.423728	4.04398	9.03683e-05	4.06612
Aldh7a1	Alpha-aminoadipic semialdehyde dehydrogenase OS=Mus musculus GN=Aldh7a1 PE=1 SV=4	7.22	59374.8	455.84	Q9DBF1	9	29.87	0	AL7A1_MOUSE	235.79	189.36	176.1	243.94	266.54	287.76	289.32	138.93	280.85	233.29	296.3	326.43	205.96	201.4	205.18	189.19	NA	105.1	112.04	104.68	178.4	96.04	103.17	112.87	247.05	146.73		-0.783636	3.95267	0.000111515	4.0296
Sft2d2	Vesicle transport protein SFT2B OS=Mus musculus GN=Sft2d2 PE=1 SV=1	9.33	17898.4	820.57	Q8VD57	2	16.98	0	SFT2B_MOUSE	138.6	152.82	118.41	134.95	151.5	167.57	170.22	209.61	85.19	173.44	144.45	149.82	204.18	202.43	212.23	212.61	309.85	158.52	289.64	319.55	251.17	279.16	238.64	140.39	149.71	234.86		0.638876	3.94859	0.000112567	3.99994
Asah1	Acid ceramidase OS=Mus musculus GN=Asah1 PE=1 SV=1	8.53	45068.8	505.55	Q9WV54	7	24.62	0	ASAH1_MOUSE	154.6	148.47	111.21	137.04	81.39	104.15	99.26	102.7	133.09	130.43	104.65	116.85	152.74	NA	NA	161.04	135.69	132.84	154.54	195.04	165.62	216.64	187.25	229.84	118.65	173.12		0.545418	3.95267	0.000111515	3.99012
Tubb3	Tubulin beta-3 chain OS=Mus musculus GN=Tubb3 PE=1 SV=1	4.63	50875	18646.5	Q9ERD7	22	65.56	0	TBB3_MOUSE	2421.63	2204.99	1889.67	2064.45	1107.02	1125.36	1204.6	1256.72	2300.31	2292.8	2107.75	2268.87	880.78	783.61	817.45	944.53	982.64	907.18	921.56	1170.47	1244.88	1539.05	1453.58	1554	1853.68	1099.98		-0.733628	3.87488	0.000133389	3.94372
Gstp1	Glutathione S-transferase P 1 OS=Mus musculus GN=Gstp1 PE=1 SV=2	7.96	23780.3	2071.45	P19157	8	53.33	0	GSTP1_MOUSE	269.1	269.63	213.42	229.57	240.37	232.92	233.58	258.61	220.17	210.2	207.52	221.6	354.19	317.61	315.86	383.46	278.31	234.11	277.59	309.59	258.29	284.39	272.65	292.13	233.89	298.18		0.343728	3.92195	0.000119688	3.93698
Dlst	Dihydrolipoyllysine-residue succinyltransferase component of 2-oxoglutarate dehydrogenase complex, mitochondrial OS=Mus musculus GN=Dlst PE=1 SV=1	9.26	49336.8	295.19	Q9D2G2	5	13.44	0	ODO2_MOUSE	190.19	196.22	200.1	201.17	162.67	170.38	183.19	173.68	168.62	169.35	160.05	195.5	145.05	127.03	116.74	171.39	159.03	158.11	103.41	157.79	116.55	166.82	118.13	145	180.93	140.42		-0.379535	3.86759	0.000135646	3.88617
Map1a	Microtubule-associated protein 1A OS=Mus musculus GN=Map1a PE=1 SV=2	4.73	301509	164.44	Q9QYR6	5	2.02	0	MAP1A_MOUSE	593.6	575.86	610.41	637.33	257.66	354.39	281.65	377.14	556.5	513.59	583.42	594.42	NA	233.33	227.95	346.05	214.49	176.79	365.24	402.07	236.36	215.28	333.53	367.67	494.66	283.52		-0.792815	3.80299	0.000157402	3.88475
Atp1a2	Sodium/potassium-transporting ATPase subunit alpha-2 OS=Mus musculus GN=Atp1a2 PE=1 SV=1	5.23	113529	2461.78	Q6PIE5	28	32.06	0	AT1A2_MOUSE	848.65	859.53	855.77	868.03	1977.48	2150.68	1380.41	1350.4	939.71	901.42	818.7	921.31	494.37	1181.41	801.47	523.44	925.74	506.87	524.34	503.21	599.39	604.39	580.54	609.85	1156.01	654.59		-0.78853	3.783	0.000164818	3.8643
Vdac3	Voltage-dependent anion-selective channel protein 3 OS=Mus musculus GN=Vdac3 PE=1 SV=1	9	31094.9	1307.03	Q60931	6	29.33	0	VDAC3_MOUSE	821.67	790.9	751.25	688.38	825.1	838.86	1048.47	1021.25	965.65	1109.73	778.84	1125.45	1576	2287.11	1355.33	1555.75	1140.74	1395.61	1136.57	1075.43	1035.17	1132.16	1010.22	1150.07	897.13	1320.85		0.53563	3.8243	0.000149864	3.86163
Eef1a1	Elongation factor 1-alpha 1 OS=Mus musculus GN=Eef1a1 PE=1 SV=3	9.34	50456.1	19780.4	P10126	18	62.12	0	EF1A1_MOUSE	4558.87	4301.26	3336.14	3758.64	4162.23	5682.91	4726.01	6233.58	6032.61	6649.34	5488.36	6409.15	6032.28	6131.78	6012.75	5461.85	7056.91	7617.54	8149.84	9403.99	7044.34	8835.59	7302.44	8960.8	5111.59	7334.17		0.533136	3.80543	0.000156522	3.84259
Nefl	Neurofilament light polypeptide OS=Mus musculus GN=Nefl PE=1 SV=5	4.41	61565.6	13991.1	P08551	33	61.51	0	NFL_MOUSE	9534.09	9674	8753.06	7682.21	4896.6	4749.72	5984.76	6924.53	6913.96	6298.2	6736.57	7417.76	3519.47	2806.7	3089.31	3297.54	3727.44	2994.4	3701.54	4599.9	6253.38	5914.22	5944.63	7508.09	7130.45	4446.39		-0.723888	3.769	0.000170217	3.83788
Ywhag	14-3-3 protein gamma OS=Mus musculus GN=Ywhag PE=1 SV=2	4.61	28473.7	6046.77	P61982	11	51.42	0	1433G_MOUSE	411.05	490.4	433.88	415	169.41	183.16	204.77	221.86	285.08	305.61	286.54	321.14	158.65	131.05	131.22	156.19	188.12	180.72	171.89	190.92	210.64	237.51	193.15	227.74	310.66	181.48		-0.717913	3.74574	0.00017958	3.81392
	Ig kappa chain C region OS=Mus musculus PE=1 SV=1	5.07	11949	2425.92	P01837	4	63.21	0	IGKC_MOUSE	53.14	34.05	55.08	68.56	118.47	167.25	141.79	109.52	78.65	75.73	75.44	132.01	148.89	73.83	161.25	79.95	218.54	237.74	218.69	165.32	229.54	288.28	284.92	229.93	92.47	194.74		1.09798	3.61921	0.000240319	3.7821
Mag	Myelin-associated glycoprotein OS=Mus musculus GN=Mag PE=1 SV=2	4.85	70115.2	2674.47	P20917	12	24.6	0	MAG_MOUSE	3529.93	3124.1	3024.64	3075.74	2058.22	2231.52	2560.34	2428.27	3638.74	2394.2	3149.66	3378.87	2003.75	1457.43	1587.95	1391.4	2387.15	1885.74	2139.4	2325.01	2361.9	2434.59	2273.51	2175.08	2882.85	2035.24		-0.503906	3.73961	0.000182132	3.77341
Pcolce	Procollagen C-endopeptidase enhancer 1 OS=Mus musculus GN=Pcolce PE=1 SV=2	8.4	50852.4	236.85	Q61398	2	4.7	0	PCOC1_MOUSE	74.79	NA	67.06	73.94	87.05	87.75	85.15	73.47	111.44	110.28	135.11	121.12	164.69	121.07	135.8	150.54	128.33	117.1	120.9	191.5	109.99	114.91	136.31	111.08	93.38	133.52		0.532174	3.69119	0.000203617	3.72935
Rpl32	60S ribosomal protein L32 OS=Mus musculus GN=Rpl32 PE=1 SV=2	11.74	15973.9	485.72	P62911	2	16.3	0	RL32_MOUSE	28.14	27.8	27.92	27.91	NA	20.92	NA	NA	25.73	33.48	31.75	31.16	NA	NA	NA	NA	38.87	30.01	34.25	45.38	44.41	49.25	43.15	37.1	28.31	40.3		0.504492	3.62872	0.000235115	3.66362
Gdi2	Rab GDP dissociation inhibitor beta OS=Mus musculus GN=Gdi2 PE=1 SV=1	5.85	51050.5	5947.75	Q61598	29	76.4	0	GDIB_MOUSE	1988.65	1244.31	1388.77	1640.5	1724.74	2168.5	2315.23	1650.69	1784.49	1886.58	1265.06	1843.83	1178.95	933.36	1111.86	978.92	1491.63	1423.67	1524.21	1193.08	1373.58	1444.36	1302.98	1158.31	1741.78	1259.58		-0.459489	3.61932	0.00024026	3.64837
Cap1	Adenylyl cyclase-associated protein 1 OS=Mus musculus GN=Cap1 PE=1 SV=4	7.3	51907.1	3530.74	P40124	22	57.59	0	CAP1_MOUSE	7673.26	6957.55	7995.02	7826.25	6961.12	8161.41	8444.98	9630.36	7619.01	9321.35	7634.66	7315.89	9418.72	8419.86	10226	10461.6	11415.6	9019	9666.68	10823.6	9218.54	8485	9179.64	10433.5	7961.74	9730.65		0.290267	3.62872	0.000235115	3.64031
Cdc42	Cell division control protein 42 homolog OS=Mus musculus GN=Cdc42 PE=1 SV=2	6.15	21600.8	4320.57	P60766	10	62.83	0	CDC42_MOUSE	121.4	118.06	172.5	118.97	146.54	129.23	144.14	135.23	237.3	189.64	249.75	187.83	265.4	153.86	206.22	189.89	257.6	193.62	279.76	286.19	247.62	237.27	273.92	244.65	162.55	236.33		0.564775	3.58803	0.000258207	3.63221
Fbn1	Fibrillin-1 OS=Mus musculus GN=Fbn1 PE=1 SV=1	4.6	332854	154.8	Q61554	8	3.07	0	FBN1_MOUSE	1249.31	1292.3	1426.01	1411.99	880.89	869.72	1152.65	1094.68	1459.64	1423.32	1347.97	1601.18	NA	NA	740.52	736.07	846.47	837.76	777.53	825.31	1110.25	1098.58	1009.61	1036.8	1267.47	901.89		-0.483948	3.58325	0.000261066	3.61578
Tubb2a	Tubulin beta-2A chain OS=Mus musculus GN=Tubb2a PE=1 SV=1	4.59	50306.3	27503.8	Q7TMM9	23	67.87	0	TBB2A_MOUSE	878.17	789.14	783.27	753.95	371.47	364.74	415.06	415.81	879.01	862.03	854.28	886.71	354.8	316.34	314.73	352.69	341.48	320.55	353.92	411.84	455.01	546.6	502.56	536.94	687.8	400.62		-0.723801	3.50449	0.000312976	3.57845
Fam129b	Niban-like protein 1 OS=Mus musculus GN=Fam129b PE=2 SV=2	5.56	85446	305.34	Q8R1F1	7	16.02	0	NIBL1_MOUSE	232.24	186.51	218.81	231.35	188.12	249.3	259.22	261.25	301.39	297.31	263.89	269.81	279.84	244.76	282.53	300.67	315.61	310.83	327.74	336.21	364.16	391.31	328.08	313.85	246.6	316.3		0.364708	3.52037	0.000301736	3.53921
Sept9	Septin-9 OS=Mus musculus GN=Sept9 PE=1 SV=1	9.19	65917.2	265.62	Q80UG5	6	12.01	0	SEPT9_MOUSE	168.37	162.87	167.51	185.84	131.53	128.96	165.34	162.95	190.37	188.48	195.76	197.83	205.08	164.05	186.96	190.68	222.46	191.93	219.67	258.88	265.98	282.53	270.06	273.37	170.48	227.64		0.408117	3.46878	0.000339797	3.49271
Map2k4	Dual specificity mitogen-activated protein kinase kinase 4 OS=Mus musculus GN=Map2k4 PE=1 SV=2	8.06	44569.9	260.1	P47809	2	8.56	0	MP2K4_MOUSE	78.2	78.98	69.43	70.99	84.49	96.89	90.26	113.92	120.64	117.29	106.24	140.76	170.15	135.95	137.57	147.84	106.48	136.26	123.33	161.63	123.09	113.32	112.52	120.24	97.34	132.36		0.463795	3.42928	0.000372149	3.4605
Nefh	Neurofilament heavy polypeptide OS=Mus musculus GN=Nefh PE=1 SV=3	5.56	117280	5297.45	P19246	33	33.12	0	NFH_MOUSE	3513.4	3838.66	3118.29	3204.38	2263.91	2085.03	3424.31	2709.13	2619.61	2405.76	2273.6	2645.8	1561.12	1427.46	1437.98	1642.14	1585.09	1583.15	1521.13	1765.7	2907.12	2563.74	2576.65	2857.16	2841.82	1952.37		-0.570417	3.40368	0.000394747	3.45115
Gnao1	Guanine nucleotide-binding protein G(o) subunit alpha OS=Mus musculus GN=Gnao1 PE=1 SV=3	5.19	40654.9	936.33	P18872	6	20.34	0	GNAO_MOUSE	124.37	129.67	113.93	115.71	82.92	77.12	66.86	99.77	114.23	138.94	122.37	162.01	24.14	96.39	98.42	25.74	90.02	23.96	46.23	54.82	68.58	96.66	81.42	59.52	112.32	63.82		-0.952395	3.26195	0.000547085	3.39814
Tmed9	Transmembrane emp24 domain-containing protein 9 OS=Mus musculus GN=Tmed9 PE=1 SV=2	8.7	27241.3	666.97	Q99KF1	3	16.17	0	TMED9_MOUSE	66.82	59.83	62.71	61.67	47.4	60.87	51.8	53.35	77.1	62.53	75.96	72.19	71.43	70.69	87.55	70.49	83.6	80.52	75.94	79.02	90.88	73.82	77.06	70.53	62.69	77.63		0.317991	3.38076	0.000416137	3.39569
Tubb4b	Tubulin beta-4B chain OS=Mus musculus GN=Tubb4b PE=1 SV=1	4.6	50287.3	27147.2	P68372	23	71.24	0	TBB4B_MOUSE	1569.05	1325.69	1458.45	1345.41	677.98	702.38	779.24	723.25	1607.77	1480.04	1548.5	1558.32	582.13	487.97	506.77	526.8	724.26	586.55	739.44	745.88	923.56	981.04	974.78	988.88	1231.34	730.67		-0.721909	3.30596	0.000494356	3.38386
Tubal3	Tubulin alpha chain-like 3 OS=Mus musculus GN=Tubal3 PE=2 SV=2	5.24	50729.6	759.7	Q3UX10	3	7.4	0	TBAL3_MOUSE	190.84	209.48	201.59	207.5	81.94	86.51	91.11	93.55	139.76	137.5	137.53	138.66	54.57	51.6	53.13	59.28	81.68	75.41	67.87	75.16	123.59	129.75	115.55	112.64	143	83.35		-0.776194	3.26073	0.000548624	3.35184
Rab8b	Ras-related protein Rab-8B OS=Mus musculus GN=Rab8b PE=1 SV=1	9.43	23774.2	1708.4	P61028	4	21.26	0	RAB8B_MOUSE	70.17	95.23	73.47	78.47	58.74	51.74	123.28	125.92	84.48	106.02	84.28	86.35	171.88	157.77	129.16	116.92	143.81	130.59	124.9	125.24	77.4	161.98	84.81	118.06	86.51	128.54		0.582835	3.29955	0.000501709	3.35063
Ca2	Carbonic anhydrase 2 OS=Mus musculus GN=Ca2 PE=1 SV=4	6.53	29146.6	4632.76	P00920	11	67.69	0	CAH2_MOUSE	566.27	451.52	496.89	512.24	891.48	1100.42	1085.91	1244.49	353.87	293.16	324.85	346.07	864.27	744.65	847.32	808.8	1241.73	1226.65	1196.65	1237.91	948.44	1158.35	984.67	1101.91	638.93	1030.11		0.850274	3.21054	0.000615822	3.32123
Fasn	Fatty acid synthase OS=Mus musculus GN=Fasn PE=1 SV=2	6.12	275166	1462.06	P19096	80	47.08	0	FAS_MOUSE	9111.74	9679.26	11720.4	12395.4	10876	11111.2	15627.6	14813.2	11737.8	10316.6	12649.6	10398.4	13812.3	12343.2	15918.3	16096.1	19581.9	13555.4	18661.4	17172.6	17162.2	13448.8	12707	12830	11703.1	15274.1		0.384513	3.28824	0.000514942	3.31065
Mdh2	Malate dehydrogenase, mitochondrial OS=Mus musculus GN=Mdh2 PE=1 SV=3	8.82	36067.7	6565.76	P08249	14	56.21	0	MDHM_MOUSE	578.34	564.66	556.59	683.14	590.95	655.41	845.08	789.26	732.11	756.26	673.8	799.83	770.58	779.41	807.23	771.43	850.45	874.23	848.66	970.86	750.96	996.38	794.13	1005.71	685.45	851.67		0.319867	3.28942	0.000513544	3.30494
Atp1b1	Sodium/potassium-transporting ATPase subunit beta-1 OS=Mus musculus GN=Atp1b1 PE=1 SV=1	8.78	35593.8	2624.87	P14094	12	45.39	0	AT1B1_MOUSE	787.65	814.01	699.71	712.69	545.54	586.04	588.4	616.82	752.96	704.43	779.25	792.22	586.2	501.96	506.89	561.24	545.41	473.6	530.65	570.45	625.37	615.28	592.04	649.71	698.31	563.23		-0.304034	3.28942	0.000513544	3.30344
Sec31a	Protein transport protein Sec31A OS=Mus musculus GN=Sec31a PE=1 SV=2	6.29	134596	198.02	Q3UPL0	2	2.2	0	SC31A_MOUSE	198.38	230.78	NA	NA	NA	177.16	NA	NA	182.97	188.64	204.94	260.25	NA	NA	NA	NA	321.48	NA	271.52	329.44	263.61	266.15	253.78	267.9	206.16	281.98		0.457077	3.26345	0.000545193	3.2953
Cfh	Complement factor H OS=Mus musculus GN=Cfh PE=1 SV=2	6.6	143814	184.01	P06909	2	2.27	0	CFAH_MOUSE	200.89	NA	267.42	246.74	262.07	224.23	327.62	291.03	231.54	235.3	227.62	222.12	NA	NA	NA	NA	350.34	291.29	368.65	394.33	336.77	310.69	256.19	319.15	248.78	328.43		0.402094	3.26411	0.00054436	3.28879
S100a6	Protein S100-A6 OS=Mus musculus GN=S100a6 PE=1 SV=3	5.15	10107.7	948.25	P14069	3	24.72	0	S10A6_MOUSE	48.14	49.8	42.13	41.52	25.08	38.13	49.32	47.85	34.58	35.52	27.57	37.39	81.13	79.49	64.68	76.51	46.63	53.1	37.31	43.19	52.6	58.23	48.85	52.6	39.75	57.86		0.532162	3.2354	0.000581574	3.27887
Apoa1	Apolipoprotein A-I OS=Mus musculus GN=Apoa1 PE=1 SV=2	5.39	30615.6	4408.83	Q00623	15	47.73	0	APOA1_MOUSE	663.25	649.22	614.91	646.11	310.36	315.46	390.62	398.51	495.6	472.04	503.2	538.8	205.93	196.85	197.03	206.99	345.73	352.68	318.42	334.23	421.75	429.75	405.08	435.52	499.84	320.83		-0.659444	3.21109	0.000615042	3.27811
Rpn2	Dolichyl-diphosphooligosaccharide--protein glycosyltransferase subunit 2 OS=Mus musculus GN=Rpn2 PE=2 SV=1	5.44	69177.1	279.45	Q9DBG6	4	10.3	0	RPN2_MOUSE	169.76	187.74	175.8	201.84	162.84	165.73	193.74	165.97	215.33	166.18	201.68	268.49	272.28	NA	215.89	NA	346.48	288.89	438.73	225.19	328.39	170.58	266.57	216.65	189.59	276.96		0.512144	3.20711	0.000620717	3.24774
Ca3	Carbonic anhydrase 3 OS=Mus musculus GN=Ca3 PE=1 SV=3	6.99	29651.5	3050.01	P16015	15	85.77	0	CAH3_MOUSE	200.73	191.85	165.69	169.53	417.53	474.14	544.78	498.9	234.87	218.85	285.33	251.42	442.96	422.41	404.18	435.52	596.18	428.45	452.69	495.65	502.55	414.64	400.47	425.88	304.47	451.8		0.690677	3.16669	0.000681248	3.24114
Idh2	Isocitrate dehydrogenase [NADP], mitochondrial OS=Mus musculus GN=Idh2 PE=1 SV=3	8.85	51362.5	522.6	P54071	11	26.11	0	IDHP_MOUSE	240.52	234.54	214.3	224.14	243.43	261.81	295.27	329.76	303.85	380.96	334.82	391.43	283.84	316.95	292.95	326.18	400.44	378.08	385.09	447.28	487.54	503.84	463.34	495.2	287.9	398.39		0.469186	3.19601	0.000636785	3.23026
Cd9	CD9 antigen OS=Mus musculus GN=Cd9 PE=1 SV=2	6.96	25828.3	12397.5	P40240	7	28.76	0	CD9_MOUSE	7712.44	6580.39	8749.06	8646.84	7318.38	7642.91	9993.67	8373.28	11086.4	10119.1	10949.3	14331.1	14380	10189.2	14855.6	11185.9	13705.7	11963.7	11464.3	11105.9	11030	11363.6	12503.1	11368.8	9291.91	12093		0.403281	3.2026	0.000627196	3.22789
Cycs	Cytochrome c, somatic OS=Mus musculus GN=Cycs PE=1 SV=2	10	11719.5	9087.46	P62897	5	54.29	0	CYC_MOUSE	150.42	154.5	141.39	143.94	157.8	183.4	156.42	195.58	133.35	125.19	147.84	154.05	216.6	151.74	183.43	163.83	223.46	218.79	238.54	215.81	193.49	214.26	147.33	179.26	153.66	195.54		0.341296	3.20175	0.000628416	3.21989
Copb1	Coatomer subunit beta OS=Mus musculus GN=Copb1 PE=1 SV=1	5.61	108207	217.06	Q9JIF7	2	3.25	0	COPB_MOUSE	175.93	232.35	208.8	175.33	NA	NA	NA	NA	197.7	214.73	182.29	213.37	NA	NA	NA	NA	243.55	NA	242.64	258.78	251.45	278.49	239.62	332.66	200.06	263.89		0.397449	3.18116	0.000658935	3.20589
Atp1a1	Sodium/potassium-transporting ATPase subunit alpha-1 OS=Mus musculus GN=Atp1a1 PE=1 SV=1	5.14	114294	3843.88	Q8VDN2	41	46.14	0	AT1A1_MOUSE	1900.78	1819.2	1858.61	1864.24	1433.46	1362.87	1392.86	1446.94	1862.77	1775.28	1858.51	1957.38	1183	1142.47	1168.52	1132.54	1329.89	1230.25	1283.84	1095.41	1684.56	1368.71	1660.5	1776.58	1711.08	1338.02		-0.361794	3.17762	0.000664326	3.19815
Tuba4a	Tubulin alpha-4A chain OS=Mus musculus GN=Tuba4a PE=1 SV=1	4.75	50665.8	19322.1	P68368	21	58.93	0	TBA4A_MOUSE	11499.4	13941.7	10493.2	8562.23	4671.49	4682.58	4594.54	4748.02	9498.54	9980.63	9155.75	10134.7	4273.86	3597	3733.92	4469.49	4820.79	4081.42	4475.55	4931.17	6336.33	6361.46	6010.14	7024.3	8496.9	5009.62		-0.693095	3.07418	0.000842976	3.15135
Mapt	Microtubule-associated protein tau OS=Mus musculus GN=Mapt PE=1 SV=3	6.32	76585.7	713.03	P10637	9	20.74	0	TAU_MOUSE	541.45	656.73	546.03	722.19	572.58	992.38	637.63	1013.32	465.96	683.1	409.82	501.37	796.28	1335.56	874.23	1742.24	887.48	1337.37	781.31	1532.09	611.24	911.94	677.52	847.77	645.21	1027.92		0.647812	3.06948	0.00085216	3.13709
Rpl18	60S ribosomal protein L18 OS=Mus musculus GN=Rpl18 PE=2 SV=3	12.19	21701.6	805.59	P35980	4	22.34	0	RL18_MOUSE	87.67	95.05	87.11	84.72	70.24	85.36	77.46	73.05	101.15	104.1	91.63	102.06	97.02	94.95	97.19	103.24	95.4	131.39	90.71	106.87	123.36	127	130.49	131.39	88.3	110.75		0.323019	3.08387	0.000824378	3.10074
Arpc2	Actin-related protein 2/3 complex subunit 2 OS=Mus musculus GN=Arpc2 PE=1 SV=3	6.98	34471.2	273.77	Q9CVB6	3	10	0	ARPC2_MOUSE	77.46	68.75	76.77	68.04	52.38	55.01	77.61	72.02	74.49	77.91	70.39	82.41	102.15	86.35	74.66	111.32	96.66	99.63	90.24	112.21	71.46	80.37	67.84	104.71	71.1	91.47		0.356109	3.06852	0.000854042	3.08912
Dync1i2	Cytoplasmic dynein 1 intermediate chain 2 OS=Mus musculus GN=Dync1i2 PE=1 SV=1	5	68793.4	276.42	O88487	3	6.86	0	DC1I2_MOUSE	166.82	165.6	147.8	168.26	131.29	146.62	160.11	161.98	182.3	171.88	169.9	173.71	182.74	178.83	181.76	181.89	176.94	171.39	177.08	217.25	232.8	255.63	205.16	196.08	162.19	196.46		0.270832	3.07418	0.000842976	3.08609
Atp2a1	Sarcoplasmic/endoplasmic reticulum calcium ATPase 1 OS=Mus musculus GN=Atp2a1 PE=1 SV=1	4.95	110794	725.29	Q8R429	22	31.09	0	AT2A1_MOUSE	260.22	189.91	203.51	252.5	200.41	249.78	250.6	255.96	853.72	932.74	770.11	872.19	NA	NA	NA	NA	1207.88	1280.81	1249.45	1400.6	564.34	602.6	559.73	554.25	440.97	927.46		1.25793	2.81401	0.00153457	3.08238
Cd47	Leukocyte surface antigen CD47 OS=Mus musculus GN=Cd47 PE=1 SV=2	8.7	33610.8	731.63	Q61735	2	8.91	0	CD47_MOUSE	345.13	230.06	256.9	294.55	266.06	347.63	334.64	318.38	391.55	432.79	302.47	325.34	512.04	385.23	518.7	336.97	396.22	375.44	413.37	386.96	374.86	337.37	418.5	427.15	320.46	406.9		0.352626	3.01447	0.000967221	3.03503
Ap2a2	AP-2 complex subunit alpha-2 OS=Mus musculus GN=Ap2a2 PE=1 SV=2	6.5	104929	448.2	P17427	14	23.45	0	AP2A2_MOUSE	314.32	334.34	508.8	411.18	281.5	218.85	320.31	257.76	393.81	358.17	474.12	464.49	519.38	415.61	487.05	644.96	499.14	423.68	382.25	405.12	511.34	503.25	513.62	477.16	361.47	481.88		0.44444	2.98326	0.0010393	3.01618
Ces1d	Carboxylesterase 1D OS=Mus musculus GN=Ces1d PE=1 SV=1	6.16	62073	282.37	Q8VCT4	7	17.17	0	CES1D_MOUSE	1020.4	1085.39	906.58	969.27	1517.83	1784.34	1805.91	1950.63	718.12	657.53	673.12	662.4	1117.91	1314.68	1303.26	876.55	2368.01	2185.68	1889.9	2481.94	2291.77	2358.69	2227.82	2515.8	1145.96	1911		0.775263	2.87137	0.00134473	2.97418
Rpl14	60S ribosomal protein L14 OS=Mus musculus GN=Rpl14 PE=1 SV=3	11.48	23678.2	481.7	Q9CR57	2	10.6	0	RL14_MOUSE	85.48	82.28	76.62	73.52	52.54	55.18	64.2	65.51	97.3	91.3	97.12	93.9	86.19	81.83	83.51	88.82	105.03	91.31	98.94	108.72	118.38	109.49	120.21	134.29	77.91	102.23		0.404221	2.94041	0.00114706	2.96807
Pygm	Glycogen phosphorylase, muscle form OS=Mus musculus GN=Pygm PE=1 SV=3	6.67	97742.7	352.61	Q9WUB3	9	14.01	0	PYGM_MOUSE	15.38	15.45	14.84	14.97	17.66	15.81	16.81	20.24	284.8	249.89	295.22	283.29	NA	NA	NA	NA	247.77	204	232.14	245.22	112.95	105.03	115.76	124.62	103.7	173.44		1.95539	2.22512	0.00595502	2.96221
Serpinh1	Serpin H1 OS=Mus musculus GN=Serpinh1 PE=1 SV=3	9.19	46647.7	4163.43	P19324	14	45.56	0	SERPH_MOUSE	585.4	572.4	805.16	584.85	633.62	618.29	652.57	696.9	778.3	680.85	1048.67	799.44	805.96	708.18	636.56	748.69	1215.87	877.38	1089.19	1039.32	1018.79	984.89	1392.29	955.35	704.7	956.04		0.427801	2.90672	0.00123958	2.93804
Mcts1	Malignant T-cell-amplified sequence 1 OS=Mus musculus GN=Mcts1 PE=2 SV=1	9.12	20783.4	467.83	Q9DB27	4	32.04	0	MCTS1_MOUSE	39.5	40.35	39.7	43.18	58.11	55.48	53.24	57.8	62.27	55.94	56.01	60.31	72.03	54.87	64.15	81.08	72.43	63.44	71.21	71.06	53.56	56.03	53.41	74.09	51.82	65.61		0.346125	2.88967	0.00128922	2.91033
Hadh	Hydroxyacyl-coenzyme A dehydrogenase, mitochondrial OS=Mus musculus GN=Hadh PE=1 SV=2	9	34635	1130.53	Q61425	9	59.24	0	HCDH_MOUSE	153.93	148.94	226.78	184.97	239.12	251.31	318.76	199.5	232.3	205.53	316.94	281.27	120.3	84.34	155.48	107.37	279.39	172.31	186.26	172.28	177.86	177.07	143.73	124.8	229.95	158.43		-0.560459	2.83715	0.00145494	2.89198
Rpl8	60S ribosomal protein L8 OS=Mus musculus GN=Rpl8 PE=1 SV=2	11.45	28252.8	382.75	P62918	3	13.62	0	RL8_MOUSE	94.24	86.14	83.2	70.49	78.28	113.13	109.97	114.13	86.17	82.24	72.59	81.09	117.75	117.38	101.7	127.61	98.83	169.38	102.09	104.78	103	105.98	98.6	109.06	89.31	113.01		0.34119	2.87137	0.00134473	2.89156
Rps2	40S ribosomal protein S2 OS=Mus musculus GN=Rps2 PE=2 SV=3	10.65	31516.5	494.31	P25444	6	23.21	0	RS2_MOUSE	106.96	100.5	86.53	90.49	62.82	73.74	83.95	66.69	117.48	117.6	103.68	110.91	132.6	122.18	128.94	159.74	71.42	106.55	116.8	129.4	117.83	153.27	124.01	155.24	93.45	126.5		0.438825	2.85169	0.00140704	2.88526
Msn	Moesin OS=Mus musculus GN=Msn PE=1 SV=3	6.18	67881.2	3169.33	P26041	31	58.41	0	MOES_MOUSE	911.74	789.74	860.41	937.17	710.26	801.38	872.38	1006.65	894.21	958.33	794.24	919.13	930.18	1000.69	1008.96	1145.05	874.62	908.79	930.84	1115.98	1039.16	1200.65	1066.16	1283.85	871.3	1042.08		0.255183	2.87137	0.00134473	2.88268
Tkt	Transketolase OS=Mus musculus GN=Tkt PE=1 SV=1	7.23	68314.9	9597.94	P40142	31	78.17	0	TKT_MOUSE	2712.66	3255.18	2419.6	2542.2	3728.74	4148.03	4124.24	3646.81	4063.45	3924.51	4593.52	5167.11	4076.98	3249.7	4185.36	3999.37	6289.9	4573.88	5378.15	5834.5	5202.99	5321.26	6050.75	6242.1	3693.84	5033.74		0.454335	2.82918	0.0014819	2.86543
Slc25a10	Mitochondrial dicarboxylate carrier OS=Mus musculus GN=Slc25a10 PE=1 SV=2	9.53	32171.2	509.15	Q9QZD8	2	13.59	0	DIC_MOUSE	72.43	41.41	83.2	94.23	89.02	104.56	108.45	107.5	127.03	106.97	93.23	128.11	113.25	NA	143.75	NA	138.54	136.17	155.64	119.68	110.11	120.9	143.06	144.62	96.35	132.57		0.50377	2.81494	0.00153132	2.85966
Tubb2b	Tubulin beta-2B chain OS=Mus musculus GN=Tubb2b PE=1 SV=1	4.59	50409.4	27667.3	Q9CWF2	23	67.87	0	TBB2B_MOUSE	1929.53	1772.86	1734.79	1667.86	846.59	832.95	947.76	949.46	1942.1	1849.02	1846.64	1953.47	743.71	659.86	681.51	780.14	874.56	817.69	885.67	1030.04	1152.29	1399.8	1277.28	1375.78	1522.75	973.2		-0.616476	2.77399	0.0016827	2.84167
Ctnnd1	Catenin delta-1 OS=Mus musculus GN=Ctnnd1 PE=1 SV=2	6.41	105495	244.7	P30999	4	7.89	0	CTND1_MOUSE	171.78	202.85	221.55	197.15	254.95	258.16	240.21	227.58	208.32	213.53	224.24	237.96	NA	268	351.24	NA	240.35	274.58	277.17	263.84	250.3	232.06	238.66	331.41	221.52	272.76		0.296084	2.81889	0.00151742	2.8344
Mapk3	Mitogen-activated protein kinase 3 OS=Mus musculus GN=Mapk3 PE=1 SV=5	6.14	43408.7	983.31	Q63844	8	28.42	0	MK03_MOUSE	162.47	134.81	143.47	128.19	143.14	150.72	157.03	142.68	171.33	156.91	160.75	155.69	184.07	117.37	147.45	166.64	212.45	187.06	223.16	222.04	213.86	222.3	210.5	180.55	150.6	190.62		0.320811	2.81293	0.00153841	2.83116
Tubb5	Tubulin beta-5 chain OS=Mus musculus GN=Tubb5 PE=1 SV=1	4.59	50127.2	27709	P99024	23	69.14	0	TBB5_MOUSE	4552.17	4229.54	4160.01	4149.35	2034.32	1789.52	2223.36	2128.01	4581.84	4362.22	4356.62	4608.64	1684.33	1426.51	1772.82	1561.38	2288.55	2086.25	2025.72	2229.32	2813.39	3184.06	3140.97	2892.14	3597.97	2258.79		-0.635083	2.72962	0.0018637	2.80253
Apoa4	Apolipoprotein A-IV OS=Mus musculus GN=Apoa4 PE=1 SV=3	5.18	45029.1	1183.29	P06728	13	45.82	0	APOA4_MOUSE	291.95	286.43	295.88	250.65	114.48	96.88	133.77	125.74	245.64	229.21	242.12	258.56	NA	NA	NA	NA	105.11	110.16	114.2	115.8	135.65	141.81	136.25	130.46	214.28	123.68		-0.700915	2.70211	0.00198559	2.79154
Rps4x	40S ribosomal protein S4, X isoform OS=Mus musculus GN=Rps4x PE=2 SV=2	10.59	29825.9	457.22	P62702	4	20.15	0	RS4X_MOUSE	88.29	82.5	75.93	66.6	49.08	60.84	87.28	72.09	76.64	90	64.32	88.54	NA	NA	85.66	101.47	88.34	76.94	102.21	132.06	86.28	93.75	93.38	104.46	75.17	96.45		0.366578	2.74201	0.0018113	2.7664
Ube2v1	Ubiquitin-conjugating enzyme E2 variant 1 OS=Mus musculus GN=Ube2v1 PE=1 SV=1	8.22	16468.8	1110.11	Q9CZY3	6	49.66	0	UB2V1_MOUSE	76.69	69.54	89.15	74.38	56.92	57.71	79.02	69.13	64.81	61.27	60.04	63.09	95.7	84.52	85.81	95.34	97.16	76.38	79.7	90.06	76.15	73.63	66.69	74.08	68.48	82.93		0.279559	2.74201	0.0018113	2.75622
Rpl17	60S ribosomal protein L17 OS=Mus musculus GN=Rpl17 PE=2 SV=3	10.62	21651.3	779.99	Q9CPR4	4	31.52	0	RL17_MOUSE	62.72	54.34	67.69	83.67	56.25	59.29	64.75	63.22	79.1	70.8	79.47	85.31	77.95	62.35	96.31	64.12	93.34	86.51	88.79	73.64	100.88	102.22	105.72	99.24	68.88	87.59		0.341573	2.72538	0.00188202	2.7467
Prph	Peripherin OS=Mus musculus GN=Prph PE=1 SV=2	5.25	54381.7	9846.14	P15331	32	67.58	0	PERI_MOUSE	4554.94	4993.87	4718.3	2524.3	3324.25	3404.94	4620.51	4490.88	4359.16	4632.61	4927.35	5678.14	5604.86	4839.94	4900.43	5541.54	6049.02	5549.4	5452.27	5680.24	5049.01	5105.52	5573.21	5284.02	4352.44	5385.79		0.334613	2.72538	0.00188202	2.74584
Lama2	Laminin subunit alpha-2 OS=Mus musculus GN=Lama2 PE=1 SV=2	5.67	353054	127.81	Q60675	2	0.74	0	LAMA2_MOUSE	811.88	923.33	859.82	774.84	641.36	733.09	816.07	742.72	1090.93	1099.19	989.3	1124.77	NA	NA	NA	NA	NA	NA	NA	634.88	567.15	710.48	607.19	683.46	883.94	640.63		-0.447406	2.70696	0.00196356	2.74368
Rpl6	60S ribosomal protein L6 OS=Mus musculus GN=Rpl6 PE=1 SV=3	11.13	33566.7	590.17	P47911	5	20.61	0	RL6_MOUSE	88.98	74.44	82.28	93.58	64.65	62.12	75.65	65.47	103.33	94.6	95.48	106.32	NA	77.1	96.6	87.26	112.32	88.53	109.8	119.82	114.26	131.4	128.09	146.07	83.91	110.11		0.390213	2.70906	0.00195406	2.73702
Mlec	Malectin OS=Mus musculus GN=Mlec PE=2 SV=2	5.65	32513.2	672.39	Q6ZQI3	5	27.49	0	MLEC_MOUSE	110.88	103.15	128.57	126.69	73.56	61.33	90.91	87.41	103.59	101.77	101.54	112.06	155.56	112.44	129.14	109.44	143.06	138.05	107.74	103.54	127.87	128.49	128.63	124.98	100.12	125.74		0.347197	2.69534	0.00201679	2.71761
Rpl9	60S ribosomal protein L9 OS=Mus musculus GN=Rpl9 PE=1 SV=2	10.38	21995.5	429.22	P51410	4	28.65	0	RL9_MOUSE	55.97	47.11	65.22	62.3	64.21	55.71	72.73	63.58	67.77	63.34	69.11	78.18	NA	NA	65.51	NA	80.7	105.21	102.92	70.58	69.23	91.66	74.64	71.9	63.77	81.37		0.342601	2.69556	0.00201578	2.71724
Capns1	Calpain small subunit 1 OS=Mus musculus GN=Capns1 PE=2 SV=1	5.28	28577.2	575.74	O88456	3	17.47	0	CPNS1_MOUSE	50.85	52.27	45.09	46.15	54.5	42.52	44.32	47.03	56.02	56.26	49.78	53.87	NA	NA	NA	59.35	NA	56.01	51.25	63.1	53.04	64.49	65.68	65.07	49.89	59.75		0.260432	2.70293	0.00198184	2.71545
Dlat	Dihydrolipoyllysine-residue acetyltransferase component of pyruvate dehydrogenase complex, mitochondrial OS=Mus musculus GN=Dlat PE=1 SV=2	8.67	68512.1	323.22	Q8BMF4	8	18.38	0	ODP2_MOUSE	188.1	212.9	215	222.36	145.84	149.55	173.93	170.38	203.87	221.93	229.16	224.05	NA	NA	NA	NA	173.85	147.76	162.88	172.54	128.81	144.53	144	163.06	196.42	154.68		-0.334936	2.6875	0.00205351	2.70829
Dsp	Desmoplakin OS=Mus musculus GN=Dsp PE=1 SV=1	6.38	335365	997.17	E9Q557	28	11.31	0	DESP_MOUSE	NA	NA	506.36	NA	6524.96	7201.61	1248.1	1179.62	NA	NA	NA	NA	903.14	733.18	NA	NA	850.55	587.25	623.7	837.87	940.38	704.41	852.23	602.03	3332.13	763.47		-1.43506	2.29483	0.00507185	2.7066
Gdi1	Rab GDP dissociation inhibitor alpha OS=Mus musculus GN=Gdi1 PE=1 SV=3	4.76	51092	2215.67	P50396	15	49.89	0	GDIA_MOUSE	459.27	450.79	587.51	457.01	456.6	263.16	502.36	480.62	373.83	325.31	271.87	264.83	834.88	1040.4	718.63	772.18	501.16	555.2	461.21	553.33	288.64	641.09	410.82	637.41	407.76	617.91		0.57299	2.60179	0.00250155	2.66414
Capn1	Calpain-1 catalytic subunit OS=Mus musculus GN=Capn1 PE=1 SV=1	5.5	82790.8	177.32	O35350	2	4.07	0	CAN1_MOUSE	144.72	147.61	135.12	121.51	154.82	198.96	NA	201.28	154.08	146.76	153.48	180.45	NA	NA	NA	NA	183.13	188.92	181.82	232.94	195.74	211.84	183.91	188.61	158.07	195.86		0.320435	2.64022	0.00228972	2.65959
Hspa8	Heat shock cognate 71 kDa protein OS=Mus musculus GN=Hspa8 PE=1 SV=1	5.2	71099.3	8747.67	P63017	30	56.35	0	HSP7C_MOUSE	3025.71	3020.23	2431.14	2450.82	2338.12	2317.14	2732.37	2642.56	2932.52	3177.62	3020.22	3307.71	3713.28	3099.7	3151.59	3013.4	3631.02	2660.07	3285.14	3789.09	3037.06	3129.69	3671.16	3373.65	2783.01	3296.24		0.247	2.64022	0.00228972	2.65175
Vdac2	Voltage-dependent anion-selective channel protein 2 OS=Mus musculus GN=Vdac2 PE=1 SV=2	7.37	32360.2	1668.11	Q60930	10	46.44	0	VDAC2_MOUSE	259.77	254	232.75	233.82	206.89	237.24	196.99	189.5	290.98	228.5	239	322.5	256.55	224.26	229.33	237.83	342.13	341.67	320.41	316.93	307.98	370.79	334.15	389.37	241	305.95		0.336407	2.61511	0.00242598	2.63666
Ndufs1	NADH-ubiquinone oxidoreductase 75 kDa subunit, mitochondrial OS=Mus musculus GN=Ndufs1 PE=1 SV=2	5.37	80803.5	359.66	Q91VD9	9	20.36	0	NDUS1_MOUSE	286.08	276.07	265.3	260.8	199.7	218.47	240.8	255.95	243.75	238.07	241.97	264.4	249.73	245.22	267.8	319.04	304.94	270.1	305.08	325.9	283.2	305.17	292.41	304.55	249.28	289.43		0.216313	2.61396	0.00243244	2.62289
Uqcrb	Cytochrome b-c1 complex subunit 7 OS=Mus musculus GN=Uqcrb PE=1 SV=3	9.51	13527.5	295.46	Q9D855	2	22.52	0	QCR7_MOUSE	43.21	44.22	41.76	42	38.58	45.49	50.94	56.32	53.98	45.92	54.39	49.76	66.82	50.97	42.33	48.2	71.73	53.5	62.09	71.47	56.85	59.54	55.49	53.77	47.21	57.73		0.28335	2.60615	0.00247656	2.62151
Rps14	40S ribosomal protein S14 OS=Mus musculus GN=Rps14 PE=2 SV=3	10.53	16443.8	1519.8	P62264	5	37.09	0	RS14_MOUSE	56.58	68.42	50.65	51.78	45.71	42.08	51.73	54.99	64.13	65.29	60.57	62.6	61.36	64.18	53.57	56.53	79.6	67.19	80.41	103.82	69.76	66.18	67.99	75.25	56.21	70.49		0.319497	2.60179	0.00250155	2.62133
Vat1l	Synaptic vesicle membrane protein VAT-1 homolog-like OS=Mus musculus GN=Vat1l PE=2 SV=2	4.79	46159.6	3146.75	Q80TB8	18	60.67	0	VAT1L_MOUSE	768.45	827.12	642.92	664.94	400.9	460.6	495.86	504.44	541.75	560.16	479.39	546.5	457.74	496.35	443.37	497.37	423.67	413.82	438.76	533.67	416.89	453.15	359.6	473.48	574.42	450.66		-0.326232	2.59932	0.0025158	2.61972
Ndufb10	NADH dehydrogenase [ubiquinone] 1 beta subcomplex subunit 10 OS=Mus musculus GN=Ndufb10 PE=1 SV=3	8.08	21309	574.2	Q9DCS9	4	27.27	0	NDUBA_MOUSE	41.21	43.91	39.22	38.69	44	49.77	45.62	55.33	45.91	43.19	43.77	46.43	NA	NA	NA	NA	60.93	64.46	62.35	67.36	41.94	54.59	46.49	48.49	44.75	55.82		0.306917	2.57718	0.00264743	2.59539
Ywhaq	14-3-3 protein theta OS=Mus musculus GN=Ywhaq PE=1 SV=1	4.49	28063.5	8375.38	P68254	11	53.47	0	1433T_MOUSE	450.1	411.78	444.69	411.32	139.34	132.8	167.43	160.83	214.1	244.34	198.03	224.19	133.63	133.35	115	100.25	159.67	165.66	134.57	166.63	200.79	216.51	180.34	187.93	266.58	157.86		-0.647642	2.51209	0.00307543	2.59423
Atp5c1	ATP synthase subunit gamma, mitochondrial OS=Mus musculus GN=Atp5c1 PE=1 SV=1	9.36	33000	388.86	Q91VR2	4	15.1	0	ATPG_MOUSE	99.84	115.14	91.62	103.3	83.15	92.01	92.83	103.71	111.48	106.45	103.84	121.09	105.51	103.93	94.95	105.15	138.64	121.75	132.45	159.62	127.74	127.32	119.13	141.64	102.04	123.15		0.263712	2.55022	0.00281696	2.56382
Entpd2	Ectonucleoside triphosphate diphosphohydrolase 2 OS=Mus musculus GN=Entpd2 PE=1 SV=2	8.33	54946.8	743.01	O55026	7	18.38	0	ENTP2_MOUSE	358.73	354.78	318.21	342.34	195.76	178.53	225.97	201.16	278.27	278.23	287.2	323.39	161.83	170.26	138.96	163.7	181.18	157.48	173	217.44	262.31	291.53	261.29	274.11	278.55	204.42		-0.45215	2.49751	0.00318044	2.53811
Ube2m	NEDD8-conjugating enzyme Ubc12 OS=Mus musculus GN=Ube2m PE=2 SV=1	7.71	21185.1	760.62	P61082	6	35.52	0	UBC12_MOUSE	73.84	71.62	90.99	84.08	142.72	135.48	49.05	88.77	44.83	86.32	87.64	68.03	72.48	144.7	66.99	188.33	140.9	116.54	128.24	154.34	146.41	111.67	113.35	106.46	85.28	124.2		0.562862	2.47338	0.00336218	2.53662
Copa	Coatomer subunit alpha OS=Mus musculus GN=Copa PE=1 SV=2	7.42	140086	209.95	Q8CIE6	4	4.82	0	COPA_MOUSE	260.02	233.81	208.78	220.01	NA	192.67	NA	NA	292.64	280.29	265.83	317.98	NA	NA	NA	NA	270.7	285.24	277.51	369.61	302.55	359.67	360.42	363.09	252.45	323.6		0.364311	2.508	0.00310456	2.53432
Mif	Macrophage migration inhibitory factor OS=Mus musculus GN=Mif PE=1 SV=2	7.16	12675.4	1411.39	P34884	3	24.35	0	MIF_MOUSE	84.94	45.72	121.03	110.59	75.66	54.01	92.08	60.07	40.33	51.61	45.56	50.67	132	106.33	103.7	104.9	166.93	116.5	93.23	98.48	99.55	94.59	55.67	55.62	69.36	102.29		0.594791	2.45487	0.00350855	2.5259
Ywhah	14-3-3 protein eta OS=Mus musculus GN=Ywhah PE=1 SV=2	4.61	28382.9	4801.96	P68510	10	45.93	0	1433F_MOUSE	229.54	231.54	225.47	228.5	108.26	109.7	111.94	96.42	157.01	158.6	150.59	169.96	91.73	78.95	86.92	85.61	120.83	106.16	106.36	105.04	144.97	156.84	132.05	147.18	164.79	113.55		-0.502874	2.47148	0.00337692	2.52212
Rac1	Ras-related C3 botulinum toxin substrate 1 OS=Mus musculus GN=Rac1 PE=1 SV=1	8.57	21849.3	8059.78	P63001	6	36.46	0	RAC1_MOUSE	580.37	656.11	632.35	555.88	438.56	426.68	534.98	590.75	955.44	898.45	972.02	971.81	582.05	503.55	493.67	500.91	470.41	434.01	438.08	538.84	540.23	522.86	458.16	506.16	684.45	499.08		-0.400843	2.48855	0.00324679	2.52062
Pmp2	Myelin P2 protein OS=Mus musculus GN=Pmp2 PE=2 SV=2	10	15049.5	28736.9	P24526	10	65.15	0	MYP2_MOUSE	3531.26	4109.81	4689.59	3990.39	3586.97	3915.11	4557.72	4445.46	4015.64	3597.6	4301.31	4511.78	3732.58	3451.52	3186.78	4060.46	3818.6	3538.31	3595.4	3956.17	2982.84	3567.77	3109.64	3614.94	4104.39	3551.25		-0.208243	2.49751	0.00318044	2.50618
Atp5i	ATP synthase subunit e, mitochondrial OS=Mus musculus GN=Atp5i PE=1 SV=2	9.74	8235.62	2164.53	Q06185	3	50.7	0	ATP5I_MOUSE	30.29	31.55	32.03	35.48	24.11	25.08	32.15	25.98	28.64	29	22.73	33.89	NA	NA	34.59	NA	35.58	38.45	52.62	35.54	28.84	31.02	34.8	38.3	29.24	36.64		0.319059	2.48159	0.00329922	2.50202
Hspa5	78 kDa glucose-regulated protein OS=Mus musculus GN=Hspa5 PE=1 SV=3	4.87	72536.2	1670.9	P20029	15	28.09	0	GRP78_MOUSE	356.58	362.06	364.56	337.16	325.97	332.89	324.45	326.08	370.47	345.05	376.05	392.83	364.66	327.28	322.1	368.46	444.49	386.08	396.95	458.76	504.93	488.09	480.19	499.58	351.18	420.13		0.243946	2.45653	0.00349517	2.46861
Col6a2	Collagen alpha-2(VI) chain OS=Mus musculus GN=Col6a2 PE=2 SV=3	5.97	111475	877.49	Q02788	20	26.79	0	CO6A2_MOUSE	819.11	771.51	863.84	826.97	596.72	784.68	902.94	655.61	1151.53	1125.75	1157.75	1291.3	524.48	366.21	432.27	405.08	811	732.98	707.83	739.2	976.49	735.29	831.89	687.68	912.31	662.53		-0.48489	2.41637	0.00383377	2.46455
Pkm	Pyruvate kinase PKM OS=Mus musculus GN=Pkm PE=1 SV=4	7.21	58415.3	6713.42	P52480	26	68.55	0	KPYM_MOUSE	1840.46	1877.82	1796.41	1679.42	1600.49	1412.95	1607.33	1562.89	1626.47	1570.14	1541.05	1659.52	1234.83	1197.83	1152.77	1241.65	1523.74	1265.78	1316.46	1505.27	1531.14	1626.01	1619.98	1755.9	1647.91	1414.28		-0.229589	2.43355	0.00368514	2.44435
Itga6	Integrin alpha-6 OS=Mus musculus GN=Itga6 PE=1 SV=3	6.63	123299	313.27	Q61739	14	16.59	0	ITA6_MOUSE	549.35	595.94	517.85	539.95	402.87	414.91	452.8	424.62	536.13	529.67	510.97	530.64	384.4	370.1	396.42	395.38	360.15	326.02	342.6	427.38	495.46	478.55	494.23	536.52	500.47	417.27		-0.269368	2.38911	0.00408217	2.40425
Surf4	Surfeit locus protein 4 OS=Mus musculus GN=Surf4 PE=2 SV=1	7.82	30609.2	203.88	Q64310	2	8.55	0	SURF4_MOUSE	52.65	NA	55.68	55.53	43.81	NA	NA	NA	56.71	59.17	55.36	53.2	NA	NA	NA	NA	58.24	NA	63.16	NA	71.31	70.87	72.64	60.92	54.01	66.19		0.292973	2.38034	0.00416544	2.3983
Ndufa10	NADH dehydrogenase [ubiquinone] 1 alpha subcomplex subunit 10, mitochondrial OS=Mus musculus GN=Ndufa10 PE=1 SV=1	7.73	40888.6	642.2	Q99LC3	6	25.63	0	NDUAA_MOUSE	97.98	97.28	119.84	108.88	100.02	86.93	99.33	100.15	103.22	102.81	120.25	128.13	NA	NA	NA	NA	158.47	144.52	128.61	120.12	132.44	137.66	107.43	99.2	105.4	128.56		0.279764	2.38034	0.00416544	2.39672
Rhog	Rho-related GTP-binding protein RhoG OS=Mus musculus GN=Rhog PE=2 SV=1	8.08	21764.7	2370.98	P84096	3	22.51	0	RHOG_MOUSE	34.05	31.31	35.84	30.38	28.31	27.78	28.15	31.41	40.23	40.6	38.44	39.6	40.63	42.4	39.09	34.35	42.65	32.41	38.27	42.48	53.46	42.01	37.18	38.63	33.84	40.3		0.255216	2.38034	0.00416544	2.39398
Vat1	Synaptic vesicle membrane protein VAT-1 homolog OS=Mus musculus GN=Vat1 PE=1 SV=3	5.92	43324.8	1521.04	Q62465	12	40.15	0	VAT1_MOUSE	273.86	275.51	278.07	299.87	213.26	230.25	234.41	254.42	253.19	221.83	244.03	291.29	293.8	181.63	303.87	278.59	365.81	292.35	313.83	328.58	325.06	348.67	372.08	402.57	255.83	317.24		0.293608	2.36773	0.00428815	2.38586
Epb41l2	Band 4.1-like protein 2 OS=Mus musculus GN=Epb41l2 PE=1 SV=2	5.15	110453	4414.96	O70318	49	60.53	0	E41L2_MOUSE	3644.94	3784.08	3267.28	3398.54	2804.64	3014.8	3496.26	3760.23	4315.87	3806.64	3510.72	4518.52	2904.98	2798.74	2648.14	2882.92	3106.77	3030.48	3219.01	3746.53	3089.74	3216.29	2921.71	3360.23	3610.21	3077.13		-0.224161	2.37262	0.00424014	2.38319
Vcl	Vinculin OS=Mus musculus GN=Vcl PE=1 SV=4	5.65	117288	759.05	Q64727	32	38.56	0	VINC_MOUSE	895.81	657.7	1249.82	1624.26	1126.75	821.38	1187.27	605.42	993.78	977.75	1294.82	1570.89	350.27	290.33	278.78	347.51	1089.04	768.92	674.2	416.32	1330.9	886.65	1174.81	984.29	1083.81	716		-0.746588	2.25603	0.00554589	2.37635
Glul	Glutamine synthetase OS=Mus musculus GN=Glul PE=1 SV=6	6.66	42861.1	418.07	P15105	6	25.74	0	GLNA_MOUSE	125.06	134.94	147.51	136.16	101.09	92.63	100.72	100.76	105.39	94.82	102.07	104.14	NA	NA	NA	101.67	75.87	76.92	72.81	77.75	101.8	102.69	101.01	103.04	112.11	90.4		-0.309241	2.33702	0.00460232	2.35739
Ilk	Integrin-linked protein kinase OS=Mus musculus GN=Ilk PE=1 SV=2	8.02	51886.6	353.15	O55222	2	5.53	0	ILK_MOUSE	104.4	95.83	70.51	73.02	69.63	76.69	95.59	93.94	130.38	124.3	90.66	121.36	NA	NA	NA	NA	105.29	131.34	90.41	101.42	135.6	148.25	145.49	153.59	95.53	126.42		0.412333	2.31569	0.00483401	2.35212
Ina	Alpha-internexin OS=Mus musculus GN=Ina PE=1 SV=3	5.18	55553.7	2417.38	P46660	10	19.36	0	AINX_MOUSE	202.64	202.4	188.32	180.01	104.13	93.32	139.5	138.15	176.93	193.3	171.07	203.43	190.01	167.89	182.36	188.63	212.75	182.28	193.12	208.6	256.25	261.67	227.94	247.06	166.1	209.88		0.365386	2.31041	0.00489315	2.33913
Atp5o	ATP synthase subunit O, mitochondrial OS=Mus musculus GN=Atp5o PE=1 SV=1	10.41	23420.6	2793.79	Q9DB20	11	63.38	0	ATPO_MOUSE	462.05	545.91	422.26	486.12	506.08	565.42	772.96	1080.75	342.75	334.98	365.15	361.7	452.64	466	419.73	597.51	855.32	781.1	861.05	976.16	859.13	977.2	832.85	773.16	520.51	737.65		0.534912	2.2642	0.00544252	2.32653
Uba1	Ubiquitin-like modifier-activating enzyme 1 OS=Mus musculus GN=Uba1 PE=1 SV=1	5.3	119007	323.26	Q02053	9	13.71	0	UBA1_MOUSE	512.73	475.29	527.64	703.21	NA	NA	NA	NA	346.56	247.83	305.72	540	NA	NA	NA	NA	395.53	NA	192.28	212.22	333.13	320.16	317.89	239.73	457.37	287.28		-0.641393	2.22512	0.00595502	2.31571
Dhrs1	Dehydrogenase/reductase SDR family member 1 OS=Mus musculus GN=Dhrs1 PE=2 SV=1	8.36	34518.6	288.38	Q99L04	2	8.31	0	DHRS1_MOUSE	59.06	57.43	50.58	47.08	NA	NA	NA	NA	57.95	42	44.45	53.84	NA	NA	NA	NA	67.11	NA	56.22	62.45	68.9	53.97	68.5	66.69	51.55	63.41		0.303184	2.29483	0.00507185	2.31477
Arf4	ADP-ribosylation factor 4 OS=Mus musculus GN=Arf4 PE=1 SV=2	7.04	20510.7	1930.48	P61750	6	42.22	0	ARF4_MOUSE	196.35	165.72	223.79	224.4	128	111.47	132.49	131.04	166.75	149.95	172.65	209.43	119.57	87.03	119.7	91.05	131.78	142.09	128.43	104.22	148.38	145.15	173.49	156.48	167.67	128.95		-0.371729	2.2573	0.00552963	2.28771
Hprt1	Hypoxanthine-guanine phosphoribosyltransferase OS=Mus musculus GN=Hprt1 PE=1 SV=3	6.23	24798.5	579.96	P00493	3	16.51	0	HPRT_MOUSE	42.23	41.95	39.02	36.92	55.57	56	56.44	56.04	47.61	53.29	46.28	51.13	NA	NA	NA	NA	NA	NA	NA	NA	35.7	38.93	34.4	39.9	48.54	37.23		-0.370112	2.2573	0.00552963	2.28744
Rpl31	60S ribosomal protein L31 OS=Mus musculus GN=Rpl31 PE=1 SV=1	10.97	14462.9	402.56	P62900	2	18.4	0	RL31_MOUSE	32.12	30.54	38.71	33.36	36.41	40.18	34.2	43.81	39.14	39.14	37.67	41.19	34.63	34.02	33.73	37.8	56.47	47.27	53.32	59.1	42.11	50.07	49.97	53.46	37.21	46		0.285886	2.2583	0.00551699	2.27632
Pdhb	Pyruvate dehydrogenase E1 component subunit beta, mitochondrial OS=Mus musculus GN=Pdhb PE=1 SV=1	6.44	39279.3	1510.71	Q9D051	9	33.98	0	ODPB_MOUSE	267.22	289.77	242.79	265.86	193.43	194.23	228.34	234.64	247.54	245.37	217.12	248.12	126.89	141.16	121.44	166.66	238.87	197.65	237.65	257.7	218.57	190.92	209.39	225.08	239.54	194.33		-0.333101	2.22512	0.00595502	2.24991
Ywhab	14-3-3 protein beta/alpha OS=Mus musculus GN=Ywhab PE=1 SV=3	4.57	28200.5	6264.42	Q9CQV8	11	51.63	0	1433B_MOUSE	375.35	415.4	357.96	351.55	206.41	245.45	152.56	186.5	229.4	262.46	217.08	246.26	122.44	121.62	119.12	123.27	280.64	166.57	174.49	210.79	273.37	207.68	233.44	264.56	270.53	191.5		-0.509148	2.18534	0.00652622	2.24387
Fam49b	Protein FAM49B OS=Mus musculus GN=Fam49b PE=2 SV=1	5.68	37061.2	292.63	Q921M7	2	8.64	0	FA49B_MOUSE	87	92.04	103.8	86.62	61.31	67.87	69.68	60.1	91.2	83.26	99.53	88.65	NA	NA	NA	NA	NA	NA	NA	60.54	NA	NA	52.91	62.68	82.59	58.71		-0.474407	2.18534	0.00652622	2.23624
Ube2n	Ubiquitin-conjugating enzyme E2 N OS=Mus musculus GN=Ube2n PE=1 SV=1	6.15	17194.9	4107.14	P61089	5	39.47	0	UBE2N_MOUSE	119.6	110.05	126.77	126.96	79.19	91.66	93.56	102.4	88.62	91.32	92.08	101.51	150.07	156.02	136.88	155.45	144.41	133.36	93.26	126.02	108.9	129.36	88.65	95.68	101.98	126.5		0.299658	2.20647	0.00621622	2.22673
Rufy3	Protein RUFY3 OS=Mus musculus GN=Rufy3 PE=1 SV=1	5.2	53292.3	674.29	Q9D394	11	29	0	RUFY3_MOUSE	240.87	219.66	258.91	293.67	464.11	605.65	579.71	478.53	394.87	428.14	383.63	478.69	517.82	475.53	456.03	476.69	511.15	531.97	472.47	416.7	543.9	559.99	517.78	610.24	402.2	507.52		0.401968	2.18534	0.00652622	2.222
Ppp1cb	Serine/threonine-protein phosphatase PP1-beta catalytic subunit OS=Mus musculus GN=Ppp1cb PE=1 SV=3	5.77	37985.3	281.01	P62141	2	9.48	0	PP1B_MOUSE	59.46	60.14	77.51	125.87	139.88	51.71	NA	56.6	85.29	53.51	106.13	129.76	NA	NA	NA	NA	144.74	NA	136.7	NA	106.83	122.36	142.41	98.24	85.99	125.21		0.625375	2.11789	0.0076228	2.20829
Mbp	Myelin basic protein OS=Mus musculus GN=Mbp PE=1 SV=2	10.05	27167.7	20350.3	P04370	6	21.6	0	MBP_MOUSE	51638.5	59940.7	62513.3	49933.5	40585.8	43311.5	63155.3	55928.9	56517	80072.4	75325.8	61224.3	63800.7	85652.7	57762.2	61499.7	88275.7	79533.1	76356	66897.1	75593	62030.2	63109.1	66114.8	58345.6	70552		0.286955	2.18534	0.00652622	2.2041
Ehd2	EH domain-containing protein 2 OS=Mus musculus GN=Ehd2 PE=1 SV=1	6.05	61345.7	1904.48	Q8BH64	22	57.46	0	EHD2_MOUSE	461.3	449.74	457.04	561.73	378.76	363.68	511.7	338.95	481.56	478.85	505.81	650.1	219.85	228.35	227.03	270.11	414.2	376.27	361.62	363.61	495.8	473.76	486.47	461.78	469.93	364.9		-0.40477	2.15006	0.00707845	2.18783
Dcn	Decorin OS=Mus musculus GN=Dcn PE=2 SV=1	8.85	40151.2	2880.58	P28654	10	31.92	0	PGS2_MOUSE	548.34	546.26	467.27	435.26	400.74	383.45	433.27	490.98	579.48	578.63	539.76	574.27	316.96	284.05	292.17	295.28	445.46	448.83	450.68	502.89	441.65	457.42	484.28	468.5	498.14	407.35		-0.306784	2.15006	0.00707845	2.17184
Nsf	Vesicle-fusing ATPase OS=Mus musculus GN=Nsf PE=1 SV=2	6.52	83183.9	328.96	P46460	10	17.61	0	NSF_MOUSE	311.07	319.71	348.45	284.29	245.39	208.38	235.38	253.66	261.69	255.96	305.7	275.78	233.33	245.16	189.13	220.05	217.84	168.68	223.15	229.32	268.61	279.19	251.99	262.66	275.46	232.43		-0.244529	2.13734	0.00728891	2.15128
Stxbp1	Syntaxin-binding protein 1 OS=Mus musculus GN=Stxbp1 PE=1 SV=2	6.51	67968.1	956.69	O08599	17	44.78	0	STXB1_MOUSE	285.59	258.38	276.82	308.76	171.52	197.78	249.02	274.06	296.84	286.41	307.67	296.67	202.37	189.23	191.07	207.57	204.29	181.53	208.9	230.72	245.93	267.59	259.64	265.97	267.46	221.23		-0.266604	2.13215	0.00737655	2.14875
Rhob	Rho-related GTP-binding protein RhoB OS=Mus musculus GN=Rhob PE=1 SV=1	4.91	22579.6	2299.7	P62746	5	40.31	0	RHOB_MOUSE	30.01	44.01	38.19	31.46	41.3	55.63	39.4	43.52	43.27	34.18	44.06	44.84	49.08	45.72	48.26	51.51	44.22	41.84	42.74	59.01	57.74	40.74	54.79	43.78	40.82	48.29		0.250611	2.13238	0.0073726	2.14706
Npc2	Epididymal secretory protein E1 OS=Mus musculus GN=Npc2 PE=1 SV=1	7.64	16784.2	442.71	Q9Z0J0	2	16.78	0	NPC2_MOUSE	40.59	38.28	45.27	45.77	42.52	41.03	39.87	40.51	31.98	27.69	28.06	31.55	79.46	76.13	55.36	63.46	46.08	49.58	39.14	41.91	31.51	41.47	39.46	38.18	37.76	50.14		0.371879	2.1061	0.00783254	2.13868
Atp2a2	Sarcoplasmic/endoplasmic reticulum calcium ATPase 2 OS=Mus musculus GN=Atp2a2 PE=1 SV=2	5.05	116512	309.83	O55143	9	11.4	0	AT2A2_MOUSE	233.41	185.89	225.82	219.37	126.69	168.61	164.05	187.58	405.06	397.46	347.13	435.02	NA	NA	NA	NA	405.07	459.97	483.4	455.29	291.08	313.48	303.88	245.25	258.01	369.68		0.590241	2.04834	0.00894658	2.13169
Ywhaz	14-3-3 protein zeta/delta OS=Mus musculus GN=Ywhaz PE=1 SV=1	4.53	27942.3	15204.8	P63101	12	53.88	0	1433Z_MOUSE	1117.93	1130.13	784.13	906.2	361.72	465.48	476.76	582.61	686.84	726.16	608.24	701.54	427.91	447.69	394.06	400.75	501.24	489.72	492.11	578.93	554	687.96	538.16	637.09	712.31	512.47		-0.417868	2.08425	0.00823657	2.12573
Tf	Serotransferrin OS=Mus musculus GN=Tf PE=1 SV=1	6.85	78890.9	9292.59	Q921I1	40	65.28	0	TRFE_MOUSE	6521.73	4519.81	4746.01	5332.85	5911.33	8597.01	9225.41	9773.98	5046.61	5740.95	3996.29	6196.82	5066.33	4089	5263.67	3917.08	4516.4	5905.95	4943.25	4447.71	5291.72	5521.05	4560.92	4106.22	6300.73	4802.44		-0.346799	2.09715	0.00799557	2.12563
Cs	Citrate synthase, mitochondrial OS=Mus musculus GN=Cs PE=1 SV=1	8.72	52021.9	1467.8	Q9CZU6	14	41.59	0	CISY_MOUSE	468.07	438.1	544.91	430.92	417.62	463.6	472.14	499.47	463.04	472.54	502.41	540.63	280.66	236.85	256.5	304.03	483.4	435.37	470.39	484.51	429.45	479.6	437.61	436.38	476.12	394.56		-0.311652	2.07046	0.00850234	2.09379
Ogdh	2-oxoglutarate dehydrogenase, mitochondrial OS=Mus musculus GN=Ogdh PE=1 SV=3	6.36	117647	483.91	Q60597	12	18.48	0	ODO1_MOUSE	617.38	545.05	532.82	590.91	571.29	782.18	658.15	859.68	648.02	757.56	555.49	684.69	1786.06	1128.84	1682.49	NA	843.77	465.91	829.93	938.59	656.55	731.58	672.01	743.15	650.27	952.62		0.454703	2.04329	0.00905131	2.09327
Mpz	Myelin protein P0 OS=Mus musculus GN=Mpz PE=1 SV=1	9.75	27792.9	17282.3	P27573	10	37.5	0	MYP0_MOUSE	108713	103451	126237	111989	97377.3	92996.9	123998	108535	117168	114083	116025	101189	122755	115303	163168	131862	111579	128816	144568	134405	122312	103120	135687	107576	110147	126762		0.197029	2.07594	0.00839568	2.08527
Add1	Alpha-adducin OS=Mus musculus GN=Add1 PE=1 SV=2	5.52	81045.9	347.8	Q9QYC0	8	18.1	0	ADDA_MOUSE	204.37	231.04	243.28	244.46	158.3	160.73	239.24	201.74	216.72	221.81	261.89	244.29	NA	NA	NA	NA	169.84	142.6	169.45	196.36	183.92	185.68	213.88	181.4	218.99	180.39		-0.272078	2.06711	0.00856819	2.08494
Hspg2	Basement membrane-specific heparan sulfate proteoglycan core protein OS=Mus musculus GN=Hspg2 PE=1 SV=1	5.85	408103	405.19	Q05793	41	17.48	0	PGBM_MOUSE	1738.32	1670.18	1704.89	1771.86	1980.47	1985.1	2218.47	2197.45	2696.07	2608.11	2471.37	2425.35	1225.58	NA	963.99	1080.88	1825.17	1709	1912.26	2021.13	1823.91	1876.61	1939.26	2202.63	2122.3	1689.13		-0.355482	2.04895	0.00893403	2.07956
Sod2	Superoxide dismutase [Mn], mitochondrial OS=Mus musculus GN=Sod2 PE=1 SV=3	8.82	24831.1	355.41	P09671	2	9.91	0	SODM_MOUSE	60.33	98.96	55.67	56.71	88.56	92.54	87.64	88.17	105.84	66.35	62.42	65.67	142.02	90.39	147.61	124.13	136.09	83.66	101.62	115.42	97.38	93.18	87.42	44.72	77.4	105.3		0.418266	2.03606	0.0092033	2.07857
Rps18	40S ribosomal protein S18 OS=Mus musculus GN=Rps18 PE=1 SV=3	11.41	17718.7	744.97	P62270	3	19.08	0	RS18_MOUSE	71.36	73.64	68.91	74.13	55.8	61.02	68.84	73.39	82.28	74.59	83.15	85.71	101.74	81.88	68.54	92.89	141.68	126.05	88.78	61.11	83.9	85.98	73.41	84.73	72.73	90.89		0.292749	2.04819	0.00894966	2.06901
Rps8	40S ribosomal protein S8 OS=Mus musculus GN=Rps8 PE=1 SV=2	10.72	24490.3	574.29	P62242	5	25.96	0	RS8_MOUSE	71.66	76.7	76.21	81.89	50.9	36.24	72.86	43.78	89.1	71.79	69.54	78.66	80.26	65.23	76.29	NA	74.31	84.54	74.6	86.92	93.53	98.01	95.91	102.48	68.28	84.73		0.343648	2.04	0.00912006	2.06874
Sparc	SPARC OS=Mus musculus GN=Sparc PE=1 SV=1	4.58	35305.5	438.73	P07214	2	9.27	0	SPRC_MOUSE	103.55	101.02	106.61	109.29	64.35	66.93	77.64	64.64	90.62	81.66	88.39	87.75	88.9	NA	NA	99.41	101.54	92.92	90.9	107.8	113.98	125.48	97.6	119.6	86.87	103.81		0.27191	2.04027	0.00911445	2.05831
Gmfb	Glia maturation factor beta OS=Mus musculus GN=Gmfb PE=1 SV=3	4.89	16894.2	631.2	Q9CQI3	2	21.13	0	GMFB_MOUSE	31.65	29.48	53.53	54.38	37.49	31.28	39.14	33.67	46.14	46.96	50.87	58.6	59.47	NA	53.26	NA	59.89	52.76	54.81	43.84	44.98	47.49	52.57	50.18	42.77	51.93		0.311493	2.02227	0.00950019	2.04612
Cct7	T-complex protein 1 subunit eta OS=Mus musculus GN=Cct7 PE=1 SV=1	7.78	60165.6	205	P80313	2	4.78	0	TCPH_MOUSE	121.29	122.18	141.03	110.53	139.03	143.2	131.65	126.14	143.3	121.89	143.42	136.22	193.53	162.74	155.06	204.21	141.26	148.99	154.87	147.69	128.02	130.84	119.88	151.98	131.66	153.26		0.207581	2.03281	0.00927245	2.04338
Taldo1	Transaldolase OS=Mus musculus GN=Taldo1 PE=1 SV=2	6.64	37558.1	1015.43	Q93092	10	32.34	0	TALDO_MOUSE	178.3	176.04	184.93	174.5	165.52	175.99	189.8	190.12	143.04	149.36	142.84	157.24	234.36	234.64	222.66	238.66	180.59	167.27	163.1	187.98	173.24	196.02	159.56	199.42	168.97	196.46		0.20975	2.01711	0.00961377	2.02798
Cav1	Caveolin-1 OS=Mus musculus GN=Cav1 PE=1 SV=1	5.59	20709.8	6028	P49817	9	63.48	0	CAV1_MOUSE	364.72	358.27	384.8	348.89	169.66	154.73	246.64	195.28	275.69	272.6	272.72	301.01	189.15	182.92	180.11	184.6	192.05	205.98	179.23	189.81	251.83	300.41	238.88	247.47	278.75	211.87		-0.358736	1.97431	0.0106094	2.00664
Rpl4	60S ribosomal protein L4 OS=Mus musculus GN=Rpl4 PE=1 SV=3	11.44	47438.9	616.3	Q9D8E6	9	27.68	0	RL4_MOUSE	140.16	131.81	134.08	130.22	98.61	101.93	98.31	127.54	162.37	153.39	172.87	168.51	158.82	146.44	125.84	137.86	147.59	148.92	147.21	179.14	166.43	195.24	173.4	197.56	134.98	160.37		0.261818	1.97868	0.0105031	1.99593
Gapdh	Glyceraldehyde-3-phosphate dehydrogenase OS=Mus musculus GN=Gapdh PE=1 SV=2	8.35	36095.2	15527.2	P16858	14	63.96	0	G3P_MOUSE	3481.31	3454.12	2833.32	3631.08	2735.35	2728.5	2363.48	2404.14	4344.41	3470.38	3948.57	4614.29	1933.22	1698.78	1717.35	1977.19	2891.66	2114.37	2455.89	2557.51	3445.18	3713.52	3370.78	3551.86	3334.08	2618.94		-0.37146	1.9457	0.0113318	1.98084
Arl8a	ADP-ribosylation factor-like protein 8A OS=Mus musculus GN=Arl8a PE=2 SV=1	7.83	21618	1139.27	Q8VEH3	7	48.39	0	ARL8A_MOUSE	90.99	62.27	100.87	95.55	67.68	50.11	72.7	65.06	71.17	89.57	105.83	94.23	109.62	83.26	87.74	71.44	101.06	85.44	93.04	99.96	109.14	105.39	95.4	118.05	80.5	96.63		0.284812	1.95602	0.0110657	1.97665
Actr1b	Beta-centractin OS=Mus musculus GN=Actr1b PE=1 SV=1	5.96	42395.5	614.29	Q8R5C5	4	21.01	0	ACTY_MOUSE	53.35	45.91	57.21	68.3	47.83	60.33	67.69	68.13	67.33	65.54	64.75	71.44	58.74	45.97	59.87	57.08	77.75	75.91	76.89	84.1	91.83	103.83	98.58	103	61.49	77.79		0.30943	1.93242	0.0116836	1.95704
Pafah1b1	Platelet-activating factor acetylhydrolase IB subunit alpha OS=Mus musculus GN=Pafah1b1 PE=1 SV=2	7.01	47240.4	461.72	P63005	7	23.66	0	LIS1_MOUSE	168.72	152.24	157.41	165.34	147.29	146.59	129.98	129.39	151.24	135.37	138.82	144.26	NA	105.09	152.83	143.12	87.34	116.78	86.18	144.03	135.86	146.4	131.15	140.56	147.22	126.3		-0.242585	1.94116	0.011451	1.95626
Rpl15	60S ribosomal protein L15 OS=Mus musculus GN=Rpl15 PE=2 SV=4	12.01	24260.2	900.89	Q9CZM2	7	33.82	0	RL15_MOUSE	63.27	51.06	78.83	79.16	53.38	49.1	60.37	48.68	79.68	73.72	92.83	88.75	84.06	NA	55.52	55.01	99.56	72.91	86.78	94.36	107.48	116.2	92.54	92.62	68.24	87		0.350379	1.91803	0.0120774	1.94977
Ppp2r1a	Serine/threonine-protein phosphatase 2A 65 kDa regulatory subunit A alpha isoform OS=Mus musculus GN=Ppp2r1a PE=1 SV=3	4.81	66121.1	684.58	Q76MZ3	14	31.75	0	2AAA_MOUSE	466.98	403.74	382.95	412.04	211.81	268.64	242.26	235.3	293.84	306.06	294.82	307.08	252.76	318.59	355.64	350.94	220.42	125.8	227.74	212.51	248.55	173.04	236.06	245.44	318.79	247.29		-0.378912	1.90716	0.0123833	1.94444
Rap1b	Ras-related protein Rap-1b OS=Mus musculus GN=Rap1b PE=2 SV=2	5.46	21052.9	5068.38	Q99JI6	10	72.83	0	RAP1B_MOUSE	191.99	155.4	210.74	192.3	183.13	177.54	226.45	148.86	267.2	235.48	256.52	272.71	327.67	216.67	247.51	207.41	278.59	224.34	256.16	208.99	304.01	242.44	253.21	224.7	209.86	249.31		0.261012	1.92589	0.0118607	1.9435
Sec23a	Protein transport protein Sec23A OS=Mus musculus GN=Sec23a PE=1 SV=2	6.65	87074.4	214.3	Q01405	5	7.97	0	SC23A_MOUSE	256.22	246.4	181.9	237.02	167.78	172.17	179.2	222.34	281.35	300.63	215.79	271.75	298.58	228.05	284.37	273.58	202.63	254.92	252.05	317.41	228.6	347.59	254.3	327.25	227.71	272.44		0.268312	1.91139	0.0122634	1.93013
Actr3	Actin-related protein 3 OS=Mus musculus GN=Actr3 PE=1 SV=3	5.51	47813.4	1044.16	Q99JY9	10	35.17	0	ARP3_MOUSE	226.46	205.51	252.82	266.47	243.89	200.08	264.4	210.7	267.06	241.9	269.73	328.22	145.17	138	139.58	162.45	282.93	186.27	209.98	218.96	280.73	238.89	224.23	245.29	248.1	206.04		-0.298814	1.89439	0.0127529	1.91781
Pa2g4	Proliferation-associated protein 2G4 OS=Mus musculus GN=Pa2g4 PE=1 SV=3	6.42	44041.1	276.08	P50580	3	11.42	0	PA2G4_MOUSE	96.85	95.46	94.78	92.8	106.61	103.72	125.79	116.85	86.41	77.94	87.52	93.16	NA	95.21	99.07	100.56	107.89	126.08	133.55	134.81	159.76	112.58	97.88	104.22	98.16	115.6		0.22868	1.88435	0.0130513	1.89817
Rps16	40S ribosomal protein S16 OS=Mus musculus GN=Rps16 PE=2 SV=4	10.57	16559.4	694.1	P14131	2	14.38	0	RS16_MOUSE	63.03	61.25	58.39	55.84	29.97	50.86	35.59	54.75	46.26	48.51	63.83	65.14	67.99	53.54	51.29	67.35	74.4	51.89	63.2	83.37	75.64	59.66	57.7	57.84	52.78	63.66		0.288757	1.87184	0.0134327	1.89398
Jup	Junction plakoglobin OS=Mus musculus GN=Jup PE=1 SV=3	5.69	82542.3	1571.27	Q02257	21	39.19	0	PLAK_MOUSE	112.18	113.65	197.79	151.93	1437.76	1406.65	204.41	170.68	128.02	113.69	102.59	101.98	180.61	163.04	NA	91.79	195.66	72.02	78.7	80.61	89.23	89.07	128.39	90.25	353.44	114.49		-0.895691	1.65835	0.021961	1.88478
Pygb	Glycogen phosphorylase, brain form OS=Mus musculus GN=Pygb PE=1 SV=3	6.27	97414.4	314.22	Q8CI94	8	14.71	0	PYGB_MOUSE	862.17	741.74	812.02	645.2	11578.6	10838.8	814.9	651.52	234.97	357.74	236.39	232.62	1128.38	1076.36	571.61	274.37	439.13	149.52	154.68	200.89	605.01	222.53	398.02	389.18	2333.88	467.47		-1.13635	1.49773	0.0317888	1.88002
Aco2	Aconitate hydratase, mitochondrial OS=Mus musculus GN=Aco2 PE=1 SV=1	7.83	86205	2361.93	Q99KI0	29	54.23	0	ACON_MOUSE	1806.79	1587.48	1459.14	1537.54	2291.2	2828.45	2797.95	3314.58	1689.7	1986.48	1484.23	1936.09	1986.88	2047.13	1993.4	1997.05	2860.96	3126.47	2962.32	3391.78	2410.18	2628.7	2348.3	2660.11	2059.97	2534.44		0.329045	1.84913	0.0141538	1.87818
Rpl27a	60S ribosomal protein L27a OS=Mus musculus GN=Rpl27a PE=2 SV=5	11.53	16719.5	750.91	P14115	2	15.54	0	RL27A_MOUSE	42.42	43.2	32.63	38.21	29.31	31.67	29.28	38.88	41.02	40.44	37.82	38.81	NA	NA	35.48	NA	44.56	33.07	45.59	55.86	40.98	46.82	41.03	51.14	36.97	43.84		0.240743	1.84216	0.0143827	1.85782
Ehd1	EH domain-containing protein 1 OS=Mus musculus GN=Ehd1 PE=1 SV=1	6.36	60659.9	607.92	Q9WVK4	10	30.52	0	EHD1_MOUSE	290.01	293.4	276.21	357.97	245.99	223.71	281.78	278.58	354.42	333.76	296.72	408.8	329.58	324.63	284.04	284.06	327.99	352.16	349.41	379.51	378.76	396.2	389.6	397.56	303.45	349.46		0.213258	1.84194	0.01439	1.85424
Cnp	2',3'-cyclic-nucleotide 3'-phosphodiesterase OS=Mus musculus GN=Cnp PE=1 SV=3	9.26	47522.6	22435.9	P16330	25	65.95	0	CN37_MOUSE	3581.31	4318.4	4011.37	3553.7	2362.81	2505.51	2903.57	2912.3	4491.27	4765.75	5219.1	5030.18	2554.12	2520.86	2149.81	2212.38	3238.74	2524.96	3118.39	2845.33	3281.35	3726.32	3721.51	3973.99	3804.61	2988.98		-0.329006	1.82369	0.0150076	1.85313
Dld	Dihydrolipoyl dehydrogenase, mitochondrial OS=Mus musculus GN=Dld PE=1 SV=2	7.81	54785.7	287.68	O08749	7	18.07	0	DLDH_MOUSE	350.05	334.11	335.91	320.71	288.61	287.66	376.86	417.38	347.25	363.24	328.94	353.21	227.41	216.44	211.17	250.97	312.12	332.22	335.58	384.48	291.38	325.15	326.07	334.26	341.99	295.6		-0.228517	1.83261	0.0147026	1.8468
Ddah1	N(G),N(G)-dimethylarginine dimethylaminohydrolase 1 OS=Mus musculus GN=Ddah1 PE=1 SV=3	5.56	31780.2	2027.68	Q9CWS0	12	68.07	0	DDAH1_MOUSE	227.86	242.68	205.77	207.74	227.24	243.9	240.21	257.58	231.89	221.29	227.39	255.21	243.61	256.28	235.2	254.7	276.51	231.86	241.67	281.18	244.11	233.51	294.96	274.33	232.4	255.66		0.13654	1.82369	0.0150076	1.82879
Ywhae	14-3-3 protein epsilon OS=Mus musculus GN=Ywhae PE=1 SV=1	4.44	29345	7423.08	P62259	15	60.78	0	1433E_MOUSE	721.16	792.19	631.31	693.84	250.98	282.12	295.87	332.85	439.38	438.75	378.04	496.35	385.17	330.36	252.94	274.25	315.98	508.14	280.93	345.49	350.5	377.62	338.8	366.57	479.4	343.89		-0.400249	1.76523	0.01717	1.81004
Rab6a	Ras-related protein Rab-6A OS=Mus musculus GN=Rab6a PE=1 SV=4	5.23	23703.9	1526.99	P35279	4	22.6	0	RAB6A_MOUSE	59.46	50.93	58.6	50.63	38.7	35.38	44.09	45.24	47.88	43.47	52.78	53.65	NA	48.22	54.72	66.98	54.2	52.04	48.72	59.28	53.22	51.06	57.06	62.55	48.4	55.28		0.200761	1.79645	0.0159792	1.80763
Col6a1	Collagen alpha-1(VI) chain OS=Mus musculus GN=Col6a1 PE=2 SV=1	5.03	109630	1188.82	Q04857	18	26.34	0	CO6A1_MOUSE	990.05	961.69	884.14	864.05	896.01	875.01	1071.85	1016.77	1554.68	1397.23	1402.5	1643.06	486.09	416.64	522.48	552.54	961.16	959.99	874.41	971.5	1165.36	1231.03	1162.3	1243.12	1129.75	878.88		-0.419451	1.72649	0.018772	1.77671
Plg	Plasminogen OS=Mus musculus GN=Plg PE=1 SV=3	6.17	93545.3	537.51	P20918	16	27.46	0	PLMN_MOUSE	363.7	324.37	382.74	373.96	401.58	397.98	481.44	440.91	335.58	315.55	329.07	400.52	402.13	360.23	310.24	350.07	541.09	485.13	469.8	485.01	511.79	479.8	448.61	437.92	378.95	440.15		0.208781	1.73697	0.0183243	1.74948
Ldhc	L-lactate dehydrogenase C chain OS=Mus musculus GN=Ldhc PE=1 SV=2	8.26	36254.1	1355.07	P00342	4	14.76	0	LDHC_MOUSE	91.35	89.97	93.92	102.58	78.24	73.91	106.78	144.94	134.47	121.75	120.37	106.8	122.08	126.42	115.77	128.47	157.42	161.48	106.96	186.19	123.4	103.1	96.99	99.12	105.42	127.28		0.271029	1.72605	0.0187911	1.7472
Rpl13	60S ribosomal protein L13 OS=Mus musculus GN=Rpl13 PE=2 SV=3	11.95	24362.5	477.18	P47963	4	18.01	0	RL13_MOUSE	78.3	81	77.97	81.45	79.67	41.7	70.94	66.87	84.83	88.7	89.69	92.96	58.4	73.36	75.05	95.71	95.12	97.76	89.36	92.26	118.16	104.95	114.33	123.06	77.84	94.79		0.280805	1.72379	0.0188892	1.74651
Rpl23a	60S ribosomal protein L23a OS=Mus musculus GN=Rpl23a PE=1 SV=1	10.89	17695.1	677.56	P62751	2	14.74	0	RL23A_MOUSE	113.33	74.59	103.13	106.47	82.42	82.84	87.35	95.31	147.2	78.38	135.61	85.31	83.83	91.94	88.67	105.23	116.47	121.18	148.63	164.94	145.31	93.93	157.54	172.73	99.33	124.2		0.309504	1.71055	0.0194737	1.73833
Gnaq	Guanine nucleotide-binding protein G(q) subunit alpha OS=Mus musculus GN=Gnaq PE=1 SV=4	5.34	42443.3	667.26	P21279	10	34.26	0	GNAQ_MOUSE	355.13	216.03	267.61	286.83	230.64	301.34	290.17	333.42	315.8	285.35	205.48	296.77	215.17	99.01	177.88	134.08	229.33	258.76	272.42	280.86	238.94	281.65	266.12	308.01	282.05	230.18		-0.341318	1.7012	0.0198976	1.7351
Lamb1	Laminin subunit beta-1 OS=Mus musculus GN=Lamb1 PE=1 SV=3	4.63	204333	213.79	P02469	9	5.54	0	LAMB1_MOUSE	526.7	519.13	463.76	495.58	350.13	356.25	398.7	437.49	548.9	462.15	548.52	513.67	NA	NA	NA	NA	NA	NA	NA	NA	NA	357.48	NA	345.31	468.42	351.4		-0.398973	1.68307	0.0207458	1.72971
Ogn	Mimecan OS=Mus musculus GN=Ogn PE=2 SV=1	5.4	34354.3	1487.68	Q62000	7	29.87	0	MIME_MOUSE	353.42	348.64	557.77	407.99	167.8	165.24	209.94	176.38	184.58	172.74	208.11	188.47	148.85	107.72	145.21	135.52	206.43	179.98	187.58	180.58	250.5	236.81	205.1	228.14	261.76	184.37		-0.419134	1.64776	0.0225029	1.70023
Rps3a	40S ribosomal protein S3a OS=Mus musculus GN=Rps3a PE=1 SV=3	10.18	30113	503.61	P97351	6	26.52	0	RS3A_MOUSE	69.99	73.46	68.94	71.08	59.69	63.74	78.31	71.78	93.33	98.05	86.61	97.26	78.73	80.63	62.02	78.99	81.1	91.61	78.55	96.82	109.44	110.05	119.61	123.69	77.69	92.6		0.242853	1.66965	0.0213969	1.68722
Rpl7a	60S ribosomal protein L7a OS=Mus musculus GN=Rpl7a PE=1 SV=2	11.01	30147.7	545.89	P12970	4	13.16	0	RL7A_MOUSE	88.41	94.58	96.51	90.08	63.92	67.62	68.22	67.01	104.68	95.44	101.72	104.65	89.84	93.74	82.27	89.64	97.12	81.73	93.78	107.98	109.98	123.67	115.8	124.01	86.9	100.8		0.222852	1.66666	0.0215446	1.68149
Hspd1	60 kDa heat shock protein, mitochondrial OS=Mus musculus GN=Hspd1 PE=1 SV=1	5.8	61126.7	610.81	P63038	11	28.1	0	CH60_MOUSE	290.05	234.76	391.54	489.01	476.31	422.32	513.29	227.21	500.15	388.28	495.26	674.46	282.07	159.87	161.55	183.4	497.07	428.78	401.72	254.42	465.74	396.42	368.73	251.93	425.22	320.98		-0.442731	1.61375	0.0243363	1.67338
D10Jhu81e	ES1 protein homolog, mitochondrial OS=Mus musculus GN=D10Jhu81e PE=1 SV=1	9.02	28432.7	527.4	Q9D172	2	18.8	0	ES1_MOUSE	66.47	42.21	40.42	NA	60.56	65.22	59.68	73.73	62.46	65.07	101.45	67.99	76.35	NA	73.95	68.08	81.29	71.7	89.3	96.41	66.16	81.7	57.13	72.29	64.11	75.85		0.269287	1.64776	0.0225029	1.66962
Ezr	Ezrin OS=Mus musculus GN=Ezr PE=1 SV=3	5.73	69521	1730.29	P26040	14	29.69	0	EZRI_MOUSE	116.69	123.14	172.61	139.05	193.21	102.14	175.1	113.81	162.87	113.19	194.54	178.19	129.24	122.64	120.87	134.76	324	169.97	170.74	221.6	275.11	186.31	276.85	217.14	148.71	195.77		0.354769	1.62873	0.0235109	1.66692
Aldh2	Aldehyde dehydrogenase, mitochondrial OS=Mus musculus GN=Aldh2 PE=1 SV=1	7.49	57050.9	1620.84	P47738	18	45.86	0	ALDH2_MOUSE	586.19	663.61	511.2	559.1	661.23	790.33	758.14	846.8	472.95	459.58	432.91	560.21	413.84	472.83	423.58	473.4	491.19	484.33	506.81	669.43	485.47	573.39	523.91	601.71	608.52	509.99		-0.235234	1.64776	0.0225029	1.66447
Rab5a	Ras-related protein Rab-5A OS=Mus musculus GN=Rab5a PE=1 SV=1	8.25	23826.8	1839.67	Q9CQD1	10	62.79	0	RAB5A_MOUSE	87.58	97.69	82.52	83.15	83.96	88.31	93.56	102.78	112.79	105.15	104.81	112.78	129.29	138.1	134.05	161.92	92.2	91.87	88.3	119.62	84.82	112.21	96.41	111.44	96.26	113.35		0.216262	1.64453	0.0226708	1.65869
Anxa7	Annexin A7 OS=Mus musculus GN=Anxa7 PE=1 SV=2	5.81	50210.5	227.34	Q07076	3	8.86	0	ANXA7_MOUSE	108.14	107.09	103.02	114.67	NA	NA	NA	NA	NA	NA	NA	74.75	NA	NA	NA	NA	NA	NA	NA	NA	68.93	NA	77.69	NA	101.53	73.31		-0.456954	1.59027	0.0256879	1.65462
Rsu1	Ras suppressor protein 1 OS=Mus musculus GN=Rsu1 PE=2 SV=3	9.33	31550.3	808.83	Q01730	4	24.19	0	RSU1_MOUSE	62.63	71.8	108.67	79.62	128.79	70.6	116.09	80.19	93.06	88.29	156.56	131.74	136.01	98.92	83.14	130.36	191.67	96.34	96.63	108.27	151.65	105.87	184.51	108.75	99	124.34		0.335277	1.62016	0.0239793	1.65449
Kif5b	Kinesin-1 heavy chain OS=Mus musculus GN=Kif5b PE=1 SV=3	6.01	110293	374.93	Q61768	11	18.17	0	KINH_MOUSE	524.88	516.29	499.59	546.03	475.21	537.68	516.46	564.15	661.14	599.71	566.86	707.22	573.13	478.81	602.15	526.09	723.56	676.32	650.46	645.12	635.05	657.8	640.24	716.69	559.6	627.12		0.16398	1.64453	0.0226708	1.65269
Sirt2	NAD-dependent protein deacetylase sirtuin-2 OS=Mus musculus GN=Sirt2 PE=1 SV=2	5.06	43883.7	608.53	Q8VDQ8	7	28.28	0	SIR2_MOUSE	149.79	131.84	137.79	146.55	70.21	69.91	93.8	85.8	103.02	103.46	107.96	104.9	131.39	111.48	106.25	120.5	135.61	117.66	110.86	126.62	138.98	138.17	134.4	131.46	108.75	125.28		0.242151	1.61319	0.0243674	1.63126
Rps26	40S ribosomal protein S26 OS=Mus musculus GN=Rps26 PE=3 SV=3	11.42	13300.6	374.37	P62855	2	20.87	0	RS26_MOUSE	28.81	35.47	36.22	32.71	21.54	22.73	26.75	25.42	26.81	31.01	34.15	27.48	NA	NA	NA	33.15	38.29	29.75	35.86	30.91	29.73	34.75	29.74	37.14	29.09	33.26		0.205188	1.61454	0.0242921	1.62752
Pdia3	Protein disulfide-isomerase A3 OS=Mus musculus GN=Pdia3 PE=1 SV=2	5.81	57134.7	1461.19	P27773	21	52.67	0	PDIA3_MOUSE	304.38	295.15	292.68	268.38	342.92	354.37	382.18	399.7	382.42	385.86	364.92	380.3	299.15	257.36	246.88	295.01	525.05	466.73	529.14	584.28	498.46	538.68	515.15	563.74	346.11	443.3		0.302195	1.59799	0.0252355	1.62631
Gpd1	Glycerol-3-phosphate dehydrogenase [NAD(+)], cytoplasmic OS=Mus musculus GN=Gpd1 PE=1 SV=3	6.8	38200.1	979.29	P13707	13	53.58	0	GPDA_MOUSE	92.22	101.65	128.14	152.62	212.28	169.39	126.78	181.62	158.45	163.08	243.01	190.1	130.96	97.9	175.86	107.24	438.79	240.71	236.95	208.44	280.71	221.58	361.95	234.8	159.94	227.99		0.433465	1.56116	0.0274687	1.62022
Serpinf1	Pigment epithelium-derived factor OS=Mus musculus GN=Serpinf1 PE=1 SV=2	6.52	46291.2	2217.12	P97298	13	45.8	0	PEDF_MOUSE	757.01	253.21	519.77	761.22	758.8	1204.68	1050.26	1217.11	799.82	865.89	579.27	919.35	1119.62	1001.38	1468.5	751.94	1047.61	1450.96	1271.85	456.4	859.8	1113.17	995.46	1129.53	807.2	1055.52		0.430715	1.56116	0.0274687	1.61949
Prelp	Prolargin OS=Mus musculus GN=Prelp PE=1 SV=2	9.84	43634.8	2302.21	Q9JK53	12	35.98	0	PRELP_MOUSE	320.58	321.36	331.86	336.93	321.67	335.63	388.66	365.19	379.88	343.61	340.6	390.6	355.32	338.57	308.14	309.61	380.08	378.47	393.71	428.43	446.29	524.66	430.24	428.57	348.05	393.51		0.164311	1.60164	0.0250239	1.61005
Pfn1	Profilin-1 OS=Mus musculus GN=Pfn1 PE=1 SV=2	8.48	15128.3	9871.52	P62962	9	72.86	0	PROF1_MOUSE	296.22	284.09	291.19	293.7	275.57	295.41	300.61	323.17	248.04	235.84	220.92	265.79	469.48	425.91	462.84	490.59	256.47	260.12	255.83	270.39	273.02	294.14	288.55	305.93	277.55	337.77		0.243794	1.58278	0.0261349	1.60144
Acat1	Acetyl-CoA acetyltransferase, mitochondrial OS=Mus musculus GN=Acat1 PE=1 SV=1	8.65	45158.4	756.44	Q8QZT1	12	44.58	0	THIL_MOUSE	152.41	147.38	150.41	175.57	159.54	241.43	253	275.1	227.77	232.7	205.29	256.25	197.07	179.68	207.96	216.45	248.64	257.25	241.15	305.06	235.62	274.8	240.13	282.15	206.4	240.5		0.240961	1.58278	0.0261349	1.60102
Myl12b	Myosin regulatory light chain 12B OS=Mus musculus GN=Myl12b PE=1 SV=2	4.49	19836.2	1178.54	Q3THE2	6	44.19	0	ML12B_MOUSE	84.01	87.07	92.27	86.28	58.39	60.84	63.98	68.34	75.42	74	81.11	83.14	58.63	59.85	50.05	69.49	65.9	62.87	52.93	59.83	89.18	91.36	67.47	68.97	76.24	66.38		-0.207279	1.58278	0.0261349	1.59629
Nme2	Nucleoside diphosphate kinase B OS=Mus musculus GN=Nme2 PE=1 SV=1	7.37	17477.2	10358.9	Q01768	11	73.03	0	NDKB_MOUSE	1218.26	1220.92	1188.87	1281.92	1001.94	1010.02	1032.15	1107.76	976.83	977.14	927.35	997.33	1191.08	1015.71	1005.14	1051.61	1418.25	1257.34	1240.81	1262.45	1356.61	1421.61	1080.7	1121.25	1078.37	1201.88		0.15417	1.56206	0.0274117	1.56965
Hsd17b10	3-hydroxyacyl-CoA dehydrogenase type-2 OS=Mus musculus GN=Hsd17b10 PE=1 SV=4	8.78	27532.7	402.44	O08756	2	12.26	0	HCD2_MOUSE	124.54	101.04	73.68	81.81	79.65	136.91	96.07	245.76	107.46	119.09	82.29	105.42	103.9	187.14	151.82	188.05	88.61	111.56	135.66	202	99.92	132.28	113.25	164.68	112.81	139.91		0.34131	1.52804	0.0296457	1.56569
Ndufa13	NADH dehydrogenase [ubiquinone] 1 alpha subcomplex subunit 13 OS=Mus musculus GN=Ndufa13 PE=1 SV=3	9.79	16859.7	436.49	Q9ERS2	2	13.89	0	NDUAD_MOUSE	60.29	60.74	51.86	49.96	47.89	42.41	51.53	48.24	53.73	55.88	60.54	58.46	55.47	NA	41.88	55.15	73.94	51.95	60.89	70.99	66.86	65.89	63.29	62.99	53.46	60.85		0.178551	1.55514	0.0278523	1.56536
Myl6	Myosin light polypeptide 6 OS=Mus musculus GN=Myl6 PE=1 SV=3	4.36	17101.2	1331.71	Q60605	6	50.99	0	MYL6_MOUSE	48.35	55.79	104.52	112.84	40.81	52.71	57.26	64.73	38.05	52.69	34.45	43.73	78.16	65.47	49.92	63.74	116.67	117.23	60.91	56.02	120.84	134.12	43.21	48.88	58.83	79.6		0.423789	1.50369	0.0313555	1.56226
Ckmt1	Creatine kinase U-type, mitochondrial OS=Mus musculus GN=Ckmt1 PE=1 SV=1	8.16	47403	658.44	P30275	9	39.71	0	KCRU_MOUSE	245.89	237.61	311.22	390.7	297.69	204.59	255.26	208.9	222.47	171.37	275.72	318.05	151.38	135.11	166.35	167.38	322.47	178.62	241.55	243.51	281.96	227.11	262.97	219.17	261.62	216.47		-0.286439	1.52831	0.0296273	1.55492
Flnb	Filamin-B OS=Mus musculus GN=Flnb PE=1 SV=3	5.34	280277	1096.42	Q80X90	84	50.35	0	FLNB_MOUSE	4106.42	4424.54	3260.01	3111.55	2744.82	2879.76	3483.57	3436.39	3785.1	3653.2	3512.55	4073.61	5190.86	5295.3	5254.3	5139.35	3986.66	4073.87	3185.92	3749.35	3357.86	3294.79	3290.07	3749.01	3539.29	4130.61		0.209142	1.53176	0.0293931	1.54597
Actn4	Alpha-actinin-4 OS=Mus musculus GN=Actn4 PE=1 SV=1	5.09	105434	1049.72	P57780	26	39.58	0	ACTN4_MOUSE	1295.56	1215.92	1154.68	1288.33	1144.21	507.7	1411.09	1463.58	1069.48	1119.54	1029.1	1130.09	1915.78	1409.18	2197.72	548.62	1477.6	1477.78	1376.27	1565.42	1505.3	1577.04	1363.95	1315.12	1152.44	1477.48		0.338164	1.50393	0.031338	1.54148
Ndrg1	Protein NDRG1 OS=Mus musculus GN=Ndrg1 PE=1 SV=1	5.65	43465	9803.06	Q62433	13	60.15	0	NDRG1_MOUSE	1977.73	1593.4	1627.62	1846.55	556.48	681.28	733.19	755.22	1023.08	1068.69	898.48	1111.51	783.89	476.75	656.52	560	817.23	884.89	866.23	689	1190.5	1259.53	966.07	966.89	1156.1	843.12		-0.392337	1.48576	0.0326768	1.53669
Bcas1	Breast carcinoma-amplified sequence 1 homolog OS=Mus musculus GN=Bcas1 PE=2 SV=3	5.82	67833.8	1286.73	Q80YN3	8	15.32	0	BCAS1_MOUSE	1225.65	1196.64	1063.61	1188.79	1028.01	1200.41	1223.27	1291.13	1293.07	1138.92	1209.63	1100.8	1411.64	1193.34	1304.08	1237.64	1303.12	1239.59	1249.41	1235.6	1124.68	1201.2	1287.69	1593.37	1180	1281.78		0.117234	1.50393	0.031338	1.50849
Aldh6a1	Methylmalonate-semialdehyde dehydrogenase [acylating], mitochondrial OS=Mus musculus GN=Aldh6a1 PE=1 SV=1	8.06	58372	390.59	Q9EQ20	6	16.82	0	MMSA_MOUSE	164.15	162.82	134.16	135.53	239.25	242.49	266.32	253.42	213.93	200.66	204.09	215.21	NA	NA	NA	NA	152.96	138.68	164.63	172.27	171.58	182.67	180.79	175.98	202.67	167.45		-0.245737	1.47578	0.0334362	1.4961
Ctnna1	Catenin alpha-1 OS=Mus musculus GN=Ctnna1 PE=1 SV=1	5.83	100791	222.15	P26231	3	4.53	0	CTNA1_MOUSE	202.59	251.19	NA	185.48	160.62	186.38	NA	166.78	187.76	194.41	193.73	239.15	NA	NA	NA	NA	268.24	NA	178.97	301.31	234.64	172.94	260.6	225.27	196.81	234.57		0.24026	1.47563	0.0334476	1.49507
Cers2	Ceramide synthase 2 OS=Mus musculus GN=Cers2 PE=1 SV=1	8.95	45195.5	293.91	Q924Z4	2	9.47	0	CERS2_MOUSE	143.75	130.77	104.06	149.05	82.17	61.9	108.49	79.43	120.32	142.35	121.72	134.34	106.53	110.22	129.7	114.18	119.43	105.4	130.58	139.29	158.35	172.36	168.82	165.19	114.86	135		0.256813	1.448	0.0356447	1.4706
Rpl30	60S ribosomal protein L30 OS=Mus musculus GN=Rpl30 PE=3 SV=2	9.95	12955.2	1618.23	P62889	2	30.43	0	RL30_MOUSE	31.15	34.85	29.42	27.25	22.97	23.39	27.91	25.49	42.83	34.66	37.21	41.81	NA	31.41	32.58	35.73	32.14	28.75	33.74	32.7	37.32	48.61	40.49	49.55	31.58	36.64		0.222702	1.44803	0.0356427	1.46505
Ldha	L-lactate dehydrogenase A chain OS=Mus musculus GN=Ldha PE=1 SV=3	7.67	36840.8	3749.82	P06151	14	55.12	0	LDHA_MOUSE	286.76	273.57	352.44	262.39	267.98	281.77	313.03	304.82	401.7	371.34	469.15	416.13	361.34	316.31	305.49	329.25	590.65	387.52	401.81	465.94	371.37	355.19	358.87	368.93	333.42	384.39		0.208234	1.44287	0.0360685	1.45782
Ppia	Peptidyl-prolyl cis-trans isomerase A OS=Mus musculus GN=Ppia PE=1 SV=2	8	18142.5	22129.9	P17742	9	64.63	0	PPIA_MOUSE	1451.43	1476.91	1648.21	1656.03	1294.25	1429.85	1598.26	1820.75	1517.96	1339.43	1348.78	1549.13	2002.67	1659.11	1784.95	1974.91	1741.6	1644.14	1509.92	1704.27	1483.96	1494.6	1372.15	1566.08	1510.92	1661.53		0.134968	1.44589	0.0358186	1.45218
Islr	Immunoglobulin superfamily containing leucine-rich repeat protein OS=Mus musculus GN=Islr PE=1 SV=1	5.03	46356.4	290.83	Q6GU68	2	6.07	0	ISLR_MOUSE	102.09	97.71	97.43	100.53	71.88	NA	NA	84.69	109.92	96.35	96.28	121.82	NA	NA	NA	NA	NA	NA	NA	NA	77.59	78.44	NA	NA	97.87	78.01		-0.314526	1.4084	0.0390478	1.4431
Stx1b	Syntaxin-1B OS=Mus musculus GN=Stx1b PE=1 SV=1	5.09	33472.9	356.88	P61264	4	15.97	0	STX1B_MOUSE	96.69	85.05	73.04	84.86	53.96	59.76	57.76	57.3	76.12	62.1	75.44	65.79	NA	NA	NA	NA	NA	NA	NA	NA	59.85	55.57	47.63	68.02	70.66	57.77		-0.279228	1.40198	0.0396299	1.42951
Park7	Protein deglycase DJ-1 OS=Mus musculus GN=Park7 PE=1 SV=1	6.36	20249.5	1967.85	Q99LX0	7	58.73	0	PARK7_MOUSE	97.76	107.56	102.76	97.98	100.05	108.16	111.41	115.25	83.12	72.39	80.24	86.26	103.05	100.83	84.7	139.05	81.88	72.51	75.22	87.28	74.52	68.05	64.4	73.61	96.91	85.43		-0.201466	1.41476	0.0384808	1.42903
Ube2l3	Ubiquitin-conjugating enzyme E2 L3 OS=Mus musculus GN=Ube2l3 PE=2 SV=1	8.8	18032.7	1568.4	P68037	5	56.49	0	UB2L3_MOUSE	73.64	55.36	94.49	106.03	74.56	82.59	92.55	92.87	43.31	48.68	52.67	60.73	157.61	152.94	129.58	110.25	131.48	126.87	85.98	91.67	68.59	84.92	37.06	40.67	73.12	101.47		0.397413	1.36419	0.0432326	1.4209
Slc44a1	Choline transporter-like protein 1 OS=Mus musculus GN=Slc44a1 PE=1 SV=3	8.72	74606.9	1779.33	Q6X893	14	24.04	0	CTL1_MOUSE	694.09	526.84	707.49	659.99	603.07	744.09	759.4	815.04	876.19	837.03	735.84	922.09	1008.24	821.75	803.52	653.21	820.28	926.43	887.56	949.41	707.15	785.08	763.92	764.2	740.1	824.23		0.161271	1.40198	0.0396299	1.41122
Cyb5a	Cytochrome b5 OS=Mus musculus GN=Cyb5a PE=1 SV=2	4.76	15241	2151.23	P56395	4	41.04	0	CYB5_MOUSE	123.38	117.26	113.92	114.99	76.29	71.44	88.86	85.64	109.04	110.07	103.82	115.35	107.18	109.29	101.66	109.48	110.4	103.71	101.88	103.95	126.12	138.39	125.1	131.72	102.5	114.07		0.167392	1.39782	0.0400108	1.40781
Mgll	Monoglyceride lipase OS=Mus musculus GN=Mgll PE=1 SV=1	6.72	33729.7	814.68	O35678	8	34.65	0	MGLL_MOUSE	563.67	570.67	448.99	514.66	1793.65	1842.04	602.22	584.96	419.8	416.15	398.76	433.02	1255.47	1076.75	1101.83	1304.65	605.56	612.79	494.19	688.94	766.38	724.81	765.04	847.92	715.71	853.69		0.423597	1.34006	0.0457022	1.40542
Atp5f1	ATP synthase F(0) complex subunit B1, mitochondrial OS=Mus musculus GN=Atp5f1 PE=1 SV=1	9.39	29062.9	1415.57	Q9CQQ7	4	16.02	0	AT5F1_MOUSE	271.17	170.63	318.02	317.54	371.81	328.64	349.74	174.88	313.95	276.71	388.47	404.23	222.72	109.73	126.4	152.45	492.05	293.4	340.04	190.46	425.9	265.64	254.25	159.65	307.15	252.72		-0.37985	1.34006	0.0457022	1.39286
Rab35	Ras-related protein Rab-35 OS=Mus musculus GN=Rab35 PE=1 SV=1	8.39	23310.4	1110.94	Q6PHN9	3	17.41	0	RAB35_MOUSE	16.64	32.26	NA	NA	NA	31.24	NA	39.32	50.54	36.57	45.23	46.83	NA	NA	NA	NA	NA	NA	NA	40.57	47.42	45.5	48.54	52.01	37.33	46.81		0.389965	1.33488	0.046251	1.39067
Gnb1	Guanine nucleotide-binding protein G(I)/G(S)/G(T) subunit beta-1 OS=Mus musculus GN=Gnb1 PE=1 SV=3	5.54	38175.4	3700.42	P62874	11	59.12	0	GBB1_MOUSE	610.92	585.73	505.02	531.48	1070.24	1179.4	466.48	532.66	591.37	566.32	579.7	612.84	532.29	527.89	492.47	533.1	486.74	488.75	499.29	587.63	546.91	606.78	591.64	573.99	652.68	538.96		-0.2189	1.37165	0.0424963	1.38901
Actr1a	Alpha-centractin OS=Mus musculus GN=Actr1a PE=2 SV=1	6.18	42727.9	775.54	P61164	6	29.26	0	ACTZ_MOUSE	131.3	133.02	139.38	145.12	123.98	133.24	139.06	148.12	154.16	143.27	152.76	168.28	135.55	135.94	137.25	139.94	156.28	145.05	150.79	151.08	172.04	180.94	179.01	189.54	142.64	156.12		0.125005	1.37165	0.0424963	1.37733
Rpl3	60S ribosomal protein L3 OS=Mus musculus GN=Rpl3 PE=1 SV=3	10.65	46395.1	658.23	P27659	6	20.84	0	RL3_MOUSE	142.19	99.98	126.69	146.48	94.93	96.42	118.31	111.45	173.5	154.29	174.71	188.52	138.02	103.21	137.66	112.42	163.26	138.32	163.13	166.62	217.89	215.33	216.62	159.02	135.62	160.96		0.246804	1.35404	0.0442543	1.37635
Tufm	Elongation factor Tu, mitochondrial OS=Mus musculus GN=Tufm PE=1 SV=1	7.32	49907.6	262.35	Q8BFR5	4	12.17	0	EFTU_MOUSE	96.1	84.45	81.86	89.28	73.38	73.69	84.23	85.67	97.66	96.7	95.42	95.81	NA	NA	NA	NA	108.14	NA	93.85	104.95	82.69	96.14	92.22	100.54	87.85	96.93		0.143741	1.36119	0.0435317	1.36876
Rab7a	Ras-related protein Rab-7a OS=Mus musculus GN=Rab7a PE=1 SV=2	6.57	23774.9	4324.69	P51150	11	63.29	0	RAB7A_MOUSE	178.82	188.16	168.85	176.5	131.22	131.37	151.58	146.25	212.03	205.11	206.05	202.87	170.51	142.34	158.5	162.67	149.33	134.28	148.6	160.59	154.62	156.56	167.89	167.54	174.9	156.12		-0.147715	1.35912	0.0437399	1.36713
Eno3	Beta-enolase OS=Mus musculus GN=Eno3 PE=1 SV=3	6.81	47367.1	15664.3	P21550	16	53.69	0	ENOB_MOUSE	736.07	741.54	561.56	608.15	742.09	902.52	893.45	1060.39	1573.77	1568.08	1238.79	1513.12	734.62	851.64	765.67	854.75	1892.47	2085.81	2194.61	2873.61	898.9	1068.66	1129.89	1325.84	1011.63	1389.71		0.395386	1.29824	0.0503219	1.35712
Itgb4	Integrin beta-4 OS=Mus musculus GN=Itgb4 PE=2 SV=1	5.49	205472	344.13	A2A863	20	15.13	0	ITB4_MOUSE	1124.2	1135.04	899.49	935.5	748.71	871.3	1204.37	1232.72	1093.72	1216.78	1106.29	1312.82	1904.83	1185.16	1955.92	2099.2	1014.71	899.25	1008.46	1160.97	1105.29	1103.23	1083.38	1103.68	1073.41	1302.01		0.237051	1.33488	0.046251	1.35576
Acat2	Acetyl-CoA acetyltransferase, cytosolic OS=Mus musculus GN=Acat2 PE=1 SV=2	7.24	41754.1	691.74	Q8CAY6	11	57.18	0	THIC_MOUSE	177.39	186.06	239.34	237.01	307.41	300.42	346.27	265.11	247.17	213.79	291.21	288.78	371.48	296.98	375.31	374.77	283.54	308.63	259.48	300.73	264.31	256.52	222.27	227.17	258.33	295.1		0.196882	1.32789	0.0470018	1.3424
Echs1	Enoyl-CoA hydratase, mitochondrial OS=Mus musculus GN=Echs1 PE=1 SV=1	8.58	31873.6	700.48	Q8BH95	4	18.62	0	ECHM_MOUSE	88.43	81.68	72.77	76.42	93.71	87.29	105.98	112.84	96.96	109.72	93.04	112.1	107.92	81.97	94.85	94.06	121.8	98.03	93.18	130.92	106.09	108.87	102.02	109.37	94.24	104.09		0.14706	1.32436	0.0473847	1.3325
Rab14	Ras-related protein Rab-14 OS=Mus musculus GN=Rab14 PE=1 SV=3	5.8	24125.1	1692.75	Q91V41	7	46.98	0	RAB14_MOUSE	108.09	110.59	101.9	96.7	65.59	59.21	94.13	77.4	95.47	98.52	96.36	106.79	150.61	134.96	84.72	113.18	93.28	101.07	82.93	92.17	91.49	106.79	108.01	106.97	92.56	105.52		0.191436	1.31749	0.0481404	1.33133
Eci1	Enoyl-CoA delta isomerase 1, mitochondrial OS=Mus musculus GN=Eci1 PE=1 SV=2	9.26	32535.7	431.15	P42125	2	10.03	0	ECI1_MOUSE	62.06	71.8	91.54	75.99	100.52	113.6	109.79	125	102.53	83.77	82.55	97.41	81.17	91.7	NA	96.23	115.73	102.54	100.22	130.28	110.95	104.01	101.47	110.23	93.05	104.05		0.178445	1.30748	0.0492628	1.3196
Cd151	CD151 antigen OS=Mus musculus GN=Cd151 PE=2 SV=2	7.3	29101.5	401.05	O35566	2	9.88	0	CD151_MOUSE	308.45	291.81	245.71	233.19	293.62	247.52	278.4	423.12	272.29	240.89	355.21	302.03	317.88	384.35	321.32	411.86	301.15	280.97	305.98	336.54	323.08	325.51	261.31	293.77	291.02	321.98		0.156008	1.30714	0.049302	1.31641
Gpi	Glucose-6-phosphate isomerase OS=Mus musculus GN=Gpi PE=1 SV=4	8.2	62995.2	1032.64	P06745	17	38.53	0	G6PI_MOUSE	340.78	226.98	368.1	424.29	763.48	796.35	868.7	677.38	740.24	746.6	715.35	982.51	659.95	500.47	610.31	479.42	1152.65	1169.08	1216.18	800.47	841.62	774.42	844.31	490.89	637.56	794.98		0.362536	1.24935	0.0563188	1.30088
Sec22b	Vesicle-trafficking protein SEC22b OS=Mus musculus GN=Sec22b PE=1 SV=3	8.73	24911.7	310.93	O08547	2	10.23	0	SC22B_MOUSE	62.99	53.59	63.25	60.4	47.51	40.84	43.14	43.33	64.78	56.13	62.02	60.5	NA	NA	NA	NA	51.64	45.49	52.63	62.86	77.54	73.09	70.69	72.67	54.87	63.33		0.201252	1.28154	0.0522954	1.29724
Crmp1	Dihydropyrimidinase-related protein 1 OS=Mus musculus GN=Crmp1 PE=1 SV=1	6.78	62510	2969.41	P97427	12	40.73	0	DPYL1_MOUSE	1219.01	1283.39	1149.64	1021.45	1549.85	873.96	1395.77	1363.72	1322.45	1349.69	1332.74	1351.01	1245.49	1007.82	987.83	1104.15	1275.82	1344.1	1105.07	1147.01	1232.78	907.8	953.03	1378.52	1267.72	1140.79		-0.149895	1.28458	0.0519305	1.29329
Dctn1	Dynactin subunit 1 OS=Mus musculus GN=Dctn1 PE=1 SV=3	5.55	142360	169.64	O08788	3	2.89	0	DCTN1_MOUSE	192.63	191.49	193.69	178.4	NA	NA	NA	NA	234.6	209.27	194.56	221.82	NA	NA	NA	NA	NA	NA	NA	248.3	212.68	233.6	214.62	216.66	202.06	225.17		0.158763	1.27583	0.0529876	1.28567
Ckb	Creatine kinase B-type OS=Mus musculus GN=Ckb PE=1 SV=1	5.29	42998.5	1579.74	Q04447	12	52.23	0	KCRB_MOUSE	3828.21	3167.57	5150.92	4851.95	4086.69	4414.76	5178.45	5274.13	2064.67	1740.86	2005.86	1912.78	2788.89	2526.83	2606.45	3012.48	6465.23	4068.02	6109.34	5066.47	6793.54	6200.54	5326.68	4146.74	3639.74	4592.6		0.362257	1.23256	0.0585378	1.2847
Pabpc1	Polyadenylate-binding protein 1 OS=Mus musculus GN=Pabpc1 PE=1 SV=2	9.81	70899.1	198.75	P29341	4	7.08	0	PABP1_MOUSE	147.37	154.74	166.04	155.08	482.15	482.34	143.7	181.46	140.87	142.57	127.87	174.33	NA	NA	NA	NA	131.62	129.65	154.11	152.24	143.46	157	134.33	154.48	208.21	144.61		-0.35831	1.23256	0.0585378	1.28359
Kpnb1	Importin subunit beta-1 OS=Mus musculus GN=Kpnb1 PE=1 SV=2	4.49	98438.9	192.1	P70168	4	6.74	0	IMB1_MOUSE	355.11	320.06	368.53	428.44	213.79	167.96	177.74	192.9	355.88	352.43	352.7	408.94	NA	NA	NA	216.01	217.58	224.51	180.57	241.19	283.18	259.17	309.65	269.68	307.87	244.62		-0.277411	1.24351	0.057081	1.27408
Anp32b	Acidic leucine-rich nuclear phosphoprotein 32 family member B OS=Mus musculus GN=Anp32b PE=1 SV=1	3.68	31249.9	554.98	Q9EST5	3	14.71	0	AN32B_MOUSE	39.05	44.6	NA	NA	NA	NA	NA	NA	46.3	43.95	45.85	51.38	NA	NA	NA	NA	NA	NA	NA	NA	46.16	51.51	51.56	57.5	45.19	51.68		0.194099	1.24935	0.0563188	1.26433
Rps13	40S ribosomal protein S13 OS=Mus musculus GN=Rps13 PE=1 SV=2	10.94	17222.3	968.15	P62301	3	24.5	0	RS13_MOUSE	63.09	63.18	50.53	54.65	39.46	44.65	44.6	46.39	66	66.22	61.95	66.99	54.75	48.71	50.86	57.09	66.47	62.66	61.65	66.05	60.15	63.49	68.01	81	55.64	61.74		0.160382	1.24902	0.0563611	1.25928
Dync1h1	Cytoplasmic dynein 1 heavy chain 1 OS=Mus musculus GN=Dync1h1 PE=1 SV=2	5.98	534784	699.79	Q9JHU4	119	34.99	0	DYHC1_MOUSE	4747.34	4837.16	4404.58	4448.97	3390.16	3644.74	3770.64	3946.22	4925.06	5034.39	4430.66	5533.75	4474.68	4428.02	4484.37	4383.76	4467.93	4267.62	4238	5230.15	5389.2	5434.05	5115.07	6418.6	4426.14	4860.95		0.13783	1.24351	0.057081	1.25112
Cox6c	Cytochrome c oxidase subunit 6C OS=Mus musculus GN=Cox6c PE=1 SV=3	10.5	8469.03	1452.05	Q9CPQ1	3	35.53	0	COX6C_MOUSE	28.84	27.61	26.15	25.49	24.12	22.24	26.54	33.85	26.92	26.45	29.63	27.03	30.26	25.84	24.68	24.64	34.7	30.65	31.88	33.62	27.87	27.59	26.95	35.85	27.07	29.54		0.122083	1.2427	0.057188	1.24868
Cpne3	Copine-3 OS=Mus musculus GN=Cpne3 PE=2 SV=2	5.41	60326.4	283.67	Q8BT60	3	8.26	0	CPNE3_MOUSE	134.85	148.89	136.04	137.95	177.03	120.28	134.58	130.51	114.72	99.61	138.42	129.94	94.83	90.57	NA	NA	158.27	80.95	120.63	142.67	130.69	104.42	163.26	106.57	133.57	119.29		-0.187801	1.23103	0.0587444	1.24528
Rab10	Ras-related protein Rab-10 OS=Mus musculus GN=Rab10 PE=1 SV=1	8.57	22769.1	2578.9	P61027	6	35.5	0	RAB10_MOUSE	135.71	102.07	117.24	120.87	140.65	121.72	157.45	169.63	153.95	147.66	134.23	159.07	237.59	174.07	192.56	90	164.82	145.82	149	161.14	172.94	122.77	138.64	164.91	138.35	159.52		0.183694	1.22091	0.0601292	1.23466
Ddah2	N(G),N(G)-dimethylarginine dimethylaminohydrolase 2 OS=Mus musculus GN=Ddah2 PE=1 SV=1	5.59	29988	547.83	Q99LD8	3	15.44	0	DDAH2_MOUSE	81.18	84.71	84.93	75.92	71.33	76.85	75.58	90.01	75.25	77.67	70.25	75.21	84.31	72.03	94.01	85.28	88.72	68.74	74.92	96.68	88.47	86.78	83.58	84.93	78.24	84.04		0.0998964	1.22937	0.0589695	1.23342
Ndufv1	NADH dehydrogenase [ubiquinone] flavoprotein 1, mitochondrial OS=Mus musculus GN=Ndufv1 PE=1 SV=1	8.15	51518.6	610.18	Q91YT0	9	27.8	0	NDUV1_MOUSE	158.05	144.28	129.35	134.29	108.46	124.92	121.37	140.09	152.11	140.95	128.06	132.82	NA	NA	140.43	123.15	151.6	149.74	161.76	210.85	139.06	152.97	123.65	132.41	134.56	148.56		0.132963	1.20127	0.0629114	1.20861
Cadm3	Cell adhesion molecule 3 OS=Mus musculus GN=Cadm3 PE=1 SV=1	5.4	43363.6	1218.22	Q99N28	6	28.79	0	CADM3_MOUSE	338.65	320.01	350.44	307.05	195.94	197.26	255.93	253.2	278.96	284.78	240.09	255.62	240.09	219.84	205.42	233.8	240.19	244.06	245.77	256.93	243.67	266.31	265.9	278.74	273.16	245.06		-0.138146	1.19787	0.0634055	1.20581
Flot2	Flotillin-2 OS=Mus musculus GN=Flot2 PE=1 SV=2	4.94	47437.3	296.46	Q60634	2	9.11	0	FLOT2_MOUSE	NA	NA	63.71	NA	NA	NA	NA	NA	70.63	69.86	66.06	67.87	NA	NA	NA	NA	NA	NA	NA	NA	NA	NA	76.35	82.21	67.63	79.28		0.229407	1.17365	0.0670417	1.19587
Canx	Calnexin OS=Mus musculus GN=Canx PE=1 SV=1	4.29	67677.2	1186.68	P35564	15	29.1	0	CALX_MOUSE	816.37	876.59	804.15	794.03	476.15	508.58	597.47	546.79	773.04	736.68	730.84	862.84	732.33	708.66	634.15	636.79	759.34	716.84	678.59	738.99	989.31	1037.59	940.7	1027.92	710.29	800.1		0.177412	1.18201	0.0657639	1.19525
Tagln	Transgelin OS=Mus musculus GN=Tagln PE=1 SV=3	9.22	22632.9	5227.88	P37804	15	76.12	0	TAGL_MOUSE	235.78	223.3	227.07	219.84	299.47	293.42	325.63	321.88	157.14	153.04	161.3	173.65	257.31	212.16	211.73	234.49	260.07	230.67	241.46	256.95	307.41	330.03	278.53	287.84	232.63	259.05		0.19427	1.17785	0.0663969	1.19377
Thy1	Thy-1 membrane glycoprotein OS=Mus musculus GN=Thy1 PE=1 SV=1	9.27	18308.1	849.75	P01831	3	24.07	0	THY1_MOUSE	164.03	171.89	142.07	155.32	110.11	109.95	106.89	118.82	139.12	129.62	130.69	136.68	106.26	124.37	99.53	107.96	116.25	92.74	111.38	121.31	136.05	138.31	148.64	158.06	134.6	121.74		-0.14605	1.17746	0.0664564	1.18649
Cpne6	Copine-6 OS=Mus musculus GN=Cpne6 PE=2 SV=1	5.23	62636.4	118.78	Q9Z140	2	3.59	0	CPNE6_MOUSE	109.26	115.64	105.76	113.39	71.39	79.34	68.9	92.79	82.75	74.84	85.11	88.56	64.5	61.6	NA	NA	79.23	55.07	82.05	97.05	86.86	91.9	102.25	82.91	90.64	80.34		-0.178256	1.17267	0.0671943	1.18614
Cfl2	Cofilin-2 OS=Mus musculus GN=Cfl2 PE=1 SV=1	8.16	18823.7	3148	P45591	9	66.27	0	COF2_MOUSE	88.76	80.58	86.76	80.4	74.35	64.26	79.34	74.43	71.35	67.01	69.85	69.32	80.66	56.66	65.89	71.87	74.79	59.19	70.12	69.52	75.93	76.42	70.26	72.74	75.53	70.34		-0.102867	1.16992	0.0676215	1.17443
Slc25a4	ADP/ATP translocase 1 OS=Mus musculus GN=Slc25a4 PE=1 SV=4	10.02	33132.4	5397.46	P48962	16	54.36	0	ADT1_MOUSE	1082.3	1196.06	1073.92	961.32	1181.44	1222.79	1658.37	1517.5	772.87	808.33	771.01	911.01	988.53	921.63	890.85	952	1561.74	1513.89	1433.18	1431.45	1315.16	1272.42	1252.91	1339.49	1096.41	1239.44		0.191964	1.14397	0.071784	1.15997
Ndufs3	NADH dehydrogenase [ubiquinone] iron-sulfur protein 3, mitochondrial OS=Mus musculus GN=Ndufs3 PE=1 SV=2	6.77	30320.4	599.24	Q9DCT2	5	23.95	0	NDUS3_MOUSE	90.75	83.07	77.33	78.12	62.7	104.85	77.2	82.84	97.4	90.76	91.93	86.69	NA	NA	71.76	75.79	106.66	88.18	95.54	107.64	95.06	99.83	94.61	96.71	85.3	93.18		0.127799	1.139	0.0726101	1.14615
Atp5j2	ATP synthase subunit f, mitochondrial OS=Mus musculus GN=Atp5j2 PE=1 SV=3	10.23	10401.3	3054.33	P56135	2	26.14	0	ATPK_MOUSE	77.64	83.59	62.21	62.95	64.27	67.99	63.48	73.18	82.88	77.67	78	79.52	65.4	62.81	64.48	71.54	114.19	71.95	74.07	94.61	106.71	127.52	79.05	67.45	72.78	83.32		0.161843	1.13385	0.0734774	1.14534
Col15a1	Collagen alpha-1(XV) chain OS=Mus musculus GN=Col15a1 PE=1 SV=2	4.6	140929	167.23	O35206	5	4.39	0	COFA1_MOUSE	558.85	553.68	528.8	496.97	408.39	359.97	498.32	514.8	563.68	527.28	397.32	578	587.69	543.8	568.66	598.92	547.66	462.57	496.36	593.74	551.25	618.65	484.86	429.51	498.84	540.31		0.121933	1.13116	0.0739331	1.13771
Hsp90aa1	Heat shock protein HSP 90-alpha OS=Mus musculus GN=Hsp90aa1 PE=1 SV=4	4.74	85187.2	1517.71	P07901	14	22.24	0	HS90A_MOUSE	428.1	436.34	382.43	424.07	171.54	187.6	163.82	179.79	282.15	281.23	296.08	339.47	178.71	188.6	167.79	229.53	228.55	230.36	216.64	252.85	279.77	281.13	299.83	340.73	297.72	241.21		-0.244041	1.10876	0.077846	1.1353
Gsn	Gelsolin OS=Mus musculus GN=Gsn PE=1 SV=3	5.76	86340.9	1466.64	P13020	23	43.46	0	GELS_MOUSE	1719.48	1583.86	1609.42	1700.21	1037.79	1114.84	1526.2	1482.81	1131.56	1048.27	991.72	1078.68	1180.96	1097.49	1073.09	1232.37	1142.58	1083.36	1174.43	1182.07	1199.79	1173.94	1295.51	1437.09	1335.4	1189.39		-0.140052	1.11441	0.0768408	1.12317
Marc2	Mitochondrial amidoxime reducing component 2 OS=Mus musculus GN=Marc2 PE=1 SV=1	8.73	38821.7	475.8	Q922Q1	4	12.43	0	MARC2_MOUSE	96.36	87.5	91.82	85.13	59.99	66.91	102.83	75.07	111.52	95.4	106.94	104.56	113.14	84.8	83.99	94.42	110.4	123.2	101.37	106.16	91.46	94.42	86.45	91.28	90.34	98.42		0.136947	1.10876	0.077846	1.11719
Hspa9	Stress-70 protein, mitochondrial OS=Mus musculus GN=Hspa9 PE=1 SV=3	5.7	73746.5	253.75	P38647	5	8.69	0	GRP75_MOUSE	223.53	223.27	194.62	205.62	208.23	228.52	252.37	251.39	234.5	216.13	233.69	254.79	179.91	NA	170.24	172.62	250.3	223.73	221.19	239.77	232.83	228.27	194.19	220.77	227.22	212.17		-0.106105	1.10876	0.077846	1.11383
Atp1b3	Sodium/potassium-transporting ATPase subunit beta-3 OS=Mus musculus GN=Atp1b3 PE=1 SV=1	8.63	32117.9	1106.43	P97370	5	22.3	0	AT1B3_MOUSE	246.9	278.25	220.12	194.89	141.68	139.32	195.26	186.08	238.92	246.96	213.32	283.23	188.64	177.19	192.06	227.35	181.4	141.18	168.4	188.95	215.65	178.16	205.31	222.21	215.41	190.54		-0.154484	1.10215	0.0790405	1.11292
Gng2	Guanine nucleotide-binding protein G(I)/G(S)/G(O) subunit gamma-2 OS=Mus musculus GN=Gng2 PE=2 SV=2	8.25	7964.22	5098.21	P63213	4	52.11	0	GBG2_MOUSE	67.18	65.14	64.88	59.62	53.08	51.67	57.33	61.03	70.64	65.82	64.25	71.87	74.34	66.72	62.51	70.01	63.21	63.82	60.43	64.69	64	70.03	66.27	70.18	62.71	66.35		0.0860657	1.10876	0.077846	1.1121
Lum	Lumican OS=Mus musculus GN=Lum PE=1 SV=2	5.98	38664.2	2218.66	P51885	9	32.54	0	LUM_MOUSE	636.22	489.46	503.25	584.71	141.15	167.79	147.63	195.89	205.06	227.91	186.29	240.85	353.26	328.72	464.22	319.16	284.1	292.86	285.01	318.97	310.47	352.87	340.07	341.48	310.52	332.6		0.304427	1.06781	0.0855444	1.11036
Cox7a2	Cytochrome c oxidase subunit 7A2, mitochondrial OS=Mus musculus GN=Cox7a2 PE=1 SV=2	10.66	9290.91	813.12	P48771	2	27.71	0	CX7A2_MOUSE	24.85	26.34	42.81	41.22	22.75	26.05	30.48	32.31	21.98	23.16	25.92	26.55	NA	48	31.74	24.67	49.98	48.03	31.55	34.64	38.38	40.93	16.61	19.66	28.7	34.93		0.235122	1.0791	0.0833499	1.10441
Rps7	40S ribosomal protein S7 OS=Mus musculus GN=Rps7 PE=2 SV=1	10.58	22126.9	642.52	P62082	3	32.99	0	RS7_MOUSE	49.56	38.39	53.7	66.82	48.88	73.82	63.14	57.97	71.27	66.81	72.3	92.15	NA	NA	NA	NA	67.82	72.6	71.87	50.27	90.91	79.77	77.22	57.13	62.9	70.95		0.187237	1.06276	0.086544	1.07913
Immt	MICOS complex subunit Mic60 OS=Mus musculus GN=Immt PE=1 SV=1	6.16	84299.4	371.02	Q8CAQ8	13	20.21	0	MIC60_MOUSE	265.55	262.05	264.51	274.67	171.99	193.99	223.75	251.82	286.91	262.57	273.43	281.06	201.8	196.28	212.36	228.8	341.91	292.55	313.02	352.08	309.92	293.63	322.16	302.12	251.03	280.55		0.147659	1.06781	0.0855444	1.07797
Pcbp1	Poly(rC)-binding protein 1 OS=Mus musculus GN=Pcbp1 PE=1 SV=1	6.71	38011.2	417.41	P60335	4	16.85	0	PCBP1_MOUSE	132.02	137.5	123.73	129.85	119	118.17	150.87	161.78	97.03	114.99	102.35	152.46	NA	NA	116.74	120.07	180.58	169.76	158.49	126.7	118.26	158.35	106.77	172.95	128.31	142.87		0.146294	1.06585	0.0859313	1.07584
Jam3	Junctional adhesion molecule C OS=Mus musculus GN=Jam3 PE=1 SV=2	6.64	35407.9	681.18	Q9D8B7	6	19.68	0	JAM3_MOUSE	85.19	75.33	86.51	80.89	99.18	108.91	113.94	106.4	106.55	100.14	92.69	118.53	113.01	96.69	86.23	118.95	90.22	82.85	77.48	96.17	71.82	87.52	70.31	88.89	97.85	90.01		-0.124263	1.06781	0.0855444	1.07501
Ddost	Dolichyl-diphosphooligosaccharide--protein glycosyltransferase 48 kDa subunit OS=Mus musculus GN=Ddost PE=1 SV=2	5.42	49256.1	377.21	O54734	4	14.06	0	OST48_MOUSE	205.62	153.03	225.28	213.96	123.71	135.2	176.8	158.25	203.19	207.85	200.09	226.31	284.62	147.09	139.72	NA	213.22	193.6	183.73	187.31	230.76	257.79	238.44	223.88	185.77	209.11		0.166028	1.05474	0.0881573	1.06773
Cd81	CD81 antigen OS=Mus musculus GN=Cd81 PE=1 SV=2	5.44	26498.9	11203.6	P35762	4	30.93	0	CD81_MOUSE	1463.48	1367.54	1370.43	1409.55	1517.04	1795.22	1449.96	1908.33	1939.73	1615.87	1778.64	1896.28	1957.63	1392.71	1428.7	1408.8	1685.51	1296	1361.12	1778.01	1306.96	1228.53	1488.03	1702.36	1626.01	1502.86		-0.115345	1.06093	0.0869091	1.06719
Ckm	Creatine kinase M-type OS=Mus musculus GN=Ckm PE=2 SV=1	6.62	43273.2	16653.4	P07310	17	68.77	0	KCRM_MOUSE	1212.1	1067.4	1073.98	1165.72	1537.63	1572.75	1780.93	1789.04	2615.71	2399.81	2303.94	2917.01	1407.37	1204.66	1328.55	1141.72	3678.59	3140.4	3513.87	4399.05	1769.43	2035.61	1814.16	1957.1	1786.33	2282.54		0.289957	1.02023	0.0954483	1.06064
Acadvl	Very long-chain specific acyl-CoA dehydrogenase, mitochondrial OS=Mus musculus GN=Acadvl PE=1 SV=3	8.97	71274.8	228.72	P50544	2	5.18	0	ACADV_MOUSE	157.92	147.48	158.74	158.31	217.91	223.38	240.19	242.33	219.64	205.18	194.06	233.01	NA	NA	NA	NA	238.4	238.14	258.35	287.26	168.22	264.7	170.1	178.64	199.85	225.48		0.167508	1.04087	0.0910181	1.05426
Fis1	Mitochondrial fission 1 protein OS=Mus musculus GN=Fis1 PE=1 SV=1	8.97	17065.7	445.72	Q9CQ92	2	15.79	0	FIS1_MOUSE	23.79	24.74	25.11	24.96	NA	NA	NA	30.1	25.63	26.68	23.94	22.69	NA	NA	NA	NA	NA	NA	NA	24.96	30.1	31.03	25.33	NA	25.29	27.85		0.136538	1.04537	0.0900805	1.05425
Usp5	Ubiquitin carboxyl-terminal hydrolase 5 OS=Mus musculus GN=Usp5 PE=1 SV=1	4.7	96745.9	238.07	P56399	5	11.89	0	UBP5_MOUSE	234.23	200.08	221.56	222.65	NA	NA	NA	NA	158.25	152.8	136.53	155.43	NA	NA	NA	NA	NA	NA	NA	NA	144.86	164.97	162.27	158.95	185.19	157.76		-0.205331	1.03026	0.0932687	1.05053
Ckap4	Cytoskeleton-associated protein 4 OS=Mus musculus GN=Ckap4 PE=1 SV=2	5.32	63749.2	466.34	Q8BMK4	12	25.57	0	CKAP4_MOUSE	313.74	273.66	300.32	288.17	185	202.64	218.56	237.87	344.41	407.83	316.81	363.69	181	180.35	171.14	213.27	258.72	229.78	298.81	339.61	277.9	326.95	265.92	305.84	287.73	254.11		-0.17847	1.03402	0.0924656	1.04931
Cltc	Clathrin heavy chain 1 OS=Mus musculus GN=Cltc PE=1 SV=3	5.35	193325	1346.1	Q68FD5	60	49.73	0	CLH1_MOUSE	2535.05	2764.51	2414.2	2554.74	5750.84	5838.26	1990.15	2213.91	2104.6	2354.93	2220.22	2404.74	2691.44	2599.37	2562.15	2792.07	2166.53	1887.81	1875.93	2441.02	2211.07	2558.14	2422.08	2565.01	2928.85	2397.72		-0.196741	1.02832	0.0936867	1.04697
Uqcrfs1	Cytochrome b-c1 complex subunit Rieske, mitochondrial OS=Mus musculus GN=Uqcrfs1 PE=1 SV=1	8.91	29652.8	347.18	Q9CR68	4	13.87	0	UCRI_MOUSE	75.15	87.21	95.08	91.96	83.81	85.71	102.88	105.14	101.61	95.09	89.64	90.09	NA	NA	79.01	NA	132.82	91.29	95.89	58.13	96.06	48.56	75.56	NA	91.95	84.67		-0.17409	1.03042	0.0932347	1.04503
Acaa2	3-ketoacyl-CoA thiolase, mitochondrial OS=Mus musculus GN=Acaa2 PE=1 SV=3	8.07	42286.2	1756.87	Q8BWT1	14	60.71	0	THIM_MOUSE	227.14	225.57	214.8	216.22	326.34	337.54	392.51	411.66	388.5	391.2	364.09	415.13	234.86	219.02	226.67	229.47	311.57	290.5	323.53	332.14	322.07	300.66	302.27	325.26	325.89	284.84		-0.164455	1.02832	0.0936867	1.04139
Casq1	Calsequestrin-1 OS=Mus musculus GN=Casq1 PE=1 SV=3	3.75	46378	207.46	O09165	2	9.63	0	CASQ1_MOUSE	NA	NA	NA	NA	NA	NA	NA	NA	203.17	203.76	156.69	181.96	NA	NA	NA	NA	310.26	319.79	392.47	476.05	126.51	153.3	164.11	195.85	186.39	267.29		0.381517	0.967191	0.107847	1.03972
Fhl1	Four and a half LIM domains protein 1 OS=Mus musculus GN=Fhl1 PE=1 SV=3	8.26	33827.7	664.45	P97447	7	28.57	0	FHL1_MOUSE	124.83	130.21	137.34	126.51	115.49	122.57	135.92	134.59	163.1	163.51	155.32	171.65	148.83	127.22	140.61	158.01	157.57	116.82	129.8	156.47	165.11	171.86	154.14	179.72	140.09	150.51		0.104121	1.03216	0.092863	1.0374
Aspn	Asporin OS=Mus musculus GN=Aspn PE=1 SV=1	8.71	42971.8	739.53	Q99MQ4	9	32.44	0	ASPN_MOUSE	186.45	177.59	165.3	192.85	153.62	166.74	165.47	169.77	180.39	187.59	174.75	206.47	126.23	166.95	112.98	129.49	184.37	178.45	150.69	204.94	176.09	191.41	165.03	203.11	177.25	165.81		-0.115808	1.03026	0.0932687	1.03675
Tppp3	Tubulin polymerization-promoting protein family member 3 OS=Mus musculus GN=Tppp3 PE=1 SV=1	9.52	19136.6	11539.7	Q9CRB6	11	52.27	0	TPPP3_MOUSE	645.71	683.51	697.9	664.59	654.31	604.39	733.42	718.13	472.82	493.58	510.78	603.88	885.5	734.23	755.7	757.92	709.48	566.82	678.34	707.5	532.38	540.93	581.23	678.49	623.58	677.38		0.117592	1.02731	0.0939049	1.03402
Eef2	Elongation factor 2 OS=Mus musculus GN=Eef2 PE=1 SV=2	6.39	96283.7	2009.39	P58252	34	49.65	0	EF2_MOUSE	815.47	889.2	1184.5	1326.58	1197.53	1250.07	1212.73	909.33	1210.85	1031.82	1167.42	1505.71	668.32	615.98	740.4	735.11	1288.91	1142.15	1008.05	1103.82	1363.38	1263.92	1122.96	1373.63	1141.77	1035.55		-0.173509	1.01776	0.0959926	1.03245
Otub1	Ubiquitin thioesterase OTUB1 OS=Mus musculus GN=Otub1 PE=1 SV=2	4.66	31498.2	621.43	Q7TQI3	8	34.32	0	OTUB1_MOUSE	122.22	111.69	105.99	102.49	44.82	45.58	NA	NA	88.05	77.52	83.26	88.77	NA	NA	NA	NA	NA	NA	74.47	NA	57.84	66.2	64.63	83.38	87.04	69.3		-0.269431	0.99426	0.10133	1.03012
Hpcal1	Hippocalcin-like protein 1 OS=Mus musculus GN=Hpcal1 PE=2 SV=2	5.16	22452.3	865.41	P62748	4	22.28	0	HPCL1_MOUSE	64.68	64.94	78.07	62.77	62.78	59.86	65.57	63.74	46.2	52.75	50	45.09	81.45	65.46	70.28	77.12	50.9	NA	39.08	41	40.79	42.14	44.49	47.34	59.7	54.55		-0.165388	1.01605	0.0963724	1.02942
Glud1	Glutamate dehydrogenase 1, mitochondrial OS=Mus musculus GN=Glud1 PE=1 SV=1	7.98	61679.1	538.8	P26443	9	21.33	0	DHE3_MOUSE	246.53	240.07	239.15	228.38	176.01	187.64	197.59	211.8	220.55	220.06	224.01	244.84	162.73	179.01	167.18	160.74	215.44	211.4	204.26	248.37	199.58	246.09	240.75	231.11	219.72	205.56		-0.105561	1.015	0.0966042	1.02048
Prdx5	Peroxiredoxin-5, mitochondrial OS=Mus musculus GN=Prdx5 PE=1 SV=2	9.13	22239.7	5814.19	P99029	10	56.67	0	PRDX5_MOUSE	296.18	260.69	258.88	304.14	283.67	375.88	325.74	393.77	222.32	260.95	203.09	276.26	420.14	391.96	461.6	438.9	267.15	288.23	277.92	277.7	254.12	297.37	222.46	292.84	288.46	324.2		0.154222	1.00829	0.0981099	1.02001
Sept8	Septin-8 OS=Mus musculus GN=Sept8 PE=1 SV=4	5.6	50154.6	556.56	Q8CHH9	8	29.37	0	SEPT8_MOUSE	146	115.42	137	130.7	115.71	111.66	118.52	132.08	143.95	142.56	146.96	157.32	130.81	143.19	140.2	102.73	134.89	127.35	134.75	152.69	148.67	167.37	165.55	169.4	133.16	143.13		0.100029	1.015	0.0966042	1.01992
Cyc1	Cytochrome c1, heme protein, mitochondrial OS=Mus musculus GN=Cyc1 PE=1 SV=1	9.37	35555.8	454.16	Q9D0M3	3	19.69	0	CY1_MOUSE	111.41	103.25	102.27	103.43	97.27	103.71	112.94	112.09	96.2	90.05	94.17	93.25	NA	NA	NA	74.86	101.64	99.7	106.07	113.98	82.38	103.54	88.54	91.14	101.67	95.76		-0.093853	1.00854	0.0980532	1.0129
Atp5d	ATP synthase subunit delta, mitochondrial OS=Mus musculus GN=Atp5d PE=1 SV=1	4.79	17600.1	407.33	Q9D3D9	2	13.69	0	ATPD_MOUSE	20.97	23.55	80.2	70.54	NA	NA	NA	NA	NA	NA	NA	NA	NA	NA	NA	NA	73.21	76.61	NA	30.72	49.96	66.51	NA	NA	48.81	59.4		0.465095	0.899174	0.126132	1.01234
Fermt2	Fermitin family homolog 2 OS=Mus musculus GN=Fermt2 PE=1 SV=1	6.25	78484.9	569.7	Q8CIB5	11	23.97	0	FERM2_MOUSE	211.01	163.25	190.53	215.17	207.01	302.35	203.14	223.58	343.3	368.17	295.05	384.59	287.91	NA	368.65	166.17	254.92	228.62	281.39	275.39	361.74	360.12	397.45	236.01	258.93	292.58		0.188654	0.983027	0.103986	1.00097
Tagln3	Transgelin-3 OS=Mus musculus GN=Tagln3 PE=1 SV=1	7.17	22641.8	529.91	Q9R1Q8	5	25.63	0	TAGL3_MOUSE	31.96	31.6	26.41	29.33	17.97	29.69	18.3	19	22.25	15.59	20.37	20.77	27.53	24.77	25.73	27.63	21.08	16.34	18.16	18.61	15.44	23.51	15.94	17.3	23.6	21		-0.159555	0.981425	0.10437	0.99431
Dpysl3	Dihydropyrimidinase-related protein 3 OS=Mus musculus GN=Dpysl3 PE=1 SV=1	6.03	62335.6	4817.25	Q62188	22	65.79	0	DPYL3_MOUSE	556.48	554.56	602.47	580.28	632.87	670.83	688.62	704.81	743.31	631.82	720.59	764.48	566.44	502.7	596.59	593.95	623.85	569.57	645.14	734.09	612.75	664.41	633.06	659.18	654.26	616.81		-0.0829596	0.989106	0.10254	0.992579
Itpr3	Inositol 1,4,5-trisphosphate receptor type 3 OS=Mus musculus GN=Itpr3 PE=1 SV=3	6.08	307127	141.42	P70227	3	1.99	0	ITPR3_MOUSE	NA	NA	637.66	1200.01	NA	1245.55	1103.63	NA	714.42	NA	579.69	1576.45	NA	NA	NA	NA	946.56	1361.73	1421.41	NA	918.05	1079.76	1040.05	1191.06	1008.2	1136.94		0.244566	0.953852	0.111211	0.984706
Lxn	Latexin OS=Mus musculus GN=Lxn PE=1 SV=2	5.37	25663	230.08	P70202	2	13.51	0	LXN_MOUSE	85.85	78.83	82.02	83.03	40.82	44.53	51.19	46.32	59.1	68.23	48.67	52.96	NA	NA	NA	54.4	50.15	64.13	45.63	55.99	47.63	58.09	45.52	62.69	61.8	53.8		-0.161835	0.968984	0.107403	0.982406
Arpc4	Actin-related protein 2/3 complex subunit 4 OS=Mus musculus GN=Arpc4 PE=1 SV=3	8.78	19781.1	577.58	P59999	4	30.95	0	ARPC4_MOUSE	59.59	58.04	61.58	56.19	45.47	40.45	42.95	52.09	59.82	55.86	50.53	63.97	NA	43.65	NA	NA	46.65	40.73	43.26	49.41	53.63	60.73	49.61	60.49	53.88	49.8		-0.11282	0.967191	0.107847	0.973749
Tln1	Talin-1 OS=Mus musculus GN=Tln1 PE=1 SV=2	5.76	271989	395.05	P26039	30	18.89	0	TLN1_MOUSE	1706.93	1342.22	1277	1902.15	1768.65	1566.33	1246	1463.24	1529.06	2198.1	1718.34	2537.04	1148.69	1055.75	1143.31	1198.2	1675.05	1418.77	1318.71	1466.65	1571.26	2175.46	2055.09	2116.47	1687.92	1528.62		-0.15492	0.961129	0.109363	0.973535
Ctnnb1	Catenin beta-1 OS=Mus musculus GN=Ctnnb1 PE=1 SV=1	5.45	86098.1	369.74	Q02248	7	11.4	0	CTNB1_MOUSE	114.12	156.98	131.23	97.49	274.65	234.53	107.02	123.22	210.52	215.35	200.91	219.65	166.85	118.38	NA	106.47	134.37	115.47	168.8	154.3	173.24	166.21	152.86	158.17	173.81	146.83		-0.181968	0.941033	0.114542	0.958466
Sptan1	Spectrin alpha chain, non-erythrocytic 1 OS=Mus musculus GN=Sptan1 PE=1 SV=4	5.04	285396	2559.4	P16546	121	61.69	0	SPTN1_MOUSE	7782.46	7313.76	6566.33	7070.68	5769.27	6265.06	7020.98	8101.26	6310.71	7733.45	5628.53	7151.44	5735.14	5094.98	4826.81	4383.89	9501.33	8106.81	12673.3	11862.7	7646.22	9238.66	8332.48	10277.4	6892.83	8139.97		0.168407	0.941033	0.114542	0.955984
Cfl1	Cofilin-1 OS=Mus musculus GN=Cfl1 PE=1 SV=3	8.22	18787.7	10372	P18760	10	66.27	0	COF1_MOUSE	427.06	415.18	413.57	392.04	340.73	345.61	445.84	396.41	305.49	310.4	300	304.15	451.34	396.48	435.47	388.11	294.65	234.61	247.95	280.8	333.83	319.3	370.75	332.14	366.37	340.45		-0.119831	0.941033	0.114542	0.948632
Atp6v1b2	V-type proton ATPase subunit B, brain isoform OS=Mus musculus GN=Atp6v1b2 PE=1 SV=1	5.45	56893.1	470.88	P62814	9	26.42	0	VATB2_MOUSE	383.99	513.06	209.75	215.72	728.63	565.69	861.66	238.43	633.22	642.61	468.46	227.47	319.02	272.09	689.44	801.37	327.85	296.05	3018.16	3522.35	341.26	380.17	349.37	354.55	474.06	889.31		0.383555	0.861188	0.137661	0.942741
Idi1	Isopentenyl-diphosphate Delta-isomerase 1 OS=Mus musculus GN=Idi1 PE=2 SV=1	5.74	26631.3	753.49	P58044	4	26.43	0	IDI1_MOUSE	181.88	252.74	185.74	187.58	86.84	95.81	147.51	153.46	169.55	153.36	169.2	173.9	223.76	129.45	205.66	229.58	118.41	109.8	125.43	132.57	129.5	107.41	94.83	133.09	163.13	144.96		-0.179383	0.925188	0.118799	0.942418
Capza2	F-actin-capping protein subunit alpha-2 OS=Mus musculus GN=Capza2 PE=1 SV=3	5.47	33138.2	366.18	P47754	3	15.03	0	CAZA2_MOUSE	158.87	159.62	130.53	145.81	180.63	218.36	185.32	210.62	97.43	186.98	85.88	173.9	109.32	131.41	134.99	114.43	154.69	151.91	130.17	146.59	144.1	168.34	145.63	175.1	161.16	142.22		-0.142973	0.93057	0.117336	0.941489
Sept11	Septin-11 OS=Mus musculus GN=Sept11 PE=1 SV=4	6.23	50036.9	700.3	Q8C1B7	9	29.47	0	SEP11_MOUSE	244.1	232.27	224.33	242.75	172.56	208.58	201.63	210.43	249.64	219.24	267.2	257.72	174.62	163.09	210.29	193.01	283.33	221.02	256.47	283.26	314.82	313.98	301.86	317.49	227.54	252.77		0.123926	0.931925	0.11697	0.940128
Fh	Fumarate hydratase, mitochondrial OS=Mus musculus GN=Fh PE=1 SV=3	9.38	54585	386.43	P97807	7	23.08	0	FUMH_MOUSE	209.52	140.38	118.13	161.39	171.68	236.9	202.86	280.75	214.13	247.67	169.76	223.18	NA	NA	NA	NA	197.66	203.75	229.48	276.02	179.71	253.39	189.7	196.44	198.03	215.77		0.148914	0.912147	0.12242	0.924222
Rplp0	60S acidic ribosomal protein P0 OS=Mus musculus GN=Rplp0 PE=1 SV=3	5.85	34387.6	623.29	P14869	7	36.91	0	RLA0_MOUSE	130.53	128.33	140.97	128.64	88.03	81.39	106.86	84.4	140.93	140.07	127.01	145.89	94.84	106.62	114.49	114.94	142.13	111.3	115.83	138.9	164.96	139.25	168.71	154.43	120.25	130.53		0.124768	0.912147	0.12242	0.92064
Ndufa9	NADH dehydrogenase [ubiquinone] 1 alpha subcomplex subunit 9, mitochondrial OS=Mus musculus GN=Ndufa9 PE=1 SV=2	10.06	42639.3	490.44	Q9DC69	5	21.22	0	NDUA9_MOUSE	103.14	97.31	86.16	93.23	63.48	71.35	71.68	73.66	77.02	80.22	65.6	79.13	NA	NA	NA	NA	101.5	101.71	104.84	128.23	65.29	80.67	65.8	69.19	80.17	89.65		0.136206	0.907902	0.123623	0.918062
Rpsa	40S ribosomal protein SA OS=Mus musculus GN=Rpsa PE=1 SV=4	4.6	32952.2	861.57	P14206	6	36.61	0	RSSA_MOUSE	116.44	111.88	120.08	121.24	67.63	81.89	66.58	76.79	105.69	104.38	99.19	114.83	NA	69.25	78.09	91.91	112.54	97.95	107.2	117.07	122.74	141.38	116.88	144.7	98.89	109.06		0.139374	0.906909	0.123906	0.917556
Ndufs8	NADH dehydrogenase [ubiquinone] iron-sulfur protein 8, mitochondrial OS=Mus musculus GN=Ndufs8 PE=1 SV=1	5.83	24494.6	327.04	Q8K3J1	2	8.49	0	NDUS8_MOUSE	68.11	70.89	88.52	67.96	54.55	56.29	76.09	105.63	76.6	73.01	68.1	94.06	65.3	NA	79.42	76.8	85.89	109.71	104.6	96.33	75.35	80.78	69.6	56.02	74.98	81.8		0.124088	0.909024	0.123304	0.917454
Ola1	Obg-like ATPase 1 OS=Mus musculus GN=Ola1 PE=1 SV=1	7.83	44957.7	465.14	Q9CZ30	3	8.84	0	OLA1_MOUSE	150.3	85.91	124.73	168.89	168.95	433.62	212.24	264.19	192.4	194.87	151.98	271.49	NA	NA	NA	NA	185.66	247.6	316.55	171.24	194.8	278.46	134.81	282.87	201.63	226.5		0.229929	0.88499	0.13032	0.914371
Apoe	Apolipoprotein E OS=Mus musculus GN=Apoe PE=1 SV=2	5.41	35923.7	262.22	P08226	3	10.29	0	APOE_MOUSE	57.05	53.59	58.19	58.86	NA	NA	NA	NA	57.37	50.68	53.95	56.35	NA	NA	NA	NA	NA	NA	NA	56.71	50.73	51.72	49.43	NA	55.76	52.15		-0.0968623	0.909024	0.123304	0.91417
Rps19	40S ribosomal protein S19 OS=Mus musculus GN=Rps19 PE=1 SV=3	10.83	16085.5	1279.67	Q9CZX8	4	28.28	0	RS19_MOUSE	61.25	63.73	60.83	59.88	50.94	61.2	63.01	64.82	73.93	71.39	71.1	83.53	64.17	47.4	48.29	61.01	72.93	66.05	68.82	74.89	88.22	98.35	83.29	91.17	65.47	72.05		0.114087	0.900263	0.125816	0.907464
Lrrc59	Leucine-rich repeat-containing protein 59 OS=Mus musculus GN=Lrrc59 PE=1 SV=1	9.97	35333.6	592.32	Q922Q8	4	15.31	0	LRC59_MOUSE	88.29	94.87	82.57	90.29	73.08	63.93	76.84	70.57	98.32	102.34	101.97	105.31	NA	100.75	NA	NA	87.8	78.14	82.66	108.94	82.53	100.13	102.19	94.4	87.37	93.06		0.100034	0.897696	0.126562	0.903253
Rap1a	Ras-related protein Rap-1A OS=Mus musculus GN=Rap1a PE=2 SV=1	6.53	21329.4	4635.09	P62835	10	72.83	0	RAP1A_MOUSE	96.26	66.22	107.64	98.22	89.95	91.69	106.08	71.16	122.48	113.77	120.28	130.77	140.03	86.06	118.09	92.03	120.21	98.19	116.51	92.98	128.34	108.18	109.05	91.16	101.21	108.4		0.110805	0.896416	0.126936	0.903239
Ndufa8	NADH dehydrogenase [ubiquinone] 1 alpha subcomplex subunit 8 OS=Mus musculus GN=Ndufa8 PE=1 SV=3	8.48	20448.3	504.68	Q9DCJ5	4	29.65	0	NDUA8_MOUSE	54.91	55.88	50.35	49.5	44.26	39.79	43.54	49.42	60.16	50.68	63.26	63.2	NA	NA	44.82	42.87	76.37	54.78	51.14	79.17	48.7	50.17	60.51	60.32	52.08	56.88		0.112731	0.894748	0.127424	0.901822
Ndufa4	Cytochrome c oxidase subunit NDUFA4 OS=Mus musculus GN=Ndufa4 PE=1 SV=2	9.9	9326.81	2473.69	Q62425	3	36.59	0	NDUA4_MOUSE	54.83	57.57	68.86	68.28	58.36	57.63	66.63	70.71	58.57	55.15	58.87	59.06	60.91	54.59	52.58	54.87	95.02	87	77.4	87.65	69.18	67.74	47.7	53.42	61.21	67.34		0.106865	0.894748	0.127424	0.901107
Dpysl2	Dihydropyrimidinase-related protein 2 OS=Mus musculus GN=Dpysl2 PE=1 SV=2	5.92	62676.9	17028	O08553	31	81.47	0	DPYL2_MOUSE	3148.56	3219.36	3252.75	3318.8	4097.35	3934.02	4595.16	5215.72	4270.15	4536.27	4474.71	4818.54	3668.76	3461.25	3463.46	3450.26	5082.7	4710.27	5169.12	5502.03	4019.25	4929.31	4181.3	4953.22	4073.45	4382.58		0.105315	0.888274	0.129338	0.894496
Hk1	Hexokinase-1 OS=Mus musculus GN=Hk1 PE=1 SV=3	6.35	109615	309.95	P17710	14	17.25	0	HXK1_MOUSE	376.67	395.86	358.03	389.38	225.18	253.4	238.54	263.63	315.11	305.39	298.5	331.52	NA	NA	NA	NA	241.37	266.17	254.07	291.95	296.52	348.83	276.54	313.23	312.6	286.08		-0.112356	0.882368	0.131109	0.889493
Atp2b1	Plasma membrane calcium-transporting ATPase 1 OS=Mus musculus GN=Atp2b1 PE=1 SV=1	5.54	135717	173.61	G5E829	4	4.75	0	AT2B1_MOUSE	324.06	314.04	290.72	312.24	227.37	274.99	249.12	265.64	310.83	348.52	286.77	358.7	NA	NA	NA	281.32	255.86	NA	272.66	305.48	253.7	309.64	271.82	277.07	296.92	278.44		-0.08431	0.88499	0.13032	0.888997
Vim	Vimentin OS=Mus musculus GN=Vim PE=1 SV=3	4.86	53744.8	25042.5	P20152	31	71.46	0	VIME_MOUSE	4337.85	4157.8	4174.87	4069.28	3683.8	3167.73	3917.1	3525.02	6723.17	6046.55	5838.05	6766.21	3114.09	3052.61	2718.07	2916.42	3922.64	4029.35	4186.96	4059.63	5614.55	6308.62	5551.62	5694.92	4700.62	4264.12		-0.15051	0.862912	0.137116	0.87594
Rab2a	Ras-related protein Rab-2A OS=Mus musculus GN=Rab2a PE=1 SV=1	6.08	23718.7	1265.46	P53994	9	58.49	0	RAB2A_MOUSE	102.37	98.53	117.8	104.27	61.82	84.32	78.99	65.16	92.61	90.31	123.55	127.27	90.44	98.83	101.71	91.26	97.67	89.5	90.27	110.57	112.07	113.55	95.03	117.02	95.58	100.66		0.10238	0.867394	0.135708	0.873415
Mapre1	Microtubule-associated protein RP/EB family member 1 OS=Mus musculus GN=Mapre1 PE=1 SV=3	4.93	30187.3	716.27	Q61166	5	32.09	0	MARE1_MOUSE	109.12	103.37	94.22	122.79	101.99	115.64	137.84	77.97	149.64	131.24	129.13	161.19	91.2	78.19	75.45	86.36	127.59	114.03	128.17	103.76	138.27	142.09	118.55	121.11	119.51	110.4		-0.117903	0.861328	0.137617	0.869361
Fdft1	Squalene synthase OS=Mus musculus GN=Fdft1 PE=2 SV=2	5.87	48838.7	291.37	P53798	3	10.82	0	FDFT_MOUSE	88.67	88.21	82.82	81.79	NA	NA	NA	NA	93.08	86.26	84.78	97.04	NA	NA	NA	NA	NA	NA	89.96	86.71	70.54	70.99	83.88	95.78	87.83	82.98		-0.0893297	0.862912	0.137116	0.867524
Ech1	Delta(3,5)-Delta(2,4)-dienoyl-CoA isomerase, mitochondrial OS=Mus musculus GN=Ech1 PE=1 SV=1	7.65	36460.7	270.39	O35459	2	7.34	0	ECH1_MOUSE	67.26	64.1	53.6	55.97	59.19	55.61	74.61	65.53	73.96	67.43	61.72	73.21	NA	NA	NA	NA	NA	NA	NA	62.83	50.45	61.31	64.8	61.8	64.35	60.24		-0.0920519	0.852498	0.140444	0.857453
Rpl23	60S ribosomal protein L23 OS=Mus musculus GN=Rpl23 PE=1 SV=1	10.94	14979.5	1312.74	P62830	2	25	0	RL23_MOUSE	61.6	62.47	48.4	59.12	35.75	39.2	36.94	43.35	65.29	62.12	58.96	73.62	49.97	42.75	40.16	55.95	62.41	40.24	56.09	68.59	68.58	73.48	67.29	81.25	53.9	58.9		0.129535	0.846308	0.14246	0.856164
Pgam2	Phosphoglycerate mutase 2 OS=Mus musculus GN=Pgam2 PE=2 SV=3	8.77	28998.2	2141.59	O70250	14	68.77	0	PGAM2_MOUSE	757.71	693.16	821.68	708.67	5172.26	5318.2	1211.83	1275.64	476.97	559.73	477.96	550.68	1666.54	1420.2	1512.11	1749.45	772.75	750.44	975.19	910.77	1131.81	1359.27	1437.33	1409.76	1502.04	1257.97		0.288295	0.80118	0.158059	0.851471
Gnb2	Guanine nucleotide-binding protein G(I)/G(S)/G(T) subunit beta-2 OS=Mus musculus GN=Gnb2 PE=1 SV=3	5.54	38072.5	2944.02	P62880	10	57.06	0	GBB2_MOUSE	319.3	330.26	293.97	299.49	219.86	220.91	255.78	264.47	310.59	313.21	310.04	362.92	250.77	228.35	236.12	238.91	292.46	277.01	261.49	279.16	325.66	326.14	292.84	293.25	291.73	275.18		-0.0781887	0.837587	0.145349	0.841229
Dpysl5	Dihydropyrimidinase-related protein 5 OS=Mus musculus GN=Dpysl5 PE=1 SV=1	6.65	62086.8	820.2	Q9EQF6	14	48.23	0	DPYL5_MOUSE	274.99	247.88	404.02	385.1	376.92	304.11	382.95	333.62	375.25	356.69	453.16	492.92	343.03	280.4	343.89	310.92	417.55	400.69	427.54	447.26	416.36	437.31	414.36	405.89	365.63	387.1		0.0931325	0.834742	0.146304	0.839922
Gnai2	Guanine nucleotide-binding protein G(i) subunit alpha-2 OS=Mus musculus GN=Gnai2 PE=1 SV=5	5.12	41059.3	1861.46	P08752	15	56.34	0	GNAI2_MOUSE	258.56	253.64	271.16	242.48	195.44	208.55	239.98	243.78	236.76	258.67	223.39	299.65	229.79	221.92	285.13	237.36	264.7	234.83	286.42	281.59	242.09	265.24	242.17	263.49	244.34	254.56		0.0625067	0.837587	0.145349	0.839916
Rab1A	Ras-related protein Rab-1A OS=Mus musculus GN=Rab1A PE=1 SV=3	5.85	22905.9	2540.34	P62821	9	58.54	0	RAB1A_MOUSE	159.66	172.2	123.01	138.82	109.78	133.69	133.18	110.64	169.29	180.13	163.08	182.96	114.43	136.14	132.05	156.14	126.9	121.83	132.54	158.99	131.83	144.48	140.24	165.32	148.04	138.41		-0.0832805	0.835759	0.145962	0.839898
Klc1	Kinesin light chain 1 OS=Mus musculus GN=Klc1 PE=1 SV=3	5.36	61906.4	230.18	O88447	6	12.38	0	KLC1_MOUSE	151.79	151.71	146.05	155.81	116.7	106.85	182.29	136.81	157.75	163.99	167.84	192.11	NA	NA	NA	171.85	138.25	172.06	137.77	160.79	159.67	185.18	144.14	178.42	152.48	160.9		0.0878352	0.834742	0.146304	0.839351
Etfb	Electron transfer flavoprotein subunit beta OS=Mus musculus GN=Etfb PE=1 SV=3	8.25	27851.4	1142.58	Q9DCW4	9	43.92	0	ETFB_MOUSE	75.88	78.45	75.82	76.85	155.08	153.78	169.42	174.73	127.97	110.03	129.44	128.41	74.18	66.14	72.03	96.61	123.61	104.25	119.87	125.38	122.07	128.31	124.8	133.18	121.32	107.54		-0.144599	0.824149	0.149917	0.836738
Hnrnpk	Heterogeneous nuclear ribonucleoprotein K OS=Mus musculus GN=Hnrnpk PE=1 SV=1	5.22	51261.5	217.36	P61979	2	6.26	0	HNRPK_MOUSE	134.85	136.29	115.93	116.66	83.17	NA	108.91	86.32	110.91	110.37	96.75	112.05	NA	NA	NA	NA	NA	121.38	98.98	131.48	76.91	121.31	114.11	207.24	110.2	124.49		0.133063	0.825488	0.149456	0.836143
Cox4i1	Cytochrome c oxidase subunit 4 isoform 1, mitochondrial OS=Mus musculus GN=Cox4i1 PE=1 SV=2	9.59	19587.5	3728.95	P19783	7	40.83	0	COX41_MOUSE	151.37	156.86	135.73	133.39	121.66	125.4	132.87	139.93	158.21	141.94	151.25	169.24	109.63	98.39	108.47	108.08	157.25	139.63	156.76	163.37	140.89	134.35	156.13	168.35	143.15	136.78		-0.0822016	0.830909	0.147601	0.834966
Calr	Calreticulin OS=Mus musculus GN=Calr PE=1 SV=1	4.14	48165.7	697.69	P14211	9	35.1	0	CALR_MOUSE	245.03	204.24	234.28	228.47	198.59	229.04	236.68	216.2	278.27	234.3	256.89	300.19	167.92	146.86	218.57	173.02	336.44	242.42	316.41	307.2	327.23	342.32	315.48	320.86	238.51	267.89		0.118266	0.825347	0.149504	0.833777
Eno1	Alpha-enolase OS=Mus musculus GN=Eno1 PE=1 SV=3	6.38	47483.1	34889.3	P17182	24	70.51	0	ENOA_MOUSE	4443.09	4010.14	3549.44	3590.84	4250.95	5218.65	4790.52	6110.66	5687	5658	4721.79	5558.22	3843.69	3815.49	3970.75	4186.65	4735.38	4822.4	5352.41	6402.77	3598.04	3904.32	4436.28	4875.34	4799.11	4495.29		-0.0919331	0.826154	0.149226	0.831254
Acly	ATP-citrate synthase OS=Mus musculus GN=Acly PE=1 SV=1	7.12	120641	1134.88	Q91V92	36	45.19	0	ACLY_MOUSE	904.84	935.95	1230.12	1272.45	1136.61	1076.42	974.59	872.9	1049.39	895.44	1334.99	1383.75	882.25	677.35	759.68	786.84	1344.79	971.89	1034.5	999.66	1421.71	1096.55	1220.61	1121.99	1088.95	1026.48		-0.101352	0.824477	0.149804	0.830683
Rab5b	Ras-related protein Rab-5B OS=Mus musculus GN=Rab5b PE=1 SV=1	8.24	23935	1214.87	P61021	6	35.81	0	RAB5B_MOUSE	104.82	116.15	99.15	92.44	88.22	92.03	104.51	107.53	120.93	119.79	104.44	115.63	118.73	92.09	107.27	132.24	76.25	85.26	92.4	113.11	89.63	102.17	97.49	104.21	105.47	100.9		-0.071774	0.824477	0.149804	0.827595
Slc44a2	Choline transporter-like protein 2 OS=Mus musculus GN=Slc44a2 PE=1 SV=2	8.79	81592.8	165.02	Q8BY89	2	3.97	0	CTL2_MOUSE	389.7	356.12	341.93	365.1	340.79	360.37	379.74	349.78	358.37	360.34	344.59	408.75	409.44	268.56	412.49	310.8	349.42	321.86	328.95	366.57	364.48	369.96	344.71	361.83	362.97	350.76		-0.0564126	0.825347	0.149504	0.827273
P4hb	Protein disulfide-isomerase OS=Mus musculus GN=P4hb PE=1 SV=2	4.58	57457.7	633.11	P09103	13	37.33	0	PDIA1_MOUSE	278.61	267.78	417.21	456.93	242.82	165.39	286.47	138.76	325.5	225.43	350.78	434.9	167.06	147.85	140	147.81	364.84	302.98	307.12	219.39	384.95	315.66	414.81	305.69	299.22	268.18		-0.176279	0.790826	0.161873	0.810234
Actbl2	Beta-actin-like protein 2 OS=Mus musculus GN=Actbl2 PE=1 SV=1	5.15	42346.5	4604.56	Q8BFZ3	9	28.99	0	ACTBL_MOUSE	3098.39	2974.22	2779.12	2931.02	2121.12	2473.83	2399.56	2718.58	3098.74	2966.87	2679.86	3018.74	2607.24	2593.52	2660.82	2503.67	2795.1	2437.89	2703.88	2871.88	3330.43	3436.34	3566.36	3361.03	2771.67	2905.68		0.0645719	0.79003	0.16217	0.792665
Endod1	Endonuclease domain-containing 1 protein OS=Mus musculus GN=Endod1 PE=1 SV=2	5.74	55946.6	231.08	Q8C522	2	6.79	0	ENDD1_MOUSE	159.84	170.68	110	142.53	97.67	91.01	115.32	95.66	178.27	124.76	112.44	111.7	NA	NA	118.86	121.96	112.41	99.84	111.67	144	136.61	146.26	158.55	186.86	125.82	133.7		0.0994261	0.770067	0.169798	0.776459
Uchl1	Ubiquitin carboxyl-terminal hydrolase isozyme L1 OS=Mus musculus GN=Uchl1 PE=1 SV=1	4.97	25180.5	889.01	Q9R0P9	6	34.98	0	UCHL1_MOUSE	157.75	152.76	166.39	173.33	73.97	78.89	82.86	84.61	139.34	138.9	138.81	157.05	144.11	149.87	133.8	149.24	98.05	103.17	84.67	96.87	107	123.81	92.64	104.18	128.72	115.62		-0.115899	0.760473	0.173591	0.769254
Rpl27	60S ribosomal protein L27 OS=Mus musculus GN=Rpl27 PE=1 SV=2	10.98	15797.8	352	P61358	2	22.06	0	RL27_MOUSE	51.04	55.88	56.71	55.71	31.41	23.64	29.34	29.13	57.24	54.4	59.54	57.89	39.96	NA	32.18	33.64	36.59	38.82	33.26	44.82	51.72	48.98	50.55	47.29	46.83	41.62		-0.119269	0.753578	0.176369	0.762958
Cct5	T-complex protein 1 subunit epsilon OS=Mus musculus GN=Cct5 PE=1 SV=1	5.63	60080.5	297.01	P80316	5	15.71	0	TCPE_MOUSE	1744	1884.63	1464.61	1317.48	33252.1	29943.7	2304.59	2673.13	1147	1064.98	876.62	990	7343.13	7989.46	5891.98	3964.46	1534.63	1416.77	1719.7	1940.24	2537.98	2427.35	2950.8	3225.1	6555.24	3578.47		0.318415	0.68745	0.205376	0.757612
Rab5c	Ras-related protein Rab-5C OS=Mus musculus GN=Rab5c PE=1 SV=2	8.58	23640.7	3257.67	P35278	10	62.5	0	RAB5C_MOUSE	116.97	129.1	100.44	105.44	103.4	122.57	122.63	140.64	150.49	158.87	134.3	146.18	138.78	144.07	148.69	181.07	109.42	112.22	119.92	149.59	112.96	135.88	123.35	127.34	127.58	133.61		0.0667534	0.75002	0.17782	0.752984
Pacsin1	Protein kinase C and casein kinase substrate in neurons protein 1 OS=Mus musculus GN=Pacsin1 PE=1 SV=1	4.97	50917.5	223.63	Q61644	3	6.8	0	PACN1_MOUSE	89.39	97.56	126.71	92.93	104.69	93.7	103.06	103.26	91.65	104.47	103.7	113.53	NA	NA	NA	NA	NA	NA	95.42	96.9	106.55	88.6	106.02	92.69	102.05	97.7		-0.0596469	0.75002	0.17782	0.752388
Ahsg	Alpha-2-HS-glycoprotein OS=Mus musculus GN=Ahsg PE=1 SV=1	6.04	38124.1	497.99	P29699	4	20.29	0	FETUA_MOUSE	222.04	213.52	560.33	700.12	246.73	73.77	238.94	84.13	268.74	168.39	343.83	331.47	358.84	137.78	313.86	166.69	474.05	247.89	311.24	156.65	458.71	204.02	643.39	212.92	287.67	307.17		0.203047	0.70342	0.197961	0.732139
Itgb1	Integrin beta-1 OS=Mus musculus GN=Itgb1 PE=1 SV=1	5.57	91482	269.09	P09055	4	8.15	0	ITB1_MOUSE	294.75	264.66	285.81	309.58	178.56	207.07	227.22	285.2	352.89	308.06	313.29	380.9	235.53	235.32	228.76	309.07	244.5	218.52	209.29	249.73	273.24	348.54	326.53	325.89	284	267.08		-0.0793386	0.726568	0.187686	0.730887
Rps3	40S ribosomal protein S3 OS=Mus musculus GN=Rps3 PE=1 SV=1	10.04	26845.4	1066.21	P62908	9	46.09	0	RS3_MOUSE	84.66	89.22	79.87	84.5	58.39	66.35	57.26	69.58	97.69	97.13	95.26	111.07	NA	61.34	58.08	64.59	87.42	86.47	75.97	98.54	107.1	108.07	106.71	122.04	82.58	88.76		0.0916235	0.718187	0.191343	0.724008
Dstn	Destrin OS=Mus musculus GN=Dstn PE=1 SV=3	7.99	18863.8	1549.36	Q9R0P5	12	70.3	0	DEST_MOUSE	93.46	89.33	105.94	107.2	86.59	97.36	101.49	102.94	73.51	64.42	79.85	80.01	129.1	90.55	102.36	111.75	80.61	75.36	72.29	70.17	81.85	94.92	73.02	57.43	90.18	86.62		-0.0760198	0.718187	0.191343	0.722199
Bcam	Basal cell adhesion molecule OS=Mus musculus GN=Bcam PE=2 SV=1	5.81	68468.6	350.95	Q9R069	6	13.34	0	BCAM_MOUSE	237.85	262.14	207.27	205.77	156.29	137.15	215.13	157.99	220.87	214.05	208.52	215.12	173.99	154.99	166.05	182.64	248.39	177.88	241.13	193.54	191.47	190.72	187.44	205.75	203.18	192.83		-0.0658982	0.718187	0.191343	0.721204
Etfa	Electron transfer flavoprotein subunit alpha, mitochondrial OS=Mus musculus GN=Etfa PE=1 SV=2	8.49	35351.6	885.51	Q99LC5	8	36.34	0	ETFA_MOUSE	121.78	91.37	90.53	112.18	208.72	222.12	227.73	265.08	176.88	201.4	166.32	184	106.89	103.38	127.83	128.03	197.83	146.86	198.31	191.61	145.31	165.43	174.33	167.17	172.34	154.42		-0.108467	0.703197	0.198063	0.711513
S100a10	Protein S100-A10 OS=Mus musculus GN=S100a10 PE=1 SV=2	6.34	11300.1	987.5	P08207	2	27.84	0	S10AA_MOUSE	78.63	80.95	155.98	153.89	60.86	58.79	77.36	87.49	56.53	47.27	59.06	59.85	74.6	58.79	53.76	64.55	84.46	85.93	57.11	65.71	88.82	83	68.1	69.95	81.39	71.23		-0.105293	0.703197	0.198063	0.711036
Map1lc3b	Microtubule-associated proteins 1A/1B light chain 3B OS=Mus musculus GN=Map1lc3b PE=1 SV=3	9.12	14616.9	481.11	Q9CQV6	2	16.8	0	MLP3B_MOUSE	60.75	62.92	68.24	65.93	49.28	53.7	53.35	58.66	51.04	46.14	54.21	56.58	70.6	59.74	63.27	63	58.38	48.99	48.58	55.03	60.2	66.82	54.36	54.56	56.73	58.63		0.0479976	0.70342	0.197961	0.705056
Slc3a2	4F2 cell-surface antigen heavy chain OS=Mus musculus GN=Slc3a2 PE=1 SV=1	5.52	58450.7	222.3	P10852	2	5.89	0	4F2_MOUSE	117.86	114.07	119.28	118.46	87.44	97.5	128.54	87.07	137.01	110.77	124.08	132.44	NA	NA	NA	NA	103.83	NA	NA	107.74	131.79	95.25	117.3	97.89	114.54	108.97		-0.0665014	0.695169	0.201758	0.698343
Sdhb	Succinate dehydrogenase [ubiquinone] iron-sulfur subunit, mitochondrial OS=Mus musculus GN=Sdhb PE=1 SV=1	8.7	32612.4	398.98	Q9CQA3	5	20.21	0	SDHB_MOUSE	112.25	121.19	107.87	103.96	89.04	93.3	92.52	117.65	110.43	98.83	110.92	118.09	105.68	87.67	84.7	96.74	138.97	91.34	130.08	149.02	111.24	118.06	117.3	108.34	106.34	111.6		0.0550631	0.695169	0.201758	0.697346
Hsp90ab1	Heat shock protein HSP 90-beta OS=Mus musculus GN=Hsp90ab1 PE=1 SV=3	4.78	83623.5	2426.63	P11499	23	38.4	0	HS90B_MOUSE	973.47	973.55	839.06	956.93	436.79	375.78	444.01	436.13	800.85	660.91	676.87	796.47	594.9	517.83	515.58	580.79	669.14	693.37	770.8	984.81	831.01	897.36	763.33	855.71	697.57	722.89		0.0997678	0.689839	0.204249	0.697016
Rap2a	Ras-related protein Rap-2a OS=Mus musculus GN=Rap2a PE=1 SV=2	4.53	20870.6	809.24	Q80ZJ1	6	39.89	0	RAP2A_MOUSE	42.22	39.42	44.71	48.98	31.84	37.06	33.51	36.59	49.48	47.64	42.14	51.29	NA	NA	NA	NA	41.96	NA	42.42	53.86	41.06	42.16	39.42	44.27	42.07	43.59		0.0607993	0.68763	0.205291	0.690312
Fkbp3	Peptidyl-prolyl cis-trans isomerase FKBP3 OS=Mus musculus GN=Fkbp3 PE=1 SV=2	9.73	25204.8	558.41	Q62446	4	24.55	0	FKBP3_MOUSE	117.45	123.76	113.99	121.34	86.7	82.39	93.22	92.12	113.06	113.44	99.58	114.88	133.55	152.48	91.66	114.75	88.7	172.88	88.24	98.07	100.68	109.1	98.37	99.28	105.99	112.31		0.0627289	0.681942	0.207997	0.684821
Anxa2	Annexin A2 OS=Mus musculus GN=Anxa2 PE=1 SV=2	7.69	38961.4	19168.5	P07356	25	71.68	0	ANXA2_MOUSE	4952.91	5193.79	6221.67	4078.04	3407.23	3509.92	3550.01	3785.08	4385.7	4234.44	5139.84	4663.85	3836.16	3377.52	3148.65	3451	5545.05	3412.54	4054.74	4457.65	5070.14	4864.7	4406.55	5226.62	4426.87	4237.61		-0.0642859	0.681644	0.20814	0.684669
Tecr	Very-long-chain enoyl-CoA reductase OS=Mus musculus GN=Tecr PE=1 SV=1	9.78	36489.7	356.21	Q9CY27	2	6.17	0	TECR_MOUSE	178.8	176.97	167.92	184.78	149.9	162.73	81.75	89.42	154.57	160.71	157.46	161.99	115.01	132.47	135.26	147.82	170.95	163.33	155.61	166.81	173.66	190.4	157.14	173.64	152.25	156.84		0.0703725	0.68056	0.20866	0.684189
Myo1c	Unconventional myosin-Ic OS=Mus musculus GN=Myo1c PE=1 SV=2	9.62	122800	503.2	Q9WTI7	14	20.23	0	MYO1C_MOUSE	327.63	360.91	423.5	395.43	308.63	324.72	358.26	388.94	421.29	408.67	532.1	461.15	337.26	304.7	382.65	463.91	407.21	311.27	351.39	410.19	488.92	473.39	477.77	515.51	392.6	410.35		0.0584639	0.680697	0.208595	0.683203
Hagh	Hydroxyacylglutathione hydrolase, mitochondrial OS=Mus musculus GN=Hagh PE=1 SV=2	7.61	34540.4	343.63	Q99KB8	3	12.94	0	GLO2_MOUSE	152.04	155.21	113.19	121.11	1027.47	1036.19	720.32	777.87	108.65	101.66	100.44	111.04	199.09	198.29	200.1	231.33	204.17	162.99	149.14	158.03	237.63	247.58	233.88	235.57	377.1	204.82		-0.196278	0.65193	0.222879	0.680837
Wdr1	WD repeat-containing protein 1 OS=Mus musculus GN=Wdr1 PE=1 SV=3	6.11	67091.1	646.34	O88342	13	31.68	0	WDR1_MOUSE	178.57	189.93	186.25	167.06	259.06	249.33	287.83	314.79	449.06	389.55	409.18	445.64	198.72	167.93	192.77	213.66	345.15	257.29	281.63	332.79	288.55	291.84	295.42	314.73	293.85	265.04		-0.0947614	0.665405	0.21607	0.672119
Eif4a1	Eukaryotic initiation factor 4A-I OS=Mus musculus GN=Eif4a1 PE=1 SV=1	5.15	46382.2	492.6	P60843	7	23.4	0	IF4A1_MOUSE	178.23	176.81	186.39	177.41	77.35	76.35	109.45	108.09	144.21	132.08	140.42	140.54	123	NA	123.97	NA	119.65	118.66	113.64	136.12	166.45	180.17	169.89	163.8	137.28	141.53		0.0826018	0.664341	0.2166	0.669457
Prdx3	Thioredoxin-dependent peroxide reductase, mitochondrial OS=Mus musculus GN=Prdx3 PE=1 SV=1	7.37	28355.2	696.46	P20108	2	16.34	0	PRDX3_MOUSE	72.14	76.97	67.64	61.81	67.71	51.56	64.72	69.16	72.77	82.6	75.16	82.67	NA	NA	NA	NA	71.01	62.78	59.15	71.54	63.71	78.54	66.61	70.13	70.41	67.93		-0.0457615	0.664341	0.2166	0.665915
Cox6b1	Cytochrome c oxidase subunit 6B1 OS=Mus musculus GN=Cox6b1 PE=1 SV=2	8.97	10299.6	1047.82	P56391	3	41.86	0	CX6B1_MOUSE	21.1	20.64	53.52	44.75	15.97	17.87	22.45	34.97	15.46	16.32	20.74	21.33	NA	NA	NA	NA	44.77	28.08	19.62	26.71	22.96	18.28	NA	NA	25.43	26.74		0.129289	0.652802	0.222432	0.665482
Napa	Alpha-soluble NSF attachment protein OS=Mus musculus GN=Napa PE=1 SV=1	5.15	33645.9	258.32	Q9DB05	4	14.58	0	SNAA_MOUSE	68.99	70.98	69.24	63.81	45.77	53.9	55.63	62.81	56.63	59.64	51.16	64.02	NA	NA	NA	NA	NA	NA	NA	58.2	59.22	67.08	46.06	NA	60.22	57.64		-0.0643847	0.656981	0.220302	0.660128
Dctn2	Dynactin subunit 2 OS=Mus musculus GN=Dctn2 PE=1 SV=3	4.97	44231	423.76	Q99KJ8	4	14.68	0	DCTN2_MOUSE	117.15	119.57	111.93	123.93	73.08	70.38	87.66	85.22	106.48	98.79	100.16	115.53	NA	NA	NA	NA	100.94	81.2	81.84	83.02	100.55	112.35	99.12	108.9	100.82	95.99		-0.0582944	0.65515	0.221233	0.657738
Arpc5	Actin-related protein 2/3 complex subunit 5 OS=Mus musculus GN=Arpc5 PE=2 SV=3	5.31	16345.4	437.49	Q9CPW4	2	20.53	0	ARPC5_MOUSE	45.9	45.28	51.63	47.05	35.34	31.37	39.37	36.2	41.5	32.74	46.87	37.52	NA	NA	NA	NA	43.14	30.67	33.8	31.11	45.84	43.48	40.69	46.26	40.9	39.37		-0.0563796	0.65515	0.221233	0.657571
Capn2	Calpain-2 catalytic subunit OS=Mus musculus GN=Capn2 PE=2 SV=4	4.67	80727.7	307.26	O08529	8	18.86	0	CAN2_MOUSE	346.06	379.73	360.41	340.17	168.08	221.36	272.73	255.77	289.45	275.03	282.25	307	212.47	180.83	221.38	210.91	321.93	327.28	277.76	330.4	421.85	459.63	366.83	450.1	291.5	315.11		0.0787551	0.652802	0.222432	0.657535
Rab1b	Ras-related protein Rab-1B OS=Mus musculus GN=Rab1b PE=1 SV=1	5.39	22358.3	2443.37	Q9D1G1	8	57.21	0	RAB1B_MOUSE	100.19	103.85	82.25	83.29	62.63	72.26	74.53	67.09	111.21	98.78	93.1	118.37	87.02	94.19	91.76	111.82	78.03	85.41	85.34	104.83	73.2	100.04	81.96	99.89	88.96	91.12		0.0518722	0.65515	0.221233	0.6572
Phgdh	D-3-phosphoglycerate dehydrogenase OS=Mus musculus GN=Phgdh PE=1 SV=3	6.1	57384	794.46	Q61753	10	23.64	0	SERA_MOUSE	450.21	465.61	357.16	348.59	158.96	166.78	195.76	196.69	263.94	261.27	253.44	272.6	279.05	259.01	222.54	280.7	262.44	248.31	244.1	277.91	288.6	337.92	345.89	356.66	282.58	283.59		0.0766532	0.651719	0.222988	0.656212
Wars	Tryptophan--tRNA ligase, cytoplasmic OS=Mus musculus GN=Wars PE=1 SV=2	6.45	54928.3	202.23	P32921	2	7.07	0	SYWC_MOUSE	172.6	202.89	151.16	160.31	227.33	152.48	242.45	265.33	142.72	155.53	137.32	170.2	NA	NA	NA	NA	172.73	139.56	163.71	192.04	156.44	197.13	140.41	210.86	181.69	171.61		-0.0641788	0.652802	0.222432	0.655949
Rpl7	60S ribosomal protein L7 OS=Mus musculus GN=Rpl7 PE=1 SV=2	11.32	31476.7	1254.35	P14148	10	41.11	0	RL7_MOUSE	150.12	140.15	238.99	146.55	211.92	140.04	170.33	123.33	185.89	184.82	256.44	263.91	123.47	143.73	125.34	129.24	254.27	160.77	160.42	154.14	302.41	201.8	188.02	173.2	184.37	176.4		-0.0739375	0.651423	0.22314	0.655606
Gjc3	Gap junction gamma-3 protein OS=Mus musculus GN=Gjc3 PE=2 SV=2	8.37	30805.9	1597.6	Q921C1	8	42.38	0	CXG3_MOUSE	466.36	412.5	476.47	378.17	349.15	342.77	398.41	332.27	497.4	462.12	570.71	475.4	402.33	311.61	350.88	358.9	489.43	360.62	426.09	456.92	470.06	466.43	456.89	428.58	430.15	414.89		-0.0463542	0.651462	0.22312	0.653109
Dnm1	Dynamin-1 OS=Mus musculus GN=Dnm1 PE=1 SV=2	7.64	98202.2	316.52	P39053	10	12.8	0	DYN1_MOUSE	308.86	293.16	300.17	303.01	240.99	225.2	265.46	243.34	324.28	288.82	332.27	351.08	267.79	256.79	238.97	286.68	268.52	349.9	283.06	346.4	310.94	310.14	310.9	339.42	289.72	297.46		0.0404631	0.651719	0.222988	0.652974
Rpn1	Dolichyl-diphosphooligosaccharide--protein glycosyltransferase subunit 1 OS=Mus musculus GN=Rpn1 PE=1 SV=1	6	68699.5	754	Q91YQ5	17	39.47	0	RPN1_MOUSE	367.89	337.88	407.74	415.36	246.92	268.06	297.45	284.32	396.18	407.88	408.3	492.27	287.02	267.75	237.59	294.23	409.73	371.22	402.23	413.43	462.28	546.54	437.75	435.56	360.85	380.44		0.0645167	0.649718	0.224018	0.652913
Nme1	Nucleoside diphosphate kinase A OS=Mus musculus GN=Nme1 PE=1 SV=1	7.26	17321.9	8050.61	P15532	14	80.26	0	NDKA_MOUSE	380.03	379.93	376.4	429.92	324.95	312.59	339.05	368.59	320.75	314.12	288.56	301.25	366	290.82	301.52	295.8	425.82	362.68	366.58	379.71	408.91	409.14	315.1	334.03	344.68	354.67		0.0390162	0.651462	0.22312	0.65263
Cyb5b	Cytochrome b5 type B OS=Mus musculus GN=Cyb5b PE=1 SV=1	4.6	16375	1406.52	Q9CQX2	3	42.47	0	CYB5B_MOUSE	88.62	85.04	91.42	77.29	63.79	77.62	94.27	74.36	92.89	82.74	83.18	83.42	81.57	76.68	62.51	78.8	91.23	70.09	93.02	96.83	97.2	81.58	109.27	88.92	82.89	85.64		0.0393334	0.645279	0.226319	0.646477
Usmg5	Up-regulated during skeletal muscle growth protein 5 OS=Mus musculus GN=Usmg5 PE=1 SV=1	10.16	6438.56	690.07	Q78IK2	2	43.1	0	USMG5_MOUSE	20.37	19.96	19.51	17.09	13.72	20.71	24.63	16.5	17.65	22.93	16.35	18.63	17.23	14.96	15.61	15.03	19.09	19.76	20.58	24.96	18.17	NA	19.39	17.72	19	18.41		-0.0445326	0.641869	0.228103	0.643412
Phb	Prohibitin OS=Mus musculus GN=Phb PE=1 SV=1	5.43	29877.2	906.13	P67778	9	50	0	PHB_MOUSE	131.69	129.64	153.14	134.91	107.94	109.77	120.75	130.35	126.37	133.23	157.04	165.03	100.94	82.63	105.76	120.32	181.78	150.78	152.38	187.9	155.64	157.76	142.51	152.5	133.32	140.91		0.0525779	0.638886	0.229675	0.641046
Mpp6	MAGUK p55 subfamily member 6 OS=Mus musculus GN=Mpp6 PE=1 SV=1	5.96	62916	948.23	Q9JLB0	20	41.59	0	MPP6_MOUSE	317.02	299.65	262.19	341.53	275.97	351.49	453.49	501.72	382.09	455.49	341.83	411.01	322.03	275.66	300.1	325.65	379.65	408.72	334.7	373.82	370.93	441.16	326.06	347.6	366.12	350.51		-0.0462791	0.638358	0.229955	0.640033
Vapa	Vesicle-associated membrane protein-associated protein A OS=Mus musculus GN=Vapa PE=1 SV=2	8.59	28083.4	299.24	Q9WV55	2	12.85	0	VAPA_MOUSE	26.9	26.7	53.01	65.83	19.94	19.56	23.24	24.18	25.75	21.46	53.94	49.78	NA	NA	NA	NA	42.26	20.74	20.21	22.29	51	36.53	24.89	26.34	34.19	30.53		-0.106936	0.629415	0.234739	0.638434
Slc25a1	Tricarboxylate transport protein, mitochondrial OS=Mus musculus GN=Slc25a1 PE=2 SV=1	10.22	34273.7	1105.33	Q8JZU2	8	29.58	0	TXTP_MOUSE	301.11	368.86	302.48	338.68	279.45	301.81	295.45	316.74	306.2	280.34	289.35	301.48	334.42	262.15	206.7	228.85	398.98	347.52	349.75	407.4	351.17	352.14	283.5	333.48	306.83	321.34		0.0425287	0.635418	0.231516	0.63684
Arpc1b	Actin-related protein 2/3 complex subunit 1B OS=Mus musculus GN=Arpc1b PE=2 SV=4	8.3	41862.3	292.63	Q9WV32	3	9.95	0	ARC1B_MOUSE	81.42	79.19	76	72.12	73.17	69	86.29	73.04	79.2	87.18	92.86	91.39	NA	NA	NA	NA	95.69	86.19	77.38	75.61	87.95	68.01	77.37	88.5	80.07	82.09		0.0345869	0.635418	0.231516	0.636359
Rps20	40S ribosomal protein S20 OS=Mus musculus GN=Rps20 PE=1 SV=1	10.44	13486.8	859.9	P60867	3	25.21	0	RS20_MOUSE	54.36	59.34	47.56	39.63	44.91	51.79	46.94	47.18	52.62	39.37	52.62	60.23	36.22	29.14	NA	30.35	53.29	53.72	54.09	59.36	64.79	72.07	67.27	72.27	49.71	53.87		0.0618252	0.629415	0.234739	0.632444
Hsd17b11	Estradiol 17-beta-dehydrogenase 11 OS=Mus musculus GN=Hsd17b11 PE=2 SV=1	8.88	33165.8	611.29	Q9EQ06	5	27.18	0	DHB11_MOUSE	112.02	80.84	137.26	161.05	156.26	119.24	168.92	80.3	153.73	140.78	184.51	232.62	174.66	80.76	83.56	77.85	169.58	140.66	192.98	137.17	185.6	140.04	152.81	109.53	143.96	137.1		-0.0749043	0.625078	0.237095	0.62955
Pgam1	Phosphoglycerate mutase 1 OS=Mus musculus GN=Pgam1 PE=1 SV=3	6.79	28946.1	816.86	Q9DBJ1	3	13.78	0	PGAM1_MOUSE	21.14	21.94	17.9	18.37	9.07	9.73	10.32	12.07	11.87	11.19	10.88	19.36	18.48	13.31	9.41	10.87	17.9	16.96	18.51	20.45	19.86	11.54	10.83	11.76	14.49	14.99		0.0706111	0.624742	0.237278	0.62872
Cav2	Caveolin-2 OS=Mus musculus GN=Cav2 PE=1 SV=1	5.2	18455.2	1316.06	Q9WVC3	4	40.74	0	CAV2_MOUSE	62.99	57.96	56.5	51.58	43.7	67.62	50.59	49.33	53.97	47.85	42.41	52.44	NA	43.2	42.32	51.35	55.91	52.64	44.31	52.29	54.95	51.63	57.62	63	53.08	51.75		-0.0343052	0.62398	0.237695	0.624923
Map1b	Microtubule-associated protein 1B OS=Mus musculus GN=Map1b PE=1 SV=2	4.57	271510	527.06	P14873	34	20.94	0	MAP1B_MOUSE	3508.92	3444.5	2159.95	2505.32	1926.6	2963.48	2073.44	3040.08	3038.5	3205.1	2497.01	2827.83	2634.07	3519.28	3028.76	3946.91	2041.78	2177.68	2268.17	3176.42	2130.29	3138.83	3080.43	3322.52	2765.89	2872.09		0.0488197	0.62196	0.238803	0.623873
Sept7	Septin-7 OS=Mus musculus GN=Sept7 PE=1 SV=1	8.77	50892.1	1925.34	O55131	15	46.1	0	SEPT7_MOUSE	432.2	459.44	377.27	415.99	333.18	363.26	383.69	382.21	442.59	460.81	437.58	510.68	390.77	305.04	329.81	358.8	429.75	389.29	438.75	527.18	470	520.43	471.92	543.83	416.58	431.3		0.0368993	0.616649	0.241741	0.617752
Hadhb	Trifunctional enzyme subunit beta, mitochondrial OS=Mus musculus GN=Hadhb PE=1 SV=1	9.73	51671.6	1487.47	Q99JY0	13	33.89	0	ECHB_MOUSE	355.28	387.63	388.61	415.48	435.3	466	549.75	471.09	523.53	376.12	415.99	499.28	281.12	347.17	320.24	377.91	528.25	506.2	566.75	568.43	501.73	544.4	414.26	605.26	440.34	463.48		0.0453831	0.613667	0.243407	0.615343
Apoh	Beta-2-glycoprotein 1 OS=Mus musculus GN=Apoh PE=1 SV=1	8.12	39930.5	1302.22	Q01339	10	35.07	0	APOH_MOUSE	238.75	252.9	236.78	240.25	223.99	222.24	246.39	256.75	239.51	269.41	273.24	286.1	218.89	177.21	180.92	225.36	258.96	243.66	254.35	272.07	325.46	322.3	308.09	332.03	248.86	259.94		0.0368001	0.613667	0.243407	0.61477
Tmed4	Transmembrane emp24 domain-containing protein 4 OS=Mus musculus GN=Tmed4 PE=2 SV=1	8.31	26250.1	546.09	Q8R1V4	2	12.33	0	TMED4_MOUSE	31.71	26.75	30.02	28.66	13.98	NA	17.57	16.8	38.3	24.74	36.98	27.47	25.3	NA	NA	NA	23.11	NA	28.09	22.72	38.12	16.53	31.95	34.36	26.63	27.52		0.0691708	0.605697	0.247915	0.609634
Postn	Periostin OS=Mus musculus GN=Postn PE=1 SV=2	7.27	93828.1	266.55	Q62009	3	6.8	0	POSTN_MOUSE	219.21	196.85	203.63	203.49	157.19	188.2	191.22	214.64	246.28	294.75	215.98	307.85	NA	NA	NA	NA	221.4	238.51	214.73	224.76	196.4	245.88	227.32	210.36	219.94	222.42		0.0371883	0.605499	0.248028	0.60664
S100b	Protein S100-B OS=Mus musculus GN=S100b PE=2 SV=2	4.28	10842.1	1300.68	P50114	2	40.22	0	S100B_MOUSE	55.5	47.34	164.69	132.26	66.79	54.56	90.4	50.53	79.36	69.78	102.99	103.53	118.94	85.76	66.78	34.75	132.38	130.7	69.82	38.56	137.2	126.88	40.64	33.94	84.81	84.69		-0.0905981	0.599294	0.251597	0.606103
Flna	Filamin-A OS=Mus musculus GN=Flna PE=1 SV=5	5.61	284073	617.89	Q8BTM8	51	31.24	0	FLNA_MOUSE	1562.9	1235.08	1339.15	1682.54	1345.14	1844.44	1650.31	1960.65	1772.04	1857.92	1596.08	2112.01	1172.62	893.79	919.72	970.38	1584.83	1804.28	1673.41	2053.07	2069.52	2513.58	1978.63	2561.28	1663.19	1682.93		-0.0564735	0.600251	0.251044	0.602901
Nsdhl	Sterol-4-alpha-carboxylate 3-dehydrogenase, decarboxylating OS=Mus musculus GN=Nsdhl PE=2 SV=1	7.78	40971.1	766.79	Q9R1J0	8	33.7	0	NSDHL_MOUSE	184.76	138.48	134.56	149.46	94.44	111.52	133.45	136.49	150.01	156.82	138.15	155.1	160.31	NA	101.73	114.54	140.15	129.69	159.48	159.82	155.91	183.92	113.68	94.05	140.27	137.57		-0.039771	0.600498	0.250901	0.601813
Ugt8	2-hydroxyacylsphingosine 1-beta-galactosyltransferase OS=Mus musculus GN=Ugt8 PE=2 SV=2	9.66	61477.5	668.24	Q64676	7	14.97	0	CGT_MOUSE	500.93	365.61	357.62	384.08	248.54	305.67	269.33	257.6	463.64	452.39	410.16	452.06	406.79	283.83	283.26	233.6	378.82	387.39	401.11	385.37	414.69	492.43	470.71	449.96	372.3	382.33		0.0449687	0.599294	0.251597	0.600979
Mapk1	Mitogen-activated protein kinase 1 OS=Mus musculus GN=Mapk1 PE=1 SV=3	6.53	41674.9	728.92	P63085	7	24.3	0	MK01_MOUSE	176.67	168.57	161.04	154.51	166.86	169.9	191.39	191.62	147.81	190.16	189.04	192.63	128.91	106.24	128.97	147.8	215.27	194.47	192.64	216.42	206.65	190.91	182.7	179.56	175.02	174.21		-0.0349383	0.599294	0.251597	0.600312
Mtco2	Cytochrome c oxidase subunit 2 OS=Mus musculus GN=Mtco2 PE=1 SV=1	4.41	26147.6	1197.23	P00405	6	30.84	0	COX2_MOUSE	427.53	459.73	416.11	449.02	375.19	420.62	438.26	482.43	493.13	432.07	426.22	533.57	384.05	315.73	393.59	407.59	489.22	494.23	577.53	575.25	494.71	500.23	477.42	406.87	446.16	459.7		0.0282699	0.596543	0.253196	0.597213
Slc25a3	Phosphate carrier protein, mitochondrial OS=Mus musculus GN=Slc25a3 PE=1 SV=1	9.49	40088.6	2161.6	Q8VEM8	12	39.5	0	MPCP_MOUSE	512.8	498.28	435.83	444.53	340.66	375.55	403.28	391.92	439.5	482.32	450.59	495.41	380.79	352.76	341.01	377.92	531.01	497.43	479.95	557.88	446.73	521.94	413.89	510.34	439.22	450.97		0.0290227	0.594313	0.2545	0.595021
Hspa12a	Heat shock 70 kDa protein 12A OS=Mus musculus GN=Hspa12a PE=1 SV=1	6.32	75213.7	2301.78	Q8K0U4	24	49.48	0	HS12A_MOUSE	1111.19	812.18	829.02	1055.25	861	1147.5	1041.65	1063.19	933.36	1230.11	893.22	1327.14	887.31	751.04	926.08	834.19	954.06	1023.59	980.88	936.43	1052.51	1167.26	1209.82	1351.97	1025.4	1006.26		-0.0284555	0.584868	0.260095	0.585559
Hadha	Trifunctional enzyme subunit alpha, mitochondrial OS=Mus musculus GN=Hadha PE=1 SV=1	9.46	83354.3	1608.06	Q8BMS1	24	47.44	0	ECHA_MOUSE	841.57	651.5	676.9	904.59	946.02	1071.09	1177.99	1205.94	1071.53	1205.67	862.75	1303.01	715.18	475.79	778.1	578.95	1061.85	1192.44	1215.04	1187.91	1035.31	1247.66	1092.03	1216.47	993.21	983.06		-0.0454984	0.582947	0.261248	0.584719
Gnai1	Guanine nucleotide-binding protein G(i) subunit alpha-1 OS=Mus musculus GN=Gnai1 PE=2 SV=1	5.59	40931.4	1919.51	B2RSH2	9	31.64	0	GNAI1_MOUSE	139.68	135.87	129.01	124.61	91.52	102.97	118.67	103.83	137.95	130.84	131.57	160.92	128.97	98.83	119.26	122.46	137.81	131.67	108.22	134.11	127.28	132.16	138.83	144.74	125.62	127.03		0.0243002	0.583981	0.260627	0.584486
Hdlbp	Vigilin OS=Mus musculus GN=Hdlbp PE=1 SV=1	6.42	142313	150	Q8VDJ3	2	2.44	0	VIGLN_MOUSE	328.1	320.18	276.88	284.81	194.19	NA	NA	254.98	335.22	326.07	307.26	349.62	NA	NA	NA	NA	264.02	NA	NA	NA	315.53	345.3	215.94	309.78	297.73	290.11		-0.0379372	0.577805	0.26436	0.579049
Slc25a11	Mitochondrial 2-oxoglutarate/malate carrier protein OS=Mus musculus GN=Slc25a11 PE=1 SV=3	10.25	34326.1	214.18	Q9CR62	3	15.61	0	M2OM_MOUSE	67.85	77.08	74.27	89.41	NA	59.63	66.46	70.68	85.72	85.74	73.1	87.81	NA	NA	NA	NA	96.23	93.77	99.63	101.35	NA	55.96	57.36	57.75	76.16	80.29		0.0376077	0.577805	0.26436	0.579027
Myh14	Myosin-14 OS=Mus musculus GN=Myh14 PE=1 SV=1	5.32	229498	253.53	Q6URW6	6	3.4	0	MYH14_MOUSE	397.6	408.48	370.06	353.09	306.54	290.11	270.49	337.23	547.54	477.38	454.03	488	297.68	238.71	333.71	334.81	276.16	218.73	364.36	444.28	543.65	541.76	510.4	598.04	391.71	391.86		-0.0428736	0.576918	0.2649	0.578509
Atp5h	ATP synthase subunit d, mitochondrial OS=Mus musculus GN=Atp5h PE=1 SV=3	5.37	18806.5	3128.5	Q9DCX2	9	68.94	0	ATP5H_MOUSE	149.73	153.28	156.45	159.4	111.52	112.53	126.91	133.54	136.86	134.75	142.75	146.49	124.85	107.23	111.84	120.38	165.02	145.31	146.39	165.07	152	156.81	126.59	123.37	138.68	137.07		-0.0226671	0.577805	0.26436	0.578249
Decr1	2,4-dienoyl-CoA reductase, mitochondrial OS=Mus musculus GN=Decr1 PE=1 SV=1	9.29	36499	378.96	Q9CQ62	2	6.87	0	DECR_MOUSE	70.09	66.32	71.36	66.76	66.23	66.9	72.72	89.5	84.88	83.17	74.43	84.38	NA	NA	NA	NA	80.99	79.28	91.36	85.44	67.72	75.55	64.6	62.98	74.73	75.99		0.0209307	0.567713	0.270575	0.568099
Gnai3	Guanine nucleotide-binding protein G(k) subunit alpha OS=Mus musculus GN=Gnai3 PE=1 SV=3	5.36	41108.5	883.17	Q9DC51	5	16.1	0	GNAI3_MOUSE	36.52	35.75	39.74	35.59	14.03	14.59	15.76	16.14	36.01	23.86	34.57	57.58	24.46	35.66	36.39	25.11	38.11	18.18	23.74	27.02	22.52	44.2	25.23	27.85	30.01	29.04		0.0492749	0.565703	0.27183	0.567844
Pdha1	Pyruvate dehydrogenase E1 component subunit alpha, somatic form, mitochondrial OS=Mus musculus GN=Pdha1 PE=1 SV=1	8.14	43916.1	551.84	P35486	8	26.41	0	ODPA_MOUSE	170.01	132.55	157.57	151.44	126.42	121.77	156.96	172.13	116.21	136.01	110.83	122.07	NA	NA	NA	100.44	154.68	148.55	155.25	160.98	146.38	113.79	147.82	109.61	139.5	137.5		-0.0249335	0.566936	0.271059	0.567484
Stk39	STE20/SPS1-related proline-alanine-rich protein kinase OS=Mus musculus GN=Stk39 PE=1 SV=1	5.87	60833.2	575.04	Q9Z1W9	8	20.14	0	STK39_MOUSE	290.41	141.87	248.99	321.09	244.29	343.17	298.81	319.85	424.04	415.74	348.04	545.99	195.84	NA	NA	NA	276.99	347.56	370.97	235.22	362.69	497.61	280.37	265.38	328.52	314.73		-0.0426866	0.564808	0.27239	0.566419
Ap2m1	AP-2 complex subunit mu OS=Mus musculus GN=Ap2m1 PE=1 SV=1	9.88	49996.9	400.93	P84091	5	15.86	0	AP2M1_MOUSE	133.39	123.19	122.84	133.31	96.75	85.09	111.12	95.91	135.98	116.91	126.54	143.89	134.06	NA	NA	NA	113.66	106.72	110.54	134.22	121.39	111.82	119.06	123.13	118.74	119.4		0.0204179	0.564808	0.27239	0.565177
Plec	Plectin OS=Mus musculus GN=Plec PE=1 SV=3	5.63	536127	515.7	Q9QXS1	95	26.07	0	PLEC_MOUSE	2819.37	2797.84	2727.16	2769.91	2536.38	2405.36	2823.02	2535.43	3032.54	3132.79	2935.76	3293.05	2438.3	2317.75	2053.03	2430.49	2799.08	2735.41	2676.42	2805.78	3137.63	3406.63	3161.91	3741.4	2817.38	2808.65		-0.0184281	0.562556	0.273807	0.562858
Vcp	Transitional endoplasmic reticulum ATPase OS=Mus musculus GN=Vcp PE=1 SV=4	4.95	90006.3	941.46	Q01853	15	30.52	0	TERA_MOUSE	784.55	473.03	516.18	571.37	388.61	535.83	487.98	598.22	535.19	662.33	494.54	458.62	410.7	321.23	338.9	359.37	524.82	629.76	639.42	761.96	534.87	715.37	577.53	724.27	542.2	544.85		-0.0307712	0.561788	0.274291	0.56263
Reep5	Receptor expression-enhancing protein 5 OS=Mus musculus GN=Reep5 PE=1 SV=1	8.54	21278.8	889.97	Q60870	2	10.27	0	REEP5_MOUSE	259.24	284.61	259.87	267.61	149.21	156.18	170.94	174.54	245.75	237.59	219.16	231.49	192.02	196.13	163.7	198.43	207.29	195.18	203.31	202.76	270.96	285.97	276.87	299.23	221.35	224.32		0.0258058	0.561788	0.274291	0.56238
Dynll1	Dynein light chain 1, cytoplasmic OS=Mus musculus GN=Dynll1 PE=1 SV=1	7.23	10537	11087.1	P63168	4	57.3	0	DYL1_MOUSE	118.75	119.02	129.42	120.62	118.47	112.33	132.15	126.98	127.32	118.6	130.32	130.32	132.55	100.81	117.88	119.23	130.76	113.75	115.4	123.95	123.27	127.17	131.02	139.75	123.69	122.96		-0.0116448	0.561788	0.274291	0.561908
Hsp90b1	Endoplasmin OS=Mus musculus GN=Hsp90b1 PE=1 SV=2	4.55	92761.1	572.67	P08113	16	23.19	0	ENPL_MOUSE	375.78	369.36	340.63	364.48	208.14	200.03	227.46	252.19	346.51	332.51	330.78	367.53	230.64	210.97	227.59	244.17	309.42	289.31	320.49	359.59	344.78	382.84	347.2	362.08	309.61	302.42		-0.0263811	0.560814	0.274907	0.561434
Phb2	Prohibitin-2 OS=Mus musculus GN=Phb2 PE=1 SV=1	10.19	33296.4	1445.2	O35129	10	41.14	0	PHB2_MOUSE	227.78	199.35	175.03	177.85	150.22	183.11	180.85	182.84	202.98	204.11	182.59	211.12	171.43	131.46	146.9	160.65	218.38	213.43	233.94	254.46	198.63	230.89	183.92	194.22	189.82	194.86		0.0196261	0.560814	0.274907	0.561157
Mpc1	Mitochondrial pyruvate carrier 1 OS=Mus musculus GN=Mpc1 PE=1 SV=1	9.9	12625.7	666.74	P63030	2	31.19	0	MPC1_MOUSE	26.15	25.97	26.03	46.03	48.23	53.83	62.37	26.37	39.81	24.81	44.43	57.88	NA	NA	NA	NA	63.17	28.22	39.72	42.2	47.67	41.43	30.75	29.23	40.16	40.3		0.039095	0.559611	0.27567	0.560975
Vps35	Vacuolar protein sorting-associated protein 35 OS=Mus musculus GN=Vps35 PE=1 SV=1	5.13	92511.5	174.14	Q9EQH3	2	2.89	0	VPS35_MOUSE	178.33	311.72	175.27	178.03	125.76	NA	NA	NA	245.41	239.57	237.97	226.59	261.51	258.54	293.4	332.62	174.29	NA	NA	189.07	159.64	173.06	171.66	174.4	213.18	218.82		0.0330592	0.559646	0.275648	0.560621
Aldoa	Fructose-bisphosphate aldolase A OS=Mus musculus GN=Aldoa PE=1 SV=2	8.07	39812.2	9653.95	P05064	23	82.14	0	ALDOA_MOUSE	1953.24	1749.26	1551.43	1673.9	1383.02	1393.22	1687.46	1539.47	2126.36	2110.18	1973.05	2139.35	1287.02	1307.75	1163.26	1229.09	1980.68	1964.72	1714.26	2268.43	2042.52	2260.33	2047.84	1999.9	1773.33	1772.15		-0.0240759	0.559646	0.275648	0.560163
Arhgdia	Rho GDP-dissociation inhibitor 1 OS=Mus musculus GN=Arhgdia PE=1 SV=3	4.91	23464.5	1391.02	Q99PT1	5	40.69	0	GDIR1_MOUSE	110.74	117.26	104.38	96.53	72.96	63.54	88.18	88.23	99.26	97.64	90.61	103.41	109.68	119.54	105.6	121.78	94.08	85.84	123.05	74.7	72.68	85.83	82.29	79.42	94.39	96.21		0.0209856	0.559646	0.275648	0.560039
Svip	Small VCP/p97-interacting protein OS=Mus musculus GN=Svip PE=3 SV=1	9.46	8477.66	2540.08	Q3UZP4	2	32.47	0	SVIP_MOUSE	39.99	40.09	46.71	45.32	52.49	49.96	54.66	60.47	38.35	37.23	42.25	45.8	59.2	52.71	54.02	52.53	61.51	46.97	47.76	43.59	35.41	35.22	32.37	31.65	46.11	46.08		-0.0213491	0.55835	0.276471	0.558758
Uqcrc1	Cytochrome b-c1 complex subunit 1, mitochondrial OS=Mus musculus GN=Uqcrc1 PE=1 SV=2	5.76	53479.2	1243.21	Q9CZ13	16	50.63	0	QCR1_MOUSE	422.48	422.36	415.4	425.75	262.93	369.59	412.45	432.53	457.54	416.65	430.79	484.02	324.21	289.6	313.14	302.27	494.38	509.15	461.48	472.26	439.44	425.87	445.09	453.84	412.71	410.89		-0.0198931	0.55835	0.276471	0.558704
Atp5b	ATP synthase subunit beta, mitochondrial OS=Mus musculus GN=Atp5b PE=1 SV=2	5.03	56300.6	9952.63	P56480	23	67.67	0	ATPB_MOUSE	2700.46	2742.98	2422.98	2211.18	1845.79	2079.48	1957.69	2231.9	2306.06	2530.06	2444.43	2570.33	1940.86	1907.18	1820.66	1870.94	2366.19	2466.07	2706.07	3122.7	2459.47	2454.13	2314.07	2464.09	2336.95	2324.37		-0.0157755	0.55587	0.278054	0.556094
Capzb	F-actin-capping protein subunit beta OS=Mus musculus GN=Capzb PE=1 SV=3	5.34	31630.7	536.28	P47757	4	14.8	0	CAPZB_MOUSE	101.16	109.51	108.49	100.78	73.32	83.56	86.05	66.97	61.85	68.26	86.95	96.74	113.26	77.14	NA	NA	134.31	91.44	55.7	82.43	79.48	78.8	56.11	101.28	86.97	87		-0.0245804	0.555195	0.278487	0.555738
Lin7c	Protein lin-7 homolog C OS=Mus musculus GN=Lin7c PE=1 SV=2	8.76	21948.1	1143.48	O88952	4	22.84	0	LIN7C_MOUSE	65.1	66.98	64.23	67.17	51	51.6	62.8	56.49	59.34	57.37	59.57	66.45	66.34	54.08	48.7	56.25	62.45	58.88	58.64	64.12	66.61	71.79	52.66	63.19	60.68	60.31		-0.0108687	0.549401	0.282227	0.549508
Gstm1	Glutathione S-transferase Mu 1 OS=Mus musculus GN=Gstm1 PE=1 SV=2	8.12	26084.1	7431.9	P10649	14	64.68	0	GSTM1_MOUSE	599.05	543.13	464.6	545.74	3341.14	389.43	571.56	727.07	409.02	336.47	273.21	335.28	797.47	693.58	514.42	501.54	564.24	446	447.57	557.38	545.95	651.35	460.73	520.91	711.31	558.43		0.0369378	0.544358	0.285523	0.54561
Art3	Ecto-ADP-ribosyltransferase 3 OS=Mus musculus GN=Art3 PE=2 SV=2	5.66	42357.1	298.63	Q8R2G4	2	8.09	0	NAR3_MOUSE	172.78	104.94	120.55	141.26	172.26	246.42	176.46	271.79	144.36	190.69	110.88	150.71	NA	NA	NA	NA	117.92	148.49	178.17	210.44	134.09	162.49	144.4	239.82	166.92	166.98		0.0224932	0.544117	0.285682	0.544581
Vapb	Vesicle-associated membrane protein-associated protein B OS=Mus musculus GN=Vapb PE=2 SV=3	7.84	27174.4	514.01	Q9QY76	6	34.98	0	VAPB_MOUSE	127.1	126.95	116.46	108.6	50.69	70.61	83.49	47.98	113.6	92.23	111.26	118.31	90.02	70.14	87.08	92.36	74.18	92.53	114.69	110.63	99.11	82.81	107.39	122.87	97.27	95.32		0.0205976	0.544117	0.285682	0.544506
Sdha	Succinate dehydrogenase [ubiquinone] flavoprotein subunit, mitochondrial OS=Mus musculus GN=Sdha PE=1 SV=1	7.03	73669.1	520.17	Q8K2B3	10	25.45	0	SDHA_MOUSE	314.47	324.21	385.2	386.96	371.74	366.57	410.6	324.36	353	324.73	387.51	390.5	305.6	200.65	204.98	219.01	532.82	479.95	475.92	489.72	421.02	382.92	384.19	399.95	361.65	374.73		-0.0196029	0.544117	0.285682	0.54447
Cct6a	T-complex protein 1 subunit zeta OS=Mus musculus GN=Cct6a PE=1 SV=3	6.66	58460.6	373.89	P80317	6	17.14	0	TCPZ_MOUSE	159.78	115.14	119.87	195.89	199.85	214.15	168.67	238.99	206.55	266.69	183.98	258.29	NA	152.52	147.22	139.21	166.59	218.08	190.9	191.9	168.27	224.49	202.09	282.18	193.99	189.4		-0.0192224	0.544117	0.285682	0.544456
Map4	Microtubule-associated protein 4 OS=Mus musculus GN=Map4 PE=1 SV=3	4.7	118000	2861.76	P27546	36	49.24	0	MAP4_MOUSE	2356.61	2381.06	2164.53	2277.53	1474.17	1619.58	1727.83	1812.63	2504.26	2621.1	1999.3	2261.32	2018.7	1864.48	1799.81	2004.82	2218.72	1954.85	2164.18	2140.11	2044.74	2187.91	1972.84	2320.96	2099.99	2057.68		-0.0112793	0.544117	0.285682	0.544234
Slc2a1	Solute carrier family 2, facilitated glucose transporter member 1 OS=Mus musculus GN=Slc2a1 PE=1 SV=4	9.04	54326.9	212.04	P17809	2	3.66	0	GTR1_MOUSE	382.09	371.8	310.59	338.35	201.57	205.02	253.29	278.26	314.77	336.08	270.99	329.02	380.19	374.59	296.11	395.49	226.53	281.7	213.94	265.59	237.6	303.76	282.61	294.43	299.32	296.05		-0.0146228	0.541998	0.287079	0.542195
Pfkp	ATP-dependent 6-phosphofructokinase, platelet type OS=Mus musculus GN=Pfkp PE=1 SV=1	6.72	86481.7	245.81	Q9WUA3	8	14.54	0	PFKAP_MOUSE	167.99	160	211.69	179.78	145.97	180.84	189.95	198.28	192.99	221.19	224.78	238.48	NA	NA	NA	NA	179.06	212.2	185.8	200.71	183.62	202.6	177.02	199.28	192.66	192.54		0.0103187	0.540824	0.287856	0.540922
Cct3	T-complex protein 1 subunit gamma OS=Mus musculus GN=Cct3 PE=1 SV=1	6.26	61200.4	589.95	P80318	5	12.48	0	TCPG_MOUSE	504.46	571.29	383.58	401.2	398.84	115.2	374.47	178.22	291.52	131.24	334.13	308.88	374.99	555.09	424.99	435.65	179.58	229.3	315.1	255.38	162.86	314.79	359.74	283.66	332.75	324.26		0.0262583	0.539596	0.288671	0.540235
Slc25a12	Calcium-binding mitochondrial carrier protein Aralar1 OS=Mus musculus GN=Slc25a12 PE=1 SV=1	8.29	74968.9	488.03	Q8BH59	5	15.07	0	CMC1_MOUSE	239.13	130.93	177.48	296.07	191.65	613.41	385.59	436.16	233.85	235.64	182.5	338.07	NA	NA	NA	NA	232.65	320.65	358.89	365.75	198.81	247.5	222.22	246.22	288.37	274.09		0.0243042	0.539596	0.288671	0.540144
Vdac1	Voltage-dependent anion-selective channel protein 1 OS=Mus musculus GN=Vdac1 PE=1 SV=3	8.67	32522.6	2544.64	Q60932	10	49.32	0	VDAC1_MOUSE	427.73	450.98	466.16	428.41	271.57	287.98	360.91	334.59	422.97	436.53	416.7	449.72	345.91	293.85	295.08	298.99	425.97	414.32	438.84	462.63	449.54	470.03	427.39	392.32	396.19	392.91		-0.0120885	0.53981	0.288529	0.539945
Atp5a1	ATP synthase subunit alpha, mitochondrial OS=Mus musculus GN=Atp5a1 PE=1 SV=1	9.52	59866.8	7201.92	Q03265	26	60.22	0	ATPA_MOUSE	1954.73	1767.44	1873.12	1656.88	1513.28	1447.31	1828.5	1702.68	2100.87	2111.55	1859.43	2043.84	1554.14	1377.21	1361.28	1397.69	2279.2	2117.11	2116.72	2192.27	1908.18	1954.16	1914.5	2070.45	1821.64	1853.58		0.0107429	0.53976	0.288563	0.539867
Pitpna	Phosphatidylinositol transfer protein alpha isoform OS=Mus musculus GN=Pitpna PE=1 SV=2	5.93	32121.6	376.27	P53810	4	19.56	0	PIPNA_MOUSE	109.76	112.07	108.92	117.69	58.32	72.42	58.39	68.98	102.56	91.95	66.12	90.36	NA	NA	NA	NA	83.11	NA	69.75	93.43	72.88	76.67	87.5	116.34	88.13	85.67		-0.0154882	0.537651	0.289967	0.537874
Pfkm	ATP-dependent 6-phosphofructokinase, muscle type OS=Mus musculus GN=Pfkm PE=1 SV=3	7.9	86124.2	275.15	P47857	7	9.87	0	PFKAM_MOUSE	202.11	162.46	281.03	210.28	157.83	134.55	222.34	168.99	223.2	204.18	237.07	294.45	NA	NA	NA	NA	213.5	246.49	202.85	295.46	186.14	210.1	120.92	210.18	208.21	210.7		0.0143693	0.536305	0.290868	0.536497
Hnrnpa2b1	Heterogeneous nuclear ribonucleoproteins A2/B1 OS=Mus musculus GN=Hnrnpa2b1 PE=1 SV=2	9.19	37459.8	297.6	O88569	3	9.92	0	ROA2_MOUSE	88.9	81.4	77.83	81.92	72.32	64.88	86.92	61.59	77.16	65.97	86.97	63.73	NA	NA	NA	NA	78.55	NA	63.81	79.44	83.34	81.58	66.36	78.26	75.8	75.91		0.00687679	0.530035	0.295097	0.53008
Fkbp1a	Peptidyl-prolyl cis-trans isomerase FKBP1A OS=Mus musculus GN=Fkbp1a PE=1 SV=2	8.66	11979.7	3637.91	P26883	3	40.74	0	FKB1A_MOUSE	61.23	57.87	75.92	69.55	NA	27.11	35.63	29.15	56.42	38.7	70.25	79.65	102.35	93.25	78.24	126.15	35.91	81.74	44.56	NA	27.65	42.04	21.26	18.35	54.68	61.04		-0.0185502	0.525312	0.298324	0.52564
Calm1	Calmodulin OS=Mus musculus GN=Calm1 PE=1 SV=2	3.88	16837.7	1638.11	P62204	8	53.02	0	CALM_MOUSE	150.76	109.76	250.91	228.23	87.21	129.71	131.06	111.62	145.61	103.78	135.17	124.55	130.58	139.4	131.87	122.6	220.88	192.73	91.45	103.6	196.17	188.94	91.54	105.9	142.36	142.97		0.00802431	0.522962	0.299943	0.523023
Rpl22	60S ribosomal protein L22 OS=Mus musculus GN=Rpl22 PE=1 SV=2	9.61	14816	400.76	P67984	2	18.75	0	RL22_MOUSE	42.34	44.56	50.62	46.14	25.74	33.18	29.02	33.29	46.68	39.98	43.53	46.75	NA	NA	NA	NA	33.67	33.63	24.01	39.43	47.59	46.7	46.68	49.81	40.15	40.19		-0.00690199	0.522962	0.299943	0.523007
Idh3a	Isocitrate dehydrogenase [NAD] subunit alpha, mitochondrial OS=Mus musculus GN=Idh3a PE=1 SV=1	6.27	40095	592.68	Q9D6R2	9	27.87	0	IDH3A_MOUSE	200.14	201.09	208.63	183.23	136.5	140.44	177.32	178.28	212.61	205.83	253.73	221.43	128.3	116.1	127.98	148.05	262.19	188.88	216.62	238.09	253.1	239.01	212.91	233.5	193.27	197.06		-0.00671024	0.522962	0.299943	0.523005
Rpl12	60S ribosomal protein L12 OS=Mus musculus GN=Rpl12 PE=1 SV=2	9.9	17975.7	1306.26	P35979	6	54.55	0	RL12_MOUSE	67.89	63.77	64.76	66.11	38.13	40.58	48.02	46.59	63.99	63.16	68.62	71.21	45.54	41.82	42.26	43.56	70.74	54.61	47.68	61.9	74.77	77.5	73.22	78.01	58.57	59.3		0.00518546	0.520715	0.301498	0.520741
Map6	Microtubule-associated protein 6 OS=Mus musculus GN=Map6 PE=1 SV=2	9.92	96735	178.32	Q7TSJ2	4	5.41	0	MAP6_MOUSE	211.8	208.07	210.99	231.41	178.66	169.77	207.47	197.04	163.33	242.78	178.87	230.26	NA	465.87	NA	225.42	198.96	NA	NA	192.16	157.24	148.46	139.1	NA	202.54	218.17		-0.00364855	0.515512	0.305132	0.515525
Col4a2	Collagen alpha-2(IV) chain OS=Mus musculus GN=Col4a2 PE=2 SV=4	8.5	168523	138.27	P08122	4	2.69	0	CO4A2_MOUSE	352.73	375.45	363.8	423.25	435.57	385.92	431.82	480.76	554.24	553.83	561.16	635.82	NA	NA	NA	NA	410.84	518.83	380.39	411.52	463.31	561.26	426.8	487.43	462.86	457.55		-0.00193788	0.515512	0.305132	0.515516
Uqcrc2	Cytochrome b-c1 complex subunit 2, mitochondrial OS=Mus musculus GN=Uqcrc2 PE=1 SV=1	9.57	48292	1171.18	Q9DB77	15	44.15	0	QCR2_MOUSE	382.03	403.71	336.51	354.58	341.57	364.27	392.17	405.84	425.74	375.92	388.02	462.91	296.12	294.67	278.7	304.93	466.03	439.89	427.07	493.32	404.65	433.82	403.66	468.25	386.1	392.59		0.00171829	0.515512	0.305132	0.515515
Ap2a1	AP-2 complex subunit alpha-1 OS=Mus musculus GN=Ap2a1 PE=1 SV=1	6.63	108748	329.8	P17426	6	8.5	0	AP2A1_MOUSE	195.47	204.89	193.24	184.74	141.74	137.56	133.36	135.05	189.39	192.99	166.04	213.8	NA	NA	NA	NA	NA	NA	NA	NA	NA	NA	NA	NA	174.02	0		NA	NA	NA	0
Actr2	Actin-related protein 2 OS=Mus musculus GN=Actr2 PE=1 SV=1	6.3	45046	196.78	P61161	2	6.09	0	ARP2_MOUSE	133.12	142.38	138.11	119.08	157.04	NA	174.89	NA	63.29	53.69	46.46	71.22	NA	NA	NA	NA	NA	NA	NA	NA	NA	NA	NA	NA	109.93	0		NA	NA	NA	0
Atp1a4	Sodium/potassium-transporting ATPase subunit alpha-4 OS=Mus musculus GN=Atp1a4 PE=1 SV=3	5.37	116085	1209.69	Q9WV27	10	10.08	0	AT1A4_MOUSE	219.91	244.3	225.21	228.02	155.12	159.43	197.69	172.37	248.61	235.34	219.86	242.88	NA	NA	NA	NA	NA	NA	NA	NA	NA	NA	NA	NA	212.39	0		NA	NA	NA	0
Calu	Calumenin OS=Mus musculus GN=Calu PE=1 SV=1	4.3	37177.8	224.37	O35887	2	8.25	0	CALU_MOUSE	62.82	53.95	84.7	86.05	NA	63.34	NA	NA	54.26	68.82	60.09	60.2	NA	NA	NA	NA	NA	NA	NA	NA	NA	NA	NA	NA	66.02	0		NA	NA	NA	0
Dnpep	Aspartyl aminopeptidase OS=Mus musculus GN=Dnpep PE=2 SV=2	6.85	52777.2	218	Q9Z2W0	2	5.5	0	DNPEP_MOUSE	72.18	69.03	NA	NA	NA	NA	NA	77.94	84.8	78.9	74.58	75.63	NA	NA	NA	NA	NA	NA	NA	NA	NA	NA	NA	NA	76.15	0		NA	NA	NA	0
Gnb4	Guanine nucleotide-binding protein subunit beta-4 OS=Mus musculus GN=Gnb4 PE=2 SV=4	5.7	38120.4	1093.49	P29387	4	19.71	0	GBB4_MOUSE	26.09	38.5	22.91	23.72	16.09	15.31	19.58	19.24	18.66	34.9	16.19	20.93	NA	NA	NA	NA	NA	NA	NA	NA	NA	NA	NA	NA	22.68	0		NA	NA	NA	0
Alad	Delta-aminolevulinic acid dehydratase OS=Mus musculus GN=Alad PE=1 SV=1	6.33	36479.8	300.9	P10518	2	6.97	0	HEM2_MOUSE	74	89.79	83.07	86.75	72.83	56.36	82.98	75.47	63.78	68.87	51.85	71.99	NA	NA	NA	NA	NA	NA	NA	NA	NA	NA	NA	NA	73.15	0		NA	NA	NA	0
Ighv3-6	Ig heavy chain V region 3-6 OS=Mus musculus GN=Ighv3-6 PE=1 SV=1	9.06	13209	1127.28	P18531	2	31.03	0	HVM60_MOUSE	NA	NA	NA	NA	NA	NA	NA	NA	NA	NA	NA	NA	NA	NA	NA	NA	69.7	51.11	60.83	69.91	113.04	112.26	99.27	88.51	0	83.08		NA	NA	NA	0
	Ig gamma-3 chain C region OS=Mus musculus PE=1 SV=2	6.76	44499.4	317.32	P03987	3	8.29	0	IGHG3_MOUSE	NA	NA	NA	NA	NA	NA	NA	NA	NA	NA	NA	NA	NA	NA	NA	NA	NA	NA	NA	NA	83.5	109.27	100.39	106.87	0	100.01		NA	NA	NA	0
Ncdn	Neurochondrin OS=Mus musculus GN=Ncdn PE=1 SV=1	5.23	80321.1	174	Q9Z0E0	2	3.7	0	NCDN_MOUSE	123.51	137.98	110.69	116.57	NA	NA	NA	NA	NA	NA	NA	NA	NA	NA	NA	NA	NA	NA	NA	NA	NA	NA	NA	NA	122.19	0		NA	NA	NA	0
Plcd1	1-phosphatidylinositol 4,5-bisphosphate phosphodiesterase delta-1 OS=Mus musculus GN=Plcd1 PE=2 SV=2	5.77	86671.7	271.96	Q8R3B1	5	7.8	0	PLCD1_MOUSE	180.03	195.45	177.95	196.07	163.53	173.95	184.54	173.03	212.47	214.99	195.98	225.72	NA	NA	NA	NA	NA	NA	NA	NA	NA	NA	NA	NA	191.14	0		NA	NA	NA	0
Prdx4	Peroxiredoxin-4 OS=Mus musculus GN=Prdx4 PE=1 SV=1	6.76	31280.7	2310.8	O08807	2	8.03	0	PRDX4_MOUSE	18.77	20.77	17.24	14.75	33.7	35.15	20.11	23.95	22.11	21.21	22.36	25.42	NA	NA	NA	NA	NA	NA	NA	NA	NA	NA	NA	NA	22.96	0		NA	NA	NA	0
Vsnl1	Visinin-like protein 1 OS=Mus musculus GN=Vsnl1 PE=1 SV=2	4.82	22313.5	439.6	P62761	2	12.04	0	VISL1_MOUSE	77.8	75.48	70.76	70.51	49.48	39.44	NA	NA	50.04	67.15	46.98	52.94	NA	NA	NA	NA	NA	NA	NA	NA	NA	NA	NA	NA	60.06	0		NA	NA	NA	0
SPIKE	Enolase 1 OS=Saccharomyces cerevisiae (strain ATCC 204508 / S288c) GN=ENO1 PE=1 SV=3	6.15	46873.2	10561.3	P00924	12	35.47	0	ENO1_YEAST	5726.88	6231.27	5867.8	5763.63	4563.8	4842.18	6463.88	6257.06	4216.65	4303.23	3180.66	3952.57	6157.31	5131.02	6971.74	7093.16	4993.42	4379.42	4873.96	5708.27	4381.57	4586.25	3689.51	4344.82	5114.13	5192.54
TRYPSIN	Trypsin OS=Sus scrofa PE=1 SV=1	6.91	25093.8	2336.83	P00761	6	35.5	0	TRYP_PIG	3435.27	3846.25	3390.96	3497.99	3615.32	2321.21	3270.58	2995.8	2637.95	3055.98	2646.57	2968.26	3879.97	3568.17	3313.28	3824.86	3269.52	2982.61	2637.82	3078.17	3192.11	2932.47	2726.69	3037.01	3140.18	3203.56
